# Supplementary material for: Identification of Differentially Expressed Genes in Different Types of Broiler Skeletal Muscle Fibers Using the RNA-seq Technique
Source: Biomed Res Int. 2020 Jul 4;2020:9478949. doi: 10.1155/2020/9478949 (PMC7362283; doi:10.1155/2020/9478949)
Supplement: Supplementary Materials — Table S1: primer sequences for the genes selected for qRT-PCR. Table S2: DEGs identified under certain filter criteria. Table S3: GO enrichment analysis of DEGs. Table S4: KEGG pathway analysis of DEGs. [file 9478949.f1.zip]

Archive with 5 entries (5 files):
- 9478949.f1/Supplementary Materials.xlsx
- 9478949.f1/Table S1.xlsx
- 9478949.f1/Table S2.xlsx
- 9478949.f1/Table S3.xlsx
- 9478949.f1/Table S4.xlsx
