# Supplementary material for: Identification of Differentially Expressed Genes in Different Types of Broiler Skeletal Muscle Fibers Using the RNA-seq Technique
Source: Biomed Res Int. 2020 Jul 4;2020:9478949. doi: 10.1155/2020/9478949 (PMC7362283; doi:10.1155/2020/9478949)
Supplement: Supplementary Materials — Table S1: primer sequences for the genes selected for qRT-PCR. Table S2: DEGs identified under certain filter criteria. Table S3: GO enrichment analysis of DEGs. Table S4: KEGG pathway analysis of DEGs. [file 9478949.f1.zip › 9478949.f1/Supplementary Materials.xlsx]

## Sheet: Table S1-Primer Sequence
Gene name	primer sequence(5'-3')
GAPDH	F: CGATCTGAACTACATGGTTTAC
	R: TCTGCCCATTTGATGTTGC
FHL1	F: CCCATCACTTCTGGAGGT
	R: TTGGAGCAAATGAAACAC
MYBPC1	F: AGTTAGCACACCACCAGC
	R: TTTCTCCAATAGACCATA
ADPRHL1	F: ATGTGCTTAGGGATGCGT
	R: CCTGTAGGGTGGTTGTGA
TPM4	F: GCTCAACAGACGCATCCA
	R: CCCCTCCAAAATCACCAA
TNNC1	F: TTGTTATGATGGTTCGGT
	R: TCGTCTCTCCAGTTGCCT
MYH1C	F: CTTATTACCACCAACCCA
	R: CATCAGCAGTGAAGCCCA
BPGM	F: AGTGATGGAATAAAGGAA
	R: TAGAGGTGAAGACAAGGT
MYHC IIA	F: CCACCAATCCATACGACT
	R: CTGGCTCTGCTTGCTCT
MYHC IIB	F: TCAAACAGAAACAGCGAG
	R: GCGAACAACCATCCACAA
MYHC I	F: ACGGAGGAGGACCGTAAGAA
	R: GGACAGGTTGCAGTTGGACT
F: fordward primer R: reverse primer

## Sheet: Table S1-Sample Test Quality 
Sample Name	Concentration (ng/ul)	Volume (μl)	Total RNA (μg)	RIN Value	28S/18S	OD 260/280	OD 260/230	Sample Status
P1T	298.5	18	5.4	6.1	0.57	1.97	1.64	Normal
P2T	204.8	18	3.7	5.3	0.2	2.05	1.32	Normal
P3T	264.7	18	4.8	5.8	0.45	2.01	1.08	Normal
P4T	175.6	18	3.2	5.4	0.24	2	1.05	Normal
P5T	190.2	18	3.4	5.7	0.53	1.94	1.34	Normal
P1X	346.9	18	6.2	6.6	1.15	1.94	1.82	Normal
P2X	503.9	18	9.1	6.4	1	1.97	1.77	Normal
P3X	299.2	18	5.4	6.2	0.84	1.92	2.04	Normal
P4X	234	18	4.2	6.2	0.96	2	1.21	Normal
P5X	243.2	18	4.4	6.1	0.69	2	1.3	Normal

## Sheet: Table S2
#ID	PT1_Count	PT2_Count	PT3_Count	PT4_Count	PT5_Count	PX1_Count	PX2_Count	PX3_Count	PX4_Count	PX5_Count	PT1_FPKM	PT2_FPKM	PT3_FPKM	PT4_FPKM	PT5_FPKM	PX1_FPKM	PX2_FPKM	PX3_FPKM	PX4_FPKM	PX5_FPKM	FDR	log2FC	regulated	COG_class	COG_class_annotation	GO_annotation	KEGG_annotation	KEGG_pathway_annotation	KOG_class	KOG_class_annotation	Pfam_annotation	Swiss-Prot_annotation	eggNOG_class	eggNOG_class_annotation	NR_annotation
Gallus_gallus_newGene_10032	33	15	0	25	2	456	89	47	85	358	0.470458	0.238063	0	0.298841	0.015344	5.99115	1.53254	0.844739	1.64582	7.12946	0.0313426	4.30968	up	--	--	--	--	--	--	--	--	--	--	--	hypothetical protein Anapl_03540 [Anas platyrhynchos]
Gallus_gallus_newGene_10253	180	111	90	105	70	217	241	223	122	189	2.6069	2.50954	1.40984	1.99595	1.44433	3.52536	5.02721	3.84186	3.22685	3.38955	0.038109	1.32035	up	--	--	--	--	--	--	--	--	--	--	--	--
Gallus_gallus_newGene_10688	98	127	109	209	129	7	22	3	19	20	1.67923	1.94392	2.19792	2.57958	2.16861	0.121133	0.321406	0.02927	0.31075	0.335857	3.81694e-05	-2.73834	down	--	--	--	--	--	--	--	--	--	--	--	--
Gallus_gallus_newGene_10859	2392	1249	429	295	1606	9	26	23	6	14	10.6143	4.53885	3.07452	1.12697	9.77297	0.016642	0.045301	0.044763	0.029409	0.054328	0.000183369	-5.87561	down	--	--	--	--	--	--	--	--	--	--	--	--
Gallus_gallus_newGene_10989	93	82	86	61	70	13	28	12	9	22	1.97491	1.6263	1.48261	0.788613	1.31576	0.280818	0.360087	0.185855	0.145374	0.412244	0.0204996	-1.78252	down	--	--	--	--	--	--	--	--	--	--	--	--
Gallus_gallus_newGene_11831	3	0	11	0	0	211	53	159	97	159	0.007616	0	0.034228	0	0	2.11397	0.565118	1.19949	0.969056	1.01482	1.94748e-10	6.1671	up	--	--	--	--	--	--	--	--	--	--	--	--
Gallus_gallus_newGene_11963	1241	553	2778	2084	1411	14180	21071	14802	7549	10785	6.83684	2.776	13.778	9.07693	7.59378	92.1342	100.546	81.1623	49.0488	58.9293	2.68195e-14	3.59935	up	[D]	Cell cycle control, cell division, chromosome partitioning	--	--	--	--	--	Transglutaminase-like superfamily	--	D	Cell cycle control, cell division, chromosome partitioning	PREDICTED: kyphoscoliosis peptidase isoform X1 [Meleagris gallopavo]
Gallus_gallus_newGene_12129	223	347	395	79	338	1262	1168	642	639	938	1.24953	1.34178	1.703	0.288845	1.48565	8.472	6.25357	4.10386	5.93744	8.16334	1.50978e-06	2.23753	up	--	--	--	--	--	--	--	--	--	--	--	--
Gallus_gallus_newGene_12313	109	159	212	127	92	57	0	0	0	0	0.208652	0.277191	0.364591	0.191619	0.170695	0.12765	0	0	0	0	2.18495e-06	-2.91095	down	--	--	--	--	--	--	--	--	--	S	Function unknown	hypothetical protein N322_04680, partial [Cariama cristata]
Gallus_gallus_newGene_12925	300	79	192	208	202	21	23	43	19	16	0.76863	0.1721	0.42389	1.34913	0.550433	0.058123	0.056435	0.101909	0.05115	0.037803	0.000183369	-2.5029	down	--	--	--	--	--	--	--	--	--	--	--	--
Gallus_gallus_newGene_13164	0	39	19	11	3	63	328	391	402	101	0	0.719351	0.334448	0.165427	0.056064	1.52279	5.83784	7.99606	9.73961	2.05354	0.000273977	4.7318	up	--	--	--	--	--	--	--	--	--	--	--	--
Gallus_gallus_newGene_13254	227	118	127	178	286	489	481	414	294	512	1.19049	0.660879	0.648398	0.869317	1.53922	3.3176	3.09551	3.04159	2.13616	3.72353	0.000183369	1.69654	up	--	--	--	--	--	--	--	--	--	S	Function unknown	hypothetical protein N337_06011, partial [Phoenicopterus ruber ruber]
Gallus_gallus_newGene_13537	206	354	272	115	625	14	33	56	20	31	1.34529	2.14468	1.63394	0.59534	4.04503	0.099322	0.179664	0.370734	0.146594	0.204177	0.0146904	-2.91656	down	--	--	--	--	--	--	--	--	--	--	--	hypothetical protein CIB84_003347 [Bambusicola thoracicus]
Gallus_gallus_newGene_13768	97	48	167	127	132	16	2	17	13	19	2.73501	1.26137	4.83409	3.31731	3.86468	0.540598	0.045976	0.48372	0.437644	0.51203	0.000133664	-2.54723	down	--	--	--	--	--	--	--	--	--	--	--	--
Gallus_gallus_newGene_14256	495	1181	581	737	517	13	289	0	109	323	3.21657	7.10215	3.46017	3.7871	3.28318	0.094337	1.62594	0	0.942065	2.08217	0.0105673	-1.86456	down	--	--	--	--	--	--	--	--	--	--	--	PREDICTED: uncharacterized protein LOC106034406 [Anser cygnoides domesticus]
Gallus_gallus_newGene_14909	65	72	29	115	81	92	409	148	202	226	0.48924	0.491803	0.191315	0.685377	0.59283	0.820626	2.68142	1.11436	1.7956	1.69693	0.00258597	2.04356	up	--	--	--	--	--	--	--	--	--	--	--	--
Gallus_gallus_newGene_1536	30	129	120	3	16	1378	2650	2317	90	1319	0.056907	0.193172	0.447098	0.007553	0.025414	4.30485	4.87744	4.9986	0.376405	2.57337	4.04577e-06	5.15846	up	--	--	--	--	--	--	--	--	--	--	--	--
Gallus_gallus_newGene_15489	37	0	0	27	112	183	128	67	224	147	0.137253	0	0	0.080859	0.413779	0.817687	0.420234	0.251281	0.997788	0.551281	0.00344917	2.57141	up	--	--	Molecular Function: motor activity (GO:0003774);; Molecular Function: actin binding (GO:0003779);; Molecular Function: calmodulin binding (GO:0005516);; Molecular Function: ATP binding (GO:0005524);; Cellular Component: myofibril (GO:0030016);; Cellular Component: myosin filament (GO:0032982);;	K10352|1.798e-33|fab:107604013|K10352 myosin heavy chain | (RefSeq) myosin-3-like	Tight junction (ko04530)	[Z]	Cytoskeleton	--	Myosin heavy chain, skeletal muscle, adult OS=Gallus gallus OX=9031 PE=1 SV=4	Z	Cytoskeleton	hypothetical protein CIB84_010615 [Bambusicola thoracicus]
Gallus_gallus_newGene_15819	3660	3247	4130	3038	3258	7745	10644	7417	4730	4198	6.2262	5.0312	6.3114	4.08445	5.41022	15.496	15.6447	12.5305	9.46763	7.06125	0.000552524	1.50576	up	--	--	--	--	--	--	--	Zinc finger, ZZ type;; Anaphase-promoting complex, subunit 10 (APC10)	--	S	Function unknown	PREDICTED: zinc finger ZZ-type and EF-hand domain-containing protein 1 isoform X2 [Coturnix japonica]
Gallus_gallus_newGene_16269	18	13	0	0	0	253	176	339	126	50	0.051803	0.033378	0	0	0	0.89262	0.457503	1.01059	0.443344	0.147165	1.63677e-06	5.40495	up	--	--	--	--	--	--	--	--	--	--	--	--
Gallus_gallus_newGene_16404	10040	5579	12263	7746	11437	14307	19628	15252	10163	8698	12.7084	6.54958	13.955	7.58783	14.1505	21.4253	21.6988	18.6781	15.378	10.6126	0.0105042	1.02998	up	--	--	Molecular Function: ubiquitin-protein transferase activity (GO:0004842);; Cellular Component: nucleoplasm (GO:0005654);; Cellular Component: cytoplasm (GO:0005737);; Cellular Component: centrosome (GO:0005813);; Molecular Function: zinc ion binding (GO:0008270);; Cellular Component: membrane (GO:0016020);; Biological Process: protein ubiquitination involved in ubiquitin-dependent protein cataboli…	K10691|0|cjo:107323414|K10691 E3 ubiquitin-protein ligase UBR4 [EC:2.3.2.27] | (RefSeq) UBR4; ubiquitin protein ligase E3 component n-recognin 4	--	[T]	Signal transduction mechanisms	E3 ubiquitin-protein ligase UBR4;; Putative zinc finger in N-recognin (UBR box)	--	O	Posttranslational modification, protein turnover, chaperones	PREDICTED: E3 ubiquitin-protein ligase UBR4 isoform X4 [Coturnix japonica]
Gallus_gallus_newGene_16454	390	264	328	80	154	47	53	47	10	31	2.12309	1.25355	0.880338	0.185891	0.684054	0.158474	0.187149	0.235143	0.038317	0.106955	0.0105528	-2.23475	down	--	--	--	--	--	--	--	--	--	--	--	--
Gallus_gallus_newGene_16693	160	90	195	116	111	326	260	300	219	237	0.982911	0.719098	0.988279	0.785661	0.746344	1.91209	1.53727	1.37639	1.62186	1.45427	0.00855529	1.52128	up	--	--	--	--	--	--	--	--	--	--	--	--
Gallus_gallus_newGene_17309	251	281	116	539	187	0	0	0	0	0	1.55755	2.36795	0.801724	3.77054	1.29899	0	0	0	0	0	2.98084e-16	#NAME?	down	--	--	--	--	--	--	--	--	--	--	--	--
Gallus_gallus_newGene_17310	280	300	244	231	340	0	3	0	0	0	1.03225	1.12569	0.881466	0.682248	1.2421	0	0.003587	0	0	0	3.90864e-25	-8.54911	down	--	--	--	--	--	--	--	--	--	--	--	--
Gallus_gallus_newGene_17629	942	656	763	400	306	124	152	130	222	184	4.7708	4.41021	4.3775	1.64705	1.13599	0.501333	1.0598	0.547869	1.7489	1.28565	0.0325575	-1.4028	down	--	--	--	--	--	--	--	--	--	--	--	uncharacterized protein LOC104689428 isoform X1 [Corvus cornix cornix]
Gallus_gallus_newGene_17711	233	130	258	108	307	29	32	28	29	39	1.70224	0.930623	1.58812	0.563844	1.99917	0.210519	0.171581	0.170913	0.211829	0.244644	0.000903133	-2.25023	down	--	--	--	--	--	--	--	--	--	--	--	--
Gallus_gallus_newGene_18218	285	269	289	245	379	36	30	35	41	74	2.86079	3.27126	2.82374	2.24116	3.82055	0.326906	0.285815	0.370196	0.439977	0.714334	0.000100984	-2.28789	down	--	--	--	--	--	--	--	--	--	--	--	--
Gallus_gallus_newGene_18494	86	101	122	102	89	199	239	219	165	178	0.365524	0.47519	0.793621	0.683494	0.516982	1.35375	1.10868	0.902921	1.18177	0.734948	0.0163637	1.51626	up	--	--	Molecular Function: RNA binding (GO:0003723);; Molecular Function: RNA-directed DNA polymerase activity (GO:0003964);; Biological Process: RNA-dependent DNA biosynthetic process (GO:0006278);; Molecular Function: kinase activity (GO:0016301);; Biological Process: phosphorylation (GO:0016310);;	--	--	--	--	--	--	S	Function unknown	PREDICTED: LOW QUALITY PROTEIN: uncharacterized protein LOC109365375 [Meleagris gallopavo]
Gallus_gallus_newGene_19138	3287	2267	3107	2691	2859	552	175	244	273	330	8.70569	7.70997	7.18421	7.21877	6.87957	2.27917	0.398426	0.643419	0.859325	1.18229	4.06637e-22	-2.62667	down	--	--	--	--	--	[R]	General function prediction only	--	--	S	Function unknown	hypothetical protein llap_10261 [Limosa lapponica baueri]
Gallus_gallus_newGene_19444	990	1221	1357	5351	1274	0	0	0	0	0	17.5722	19.766	21.7191	75.1415	22.1666	0	0	0	0	0	3.96499e-10	#NAME?	down	--	--	--	--	--	--	--	--	--	--	--	--
Gallus_gallus_newGene_19450	179	117	177	105	157	0	0	5	0	0	0.469808	0.330867	0.569998	0.217072	0.583951	0	0	0.010644	0	0	6.3914e-17	-6.71483	down	--	--	--	--	--	--	--	--	--	--	--	--
Gallus_gallus_newGene_19486	0	0	0	0	0	339	400	285	226	214	0	0	0	0	0	0.985133	0.853254	0.69813	0.657836	0.523394	8.40105e-39	Inf	up	--	--	--	--	--	--	--	--	--	--	--	PREDICTED: uncharacterized protein LOC104914309 isoform X2 [Meleagris gallopavo]
Gallus_gallus_newGene_19713	77	39	44	121	86	241	819	234	173	178	0.093264	0.043234	0.047856	0.116166	0.102361	0.34749	0.866835	0.284278	0.249257	0.215388	0.0348334	2.62686	up	--	--	--	--	--	--	--	--	--	S	Function unknown	PREDICTED: LOW QUALITY PROTEIN: RNA-directed DNA polymerase from mobile element jockey-like, partial [Struthio camelus australis]
Gallus_gallus_newGene_1992	198	198	379	142	246	297	790	414	504	461	0.460995	0.273816	0.751457	0.320428	0.772347	0.665503	1.2497	0.616628	1.08012	0.794893	0.000341704	1.56776	up	--	--	--	--	--	--	--	--	--	S	Function unknown	reverse transcriptase, partial [Gallus gallus]
Gallus_gallus_newGene_20049	10865	12710	12132	13585	9488	22006	32389	33674	25293	26989	315.871	336.791	317.452	312.245	269.488	754.248	815.266	973.964	866.954	777.887	7.64548e-08	1.7683	up	[G]	Carbohydrate transport and metabolism	Molecular Function: triose-phosphate isomerase activity (GO:0004807);; Cellular Component: extracellular space (GO:0005615);; Cellular Component: nucleus (GO:0005634);; Cellular Component: cytosol (GO:0005829);; Biological Process: gluconeogenesis (GO:0006094);; Biological Process: glycolytic process (GO:0006096);; Biological Process: pentose-phosphate shunt (GO:0006098);; Biological Process: mul…	K01803|2.33757e-77|gga:396435|K01803 triosephosphate isomerase (TIM) [EC:5.3.1.1] | (RefSeq) TPI1; triosephosphate isomerase 1	Glycolysis / Gluconeogenesis (ko00010);; Fructose and mannose metabolism (ko00051);; Inositol phosphate metabolism (ko00562);; Carbon metabolism (ko01200);; Biosynthesis of amino acids (ko01230)	[G]	Carbohydrate transport and metabolism	Triosephosphate isomerase	Triosephosphate isomerase OS=Gallus gallus OX=9031 GN=TPI1 PE=1 SV=2	G	Carbohydrate transport and metabolism	hypothetical protein ASZ78_000773 [Callipepla squamata]
Gallus_gallus_newGene_20261	74	78	63	95	59	12	0	20	10	31	0.833519	0.797075	0.632375	0.844752	0.643282	0.156574	0	0.2227	0.12811	0.34502	0.0122576	-1.84578	down	--	--	--	--	--	--	--	--	--	--	--	--
Gallus_gallus_newGene_2075	73	5	22	19	46	72	112	70	66	98	0.116174	0.005991	0.031011	0.023369	0.072272	0.136106	0.545938	0.110933	0.125213	0.302842	0.00900091	1.76567	up	--	--	Molecular Function: RNA binding (GO:0003723);; Molecular Function: RNA-directed DNA polymerase activity (GO:0003964);; Biological Process: RNA-dependent DNA biosynthetic process (GO:0006278);;	--	--	--	--	--	--	S	Function unknown	hypothetical protein AS27_14818, partial [Aptenodytes forsteri]
Gallus_gallus_newGene_21022	2520	2249	2955	2228	2560	3775	4488	3551	3245	3759	29.3125	22.9867	30.3065	20.2559	29.0984	51.831	45.2819	40.4423	50.4554	43.0219	0.000287871	1.09094	up	--	--	Molecular Function: protein serine/threonine kinase activity (GO:0004674);; Molecular Function: ATP binding (GO:0005524);; Biological Process: protein phosphorylation (GO:0006468);;	K08868|9.80525e-170|gga:768936|K08868 alpha-kinase | (RefSeq) ALPK3; alpha kinase 3	--	--	--	--	--	S	Function unknown	hypothetical protein CIB84_001062 [Bambusicola thoracicus]
Gallus_gallus_newGene_21069	69	29	61	10	83	132	281	362	100	84	1.35776	0.517216	1.08953	0.147538	1.60813	3.0825	4.85089	7.17674	2.34728	1.64502	0.0145074	2.36713	up	[G]	Carbohydrate transport and metabolism	Molecular Function: phosphorylase kinase activity (GO:0004689);; Molecular Function: calmodulin binding (GO:0005516);; Cellular Component: phosphorylase kinase complex (GO:0005964);; Biological Process: glycogen metabolic process (GO:0005977);; Biological Process: protein phosphorylation (GO:0006468);;	K07190|3.7361e-67|gga:415741|K07190 phosphorylase kinase alpha/beta subunit | (RefSeq) PHKB; phosphorylase kinase regulatory subunit beta	Calcium signaling pathway (ko04020);; Insulin signaling pathway (ko04910)	[G]	Carbohydrate transport and metabolism	--	Phosphorylase b kinase regulatory subunit alpha, liver isoform OS=Takifugu rubripes OX=31033 GN=phka2 PE=3 SV=1	T	Signal transduction mechanisms	PREDICTED: phosphorylase b kinase regulatory subunit beta-like, partial [Chlamydotis macqueenii]
Gallus_gallus_newGene_21346	81	93	92	70	74	293	426	414	337	437	0.557393	0.370354	0.283726	0.195519	0.35636	1.81781	2.16813	2.47084	2.42367	2.53291	1.56583e-08	2.70906	up	--	--	--	--	--	--	--	--	--	--	--	--
Gallus_gallus_newGene_21552	44	0	3	123	94	131	75	74	105	128	0.500045	0	0.021049	1.10746	1.04218	1.76267	0.74111	0.840017	1.40766	1.45124	0.0464865	1.50403	up	--	--	Molecular Function: RNA binding (GO:0003723);; Molecular Function: RNA-directed DNA polymerase activity (GO:0003964);; Biological Process: RNA-dependent DNA biosynthetic process (GO:0006278);;	--	--	--	--	--	--	S	Function unknown	hypothetical protein N339_04974, partial [Pterocles gutturalis]
Gallus_gallus_newGene_21613	0	0	0	0	0	4708	9119	5973	5127	3498	0	0	0	0	0	55.6147	62.0555	55.6236	55.7813	32.7745	1.41146e-70	Inf	up	--	--	--	--	--	--	--	Immunoglobulin I-set domain	--	S	Function unknown	PREDICTED: immunoglobulin-like and fibronectin type III domain-containing protein 1 isoform X47 [Gallus gallus]
Gallus_gallus_newGene_21617	0	0	0	0	0	387	549	1138	939	635	0	0	0	0	0	14.5012	15.2481	28.9055	26.9664	17.3385	8.07195e-26	Inf	up	--	--	--	--	--	--	--	--	--	--	--	PREDICTED: immunoglobulin-like and fibronectin type III domain-containing protein 1 isoform X47 [Gallus gallus]
Gallus_gallus_newGene_21618	0	0	0	0	0	141	60	271	52	114	0	0	0	0	0	6.937	2.22663	11.7211	2.36799	4.59752	4.80851e-09	Inf	up	--	--	--	--	--	--	--	--	--	--	--	hypothetical protein AV530_004421 [Patagioenas fasciata monilis]
Gallus_gallus_newGene_23546	2266	2795	2435	3626	2379	4076	5059	4083	4444	4930	37.8307	42.5331	36.6012	47.8791	38.8191	80.2504	73.14	67.8359	87.5054	81.6163	2.38097e-05	1.26516	up	[M]	Cell wall/membrane/envelope biogenesis	Molecular Function: glycogen (starch) synthase activity (GO:0004373);; Biological Process: glycogen biosynthetic process (GO:0005978);;	K00693|8.64888e-83|shr:100920298|K00693 glycogen synthase [EC:2.4.1.11] | (RefSeq) GYS1; glycogen synthase 1	Starch and sucrose metabolism (ko00500);; PI3K-Akt signaling pathway (ko04151);; AMPK signaling pathway (ko04152);; Insulin signaling pathway (ko04910);; Glucagon signaling pathway (ko04922);; Insulin resistance (ko04931)	[G]	Carbohydrate transport and metabolism	Glycogen synthase;; Glycogen synthase	--	M	Cell wall/membrane/envelope biogenesis	PREDICTED: glycogen [starch] synthase, muscle-like [Salmo salar]
Gallus_gallus_newGene_23591	1132	1007	838	1554	416	291	160	299	173	449	44.4836	24.3711	19.4403	31.6922	10.4809	8.84953	3.56627	7.66606	5.8481	11.4802	0.00921492	-1.33451	down	--	--	Molecular Function: extracellular matrix structural constituent (GO:0005201);; Cellular Component: proteinaceous extracellular matrix (GO:0005578);; Cellular Component: collagen trimer (GO:0005581);; Molecular Function: metal ion binding (GO:0046872);;	--	--	[W]	Extracellular structures	Collagen triple helix repeat (20 copies)	Collagen alpha-1(I) chain OS=Gallus gallus OX=9031 GN=COL1A1 PE=1 SV=3	S	Function unknown	PREDICTED: LOW QUALITY PROTEIN: collagen alpha-1(I) chain-like, partial [Meleagris gallopavo]
Gallus_gallus_newGene_23643	80	40	85	70	124	115	248	127	97	173	1.45624	0.652714	1.37747	0.995158	2.19652	2.45784	3.89751	2.29185	2.07892	3.10905	0.0348334	1.3743	up	--	--	--	--	--	--	--	Serpentine type 7TM GPCR chemoreceptor Sri	--	--	--	--
Gallus_gallus_newGene_24150	54	59	49	138	146	3	6	7	11	7	0.990547	0.682135	0.55006	1.58734	1.34386	0.093892	0.147396	0.184759	0.381764	0.188799	0.000489713	-3.1767	down	--	--	--	--	--	--	--	--	--	S	Function unknown	major prion protein-like [Patagioenas fasciata monilis]
Gallus_gallus_newGene_24361	304	198	418	478	429	531	575	547	568	562	5.52367	2.41272	6.97717	7.66031	7.73092	10.0012	7.82916	9.18105	13.0492	11.4131	0.0130986	1.13498	up	--	--	--	--	--	--	--	--	--	S	Function unknown	PREDICTED: uncharacterized protein LOC106581609 [Salmo salar]
Gallus_gallus_newGene_24473	353	344	314	245	117	29	39	89	22	115	4.23239	3.13182	3.24462	2.56589	1.47542	0.389641	0.348618	1.16298	0.300619	1.39994	0.00555273	-1.78469	down	--	--	--	--	--	--	--	--	Myeloid-associated differentiation marker homolog OS=Xenopus laevis OX=8355 GN=myadm PE=2 SV=1	--	--	PREDICTED: myeloid-associated differentiation marker-like [Coturnix japonica]
Gallus_gallus_newGene_2464	3523	1797	768	591	2237	16	17	10	11	30	40.692	18.8471	7.96847	5.37695	25.2741	0.192299	0.155479	0.104394	0.138302	0.337702	1.23402e-05	-6.32652	down	--	--	--	--	--	--	--	--	--	--	--	--
Gallus_gallus_newGene_24651	1271	362	1479	526	1091	1570	1721	1660	1267	860	24.6659	6.40679	25.8468	8.06255	26.5272	35.9215	28.9223	32.058	28.9924	16.5531	0.0247812	1.08791	up	--	--	Molecular Function: voltage-gated sodium channel activity (GO:0005248);; Biological Process: sodium ion transport (GO:0006814);; Biological Process: movement of cell or subcellular component (GO:0006928);; Molecular Function: sodium channel regulator activity (GO:0017080);; Biological Process: neuron projection development (GO:0031175);; Biological Process: ion transmembrane transport (GO:0034220…	--	--	--	--	--	--	U	Intracellular trafficking, secretion, and vesicular transport	PREDICTED: sodium channel subunit beta-1-like [Pseudopodoces humilis]
Gallus_gallus_newGene_24723	289	176	279	371	220	733	577	554	515	430	16.7644	9.2927	14.5867	17.0159	12.4828	50.2311	29.0375	31.9959	35.2402	24.7443	0.000174629	1.62362	up	--	--	Cellular Component: nucleus (GO:0005634);; Molecular Function: oxidoreductase activity, acting on the CH-CH group of donors (GO:0016627);; Cellular Component: integral component of endoplasmic reticulum membrane (GO:0030176);; Biological Process: fatty acid elongation (GO:0030497);; Biological Process: very long-chain fatty acid biosynthetic process (GO:0042761);; Biological Process: oxidation-re…	K10258|4.58222e-43|fpg:101911436|K10258 very-long-chain enoyl-CoA reductase [EC:1.3.1.93] | (RefSeq) very-long-chain enoyl-CoA reductase-like	Fatty acid elongation (ko00062);; Biosynthesis of unsaturated fatty acids (ko01040);; Fatty acid metabolism (ko01212)	[I]	Lipid transport and metabolism	--	--	S	Function unknown	PREDICTED: uncharacterized protein LOC106899679 [Calidris pugnax]
Gallus_gallus_newGene_25030	7078	4231	8226	6594	4504	14580	19216	17153	13207	10564	110.523	60.2108	115.611	81.4062	68.7148	424.291	351.579	266.472	243.146	163.527	1.3163e-08	1.8099	up	[G]	Carbohydrate transport and metabolism	Biological Process: glycogen catabolic process (GO:0005980);; Molecular Function: glycogen phosphorylase activity (GO:0008184);; Molecular Function: pyridoxal phosphate binding (GO:0030170);; Cellular Component: apical part of cell (GO:0045177);; Cellular Component: perinuclear region of cytoplasm (GO:0048471);;	K00688|2.02693e-38|shr:100915891|K00688 glycogen phosphorylase [EC:2.4.1.1] | (RefSeq) PYGM; glycogen phosphorylase, muscle associated	Starch and sucrose metabolism (ko00500);; Insulin signaling pathway (ko04910);; Glucagon signaling pathway (ko04922);; Insulin resistance (ko04931)	[G]	Carbohydrate transport and metabolism	--	--	G	Carbohydrate transport and metabolism	PREDICTED: glycogen phosphorylase, liver form-like [Protobothrops mucrosquamatus]
Gallus_gallus_newGene_2517	15	20	22	17	13	306	432	449	133	101	0.365015	0.105449	0.110771	0.095173	0.067577	3.9518	3.02049	4.67416	1.38927	0.698888	1.43783e-06	4.54473	up	--	--	--	--	--	--	--	--	--	S	Function unknown	hypothetical protein llap_1601 [Limosa lapponica baueri]
Gallus_gallus_newGene_25321	15422	7510	19155	11660	13277	39036	47714	50136	42774	36673	1239.09	549.971	1385.24	740.691	1042.31	3697.82	3319.32	4007.85	4052.12	2921.28	2.3477e-11	2.20458	up	[G]	Carbohydrate transport and metabolism	Molecular Function: fructose-bisphosphate aldolase activity (GO:0004332);; Biological Process: glycolytic process (GO:0006096);;	K01623|1.482e-21|xla:379336|K01623 fructose-bisphosphate aldolase, class I [EC:4.1.2.13] | (RefSeq) aldoa.S, aldoa; aldolase, fructose-bisphosphate A S homeolog	Glycolysis / Gluconeogenesis (ko00010);; Pentose phosphate pathway (ko00030);; Fructose and mannose metabolism (ko00051);; Carbon metabolism (ko01200);; Biosynthesis of amino acids (ko01230)	[G]	Carbohydrate transport and metabolism	Fructose-bisphosphate aldolase class-I	Fructose-bisphosphate aldolase C-B OS=Danio rerio OX=7955 GN=aldocb PE=2 SV=1	G	Carbohydrate transport and metabolism	PREDICTED: fructose-bisphosphate aldolase A-like [Meleagris gallopavo]
Gallus_gallus_newGene_25927	38	172	111	117	65	191	434	216	175	614	0.281291	1.16147	0.735167	0.880986	0.42533	1.87655	3.37886	1.89678	2.17477	5.45147	0.000904876	2.15427	up	--	--	--	--	--	--	--	--	--	--	--	--
Gallus_gallus_newGene_27463	12	0	6	0	14	421	185	174	257	273	0.124165	0	0.064553	0	0.151751	5.59122	2.00791	1.82195	3.41108	3.11959	1.47116e-11	5.81968	up	--	--	--	K10408|9.33988e-14|amj:102564006|K10408 dynein heavy chain, axonemal | (RefSeq) DNAH11; dynein axonemal heavy chain 11	--	[Z]	Cytoskeleton	--	--	--	--	PREDICTED: dynein heavy chain 11, axonemal [Crocodylus porosus]
Gallus_gallus_newGene_27553	307	312	187	211	245	80	64	50	61	67	1.99761	1.84518	1.09434	1.08358	1.55705	0.60858	0.355698	0.319772	0.462301	0.431403	0.022881	-1.46166	down	--	--	--	--	--	--	--	--	--	--	--	--
Gallus_gallus_newGene_3245	150	107	169	114	164	762	508	622	245	362	0.340244	0.19976	0.281901	0.193749	0.325588	1.66408	0.849546	1.37066	0.496594	0.762447	0.000909599	2.34074	up	--	--	--	--	--	--	--	--	--	--	--	PREDICTED: uncharacterized protein LOC106896623 [Calidris pugnax]
Gallus_gallus_newGene_4019	554	55	390	70	1293	9	3	8	3	13	0.936256	0.048656	0.346234	0.053916	3.52194	0.009375	0.001718	0.007549	0.00234	0.035673	0.031336	-5.63082	down	--	--	--	K19403|1.41345e-22|cjo:107312137|K19403 microcephalin | (RefSeq) MCPH1; microcephalin 1	--	--	--	--	--	S	Function unknown	hypothetical protein N322_04765, partial [Cariama cristata]
Gallus_gallus_newGene_47	16	5	6	0	21	51	209	62	114	209	0.031331	0.007521	0.009172	0	0.041762	0.131049	0.379782	0.30201	0.752239	0.42154	3.33569e-07	4.10471	up	--	--	Molecular Function: RNA binding (GO:0003723);; Molecular Function: RNA-directed DNA polymerase activity (GO:0003964);; Molecular Function: ATP binding (GO:0005524);; Cellular Component: nucleoplasm (GO:0005654);; Cellular Component: nucleolus (GO:0005730);; Cellular Component: Golgi stack (GO:0005795);; Biological Process: RNA-dependent DNA biosynthetic process (GO:0006278);; Biological Process: …	--	--	--	--	Transposase (partial DDE domain)	--	S	Function unknown	uncharacterized protein LOC110391435 [Numida meleagris]
Gallus_gallus_newGene_5686	10	14	11	7	14	61	203	99	53	82	0.136772	0.193207	0.1623	0.073256	0.1997	1.26304	3.36628	1.88405	1.11169	1.99658	9.39507e-06	3.58571	up	--	--	--	--	--	--	--	--	--	--	--	--
Gallus_gallus_newGene_6113	11672	27718	36379	9774	26685	29140	51860	40022	19023	25436	67.5814	151.216	161.954	29.0194	168.955	160.755	270.594	243.322	115.392	138.126	0.0412321	1.0379	up	[C]	Energy production and conversion	Cellular Component: mitochondrial inner membrane (GO:0005743);; Biological Process: mitochondrial electron transport, ubiquinol to cytochrome c (GO:0006122);; Molecular Function: ubiquinol-cytochrome-c reductase activity (GO:0008121);; Molecular Function: electron carrier activity (GO:0009055);; Cellular Component: respiratory chain complex III (GO:0045275);; Molecular Function: metal ion binding…	K03883|0|gga:807642|K03883 NADH-ubiquinone oxidoreductase chain 5 [EC:1.6.5.3] | (RefSeq) ND5; NADH dehydrogenase subunit 5	Oxidative phosphorylation (ko00190)	[C]	Energy production and conversion	NADH dehydrogenase	NADH-ubiquinone oxidoreductase chain 5 OS=Gallus gallus OX=9031 GN=MT-ND5 PE=3 SV=1	C	Energy production and conversion	cytochrome b (mitochondrion) [Gallus gallus]
Gallus_gallus_newGene_7203	115	59	181	79	118	12	4	3	0	48	0.752594	0.706671	1.06826	0.405001	0.754599	0.0865	0.01736	0.013328	0	0.308888	0.000488076	-2.67667	down	--	--	--	--	--	--	--	--	--	--	--	--
gene1001	2798	2310	2860	2906	2005	4366	5469	3666	3936	2786	27.3431	16.6075	22.4057	18.5308	15.676	46.1794	40.6179	25.0062	38.3916	21.8583	0.000231857	1.18101	up	[R]	General function prediction only	Molecular Function: receptor activity (GO:0004872);; Cellular Component: integral component of membrane (GO:0016021);; Molecular Function: identical protein binding (GO:0042802);; Molecular Function: protein heterodimerization activity (GO:0046982);;	K07297|0|apla:101790569|K07297 adiponectin receptor | (RefSeq) ADIPOR2; adiponectin receptor 2	Adipocytokine signaling pathway (ko04920)	[RT]	General function prediction only;; Signal transduction mechanisms	Haemolysin-III related	Membrane progestin receptor alpha GN=mpra OS=Cynoscion nebulosus (Spotted seatrout) PE=1 SV=1	T	Signal transduction mechanisms	PREDICTED: adiponectin receptor protein 2 isoform X1 [Anas platyrhynchos]
gene10010	433	861	809	636	497	2567	4738	3195	2711	2411	1.87525	3.40336	3.15738	2.18199	2.10353	13.1608	17.8424	13.9425	14.064	10.3708	2.84144e-17	2.7842	up	--	--	Biological Process: response to hypoxia (GO:0001666);; Molecular Function: iron ion binding (GO:0005506);; Cellular Component: nucleus (GO:0005634);; Cellular Component: cytoplasm (GO:0005737);; Biological Process: activation of cysteine-type endopeptidase activity involved in apoptotic process (GO:0006919);; Biological Process: protein hydroxylation (GO:0018126);; Biological Process: peptidyl-pr…	K09592|1.17082e-177|phi:102112105|K09592 hypoxia-inducible factor prolyl hydroxylase [EC:1.14.11.29] | (RefSeq) EGLN3; egl-9 family hypoxia inducible factor 3	--	[T]	Signal transduction mechanisms	2OG-Fe(II) oxygenase superfamily;; 2OG-Fe(II) oxygenase superfamily	--	T	Signal transduction mechanisms	PREDICTED: egl nine homolog 3 isoform X2 [Gallus gallus]
gene1004	174	109	347	139	298	3	2	7	3	5	1.13466	0.63481	2.03316	0.716102	1.86122	0.014808	0.010404	0.037541	0.014809	0.028274	6.37324e-09	-5.24565	down	--	--	--	--	--	[R]	General function prediction only	Leucine rich repeat;; Leucine Rich repeats (2 copies);; Leucine rich repeat N-terminal domain;; Leucine rich repeats (6 copies);; Leucine rich repeat;; Leucine Rich Repeat	Peroxidasin (Precursor) GN=pxdn OS=Xenopus tropicalis (Western clawed frog) PE=2 SV=1	T	Signal transduction mechanisms	PREDICTED: leucine-rich repeat and transmembrane domain-containing protein 2 isoform X2 [Gallus gallus]
gene10059	77	58	91	72	48	15	15	17	8	25	0.426133	0.28866	0.629493	0.313742	0.491107	0.093297	0.068483	0.090032	0.049042	0.134687	0.0335579	-1.63548	down	--	--	Cellular Component: Golgi apparatus (GO:0005794);; Biological Process: response to biotic stimulus (GO:0009607);; Cellular Component: integral component of membrane (GO:0016021);;	--	--	--	--	Interferon-induced transmembrane protein	Synapse differentiation-inducing gene protein 1-like GN=syndig1l OS=Danio rerio (Zebrafish) PE=3 SV=1	S	Function unknown	PREDICTED: synapse differentiation inducing 1-like [Gallus gallus]
gene10074	8127	5781	7283	3164	6874	11636	14683	10701	7437	8389	30.8762	20.015	24.9013	9.50555	25.5135	52.1225	48.3009	40.4431	33.3141	31.6014	0.000198678	1.23632	up	[RTKL]	General function prediction only;; Signal transduction mechanisms;; Transcription;; Replication, recombination and repair	Molecular Function: protein serine/threonine kinase activity (GO:0004674);; Molecular Function: ATP binding (GO:0005524);; Cellular Component: mitochondrion (GO:0005739);; Molecular Function: protein kinase binding (GO:0019901);;	K20878|0|gga:428891|K20878 NIMA (never in mitosis gene a)-related kinase 9 [EC:2.7.11.1] | (RefSeq) NEK9; NIMA related kinase 9	--	[S]	Function unknown	Protein kinase domain;; Regulator of chromosome condensation (RCC1) repeat;; Protein tyrosine kinase;; Regulator of chromosome condensation (RCC1) repeat;; Avian adenovirus fibre	Serine/threonine-protein kinase Nek9 GN=nek9 OS=Xenopus laevis (African clawed frog) PE=2 SV=1	R	General function prediction only	PREDICTED: serine/threonine-protein kinase Nek9 isoform X1 [Gallus gallus]
gene1009	1869	1507	223	2142	2045	2455	3140	2553	2005	2151	9.54438	6.86718	0.765102	6.98517	10.6542	15.7616	11.3082	10.5391	12.5546	8.82636	0.000284321	1.15223	up	[G]	Carbohydrate transport and metabolism	Cellular Component: mitochondrion (GO:0005739);;	--	--	[R]	General function prediction only	Haloacid dehalogenase-like hydrolase;; HAD-hyrolase-like	--	R	General function prediction only	PREDICTED: cat eye syndrome critical region protein 5 isoform X5 [Gallus gallus]
gene10097	1087	1358	1765	1103	1908	322	304	290	519	666	5.59011	5.99479	7.38004	3.70126	9.01096	2.28218	1.26817	1.17922	2.98057	3.43529	0.00171517	-1.28275	down	--	--	Cellular Component: membrane (GO:0016020);;	--	--	[R]	General function prediction only	Domain of unknown function DUF221;; Domain of unknown function (DUF4463);; Late exocytosis, associated with Golgi transport	--	S	Function unknown	PREDICTED: transmembrane protein 63C isoform X2 [Gallus gallus]
gene10243	97	101	128	100	194	340	342	221	225	379	0.652763	0.595324	0.837252	0.499526	1.48823	2.93685	2.30278	1.93844	2.0542	3.0163	0.000809952	1.76069	up	--	--	--	--	--	--	--	Protein incorporated later into Tight Junctions	--	S	Function unknown	PREDICTED: brain-enriched guanylate kinase-associated protein isoform X2 [Corvus cornix cornix]
gene10245	408	378	924	569	512	110	95	107	121	262	5.1243	3.80329	6.56175	4.93661	4.59094	0.782208	1.1912	1.5565	1.65227	3.83411	0.00249936	-1.5116	down	--	--	Molecular Function: calcium ion binding (GO:0005509);; Biological Process: post-embryonic development (GO:0009791);; Cellular Component: external side of plasma membrane (GO:0009897);; Biological Process: negative regulation of Notch signaling pathway (GO:0045746);; Biological Process: embryonic skeletal system development (GO:0048706);;	--	--	[T]	Signal transduction mechanisms	EGF-like domain;; Human growth factor-like EGF;; EGF-like domain	Delta-like protein B (Precursor) GN=dlb OS=Danio rerio (Zebrafish) PE=1 SV=1	T	Signal transduction mechanisms	protein delta homolog 1 precursor [Gallus gallus]
gene1029	9845	10635	9930	10421	7839	89372	124695	111693	79231	66518	49.1814	48.593	44.77	41.3168	38.4319	521.529	536.247	549.991	463.778	328.435	1.19045e-28	3.79215	up	[G]	Carbohydrate transport and metabolism	Molecular Function: phosphoglycerate mutase activity (GO:0004619);; Biological Process: glycolytic process (GO:0006096);;	K01837|2.79567e-176|apla:101803151|K01837 bisphosphoglycerate/phosphoglycerate mutase [EC:5.4.2.4 5.4.2.11] | (RefSeq) BPGM; bisphosphoglycerate mutase	Glycolysis / Gluconeogenesis (ko00010);; Glycine, serine and threonine metabolism (ko00260)	[G]	Carbohydrate transport and metabolism	Histidine phosphatase superfamily (branch 1);; Reverse transcriptase (RNA-dependent DNA polymerase)	Phosphoglycerate mutase 1 OS=Gallus gallus (Chicken) PE=1 SV=3	G	Carbohydrate transport and metabolism	PREDICTED: bisphosphoglycerate mutase isoform X1 [Meleagris gallopavo]
gene10298	557	1128	1856	1742	834	2404	2683	3215	2591	3320	4.94582	9.22782	15.1535	12.5036	7.28091	25.7207	21.0424	29.0281	27.8467	29.7814	2.31241e-10	1.76162	up	--	--	--	--	--	--	--	Domain of unknown function (DUF4658);; Consortin C-terminus	--	S	Function unknown	PREDICTED: transmembrane protein C14orf180 homolog isoform X1 [Gallus gallus]
gene10332	551	224	370	764	603	135	135	123	74	123	1.47179	0.2589	0.727984	0.785897	0.932985	0.431379	0.194058	0.381917	0.140959	0.275998	0.00322971	-1.58606	down	--	--	Biological Process: negative regulation of phosphatase activity (GO:0010923);; Molecular Function: phosphatase binding (GO:0019902);;	K17575|0|gga:776144|K17575 protein phosphatase 1 regulatory subunit 36 | (RefSeq) PPP1R36, C14orf50; protein phosphatase 1 regulatory subunit 36	--	--	--	Protein phosphatase 1 inhibitor	--	T	Signal transduction mechanisms	PREDICTED: protein phosphatase 1 regulatory subunit 36 isoform X3 [Gallus gallus]
gene10337	359	339	339	494	393	904	672	313	568	911	3.782	3.36333	3.22972	4.17035	4.15473	11.1601	6.12532	3.25491	6.94946	9.60774	0.00900091	1.3253	up	--	--	Molecular Function: DNA binding (GO:0003677);; Cellular Component: nucleus (GO:0005634);; Cellular Component: cytoplasm (GO:0005737);; Biological Process: gene expression (GO:0010467);; Molecular Function: metal ion binding (GO:0046872);;	K10504|0|gga:423505|K10504 zinc finger and BTB domain-containing protein 25 | (RefSeq) ZBTB25; zinc finger and BTB domain containing 25	--	[R]	General function prediction only	BTB/POZ domain;; Zinc finger, C2H2 type;; C2H2-type zinc finger;; Zinc-finger double-stranded RNA-binding	Myoneurin GN=mynn OS=Xenopus laevis (African clawed frog) PE=2 SV=1	R	General function prediction only	PREDICTED: zinc finger and BTB domain-containing protein 25 isoform X5 [Gallus gallus]
gene10362	144	88	212	140	146	27	34	37	17	36	0.145839	0.081223	0.618354	0.399485	0.155728	0.031815	0.029217	0.0369	0.070023	0.0357	0.0115454	-1.79027	down	--	--	--	K19328|0|gga:423516|K19328 synaptotagmin-14/16 | (RefSeq) SYT16; synaptotagmin 16	--	[TU]	Signal transduction mechanisms;; Intracellular trafficking, secretion, and vesicular transport	C2 domain	Synaptotagmin-C GN=P65-C OS=Diplobatis ommata (Ocellated electric ray) PE=2 SV=1	TU	Signal transduction mechanisms;; Intracellular trafficking, secretion, and vesicular transport	PREDICTED: synaptotagmin-16 isoform X2 [Gallus gallus]
gene10369	58	114	119	76	186	996	1288	898	629	724	0.364152	0.664491	0.683889	0.382049	1.72818	13.0743	11.8819	9.40817	7.51274	7.16145	1.34327e-21	3.52096	up	[RTKL]	General function prediction only;; Signal transduction mechanisms;; Transcription;; Replication, recombination and repair	--	K18051|0|gga:423518|K18051 novel protein kinase C eta type [EC:2.7.11.13] | (RefSeq) PRKCH, RP11-47I22.4; protein kinase C eta	Vascular smooth muscle contraction (ko04270);; Tight junction (ko04530)	[T]	Signal transduction mechanisms	Protein kinase domain;; Protein tyrosine kinase;; Phorbol esters/diacylglycerol binding domain (C1 domain);; C2 domain;; Protein kinase C terminal domain;; Kinase-like	Protein kinase C beta type GN=prkcbb OS=Danio rerio (Zebrafish) PE=2 SV=1	T	Signal transduction mechanisms	PREDICTED: LOW QUALITY PROTEIN: protein kinase C eta type [Gallus gallus]
gene1037	1335	1206	1263	693	903	276	316	267	163	229	5.51154	4.54932	4.70868	2.25099	3.66017	1.33409	1.13436	1.09566	0.787212	0.921939	1.24282e-05	-1.62346	down	[R]	General function prediction only	Molecular Function: GTPase activity (GO:0003924);; Molecular Function: GTP binding (GO:0005525);; Biological Process: obsolete GTP catabolic process (GO:0006184);; Biological Process: small GTPase mediated signal transduction (GO:0007264);; Cellular Component: membrane (GO:0016020);;	K07855|4.93183e-131|mgp:100546692|K07855 Ras-related and estrogen-regulated growth inhibitor | (RefSeq) RERG; RAS like estrogen regulated growth inhibitor	--	[R]	General function prediction only	Ras family;; Miro-like protein;; ADP-ribosylation factor family	Ras-related protein Rap-1b (Precursor) GN=rap1b OS=Cyprinus carpio (Common carp) PE=2 SV=1	R	General function prediction only	PREDICTED: ras-related and estrogen-regulated growth inhibitor [Struthio camelus australis]
gene10380	1143	2492	1129	1763	1088	404	527	499	314	834	16.8382	35.5332	15.5207	21.6497	15.1687	7.42718	7.06637	7.62691	5.76042	12.4876	0.0436397	-1.08666	down	[IQR]	Lipid transport and metabolism;; Secondary metabolites biosynthesis, transport and catabolism;; General function prediction only	Molecular Function: oxidoreductase activity (GO:0016491);; Biological Process: oxidation-reduction process (GO:0055114);;	K11165|0|gga:423527|K11165 dehydrogenase/reductase SDR family member 7 [EC:1.1.-.-] | (RefSeq) DHRS7; dehydrogenase/reductase 7	--	[Q]	Secondary metabolites biosynthesis, transport and catabolism	short chain dehydrogenase;; Enoyl-(Acyl carrier protein) reductase;; KR domain	Dehydrogenase/reductase SDR family member 7B GN=dhrs7b OS=Xenopus tropicalis (Western clawed frog) PE=2 SV=1	Q	Secondary metabolites biosynthesis, transport and catabolism	PREDICTED: dehydrogenase/reductase SDR family member 7 [Gallus gallus]
gene10382	934	830	1055	889	879	294	191	363	256	374	3.38692	2.68276	3.42591	2.31888	2.97217	1.28465	0.589388	1.42196	0.996428	1.30396	0.00655434	-1.12163	down	--	--	--	--	--	[S]	Function unknown	Pecanex protein (C-terminus)	Pecanex-like protein 4 GN=pcnxl4 OS=Xenopus laevis (African clawed frog) PE=2 SV=1	S	Function unknown	PREDICTED: chromosome 5 open reading frame, human C14orf135 isoform X7 [Gallus gallus]
gene10408	43	15	152	64	30	274	140	228	153	428	0.13051	0.03987	0.417536	0.154893	0.0879	0.988658	0.36976	0.695601	0.551783	1.29958	4.55598e-05	2.5367	up	--	--	--	--	--	--	--	--	--	S	Function unknown	PREDICTED: uncharacterized protein C14orf37 isoform X6 [Gallus gallus]
gene10537	32	48	71	87	0	46	102	68	101	149	0.698865	0.968963	1.40838	1.52802	0	1.19644	1.94496	1.49109	2.6361	3.27342	0.0449182	1.51245	up	--	--	--	--	--	--	--	--	--	--	--	--
gene10660	139	193	50	364	72	352	459	397	605	331	1.98813	2.74209	0.634143	4.09159	0.805598	5.32466	4.31629	4.00254	8.82598	5.01286	0.000750312	1.9798	up	--	--	--	--	--	--	--	Synuclein	Alpha-synuclein GN=SNCA OS=Serinus canaria (Island canary) PE=2 SV=1	Z	Cytoskeleton	PREDICTED: gamma-synuclein, partial [Alligator mississippiensis]
gene1067	3238	2605	3817	2694	2670	5571	6405	6495	7764	4604	7.80764	5.72398	8.28474	5.13501	6.28887	15.838	13.3729	15.5817	22.0739	11.0071	3.84974e-05	1.57489	up	[EH]	Amino acid transport and metabolism;; Coenzyme transport and metabolism	Cellular Component: mitochondrion (GO:0005739);; Cellular Component: cytosol (GO:0005829);; Biological Process: branched-chain amino acid biosynthetic process (GO:0009082);; Biological Process: branched-chain amino acid catabolic process (GO:0009083);; Molecular Function: L-leucine transaminase activity (GO:0052654);; Molecular Function: L-valine transaminase activity (GO:0052655);; Molecular Fun…	K00826|0|gga:418193|K00826 branched-chain amino acid aminotransferase [EC:2.6.1.42] | (RefSeq) BCAT1; branched chain amino acid transaminase 1	Cysteine and methionine metabolism (ko00270);; Valine, leucine and isoleucine degradation (ko00280);; Valine, leucine and isoleucine biosynthesis (ko00290);; Pantothenate and CoA biosynthesis (ko00770);; 2-Oxocarboxylic acid metabolism (ko01210);; Biosynthesis of amino acids (ko01230)	[E]	Amino acid transport and metabolism	Aminotransferase class IV	--	E	Amino acid transport and metabolism	PREDICTED: branched-chain-amino-acid aminotransferase, cytosolic isoform X2 [Gallus gallus]
gene10683	1188	1102	128	656	676	48	48	8	12	14	4.53144	2.66039	0.303593	2.29055	2.18901	0.373296	0.186894	0.018552	0.029773	0.131721	3.58884e-05	-4.36355	down	--	--	--	K05457|0|gga:428937|K05457 neuregulin 3 | (RefSeq) NRG3; neuregulin 3	ErbB signaling pathway (ko04012)	--	--	Neuregulin family	Neuregulin-1 (Precursor) GN=NRG1 OS=Gallus gallus (Chicken) PE=1 SV=1	T	Signal transduction mechanisms	PREDICTED: pro-neuregulin-3, membrane-bound isoform [Gallus gallus]
gene10692	873	597	973	1343	630	1069	1626	1345	1344	954	8.65705	5.3953	8.68587	10.5348	6.10473	12.5032	13.966	13.2687	15.717	9.3779	0.00201793	1.06378	up	[H]	Coenzyme transport and metabolism	Molecular Function: methionine adenosyltransferase activity (GO:0004478);; Molecular Function: ATP binding (GO:0005524);; Biological Process: S-adenosylmethionine biosynthetic process (GO:0006556);; Biological Process: one-carbon metabolic process (GO:0006730);; Molecular Function: metal ion binding (GO:0046872);;	K00789|0|gga:423628|K00789 S-adenosylmethionine synthetase [EC:2.5.1.6] | (RefSeq) MAT1A; methionine adenosyltransferase 1A	Cysteine and methionine metabolism (ko00270);; Biosynthesis of amino acids (ko01230)	[H]	Coenzyme transport and metabolism	S-adenosylmethionine synthetase, C-terminal domain;; S-adenosylmethionine synthetase, central domain;; S-adenosylmethionine synthetase, N-terminal domain	--	H	Coenzyme transport and metabolism	S-adenosylmethionine synthase isoform type-1 [Gallus gallus]
gene10703	535	1129	1165	1046	769	141	62	273	168	349	2.21579	3.21878	3.07037	2.59147	2.24514	0.437344	0.151532	0.715465	0.521124	1.54403	1.24282e-05	-1.71429	down	[RTKL]	General function prediction only;; Signal transduction mechanisms;; Transcription;; Replication, recombination and repair	--	K05126|0|apla:101803164|K05126 proto-oncogene tyrosine-protein kinase Ret [EC:2.7.10.1] | (RefSeq) RET; ret proto-oncogene	Endocytosis (ko04144)	[T]	Signal transduction mechanisms	Protein tyrosine kinase;; Protein kinase domain;; Cadherin domain	Fibroblast growth factor receptor 2 (Precursor) GN=FGFR2 OS=Notophthalmus viridescens (Eastern newt) PE=2 SV=1	T	Signal transduction mechanisms	PREDICTED: proto-oncogene tyrosine-protein kinase receptor Ret [Meleagris gallopavo]
gene10738	3282	4103	3978	3798	2770	4419	5267	5979	4649	5462	37.8162	43.0888	41.258	34.6002	31.1801	60.025	52.5426	68.5451	63.1639	62.3927	0.00121003	1.03826	up	--	--	--	K21246|0|gga:423656|K21246 nuclear receptor-binding factor 2 | (RefSeq) NRBF2, RBF-2; nuclear receptor binding factor 2	--	--	--	Domain of unknown function (DUF1875)	--	K	Transcription	nuclear receptor-binding factor 2 [Gallus gallus]
gene10755	3858	4087	4389	4275	3615	5738	6529	6179	5383	5631	15.4858	14.7786	15.7555	14.8748	13.9568	31.6315	25.4009	28.434	26.9892	24.4067	0.00118814	1.05981	up	--	--	--	K09288|0|gga:423666|K09288 coiled-coil domain-containing protein 6 | (RefSeq) CCDC6; coiled-coil domain containing 6	--	[S]	Function unknown	Uncharacterized conserved protein H4 (DUF2046)	--	S	Function unknown	coiled-coil domain-containing protein 6 [Gallus gallus]
gene10757	264	582	330	352	156	1352	1700	1323	1207	862	1.98913	4.20917	2.11074	2.09975	1.23392	12.4976	11.5434	10.294	11.4381	6.68699	1.56205e-12	2.47542	up	[GEPR]	Carbohydrate transport and metabolism;; Amino acid transport and metabolism;; Inorganic ion transport and metabolism;; General function prediction only	Cellular Component: plasma membrane (GO:0005886);; Molecular Function: symporter activity (GO:0015293);; Cellular Component: integral component of membrane (GO:0016021);; Biological Process: transmembrane transport (GO:0055085);;	K08186|0|gga:423667|K08186 MFS transporter, MCP family, solute carrier family 16 (monocarboxylic acid transporters), member 9 | (RefSeq) SLC16A9; solute carrier family 16 member 9	--	[G]	Carbohydrate transport and metabolism	Major Facilitator Superfamily	Monocarboxylate transporter 9 GN=SLC16A9 OS=Gallus gallus (Chicken) PE=2 SV=1	G	Carbohydrate transport and metabolism	monocarboxylate transporter 9 [Gallus gallus]
gene1084	4256	4986	3816	4622	8664	781	1340	1340	992	1893	63.485	67.7937	51.2369	54.5156	126.285	13.7197	17.2973	19.8759	17.4467	27.9936	0.0100326	-1.60501	down	[C]	Energy production and conversion	Molecular Function: L-lactate dehydrogenase activity (GO:0004459);; Molecular Function: structural constituent of eye lens (GO:0005212);; Cellular Component: cytosol (GO:0005829);; Biological Process: pyruvate metabolic process (GO:0006090);; Biological Process: glycolytic process (GO:0006096);; Biological Process: cellular carbohydrate metabolic process (GO:0044262);; Biological Process: oxidati…	K00016|0|gga:373997|K00016 L-lactate dehydrogenase [EC:1.1.1.27] | (RefSeq) LDHB; lactate dehydrogenase B	Glycolysis / Gluconeogenesis (ko00010);; Cysteine and methionine metabolism (ko00270);; Pyruvate metabolism (ko00620);; Propanoate metabolism (ko00640)	[C]	Energy production and conversion	lactate/malate dehydrogenase, NAD binding domain;; lactate/malate dehydrogenase, alpha/beta C-terminal domain;; Family 4 glycosyl hydrolase	L-lactate dehydrogenase B chain GN=LDHB OS=Gallus gallus (Chicken) PE=1 SV=3	C	Energy production and conversion	L-lactate dehydrogenase B chain [Gallus gallus]
gene10840	10861	6181	5750	8626	6205	2390	2870	1234	1656	2942	150.379	78.0002	71.6532	94.4272	83.9323	38.9986	34.4024	16.9857	27.0299	40.3725	0.00346228	-1.28316	down	--	--	Cellular Component: cytoplasm (GO:0005737);; Biological Process: response to stress (GO:0006950);; Biological Process: negative regulation of signal transduction (GO:0009968);; Biological Process: intracellular signal transduction (GO:0035556);; Biological Process: cellular metabolic process (GO:0044237);;	K08270|4.85285e-72|phi:102100098|K08270 DNA-damage-inducible transcript 4 | (RefSeq) DDIT4; DNA damage inducible transcript 4	mTOR signaling pathway (ko04150)	--	--	RTP801 C-terminal region	DNA damage-inducible transcript 4 protein GN=ddit4 OS=Xenopus tropicalis (Western clawed frog) PE=2 SV=1	T	Signal transduction mechanisms	PREDICTED: DNA damage-inducible transcript 4 protein [Pseudopodoces humilis]
gene10879	447	900	560	666	546	110	150	97	137	230	2.96223	5.35284	3.29018	3.43553	3.41791	0.828042	0.829193	0.614154	1.02722	1.45793	0.000608099	-1.61703	down	--	--	Molecular Function: transcription factor activity, RNA polymerase II transcription factor binding (GO:0001076);; Molecular Function: nucleic acid binding (GO:0003676);; Molecular Function: protein binding (GO:0005515);; Cellular Component: nucleus (GO:0005634);; Biological Process: regulation of transcription, DNA-templated (GO:0006355);; Biological Process: hindbrain development (GO:0030902);; M…	--	--	--	--	NocA-like zinc-finger protein 1	Zinc finger protein 503 GN=znf503 OS=Danio rerio (Zebrafish) PE=1 SV=1	K	Transcription	PREDICTED: zinc finger protein 503 [Taeniopygia guttata]
gene10915	3044	4426	3087	3602	6055	836	1168	1124	1057	1414	18.7795	41.0102	17.4148	18.1363	49.7042	6.70515	11.1607	11.2517	7.98853	15.8862	0.0039588	-1.37341	down	--	--	--	--	--	[TZ]	Signal transduction mechanisms;; Cytoskeleton	PDZ domain (Also known as DHR or GLGF);; LIM domain	PDZ and LIM domain protein 3 GN=pdlim3 OS=Xenopus laevis (African clawed frog) PE=2 SV=1	TZ	Signal transduction mechanisms;; Cytoskeleton	PREDICTED: PDZ and LIM domain protein 1 isoform X1 [Meleagris gallopavo]
gene10926	3122	3611	3018	3483	2829	4611	6691	4373	4098	3637	15.7176	16.5844	13.6845	13.8695	13.8562	27.3684	29.1458	21.9159	24.303	17.944	0.000812078	1.05468	up	--	--	--	--	--	[Y]	Nuclear structure	SRP40, C-terminal domain	--	Y	Nuclear structure	PREDICTED: nucleolar and coiled-body phosphoprotein 1 isoform X2 [Gallus gallus]
gene10929	10095	6899	8445	15329	8425	1567	1826	1923	2619	3580	97.1337	60.5054	73.1342	116.614	79.2041	17.7668	15.2049	18.4091	29.7112	34.1435	3.07495e-06	-1.57913	down	[K]	Transcription	Biological Process: lens morphogenesis in camera-type eye (GO:0002089);; Molecular Function: transcription factor activity, sequence-specific DNA binding (GO:0003700);; Cellular Component: nucleus (GO:0005634);; Biological Process: locomotory behavior (GO:0007626);; Biological Process: midbrain development (GO:0030901);; Molecular Function: sequence-specific DNA binding (GO:0043565);; Biological …	K09357|0|fpg:101924830|K09357 paired-like homeodomain transcription factor 3 | (RefSeq) PITX3; paired like homeodomain 3	--	[K]	Transcription	Homeobox domain;; OAR domain	Pituitary homeobox 3 GN=pitx3 OS=Xenopus laevis (African clawed frog) PE=2 SV=1	K	Transcription	PREDICTED: pituitary homeobox 3 [Opisthocomus hoazin]
gene10936	198	183	181	257	218	295	449	394	232	264	1.44968	1.35087	1.35224	1.125	2.36402	2.28678	3.13377	3.52757	1.99352	2.18582	0.038644	1.15634	up	--	--	Biological Process: G2/M transition of mitotic cell cycle (GO:0000086);; Molecular Function: ubiquitin-protein transferase activity (GO:0004842);; Cellular Component: cytoplasm (GO:0005737);; Biological Process: protein ubiquitination (GO:0016567);; Cellular Component: SCF ubiquitin ligase complex (GO:0019005);; Biological Process: positive regulation of BMP signaling pathway (GO:0030513);; Biolo…	K10281|0|gga:428951|K10281 F-box and leucine-rich repeat protein 15 | (RefSeq) FBXL15; F-box and leucine rich repeat protein 15	--	[R]	General function prediction only	--	F-box/LRR-repeat protein 15 GN=fbxl15 OS=Xenopus laevis (African clawed frog) PE=2 SV=1	R	General function prediction only	PREDICTED: F-box/LRR-repeat protein 15 isoform X3 [Gallus gallus]
gene10937	964	1120	1047	1137	1053	1490	1817	1596	927	1779	14.3366	15.1332	13.8341	13.166	15.1021	26.1066	23.3572	23.7907	15.9338	26.3919	0.001235	1.00312	up	--	--	Cellular Component: nucleus (GO:0005634);; Cellular Component: cytoplasm (GO:0005737);;	--	--	--	--	--	CUE domain-containing protein 2-A GN=cuedc2-a OS=Xenopus laevis (African clawed frog) PE=1 SV=1	S	Function unknown	CUE domain-containing protein 2 isoform 1 [Gallus gallus]
gene10986	10913	3791	10815	8714	9667	2989	3402	2300	1408	2545	45.2546	11.4549	38.2736	21.3224	37.552	12.2751	10.6442	7.58407	5.41801	7.80497	0.00709431	-1.31146	down	--	--	Biological Process: branching involved in blood vessel morphogenesis (GO:0001569);; Biological Process: ameboidal-type cell migration (GO:0001667);; Cellular Component: extracellular region (GO:0005576);; Biological Process: immune response (GO:0006955);; Biological Process: germ cell development (GO:0007281);; Biological Process: brain development (GO:0007420);; Molecular Function: chemokine act…	K10031|4.39642e-73|phi:102100846|K10031 C-X-C motif chemokine 12 | (RefSeq) CXCL12; C-X-C motif chemokine ligand 12	Cytokine-cytokine receptor interaction (ko04060);; Intestinal immune network for IgA production (ko04672)	--	--	Small cytokines (intecrine/chemokine), interleukin-8 like	Stromal cell-derived factor 1 {ECO:0000250|UniProtKB:P48061} (Precursor) GN=cxcl12 OS=Xenopus laevis (African clawed frog) PE=2 SV=1	T	Signal transduction mechanisms	PREDICTED: stromal cell-derived factor 1 [Meleagris gallopavo]
gene10995	8967	15868	9572	18873	6654	3057	5687	4179	3219	4212	67.1052	107.779	65.4705	112.602	48.8908	27.5151	37.8184	32.6211	30.5152	31.7065	0.023187	-1.04169	down	[Z]	Cytoskeleton	Molecular Function: ATP binding (GO:0005524);; Biological Process: obsolete ATP catabolic process (GO:0006200);; Biological Process: apoptotic process (GO:0006915);; Molecular Function: ATPase activity (GO:0016887);; Molecular Function: myosin binding (GO:0017022);; Biological Process: skeletal muscle thin filament assembly (GO:0030240);; Cellular Component: I band (GO:0031674);; Biological Proce…	K12313|0|umr:103661931|K12313 actin, aortic smooth muscle | (RefSeq) ACTA2; actin, alpha 2, smooth muscle, aorta	Vascular smooth muscle contraction (ko04270)	[Z]	Cytoskeleton	Actin	Actin, aortic smooth muscle (Precursor) GN=ACTA2 OS=Gallus gallus (Chicken) PE=1 SV=2	Z	Cytoskeleton	actin, aortic smooth muscle [Gallus gallus]
gene11074	90	102	106	82	103	204	264	196	225	225	0.332777	0.351503	0.386465	0.239288	0.711605	0.816369	0.706465	0.618743	2.31296	1.84754	0.00383181	1.71006	up	--	--	Cellular Component: proteinaceous extracellular matrix (GO:0005578);; Biological Process: carbohydrate metabolic process (GO:0005975);; Cellular Component: membrane (GO:0016020);; Molecular Function: hydrolase activity, acting on glycosyl bonds (GO:0016798);; Molecular Function: heparan sulfate proteoglycan binding (GO:0043395);;	K07965|0|gga:423834|K07965 heparanase 2 [EC:3.2.1.-] | (RefSeq) HPSE2; heparanase 2 (inactive)	Glycosaminoglycan degradation (ko00531)	--	--	Glycosyl hydrolase family 79, N-terminal domain	Heparanase (Precursor) GN=HPSE OS=Gallus gallus (Chicken) PE=1 SV=1	G	Carbohydrate transport and metabolism	PREDICTED: inactive heparanase-2 isoform X8 [Gallus gallus]
gene11094	127980	171876	151942	170882	127196	357759	478887	434563	426164	435494	1550.11	1897.5	1656.42	1636.39	1505.23	5108.63	5021.97	5236.6	6085.81	5229.4	7.82104e-10	2.02656	up	[G]	Carbohydrate transport and metabolism	Molecular Function: bisphosphoglycerate mutase activity (GO:0004082);; Molecular Function: bisphosphoglycerate 2-phosphatase activity (GO:0004083);; Molecular Function: phosphoglycerate mutase activity (GO:0004619);; Cellular Component: cytosol (GO:0005829);; Biological Process: gluconeogenesis (GO:0006094);; Biological Process: glycolytic process (GO:0006096);; Biological Process: small molecule…	K01834|0|gga:428969|K01834 2,3-bisphosphoglycerate-dependent phosphoglycerate mutase [EC:5.4.2.11] | (RefSeq) PGAM1; phosphoglycerate mutase 1	Glycolysis / Gluconeogenesis (ko00010);; Glycine, serine and threonine metabolism (ko00260);; Carbon metabolism (ko01200);; Biosynthesis of amino acids (ko01230)	[G]	Carbohydrate transport and metabolism	Histidine phosphatase superfamily (branch 1)	Phosphoglycerate mutase 1 OS=Gallus gallus (Chicken) PE=1 SV=3	G	Carbohydrate transport and metabolism	phosphoglycerate mutase 1 [Gallus gallus]
gene11095	1935	1930	2510	3095	2699	3643	5332	5448	3908	6636	11.8609	8.0133	13.9798	15.8328	16.6872	31.8712	33.0676	35.6134	33.1502	34.3918	6.07529e-08	1.52802	up	--	--	Cellular Component: nucleolus (GO:0005730);; Cellular Component: integral component of membrane (GO:0016021);; Cellular Component: nuclear membrane (GO:0031965);;	K14794|0|gga:423845|K14794 ribosomal RNA-processing protein 12 | (RefSeq) RRP12; ribosomal RNA processing 12 homolog	--	[S]	Function unknown	NUC173 domain	RRP12-like protein GN=RRP12 OS=Gallus gallus (Chicken) PE=2 SV=1	A	RNA processing and modification	RRP12-like protein [Gallus gallus]
gene11108	246	259	231	487	240	419	446	255	445	536	4.93601	4.73589	4.17083	7.74298	4.70504	9.93647	7.76003	5.09103	10.5435	10.6744	0.0465932	1.05771	up	--	--	--	K11278|9.77567e-84|gga:770430|K11278 nucleophosmin 3 | (RefSeq) NPM3; nucleophosmin/nucleoplasmin 3	--	--	--	Nucleoplasmin	Nucleoplasmin-like protein NO29 OS=Xenopus laevis (African clawed frog) PE=2 SV=1	S	Function unknown	PREDICTED: nucleoplasmin-3 isoform X1 [Gallus gallus]
gene11167	212	93	203	181	196	27	49	53	26	25	0.405105	0.162508	0.348797	0.274257	0.365754	0.059601	0.080118	0.100165	0.057205	0.046244	0.00786779	-1.8086	down	--	--	Cellular Component: integral component of membrane (GO:0016021);;	--	--	[R]	General function prediction only	PKD domain	Sortilin-related receptor (Fragment) GN=SORL1 OS=Gallus gallus (Chicken) PE=2 SV=1	T	Signal transduction mechanisms	PREDICTED: VPS10 domain-containing receptor SorCS3 isoform X2 [Gallus gallus]
gene11178	667	1296	1391	1906	1120	5487	6927	5251	5994	5131	1.76343	3.27181	3.48569	4.00646	2.88952	16.2285	15.3114	13.5164	18.3768	13.4289	1.97868e-22	2.72307	up	--	--	--	--	--	--	--	RNA recognition motif. (a.k.a. RRM, RBD, or RNP domain);; RNA recognition motif (a.k.a. RRM, RBD, or RNP domain);; Zinc-finger double-stranded RNA-binding	--	R	General function prediction only	PREDICTED: RNA-binding protein 20 [Gallus gallus]
gene11190	2512	1001	3907	3443	4974	685	899	931	628	626	8.70298	3.18486	12.2138	9.32247	16.4689	2.8155	2.70744	3.24014	2.56857	2.03377	0.0291076	-1.56785	down	[I]	Lipid transport and metabolism	Molecular Function: glycerol-3-phosphate O-acyltransferase activity (GO:0004366);; Cellular Component: mitochondrial inner membrane (GO:0005743);; Biological Process: fatty acid metabolic process (GO:0006631);; Biological Process: acyl-CoA metabolic process (GO:0006637);; Biological Process: glycerophospholipid metabolic process (GO:0006650);; Biological Process: phospholipid biosynthetic process…	K00629|0|gga:423895|K00629 glycerol-3-phosphate O-acyltransferase 1/2 [EC:2.3.1.15] | (RefSeq) GPAM; glycerol-3-phosphate acyltransferase, mitochondrial	Glycerolipid metabolism (ko00561);; Glycerophospholipid metabolism (ko00564)	[I]	Lipid transport and metabolism	Acyltransferase	--	I	Lipid transport and metabolism	PREDICTED: glycerol-3-phosphate acyltransferase 1, mitochondrial isoform X5 [Gallus gallus]
gene11236	107	317	149	302	123	15	21	24	8	51	1.30209	3.74304	1.63533	2.94414	1.46307	0.192788	0.21529	0.29045	0.111491	0.612182	0.000363811	-2.61145	down	--	--	Molecular Function: transcription regulatory region sequence-specific DNA binding (GO:0000976);; Molecular Function: transcription factor activity, sequence-specific DNA binding (GO:0003700);; Cellular Component: nucleus (GO:0005634);; Biological Process: regulation of transcription, DNA-templated (GO:0006355);; Biological Process: anterior/posterior pattern specification (GO:0009952);; Biologica…	K09317|1.8796e-149|phi:102101083|K09317 homeobox protein EMX | (RefSeq) EMX2; empty spiracles homeobox 2	--	[K]	Transcription	Homeobox domain	Homeobox protein EMX1 GN=emx1 OS=Xenopus tropicalis (Western clawed frog) PE=2 SV=1	K	Transcription	PREDICTED: homeobox protein EMX2 isoform X2 [Gallus gallus]
gene11277	11106	13898	9245	9117	6519	2895	2534	3220	2429	6262	102.559	116.98	76.8375	66.5602	58.819	31.5096	20.255	29.5799	26.4432	57.3279	0.0118292	-1.05308	down	[O]	Posttranslational modification, protein turnover, chaperones	Biological Process: regulation of cell growth (GO:0001558);; Molecular Function: serine-type endopeptidase activity (GO:0004252);; Molecular Function: insulin-like growth factor binding (GO:0005520);; Cellular Component: extracellular region (GO:0005576);; Biological Process: proteolysis (GO:0006508);; Biological Process: negative regulation of transforming growth factor beta receptor signaling p…	K08784|0|tgu:100219623|K08784 HtrA serine peptidase 1 [EC:3.4.21.-] | (RefSeq) HTRA1; HtrA serine peptidase 1	--	[O]	Posttranslational modification, protein turnover, chaperones	Trypsin-like peptidase domain;; Trypsin;; PDZ domain;; PDZ domain (Also known as DHR or GLGF);; Kazal-type serine protease inhibitor domain;; Insulin-like growth factor binding protein;; Kazal-type serine protease inhibitor domain;; Peptidase S46	Serine protease HTRA1A (Precursor) GN=htra1a OS=Danio rerio (Zebrafish) PE=2 SV=1	W	Extracellular structures	PREDICTED: serine protease HTRA1 [Zonotrichia albicollis]
gene11287	1256	2977	3930	2572	1376	2644	5782	3476	2694	2526	5.49189	11.8762	15.4843	8.89699	5.88558	13.6443	21.9125	15.1364	13.9047	10.9582	0.0382238	1.01882	up	[I]	Lipid transport and metabolism	Molecular Function: acyl-CoA dehydrogenase activity (GO:0003995);; Molecular Function: flavin adenine dinucleotide binding (GO:0050660);;	K09478|0|gga:423947|K09478 short/branched chain acyl-CoA dehydrogenase [EC:1.3.99.12] | (RefSeq) ACADSB; acyl-CoA dehydrogenase, short/branched chain	Fatty acid degradation (ko00071);; Valine, leucine and isoleucine degradation (ko00280);; Fatty acid metabolism (ko01212)	[I]	Lipid transport and metabolism	Acyl-CoA dehydrogenase, C-terminal domain;; Acyl-CoA dehydrogenase, C-terminal domain;; Acyl-CoA dehydrogenase, N-terminal domain;; Acyl-CoA dehydrogenase, middle domain	--	I	Lipid transport and metabolism	short/branched chain specific acyl-CoA dehydrogenase, mitochondrial [Gallus gallus]
gene1141	314	534	369	691	415	654	828	1058	489	1009	2.81226	4.5322	3.12859	5.02528	3.88843	7.37079	6.84198	10.1635	5.50901	9.50381	0.000458705	1.29984	up	--	--	--	K20411|0|gga:418237|K20411 proline-rich protein 5 | (RefSeq) PRR5; proline rich 5	mTOR signaling pathway (ko04150)	--	--	HbrB-like	Proline-rich protein 5 GN=prr5 OS=Xenopus laevis (African clawed frog) PE=2 SV=1	R	General function prediction only	proline-rich protein 5 [Gallus gallus]
gene11472	228753	234758	211726	256574	121505	49043	56434	70513	45045	123476	844.826	790.177	703.719	748.556	437.984	213.709	180.242	259.259	196.094	451.543	0.00323846	-1.13662	down	--	--	Molecular Function: extracellular matrix structural constituent (GO:0005201);; Cellular Component: collagen trimer (GO:0005581);; Molecular Function: metal ion binding (GO:0046872);;	K19720|7.13233e-178|gga:396340|K19720 collagen, type III, alpha | (RefSeq) COL3A1, collagen; collagen type III alpha 1 chain	AGE-RAGE signaling pathway in diabetic complications (ko04933)	[W]	Extracellular structures	Collagen triple helix repeat (20 copies);; Fibrillar collagen C-terminal domain;; von Willebrand factor type C domain	Collagen alpha-1(III) chain (Precursor; Fragments) GN=COL3A1 OS=Gallus gallus (Chicken) PE=2 SV=2	W	Extracellular structures	RecName: Full=Collagen alpha-1(III) chain; Flags: Precursor, partial [Gallus gallus]
gene11474	1913	2407	2690	2602	2291	826	1064	728	546	715	9.47829	12.722	12.8816	12.0128	11.3467	4.41745	4.71676	3.10406	2.9505	3.14301	0.000247053	-1.11118	down	--	--	Cellular Component: cytoplasm (GO:0005737);; Biological Process: phagocytosis, engulfment (GO:0006911);;	--	--	[R]	General function prediction only	Phosphotyrosine interaction domain (PTB/PID);; Phosphotyrosine-binding domain;; Phosphotyrosine interaction domain (PTB/PID)	PTB domain-containing engulfment adapter protein 1 GN=gulp1 OS=Danio rerio (Zebrafish) PE=2 SV=1	R	General function prediction only	PREDICTED: PTB domain-containing engulfment adapter protein 1 isoform X10 [Gallus gallus]
gene11479	413	278	612	421	364	757	843	812	383	562	0.948446	0.581449	1.26648	0.766101	0.818346	2.05341	1.67854	1.85808	1.03726	1.28068	0.00356913	1.19373	up	--	--	--	--	--	--	--	Uncharacterised protein family UPF0560	Protein FAM171A1 (Precursor) GN=fam171a1 OS=Xenopus laevis (African clawed frog) PE=2 SV=1	S	Function unknown	PREDICTED: protein FAM171B isoform X3 [Gallus gallus]
gene11500	3006	2728	4508	3482	3475	4730	6080	6513	4670	3346	6.78396	5.27516	8.00858	7.69672	7.73644	11.1974	11.0058	14.971	10.7671	6.83203	0.000866396	1.08502	up	[RTKL]	General function prediction only;; Signal transduction mechanisms;; Transcription;; Replication, recombination and repair	Biological Process: neural crest cell migration (GO:0001755);; Molecular Function: transmembrane receptor protein tyrosine kinase activity (GO:0004714);; Molecular Function: signal transducer, downstream of receptor, with protein tyrosine kinase activity (GO:0004716);; Molecular Function: epidermal growth factor receptor binding (GO:0005154);; Molecular Function: ATP binding (GO:0005524);; Cellul…	K05085|0|apla:101801144|K05085 receptor tyrosine-protein kinase erbB-4 [EC:2.7.10.1] | (RefSeq) ERBB4; erb-b2 receptor tyrosine kinase 4	ErbB signaling pathway (ko04012);; Calcium signaling pathway (ko04020);; Endocytosis (ko04144)	[T]	Signal transduction mechanisms	Protein tyrosine kinase;; Receptor L domain;; Growth factor receptor domain IV;; Protein kinase domain;; Furin-like cysteine rich region	Melanoma receptor tyrosine-protein kinase (Precursor) GN=xmrk OS=Xiphophorus maculatus (Southern platyfish) PE=2 SV=2	T	Signal transduction mechanisms	ovarian receptor tyrosine kinase erbB4 precusor [Gallus gallus]
gene11523	1693	1807	1728	2054	1869	690	564	660	22	654	4.72787	4.60125	4.34539	4.53693	5.101	2.27068	1.36214	1.83421	0.069292	1.80987	2.71124e-05	-1.35051	down	--	--	Biological Process: intracellular protein transport (GO:0006886);; Biological Process: regulation of G-protein coupled receptor protein signaling pathway (GO:0008277);; Molecular Function: protein transporter activity (GO:0008565);; Cellular Component: integral component of membrane (GO:0016021);;	K08447|0|gga:424016|K08447 receptor activity modifying protein 1 | (RefSeq) RAMP1; receptor activity modifying protein 1	Vascular smooth muscle contraction (ko04270)	--	--	RNA recognition motif. (a.k.a. RRM, RBD, or RNP domain);; RNA recognition motif (a.k.a. RRM, RBD, or RNP domain)	RNA-binding protein 44 GN=rbm44 OS=Danio rerio (Zebrafish) PE=3 SV=1	R	General function prediction only	PREDICTED: RNA-binding protein 44 isoform X3 [Gallus gallus]
gene11538	621	82	546	469	1133	0	0	0	0	0	5.40873	0.637335	4.34168	2.99974	9.97008	0	0	0	0	0	5.62259e-10	#NAME?	down	[R]	General function prediction only	Biological Process: protein ubiquitination (GO:0016567);; Biological Process: intracellular signal transduction (GO:0035556);;	K10340|0|mgp:100548492|K10340 ankyrin repeat and SOCS box protein 18 | (RefSeq) ASB18; ankyrin repeat and SOCS box containing 18	--	[R]	General function prediction only	Ankyrin repeats (3 copies);; Ankyrin repeat;; Ankyrin repeats (many copies);; Ankyrin repeats (many copies);; Ankyrin repeat;; SOCS box	Serine/threonine-protein phosphatase 6 regulatory ankyrin repeat subunit B GN=ANKRD44 OS=Gallus gallus (Chicken) PE=2 SV=1	R	General function prediction only	PREDICTED: ankyrin repeat and SOCS box protein 18 isoform X1 [Meleagris gallopavo]
gene11571	61420	61550	59824	84223	40168	16248	16247	20921	14171	37226	297.777	272.224	261.171	323.091	190.393	92.8602	68.2296	101.297	80.9121	179.085	0.0061526	-1.06446	down	--	--	Cellular Component: collagen trimer (GO:0005581);; Cellular Component: extracellular space (GO:0005615);; Biological Process: cell adhesion (GO:0007155);; Cellular Component: sarcolemma (GO:0042383);; Cellular Component: protein complex (GO:0043234);; Biological Process: protein heterotrimerization (GO:0070208);;	K06238|0|gga:396292|K06238 collagen, type VI, alpha | (RefSeq) COL6A2, colVIA2; collagen type VI alpha 2 chain	Focal adhesion (ko04510);; ECM-receptor interaction (ko04512)	[W]	Extracellular structures	von Willebrand factor type A domain;; Collagen triple helix repeat (20 copies);; von Willebrand factor type A domain	Collagen alpha-2(VI) chain (Precursor) GN=COL6A2 OS=Gallus gallus (Chicken) PE=2 SV=1	W	Extracellular structures	collagen alpha-2(VI) chain precursor [Gallus gallus]
gene11607	4342	3420	4656	2753	3574	15547	18669	10933	9931	6727	10.5251	8.54038	8.4932	5.5255	7.55908	44.2766	41.8115	27.8318	30.3173	18.2569	2.44466e-05	2.23255	up	[E]	Amino acid transport and metabolism	--	K01425|0|apla:101803541|K01425 glutaminase [EC:3.5.1.2] | (RefSeq) GLS; glutaminase	Arginine biosynthesis (ko00220);; Alanine, aspartate and glutamate metabolism (ko00250);; D-Glutamine and D-glutamate metabolism (ko00471)	[E]	Amino acid transport and metabolism	Glutaminase;; Ankyrin repeats (many copies);; Ankyrin repeats (3 copies);; Ankyrin repeat;; Ankyrin repeat	Ankyrin repeat domain-containing protein 46 GN=ankrd46 OS=Danio rerio (Zebrafish) PE=2 SV=1	E	Amino acid transport and metabolism	PREDICTED: glutaminase kidney isoform, mitochondrial [Cuculus canorus]
gene11628	4331	1886	3166	5339	3055	7313	7984	7061	6277	5854	37.0713	16.1121	19.3632	37.1698	26.665	72.6567	60.1967	61.6958	64.6251	48.6842	1.25895e-06	1.48633	up	[I]	Lipid transport and metabolism	Cellular Component: mitochondrion (GO:0005739);;	K18588|9.43368e-150|gga:424057|K18588 coenzyme Q-binding protein COQ10 | (RefSeq) COQ10B; coenzyme Q10B	--	[I]	Lipid transport and metabolism	Polyketide cyclase / dehydrase and lipid transport	Coenzyme Q-binding protein COQ10 homolog A, mitochondrial (Precursor) GN=coq10b-a OS=Xenopus laevis (African clawed frog) PE=2 SV=1	I	Lipid transport and metabolism	PREDICTED: coenzyme Q-binding protein COQ10 homolog B, mitochondrial [Gallus gallus]
gene11645	2840	2549	5845	1755	4598	3814	7359	7713	2726	5309	6.4568	6.93128	12.0708	3.69319	14.0608	9.89842	14.7291	24.0624	7.2856	15.1066	0.0327648	1.07137	up	[F]	Nucleotide transport and metabolism	Molecular Function: iron ion binding (GO:0005506);; Molecular Function: UDP-N-acetylmuramate dehydrogenase activity (GO:0008762);; Molecular Function: electron carrier activity (GO:0009055);; Molecular Function: flavin adenine dinucleotide binding (GO:0050660);; Molecular Function: NAD binding (GO:0051287);; Molecular Function: 2 iron, 2 sulfur cluster binding (GO:0051537);;	K00157|0|gga:424071|K00157 aldehyde oxidase [EC:1.2.3.1] | (RefSeq) AOX1; aldehyde oxidase 1	Valine, leucine and isoleucine degradation (ko00280);; Tyrosine metabolism (ko00350);; Tryptophan metabolism (ko00380);; Vitamin B6 metabolism (ko00750);; Nicotinate and nicotinamide metabolism (ko00760);; Retinol metabolism (ko00830);; Drug metabolism - cytochrome P450 (ko00982)	[F]	Nucleotide transport and metabolism	Molybdopterin-binding domain of aldehyde dehydrogenase;; FAD binding domain in molybdopterin dehydrogenase;; Aldehyde oxidase and xanthine dehydrogenase, a/b hammerhead domain;; [2Fe-2S] binding domain;; CO dehydrogenase flavoprotein C-terminal domain;; 2Fe-2S iron-sulfur cluster binding domain	Xanthine oxidase GN=XDH OS=Gallus gallus (Chicken) PE=1 SV=1	F	Nucleotide transport and metabolism	TPA: TPA_inf: aldehyde oxidase 1 [Gallus gallus]
gene11724	596	709	622	806	829	196	251	203	171	323	4.98784	5.69124	4.83212	5.34487	6.78038	1.90794	1.80814	1.66532	1.63054	2.60432	0.0144823	-1.15811	down	--	--	Molecular Function: p53 binding (GO:0002039);; Molecular Function: nucleic acid binding (GO:0003676);; Cellular Component: nucleus (GO:0005634);; Molecular Function: zinc ion binding (GO:0008270);; Biological Process: intrinsic apoptotic signaling pathway by p53 class mediator (GO:0072332);;	--	--	--	--	Zinc-finger of C2H2 type;; Zinc-finger double-stranded RNA-binding;; C2H2 type zinc-finger (2 copies);; U1 zinc finger;; A-kinase anchoring protein 95 (AKAP95)	Zinc finger protein 385B GN=znf385b OS=Danio rerio (Zebrafish) PE=2 SV=1	R	General function prediction only	PREDICTED: zinc finger protein 385B isoform X5 [Gallus gallus]
gene11768	1967	1265	2130	2082	1603	2597	3775	3217	2498	1937	9.58154	5.30953	9.38136	8.38838	8.10844	15.0071	17.1623	15.3494	15.6801	9.45272	0.000104591	1.15116	up	--	--	Cellular Component: integral component of membrane (GO:0016021);; Biological Process: intracellular signal transduction (GO:0035556);; Biological Process: transmembrane transport (GO:0055085);;	--	--	--	--	Membrane transport protein;; Domain found in Dishevelled, Egl-10, and Pleckstrin (DEP)	--	T	Signal transduction mechanisms	PREDICTED: integral membrane protein GPR155 isoform X7 [Gallus gallus]
gene11781	110	156	53	87	73	397	676	405	115	162	0.552181	0.713147	0.237269	0.34397	0.913263	2.37585	3.21965	2.35271	1.2169	0.805741	0.011021	2.34528	up	--	--	--	K04351|0|fpg:101910581|K04351 Rap guanine nucleotide exchange factor 4 | (RefSeq) RAPGEF4; Rap guanine nucleotide exchange factor 4	Adrenergic signaling in cardiomyocytes (ko04261)	[T]	Signal transduction mechanisms	RasGEF domain;; Domain found in Dishevelled, Egl-10, and Pleckstrin (DEP);; Cyclic nucleotide-binding domain;; RasGEF N-terminal motif;; Ras association (RalGDS/AF-6) domain	Ras-specific guanine nucleotide-releasing factor RalGPS1 GN=RALGPS1 OS=Gallus gallus (Chicken) PE=2 SV=1	T	Signal transduction mechanisms	PREDICTED: rap guanine nucleotide exchange factor 4 isoform X1 [Haliaeetus leucocephalus]
gene11805	7592	6010	8189	6565	7909	11820	17266	10799	9996	7678	19.3462	14.1102	18.857	13.6059	19.8085	37.015	48.7625	28.7319	38.7405	19.9744	0.000681248	1.17086	up	--	--	Biological Process: in utero embryonic development (GO:0001701);; Biological Process: suckling behavior (GO:0001967);; Molecular Function: ubiquitin-protein transferase activity (GO:0004842);; Biological Process: ubiquitin-dependent protein catabolic process (GO:0006511);; Biological Process: sensory perception of smell (GO:0007608);; Molecular Function: zinc ion binding (GO:0008270);; Biological…	K11978|0|fpg:101922658|K11978 E3 ubiquitin-protein ligase UBR3 [EC:2.3.2.27] | (RefSeq) UBR3; ubiquitin protein ligase E3 component n-recognin 3 (putative)	--	[O]	Posttranslational modification, protein turnover, chaperones	Putative zinc finger in N-recognin (UBR box)	--	O	Posttranslational modification, protein turnover, chaperones	PREDICTED: E3 ubiquitin-protein ligase UBR3 [Falco peregrinus]
gene11853	851	517	762	1038	1275	218	230	180	306	365	4.17557	1.79629	2.78717	3.77068	6.01359	0.946443	0.713073	0.775472	1.52982	1.38641	0.00784518	-1.2727	down	[T]	Signal transduction mechanisms	Molecular Function: signal transducer activity (GO:0004871);; Molecular Function: voltage-gated potassium channel activity (GO:0005249);; Cellular Component: integral component of membrane (GO:0016021);;	K04910|0|gga:424184|K04910 potassium voltage-gated channel Eag-related subfamily H member 7 | (RefSeq) KCNH7; potassium voltage-gated channel subfamily H member 7	--	[PT]	Inorganic ion transport and metabolism;; Signal transduction mechanisms	Ion transport protein;; PAS domain;; Cyclic nucleotide-binding domain;; Ion channel;; PAS fold	Potassium voltage-gated channel subfamily H member 2 (Fragment) GN=KCNH2 OS=Gallus gallus (Chicken) PE=2 SV=1	P	Inorganic ion transport and metabolism	PREDICTED: potassium voltage-gated channel subfamily H member 7 isoform X1 [Gallus gallus]
gene11856	2026	2648	2060	2379	961	563	431	920	411	1004	11.3389	13.1088	8.09488	10.3111	5.41367	3.73496	2.33558	4.74504	1.70083	6.04631	0.00792612	-1.09695	down	[E]	Amino acid transport and metabolism	Molecular Function: serine-type endopeptidase activity (GO:0004252);; Biological Process: proteolysis (GO:0006508);; Cellular Component: membrane (GO:0016020);;	K08674|0|gga:424186|K08674 fibroblast activation protein, alpha [EC:3.4.21.-] | (RefSeq) FAP; fibroblast activation protein alpha	--	[O]	Posttranslational modification, protein turnover, chaperones	Dipeptidyl peptidase IV (DPP IV) N-terminal region;; Prolyl oligopeptidase family;; Alpha/beta hydrolase family;; Alpha/beta hydrolase family	--	O	Posttranslational modification, protein turnover, chaperones	seprase [Gallus gallus]
gene11895	3885	3980	4566	5514	4165	7203	11525	7383	5698	7076	17.46	16.3005	18.4678	19.5913	18.2873	38.1644	44.8445	33.6442	30.1899	31.525	2.24362e-05	1.31632	up	--	--	--	K17907|0|gga:425722|K17907 autophagy-related protein 9 | (RefSeq) ATG9A, ATG9; autophagy related 9A	--	[R]	General function prediction only	Autophagy protein Apg9	--	R	General function prediction only	PREDICTED: autophagy-related protein 9A [Haliaeetus leucocephalus]
gene11915	3844	2787	4370	3534	5235	4789	6458	6438	5453	7932	37.5905	24.7274	38.3263	28.0884	48.997	57.3892	57.1658	63.6201	63.8148	78.2193	0.000233215	1.13169	up	[R]	General function prediction only	Biological Process: glycogen biosynthetic process (GO:0005978);; Biological Process: glucose transport (GO:0015758);; Molecular Function: protein kinase binding (GO:0019901);; Molecular Function: adenyl nucleotide binding (GO:0030554);;	K07200|0|gga:424208|K07200 5'-AMP-activated protein kinase, regulatory gamma subunit | (RefSeq) PRKAG3; protein kinase AMP-activated non-catalytic subunit gamma 3	FoxO signaling pathway (ko04068);; Insulin signaling pathway (ko04910);; Adipocytokine signaling pathway (ko04920)	[C]	Energy production and conversion	CBS domain	--	C	Energy production and conversion	5&apos;-AMP-activated protein kinase gamma-3 non-catalytic subunit long form [Gallus gallus]
gene1197	184	394	241	196	231	54	68	56	41	124	3.49354	6.67185	3.6487	2.96631	4.24884	0.830875	0.768097	1.09107	1.1883	2.02789	0.0426477	-1.40734	down	--	--	Biological Process: endochondral ossification (GO:0001958);; Biological Process: osteoblast development (GO:0002076);; Molecular Function: hormone activity (GO:0005179);; Cellular Component: extracellular region (GO:0005576);; Cellular Component: nucleus (GO:0005634);; Cellular Component: Golgi apparatus (GO:0005794);; Biological Process: adenylate cyclase-activating G-protein coupled receptor si…	--	--	--	--	Parathyroid hormone family	Osteostatin (Precursor) GN=PTHLH OS=Gallus gallus (Chicken) PE=1 SV=1	T	Signal transduction mechanisms	RecName: Full=Parathyroid hormone-related protein; Short=PTH-rP; Short=PTHrP; Contains: RecName: Full=Osteostatin; AltName: Full=PTHrP[107-139]; Flags: Precursor [Gallus gallus]
gene11985	264	294	184	217	101	1277	995	682	557	896	2.8861	2.88838	1.60284	1.89747	0.97507	12.9179	9.33947	7.47098	7.11649	10.2982	9.89768e-07	2.57259	up	--	--	Biological Process: negative regulation of cell growth (GO:0030308);; Cellular Component: ELL-EAF complex (GO:0032783);; Biological Process: positive regulation of transcription, DNA-templated (GO:0045893);; Biological Process: negative regulation of epithelial cell proliferation involved in prostate gland development (GO:0060770);;	K15186|6.27455e-151|gga:424243|K15186 ELL-associated factor | (RefSeq) EAF2; ELL associated factor 2	--	[K]	Transcription	RNA polymerase II transcription elongation factor	ELL-associated factor 2 GN=EAF2 OS=Gallus gallus (Chicken) PE=2 SV=1	K	Transcription	ELL-associated factor 2 [Gallus gallus]
gene12027	131	181	364	210	323	210	752	528	397	280	0.775153	0.946466	1.85941	1.01527	1.29517	1.19673	3.81864	2.96986	2.66921	1.50534	0.0335691	1.3306	up	[R]	General function prediction only	Molecular Function: ferric-chelate reductase activity (GO:0000293);; Cellular Component: multivesicular body (GO:0005771);; Cellular Component: plasma membrane (GO:0005886);; Biological Process: iron ion transport (GO:0006826);; Biological Process: protein secretion (GO:0009306);;	K10142|0|gga:424275|K10142 metalloreductase STEAP3 [EC:1.16.1.-] | (RefSeq) STEAP3; STEAP3 metalloreductase	p53 signaling pathway (ko04115)	--	--	Ferric reductase like transmembrane component;; NADP oxidoreductase coenzyme F420-dependent	--	R	General function prediction only	PREDICTED: metalloreductase STEAP3 isoform X6 [Gallus gallus]
gene1206	1509	2042	1311	2623	2139	3076	4280	3139	4014	4125	13.0241	16.2369	10.4569	18.1975	18.695	32.9599	33.5814	28.3177	40.8129	36.0159	2.15834e-07	1.46911	up	[G]	Carbohydrate transport and metabolism	Molecular Function: catalytic activity (GO:0003824);; Cellular Component: intracellular (GO:0005622);; Biological Process: positive regulation of cardiac muscle cell apoptotic process (GO:0010666);; Biological Process: negative regulation of mitophagy (GO:1901525);; Biological Process: negative regulation of reactive oxygen species metabolic process (GO:2000378);;	K14634|0|mgp:100550068|K14634 fructose-2,6-bisphosphatase [EC:3.1.3.46] | (RefSeq) TIGAR; TP53 induced glycolysis regulatory phosphatase	Fructose and mannose metabolism (ko00051)	[G]	Carbohydrate transport and metabolism	Histidine phosphatase superfamily (branch 1)	Fructose-2,6-bisphosphatase TIGAR GN=tigar OS=Xenopus tropicalis (Western clawed frog) PE=2 SV=1	G	Carbohydrate transport and metabolism	PREDICTED: fructose-2,6-bisphosphatase TIGAR isoform X3 [Gallus gallus]
gene12065	725	1442	1531	2134	1521	5807	10373	4207	5551	1494	0.686023	1.09047	3.03593	3.75055	2.51738	9.59825	12.4375	8.82125	9.02607	2.65727	0.00371198	2.44923	up	--	--	--	--	--	[O]	Posttranslational modification, protein turnover, chaperones	Thrombospondin type 1 domain	Spondin-1 (Precursor) GN=SPON1 OS=Gallus gallus (Chicken) PE=2 SV=1	O	Posttranslational modification, protein turnover, chaperones	PREDICTED: thrombospondin type-1 domain-containing protein 7B [Gallus gallus]
gene12066	1851	717	951	1908	1649	6000	6883	8581	11405	10255	6.83469	2.74093	3.58206	5.97703	5.98861	17.2314	13.3352	26.8887	38.396	23.8931	6.33738e-11	3.12418	up	--	--	--	--	--	--	--	Methyltransferase domain	Histamine N-methyltransferase GN=hnmt OS=Xenopus tropicalis (Western clawed frog) PE=2 SV=1	R	General function prediction only	PREDICTED: histamine N-methyltransferase-like isoform X1 [Gallus gallus]
gene12129	11601	19033	12771	14635	10349	18850	30159	21467	20776	17881	48.3456	70.6204	47.8721	46.2335	42.0743	91.9926	107.713	88.7408	101.036	71.5187	0.000842255	1.19006	up	[C]	Energy production and conversion	--	K00111|0|gga:424321|K00111 glycerol-3-phosphate dehydrogenase [EC:1.1.5.3] | (RefSeq) GPD2; glycerol-3-phosphate dehydrogenase 2	Glycerophospholipid metabolism (ko00564)	[C]	Energy production and conversion	FAD dependent oxidoreductase;; EF-hand domain pair;; FAD binding domain;; EF hand;; EF-hand domain;; FAD dependent oxidoreductase;; Glucose inhibited division protein A;; Pyridine nucleotide-disulphide oxidoreductase	Calmodulin GN=calm OS=Electrophorus electricus (Electric eel) PE=2 SV=2	C	Energy production and conversion	PREDICTED: glycerol-3-phosphate dehydrogenase, mitochondrial [Gallus gallus]
gene12279	4575	2947	3482	6901	3628	997	934	1144	953	1872	64.1257	37.6472	43.9232	76.4785	49.6782	16.4672	11.3311	15.9531	15.7441	26.0041	0.000300555	-1.36396	down	--	--	Molecular Function: GTPase activator activity (GO:0005096);; Cellular Component: cytosol (GO:0005829);; Biological Process: spermatogenesis (GO:0007283);; Cellular Component: cytoplasmic side of plasma membrane (GO:0009898);; Biological Process: negative regulation of phospholipase activity (GO:0010519);; Biological Process: negative regulation of cardiac muscle hypertrophy (GO:0010614);; Biologi…	K18154|8.44665e-156|gga:378912|K18154 regulator of G-protein signaling 2 | (RefSeq) RGS2; regulator of G-protein signaling 2	--	[T]	Signal transduction mechanisms	Regulator of G protein signaling domain	Regulator of G-protein signaling 8 GN=rgs8 OS=Danio rerio (Zebrafish) PE=2 SV=1	T	Signal transduction mechanisms	regulator of G-protein signaling 2 [Gallus gallus]
gene12287	193	202	178	294	176	277	256	278	445	404	4.21145	3.86572	3.49606	5.22009	3.65661	6.76757	4.74565	5.73462	10.9649	8.41055	0.0345572	1.21539	up	[MG]	Cell wall/membrane/envelope biogenesis;; Carbohydrate transport and metabolism	Cellular Component: nuclear envelope (GO:0005635);; Cellular Component: cytoplasm (GO:0005737);; Biological Process: regulation of apoptotic process (GO:0042981);; Biological Process: regulation of angiogenesis (GO:0045765);; Biological Process: nuclear import (GO:0051170);;	K17290|5.89967e-111|gga:424363|K17290 oxidoreductase [EC:1.1.1.-] | (RefSeq) HTATIP2; HIV-1 Tat interactive protein 2	--	[T]	Signal transduction mechanisms	NADH(P)-binding;; Semialdehyde dehydrogenase, NAD binding domain	--	T	Signal transduction mechanisms	PREDICTED: oxidoreductase HTATIP2 isoform X2 [Gallus gallus]
gene12289	197	317	390	473	308	1871	2725	2551	2936	1819	1.0834	1.52507	2.18289	2.41779	1.90603	14.7111	16.6401	15.5455	22.4432	12.3786	8.61806e-16	3.37542	up	--	--	Biological Process: cell adhesion (GO:0007155);; Cellular Component: membrane (GO:0016020);; Molecular Function: carbohydrate binding (GO:0030246);;	K06496|0|gga:424364|K06496 selectin, platele | (RefSeq) SELP; selectin P	Cell adhesion molecules (CAMs) (ko04514)	[TV]	Signal transduction mechanisms;; Defense mechanisms	Sushi domain (SCR repeat);; Lectin C-type domain;; Complement Clr-like EGF-like;; EGF-like domain;; EGF-like domain	Sushi repeat-containing protein SRPX2 (Precursor) GN=srpx2 OS=Xenopus laevis (African clawed frog) PE=2 SV=1	T	Signal transduction mechanisms	PREDICTED: P-selectin isoform X6 [Gallus gallus]
gene12303	5717	12754	5358	9178	5898	1130	2120	1678	1397	4666	134.732	273.954	113.638	171.005	135.794	31.3828	43.2391	39.3367	38.8045	109.012	0.0272297	-1.37819	down	--	--	Molecular Function: AT DNA binding (GO:0003680);; Cellular Component: cytoplasm (GO:0005737);; Molecular Function: zinc ion binding (GO:0008270);; Molecular Function: DNA binding, bending (GO:0008301);; Biological Process: intrinsic apoptotic signaling pathway in response to DNA damage (GO:0008630);; Biological Process: response to zinc ion (GO:0010043);; Molecular Function: peptide binding (GO:0…	--	--	[TZ]	Signal transduction mechanisms;; Cytoskeleton	LIM domain	Cysteine and glycine-rich protein 2 GN=CSRP2 OS=Gallus gallus (Chicken) PE=2 SV=3	T	Signal transduction mechanisms	cysteine-rich protein 1 (intestinal) [Gallus gallus]
gene12312	350	79	318	577	505	42	12	54	98	33	4.11387	0.823667	3.38162	5.32272	5.83556	0.74765	0.108946	0.614942	1.36001	0.390955	0.00276394	-2.32392	down	[HE]	Coenzyme transport and metabolism;; Amino acid transport and metabolism	--	K00058|0|gga:424381|K00058 D-3-phosphoglycerate dehydrogenase [EC:1.1.1.95] | (RefSeq) PHGDH; phosphoglycerate dehydrogenase	Glycine, serine and threonine metabolism (ko00260);; Carbon metabolism (ko01200);; Biosynthesis of amino acids (ko01230)	[E]	Amino acid transport and metabolism	D-isomer specific 2-hydroxyacid dehydrogenase, NAD binding domain;; D-isomer specific 2-hydroxyacid dehydrogenase, catalytic domain	C-terminal-binding protein 2 GN=ctbp2 OS=Xenopus laevis (African clawed frog) PE=1 SV=1	E	Amino acid transport and metabolism	PREDICTED: d-3-phosphoglycerate dehydrogenase [Gallus gallus]
gene12338	607	1036	494	705	318	94	126	95	144	197	10.7328	15.4674	7.42504	6.85747	5.27438	1.21122	1.35973	1.02292	2.75189	3.09973	0.00222497	-1.76245	down	[K]	Transcription	Biological Process: positive regulation of mesenchymal cell proliferation (GO:0002053);; Molecular Function: transcription factor activity, sequence-specific DNA binding (GO:0003700);; Cellular Component: nucleolus (GO:0005730);; Biological Process: regulation of transcription, DNA-templated (GO:0006355);; Biological Process: embryonic limb morphogenesis (GO:0030326);; Biological Process: inner e…	K09329|1.88247e-152|gga:373941|K09329 paired mesoderm homeobox protein | (RefSeq) PRRX1, PMX1, Prx-1, Prx1, gMHox, homeobox; paired related homeobox 1	--	[R]	General function prediction only	Homeobox domain	Paired mesoderm homeobox protein 1 GN=PRRX1 OS=Gallus gallus (Chicken) PE=1 SV=2	K	Transcription	paired mesoderm homeobox protein 1 [Gallus gallus]
gene12343	1215	444	992	1523	880	7582	6687	5993	5898	7001	4.48183	1.78222	3.87949	4.73574	3.04015	32.0112	22.546	23.6613	26.0528	25.5843	1.39424e-30	3.24427	up	--	--	Molecular Function: methyltransferase activity (GO:0008168);;	K19579|0|gga:429066|K19579 protein N-terminal monomethyltransferase [EC:2.1.1.299] | (RefSeq) METTL11B, C1orf184; methyltransferase like 11B	--	[R]	General function prediction only	AdoMet dependent proline di-methyltransferase;; Methyltransferase domain	Alpha N-terminal protein methyltransferase 1B GN=mettl11b OS=Danio rerio (Zebrafish) PE=3 SV=2	R	General function prediction only	PREDICTED: alpha N-terminal protein methyltransferase 1B isoform X4 [Gallus gallus]
gene12351	373	358	438	474	352	570	678	591	556	531	4.56194	4.44394	4.88204	4.74926	4.45296	9.36127	7.49538	7.60595	8.2682	6.52825	0.01717	1.07746	up	--	--	--	--	--	[R]	General function prediction only	Putative methyltransferase;; Methyltransferase domain;; Methyltransferase domain;; Methyltransferase domain;; Methyltransferase small domain;; Ribosomal protein L11 methyltransferase (PrmA)	--	R	General function prediction only	PREDICTED: histidine protein methyltransferase 1 homolog [Gallus gallus]
gene12356	6452	4761	5442	4986	5068	7422	9510	6863	6839	7286	27.4927	17.2651	19.8636	15.9978	20.2255	37.1442	35.0531	26.2956	34.5005	29.1588	0.00288163	1.00455	up	--	--	Biological Process: vasculature development (GO:0001944);; Molecular Function: transcription factor activity, sequence-specific DNA binding (GO:0003700);; Molecular Function: protein binding (GO:0005515);; Cellular Component: nucleus (GO:0005634);; Cellular Component: transcription factor complex (GO:0005667);; Biological Process: nervous system development (GO:0007399);; Biological Process: neur…	K09355|0|ssc:100154639|K09355 pre-B-cell leukemia transcription factor 1 | (RefSeq) PBX1; PBX homeobox 1	Transcriptional misregulation in cancer (ko05202)	[K]	Transcription	PBC domain;; Homeobox domain;; Homeobox KN domain	Pre-B-cell leukemia transcription factor 1 {ECO:0000250|UniProtKB:P40424} OS=Xenopus tropicalis (Western clawed frog) PE=2 SV=1	K	Transcription	PREDICTED: pre-B-cell leukemia transcription factor 1 isoform X2 [Cuculus canorus]
gene12405	1327	998	852	1231	731	403	332	281	299	451	7.23717	4.9236	4.72745	5.77012	3.9816	3.19264	1.78406	2.03104	2.67022	3.18421	0.00997712	-1.03126	down	--	--	Molecular Function: receptor binding (GO:0005102);; Cellular Component: extracellular space (GO:0005615);; Biological Process: transmembrane receptor protein tyrosine kinase signaling pathway (GO:0007169);;	--	--	[R]	General function prediction only	Fibrinogen beta and gamma chains, C-terminal globular domain	Fibrinogen C domain-containing protein 1 GN=fibcd1 OS=Xenopus tropicalis (Western clawed frog) PE=2 SV=1	R	General function prediction only	angiopoietin-related protein 1 precursor [Gallus gallus]
gene12425	12160	8442	15004	8874	12575	17910	23889	19837	13038	12276	20.7398	13.1234	23.0329	11.9669	20.9543	36.0138	35.2759	33.6603	26.2156	20.7587	0.00173327	1.10607	up	[R]	General function prediction only	Molecular Function: nucleic acid binding (GO:0003676);; Cellular Component: nucleus (GO:0005634);; Molecular Function: metal ion binding (GO:0046872);;	K10509|0|gga:429073|K10509 zinc finger and BTB domain-containing protein 37 | (RefSeq) ZBTB37; zinc finger and BTB domain containing 37	--	[R]	General function prediction only	BTB/POZ domain;; Zinc-finger double domain;; Zinc finger, C2H2 type;; C2H2-type zinc finger	Hypermethylated in cancer 1 protein (Fragment) GN=HIC1 OS=Gallus gallus (Chicken) PE=2 SV=2	R	General function prediction only	PREDICTED: zinc finger and BTB domain-containing protein 37 isoform X3 [Gallus gallus]
gene12474	3837	2231	4673	1012	1097	2766	5457	4956	2716	3658	15.2245	8.64027	15.8525	4.01279	4.69358	12.2172	18.8102	18.7098	12.0762	13.9681	0.0238426	1.07746	up	--	--	Molecular Function: nucleotide binding (GO:0000166);; Molecular Function: nucleic acid binding (GO:0003676);; Cellular Component: U12-type spliceosomal complex (GO:0005689);;	K13157|0|gga:424458|K13157 U11/U12 small nuclear ribonucleoprotein 65 kDa protein | (RefSeq) RNPC3; RNA binding region (RNP1, RRM) containing 3	--	[A]	RNA processing and modification	RNA recognition motif. (a.k.a. RRM, RBD, or RNP domain);; RNA recognition motif (a.k.a. RRM, RBD, or RNP domain);; RNA recognition motif. (a.k.a. RRM, RBD, or RNP domain)	--	A	RNA processing and modification	PREDICTED: RNA-binding protein 40 isoform X10 [Gallus gallus]
gene12498	1053	768	934	1357	744	1549	1843	1555	1661	1338	5.72159	4.17457	5.2585	5.75597	4.56114	8.70799	8.17108	8.19171	8.72043	7.34191	6.20452e-05	1.2476	up	--	--	Cellular Component: cytoplasm (GO:0005737);; Cellular Component: microtubule organizing center (GO:0005815);; Biological Process: cell cycle (GO:0007049);;	K16487|0|gga:424471|K16487 spindle assembly abnormal protein 6 | (RefSeq) SASS6; SAS-6 centriolar assembly protein	--	--	--	--	Spindle assembly abnormal protein 6 homolog GN=SASS6 OS=Gallus gallus (Chicken) PE=2 SV=1	S	Function unknown	spindle assembly abnormal protein 6 homolog [Gallus gallus]
gene12501	2192	1739	2241	2461	2300	4738	5709	6346	4278	3992	3.27029	2.06725	2.6052	2.60769	2.84167	8.79287	7.01334	8.73428	7.79805	5.53133	1.70534e-09	1.71172	up	--	--	--	--	--	--	--	Reeler domain	Putative ferric-chelate reductase 1 GN=frrs1 OS=Danio rerio (Zebrafish) PE=2 SV=1	T	Signal transduction mechanisms	PREDICTED: hornerin-like isoform X2 [Gallus gallus]
gene12502	85280	64612	90226	65517	70435	151941	197748	181657	133590	91434	273.974	188.263	262.064	167.061	215.201	581.345	556.129	586.618	511.116	289.593	1.40758e-05	1.52267	up	[G]	Carbohydrate transport and metabolism	--	K01196|0|mgp:100551267|K01196 glycogen debranching enzyme [EC:2.4.1.25 3.2.1.33] | (RefSeq) AGL; amylo-alpha-1, 6-glucosidase, 4-alpha-glucanotransferase	Starch and sucrose metabolism (ko00500)	[G]	Carbohydrate transport and metabolism	glucanotransferase domain of human glycogen debranching enzyme;; Amylo-alpha-1,6-glucosidase;; central domain of human glycogen debranching enzyme;; N-terminal domain from the human glycogen debranching enzyme;; Alpha amylase, catalytic domain	--	G	Carbohydrate transport and metabolism	PREDICTED: glycogen debranching enzyme [Pygoscelis adeliae]
gene12508	33	65	50	20	49	42	137	116	88	49	0.098768	0.182273	0.137231	0.048481	0.146646	0.149365	0.364205	0.351666	0.318003	0.149545	0.0445509	1.4765	up	--	--	Molecular Function: catalytic activity (GO:0003824);; Cellular Component: membrane (GO:0016020);;	K19582|0|gga:424476|K19582 lipid phosphate phosphatase-related protein type 3/4 | (RefSeq) PLPPR4, D3BWG0562E, LPPR4; phospholipid phosphatase related 4	--	[I]	Lipid transport and metabolism	PAP2 superfamily	Lipid phosphate phosphatase-related protein type 5 GN=lppr5 OS=Xenopus laevis (African clawed frog) PE=2 SV=2	I	Lipid transport and metabolism	PREDICTED: lipid phosphate phosphatase-related protein type 4 isoform X3 [Gallus gallus]
gene12519	642	544	670	404	486	1062	960	798	730	849	2.64111	1.91685	2.7959	1.07092	1.87927	4.94415	3.95776	3.40253	4.16596	3.15168	0.00116395	1.18776	up	--	--	Cellular Component: integral component of membrane (GO:0016021);;	--	--	[TR]	Signal transduction mechanisms;; General function prediction only	TLC domain	Transmembrane protein 56-B GN=tmem56-b OS=Xenopus laevis (African clawed frog) PE=2 SV=1	T	Signal transduction mechanisms	transmembrane protein 56 [Gallus gallus]
gene12522	258	257	288	257	317	554	515	475	415	693	1.98439	1.61939	1.89897	1.39168	2.07065	3.94322	3.00118	3.57572	2.68412	4.0656	0.000866396	1.43761	up	--	--	Cellular Component: integral component of membrane (GO:0016021);;	K15282|0|gga:424486|K15282 solute carrier family 44 (choline transporter-like protein), member 3 | (RefSeq) SLC44A3; solute carrier family 44 member 3	--	[I]	Lipid transport and metabolism	Plasma-membrane choline transporter	Choline transporter-like protein 1 GN=slc44a1 OS=Xenopus laevis (African clawed frog) PE=2 SV=2	P	Inorganic ion transport and metabolism	PREDICTED: solute carrier family 44, member 3 isoform X8 [Gallus gallus]
gene12565	280	294	256	243	212	452	527	539	310	262	1.04057	0.996023	0.855582	0.714353	0.77055	1.98245	1.69514	1.99594	1.35808	0.966116	0.0155524	1.21602	up	--	--	--	--	--	[R]	General function prediction only	Leucine-rich repeat containing protein 8;; Leucine rich repeat;; Leucine Rich repeats (2 copies);; Leucine Rich Repeat;; Leucine rich repeats (6 copies)	Volume-regulated anion channel subunit LRRC8E GN=lrrc8e OS=Xenopus tropicalis (Western clawed frog) PE=2 SV=1	S	Function unknown	PREDICTED: leucine-rich repeat-containing protein 8B isoform X1 [Gallus gallus]
gene1260	18984	25881	13645	26922	9885	3825	3334	5027	2771	9338	119.25	156.759	74.5479	141.815	64.3368	30.1688	19.2412	33.2471	21.6723	61.2602	0.00325562	-1.49262	down	--	--	Cellular Component: microfibril (GO:0001527);;	--	--	--	--	Microfibril-associated glycoprotein (MAGP)	--	O	Posttranslational modification, protein turnover, chaperones	PREDICTED: microfibrillar-associated protein 5 isoform X3 [Gallus gallus]
gene12741	666	599	1047	705	536	89	138	100	201	112	7.94116	6.50674	11.2323	6.63997	6.24021	1.24937	1.41984	1.18236	2.82265	1.32348	5.00954e-06	-1.921	down	[K]	Transcription	Biological Process: neural crest cell migration (GO:0001755);; Molecular Function: double-stranded DNA binding (GO:0003690);; Molecular Function: transcription factor activity, RNA polymerase II distal enhancer sequence-specific binding (GO:0003705);; Cellular Component: nucleus (GO:0005634);; Cellular Component: transcription factor complex (GO:0005667);; Biological Process: pattern specificatio…	K09397|6.09386e-87|gga:395795|K09397 forkhead box protein D | (RefSeq) FOXD2; forkhead box D2	--	[K]	Transcription	Fork head domain	Forkhead box protein D2 OS=Xenopus laevis (African clawed frog) PE=2 SV=1	K	Transcription	forkhead box D2 [Gallus gallus]
gene12744	605	802	673	1154	340	114	188	182	171	280	1.70119	1.86502	1.64109	2.5166	0.886258	0.313539	0.380561	0.422465	0.471783	0.647821	0.00154917	-1.42088	down	--	--	--	--	--	--	--	TraB family	Metalloprotease TIKI2 (Precursor) GN=trabd2b OS=Xenopus tropicalis (Western clawed frog) PE=2 SV=1	T	Signal transduction mechanisms	PREDICTED: metalloprotease TIKI2 [Gallus gallus]
gene1281	3200	2544	3187	3009	2425	4409	5500	4056	3499	2927	14.4018	10.4362	12.916	10.707	10.6632	23.3998	21.4364	18.1679	18.5723	13.3271	0.00119638	1.02322	up	[U]	Intracellular trafficking, secretion, and vesicular transport	Cellular Component: nucleus (GO:0005634);; Cellular Component: cytoplasm (GO:0005737);; Molecular Function: protein transporter activity (GO:0008565);; Cellular Component: dendrite (GO:0030425);; Biological Process: positive regulation of protein import into nucleus (GO:0042307);;	K15042|0|mgp:100551399|K15042 importin subunit alpha-1 | (RefSeq) importin subunit alpha-5	Influenza A (ko05164)	[U]	Intracellular trafficking, secretion, and vesicular transport	Armadillo/beta-catenin-like repeat;; Importin beta binding domain;; HEAT repeats;; HEAT-like repeat;; HEAT repeat;; Armadillo-like	Importin subunit alpha-5 GN=KPNA1 OS=Gallus gallus (Chicken) PE=2 SV=1	U	Intracellular trafficking, secretion, and vesicular transport	importin subunit alpha-5 [Gallus gallus]
gene1282	4380	2750	4099	5988	5272	6500	9155	7445	7741	6283	22.1999	12.5534	19.1956	23.4224	26.525	39.1154	45.4455	37.9545	47.3395	32.5732	0.000116038	1.2433	up	--	--	Molecular Function: ubiquitin-protein transferase activity (GO:0004842);; Cellular Component: nucleus (GO:0005634);; Cellular Component: cytoplasm (GO:0005737);; Cellular Component: centrosome (GO:0005813);; Molecular Function: zinc ion binding (GO:0008270);; Biological Process: protein ubiquitination (GO:0016567);; Biological Process: muscle cell differentiation (GO:0042692);;	K10315|0|gga:426341|K10315 F-box protein 40 | (RefSeq) FBXO40; F-box protein 40	--	--	--	--	--	R	General function prediction only	PREDICTED: F-box only protein 40 [Gallus gallus]
gene12821	14067	8636	15266	13496	11895	20602	26217	23594	19981	12066	27.8299	15.571	27.192	21.1095	22.9937	48.0502	44.9082	46.4434	46.6053	23.7257	0.000681248	1.2217	up	[O]	Posttranslational modification, protein turnover, chaperones	--	K11840|0|phi:102110963|K11840 ubiquitin carboxyl-terminal hydrolase 9/24 [EC:3.4.19.12] | (RefSeq) USP24; ubiquitin specific peptidase 24	--	[O]	Posttranslational modification, protein turnover, chaperones	Ubiquitin carboxyl-terminal hydrolase;; Ubiquitin carboxyl-terminal hydrolase	Ubiquitin carboxyl-terminal hydrolase 47 GN=usp47 OS=Xenopus tropicalis (Western clawed frog) PE=2 SV=1	O	Posttranslational modification, protein turnover, chaperones	PREDICTED: LOW QUALITY PROTEIN: ubiquitin carboxyl-terminal hydrolase 24 [Pseudopodoces humilis]
gene1284	272	165	223	169	151	390	288	328	456	232	1.90187	0.834913	1.65643	1.07258	1.21774	2.30527	1.32061	2.28759	1.90133	1.86047	0.0195853	1.34179	up	--	--	Cellular Component: mitochondrion (GO:0005739);; Cellular Component: integral component of membrane (GO:0016021);; Biological Process: vesicle-mediated transport (GO:0016192);; Cellular Component: cell junction (GO:0030054);; Cellular Component: synaptic vesicle membrane (GO:0030672);; Cellular Component: neuron projection (GO:0043005);;	K08510|2.91122e-43|gga:418273|K08510 vesicle-associated membrane protein 1 | (RefSeq) VAMP1; vesicle-associated membrane protein 1 (synaptobrevin 1)	SNARE interactions in vesicular transport (ko04130)	[U]	Intracellular trafficking, secretion, and vesicular transport	Synaptobrevin	Synaptobrevin OS=Torpedo californica (Pacific electric ray) PE=2 SV=1	U	Intracellular trafficking, secretion, and vesicular transport	vesicle-associated membrane protein 1 (synaptobrevin 1) [Gallus gallus]
gene12868	346	273	395	331	278	439	753	541	357	493	2.69529	1.54639	2.63155	1.96896	2.06828	4.09289	5.59126	4.21759	3.19086	4.0287	0.0100016	1.15799	up	--	--	--	--	--	[T]	Signal transduction mechanisms	EF-hand domain pair;; EF hand;; EF-hand domain pair;; EF-hand domain	EF-hand calcium-binding domain-containing protein 7 GN=efcab7 OS=Xenopus laevis (African clawed frog) PE=2 SV=1	T	Signal transduction mechanisms	PREDICTED: EF-hand calcium-binding domain-containing protein 7 isoform X1 [Gallus gallus]
gene12869	140005	145926	147150	120987	100906	360117	409581	359995	301747	323844	1179.39	1120.13	1115.66	806.173	831.003	3571.93	2980.12	3013.15	2992.68	2700.52	6.22647e-09	1.93415	up	[G]	Carbohydrate transport and metabolism	--	K01835|0|apla:101790428|K01835 phosphoglucomutase [EC:5.4.2.2] | (RefSeq) PGM1; phosphoglucomutase 1	Glycolysis / Gluconeogenesis (ko00010);; Pentose phosphate pathway (ko00030);; Galactose metabolism (ko00052);; Purine metabolism (ko00230);; Starch and sucrose metabolism (ko00500);; Amino sugar and nucleotide sugar metabolism (ko00520)	[G]	Carbohydrate transport and metabolism	Phosphoglucomutase/phosphomannomutase, alpha/beta/alpha domain I;; Phosphoglucomutase/phosphomannomutase, alpha/beta/alpha domain III;; Phosphoglucomutase/phosphomannomutase, alpha/beta/alpha domain II;; Phosphoglucomutase/phosphomannomutase, C-terminal domain	--	G	Carbohydrate transport and metabolism	Phosphoglucomutase-1, partial [Haliaeetus albicilla]
gene1289	13	86	13	37	30	38	138	125	107	159	0.257386	1.54875	0.221421	0.57422	0.58025	0.8901	2.37727	2.46194	2.50539	3.13288	0.000987398	2.13857	up	--	--	Molecular Function: hormone activity (GO:0005179);; Cellular Component: extracellular region (GO:0005576);; Biological Process: regulation of blood vessel size (GO:0050880);;	--	--	--	--	Atrial natriuretic peptide	--	--	--	C-type natriuretic peptide 1 precursor [Gallus gallus]
gene13025	427	773	536	457	449	947	1170	1029	703	983	3.6784	6.12155	4.09486	3.24818	3.31226	9.87499	8.941	8.27413	7.2842	8.80825	5.9995e-05	1.36957	up	--	--	Cellular Component: Golgi apparatus (GO:0005794);; Cellular Component: integral component of membrane (GO:0016021);;	--	--	--	--	EamA-like transporter family	Solute carrier family 35 member G2 GN=SLC35G2 OS=Gallus gallus (Chicken) PE=2 SV=1	S	Function unknown	solute carrier family 35 member G2 [Gallus gallus]
gene13027	7738	8773	7654	10099	7314	12418	14489	11602	10123	10109	40.887	42.2933	36.4196	42.2139	37.7905	77.3553	66.1859	60.9404	63.084	53.0675	0.00479924	1.02019	up	--	--	--	--	--	--	--	--	--	S	Function unknown	uncharacterized protein LOC424740 [Gallus gallus]
gene13065	738	631	1157	587	788	825	1482	1915	968	765	1.36555	0.870957	1.66836	1.0243	1.57048	2.21935	2.9408	3.2229	2.62514	1.72706	0.0418891	1.11188	up	--	--	Molecular Function: phospholipid binding (GO:0005543);; Molecular Function: protein domain specific binding (GO:0019904);; Biological Process: lamellipodium assembly (GO:0030032);; Molecular Function: Rac guanyl-nucleotide exchange factor activity (GO:0030676);; Biological Process: regulation of Rho protein signal transduction (GO:0035023);; Biological Process: filopodium assembly (GO:0046847);;	K05769|0|gga:424761|K05769 Rho guanine nucleotide exchange factor 4/29 | (RefSeq) ARHGEF4; Rho guanine nucleotide exchange factor 4	Regulation of actin cytoskeleton (ko04810)	[T]	Signal transduction mechanisms	RhoGEF domain;; Variant SH3 domain;; PH domain;; SH3 domain;; Variant SH3 domain	Rho guanine nucleotide exchange factor 6 GN=ARHGEF6 OS=Gallus gallus (Chicken) PE=2 SV=1	T	Signal transduction mechanisms	PREDICTED: uro-adherence factor A isoform X8 [Gallus gallus]
gene1308	542	1137	833	821	656	171	276	282	90	543	3.48373	6.65989	4.81516	4.16845	4.11505	1.29254	1.5317	1.79744	0.677139	3.45485	0.0224301	-1.11344	down	--	--	--	K08440|0|gga:418288|K08440 G protein-coupled receptor 162 | (RefSeq) GPR162, GPR153; G protein-coupled receptor 162	--	--	--	7 transmembrane receptor (rhodopsin family)	--	T	Signal transduction mechanisms	PREDICTED: probable G-protein coupled receptor 162 [Gallus gallus]
gene13086	3021	2865	3429	2679	3152	4858	6340	4214	3843	4495	10.6296	9.18008	9.99629	6.88275	10.6606	21.7901	19.7391	14.4767	14.6125	14.261	0.000151773	1.14556	up	[OC]	Posttranslational modification, protein turnover, chaperones;; Energy production and conversion	Molecular Function: zinc ion binding (GO:0008270);;	K20178|0|gga:429138|K20178 vacuolar protein sorting-associated protein 8 | (RefSeq) VPS8; VPS8, CORVET complex subunit	--	[U]	Intracellular trafficking, secretion, and vesicular transport	Golgi CORVET complex core vacuolar protein 8;; Region in Clathrin and VPS;; Thioredoxin	Thioredoxin GN=TXN OS=Gallus gallus (Chicken) PE=3 SV=2	U	Intracellular trafficking, secretion, and vesicular transport	PREDICTED: vacuolar protein sorting-associated protein 8 homolog isoform X2 [Gallus gallus]
gene13092	279	277	292	222	349	301	299	415	336	784	3.36018	3.08969	3.22126	2.75877	4.78705	3.83301	2.55948	4.92527	4.67329	9.41707	0.0300865	1.04586	up	[S]	Function unknown	--	--	--	[S]	Function unknown	SNARE associated Golgi protein	Transmembrane protein 41A-B {ECO:0000312|EMBL:AAH68328.1} (Precursor) OS=Danio rerio (Zebrafish) PE=2 SV=1	S	Function unknown	transmembrane protein 41A isoform 1 [Gallus gallus]
gene1312	99210	136872	106564	112839	83506	212271	297278	276331	228214	253193	1553.93	1954.05	1502.31	1397.35	1277.92	3919.77	4031.43	4306.07	4214.44	3931.66	2.85837e-07	1.74249	up	[G]	Carbohydrate transport and metabolism	Molecular Function: triose-phosphate isomerase activity (GO:0004807);; Cellular Component: cytosol (GO:0005829);; Biological Process: gluconeogenesis (GO:0006094);; Biological Process: glycolytic process (GO:0006096);; Biological Process: pentose-phosphate shunt (GO:0006098);; Biological Process: embryo development (GO:0009790);; Biological Process: glyceraldehyde-3-phosphate metabolic process (G…	K01803|0|gga:396435|K01803 triosephosphate isomerase (TIM) [EC:5.3.1.1] | (RefSeq) TPI1; triosephosphate isomerase 1	Glycolysis / Gluconeogenesis (ko00010);; Fructose and mannose metabolism (ko00051);; Inositol phosphate metabolism (ko00562);; Carbon metabolism (ko01200);; Biosynthesis of amino acids (ko01230)	[G]	Carbohydrate transport and metabolism	Triosephosphate isomerase	Triosephosphate isomerase GN=TPI1 OS=Gallus gallus (Chicken) PE=1 SV=2	G	Carbohydrate transport and metabolism	triosephosphate isomerase [Gallus gallus]
gene13174	19127	16969	23269	22988	14958	6569	8316	6375	4171	8477	184.377	149.055	202.083	175.262	140.942	74.6421	69.4276	61.1308	47.4395	80.9875	0.00432158	-1.02797	down	--	--	Molecular Function: hormone activity (GO:0005179);; Cellular Component: collagen trimer (GO:0005581);; Cellular Component: extracellular space (GO:0005615);; Cellular Component: endoplasmic reticulum (GO:0005783);; Biological Process: fatty acid beta-oxidation (GO:0006635);; Biological Process: response to glucose (GO:0009749);; Biological Process: positive regulation of protein kinase A signalin…	K07296|2.77366e-145|gga:404536|K07296 adiponectin | (RefSeq) ADIPOQ; adiponectin, C1Q and collagen domain containing	PPAR signaling pathway (ko03320);; Adipocytokine signaling pathway (ko04920)	--	--	C1q domain;; Collagen triple helix repeat (20 copies)	Otolin-1 (Precursor) GN=otol1 OS=Oncorhynchus keta (Chum salmon) PE=1 SV=1	W	Extracellular structures	adiponectin precursor [Gallus gallus]
gene13202	449	824	390	572	657	184	187	165	212	202	3.66548	6.10837	2.85249	4.13853	5.15338	1.73031	1.27186	1.37075	2.0121	1.57975	0.0299577	-1.08877	down	--	--	Biological Process: protein ubiquitination (GO:0016567);; Biological Process: intracellular signal transduction (GO:0035556);;	K10343|0|mgp:100540802|K10343 SPRY domain-containing SOCS box protein 1/4 | (RefSeq) SPSB4; splA/ryanodine receptor domain and SOCS box containing 4	--	[R]	General function prediction only	SPRY domain;; SOCS box	F-box/SPRY domain-containing protein 1 GN=fbxo45 OS=Danio rerio (Zebrafish) PE=2 SV=2	R	General function prediction only	PREDICTED: SPRY domain-containing SOCS box protein 4 isoform X3 [Gallus gallus]
gene13219	1445	1557	904	1027	809	460	304	365	204	559	8.81415	5.13325	2.94261	5.50872	2.85879	1.96179	1.05919	1.31287	1.14616	2.00843	0.0132718	-1.1193	down	--	--	Molecular Function: voltage-gated potassium channel activity (GO:0005249);; Biological Process: ion transport (GO:0006811);; Cellular Component: membrane (GO:0016020);;	K04898|1.32182e-91|gga:771271|K04898 potassium voltage-gated channel Isk-related subfamily E member 4 | (RefSeq) KCNE4; potassium voltage-gated channel subfamily E regulatory subunit 4	--	--	--	Slow voltage-gated potassium channel	--	P	Inorganic ion transport and metabolism	PREDICTED: potassium voltage-gated channel subfamily E member 4 [Gallus gallus]
gene13225	2989	5520	4624	4508	2020	921	1166	1548	910	2095	30.2535	51.4193	42.4062	36.0489	19.9601	11.2074	10.4301	15.9597	11.0717	21.4719	0.0128383	-1.07252	down	[O]	Posttranslational modification, protein turnover, chaperones	Molecular Function: serine-type endopeptidase inhibitor activity (GO:0004867);; Molecular Function: receptor binding (GO:0005102);; Cellular Component: extracellular region (GO:0005576);; Cellular Component: cytosol (GO:0005829);; Molecular Function: heparin binding (GO:0008201);; Biological Process: negative regulation of cell proliferation (GO:0008285);; Biological Process: negative regulation …	K16643|0|gga:424805|K16643 glia-derived nexin | (RefSeq) SERPINE2; serpin family E member 2	--	[V]	Defense mechanisms	Serpin (serine protease inhibitor)	Neuroserpin (Precursor) GN=SERPINI1 OS=Gallus gallus (Chicken) PE=1 SV=1	V	Defense mechanisms	plasminogen activator inhibitor type 1, member 2 precursor [Gallus gallus]
gene1325	775	693	1464	1060	1146	212	179	303	229	483	4.19742	3.50448	7.57721	4.76054	6.43492	1.39888	0.866303	1.69103	1.49264	2.89216	0.000420507	-1.37978	down	--	--	--	--	--	[W]	Extracellular structures	Cadherin domain;; Concanavalin A-like lectin/glucanases superfamily	Protocadherin-15 (Precursor) GN=Pcdh15 OS=Gallus gallus (Chicken) PE=1 SV=1	W	Extracellular structures	PREDICTED: calsyntenin-3 [Gallus gallus]
gene13276	1039	1065	993	984	795	256	247	338	230	441	5.88645	5.7046	4.55984	4.26476	4.48579	1.53818	1.08223	1.72041	1.37152	2.37303	0.00328535	-1.20037	down	[P]	Inorganic ion transport and metabolism	Biological Process: regulation of pH (GO:0006885);; Molecular Function: sodium:proton antiporter activity (GO:0015385);; Cellular Component: integral component of membrane (GO:0016021);;	K14725|0|gga:424772|K14725 solute carrier family 9 (sodium/hydrogen exchanger), member 9 | (RefSeq) SLC9A9; solute carrier family 9 member A9	--	[P]	Inorganic ion transport and metabolism	Sodium/hydrogen exchanger family	Sodium/hydrogen exchanger 8 OS=Gallus gallus (Chicken) PE=2 SV=1	P	Inorganic ion transport and metabolism	sodium/hydrogen exchanger 9 [Gallus gallus]
gene13289	65	83	123	236	66	0	0	0	7	0	0.370541	0.520901	0.796557	1.43115	0.406787	0	0	0	0.026844	0	1.96685e-08	-5.55227	down	[R]	General function prediction only	--	K09225|0|cmy:102938738|K09225 zinc finger protein ZIC 4 | (RefSeq) ZIC4; Zic family member 4	--	[R]	General function prediction only	Zinc-finger double domain;; Zinc finger, C2H2 type;; C2H2-type zinc finger;; Zinc-finger double-stranded RNA-binding	Zinc finger protein ZIC 4 {ECO:0000303|PubMed:16871625} GN=zic4 OS=Xenopus laevis (African clawed frog) PE=2 SV=1	K	Transcription	PREDICTED: zinc finger protein ZIC 4 [Chelonia mydas]
gene13290	477	346	469	479	376	0	0	0	0	0	3.73667	2.63774	3.12089	2.9273	2.916	0	0	0	0	0	5.41181e-36	#NAME?	down	[R]	General function prediction only	Biological Process: neural plate development (GO:0001840);; Molecular Function: DNA binding (GO:0003677);; Molecular Function: transcription factor activity, sequence-specific DNA binding (GO:0003700);; Cellular Component: nucleus (GO:0005634);; Cellular Component: cytoplasm (GO:0005737);; Biological Process: behavior (GO:0007610);; Biological Process: regulation of smoothened signaling pathway (…	K09224|0|gga:374103|K09224 zinc finger protein ZIC 1 | (RefSeq) ZIC1; Zic family member 1	--	[R]	General function prediction only	Zinc-finger double domain;; Zinc finger, C2H2 type;; C2H2-type zinc finger;; Zinc-finger double-stranded RNA-binding	Zinc finger protein ZIC 1 GN=ZIC1 OS=Gallus gallus (Chicken) PE=1 SV=1	K	Transcription	zinc finger protein ZIC 1 [Gallus gallus]
gene13300	75	66	60	78	63	19	11	0	6	36	0.40945	0.328221	0.293266	0.339553	0.337614	0.120145	0.052174	0	0.038455	0.193768	0.0186156	-1.8021	down	--	--	--	K08098|0|gga:429144|K08098 phosphatidylinositol glycan, class Z [EC:2.4.1.-] | (RefSeq) PIGZ; phosphatidylinositol glycan anchor biosynthesis class Z	Glycosylphosphatidylinositol(GPI)-anchor biosynthesis (ko00563)	[G]	Carbohydrate transport and metabolism	Alg9-like mannosyltransferase family	--	G	Carbohydrate transport and metabolism	PREDICTED: GPI mannosyltransferase 4 [Gallus gallus]
gene13305	95	95	6	28	65	202	159	111	207	252	1.01675	0.981002	0.060779	0.237598	0.467602	2.5657	1.3415	1.3255	2.52373	3.41743	0.000256119	2.15585	up	[M]	Cell wall/membrane/envelope biogenesis	Biological Process: response to reactive oxygen species (GO:0000302);; Molecular Function: transporter activity (GO:0005215);; Cellular Component: extracellular space (GO:0005615);; Biological Process: glucose metabolic process (GO:0006006);; Biological Process: negative regulation of platelet-derived growth factor receptor signaling pathway (GO:0010642);; Molecular Function: cholesterol binding …	K03098|6.53586e-129|gga:424893|K03098 apolipoprotein D and lipocalin family protein | (RefSeq) APOD, lipocalin; apolipoprotein D	--	[M]	Cell wall/membrane/envelope biogenesis	Lipocalin-like domain;; Lipocalin / cytosolic fatty-acid binding protein family;; Triabin	Purpurin (Precursor) OS=Gallus gallus (Chicken) PE=1 SV=1	M	Cell wall/membrane/envelope biogenesis	apolipoprotein D precursor [Gallus gallus]
gene13306	6412	7245	6347	5865	5595	10655	13848	11632	8767	12273	61.0104	63.5445	54.3433	44.2556	52.0317	118.994	113.814	110.187	98.1818	116.559	2.30334e-05	1.35412	up	--	--	Molecular Function: protein phosphatase inhibitor activity (GO:0004864);; Biological Process: regulation of signal transduction (GO:0009966);; Biological Process: regulation of phosphoprotein phosphatase activity (GO:0043666);;	K16833|1.52693e-100|gga:424894|K16833 protein phosphatase inhibitor 2 | (RefSeq) PPP1R2; protein phosphatase 1 regulatory inhibitor subunit 2	--	[OT]	Posttranslational modification, protein turnover, chaperones;; Signal transduction mechanisms	Protein phosphatase inhibitor 2 (IPP-2)	--	T	Signal transduction mechanisms	protein phosphatase inhibitor 2 [Gallus gallus]
gene13316	868	757	1592	1215	587	230	312	131	187	497	1.29621	1.03079	5.74218	1.43523	0.856879	0.403472	0.403513	0.845056	0.32869	0.73525	0.0043738	-1.40309	down	[S]	Function unknown	--	--	--	[R]	General function prediction only	Leucine rich repeat;; Leucine Rich repeats (2 copies);; Leucine rich repeats (6 copies);; Leucine Rich Repeat;; Leucine-rich repeat;; Leucine rich repeat	Leucine-rich repeat-containing G-protein coupled receptor 4 (Precursor) GN=lgr4 OS=Xenopus tropicalis (Western clawed frog) PE=1 SV=1	R	General function prediction only	PREDICTED: uncharacterized protein LOC101814551 [Ficedula albicollis]
gene13338	193	246	538	324	296	385	618	739	385	559	0.749951	0.838442	1.76594	0.947181	1.04453	1.72096	2.02235	3.04375	1.65607	2.04279	0.0045733	1.25641	up	--	--	--	K10149|0|apla:101794454|K10149 tumor protein p63 | (RefSeq) TP63; tumor protein p63	--	--	--	P53 DNA-binding domain;; P53 tetramerisation motif;; SAM domain (Sterile alpha motif)	Cellular tumor antigen p53 GN=tp53 OS=Oncorhynchus mykiss (Rainbow trout) PE=2 SV=1	K	Transcription	PREDICTED: tumor protein 63 isoform X1 [Meleagris gallopavo]
gene13401	1593	1359	1863	2403	1994	3582	3690	3166	2481	3258	7.14278	5.47283	7.59555	8.35965	8.39906	18.5863	14.0141	13.8228	12.8267	13.9484	3.33715e-06	1.32895	up	[E]	Amino acid transport and metabolism	--	K09605|0|gga:424946|K09605 arginyl aminopeptidase-like 1 [EC:3.4.11.-] | (RefSeq) RNPEPL1; arginyl aminopeptidase like 1	--	[IOVE]	Lipid transport and metabolism;; Posttranslational modification, protein turnover, chaperones;; Defense mechanisms;; Amino acid transport and metabolism	Peptidase family M1;; Leukotriene A4 hydrolase, C-terminal;; Peptidase MA superfamily	Aminopeptidase N {ECO:0000312|EMBL:ACZ95799.1} GN=ANPEP OS=Gallus gallus (Chicken) PE=1 SV=1	EIOV	Amino acid transport and metabolism;; Lipid transport and metabolism;; Posttranslational modification, protein turnover, chaperones;; Defense mechanisms	PREDICTED: arginyl aminopeptidase (aminopeptidase B)-like 1, partial [Gallus gallus]
gene13478	2386	2957	3078	4315	3596	8328	16810	5404	8519	3946	8.12282	9.35706	9.6084	11.7862	12.1349	33.664	50.1053	19.2603	34.4454	13.3151	0.0129065	1.91857	up	[I]	Lipid transport and metabolism	Molecular Function: carboxylic ester hydrolase activity (GO:0004091);; Biological Process: protein dephosphorylation (GO:0006470);; Biological Process: xenobiotic metabolic process (GO:0006805);; Cellular Component: integral component of membrane (GO:0016021);; Molecular Function: serine hydrolase activity (GO:0017171);; Molecular Function: phosphate ion binding (GO:0042301);;	K14349|0|gga:429158|K14349 neutral cholesterol ester hydrolase 1 [EC:3.1.1.-] | (RefSeq) NCEH1, AADACL1; neutral cholesterol ester hydrolase 1	--	[V]	Defense mechanisms	alpha/beta hydrolase fold	--	V	Defense mechanisms	PREDICTED: neutral cholesterol ester hydrolase 1 [Gallus gallus]
gene13590	9392	17452	19543	17991	17698	27689	33500	26072	22573	13018	41.3815	70.8517	77.6983	62.017	76.7569	131.172	114.303	105.63	107.266	57.6635	0.00940866	1.1225	up	--	--	Biological Process: regulation of alternative mRNA splicing, via spliceosome (GO:0000381);; Molecular Function: double-stranded RNA binding (GO:0003725);; Cellular Component: nucleus (GO:0005634);; Biological Process: mRNA splice site selection (GO:0006376);; Biological Process: skeletal muscle tissue development (GO:0007519);; Cellular Component: cytoplasmic stress granule (GO:0010494);; Molecul…	K14943|2.8479e-86|tgu:100218825|K14943 muscleblind | (RefSeq) MBNL1; muscleblind like splicing regulator 1	--	[K]	Transcription	--	Muscleblind-like protein 1 GN=MBNL1 OS=Gallus gallus (Chicken) PE=2 SV=1	A	RNA processing and modification	PREDICTED: LOW QUALITY PROTEIN: muscleblind-like protein 1 [Tinamus guttatus]
gene13601	588	394	682	558	477	1338	1516	1479	1391	1301	3.64587	2.35766	4.1543	2.93179	3.10099	10.2357	8.58734	9.21771	9.86383	8.10313	2.87422e-10	1.90119	up	--	--	--	K04299|0|gga:101749627|K04299 purinergic receptor P2Y, G protein-coupled, 14 | (RefSeq) P2RY14; purinergic receptor P2Y, G-protein coupled, 14	Neuroactive ligand-receptor interaction (ko04080)	--	--	7 transmembrane receptor (rhodopsin family)	G-protein coupled receptor 183 GN=gpr183 OS=Salmo salar (Atlantic salmon) PE=2 SV=1	T	Signal transduction mechanisms	PREDICTED: P2Y purinoceptor 14 [Gallus gallus]
gene13603	76	16	38	64	40	76	130	120	107	71	0.53048	0.097406	0.240639	0.354995	0.27191	0.631173	0.793211	0.829271	0.891584	0.496265	0.0244625	1.61893	up	--	--	Cellular Component: plasma membrane (GO:0005886);; Cellular Component: microvillus (GO:0005902);; Biological Process: actin filament organization (GO:0007015);; Biological Process: sensory perception of sound (GO:0007605);; Biological Process: positive regulation of lamellipodium assembly (GO:0010592);; Cellular Component: lamellipodium (GO:0030027);; Biological Process: photoreceptor cell mainte…	--	--	--	--	--	--	S	Function unknown	PREDICTED: clarin-1 isoform X3 [Gallus gallus]
gene13605	88	37	78	182	32	146	265	132	148	147	0.259768	0.097377	0.204397	0.418635	0.089041	0.499059	0.667063	0.381516	0.505996	0.423465	0.0212476	1.5539	up	--	--	--	--	--	[S]	Function unknown	Domain of unknown function (DUF4205);; Domain of unknown function (DUF4205)	Protein FAM188B GN=fam188b OS=Xenopus tropicalis (Western clawed frog) PE=2 SV=1	S	Function unknown	PREDICTED: protein FAM188B2-like isoform X2 [Gallus gallus]
gene13715	28726	31754	40117	31757	40009	55126	58187	51922	43016	46517	95.4301	94.454	118.245	86.3584	130.592	216.81	169.75	170.446	170.237	155.376	0.00525379	1.07501	up	--	--	Molecular Function: protein serine/threonine kinase activity (GO:0004674);; Molecular Function: ATP binding (GO:0005524);; Cellular Component: nucleus (GO:0005634);; Biological Process: protein phosphorylation (GO:0006468);; Biological Process: heart development (GO:0007507);;	K08868|0|gga:768936|K08868 alpha-kinase | (RefSeq) ALPK3; alpha kinase 3	--	--	--	Alpha-kinase family;; Immunoglobulin I-set domain;; Immunoglobulin domain;; Immunoglobulin V-set domain;; Immunoglobulin domain	Telokin OS=Meleagris gallopavo (Common turkey) PE=1 SV=1	T	Signal transduction mechanisms	PREDICTED: alpha-protein kinase 3 isoform X3 [Gallus gallus]
gene1374	5541	13333	7143	9197	8164	2552	3017	2166	1301	2794	33.3686	73.1821	38.7156	43.7858	48.0318	18.1147	15.7289	12.9718	9.2362	16.678	0.00118336	-1.38452	down	--	--	Biological Process: negative regulation of transcription from RNA polymerase II promoter (GO:0000122);; Molecular Function: transcription regulatory region sequence-specific DNA binding (GO:0000976);; Molecular Function: RNA polymerase II transcription corepressor activity (GO:0001106);; Molecular Function: transcription factor activity, sequence-specific DNA binding (GO:0003700);; Molecular Func…	K10182|0|gga:418313|K10182 T-box protein 15 | (RefSeq) TBX15; T-box 15	--	[K]	Transcription	T-box	T-box transcription factor TBX20 GN=TBX20 OS=Gallus gallus (Chicken) PE=2 SV=1	K	Transcription	PREDICTED: T-box transcription factor TBX15 [Gallus gallus]
gene13746	186583	178479	194392	244754	147671	588932	819075	655533	597732	525911	1620.04	1388.51	1572.85	1713.84	1219.8	6103.29	6234.32	6000.12	5662.9	4495.37	1.36218e-12	2.26884	up	[G]	Carbohydrate transport and metabolism	Molecular Function: magnesium ion binding (GO:0000287);; Molecular Function: pyruvate kinase activity (GO:0004743);; Molecular Function: ATP binding (GO:0005524);; Cellular Component: cytosol (GO:0005829);; Biological Process: glycolytic process (GO:0006096);; Molecular Function: potassium ion binding (GO:0030955);; Biological Process: small molecule metabolic process (GO:0044281);;	K00873|0|gga:396456|K00873 pyruvate kinase [EC:2.7.1.40] | (RefSeq) PKM, PKLR, PKM2; pyruvate kinase, muscle	Glycolysis / Gluconeogenesis (ko00010);; Purine metabolism (ko00230);; Pyruvate metabolism (ko00620);; Carbon metabolism (ko01200);; Biosynthesis of amino acids (ko01230)	[G]	Carbohydrate transport and metabolism	Pyruvate kinase, barrel domain;; Pyruvate kinase, alpha/beta domain	Pyruvate kinase PKM GN=PKM OS=Gallus gallus (Chicken) PE=2 SV=2	G	Carbohydrate transport and metabolism	pyruvate kinase PKM [Gallus gallus]
gene13764	3397	4699	2258	4067	2467	800	930	1020	840	2515	29.8657	37.9268	16.7078	29.4906	20.396	8.52879	7.44453	8.77336	8.92636	22.3457	0.0437161	-1.00948	down	--	--	--	K14678|0|gga:426411|K14678 lysyl oxidase-like protein 1 [EC:1.4.3.-] | (RefSeq) LOXL1; lysyl oxidase like 1	--	--	--	Lysyl oxidase	Protein-lysine 6-oxidase (Precursor) GN=LOX OS=Gallus gallus (Chicken) PE=2 SV=1	O	Posttranslational modification, protein turnover, chaperones	PREDICTED: lysyl oxidase homolog 1 [Haliaeetus leucocephalus]
gene1379	4967	4080	5900	6405	5976	16072	8853	17682	9740	12172	15.4907	14.5674	17.2734	17.2548	22.308	81.4549	23.2435	77.8113	48.3805	45.7638	0.000144053	1.77315	up	--	--	--	--	--	[S]	Function unknown	Domain of unknown function (DUF1693)	Protein FAM46C GN=FAM46C OS=Gallus gallus (Chicken) PE=2 SV=1	S	Function unknown	protein FAM46C [Gallus gallus]
gene13829	4726	5829	5373	5876	4489	8290	10613	8894	8004	8176	28.2652	31.7797	28.9234	27.7869	26.2298	58.4548	54.9589	52.9263	56.4455	48.4831	0.000115295	1.25918	up	[S]	Function unknown	Biological Process: protein polyubiquitination (GO:0000209);; Cellular Component: nucleus (GO:0005634);; Cellular Component: cytoplasm (GO:0005737);; Biological Process: nucleocytoplasmic transport (GO:0006913);; Biological Process: cellular response to starvation (GO:0009267);; Biological Process: regulation of myotube differentiation (GO:0010830);; Biological Process: positive regulation of pro…	K10302|0|gga:415355|K10302 F-box protein 22 | (RefSeq) FBXO22, null; F-box protein 22	--	--	--	FIST C domain;; F-box domain	--	R	General function prediction only	F-box only protein 22 [Gallus gallus]
gene13841	3566	5541	3134	8207	5414	1504	1846	1141	1620	1560	29.6323	40.803	24.8022	44.5132	35.4613	12.8324	14.721	9.93125	15.4935	13.833	0.00245059	-1.21973	down	[O]	Posttranslational modification, protein turnover, chaperones	Molecular Function: ATP binding (GO:0005524);; Biological Process: protein folding (GO:0006457);; Biological Process: response to heat (GO:0009408);; Molecular Function: heat shock protein binding (GO:0031072);; Molecular Function: metal ion binding (GO:0046872);; Molecular Function: unfolded protein binding (GO:0051082);;	K09505|0|gga:415360|K09505 DnaJ homolog subfamily A member 4 | (RefSeq) DNAJA4; DnaJ heat shock protein family (Hsp40) member A4	--	[O]	Posttranslational modification, protein turnover, chaperones	DnaJ C terminal domain;; DnaJ central domain	DnaJ homolog subfamily B member 6-A GN=dnajb6-a OS=Xenopus laevis (African clawed frog) PE=2 SV=1	O	Posttranslational modification, protein turnover, chaperones	PREDICTED: dnaJ homolog subfamily A member 4, partial [Gallus gallus]
gene13846	913	2174	842	869	837	55	79	95	166	26	5.95924	13.643	5.18096	4.72086	5.5806	0.393744	0.439346	0.63469	1.34374	0.143964	0.000125977	-3.15932	down	[RTKL]	General function prediction only;; Signal transduction mechanisms;; Transcription;; Replication, recombination and repair	--	K08803|0|clv:102095370|K08803 death-associated protein kinase [EC:2.7.11.1] | (RefSeq) DAPK2; death associated protein kinase 2	--	[T]	Signal transduction mechanisms	Protein kinase domain;; Protein tyrosine kinase	Myosin light chain kinase, smooth muscle, deglutamylated form GN=Mylk OS=Gallus gallus (Chicken) PE=1 SV=2	T	Signal transduction mechanisms	PREDICTED: death-associated protein kinase 3 isoform X4 [Gallus gallus]
gene13852	2175	3827	2726	2860	2711	3714	6576	6004	4832	7347	69.4574	111.396	78.3628	72.2177	84.5687	139.825	181.828	190.771	181.94	232.613	2.45597e-07	1.47832	up	[J]	Translation, ribosomal structure and biogenesis	Molecular Function: structural constituent of ribosome (GO:0003735);; Cellular Component: ribosome (GO:0005840);; Biological Process: translation (GO:0006412);; Molecular Function: metal ion binding (GO:0046872);;	K02978|2.36414e-46|gga:415372|K02978 small subunit ribosomal protein S27e | (RefSeq) RPS27L; ribosomal protein S27 like	Ribosome (ko03010)	[J]	Translation, ribosomal structure and biogenesis	Ribosomal protein S27	40S ribosomal protein S27 GN=rps27 OS=Xenopus laevis (African clawed frog) PE=3 SV=2	J	Translation, ribosomal structure and biogenesis	40S ribosomal protein S27-like [Gallus gallus]
gene13854	475956	727256	562865	771235	394374	726334	963053	878586	868828	929142	4192.33	5981.84	4745.34	5533	3154.01	7250.9	6941.34	6882.87	7602.55	7615.47	0.00179822	1.1022	up	--	--	Molecular Function: actin binding (GO:0003779);; Cellular Component: cytoplasm (GO:0005737);; Cellular Component: cytoskeleton (GO:0005856);;	--	--	[Z]	Cytoskeleton	Tropomyosin;; Tropomyosin like;; Laminin Domain II	Tropomyosin alpha-1 chain GN=TPM1 OS=Coturnix coturnix japonica (Japanese quail) PE=2 SV=1	Z	Cytoskeleton	alpha-tropomyosin [Coturnix coturnix]
gene13950	1978	1714	1398	2793	1260	4053	4680	2105	3867	3653	12.857	11.0864	8.19016	14.4741	8.02498	30.1383	26.6267	13.5298	28.6222	22.8543	4.96691e-05	1.54201	up	--	--	--	--	--	--	--	Domain of unknown function (DUF758)	Tumor necrosis factor alpha-induced protein 8-like protein 3 GN=tnfaip8l3 OS=Xenopus laevis (African clawed frog) PE=2 SV=1	R	General function prediction only	PREDICTED: tumor necrosis factor, alpha-induced protein 8-like 3 [Gallus gallus]
gene1396	669	313	565	623	426	1293	1601	1147	483	1019	1.01414	0.369528	0.922838	0.79705	0.923494	2.08892	2.93235	1.64971	0.886774	1.43382	0.000419017	1.58287	up	[R]	General function prediction only	Molecular Function: DNA binding (GO:0003677);; Molecular Function: DNA-directed DNA polymerase activity (GO:0003887);; Molecular Function: ATP binding (GO:0005524);; Biological Process: DNA replication (GO:0006260);; Molecular Function: ATP-dependent helicase activity (GO:0008026);;	K02349|0|gga:418326|K02349 DNA polymerase theta [EC:2.7.7.7] | (RefSeq) POLQ; DNA polymerase theta	--	[R]	General function prediction only	DNA polymerase family A;; DEAD/DEAH box helicase;; Helicase conserved C-terminal domain;; Helix-hairpin-helix domain	Probable ATP-dependent DNA helicase HFM1 GN=hfm1 OS=Xenopus tropicalis (Western clawed frog) PE=2 SV=1	L	Replication, recombination and repair	PREDICTED: DNA polymerase theta isoform X2 [Gallus gallus]
gene1397	379	117	296	207	206	908	1567	818	248	521	1.64541	0.452054	1.17544	0.706621	1.00036	4.78103	7.05399	4.1606	1.21041	3.17287	0.00886819	2.21077	up	--	--	--	K08518|0|gga:418327|K08518 syntaxin-binding protein 5 | (RefSeq) STXBP5L; syntaxin binding protein 5 like	--	[U]	Intracellular trafficking, secretion, and vesicular transport	LLGL2;; WD domain, G-beta repeat;; Lethal giant larvae(Lgl) like, C-terminal	Syntaxin-binding protein 5-like GN=stxbp5l OS=Danio rerio (Zebrafish) PE=3 SV=1	U	Intracellular trafficking, secretion, and vesicular transport	PREDICTED: syntaxin-binding protein 5-like isoform X1 [Meleagris gallopavo]
gene13970	26551	26940	20786	25404	13961	5990	5720	8696	4582	11628	56.7529	52.5242	39.9637	42.9224	29.1481	15.0969	10.599	18.4472	11.5414	24.5859	0.00118892	-1.15314	down	--	--	--	K06825|0|mgp:723984|K06825 fibrillin 1 | (RefSeq) FBN1; fibrillin 1	--	[T]	Signal transduction mechanisms	Calcium-binding EGF domain;; Complement Clr-like EGF-like;; EGF-like domain;; TB domain;; Coagulation Factor Xa inhibitory site;; EGF domain	Notch 1 intracellular domain (Precursor) GN=notch1 OS=Xenopus tropicalis (Western clawed frog) PE=1 SV=2	T	Signal transduction mechanisms	PREDICTED: fibrillin-1 [Meleagris gallopavo]
gene13978	709	613	859	1044	575	146	105	262	222	319	11.3691	9.04056	12.3697	13.5196	8.68193	2.65585	1.60965	4.38883	4.33598	5.20678	0.00222497	-1.32465	down	--	--	Molecular Function: growth factor activity (GO:0008083);;	K04358|9.59443e-129|mgp:100550759|K04358 fibroblast growth factor | (RefSeq) FGF7; fibroblast growth factor 7	MAPK signaling pathway (ko04010);; Regulation of actin cytoskeleton (ko04810)	[T]	Signal transduction mechanisms	Fibroblast growth factor	Fibroblast growth factor 9 (Precursor) GN=fgf9 OS=Xenopus laevis (African clawed frog) PE=2 SV=1	T	Signal transduction mechanisms	keratinocyte growth factor [Gallus gallus]
gene14000	753	930	455	1010	1352	159	167	170	251	212	4.04784	4.55629	2.19917	4.28974	7.09802	1.00487	0.775747	0.909198	1.58973	1.12578	0.00195122	-1.71479	down	--	--	--	K15010|0|mgp:100542956|K15010 homer | (RefSeq) HOMER2; homer scaffolding protein 2	FoxO signaling pathway (ko04068)	--	--	WH1 domain;; DMPK coiled coil domain like	--	T	Signal transduction mechanisms	PREDICTED: homer protein homolog 2 [Melopsittacus undulatus]
gene14069	4535	2260	2060	4599	4118	211	392	126	178	218	18.2166	10.2465	7.90485	14.6411	16.6952	1.26213	1.95888	0.604187	0.75456	1.14566	1.369e-09	-3.49101	down	[E]	Amino acid transport and metabolism	Molecular Function: metallocarboxypeptidase activity (GO:0004181);; Biological Process: proteolysis (GO:0006508);; Molecular Function: zinc ion binding (GO:0008270);;	--	--	[E]	Amino acid transport and metabolism	Zinc carboxypeptidase	Cytosolic carboxypeptidase 1 GN=agtpbp1 OS=Danio rerio (Zebrafish) PE=2 SV=1	E	Amino acid transport and metabolism	PREDICTED: cytosolic carboxypeptidase 4 isoform X1 [Gallus gallus]
gene14073	5	11	11	13	0	146	442	432	169	110	0.011416	0.026013	0.026622	0.026987	0	0.478538	1.06857	1.58766	0.554153	0.305	1.53872e-07	5.56576	up	[GEPR]	Carbohydrate transport and metabolism;; Amino acid transport and metabolism;; Inorganic ion transport and metabolism;; General function prediction only	Cellular Component: synaptic vesicle (GO:0008021);; Cellular Component: integral component of membrane (GO:0016021);; Molecular Function: transmembrane transporter activity (GO:0022857);; Biological Process: transmembrane transport (GO:0055085);;	K06258|0|gga:427508|K06258 MFS transporter, VNT family, synaptic vesicle glycoprotein 2 | (RefSeq) SV2B; synaptic vesicle glycoprotein 2B	ECM-receptor interaction (ko04512)	[R]	General function prediction only	Major Facilitator Superfamily;; Sugar (and other) transporter;; Pentapeptide repeats (9 copies)	Synaptic vesicle 2-related protein GN=svop OS=Xenopus laevis (African clawed frog) PE=2 SV=1	R	General function prediction only	PREDICTED: synaptic vesicle glycoprotein 2B isoform X4 [Gallus gallus]
gene14077	1691	2637	1919	1986	1771	416	783	328	254	752	21.1228	21.4659	17.1548	20.6643	20.8724	6.99549	9.44785	5.12249	3.34043	10.052	1.10871e-06	-1.53119	down	--	--	Biological Process: ganglioside biosynthetic process (GO:0001574);; Molecular Function: alpha-N-acetylneuraminate alpha-2,8-sialyltransferase activity (GO:0003828);; Biological Process: N-glycan processing (GO:0006491);; Cellular Component: integral component of Golgi membrane (GO:0030173);;	K06612|0|gga:414336|K06612 alpha-N-acetyl-neuraminate alpha-2,8-sialyltransferase (sialyltransferase 8B) [EC:2.4.99.-] | (RefSeq) ST8SIA2, SIAT8B; ST8 alpha-N-acetyl-neuraminide alpha-2,8-sialyltransferase 2	--	[G]	Carbohydrate transport and metabolism	Glycosyltransferase family 29 (sialyltransferase)	Alpha-N-acetylneuraminide alpha-2,8-sialyltransferase {ECO:0000250|UniProtKB:Q92185} GN=st8sia1 OS=Xenopus laevis (African clawed frog) PE=1 SV=1	G	Carbohydrate transport and metabolism	alpha-2,8-sialyltransferase 8B precursor [Gallus gallus]
gene14078	3968	3951	3656	4186	4659	980	1195	921	870	1291	18.9296	17.1798	15.6946	15.7862	21.7133	5.50646	4.93226	4.36857	4.89248	6.10362	1.45655e-07	-1.46945	down	--	--	Cellular Component: membrane (GO:0016020);;	--	--	--	--	Protein of unknown function (DUF1180)	Membrane protein FAM174B (Precursor) GN=Fam174b OS=Danio rerio (Zebrafish) PE=2 SV=2	S	Function unknown	PREDICTED: membrane protein FAM174B isoform X3 [Gallus gallus]
gene14094	3265	3799	3746	3244	3353	800	1153	1044	765	1046	46.472	50.7264	48.1878	37.9867	47.553	13.5465	14.738	14.8608	13.0198	15.2253	1.35481e-06	-1.3653	down	--	--	Biological Process: negative regulation of transcription from RNA polymerase II promoter (GO:0000122);; Biological Process: neuron migration (GO:0001764);; Biological Process: maternal placenta development (GO:0001893);; Biological Process: negative regulation of endothelial cell proliferation (GO:0001937);; Molecular Function: retinoic acid binding (GO:0001972);; Molecular Function: steroid horm…	K08548|0|gga:386585|K08548 COUP transcription factor 2 | (RefSeq) NR2F2, COUP-TFII; nuclear receptor subfamily 2 group F member 2	--	[T]	Signal transduction mechanisms	Ligand-binding domain of nuclear hormone receptor;; Zinc finger, C4 type (two domains)	COUP transcription factor 2 GN=NR2F2 OS=Gallus gallus (Chicken) PE=2 SV=1	K	Transcription	PREDICTED: COUP transcription factor 2 isoform X2 [Charadrius vociferus]
gene14103	217	192	289	246	236	480	512	451	393	364	2.97098	2.57887	4.01931	2.87476	3.2819	7.53429	6.48465	6.60931	6.72345	5.3667	0.00312957	1.42267	up	--	--	--	--	--	--	--	--	--	S	Function unknown	PREDICTED: protein FAM169B isoform X2 [Meleagris gallopavo]
gene14104	1177	1567	1548	1441	1459	1727	2573	2325	1624	1930	2.50679	2.82756	3.24683	2.61236	2.9293	4.04029	9.5314	4.59487	3.78959	3.81029	0.000933969	1.00063	up	[O]	Posttranslational modification, protein turnover, chaperones	--	--	--	[O]	Posttranslational modification, protein turnover, chaperones	Pyroglutamyl peptidase	--	O	Posttranslational modification, protein turnover, chaperones	PREDICTED: pyroglutamyl-peptidase 1-like protein [Meleagris gallopavo]
gene14180	1243	1253	986	1336	1138	230	241	299	134	897	5.63995	5.20556	4.01085	4.86315	5.13117	1.22073	0.929575	1.35141	0.7582	4.03092	0.0017137	-1.30818	down	--	--	Biological Process: cell adhesion (GO:0007155);; Biological Process: integrin-mediated signaling pathway (GO:0007229);; Cellular Component: integrin complex (GO:0008305);;	K06587|0|mgp:100547226|K06587 integrin alpha 11 | (RefSeq) ITGA11; integrin subunit alpha 11	Focal adhesion (ko04510);; ECM-receptor interaction (ko04512);; Regulation of actin cytoskeleton (ko04810)	[W]	Extracellular structures	Integrin alpha;; von Willebrand factor type A domain;; FG-GAP repeat;; von Willebrand factor type A domain;; Repeat domain in Vibrio, Colwellia, Bradyrhizobium and Shewanella	Integrin alpha-1 (Fragment) GN=ITGA1 OS=Gallus gallus (Chicken) PE=2 SV=1	W	Extracellular structures	PREDICTED: integrin alpha-11 isoform X8 [Gallus gallus]
gene14210	13	13	13	12	24	4189	3187	3594	4560	4438	0.084314	0.045555	0.047328	0.036841	0.161187	44.1138	24.8106	32.0015	48.0696	39.1922	2.30722e-73	8.56515	up	--	--	Cellular Component: cytoplasm (GO:0005737);; Cellular Component: cytoskeleton (GO:0005856);; Molecular Function: cytoskeletal protein binding (GO:0008092);; Cellular Component: extrinsic component of membrane (GO:0019898);;	--	--	--	--	FERM central domain;; FERM adjacent (FA);; FERM C-terminal PH-like domain	FERM domain-containing protein 3 GN=frmd3 OS=Xenopus tropicalis (Western clawed frog) PE=2 SV=2	R	General function prediction only	PREDICTED: FERM domain-containing protein 5 isoform X3 [Gallus gallus]
gene14238	3107	3123	3399	4460	3214	4608	6208	5377	4619	5354	21.8133	19.7751	21.4492	24.5674	21.9597	38.2706	37.9239	37.6748	38.3282	37.2057	0.000411669	1.11017	up	[O]	Posttranslational modification, protein turnover, chaperones	Molecular Function: protease binding (GO:0002020);; Molecular Function: serine-type endopeptidase activity (GO:0004252);; Molecular Function: serine-type endopeptidase inhibitor activity (GO:0004867);; Cellular Component: extracellular space (GO:0005615);; Cellular Component: trans-Golgi network (GO:0005802);; Biological Process: signal peptide processing (GO:0006465);; Biological Process: proteo…	K01349|0|gga:395457|K01349 furin [EC:3.4.21.75] | (RefSeq) FURIN; furin (paired basic amino acid cleaving enzyme)	Influenza A (ko05164)	[O]	Posttranslational modification, protein turnover, chaperones	Subtilase family;; Proprotein convertase P-domain	Furin-1 (Precursor) GN=furin OS=Xenopus laevis (African clawed frog) PE=2 SV=1	O	Posttranslational modification, protein turnover, chaperones	furin precursor [Gallus gallus]
gene14309	0	0	2	0	0	871	594	554	654	599	0	0	0.016299	0	0	17.4213	7.01138	7.74279	10.8534	7.85569	5.05569e-49	11.2862	up	--	--	Cellular Component: cytoplasm (GO:0005737);; Cellular Component: cytoskeleton (GO:0005856);; Molecular Function: cytoskeletal protein binding (GO:0008092);; Cellular Component: extrinsic component of membrane (GO:0019898);;	--	--	--	--	--	FERM domain-containing protein 3 GN=frmd3 OS=Xenopus tropicalis (Western clawed frog) PE=2 SV=2	R	General function prediction only	PREDICTED: FERM domain-containing protein 5 isoform X5 [Gallus gallus]
gene14341	7843	9107	8459	10493	9324	12484	17488	14287	10516	16081	152.01	160.877	147.549	160.777	176.547	285.242	293.46	275.479	240.284	308.982	0.000809952	1.14055	up	[S]	Function unknown	Cellular Component: mitochondrion (GO:0005739);; Biological Process: ubiquinone biosynthetic process (GO:0006744);;	K18587|0|gga:415636|K18587 ubiquinone biosynthesis protein COQ9 | (RefSeq) COQ9; coenzyme Q9	--	[S]	Function unknown	COQ9	Ubiquinone biosynthesis protein COQ9, mitochondrial (Precursor) GN=coq9 OS=Xenopus tropicalis (Western clawed frog) PE=2 SV=1	S	Function unknown	ubiquinone biosynthesis protein COQ9, mitochondrial [Gallus gallus]
gene14452	5077	6501	6125	5980	5480	7402	11389	8040	6777	7669	31.2555	36.476	33.9374	29.1064	32.9609	53.7232	60.7053	49.2452	49.1891	46.8027	0.00322513	1.00189	up	[O]	Posttranslational modification, protein turnover, chaperones	Biological Process: protein polyubiquitination (GO:0000209);; Molecular Function: ubiquitin-protein transferase activity (GO:0004842);; Molecular Function: receptor activity (GO:0004872);; Molecular Function: zinc ion binding (GO:0008270);; Cellular Component: integral component of endoplasmic reticulum membrane (GO:0030176);; Biological Process: ubiquitin-dependent ERAD pathway (GO:0030433);; Bi…	K10636|0|gga:415697|K10636 autocrine motility factor receptor [EC:2.3.2.27] | (RefSeq) AMFR; autocrine motility factor receptor	Protein processing in endoplasmic reticulum (ko04141)	[O]	Posttranslational modification, protein turnover, chaperones	Ring finger domain;; CUE domain;; Zinc finger, C3HC4 type (RING finger);; Zinc finger, C3HC4 type (RING finger);; RING-H2 zinc finger;; Zinc finger, C3HC4 type (RING finger);; Anaphase-promoting complex subunit 11 RING-H2 finger	E3 ubiquitin-protein ligase synoviolin (Precursor) GN=syvn1 OS=Danio rerio (Zebrafish) PE=2 SV=2	O	Posttranslational modification, protein turnover, chaperones	PREDICTED: E3 ubiquitin-protein ligase AMFR isoform X2 [Gallus gallus]
gene14464	56	73	50	85	64	0	11	12	13	32	0.956529	0.982283	0.968304	1.21584	1.27058	0	0.121811	0.150369	0.225282	0.653656	0.016932	-1.83652	down	--	--	Molecular Function: calcium ion binding (GO:0005509);;	--	--	--	--	EF-hand domain pair;; EF hand;; EF-hand domain pair;; EF-hand domain;; EF hand	--	T	Signal transduction mechanisms	PREDICTED: N-terminal EF-hand calcium-binding protein 2 isoform X6 [Gallus gallus]
gene14507	490	396	337	362	372	120	108	131	64	168	2.06054	0.902532	0.757026	0.714434	0.907574	0.353174	0.231044	0.323779	0.187849	0.414784	0.0372277	-1.25813	down	--	--	Molecular Function: calcium ion binding (GO:0005509);;	K03213|0|apla:101793483|K03213 naked cuticle | (RefSeq) NKD1; naked cuticle homolog 1	Wnt signaling pathway (ko04310)	--	--	--	Protein naked cuticle homolog 1 GN=nkd1 OS=Danio rerio (Zebrafish) PE=2 SV=1	T	Signal transduction mechanisms	PREDICTED: protein naked cuticle homolog 1 isoform X5 [Gallus gallus]
gene14526	25341	22886	28310	22995	19184	55158	66661	62289	51033	37398	123.704	103.799	121.562	86.6839	89.3738	309.208	267.187	296.888	287.192	171.269	6.45745e-07	1.72402	up	--	--	Molecular Function: hydrolase activity, hydrolyzing O-glycosyl compounds (GO:0004553);; Molecular Function: calmodulin binding (GO:0005516);; Biological Process: glycogen metabolic process (GO:0005977);;	K07190|0|gga:415741|K07190 phosphorylase kinase alpha/beta subunit | (RefSeq) PHKB; phosphorylase kinase regulatory subunit beta	Calcium signaling pathway (ko04020);; Insulin signaling pathway (ko04910)	[G]	Carbohydrate transport and metabolism	Glycosyl hydrolases family 15	Phosphorylase b kinase regulatory subunit alpha, liver isoform GN=phka2 OS=Takifugu rubripes (Japanese pufferfish) PE=3 SV=1	G	Carbohydrate transport and metabolism	phosphorylase b kinase regulatory subunit beta [Gallus gallus]
gene14527	2067	2573	2465	2580	1703	3052	5183	4576	3122	3137	18.791	21.0645	17.8552	18.168	14.9997	27.3096	35.0008	37.8318	29.4926	25.4117	1.62617e-05	1.25365	up	--	--	--	K17257|0|gga:415742|K17257 integrin alpha FG-GAP repeat containing protein 1 | (RefSeq) ITFG1; integrin alpha FG-GAP repeat containing 1	--	[S]	Function unknown	Repeat domain in Vibrio, Colwellia, Bradyrhizobium and Shewanella;; FG-GAP repeat	--	S	Function unknown	T-cell immunomodulatory protein precursor [Gallus gallus]
gene14592	58941	53340	60075	52472	49031	146635	200331	172583	134916	138771	593.155	489.266	544.147	417.489	482.096	1739.74	1745.5	1727.93	1600.79	1384.52	9.38902e-10	2.03815	up	[G]	Carbohydrate transport and metabolism	Molecular Function: glucose-6-phosphate isomerase activity (GO:0004347);; Cellular Component: nucleus (GO:0005634);; Cellular Component: cytoplasm (GO:0005737);; Cellular Component: plasma membrane (GO:0005886);; Biological Process: gluconeogenesis (GO:0006094);; Biological Process: glycolytic process (GO:0006096);;	K01810|0|gga:415783|K01810 glucose-6-phosphate isomerase [EC:5.3.1.9] | (RefSeq) GPI; glucose-6-phosphate isomerase	Glycolysis / Gluconeogenesis (ko00010);; Pentose phosphate pathway (ko00030);; Starch and sucrose metabolism (ko00500);; Amino sugar and nucleotide sugar metabolism (ko00520);; Carbon metabolism (ko01200)	[G]	Carbohydrate transport and metabolism	Phosphoglucose isomerase	--	G	Carbohydrate transport and metabolism	glucose-6-phosphate isomerase [Gallus gallus]
gene14627	32	23	66	32	42	117	107	154	73	130	0.140825	0.08354	0.255606	0.10198	0.233628	0.627056	0.725429	2.16447	0.386876	0.706773	0.00170052	2.07692	up	--	--	Molecular Function: calcium ion binding (GO:0005509);; Cellular Component: plasma membrane (GO:0005886);; Biological Process: homophilic cell adhesion via plasma membrane adhesion molecules (GO:0007156);; Biological Process: response to cold (GO:0009409);; Cellular Component: integral component of membrane (GO:0016021);; Biological Process: synaptic transmission, glutamatergic (GO:0035249);; Cell…	K06800|0|phi:102104235|K06800 cadherin 8, type 2 | (RefSeq) CDH8; cadherin 8	--	[S]	Function unknown	Cadherin domain;; Cadherin cytoplasmic region;; Cadherin-like	Cadherin-11 (Precursor) GN=CDH11 OS=Gallus gallus (Chicken) PE=2 SV=1	S	Function unknown	PREDICTED: cadherin-8 [Corvus cornix cornix]
gene14632	551	395	580	508	372	84	118	103	50	170	2.01161	1.23512	1.90807	1.455	1.24008	0.33534	0.343625	0.346597	0.20022	0.575462	0.00106782	-1.73853	down	--	--	Molecular Function: metalloendopeptidase activity (GO:0004222);; Cellular Component: proteinaceous extracellular matrix (GO:0005578);; Biological Process: proteolysis (GO:0006508);; Molecular Function: zinc ion binding (GO:0008270);;	K08632|0|gga:100858277|K08632 a disintegrin and metalloproteinase with thrombospondin motifs 18 [EC:3.4.24.-] | (RefSeq) ADAMTS18; ADAM metallopeptidase with thrombospondin type 1 motif 18	--	[O]	Posttranslational modification, protein turnover, chaperones	ADAM-TS Spacer 1;; Reprolysin (M12B) family zinc metalloprotease;; Thrombospondin type 1 domain;; Reprolysin family propeptide;; Metallo-peptidase family M12;; PLAC (protease and lacunin) domain;; Metallo-peptidase family M12B Reprolysin-like;; Metallo-peptidase family M12B Reprolysin-like;; Metallo-peptidase family M12B Reprolysin-like	Coagulation factor X-activating enzyme heavy chain alternate form (Precursor) OS=Macrovipera lebetina (Levantine viper) PE=1 SV=1	O	Posttranslational modification, protein turnover, chaperones	PREDICTED: A disintegrin and metalloproteinase with thrombospondin motifs 18 isoform X1 [Gallus gallus]
gene14638	347	578	826	792	695	147	203	181	147	218	2.33927	3.60554	4.47019	3.88923	4.23404	1.11364	1.16667	1.15997	1.12094	1.49055	0.00425125	-1.34484	down	--	--	Molecular Function: transcription factor activity, sequence-specific DNA binding (GO:0003700);; Molecular Function: protein binding (GO:0005515);; Cellular Component: nucleus (GO:0005634);; Biological Process: transcription, DNA-templated (GO:0006351);; Molecular Function: sequence-specific DNA binding (GO:0043565);;	K09035|5.38029e-79|phi:102105380|K09035 transcription factor Maf | (RefSeq) MAF; MAF bZIP transcription factor	--	[K]	Transcription	bZIP Maf transcription factor;; Maf N-terminal region	Transcription factor Maf GN=MAF OS=Gallus gallus (Chicken) PE=1 SV=1	K	Transcription	PREDICTED: transcription factor Maf isoform X1 [Pseudopodoces humilis]
gene14675	1987	1691	1734	2477	2560	713	614	311	367	538	7.72605	5.99337	6.06778	7.61633	9.74852	3.26748	2.07138	1.20075	1.68268	2.0964	2.31928e-07	-1.52942	down	[S]	Function unknown	Cellular Component: extracellular region (GO:0005576);; Molecular Function: heparin binding (GO:0008201);; Cellular Component: transport vesicle (GO:0030133);; Biological Process: extracellular matrix organization (GO:0030198);; Cellular Component: extracellular matrix (GO:0031012);;	K19919|0|gga:415818|K19919 cysteine-rich secretory protein | (RefSeq) CRISPLD2; cysteine rich secretory protein LCCL domain containing 2	--	[S]	Function unknown	LCCL domain;; Cysteine-rich secretory protein family	Cysteine-rich secretory protein LCCL domain-containing 2 (Precursor) GN=crispld2 OS=Xenopus tropicalis (Western clawed frog) PE=2 SV=1	S	Function unknown	PREDICTED: cysteine-rich secretory protein LCCL domain-containing 2 [Gallus gallus]
gene14694	6710	5226	6972	7122	7108	11347	12458	8761	8625	9164	24.6584	16.6327	22.0749	19.6714	24.7693	48.0104	37.6666	31.3966	37.0902	33.0802	0.00113	1.11587	up	--	--	Cellular Component: SCF ubiquitin ligase complex (GO:0019005);; Molecular Function: cyclin binding (GO:0030332);; Biological Process: SCF-dependent proteasomal ubiquitin-dependent protein catabolic process (GO:0031146);; Biological Process: mitotic G1 DNA damage checkpoint (GO:0031571);;	K10308|0|gga:100857445|K10308 F-box protein 31 | (RefSeq) FBXO31; F-box protein 31	--	--	--	--	F-box only protein 31 GN=fbxo31 OS=Xenopus tropicalis (Western clawed frog) PE=2 SV=1	R	General function prediction only	PREDICTED: F-box only protein 31-like isoform X2 [Gallus gallus]
gene14696	10536	14089	13069	13066	11775	16461	22204	18126	15083	20277	104.681	127.597	116.878	102.643	114.307	192.818	191.012	179.177	176.691	199.735	0.00308719	1.05953	up	--	--	Cellular Component: cytosol (GO:0005829);;	K10435|3.57016e-86|gga:427559|K10435 microtubule-associated protein 1 light chain | (RefSeq) MAP1LC3B; microtubule associated protein 1 light chain 3 beta	--	[Z]	Cytoskeleton	Autophagy protein Atg8 ubiquitin like;; Ubiquitin-like autophagy protein Apg12	--	Z	Cytoskeleton	microtubule-associated proteins 1A/1B light chain 3B [Gallus gallus]
gene14698	729	464	645	537	833	1497	1680	1313	1637	1483	7.4821	4.34143	5.95423	4.35931	8.35118	18.1217	14.9335	13.4139	19.8156	15.1005	2.55342e-09	1.74853	up	[S]	Function unknown	Cellular Component: endoplasmic reticulum membrane (GO:0005789);; Cellular Component: plasma membrane (GO:0005886);; Biological Process: learning (GO:0007612);; Biological Process: memory (GO:0007613);; Molecular Function: calcium-release channel activity (GO:0015278);; Cellular Component: junctional membrane complex (GO:0030314);; Biological Process: exploration behavior (GO:0035640);; Biologica…	K19530|0|clv:102098053|K19530 junctophilin | (RefSeq) JPH3; junctophilin 3	--	[R]	General function prediction only	MORN repeat	Radial spoke head 10 homolog B GN=rsph10b OS=Danio rerio (Zebrafish) PE=2 SV=1	R	General function prediction only	PREDICTED: junctophilin-3 isoform X1 [Pygoscelis adeliae]
gene14699	1401	1783	1387	1432	1583	3866	3691	2915	3632	4532	10.0442	11.6586	8.94963	8.12949	11.0893	32.6783	22.9116	20.79	30.7023	32.2139	4.43875e-11	1.80326	up	--	--	Cellular Component: endoplasmic reticulum membrane (GO:0005789);; Cellular Component: plasma membrane (GO:0005886);; Biological Process: learning (GO:0007612);; Biological Process: memory (GO:0007613);; Molecular Function: calcium-release channel activity (GO:0015278);; Cellular Component: junctional membrane complex (GO:0030314);; Biological Process: exploration behavior (GO:0035640);; Biologica…	--	--	[R]	General function prediction only	--	--	R	General function prediction only	PREDICTED: junctophilin-3 isoform X2 [Gallus gallus]
gene14701	4988	2640	4564	2808	3470	16252	19238	16154	8160	8241	23.1351	7.65377	18.9761	7.63195	15.2988	91.6896	77.2205	77.3128	30.7059	22.8264	2.82843e-06	2.37636	up	[E]	Amino acid transport and metabolism	Biological Process: amino acid transmembrane transport (GO:0003333);; Molecular Function: L-amino acid transmembrane transporter activity (GO:0015179);; Biological Process: L-amino acid transport (GO:0015807);; Cellular Component: integral component of membrane (GO:0016021);;	K13780|0|gga:415832|K13780 solute carrier family 7 (L-type amino acid transporter), member 5 | (RefSeq) SLC7A5; solute carrier family 7 member 5	mTOR signaling pathway (ko04150)	[E]	Amino acid transport and metabolism	Amino acid permease;; Amino acid permease	Y+L amino acid transporter 2 OS=Danio rerio (Zebrafish) PE=2 SV=1	E	Amino acid transport and metabolism	large neutral amino acids transporter small subunit 1 [Gallus gallus]
gene14706	602	473	580	469	436	143	207	186	90	227	0.873653	0.583032	0.706903	0.50583	0.578012	0.227032	0.244504	0.249854	0.142393	0.304225	0.047463	-1.12254	down	--	--	--	--	--	[R]	General function prediction only	C2H2-type zinc finger	B-cell lymphoma 6 protein homolog OS=Gallus gallus (Chicken) PE=2 SV=1	R	General function prediction only	PREDICTED: zinc finger protein 469 isoform X1 [Gallus gallus]
gene1471	37	84	40	65	23	128	198	86	53	100	0.226545	0.418783	0.215822	0.256737	0.111644	0.763637	0.984968	0.440831	0.324201	0.504564	0.0147021	1.68432	up	--	--	--	--	--	--	--	--	--	S	Function unknown	PREDICTED: uncharacterized protein C1orf114 [Gallus gallus]
gene1477	3712	3193	3135	5668	3253	1014	792	1098	763	3192	17.6109	13.8068	13.3854	21.2616	15.0787	5.67184	3.25247	5.182	4.26864	15.015	0.0445509	-1.00772	down	--	--	--	--	--	--	--	Dermatopontin	--	R	General function prediction only	PREDICTED: dermatopontin [Meleagris gallopavo]
gene14852	4529	1259	173	827	35662	174737	283950	266169	226420	316447	142.837	36.1804	4.89116	20.6248	1099.09	6498.21	7754.94	8353.13	8420.76	9896.13	2.47513e-53	5.27717	up	[TZDR]	Signal transduction mechanisms;; Cytoskeleton;; Cell cycle control, cell division, chromosome partitioning;; General function prediction only	Molecular Function: calcium ion binding (GO:0005509);; Cellular Component: cytosol (GO:0005829);; Cellular Component: troponin complex (GO:0005861);; Biological Process: response to stress (GO:0006950);; Molecular Function: troponin I binding (GO:0031013);; Molecular Function: troponin T binding (GO:0031014);; Biological Process: regulation of muscle filament sliding speed (GO:0032972);; Molecula…	K05865|5.26445e-101|tgu:100222022|K05865 troponin C, slow skeletal and cardiac muscles | (RefSeq) TNNC1; troponin C1, slow skeletal and cardiac type	Calcium signaling pathway (ko04020);; Cardiac muscle contraction (ko04260);; Adrenergic signaling in cardiomyocytes (ko04261)	[T]	Signal transduction mechanisms	EF-hand domain pair;; EF-hand domain pair;; EF hand;; EF-hand domain;; EF hand;; EF-hand domain;; Cytoskeletal-regulatory complex EF hand;; Secreted protein acidic and rich in cysteine Ca binding region	Troponin C, slow skeletal and cardiac muscles GN=TNNC1 OS=Gallus gallus (Chicken) PE=1 SV=1	T	Signal transduction mechanisms	troponin C, slow skeletal and cardiac muscles [Gallus gallus]
gene14853	2921	3216	3011	2803	2791	4125	5004	4603	4407	3333	12.7405	12.9019	11.7597	10.1778	11.2945	21.002	18.4101	19.0125	21.7875	14.4372	0.000781757	1.06383	up	[S]	Function unknown	--	--	--	[TZ]	Signal transduction mechanisms;; Cytoskeleton	Leucine Rich repeats (2 copies);; PX domain;; Leucine rich repeat;; Leucine Rich Repeat;; Leucine Rich repeat;; Leucine rich repeat	Serine/threonine-protein kinase 11-interacting protein GN=stk11ip OS=Xenopus tropicalis (Western clawed frog) PE=2 SV=1	TZ	Signal transduction mechanisms;; Cytoskeleton	PREDICTED: nischarin [Meleagris gallopavo]
gene14901	1891	2020	2414	3426	3037	424	884	506	504	639	10.8973	9.45874	11.7175	13.5069	16.1909	3.07443	3.54092	2.55944	2.54118	3.94177	1.6587e-08	-1.6212	down	[RTKL]	General function prediction only;; Signal transduction mechanisms;; Transcription;; Replication, recombination and repair	--	K04444|0|gga:415917|K04444 mitogen-activated protein kinase-activated protein kinase 3 [EC:2.7.11.1] | (RefSeq) MAPKAPK3; mitogen-activated protein kinase-activated protein kinase 3	MAPK signaling pathway (ko04010);; VEGF signaling pathway (ko04370)	[T]	Signal transduction mechanisms	Protein kinase domain;; Protein tyrosine kinase;; Lipopolysaccharide kinase (Kdo/WaaP) family	Ribosomal protein S6 kinase alpha-5 GN=RPS6KA5 OS=Gallus gallus (Chicken) PE=2 SV=1	T	Signal transduction mechanisms	PREDICTED: MAP kinase-activated protein kinase 3 isoform X3 [Gallus gallus]
gene14912	2691	2212	3602	3203	3317	4056	5644	4774	3380	4073	12.7781	9.57384	15.3938	12.0213	15.3868	22.7057	23.2003	22.5506	18.9198	19.1689	0.000691612	1.0464	up	--	--	Molecular Function: zinc ion binding (GO:0008270);;	K12169|0|gga:415923|K12169 Kip1 ubiquitination-promoting complex protein 1 [EC:2.3.2.27] | (RefSeq) RNF123; ring finger protein 123	--	[O]	Posttranslational modification, protein turnover, chaperones	SPRY domain;; Zinc finger, C3HC4 type (RING finger)	ATP-dependent RNA helicase DDX1 GN=ddx1 OS=Xenopus tropicalis (Western clawed frog) PE=2 SV=1	O	Posttranslational modification, protein turnover, chaperones	E3 ubiquitin-protein ligase RNF123 [Gallus gallus]
gene14968	453	352	393	1058	743	123	134	136	138	101	4.68431	3.08457	3.8724	9.08357	7.98783	1.47591	1.10514	1.32502	1.93447	0.956698	0.00456808	-1.69716	down	--	--	--	K13162|0|phi:102099813|K13162 poly(rC)-binding protein 2/3/4 | (RefSeq) PCBP4; poly(rC) binding protein 4	--	[AR]	RNA processing and modification;; General function prediction only	KH domain;; KH domain;; KH domain	Heterogeneous nuclear ribonucleoprotein K GN=HNRNPK OS=Gallus gallus (Chicken) PE=2 SV=1	A	RNA processing and modification	PREDICTED: poly(rC)-binding protein 4 isoform X1 [Meleagris gallopavo]
gene14973	942	809	896	1098	1508	172	339	115	178	216	6.13725	4.7462	5.16626	5.47457	10.8553	1.272	2.16277	0.712448	1.30912	1.53835	8.50464e-06	-1.89302	down	--	--	Biological Process: neural crest cell migration (GO:0001755);; Molecular Function: receptor activity (GO:0004872);; Cellular Component: membrane (GO:0016020);; Molecular Function: chemorepellent activity (GO:0045499);; Biological Process: negative regulation of axon extension involved in axon guidance (GO:0048843);; Biological Process: negative chemotaxis (GO:0050919);;	K06840|0|mgp:100550709|K06840 semaphorin 3 | (RefSeq) SEMA3F; semaphorin 3F	--	[T]	Signal transduction mechanisms	Sema domain;; Immunoglobulin V-set domain;; Immunoglobulin domain;; Immunoglobulin I-set domain	Semaphorin-3C (Precursor) GN=SEMA3C OS=Gallus gallus (Chicken) PE=2 SV=1	T	Signal transduction mechanisms	PREDICTED: semaphorin-3F isoform X2 [Meleagris gallopavo]
gene14976	2367	1945	3159	2914	4121	724	1015	877	645	572	20.723	15.0268	24.7058	19.4015	34.1283	7.62185	7.88263	7.55359	6.69584	4.8685	0.000569634	-1.41758	down	--	--	--	K13576|0|gga:429200|K13576 solute carrier family 38 (sodium-coupled neutral amino acid transporter), member 3 | (RefSeq) SLC38A3; solute carrier family 38 member 3	--	[E]	Amino acid transport and metabolism	Transmembrane amino acid transporter protein	Sodium-coupled neutral amino acid transporter 2 GN=SLC38A2 OS=Gallus gallus (Chicken) PE=2 SV=2	E	Amino acid transport and metabolism	PREDICTED: sodium-coupled neutral amino acid transporter 3 [Meleagris gallopavo]
gene14977	526	366	635	876	685	86	88	106	117	185	4.37488	2.544	4.32155	5.47112	5.31906	0.64166	0.51078	0.666747	1.0048	1.23682	3.70964e-05	-1.90111	down	--	--	--	K06840|0|fpg:101910325|K06840 semaphorin 3 | (RefSeq) SEMA3B; semaphorin 3B	--	[T]	Signal transduction mechanisms	Sema domain	Semaphorin-3aa (Precursor) GN=sema3aa OS=Danio rerio (Zebrafish) PE=2 SV=1	T	Signal transduction mechanisms	PREDICTED: semaphorin-3B [Meleagris gallopavo]
gene14979	533	509	682	1142	609	3	3	3	25	13	9.61008	8.17554	11.0494	16.3494	11.041	0.059299	0.030822	0.035417	0.588336	0.210415	4.89821e-29	-5.59497	down	--	--	--	--	--	--	--	--	--	--	--	PREDICTED: uncharacterized protein C3orf45-like [Gallus gallus]
gene14993	17115	18300	12562	11948	7578	2653	1828	5528	2013	3599	127.781	103.273	73.9873	81.5113	48.941	29.2959	13.2277	35.6822	16.6815	27.9903	0.000987398	-1.61246	down	--	--	Cellular Component: proteinaceous extracellular matrix (GO:0005578);; Cellular Component: extracellular space (GO:0005615);; Molecular Function: growth factor activity (GO:0008083);;	K08126|0|gga:374039|K08126 osteoglycin (osteoinductive factor, mimecan) | (RefSeq) OGN, null; osteoglycin	--	[R]	General function prediction only	Leucine rich repeat;; Leucine Rich repeats (2 copies);; Leucine Rich Repeat;; Leucine rich repeats (6 copies);; Leucine rich repeat	Mimecan (Precursor) GN=OGN OS=Gallus gallus (Chicken) PE=2 SV=1	R	General function prediction only	mimecan precursor [Gallus gallus]
gene15128	26	37	31	32	30	49	95	51	85	152	0.208636	0.274911	0.226448	0.204095	0.252084	0.705379	1.15172	0.794304	0.96157	2.28185	0.00425591	1.93909	up	--	--	--	--	--	--	--	Domain of unknown function (DUF4200)	--	S	Function unknown	PREDICTED: coiled-coil domain-containing protein 37 [Gallus gallus]
gene15139	302	187	244	302	159	43	28	5	34	52	2.23106	1.77874	1.66751	1.79127	1.19084	0.221462	0.129632	0.021429	0.184571	0.232716	0.000100984	-2.35817	down	--	--	--	--	--	--	--	--	--	--	--	--
gene15140	6153	3905	5388	5768	6507	1316	484	1475	1041	331	12.3713	7.23557	10.0121	8.42013	13.3096	3.20041	1.55229	2.94509	2.42097	2.22703	8.53477e-10	-2.00159	down	[R]	General function prediction only	--	K05039|0|clv:102089754|K05039 solute carrier family 6 (neurotransmitter transporter, GABA) member 6/8/11/12/13 | (RefSeq) SLC6A6; solute carrier family 6 member 6	--	[T]	Signal transduction mechanisms	Sodium:neurotransmitter symporter family	Creatine transporter OS=Torpedo marmorata (Marbled electric ray) PE=2 SV=1	P	Inorganic ion transport and metabolism	PREDICTED: sodium- and chloride-dependent taurine transporter isoform X1 [Haliaeetus leucocephalus]
gene15149	1	41	33	16	26	48	117	53	43	73	0.013494	0.517495	0.416273	0.17669	0.352303	0.78798	1.41528	0.740402	0.704901	1.00675	0.00383181	1.98737	up	[RTKL]	General function prediction only;; Signal transduction mechanisms;; Transcription;; Replication, recombination and repair	--	K08832|1.10666e-132|apla:101797129|K08832 serine/threonine-protein kinase SRPK3 [EC:2.7.11.1] | (RefSeq) SRSF protein kinase 3	--	[T]	Signal transduction mechanisms	Protein kinase domain;; Protein tyrosine kinase	Dual specificity tyrosine-phosphorylation-regulated kinase 2 OS=Gallus gallus (Chicken) PE=2 SV=1	T	Signal transduction mechanisms	PREDICTED: SRSF protein kinase 3-like isoform X2 [Meleagris gallopavo]
gene15166	156	235	282	303	132	28	48	34	41	13	0.4719	0.653443	0.77741	0.730465	0.770585	0.194512	0.137152	0.098651	0.144487	0.037222	0.000330634	-2.18735	down	--	--	--	--	--	--	--	--	--	S	Function unknown	PREDICTED: coiled-coil domain-containing protein 36 isoform X1 [Gallus gallus]
gene15184	3788	3305	4131	3907	4142	8438	11997	10119	7072	7219	18.802	15.5432	18.6853	15.3875	20.7452	42.4974	50.9497	52.4409	36.323	34.3912	1.12581e-08	1.7195	up	--	--	Molecular Function: ubiquitin-protein transferase activity (GO:0004842);; Cellular Component: nucleus (GO:0005634);; Cellular Component: cytoplasm (GO:0005737);; Molecular Function: zinc ion binding (GO:0008270);; Biological Process: protein ubiquitination involved in ubiquitin-dependent protein catabolic process (GO:0042787);; Biological Process: developmental cell growth (GO:0048588);; Biologic…	K11969|0|fab:101818723|K11969 ariadne-2 [EC:2.3.2.27] | (RefSeq) ARIH2; ariadne RBR E3 ubiquitin protein ligase 2	--	[O]	Posttranslational modification, protein turnover, chaperones	IBR domain	E3 ubiquitin-protein ligase arih1 GN=arih1 OS=Danio rerio (Zebrafish) PE=2 SV=1	O	Posttranslational modification, protein turnover, chaperones	PREDICTED: E3 ubiquitin-protein ligase ARIH2 isoform X1 [Ficedula albicollis]
gene15296	1505	1864	1333	1486	1037	463	427	503	251	784	5.18845	5.83091	4.22168	4.14778	3.51899	1.93912	2.20132	1.77782	1.01731	2.67577	0.00235088	-1.09959	down	--	--	--	K07526|0|amj:102569393|K07526 SLIT-ROBO Rho GTPase activating protein | (RefSeq) SRGAP3; SLIT-ROBO Rho GTPase activating protein 3	--	[Z]	Cytoskeleton	RhoGAP domain;; Fes/CIP4, and EFC/F-BAR homology domain;; SH3 domain;; Variant SH3 domain;; Variant SH3 domain	SLIT-ROBO Rho GTPase-activating protein 2 GN=srgap2 OS=Danio rerio (Zebrafish) PE=2 SV=1	T	Signal transduction mechanisms	PREDICTED: SLIT-ROBO Rho GTPase-activating protein 3-like [Alligator mississippiensis]
gene153	5104	3356	6631	7389	10775	726	879	677	564	1371	13.1375	7.42678	14.5841	15.0891	25.5067	2.0525	1.81164	1.61668	1.59256	3.26832	0.000254292	-2.51864	down	[RTKL]	General function prediction only;; Signal transduction mechanisms;; Transcription;; Replication, recombination and repair	Molecular Function: protein serine/threonine kinase activity (GO:0004674);; Molecular Function: ATP binding (GO:0005524);; Cellular Component: nucleus (GO:0005634);; Cellular Component: cytoplasm (GO:0005737);; Biological Process: protein phosphorylation (GO:0006468);; Biological Process: positive regulation of neuron projection development (GO:0010976);; Biological Process: positive regulation o…	K08794|0|gga:425522|K08794 calcium/calmodulin-dependent protein kinase I [EC:2.7.11.17] | (RefSeq) CAMK1D; calcium/calmodulin dependent protein kinase ID	--	[T]	Signal transduction mechanisms	Protein kinase domain;; Protein tyrosine kinase;; Kinase-like	CaM kinase-like vesicle-associated protein GN=camkv OS=Xenopus laevis (African clawed frog) PE=2 SV=1	T	Signal transduction mechanisms	PREDICTED: calcium/calmodulin-dependent protein kinase type 1D [Gallus gallus]
gene15302	18523	12951	17983	18063	18715	26847	33479	25954	18900	21381	74.9287	47.1604	66.1125	57.0574	72.857	127.664	117.166	105	89.0474	86.9573	0.00406345	1.05429	up	--	--	--	K17263|0|mgp:100545074|K17263 cullin-associated NEDD8-dissociated protein 1 | (RefSeq) cullin-associated NEDD8-dissociated protein 1-like	--	[R]	General function prediction only	TATA-binding protein interacting (TIP20);; HEAT repeats;; HEAT-like repeat;; HEAT repeat;; UME (NUC010) domain;; Adaptin N terminal region;; non-SMC mitotic condensation complex subunit 1;; CLASP N terminal;; Vacuolar 14 Fab1-binding region;; Domain of unknown function (DUF1981);; Armadillo/beta-catenin-like repeat	--	R	General function prediction only	PREDICTED: cullin-associated NEDD8-dissociated protein 1 isoformX2 [Gallus gallus]
gene15340	700	1164	1006	1260	1241	1336	1249	1052	1886	2869	8.61372	15.0897	13.4528	13.706	11.3752	21.6336	15.7279	14.9195	31.6776	37.0741	0.023187	1.14822	up	[E]	Amino acid transport and metabolism	Molecular Function: aminoacylase activity (GO:0004046);; Cellular Component: cytoplasm (GO:0005737);; Biological Process: proteolysis (GO:0006508);; Biological Process: cellular amino acid metabolic process (GO:0006520);; Molecular Function: metallopeptidase activity (GO:0008237);;	K14677|0|gga:100858836|K14677 aminoacylase [EC:3.5.1.14] | (RefSeq) ACY1; aminoacylase 1	Arginine biosynthesis (ko00220);; 2-Oxocarboxylic acid metabolism (ko01210);; Biosynthesis of amino acids (ko01230)	[E]	Amino acid transport and metabolism	Peptidase family M20/M25/M40;; Peptidase dimerisation domain	Probable carboxypeptidase PM20D1.2 (Precursor) GN=pm20d1.2 OS=Danio rerio (Zebrafish) PE=2 SV=1	E	Amino acid transport and metabolism	PREDICTED: aminoacylase-1 isoformX1 [Gallus gallus]
gene154	872	1296	1314	1349	1405	100	101	156	346	243	6.27248	8.48751	8.55071	7.68196	9.96038	0.766059	0.567471	1.12579	2.95504	1.76198	1.99278e-10	-2.16759	down	--	--	--	--	--	--	--	--	--	S	Function unknown	PREDICTED: coiled-coil domain-containing protein 3 [Gallus gallus]
gene15457	2873	1308	3118	3848	3273	7658	11695	6978	6709	7448	12.5825	5.21907	12.2869	13.3211	14.0021	39.5379	44.3443	30.4026	34.6425	32.3357	8.52655e-12	1.99401	up	--	--	--	--	--	--	--	Domain of unknown function (DUF4585)	--	S	Function unknown	PREDICTED: proline-rich basic protein 1 [Meleagris gallopavo]
gene15468	4059	4594	4469	5529	4081	8709	12977	10612	7862	8329	23.4094	24.2619	23.3255	24.6957	23.1253	59.457	65.1784	61.1538	53.7171	47.7821	2.15631e-07	1.6036	up	[J]	Translation, ribosomal structure and biogenesis	Biological Process: nuclear-transcribed mRNA catabolic process, nonsense-mediated decay (GO:0000184);; Cellular Component: cytoplasm (GO:0005737);; Biological Process: translational termination (GO:0006415);; Biological Process: protein methylation (GO:0006479);; Molecular Function: translation release factor activity, codon specific (GO:0016149);;	K03265|0|acs:100566787|K03265 peptide chain release factor subunit 1 | (RefSeq) etf1; eukaryotic translation termination factor 1	mRNA surveillance pathway (ko03015)	[J]	Translation, ribosomal structure and biogenesis	eRF1 domain 2;; eRF1 domain 3;; eRF1 domain 1	Eukaryotic peptide chain release factor subunit 1 GN=etf1 OS=Xenopus tropicalis (Western clawed frog) PE=2 SV=1	J	Translation, ribosomal structure and biogenesis	PREDICTED: eukaryotic peptide chain release factor subunit 1 [Anolis carolinensis]
gene15491	584	754	356	679	345	80	130	100	88	244	1.47436	1.75983	1.09655	1.35543	0.850375	0.237068	0.284122	0.250953	0.260684	0.609794	0.00154917	-1.62446	down	[S]	Function unknown	Molecular Function: calcium ion binding (GO:0005509);; Cellular Component: extracellular space (GO:0005615);; Biological Process: negative regulation of cell proliferation (GO:0008285);; Biological Process: animal organ morphogenesis (GO:0009887);; Biological Process: negative regulation of gene expression (GO:0010629);; Biological Process: negative regulation of cell growth (GO:0030308);; Biolog…	K06850|0|gga:374173|K06850 slit 3 | (RefSeq) SLIT3; slit guidance ligand 3	--	[WT]	Extracellular structures;; Signal transduction mechanisms	Leucine rich repeat;; Leucine Rich repeats (2 copies);; EGF-like domain;; Leucine Rich Repeat;; Laminin G domain;; Leucine rich repeat N-terminal domain;; Laminin G domain;; Human growth factor-like EGF;; Leucine-rich repeat;; Leucine Rich repeat;; Leucine rich repeat	Delta-like protein C (Precursor) GN=dlc OS=Danio rerio (Zebrafish) PE=2 SV=1	T	Signal transduction mechanisms	slit homolog 3 protein precursor [Gallus gallus]
gene15528	172	321	225	170	193	41	49	51	58	59	0.908378	2.17558	1.08677	0.83854	1.06067	0.244965	0.250208	0.180864	0.424498	0.394516	0.0189529	-1.5546	down	--	--	Biological Process: blood vessel remodeling (GO:0001974);; Biological Process: response to amphetamine (GO:0001975);; Biological Process: vasoconstriction of artery involved in baroreceptor response to lowering of systemic arterial blood pressure (GO:0001987);; Biological Process: positive regulation of heart rate by epinephrine-norepinephrine (GO:0001996);; Biological Process: positive regulatio…	K04136|0|mgp:100543635|K04136 adrenergic receptor alpha-1B | (RefSeq) ADRA1B; adrenoceptor alpha 1B	Calcium signaling pathway (ko04020);; Neuroactive ligand-receptor interaction (ko04080);; Adrenergic signaling in cardiomyocytes (ko04261);; Vascular smooth muscle contraction (ko04270)	[R]	General function prediction only	7 transmembrane receptor (rhodopsin family);; Serpentine type 7TM GPCR chemoreceptor Srsx	Alpha-1A adrenergic receptor GN=adra1a OS=Oryzias latipes (Medaka fish) PE=3 SV=1	T	Signal transduction mechanisms	PREDICTED: alpha-1B adrenergic receptor isoform X3 [Gallus gallus]
gene15599	808	956	743	1482	619	270	237	275	224	501	8.78596	9.33209	7.11047	12.3861	6.37348	3.4793	2.10613	2.75387	2.71402	5.33322	0.00894435	-1.10402	down	--	--	Molecular Function: actin binding (GO:0003779);; Cellular Component: cytoplasm (GO:0005737);; Biological Process: nervous system development (GO:0007399);; Biological Process: cell differentiation (GO:0030154);;	--	--	[Z]	Cytoskeleton	Cofilin/tropomyosin-type actin-binding protein	Drebrin GN=DBN1 OS=Gallus gallus (Chicken) PE=2 SV=4	Z	Cytoskeleton	drebrin [Gallus gallus]
gene15627	1299	1201	1307	1480	1394	1833	2604	2176	1845	2110	11.0373	9.19364	10.0804	9.8945	11.5073	18.6257	19.1016	18.4423	18.5874	17.8912	6.53397e-05	1.16253	up	--	--	--	--	--	--	--	--	--	S	Function unknown	PREDICTED: SUMO-interacting motif-containing protein 1 isoform X2 [Gallus gallus]
gene15663	133	66	262	223	255	31	57	53	27	46	0.834037	0.547225	1.68569	1.16124	1.62226	0.284935	0.314631	0.383227	0.191942	0.315791	0.01717	-1.6504	down	[I]	Lipid transport and metabolism	Molecular Function: iron ion binding (GO:0005506);; Biological Process: fatty acid biosynthetic process (GO:0006633);; Cellular Component: integral component of membrane (GO:0016021);; Molecular Function: oxidoreductase activity (GO:0016491);; Biological Process: oxidation-reduction process (GO:0055114);;	K07750|0|gga:416256|K07750 methylsterol monooxygenase [EC:1.14.13.72] | (RefSeq) FAXDC2, C13H5ORF4, C5orf4; fatty acid hydroxylase domain containing 2	Steroid biosynthesis (ko00100)	[I]	Lipid transport and metabolism	Fatty acid hydroxylase superfamily	Methylsterol monooxygenase 1 GN=MSMO1 OS=Gallus gallus (Chicken) PE=2 SV=1	I	Lipid transport and metabolism	chromosome 13 open reading frame, human C5orf4 [Gallus gallus]
gene15682	8763	8418	9635	9962	9073	17824	19828	18059	15795	14832	69.7939	60.4325	69.4625	62.1705	69.3298	168.887	137.043	145.594	151.79	117.634	1.95452e-05	1.43339	up	--	--	Molecular Function: nucleotide binding (GO:0000166);; Molecular Function: mRNA binding (GO:0003729);; Biological Process: transport (GO:0006810);; Cellular Component: cytoplasmic stress granule (GO:0010494);; Biological Process: negative regulation of canonical Wnt signaling pathway (GO:0090090);;	K17265|0|gga:416265|K17265 Ras GTPase-activating protein-binding protein 1 [EC:3.6.4.12 3.6.4.13] | (RefSeq) G3BP1; G3BP stress granule assembly factor 1	--	[T]	Signal transduction mechanisms	Nuclear transport factor 2 (NTF2) domain;; RNA recognition motif. (a.k.a. RRM, RBD, or RNP domain);; RNA recognition motif (a.k.a. RRM, RBD, or RNP domain)	Heterogeneous nuclear ribonucleoprotein A2 homolog 1 OS=Xenopus laevis (African clawed frog) PE=2 SV=1	T	Signal transduction mechanisms	PREDICTED: ras GTPase-activating protein-binding protein 1 isoform X2 [Meleagris gallopavo]
gene15697	15730	11222	21435	22817	17483	32536	47034	35762	31268	39645	120.964	81.2705	144.712	130.003	119.664	300.153	59.2717	285.911	288.622	314.329	3.07495e-06	1.57911	up	--	--	--	--	--	--	--	Calcineurin-binding protein (Calsarcin)	--	R	General function prediction only	PREDICTED: myozenin-3 isoform X2 [Gallus gallus]
gene15705	2833	3698	5987	4334	5865	807	1965	718	1134	2221	24.1776	17.9102	30.779	24.9164	28.8256	5.91702	12.7728	3.74019	8.19294	10.9343	0.00506625	-1.27483	down	[RTKL]	General function prediction only;; Signal transduction mechanisms;; Transcription;; Replication, recombination and repair	Biological Process: G1/S transition of mitotic cell cycle (GO:0000082);; Molecular Function: calmodulin-dependent protein kinase activity (GO:0004683);; Molecular Function: calmodulin binding (GO:0005516);; Molecular Function: ATP binding (GO:0005524);; Biological Process: calcium ion transport (GO:0006816);; Molecular Function: glutamate receptor binding (GO:0035254);; Biological Process: protei…	K04515|0|tgu:100220435|K04515 calcium/calmodulin-dependent protein kinase (CaM kinase) II [EC:2.7.11.17] | (RefSeq) CAMK2A; calcium/calmodulin dependent protein kinase II alpha	ErbB signaling pathway (ko04012);; Calcium signaling pathway (ko04020);; Oocyte meiosis (ko04114);; Adrenergic signaling in cardiomyocytes (ko04261);; Wnt signaling pathway (ko04310);; GnRH signaling pathway (ko04912);; Melanogenesis (ko04916)	[T]	Signal transduction mechanisms	Protein kinase domain;; Calcium/calmodulin dependent protein kinase II Association;; Protein tyrosine kinase;; Domain of unknown function (DUF4440);; SnoaL-like domain	Calcium/calmodulin-dependent protein kinase type II delta chain GN=CAMK2D OS=Gallus gallus (Chicken) PE=2 SV=1	T	Signal transduction mechanisms	PREDICTED: calcium/calmodulin-dependent protein kinase type II subunit alpha isoform X2 [Melopsittacus undulatus]
gene15728	1258	1006	1469	1040	1036	584	402	427	231	302	4.99202	4.27826	5.05192	3.36607	3.75356	2.6206	1.62359	1.97447	1.26694	1.39329	0.00436057	-1.05283	down	--	--	--	K08618|0|fpg:101917429|K08618 a disintegrin and metalloproteinase with thrombospondin motifs 2 [EC:3.4.24.14] | (RefSeq) ADAMTS2; ADAM metallopeptidase with thrombospondin type 1 motif 2	--	[O]	Posttranslational modification, protein turnover, chaperones	Reprolysin family propeptide;; ADAM-TS Spacer 1;; Thrombospondin type 1 domain;; Reprolysin (M12B) family zinc metalloprotease;; Metallo-peptidase family M12;; Metallo-peptidase family M12B Reprolysin-like;; Metallo-peptidase family M12B Reprolysin-like;; Metallo-peptidase family M12B Reprolysin-like	Disintegrin-like jararhagin-C (Precursor; Fragment) OS=Bothrops jararaca (Jararaca) PE=1 SV=1	O	Posttranslational modification, protein turnover, chaperones	PREDICTED: A disintegrin and metalloproteinase with thrombospondin motifs 2 isoform X2 [Gallus gallus]
gene15747	34364	35611	29609	26154	54232	2979	3716	3069	2103	5641	420.499	398.886	325.511	252.423	649.335	42.1189	39.3595	37.1266	29.938	69.1961	1.16703e-07	-2.92257	down	--	--	--	K19875|0|gga:416299|K19875 myotilin | (RefSeq) MYOT, TTID; myotilin	--	--	--	Immunoglobulin I-set domain;; Immunoglobulin domain;; Immunoglobulin V-set domain;; Immunoglobulin domain;; Immunoglobulin domain	Myosin light chain kinase, smooth muscle, deglutamylated form GN=Mylk OS=Gallus gallus (Chicken) PE=1 SV=2	T	Signal transduction mechanisms	PREDICTED: LOW QUALITY PROTEIN: myotilin [Gallus gallus]
gene15774	353	424	304	251	145	7	7	0	0	8	3.77577	3.91298	3.54087	2.32823	1.88871	0.060177	0.087257	0	0	0.128268	1.0221e-16	-5.63305	down	--	--	Molecular Function: transcription factor activity, protein binding (GO:0000988);; Molecular Function: transcription factor activity, sequence-specific DNA binding (GO:0003700);; Cellular Component: transcription factor complex (GO:0005667);; Cellular Component: nucleolus (GO:0005730);; Cellular Component: cytoplasm (GO:0005737);; Biological Process: branchiomeric skeletal muscle development (GO:0…	K09356|6.34168e-163|tgu:100227790|K09356 paired-like homeodomain transcription factor 1 | (RefSeq) PITX1; paired like homeodomain 1	--	[K]	Transcription	Homeobox domain;; OAR domain	Pituitary homeobox 1 GN=PITX1 OS=Gallus gallus (Chicken) PE=2 SV=1	K	Transcription	paired-like homeodomain transcription factor Ptx1, partial [Gallus gallus]
gene15800	60	43	129	91	70	174	192	189	150	392	0.171743	0.113641	0.408307	0.506565	0.297288	1.66441	0.621652	0.660969	0.951425	1.12941	0.000632806	1.96729	up	[I]	Lipid transport and metabolism	Molecular Function: long-chain fatty acid-CoA ligase activity (GO:0004467);; Cellular Component: mitochondrion (GO:0005739);; Biological Process: neuroblast proliferation (GO:0007405);; Biological Process: metabolic process (GO:0008152);; Cellular Component: membrane (GO:0016020);; Molecular Function: enzyme binding (GO:0019899);;	K01897|0|gga:416324|K01897 long-chain acyl-CoA synthetase [EC:6.2.1.3] | (RefSeq) ACSL6; acyl-CoA synthetase long-chain family member 6	Fatty acid biosynthesis (ko00061);; Fatty acid degradation (ko00071);; Fatty acid metabolism (ko01212);; PPAR signaling pathway (ko03320);; Peroxisome (ko04146);; Adipocytokine signaling pathway (ko04920)	[I]	Lipid transport and metabolism	AMP-binding enzyme	Long-chain-fatty-acid--CoA ligase ACSBG2 GN=ACSBG2 OS=Gallus gallus (Chicken) PE=2 SV=2	I	Lipid transport and metabolism	PREDICTED: long-chain-fatty-acid--CoA ligase 6 isoform X5 [Gallus gallus]
gene15853	2770	4078	3350	6013	2398	513	617	772	631	2103	24.0031	31.9165	25.5542	40.0374	21.1093	5.07472	5.30151	6.67564	6.16673	17.6686	0.00099083	-1.53061	down	[F]	Nucleotide transport and metabolism	Cellular Component: cytoplasm (GO:0005737);; Biological Process: pyrimidine nucleobase catabolic process (GO:0006208);; Biological Process: nervous system development (GO:0007399);; Molecular Function: hydrolase activity, acting on carbon-nitrogen (but not peptide) bonds, in cyclic amides (GO:0016812);; Molecular Function: phosphoprotein binding (GO:0051219);;	--	--	[F]	Nucleotide transport and metabolism	Amidohydrolase family;; Amidohydrolase;; Amidohydrolase;; Amidohydrolase family;; Amidohydrolase	Dihydropyrimidinase-related protein 3 {ECO:0000250|UniProtKB:Q62952} OS=Xenopus tropicalis (Western clawed frog) PE=2 SV=1	F	Nucleotide transport and metabolism	PREDICTED: dihydropyrimidinase-related protein 3 isoform X1 [Pseudopodoces humilis]
gene16077	2230	3416	4425	3488	2496	4839	6811	5821	3864	3530	5.59251	7.79596	10.0704	6.90491	6.22539	14.2843	14.793	14.7254	11.4057	8.76126	0.000215465	1.15727	up	--	--	Molecular Function: G-protein coupled receptor binding (GO:0001664);; Biological Process: in utero embryonic development (GO:0001701);; Molecular Function: GTPase activity (GO:0003924);; Molecular Function: signal transducer activity (GO:0004871);; Molecular Function: GTP binding (GO:0005525);; Biological Process: obsolete GTP catabolic process (GO:0006184);; Biological Process: G-protein coupled…	K04346|0|gga:769924|K04346 guanine nucleotide-binding protein subunit alpha-12 | (RefSeq) GNA12; G protein subunit alpha 12	MAPK signaling pathway (ko04010);; Vascular smooth muscle contraction (ko04270);; Regulation of actin cytoskeleton (ko04810)	[DT]	Cell cycle control, cell division, chromosome partitioning;; Signal transduction mechanisms	G-protein alpha subunit;; ADP-ribosylation factor family	Guanine nucleotide-binding protein G(q) subunit alpha GN=gnaq OS=Xenopus laevis (African clawed frog) PE=2 SV=2	T	Signal transduction mechanisms	PREDICTED: guanine nucleotide-binding protein subunit alpha-12 [Gallus gallus]
gene16120	6207	5604	5375	6987	4889	9852	10032	8447	8298	7357	34.3471	27.8667	26.8029	30.3943	26.1799	64.0346	47.8283	46.5459	54.332	39.3248	0.00105346	1.12753	up	--	--	Biological Process: in utero embryonic development (GO:0001701);; Cellular Component: cytoplasm (GO:0005737);; Cellular Component: COP9 signalosome (GO:0008180);; Biological Process: protein deneddylation (GO:0010388);;	K12177|0|tgu:100227969|K12177 COP9 signalosome complex subunit 3 | (RefSeq) COPS3; COP9 signalosome subunit 3	--	[OT]	Posttranslational modification, protein turnover, chaperones;; Signal transduction mechanisms	PCI domain	COP9 signalosome complex subunit 3 GN=COPS3 OS=Gallus gallus (Chicken) PE=2 SV=1	OT	Posttranslational modification, protein turnover, chaperones;; Signal transduction mechanisms	COP9 signalosome complex subunit 3 [Gallus gallus]
gene16123	1002	1557	437	500	552	289	136	95	75	158	12.4732	17.6819	4.8902	4.92073	6.7118	4.24491	1.46096	1.16995	1.09717	1.94162	0.0494856	-1.91552	down	[R]	General function prediction only	Molecular Function: GTPase activity (GO:0003924);; Molecular Function: GTP binding (GO:0005525);; Biological Process: small GTPase mediated signal transduction (GO:0007264);; Cellular Component: membrane (GO:0016020);;	K07843|0|gga:416507|K07843 RAS, dexamethasone-induced Ras-related protein 1 | (RefSeq) RASD1; ras related dexamethasone induced 1	--	[R]	General function prediction only	Ras family;; Miro-like protein;; ADP-ribosylation factor family;; Elongation factor Tu GTP binding domain	Ras-related protein Rap-1b (Precursor) GN=rap1b OS=Xenopus tropicalis (Western clawed frog) PE=2 SV=1	R	General function prediction only	PREDICTED: dexamethasone-induced Ras-related protein 1 [Meleagris gallopavo]
gene16135	7155	5415	7626	5997	6886	29056	43345	37324	21746	21102	25.8278	17.811	24.773	17.057	24.2777	123.626	135.499	134.08	90.2401	74.4801	7.10567e-13	2.70097	up	--	--	Biological Process: response to hypoxia (GO:0001666);; Biological Process: mRNA processing (GO:0006397);; Biological Process: mRNA export from nucleus (GO:0006406);; Biological Process: spermatogenesis (GO:0007283);; Cellular Component: nuclear speck (GO:0016607);; Molecular Function: oxidoreductase activity, acting on paired donors, with incorporation or reduction of molecular oxygen, 2-oxogluta…	K10767|0|gga:770703|K10767 mRNA N6-methyladenine demethylase [EC:1.14.11.53] | (RefSeq) ALKBH5; alkB homolog 5, RNA demethylase	--	[S]	Function unknown	2OG-Fe(II) oxygenase superfamily	RNA demethylase ALKBH5 GN=alkbh5 OS=Xenopus tropicalis (Western clawed frog) PE=2 SV=1	S	Function unknown	PREDICTED: RNA demethylase ALKBH5 isoform X1 [Gallus gallus]
gene16138	1733	1542	1634	1946	2014	2849	4540	3402	2308	2563	12.8552	10.4024	10.9183	11.411	14.5989	24.9334	29.1513	25.0974	20.1979	18.8233	2.70142e-06	1.31272	up	--	--	--	--	--	--	--	Mab-21 protein	Mitochondrial dynamics protein MID49 GN=mief2 OS=Xenopus laevis (African clawed frog) PE=2 SV=1	S	Function unknown	PREDICTED: mitochondrial dynamic protein MID49 isoform X2 [Gallus gallus]
gene16140	3846	3986	5220	4442	3863	5984	11576	6474	5792	5655	14.6298	14.2113	17.4055	12.8476	14.3596	26.8473	38.9586	24.5107	24.87	20.8001	0.000154318	1.231	up	--	--	Cellular Component: nucleus (GO:0005634);;	--	--	--	--	Vesicle coat protein involved in Golgi to plasma membrane transport	Smith-Magenis syndrome chromosomal region candidate gene 8-B protein homolog GN=smcr8b OS=Danio rerio (Zebrafish) PE=2 SV=1	R	General function prediction only	PREDICTED: smith-Magenis syndrome chromosomal region candidate gene 8 protein isoform X3 [Gallus gallus]
gene16157	785	878	290	464	177	80	21	60	84	156	5.50314	5.61991	1.83158	2.58643	1.21192	0.65523	0.122522	0.413479	0.681152	1.0839	0.0305988	-2.19536	down	--	--	Cellular Component: collagen trimer (GO:0005581);;	--	--	--	--	C1q domain;; Collagen triple helix repeat (20 copies)	Cytosolic endo-beta-N-acetylglucosaminidase GN=ENGASE OS=Gallus gallus (Chicken) PE=1 SV=1	W	Extracellular structures	PREDICTED: complement C1q tumor necrosis factor-related protein 1 isoform X3 [Gallus gallus]
gene16182	17152	17612	13325	28649	10698	23315	27963	25689	34383	36576	268.627	251.353	187.792	354.74	163.671	430.498	379.069	400.333	635.048	568.163	0.000336418	1.29703	up	[J]	Translation, ribosomal structure and biogenesis	Molecular Function: structural constituent of ribosome (GO:0003735);; Biological Process: translation (GO:0006412);; Cellular Component: cytosolic large ribosomal subunit (GO:0022625);;	K02925|0|gga:416542|K02925 large subunit ribosomal protein L3e | (RefSeq) RPL3L; ribosomal protein L3 like	Ribosome (ko03010)	[J]	Translation, ribosomal structure and biogenesis	Ribosomal protein L3	--	J	Translation, ribosomal structure and biogenesis	60S ribosomal protein L3-like [Gallus gallus]
gene16190	2128	2150	1756	2295	1814	2808	4905	3522	2464	2179	9.41813	10.1646	7.59919	9.66883	9.37385	18.1859	23.0188	18.8072	15.2133	9.80143	0.000632159	1.14688	up	--	--	Molecular Function: zinc ion binding (GO:0008270);;	--	--	[O]	Posttranslational modification, protein turnover, chaperones	--	Zinc finger protein 598 GN=znf598 OS=Danio rerio (Zebrafish) PE=1 SV=2	O	Posttranslational modification, protein turnover, chaperones	PREDICTED: zinc finger protein 598 isoform X4 [Gallus gallus]
gene16202	2116	2306	2501	1567	1917	8873	17126	11345	4611	10288	14.8008	14.7023	16.0284	8.66686	13.2395	74.3339	104.097	79.45	38.5389	71.5416	6.37324e-09	2.78456	up	[G]	Carbohydrate transport and metabolism	Biological Process: carbohydrate metabolic process (GO:0005975);; Molecular Function: phosphoglycolate phosphatase activity (GO:0008967);;	K19269|4.63982e-168|gga:416559|K19269 phosphoglycolate phosphatase [EC:3.1.3.18 3.1.3.48] | (RefSeq) PGP, AUM, G3PP; phosphoglycolate phosphatase	Glyoxylate and dicarboxylate metabolism (ko00630);; Carbon metabolism (ko01200)	[P]	Inorganic ion transport and metabolism	Haloacid dehalogenase-like hydrolase;; HAD-hyrolase-like;; haloacid dehalogenase-like hydrolase;; Haloacid dehalogenase-like hydrolase	Phosphoglycolate phosphatase GN=PGP OS=Gallus gallus (Chicken) PE=2 SV=1	P	Inorganic ion transport and metabolism	phosphoglycolate phosphatase [Gallus gallus]
gene16239	23	47	22	10	54	165	243	164	118	112	0.157483	0.359637	0.124978	0.07476	0.412205	1.32735	1.71762	1.35183	1.04108	0.836883	2.2321e-06	2.82387	up	--	--	--	K05073|0|apla:101800880|K05073 interleukin 9 receptor | (RefSeq) interleukin-9 receptor-like	Cytokine-cytokine receptor interaction (ko04060)	--	--	Fibronectin type III domain	Erythropoietin receptor (Precursor) OS=Xenopus laevis (African clawed frog) PE=2 SV=1	T	Signal transduction mechanisms	PREDICTED: interleukin-9 receptor-like [Meleagris gallopavo]
gene16249	737	611	900	661	621	1945	3266	2884	1149	1482	9.39517	7.21668	8.14596	4.56241	6.2757	27.0185	33.6469	39.1699	17.3019	21.6934	2.27716e-05	2.09186	up	--	--	Biological Process: establishment of mitotic spindle orientation (GO:0000132);; Cellular Component: kinetochore (GO:0000776);; Biological Process: neuron migration (GO:0001764);; Cellular Component: cytoplasm (GO:0005737);; Cellular Component: microtubule (GO:0005874);; Biological Process: microtubule nucleation (GO:0007020);; Biological Process: mitotic cell cycle (GO:0007067);; Biological Proce…	K16738|0|gga:416597|K16738 nuclear distribution protein NudE | (RefSeq) NDE1; nudE neurodevelopment protein 1	--	[Z]	Cytoskeleton	NUDE protein, C-terminal conserved region	Nuclear distribution protein nudE homolog 1 GN=NDE1 OS=Gallus gallus (Chicken) PE=2 SV=1	Z	Cytoskeleton	nuclear distribution protein nudE homolog 1 [Gallus gallus]
gene16265	5997	2531	7185	5026	5422	8597	10119	10290	6457	5065	8.81461	3.41204	9.4894	5.90477	7.82958	14.814	12.8575	15.0629	11.1096	7.51578	0.00437366	1.14763	up	[TDBLU]	Signal transduction mechanisms;; Cell cycle control, cell division, chromosome partitioning;; Chromatin structure and dynamics;; Replication, recombination and repair;; Intracellular trafficking, secretion, and vesicular transport	--	K08873|0|gga:416605|K08873 serine/threonine-protein kinase SMG1 [EC:2.7.11.1] | (RefSeq) SMG1, RP11-345J4.5; SMG1, nonsense mediated mRNA decay associated PI3K related kinase	mRNA surveillance pathway (ko03015)	[L]	Replication, recombination and repair	Phosphatidylinositol 3- and 4-kinase;; FATC domain	Serine/threonine-protein kinase atr GN=atr OS=Xenopus laevis (African clawed frog) PE=1 SV=2	T	Signal transduction mechanisms	PREDICTED: LOW QUALITY PROTEIN: serine/threonine-protein kinase SMG1 [Gallus gallus]
gene1629	6500	4440	5184	6600	4541	2045	1750	2346	524	3156	20.1324	12.4052	14.3554	16.0419	13.6711	7.38069	4.67279	7.14864	1.90347	9.74483	0.0038256	-1.00938	down	--	--	--	K06522|0|gga:418451|K06522 immunoglobulin superfamily, member 2/3 | (RefSeq) IGSF3; immunoglobulin superfamily member 3	--	--	--	Immunoglobulin V-set domain;; Immunoglobulin I-set domain;; Immunoglobulin domain;; Immunoglobulin domain;; Immunoglobulin domain;; Domain of unknown function (DUF3821);; Alphaherpesvirus glycoprotein I	Immunoglobulin superfamily member 3 (Precursor) GN=igsf3 OS=Xenopus tropicalis (Western clawed frog) PE=2 SV=1	T	Signal transduction mechanisms	PREDICTED: LOW QUALITY PROTEIN: immunoglobulin superfamily member 3 [Gallus gallus]
gene16319	545	200	576	575	534	904	903	1527	722	634	4.30649	2.5514	4.21929	3.70899	4.60317	7.59234	4.39099	11.5681	6.86306	4.15198	0.00646215	1.47071	up	--	--	Cellular Component: mitochondrion (GO:0005739);;	--	--	--	--	Transmembrane protein 223	Transmembrane protein 186 GN=tmem186 OS=Danio rerio (Zebrafish) PE=2 SV=1	S	Function unknown	PREDICTED: transmembrane protein 186 [Gallus gallus]
gene16320	728	714	702	495	970	1734	3317	2380	984	2120	3.32608	2.93659	2.80295	1.61489	4.1731	10.7038	12.7692	12.4364	5.33688	9.71016	1.09305e-06	1.98833	up	[E]	Amino acid transport and metabolism	Molecular Function: 4-aminobutyrate transaminase activity (GO:0003867);; Biological Process: gamma-aminobutyric acid metabolic process (GO:0009448);; Molecular Function: pyridoxal phosphate binding (GO:0030170);; Cellular Component: 4-aminobutyrate transaminase complex (GO:0032144);; Molecular Function: protein homodimerization activity (GO:0042803);; Biological Process: behavioral response to co…	K13524|0|gga:416642|K13524 4-aminobutyrate aminotransferase / (S)-3-amino-2-methylpropionate transaminase [EC:2.6.1.19 2.6.1.22] | (RefSeq) ABAT; 4-aminobutyrate aminotransferase	Alanine, aspartate and glutamate metabolism (ko00250);; Valine, leucine and isoleucine degradation (ko00280);; beta-Alanine metabolism (ko00410);; Propanoate metabolism (ko00640);; Butanoate metabolism (ko00650)	[E]	Amino acid transport and metabolism	Aminotransferase class-III	Ethanolamine-phosphate phospho-lyase GN=etnppl OS=Danio rerio (Zebrafish) PE=2 SV=1	E	Amino acid transport and metabolism	PREDICTED: 4-aminobutyrate aminotransferase, mitochondrial isoform X6 [Gallus gallus]
gene16328	552	1283	551	578	704	128	157	102	122	245	3.19543	7.08016	3.07476	2.64805	4.20528	1.11068	1.07838	0.624789	0.967263	1.59161	0.00381847	-1.81259	down	--	--	Molecular Function: nucleotide binding (GO:0000166);; Molecular Function: RNA binding (GO:0003723);; Cellular Component: nucleus (GO:0005634);; Biological Process: mRNA processing (GO:0006397);; Biological Process: regulation of RNA splicing (GO:0043484);;	K14946|0|apla:101803943|K14946 RNA binding protein fox-1 | (RefSeq) RBFOX1; RNA binding protein, fox-1 homolog 1	--	[R]	General function prediction only	Calcitonin gene-related peptide regulator C terminal;; RNA recognition motif. (a.k.a. RRM, RBD, or RNP domain);; RNA recognition motif (a.k.a. RRM, RBD, or RNP domain);; RNA recognition motif. (a.k.a. RRM, RBD, or RNP domain)	RNA binding protein fox-1 homolog 1 GN=rbfox1 OS=Danio rerio (Zebrafish) PE=2 SV=1	R	General function prediction only	PREDICTED: RNA binding protein fox-1 homolog 1 isoform X30 [Gallus gallus]
gene16407	1192	839	929	1712	1187	1867	1677	1318	1699	2024	8.70684	5.58936	6.10937	9.58562	8.48041	15.97	10.5991	9.57865	14.642	14.9804	0.000623865	1.07715	up	[R]	General function prediction only	--	K20408|0|phi:102100908|K20408 WD repeat-containing protein 24 | (RefSeq) WDR24; WD repeat domain 24	mTOR signaling pathway (ko04150)	[S]	Function unknown	WD domain, G-beta repeat	WD repeat-containing protein 24 GN=WDR24 OS=Gallus gallus (Chicken) PE=2 SV=1	S	Function unknown	PREDICTED: WD repeat-containing protein 24 [Meleagris gallopavo]
gene16416	931	1048	1282	882	810	1507	2471	2178	814	1597	8.68442	8.90564	10.7321	6.50087	7.38545	16.5607	19.9656	20.1891	8.93202	14.7687	0.000755265	1.2698	up	[F]	Nucleotide transport and metabolism	Molecular Function: nucleoside diphosphate kinase activity (GO:0004550);; Molecular Function: ATP binding (GO:0005524);; Biological Process: GTP biosynthetic process (GO:0006183);; Biological Process: UTP biosynthetic process (GO:0006228);; Biological Process: CTP biosynthetic process (GO:0006241);;	K00940|7.51064e-122|gga:416399|K00940 nucleoside-diphosphate kinase [EC:2.7.4.6] | (RefSeq) NME3, null; NME/NM23 nucleoside diphosphate kinase 3	Purine metabolism (ko00230);; Pyrimidine metabolism (ko00240)	[F]	Nucleotide transport and metabolism	Nucleoside diphosphate kinase	Nucleoside diphosphate kinase OS=Columba livia (Domestic pigeon) PE=2 SV=2	F	Nucleotide transport and metabolism	nucleoside diphosphate kinase 3 precursor [Gallus gallus]
gene16483	736	929	1160	1012	748	945	1789	1746	961	1539	6.14205	7.03164	8.62946	6.76114	6.13148	9.04322	13.1249	14.736	9.52112	12.8714	0.000453247	1.0974	up	--	--	Molecular Function: RNA binding (GO:0003723);;	K06963|0|gga:426998|K06963 tRNA acetyltransferase TAN1 | (RefSeq) THUMPD1; THUMP domain containing 1	--	[R]	General function prediction only	THUMP domain	--	R	General function prediction only	PREDICTED: THUMP domain-containing protein 1 [Gallus gallus]
gene16538	397	140	375	37	416	637	594	402	359	595	2.19535	0.700982	1.86333	0.161479	2.24367	4.1533	2.84183	2.20725	2.33668	3.26113	0.00119638	1.37404	up	--	--	--	--	--	--	--	--	--	--	--	PREDICTED: uncharacterized protein LOC425455 isoform X2 [Gallus gallus]
gene1660	8100	6547	8457	8474	6741	2523	2947	2318	2001	2934	39.2547	28.5242	36.7347	32.7668	31.6207	14.2377	12.2691	11.0497	11.2148	13.8694	0.000507492	-1.08967	down	[G]	Carbohydrate transport and metabolism	--	K00700|0|gga:427964|K00700 1,4-alpha-glucan branching enzyme [EC:2.4.1.18] | (RefSeq) GBE1; 1,4-alpha-glucan branching enzyme 1	Starch and sucrose metabolism (ko00500)	[G]	Carbohydrate transport and metabolism	Alpha amylase, C-terminal all-beta domain;; Alpha amylase, catalytic domain	--	G	Carbohydrate transport and metabolism	PREDICTED: 1,4-alpha-glucan-branching enzyme [Gallus gallus]
gene16628	286	243	253	377	205	17	90	126	45	104	1.61591	1.10996	1.2554	1.64056	1.14588	0.087897	0.37535	0.696524	0.267041	0.557473	0.043639	-1.37668	down	--	--	Cellular Component: nucleolus (GO:0005730);; Cellular Component: integral component of membrane (GO:0016021);; Cellular Component: nuclear membrane (GO:0031965);; Biological Process: ribosome biogenesis (GO:0042254);;	K14771|0|gga:416798|K14771 U3 small nucleolar RNA-associated protein 19 | (RefSeq) NOC4L, EP400; nucleolar complex associated 4 homolog	--	[J]	Translation, ribosomal structure and biogenesis	CBF/Mak21 family	Nucleolar complex protein 4 homolog GN=NOC4L OS=Gallus gallus (Chicken) PE=2 SV=1	J	Translation, ribosomal structure and biogenesis	nucleolar complex protein 4 homolog [Gallus gallus]
gene16635	1099	1570	1519	1374	1084	2118	3370	1900	700	2100	6.02229	7.40474	7.57653	6.03902	5.81246	14.7908	16.6755	10.7875	5.13456	11.7596	0.0312769	1.08941	up	--	--	--	K08486|1.74742e-118|mgp:100548921|K08486 syntaxin 1B/2/3 | (RefSeq) STX2; syntaxin 2	SNARE interactions in vesicular transport (ko04130)	[U]	Intracellular trafficking, secretion, and vesicular transport	Syntaxin;; Syntaxin-like protein;; SNARE domain	--	U	Intracellular trafficking, secretion, and vesicular transport	Syntaxin-2, partial [Pelecanus crispus]
gene16645	250	112	199	216	184	56	40	45	60	58	0.906694	0.37108	0.651353	0.619469	0.653175	0.236946	0.124961	0.160426	0.255546	0.207621	0.0477879	-1.36184	down	--	--	--	K17599|0|gga:416809|K17599 transmembrane protein 132 | (RefSeq) TMEM132C; transmembrane protein 132C	--	[S]	Function unknown	--	--	S	Function unknown	PREDICTED: transmembrane protein 132C isoform X3 [Gallus gallus]
gene16665	105	95	88	96	38	402	632	332	338	414	0.389232	0.299903	0.281968	0.262023	0.127971	2.25609	3.06401	1.1954	1.71589	1.76016	1.1768e-09	2.82988	up	--	--	--	K16452|2.23505e-175|gga:416817|K16452 coiled-coil domain-containing protein 92 | (RefSeq) CCDC92; coiled-coil domain containing 92	--	--	--	Coiled-coil domain of unknown function	--	S	Function unknown	PREDICTED: coiled-coil domain-containing protein 92 isoform X3 [Gallus gallus]
gene16677	85	1055	172	940	29	531	545	1790	2289	2796	1.17959	5.81736	1.7819	4.433	0.330009	3.46476	4.19377	7.40978	10.5276	11.8634	0.03951	2.37787	up	[R]	General function prediction only	Molecular Function: nucleotide binding (GO:0000166);; Molecular Function: nucleic acid binding (GO:0003676);;	K13155|2.40344e-150|gga:416823|K13155 U11/U12 small nuclear ribonucleoprotein 35 kDa protein | (RefSeq) SNRNP35, U1SNRNPBP; small nuclear ribonucleoprotein U11/U12 subunit 35	--	[A]	RNA processing and modification	RNA recognition motif. (a.k.a. RRM, RBD, or RNP domain);; RNA recognition motif (a.k.a. RRM, RBD, or RNP domain);; RNA recognition motif. (a.k.a. RRM, RBD, or RNP domain)	U11/U12 small nuclear ribonucleoprotein 35 kDa protein GN=snrnp35 OS=Xenopus laevis (African clawed frog) PE=2 SV=1	A	RNA processing and modification	U11/U12 small nuclear ribonucleoprotein 35 kDa protein [Gallus gallus]
gene16745	9740	11659	11418	9746	13800	13183	16962	18787	13925	17598	86.5726	94.4581	91.3453	68.4908	119.843	138.148	130.538	166.142	145.937	155.082	0.00492213	1.00421	up	[C]	Energy production and conversion	Cellular Component: mitochondrion (GO:0005739);; Molecular Function: oxidoreductase activity, acting on the aldehyde or oxo group of donors, NAD or NADP as acceptor (GO:0016620);; Biological Process: oxidation-reduction process (GO:0055114);;	K00128|0|phi:102102503|K00128 aldehyde dehydrogenase (NAD+) [EC:1.2.1.3] | (RefSeq) ALDH2; aldehyde dehydrogenase 2 family (mitochondrial)	Glycolysis / Gluconeogenesis (ko00010);; Pentose and glucuronate interconversions (ko00040);; Ascorbate and aldarate metabolism (ko00053);; Fatty acid degradation (ko00071);; Valine, leucine and isoleucine degradation (ko00280);; Lysine degradation (ko00310);; Arginine and proline metabolism (ko00330);; Histidine metabolism (ko00340);; Tryptophan metabolism (ko00380);; beta-Alanine metabolism (ko…	[C]	Energy production and conversion	Aldehyde dehydrogenase family	Retinal dehydrogenase 2 GN=ALDH1A2 OS=Gallus gallus (Chicken) PE=2 SV=2	C	Energy production and conversion	PREDICTED: aldehyde dehydrogenase, mitochondrial isoformX2 [Gallus gallus]
gene16746	1201	1240	1002	996	1036	1458	1997	2369	2035	1479	4.50232	4.59862	3.62412	3.15329	3.96111	7.1212	6.4862	9.01176	9.49297	5.90377	3.20949e-05	1.28467	up	[RTKL]	General function prediction only;; Signal transduction mechanisms;; Transcription;; Replication, recombination and repair	Molecular Function: p53 binding (GO:0002039);; Molecular Function: protein serine/threonine kinase activity (GO:0004674);; Molecular Function: ATP binding (GO:0005524);; Cellular Component: nucleus (GO:0005634);; Cellular Component: cytoplasm (GO:0005737);; Biological Process: regulation of translation (GO:0006417);; Biological Process: Ras protein signal transduction (GO:0007265);; Biological Pr…	K04442|0|phi:102102877|K04442 mitogen-activated protein kinase-activated protein kinase 5 [EC:2.7.11.1] | (RefSeq) MAPKAPK5; mitogen-activated protein kinase-activated protein kinase 5	MAPK signaling pathway (ko04010)	[T]	Signal transduction mechanisms	Protein kinase domain;; Protein tyrosine kinase;; Lipopolysaccharide kinase (Kdo/WaaP) family	Ribosomal protein S6 kinase alpha-5 GN=RPS6KA5 OS=Gallus gallus (Chicken) PE=2 SV=1	T	Signal transduction mechanisms	PREDICTED: MAP kinase-activated protein kinase 5 isoform X1 [Nipponia nippon]
gene16774	511	849	1007	633	1066	31	132	17	173	107	1.38918	2.88651	3.90339	1.47427	4.83796	0.095108	0.30834	0.043487	0.569786	0.288875	3.073e-08	-2.63015	down	[I]	Lipid transport and metabolism	--	K01946|0|gga:430557|K01946 acetyl-CoA carboxylase / biotin carboxylase 2 [EC:6.4.1.2 6.3.4.14] | (RefSeq) ACACB; acetyl-CoA carboxylase beta	Fatty acid biosynthesis (ko00061);; Pyruvate metabolism (ko00620);; Propanoate metabolism (ko00640);; Insulin signaling pathway (ko04910);; Adipocytokine signaling pathway (ko04920)	[I]	Lipid transport and metabolism	Acetyl-CoA carboxylase, central region;; Carboxyl transferase domain;; Carbamoyl-phosphate synthase L chain, ATP binding domain;; Carbamoyl-phosphate synthase L chain, N-terminal domain;; Biotin carboxylase C-terminal domain;; Biotin-requiring enzyme;; ATP-grasp domain;; D-ala D-ala ligase C-terminus	Biotin carboxylase GN=ACAC OS=Gallus gallus (Chicken) PE=1 SV=1	I	Lipid transport and metabolism	PREDICTED: acetyl-CoA carboxylase 2 isoform X1 [Meleagris gallopavo]
gene16778	2590	2045	2295	1981	2387	3458	4350	3998	2827	2623	13.3612	8.77733	11.2766	8.07239	9.75155	20.2786	17.6661	19.0927	14.1862	11.8559	0.000183999	1.11156	up	[O]	Posttranslational modification, protein turnover, chaperones	--	K10588|0|mgp:100550203|K10588 ubiquitin-protein ligase E3 B [EC:2.3.2.26] | (RefSeq) UBE3B; ubiquitin protein ligase E3B	Ubiquitin mediated proteolysis (ko04120)	[O]	Posttranslational modification, protein turnover, chaperones	HECT-domain (ubiquitin-transferase)	Ubiquitin-protein ligase E3B GN=ube3b OS=Xenopus tropicalis (Western clawed frog) PE=2 SV=1	O	Posttranslational modification, protein turnover, chaperones	PREDICTED: ubiquitin-protein ligase E3B isoform X2 [Meleagris gallopavo]
gene16851	3801	3164	5136	5344	4439	5594	8495	6847	6556	4477	15.353	11.6491	18.6718	17.0675	17.5198	26.6401	29.7105	27.5186	31.2227	17.9295	0.00126701	1.07543	up	--	--	Biological Process: blood vessel development (GO:0001568);; Biological Process: heart development (GO:0007507);; Biological Process: animal organ morphogenesis (GO:0009887);; Biological Process: anterior/posterior pattern specification (GO:0009952);; Biological Process: thymus development (GO:0048538);; Biological Process: parathyroid gland development (GO:0060017);;	K04438|0|mgp:100538907|K04438 proto-oncogene C-crk | (RefSeq) CRKL; CRK like proto-oncogene, adaptor protein	MAPK signaling pathway (ko04010);; ErbB signaling pathway (ko04012);; Focal adhesion (ko04510);; Regulation of actin cytoskeleton (ko04810);; Insulin signaling pathway (ko04910)	[T]	Signal transduction mechanisms	Variant SH3 domain;; SH2 domain;; SH3 domain;; Variant SH3 domain	Adapter molecule crk GN=CRK OS=Gallus gallus (Chicken) PE=1 SV=1	T	Signal transduction mechanisms	PREDICTED: v-crk sarcoma virus CT10 oncogene homolog-like [Gallus gallus]
gene16853	1699	1894	2167	1806	2252	3191	4518	3325	2802	3000	11.0467	11.3074	12.5665	9.51076	14.4239	25.2992	26.1901	22.0898	22.1454	19.9237	7.21046e-06	1.27636	up	--	--	Biological Process: mitotic sister chromatid segregation (GO:0000070);; Cellular Component: cytoplasm (GO:0005737);; Cellular Component: centrosome (GO:0005813);; Cellular Component: polar microtubule (GO:0005827);; Biological Process: protein monoubiquitination (GO:0006513);; Biological Process: mitotic spindle assembly checkpoint (GO:0007094);; Cellular Component: Cul3-RING ubiquitin ligase com…	K10459|0|mgp:100546268|K10459 kelch-like protein 22 | (RefSeq) KLHL22; kelch like family member 22	--	[TR]	Signal transduction mechanisms;; General function prediction only	Kelch motif;; Kelch motif;; BTB/POZ domain;; Kelch motif;; Galactose oxidase, central domain;; Galactose oxidase, central domain;; BTB And C-terminal Kelch;; Kelch motif	Kelch-like protein 22 GN=klhl22 OS=Xenopus tropicalis (Western clawed frog) PE=2 SV=1	T	Signal transduction mechanisms	PREDICTED: kelch-like protein 22 isoform X3 [Gallus gallus]
gene16908	936	846	1077	1026	981	1551	2361	2176	1640	1574	5.59146	4.5907	5.95538	4.796	5.14546	11.281	12.4751	13.1291	11.4871	9.36734	5.41405e-07	1.44115	up	[R]	General function prediction only	Molecular Function: nucleotide binding (GO:0000166);; Cellular Component: nucleus (GO:0005634);; Cellular Component: cytoplasm (GO:0005737);; Cellular Component: polysome (GO:0005844);; Biological Process: central nervous system development (GO:0007417);; Molecular Function: poly(U) RNA binding (GO:0008266);;	K14411|0|phi:102109538|K14411 RNA-binding protein Musashi | (RefSeq) MSI1; musashi RNA binding protein 1	mRNA surveillance pathway (ko03015)	[A]	RNA processing and modification	RNA recognition motif. (a.k.a. RRM, RBD, or RNP domain);; RNA recognition motif (a.k.a. RRM, RBD, or RNP domain);; RNA recognition motif. (a.k.a. RRM, RBD, or RNP domain)	DAZ-associated protein 1 GN=dazap1 OS=Xenopus laevis (African clawed frog) PE=1 SV=1	A	RNA processing and modification	PREDICTED: RNA-binding protein Musashi homolog 1 isoform X5 [Chrysemys picta bellii]
gene16919	1720	787	1282	1244	996	291	283	233	298	215	4.36991	1.77749	2.88632	2.45665	2.58217	0.802403	0.592381	0.547901	0.753545	0.482413	6.79049e-05	-1.66206	down	[RTKL]	General function prediction only;; Signal transduction mechanisms;; Transcription;; Replication, recombination and repair	Biological Process: mitotic sister chromatid segregation (GO:0000070);; Biological Process: cytokinesis (GO:0000910);; Cellular Component: ruffle (GO:0001726);; Molecular Function: protein serine/threonine kinase activity (GO:0004674);; Molecular Function: GTPase regulator activity (GO:0005083);; Molecular Function: ATP binding (GO:0005524);; Molecular Function: phospholipid binding (GO:0005543);…	K16308|0|gga:416984|K16308 citron Rho-interacting kinase [EC:2.7.11.1] | (RefSeq) CIT; citron rho-interacting serine/threonine kinase	--	[T]	Signal transduction mechanisms	CNH domain;; Protein kinase domain;; Protein tyrosine kinase	RAC-beta serine/threonine-protein kinase A GN=akt2-a OS=Xenopus laevis (African clawed frog) PE=2 SV=1	T	Signal transduction mechanisms	PREDICTED: citron Rho-interacting kinase isoform X11 [Gallus gallus]
gene16938	1690	3475	2047	3477	1527	534	632	661	443	1250	24.5044	45.8999	26.709	39.8684	21.6516	9.11286	7.9223	9.51672	7.5639	17.9666	0.00510141	-1.30734	down	--	--	--	--	--	--	--	Sep15/SelM redox domain	Selenoprotein M (Precursor) GN=sepm OS=Xenopus laevis (African clawed frog) PE=2 SV=2	R	General function prediction only	selenoprotein M precursor [Gallus gallus]
gene16977	145	164	155	210	113	42	22	41	7	66	1.77283	1.47669	1.74294	2.01306	1.20795	0.506249	0.213642	0.490706	0.093404	0.705896	0.0204996	-1.66596	down	--	--	--	K05419|1.88214e-152|gga:427718|K05419 leukemia inhibitory factor | (RefSeq) LIF; leukemia inhibitory factor	Cytokine-cytokine receptor interaction (ko04060)	--	--	LIF / OSM family	--	K	Transcription	PREDICTED: leukemia inhibitory factor [Gallus gallus]
gene16979	312	339	448	469	758	59	207	132	41	165	2.7111	2.85581	3.60427	3.31078	6.55476	0.559637	1.6701	1.2041	0.394047	1.61046	0.0271552	-1.53174	down	[I]	Lipid transport and metabolism	Molecular Function: acyl-CoA dehydrogenase activity (GO:0003995);; Biological Process: oxidation-reduction process (GO:0055114);;	--	--	[I]	Lipid transport and metabolism	Acyl-CoA dehydrogenase, C-terminal domain;; Acyl-CoA dehydrogenase, middle domain;; Acyl-CoA dehydrogenase, C-terminal domain	--	I	Lipid transport and metabolism	PREDICTED: putative acyl-CoA dehydrogenase AidB-like isoform X2 [Gallus gallus]
gene17024	3097	4391	3520	4834	3827	948	1159	982	945	2703	29.4858	37.7438	29.893	36.2565	34.7517	10.508	9.47765	9.26682	10.4978	25.4868	0.00050068	-1.08203	down	--	--	--	--	--	[T]	Signal transduction mechanisms	Phospholipase B	Phospholipase B (Precursor) OS=Crotalus adamanteus (Eastern diamondback rattlesnake) PE=1 SV=1	T	Signal transduction mechanisms	PREDICTED: putative phospholipase B-like 2 [Ficedula albicollis]
gene17055	829	584	532	886	828	1023	1527	1113	861	1122	9.72921	6.24757	5.62461	8.22495	9.50229	14.1671	15.5261	12.9999	11.9231	13.0614	0.000776961	1.11253	up	--	--	--	K20462|2.73101e-126|mgp:100548358|K20462 oxysterol-binding protein 2 | (RefSeq) OSBP2; oxysterol binding protein 2	--	[I]	Lipid transport and metabolism	Oxysterol-binding protein	--	T	Signal transduction mechanisms	PREDICTED: oxysterol-binding protein 2 [Meleagris gallopavo]
gene17068	1603	1553	2424	2622	1676	494	314	608	367	1360	5.28224	5.22937	8.37833	7.30038	5.44237	1.37186	1.11263	2.67656	1.42177	4.06696	0.00122897	-1.1753	down	--	--	--	K06252|0|apla:101794275|K06252 tenascin | (RefSeq) TNXB, Tenascin-X; tenascin XB	Focal adhesion (ko04510);; ECM-receptor interaction (ko04512)	[TW]	Signal transduction mechanisms;; Extracellular structures	Fibronectin type III domain;; Fibrinogen beta and gamma chains, C-terminal globular domain;; Salmonella repeat of unknown function (DUF824);; Bacterial protein of unknown function (DUF903)	Tenascin (Precursor) GN=TNC OS=Gallus gallus (Chicken) PE=1 SV=2	W	Extracellular structures	PREDICTED: tenascin-X [Anas platyrhynchos]
gene17088	7107	6390	4261	4950	4931	716	499	1083	1199	2302	44.785	37.4331	25.9553	25.3997	33.4358	6.46858	3.59829	8.29804	9.7139	14.7732	4.07606e-06	-1.78284	down	--	--	--	--	--	[O]	Posttranslational modification, protein turnover, chaperones	SPRY-associated domain;; SPRY domain;; BRE1 E3 ubiquitin ligase	Zinc-binding protein A33 OS=Pleurodeles waltl (Iberian ribbed newt) PE=1 SV=2	O	Posttranslational modification, protein turnover, chaperones	B-butyrophilin 1 [Meleagris gallopavo]
gene17110	8828	8193	9384	10973	6317	1448	2338	1364	1917	2804	83.0505	72.3842	85.2485	87.9633	54.3453	17.0568	20.2937	12.8677	21.5293	27.85	1.36195e-08	-1.64814	down	--	--	Cellular Component: nucleus (GO:0005634);; Cellular Component: cytoplasm (GO:0005737);; Molecular Function: zinc ion binding (GO:0008270);;	K12000|0|gga:417040|K12000 tripartite motif-containing protein 7 | (RefSeq) TRIM7.1, TRIM7; tripartite motif containing 7.1	--	[O]	Posttranslational modification, protein turnover, chaperones	SPRY domain;; SPRY-associated domain;; zinc finger of C3HC4-type, RING;; Zinc finger, C3HC4 type (RING finger);; B-box zinc finger;; Zinc finger, C3HC4 type (RING finger);; Zinc finger, C3HC4 type (RING finger)	Nuclear factor 7, ovary OS=Xenopus laevis (African clawed frog) PE=2 SV=1	O	Posttranslational modification, protein turnover, chaperones	PREDICTED: tripartite motif-containing protein 7 isoform X1 [Meleagris gallopavo]
gene17260	634	935	757	1154	718	1144	1799	1486	1253	1563	6.85018	9.23003	7.19462	9.89676	6.79621	14.2397	14.5589	15.198	15.7223	16.5241	2.30254e-05	1.29922	up	--	--	--	K01276|0|gga:417297|K01276 dipeptidyl-peptidase II [EC:3.4.14.2] | (RefSeq) DPP7; dipeptidyl peptidase 7	--	[OR]	Posttranslational modification, protein turnover, chaperones;; General function prediction only	Serine carboxypeptidase S28;; Alpha/beta hydrolase family	--	O	Posttranslational modification, protein turnover, chaperones	PREDICTED: dipeptidyl peptidase 2 [Gallus gallus]
gene17265	8304	5491	7249	11323	5801	1918	2009	1771	1310	4172	67.8298	40.8058	53.2706	73.2505	46.3042	18.4413	14.0983	14.2815	12.6198	33.769	0.000245568	-1.29539	down	[GO]	Carbohydrate transport and metabolism;; Posttranslational modification, protein turnover, chaperones	Molecular Function: ATP binding (GO:0005524);; Cellular Component: integral component of membrane (GO:0016021);; Molecular Function: hydrolase activity (GO:0016787);;	K01509|0|gga:395797|K01509 adenosinetriphosphatase [EC:3.6.1.3] | (RefSeq) ENTPD2; ectonucleoside triphosphate diphosphohydrolase 2	Purine metabolism (ko00230)	[F]	Nucleotide transport and metabolism	GDA1/CD39 (nucleoside phosphatase) family	Ectonucleoside triphosphate diphosphohydrolase 2 GN=ENTPD2 OS=Gallus gallus (Chicken) PE=1 SV=2	F	Nucleotide transport and metabolism	ectonucleoside triphosphate diphosphohydrolase 2 precursor [Gallus gallus]
gene17276	4521	5851	3445	2349	5552	1010	1055	959	1131	2300	129.382	152.632	88.7436	53.1527	155.272	34.0502	26.1423	27.2953	38.1404	65.25	0.0199104	-1.30159	down	--	--	Molecular Function: transporter activity (GO:0005215);; Molecular Function: fatty acid binding (GO:0005504);; Cellular Component: extracellular space (GO:0005615);; Cellular Component: rough endoplasmic reticulum (GO:0005791);; Biological Process: lipid metabolic process (GO:0006629);; Biological Process: transport (GO:0006810);; Molecular Function: small molecule binding (GO:0036094);; Biologica…	K01830|2.43821e-124|gga:374110|K01830 prostaglandin-H2 D-isomerase [EC:5.3.99.2] | (RefSeq) PTGDS, L-PGDS, LPGDS, PDS, PGD2, PGDS, PGDS2; prostaglandin D2 synthase 21kDa (brain)	Arachidonic acid metabolism (ko00590)	--	--	Lipocalin / cytosolic fatty-acid binding protein family	Lipocalin (Precursor) OS=Bufo marinus (Giant toad) PE=1 SV=1	M	Cell wall/membrane/envelope biogenesis	prostaglandin-H2 D-isomerase precursor [Gallus gallus]
gene17322	1137	906	1030	994	1341	276	314	305	153	712	2.66164	1.97706	2.18705	1.92647	3.13688	0.7619	0.62839	0.682155	0.374921	1.6782	0.00429654	-1.19192	down	--	--	Cellular Component: nucleus (GO:0005634);; Cellular Component: cytoplasm (GO:0005737);; Biological Process: cellular response to gonadotropin stimulus (GO:0071371);; Biological Process: positive regulation of neuron migration (GO:2001224);;	--	--	--	--	--	NMDA receptor synaptonuclear signaling and neuronal migration factor GN=nsmf OS=Danio rerio (Zebrafish) PE=2 SV=1	K	Transcription	PREDICTED: NMDA receptor synaptonuclear signaling and neuronal migration factor isoform X7 [Gallus gallus]
gene17386	40031	53529	40455	66576	40784	61131	75001	73981	67442	85975	894.269	1198.91	881.365	1307.11	905.662	1726.03	1552.77	1618.77	1818.47	2035.56	0.00377933	1.10833	up	[F]	Nucleotide transport and metabolism	Cellular Component: outer dense fiber (GO:0001520);; Molecular Function: adenylate kinase activity (GO:0004017);; Molecular Function: nucleoside diphosphate kinase activity (GO:0004550);; Molecular Function: ATP binding (GO:0005524);; Cellular Component: cytoplasm (GO:0005737);; Cellular Component: plasma membrane (GO:0005886);; Biological Process: nucleoside diphosphate phosphorylation (GO:00061…	K00939|1.60454e-136|gga:396002|K00939 adenylate kinase [EC:2.7.4.3] | (RefSeq) AK1; adenylate kinase 1	Purine metabolism (ko00230)	[F]	Nucleotide transport and metabolism	Adenylate kinase;; AAA domain;; AAA domain;; AAA domain	Adenylate kinase isoenzyme 1 {ECO:0000255|HAMAP-Rule:MF_03171} OS=Gallus gallus (Chicken) PE=1 SV=1	F	Nucleotide transport and metabolism	PREDICTED: adenylate kinase isoenzyme 1 isoform X1 [Meleagris gallopavo]
gene17459	3622	1549	3179	3883	3427	4797	6195	4677	4518	4020	15.4071	5.96303	12.1432	12.9678	14.1414	23.8908	22.6561	19.6538	22.5019	16.8587	0.000229916	1.14222	up	--	--	--	--	--	--	--	--	--	S	Function unknown	PREDICTED: protein FAM78A [Gallus gallus]
gene1749	1133	1591	1299	1451	1023	2626	3428	4036	1986	3244	8.18667	10.0554	8.52967	7.76029	6.44275	22.8584	29.2695	31.7398	17.942	21.7195	1.32368e-10	1.73671	up	[F]	Nucleotide transport and metabolism	Molecular Function: phosphoribosylamine-glycine ligase activity (GO:0004637);; Molecular Function: phosphoribosylformylglycinamidine cyclo-ligase activity (GO:0004641);; Molecular Function: phosphoribosylglycinamide formyltransferase activity (GO:0004644);; Molecular Function: ATP binding (GO:0005524);; Cellular Component: cytosol (GO:0005829);; Biological Process: 'de novo' IMP biosynthetic proc…	K11787|0|gga:395315|K11787 phosphoribosylamine--glycine ligase / phosphoribosylglycinamide formyltransferase / phosphoribosylformylglycinamidine cyclo-ligase [EC:6.3.4.13 2.1.2.2 6.3.3.1] | (RefSeq) GART, AIRS, GARS, GART-A; phosphoribosylglycinamide formyltransferase, phosphoribosylglycinamide synthetase, phosphoribosylaminoimidazole synthetase	Purine metabolism (ko00230);; One carbon pool by folate (ko00670)	[F]	Nucleotide transport and metabolism	Phosphoribosylglycinamide synthetase, ATP-grasp (A) domain;; Formyl transferase;; Phosphoribosylglycinamide synthetase, N domain;; AIR synthase related protein, C-terminal domain;; Phosphoribosylglycinamide synthetase, C domain;; AIR synthase related protein, N-terminal domain;; ATP-grasp domain;; ATP-grasp domain	Phosphoribosylglycinamide formyltransferase GN=GART OS=Gallus gallus (Chicken) PE=2 SV=1	F	Nucleotide transport and metabolism	glycinamide ribonucleotide synthetase-aminoimidazole ribonucleotide synthetase-glycinamide ribonucleotide transformylase [Gallus gallus]
gene17515	2904	1325	6161	5006	5156	6036	10131	11659	7433	7308	10.4277	4.34169	19.9851	14.204	18.0882	25.5432	30.8538	41.1729	31.4287	25.5809	9.67634e-06	1.56495	up	--	--	Biological Process: negative regulation of transcription from RNA polymerase II promoter (GO:0000122);; Cellular Component: nuclear chromatin (GO:0000790);; Biological Process: in utero embryonic development (GO:0001701);; Biological Process: maternal placenta development (GO:0001893);; Molecular Function: steroid hormone receptor activity (GO:0003707);; Molecular Function: 9-cis retinoic acid re…	K08524|0|gga:417143|K08524 retinoid X receptor alpha | (RefSeq) RXRA; retinoid X receptor alpha	PPAR signaling pathway (ko03320);; Adipocytokine signaling pathway (ko04920)	[T]	Signal transduction mechanisms	Ligand-binding domain of nuclear hormone receptor;; Nuclear/hormone receptor activator site AF-1;; Zinc finger, C4 type (two domains)	Retinoic acid receptor RXR-alpha GN=rxra OS=Xenopus laevis (African clawed frog) PE=1 SV=1	K	Transcription	PREDICTED: retinoic acid receptor RXR-alpha isoform X1 [Haliaeetus leucocephalus]
gene17530	287	414	346	494	317	62	130	65	73	232	2.0124	2.58925	2.14374	2.68566	2.16356	0.338249	0.519435	0.3919	0.394537	1.07537	0.0457151	-1.27589	down	--	--	--	--	--	--	--	Protein-kinase domain of FAM69;; N-term cysteine-rich ER, FAM69	Protein FAM69B GN=fam69b OS=Xenopus tropicalis (Western clawed frog) PE=2 SV=1	S	Function unknown	PREDICTED: protein FAM69B isoform 2 [Gallus gallus]
gene17531	343	464	662	624	738	111	272	145	103	273	2.69231	3.34302	4.68736	3.88537	5.67384	1.02639	1.85837	1.13372	0.950987	2.12969	0.0277116	-1.19866	down	[I]	Lipid transport and metabolism	Biological Process: positive regulation of cytokine production (GO:0001819);; Molecular Function: 1-acylglycerol-3-phosphate O-acyltransferase activity (GO:0003841);; Cellular Component: endoplasmic reticulum (GO:0005783);; Biological Process: phospholipid biosynthetic process (GO:0008654);; Cellular Component: membrane (GO:0016020);;	K13509|3.83792e-171|gga:772114|K13509 lysophosphatidate acyltransferase [EC:2.3.1.51] | (RefSeq) AGPAT2; 1-acylglycerol-3-phosphate O-acyltransferase 2	Glycerolipid metabolism (ko00561);; Glycerophospholipid metabolism (ko00564)	[I]	Lipid transport and metabolism	Acyltransferase	Lysophospholipid acyltransferase LPCAT4 GN=lpcat4 OS=Xenopus tropicalis (Western clawed frog) PE=2 SV=1	I	Lipid transport and metabolism	PREDICTED: 1-acyl-sn-glycerol-3-phosphate acyltransferase beta [Gallus gallus]
gene17554	6133	4552	5958	5620	4875	11697	16568	11494	8403	6344	56.5828	38.5088	49.4843	41.0163	43.9884	125.478	132.475	104.543	90.8276	57.0241	0.000220688	1.51681	up	--	--	Cellular Component: Golgi apparatus (GO:0005794);; Cellular Component: plasma membrane (GO:0005886);; Biological Process: protein ubiquitination (GO:0016567);;	K12174|0|gga:427754|K12174 Kip1 ubiquitination-promoting complex protein 2 | (RefSeq) UBAC1, UBADC1; UBA domain containing 1	--	--	--	UBA/TS-N domain	Ubiquitin-associated domain-containing protein 1 GN=UBAC1 OS=Gallus gallus (Chicken) PE=2 SV=1	S	Function unknown	PREDICTED: ubiquitin-associated domain-containing protein 1 isoform X1 [Haliaeetus leucocephalus]
gene17562	5005	3680	5285	7348	6198	957	1302	1619	1129	3364	94.3966	63.2518	89.7082	109.566	114.222	21.2749	21.2468	30.3652	25.1025	62.9019	0.000458705	-1.2596	down	[P]	Inorganic ion transport and metabolism	--	K03926|3.82048e-114|gga:417124|K03926 periplasmic divalent cation tolerance protein | (RefSeq) CUTA; cutA divalent cation tolerance homolog	--	[P]	Inorganic ion transport and metabolism	CutA1 divalent ion tolerance protein	Protein CutA homolog (Precursor) GN=cuta OS=Danio rerio (Zebrafish) PE=2 SV=1	P	Inorganic ion transport and metabolism	PREDICTED: protein CutA homolog [Gallus gallus]
gene17583	5330	4083	6244	4780	5077	7668	11063	7974	5885	4419	12.1862	8.31062	12.7317	8.47842	10.8234	20.2307	21.874	17.9041	15.62	9.68402	0.00675511	1.04539	up	--	--	Molecular Function: DNA binding (GO:0003677);; Molecular Function: zinc ion binding (GO:0008270);; Cellular Component: cell surface (GO:0009986);; Cellular Component: membrane (GO:0016020);;	K15690|0|gga:417109|K15690 RING finger and CCCH-type zinc finger domain-containing protein | (RefSeq) RC3H2, MNAB; ring finger and CCCH-type domains 2	--	[O]	Posttranslational modification, protein turnover, chaperones	Zinc finger C-x8-C-x5-C-x3-H type (and similar)	Roquin-1 GN=rc3h1 OS=Xenopus laevis (African clawed frog) PE=2 SV=1	O	Posttranslational modification, protein turnover, chaperones	PREDICTED: RING finger and CCCH-type zinc finger domain-containing protein 2 isoform X5 [Gallus gallus]
gene17589	1582	1211	1027	731	2032	2771	2389	3508	1768	1615	6.88481	4.55414	5.64499	3.57608	5.77428	11.4136	9.05379	15.9342	13.0467	8.84802	0.00745077	1.35932	up	--	--	Molecular Function: DNA binding (GO:0003677);; Molecular Function: double-stranded RNA binding (GO:0003725);; Molecular Function: single-stranded RNA binding (GO:0003727);; Cellular Component: nucleus (GO:0005634);; Cellular Component: cytoplasm (GO:0005737);; Biological Process: movement of cell or subcellular component (GO:0006928);; Biological Process: multicellular organism development (GO:00…	K13200|0|gga:417105|K13200 spermatid perinuclear RNA-binding protein | (RefSeq) STRBP; spermatid perinuclear RNA binding protein	--	[R]	General function prediction only	DZF domain;; Double-stranded RNA binding motif;; double strand RNA binding domain from DEAD END PROTEIN 1	Spermatid perinuclear RNA-binding protein GN=STRBP OS=Gallus gallus (Chicken) PE=2 SV=1	K	Transcription	PREDICTED: spermatid perinuclear RNA-binding protein isoform X8 [Meleagris gallopavo]
gene17593	768	697	605	424	363	127	86	78	279	246	4.22541	3.49098	2.99169	1.84106	1.94163	0.818296	0.407961	0.421113	1.93314	1.33732	0.0205564	-1.27544	down	--	--	--	K20160|0|gga:417102|K20160 DENN domain-containing protein 1 | (RefSeq) DENND1A; DENN domain containing 1A	--	[T]	Signal transduction mechanisms	--	DENN domain-containing protein 1A GN=dennd1a OS=Xenopus laevis (African clawed frog) PE=2 SV=1	R	General function prediction only	PREDICTED: DENN domain-containing protein 1A [Meleagris gallopavo]
gene17656	2110	2710	2438	1445	928	2619	3899	2994	1385	3188	13.0918	16.293	12.5361	7.14745	5.12658	19.3742	23.9979	16.8643	10.0478	17.9173	0.00343764	1.02325	up	[R]	General function prediction only	Molecular Function: nucleic acid binding (GO:0003676);; Molecular Function: metal ion binding (GO:0046872);;	--	--	[R]	General function prediction only	Zinc-finger double domain;; Zinc finger, C2H2 type;; C2H2-type zinc finger;; Zinc-finger double-stranded RNA-binding;; C2H2-type zinc finger;; CpXC protein;; KRAB box	Oocyte zinc finger protein XlCOF7.1 (Fragment) OS=Xenopus laevis (African clawed frog) PE=2 SV=1	K	Transcription	PREDICTED: zinc finger protein 502-like isoform X3 [Gallus gallus]
gene17665	394016	524339	276759	42942	165585	705	44132	26441	365	3155	2275.92	1619.45	844.422	115.082	548.619	18.8912	172.391	97.2918	2.87863	11.8672	0.00227742	-3.86626	down	[Z]	Cytoskeleton	Molecular Function: motor activity (GO:0003774);; Molecular Function: actin binding (GO:0003779);; Molecular Function: ATP binding (GO:0005524);; Cellular Component: myosin complex (GO:0016459);;	K10352|0|gga:768566|K10352 myosin heavy chain | (RefSeq) MYH1F; myosin, heavy chain 1F, skeletal muscle (similar to human myosin, heavy chain 1, skeletal muscle, adult)	Tight junction (ko04530)	[Z]	Cytoskeleton	Myosin tail;; Myosin head (motor domain);; Myosin N-terminal SH3-like domain	Myosin-3 GN=MYH3 OS=Gallus gallus (Chicken) PE=2 SV=3	Z	Cytoskeleton	PREDICTED: myosin-3 [Gallus gallus]
gene17669	416837	140166	369605	329105	381220	772926	772056	247073	465139	711514	1083.21	614.462	1158.38	1355.03	1368.4	7159.1	5337.41	2854.41	5158.2	4887.13	0.0122443	1.35016	up	[Z]	Cytoskeleton	Molecular Function: motor activity (GO:0003774);; Molecular Function: actin binding (GO:0003779);; Molecular Function: ATP binding (GO:0005524);; Cellular Component: myosin complex (GO:0016459);;	K10352|0|gga:374069|K10352 myosin heavy chain | (RefSeq) MYH1B, MYH3; myosin, heavy chain 1B, skeletal muscle (similar to human myosin, heavy chain 1, skeletal muscle, adult)	Tight junction (ko04530)	[Z]	Cytoskeleton	Myosin tail;; Myosin head (motor domain);; Myosin N-terminal SH3-like domain	Myosin heavy chain, skeletal muscle, adult OS=Gallus gallus (Chicken) PE=1 SV=4	Z	Cytoskeleton	myosin-3 [Gallus gallus]
gene17671	1246	47	30	145	215	36532	125586	17571	23847	36590	31.9973	0.635819	0.368646	0.428167	2.71611	459.505	615.301	440.593	657.165	637.988	7.00801e-06	7.50611	up	[Z]	Cytoskeleton	Molecular Function: motor activity (GO:0003774);; Molecular Function: actin binding (GO:0003779);; Molecular Function: calmodulin binding (GO:0005516);; Molecular Function: ATP binding (GO:0005524);; Cellular Component: myofibril (GO:0030016);; Cellular Component: myosin filament (GO:0032982);;	K10352|0|gga:427788|K10352 myosin heavy chain | (RefSeq) MYH1E; myosin, heavy chain 1E, skeletal muscle (similar to human myosin, heavy chain 1, skeletal muscle, adult)	Tight junction (ko04530)	[Z]	Cytoskeleton	Myosin tail;; Myosin head (motor domain);; Myosin N-terminal SH3-like domain	Myosin heavy chain, skeletal muscle, adult OS=Gallus gallus (Chicken) PE=1 SV=4	Z	Cytoskeleton	myosin heavy chain [Gallus gallus]
gene17673	50162	9525	50953	74415	84424	8224	7396	9408	6464	2703	170.341	29.4794	155.735	199.791	280.106	32.9245	21.7437	31.7819	25.8796	9.09695	0.00404343	-2.43341	down	[Z]	Cytoskeleton	Molecular Function: motor activity (GO:0003774);; Molecular Function: actin binding (GO:0003779);; Molecular Function: calmodulin binding (GO:0005516);; Molecular Function: ATP binding (GO:0005524);; Cellular Component: myofibril (GO:0030016);; Cellular Component: myosin filament (GO:0032982);;	K10352|0|gga:417310|K10352 myosin heavy chain | (RefSeq) MYH1C; myosin, heavy chain 1C, skeletal muscle (similar to human myosin, heavy chain 1, skeletal muscle, adult)	Tight junction (ko04530)	[Z]	Cytoskeleton	Myosin tail;; Myosin head (motor domain);; Myosin N-terminal SH3-like domain	Myosin heavy chain, skeletal muscle, adult OS=Gallus gallus (Chicken) PE=1 SV=4	Z	Cytoskeleton	myosin, heavy chain 1C, skeletal muscle (similar to human myosin, heavy chain 1, skeletal muscle, adult) [Gallus gallus]
gene17674	104223	98395	156125	119833	165088	586977	507873	897969	529025	271285	458.939	398.608	584.295	475.704	805.421	4088.46	3156.04	3515.88	5209.2	2255.83	3.94724e-05	2.65659	up	[Z]	Cytoskeleton	--	K10352|0|gga:427789|K10352 myosin heavy chain | (RefSeq) MYH1G, N101; myosin, heavy chain 1G, skeletal muscle (similar to human myosin, heavy chain 1, skeletal muscle, adult)	Tight junction (ko04530)	[Z]	Cytoskeleton	Myosin tail;; Myosin head (motor domain);; Myosin N-terminal SH3-like domain	Myosin heavy chain, skeletal muscle, adult OS=Gallus gallus (Chicken) PE=1 SV=4	Z	Cytoskeleton	PREDICTED: myosin heavy chain, skeletal muscle, adult isoform X1 [Gallus gallus]
gene17721	1791	1668	2033	1895	1521	2863	3599	2604	2185	2011	8.96854	7.96801	9.43206	7.37748	7.23205	16.2998	15.2126	12.717	12.4419	10.2299	0.000280078	1.09161	up	[OZ]	Posttranslational modification, protein turnover, chaperones;; Cytoskeleton	Molecular Function: GTPase activator activity (GO:0005096);; Biological Process: post-chaperonin tubulin folding pathway (GO:0007023);; Biological Process: negative regulation of microtubule polymerization (GO:0031115);; Biological Process: positive regulation of GTPase activity (GO:0043547);; Molecular Function: beta-tubulin binding (GO:0048487);;	--	--	[O]	Posttranslational modification, protein turnover, chaperones	Tubulin folding cofactor D C terminal;; HEAT repeat;; HEAT-like repeat	Tubulin-specific chaperone D GN=TBCD OS=Gallus gallus (Chicken) PE=2 SV=1	O	Posttranslational modification, protein turnover, chaperones	PREDICTED: tubulin-specific chaperone D [Meleagris gallopavo]
gene17735	3323	2553	2909	2801	2439	4732	5331	3964	3627	2941	13.654	9.56541	10.7563	9.10366	9.79068	22.9346	18.9775	16.2093	17.5909	11.9862	0.000611144	1.07284	up	[R]	General function prediction only	Molecular Function: lamin binding (GO:0005521);; Cellular Component: lamin filament (GO:0005638);;	--	--	[Y]	Nuclear structure	Iron only hydrogenase large subunit, C-terminal domain;; Iron hydrogenase small subunit	Nuclear prelamin A recognition factor GN=narf OS=Xenopus laevis (African clawed frog) PE=2 SV=1	Y	Nuclear structure	PREDICTED: nuclear prelamin A recognition factor isoform X2 [Gallus gallus]
gene17754	4926	5045	5128	5898	4579	7657	9905	7383	8249	5467	20.4932	19.1318	19.2037	19.4015	18.6124	37.5579	35.6796	30.5624	40.464	22.5515	0.000904876	1.12851	up	--	--	Biological Process: kidney development (GO:0001822);; Biological Process: sprouting angiogenesis (GO:0002040);; Molecular Function: single-stranded RNA binding (GO:0003727);; Molecular Function: receptor activity (GO:0004872);; Molecular Function: iron ion binding (GO:0005506);; Cellular Component: nucleoplasm (GO:0005654);; Cellular Component: nucleolus (GO:0005730);; Cellular Component: plasma …	K11323|0|gga:417355|K11323 histone arginine demethylase JMJD6 [EC:1.14.11.-] | (RefSeq) JMJD6, PTDSR; jumonji domain containing 6	--	[BT]	Chromatin structure and dynamics;; Signal transduction mechanisms	JmjC domain, hydroxylase;; Cupin-like domain	Bifunctional arginine demethylase and lysyl-hydroxylase JMJD6 GN=JMJD6 OS=Gallus gallus (Chicken) PE=2 SV=1	K	Transcription	PREDICTED: bifunctional arginine demethylase and lysyl-hydroxylase JMJD6 isoform X1 [Haliaeetus leucocephalus]
gene1779	0	0	0	0	0	760	1023	1078	715	441	0	0	0	0	0	2.66886	3.04691	3.88415	2.88284	1.78114	8.47259e-51	Inf	up	--	--	--	--	--	--	--	--	--	--	--	PREDICTED: uncharacterized protein LOC101748821 [Gallus gallus]
gene1780	133	195	567	725	143	6558	8545	7723	6151	6123	0.359916	0.482947	1.38998	1.56182	0.379338	21.6671	21.2582	21.7305	21.5622	17.6599	3.64371e-60	4.899	up	--	--	Biological Process: negative regulation of transcription from RNA polymerase II promoter (GO:0000122);; Molecular Function: DNA binding (GO:0003677);; Molecular Function: transcription factor activity, sequence-specific DNA binding (GO:0003700);; Molecular Function: signal transducer activity (GO:0004871);; Cellular Component: nucleus (GO:0005634);; Biological Process: embryonic pattern specifica…	K09100|0|gga:418515|K09100 single-minded | (RefSeq) SIM2; single-minded family bHLH transcription factor 2	--	[K]	Transcription	Single-minded protein C-terminus;; PAS fold;; PAS domain;; PAS fold;; Helix-loop-helix DNA-binding domain	Single-minded homolog 1-A GN=sim1a OS=Danio rerio (Zebrafish) PE=2 SV=1	K	Transcription	PREDICTED: single-minded homolog 2 isoform X1 [Gallus gallus]
gene17803	625	908	804	902	721	175	203	345	191	410	8.32639	10.5721	9.24128	10.4304	9.57865	2.48042	2.45002	4.53865	3.17216	5.46866	0.0170623	-1.09464	down	[IQR]	Lipid transport and metabolism;; Secondary metabolites biosynthesis, transport and catabolism;; General function prediction only	Cellular Component: cytoplasmic microtubule (GO:0005881);; Biological Process: xylulose metabolic process (GO:0005997);; Biological Process: glucose metabolic process (GO:0006006);; Molecular Function: oxidoreductase activity, acting on NAD(P)H, quinone or similar compound as acceptor (GO:0016655);; Biological Process: D-xylose metabolic process (GO:0042732);; Molecular Function: erythrulose redu…	K03331|1.21505e-178|gga:374066|K03331 L-xylulose reductase [EC:1.1.1.10] | (RefSeq) DCXR, DER, XR; dicarbonyl and L-xylulose reductase	Pentose and glucuronate interconversions (ko00040)	[Q]	Secondary metabolites biosynthesis, transport and catabolism	Enoyl-(Acyl carrier protein) reductase;; short chain dehydrogenase;; KR domain;; Shikimate / quinate 5-dehydrogenase	D-erythrulose reductase GN=DER OS=Gallus gallus (Chicken) PE=1 SV=1	Q	Secondary metabolites biosynthesis, transport and catabolism	D-erythrulose reductase [Gallus gallus]
gene17809	542	907	647	629	515	743	1352	1192	1510	1008	2.84528	4.31189	3.0503	2.59793	2.6234	4.65271	6.12843	6.20347	9.28998	5.27139	0.00119638	1.3684	up	--	--	Biological Process: GPI anchor release (GO:0006507);; Biological Process: neural tube patterning (GO:0021532);; Biological Process: negative regulation of canonical Wnt signaling pathway (GO:0090090);;	K19882|0|phi:102099415|K19882 O-palmitoleoyl-L-serine hydrolase [EC:3.1.1.98] | (RefSeq) NOTUM; NOTUM, palmitoleoyl-protein carboxylesterase	Wnt signaling pathway (ko04310)	[M]	Cell wall/membrane/envelope biogenesis	Pectinacetylesterase	--	M	Cell wall/membrane/envelope biogenesis	PREDICTED: protein notum homolog [Pseudopodoces humilis]
gene17820	77	137	58	84	99	29	26	12	11	22	0.598245	0.970454	0.4083	0.51463	0.748284	0.267913	0.174385	0.093034	0.093278	0.164196	0.0229155	-1.69432	down	--	--	Cellular Component: endosome (GO:0005768);; Cellular Component: cytosol (GO:0005829);; Biological Process: intracellular protein transport (GO:0006886);; Molecular Function: protein kinase activator activity (GO:0030295);;	--	--	[U]	Intracellular trafficking, secretion, and vesicular transport	VHS domain;; GAT domain	TOM1-like protein 2 GN=tom1l2 OS=Xenopus laevis (African clawed frog) PE=2 SV=1	U	Intracellular trafficking, secretion, and vesicular transport	PREDICTED: target of myb1-like 1 isoform X2 [Gallus gallus]
gene17889	360	411	381	312	220	906	1013	865	353	589	1.9339	1.9047	1.7381	1.53621	1.1106	5.37979	4.45314	4.38301	2.11492	3.06364	0.000449667	1.64717	up	[GEPR]	Carbohydrate transport and metabolism;; Amino acid transport and metabolism;; Inorganic ion transport and metabolism;; General function prediction only	--	K08183|0|gga:417435|K08183 MFS transporter, MCP family, solute carrier family 16 (monocarboxylic acid transporters), member 6 | (RefSeq) SLC16A6; solute carrier family 16 member 6	--	[G]	Carbohydrate transport and metabolism	Major Facilitator Superfamily;; Sugar (and other) transporter	Monocarboxylate transporter 12 GN=slc16a12 OS=Xenopus tropicalis (Western clawed frog) PE=2 SV=1	G	Carbohydrate transport and metabolism	PREDICTED: monocarboxylate transporter 7 isoform X3 [Gallus gallus]
gene17903	5938	7706	9395	13421	9352	2074	2017	1844	2514	1982	25.5613	29.0834	37.0453	44.6374	39.688	10.8495	7.68972	8.04619	13.2527	8.01448	2.10041e-08	-1.57903	down	--	--	Molecular Function: inward rectifier potassium channel activity (GO:0005242);; Biological Process: potassium ion transport (GO:0006813);; Biological Process: magnesium ion transport (GO:0015693);; Cellular Component: integral component of membrane (GO:0016021);; Biological Process: regulation of ion transmembrane transport (GO:0034765);; Molecular Function: identical protein binding (GO:0042802);…	K04996|0|mgp:100544982|K04996 potassium inwardly-rectifying channel subfamily J member 2 | (RefSeq) KCNJ2; potassium voltage-gated channel subfamily J member 2	--	[P]	Inorganic ion transport and metabolism	Inward rectifier potassium channel;; Inward rectifier potassium channel N-terminal	Inward rectifier potassium channel 2 GN=KCNJ2 OS=Gallus gallus (Chicken) PE=2 SV=1	P	Inorganic ion transport and metabolism	PREDICTED: inward rectifier potassium channel 2 [Meleagris gallopavo]
gene17915	524	655	432	861	613	108	245	133	114	186	5.70028	6.72983	4.28484	7.47944	6.54312	1.29273	2.32067	1.36916	1.46907	1.99096	0.00206464	-1.49538	down	--	--	Cellular Component: cytoplasm (GO:0005737);; Biological Process: Rho protein signal transduction (GO:0007266);; Biological Process: regulation of cell shape (GO:0008360);; Cellular Component: actin cytoskeleton (GO:0015629);; Cellular Component: microtubule cytoskeleton (GO:0015630);; Biological Process: positive regulation of pseudopodium assembly (GO:0031274);;	--	--	--	--	Cdc42 effector;; P21-Rho-binding domain	--	R	General function prediction only	PREDICTED: cdc42 effector protein 4 isoform X1 [Gallus gallus]
gene17928	1383	2321	1800	2712	1273	409	632	661	523	922	13.8612	19.5641	14.5507	20.0678	11.0314	5.02352	4.80206	5.74459	5.78966	7.92211	0.000814105	-1.0885	down	--	--	--	K10993|0|gga:100049617|K10993 fanconi anemia core complex 100 kDa subunit | (RefSeq) FAAP100, C17orf70, C18H17orf70; Fanconi anemia core complex associated protein 100	Fanconi anemia pathway (ko03460)	--	--	Fanconi anemia-associated	--	S	Function unknown	Fanconi anemia-associated protein of 100 kDa [Gallus gallus]
gene17961	15372	16988	17280	20721	13084	3571	5284	4943	4517	11174	356.278	148.996	356.315	368.697	287.807	44.4051	109.593	117.579	129.547	126.396	0.00502383	-1.03002	down	--	--	Molecular Function: integrin binding (GO:0005178);; Cellular Component: basement membrane (GO:0005604);; Molecular Function: enzyme activator activity (GO:0008047);; Molecular Function: metalloendopeptidase inhibitor activity (GO:0008191);; Biological Process: negative regulation of cell proliferation (GO:0008285);; Cellular Component: cell surface (GO:0009986);; Biological Process: regulation of…	--	--	[R]	General function prediction only	Tissue inhibitor of metalloproteinase	Metalloproteinase inhibitor 2 (Precursor) GN=TIMP2 OS=Gallus gallus (Chicken) PE=2 SV=1	R	General function prediction only	metalloproteinase inhibitor 2 precursor [Gallus gallus]
gene17966	794	1345	506	647	411	168	168	158	203	238	8.93306	13.8036	5.121	5.75864	4.52126	2.22938	1.63067	1.76608	2.68861	2.65053	0.0412182	-1.47551	down	--	--	Biological Process: regulation of protein phosphorylation (GO:0001932);; Biological Process: protein ubiquitination (GO:0016567);; Biological Process: intracellular signal transduction (GO:0035556);; Biological Process: regulation of growth (GO:0040008);; Biological Process: positive regulation of cell differentiation (GO:0045597);; Biological Process: negative regulation of insulin receptor sign…	K04696|2.9469e-134|gga:395299|K04696 suppressor of cytokine signaling 3 | (RefSeq) SOCS3, null; suppressor of cytokine signaling 3	Ubiquitin mediated proteolysis (ko04120);; Insulin signaling pathway (ko04910);; Adipocytokine signaling pathway (ko04920);; Influenza A (ko05164);; Herpes simplex infection (ko05168)	[T]	Signal transduction mechanisms	SH2 domain;; SOCS box	Suppressor of cytokine signaling 3 GN=SOCS3 OS=Gallus gallus (Chicken) PE=2 SV=1	T	Signal transduction mechanisms	suppressor of cytokine signaling 3 [Gallus gallus]
gene18008	13207	12161	11650	11916	10500	2567	2348	2978	2219	8456	124.933	104.853	99.1799	89.1157	97.0416	28.6153	19.2266	28.0208	24.7427	79.3017	0.000304695	-1.23747	down	[S]	Function unknown	--	K06248|0|gga:769665|K06248 chondroadherin | (RefSeq) CHAD; chondroadherin	Focal adhesion (ko04510);; ECM-receptor interaction (ko04512)	[R]	General function prediction only	Leucine rich repeat;; Leucine Rich repeats (2 copies);; Leucine Rich Repeat;; Leucine rich repeats (6 copies);; Leucine rich repeat N-terminal domain;; Leucine Rich repeat;; Leucine rich repeat	Leucine-rich repeat and immunoglobulin-like domain-containing nogo receptor-interacting protein 1 (Precursor) GN=lingo1 OS=Xenopus tropicalis (Western clawed frog) PE=2 SV=1	R	General function prediction only	PREDICTED: chondroadherin isoform X1 [Gallus gallus]
gene18057	162	125	175	93	199	386	147	473	288	355	1.29606	0.932626	1.15623	0.595331	1.65383	3.37279	1.02823	3.57986	2.60392	2.63568	0.00343764	1.64068	up	--	--	Biological Process: tRNA splicing, via endonucleolytic cleavage and ligation (GO:0006388);;	K15326|0|gga:422126|K15326 tRNA-splicing endonuclease subunit Sen54 | (RefSeq) TSEN54; tRNA splicing endonuclease subunit 54	--	[J]	Translation, ribosomal structure and biogenesis	tRNA-splicing endonuclease subunit sen54 N-term	--	J	Translation, ribosomal structure and biogenesis	PREDICTED: tRNA-splicing endonuclease subunit Sen54 isoform X2 [Gallus gallus]
gene18074	229	62	375	142	393	32346	44595	51255	36449	29177	5.14322	1.22372	7.7152	2.43983	8.55337	833.052	919.779	1113.06	939.291	655.004	1.62096e-70	7.82697	up	--	--	--	K10352|3.51082e-137|clv:102089597|K10352 myosin heavy chain | (RefSeq) myosin-8	Tight junction (ko04530)	[Z]	Cytoskeleton	Myosin tail	Myosin heavy chain, skeletal muscle, adult OS=Gallus gallus (Chicken) PE=1 SV=4	Z	Cytoskeleton	Myosin heavy chain, skeletal muscle, adult, partial [Columba livia]
gene18145	1120	1957	1525	1257	662	444	499	493	217	611	5.84579	9.47949	7.24197	5.26902	3.39751	2.72076	2.30762	2.57491	1.37419	3.14978	0.0309596	-1.03858	down	--	--	Cellular Component: Golgi apparatus (GO:0005794);; Biological Process: protein glycosylation (GO:0006486);; Cellular Component: integral component of membrane (GO:0016021);; Molecular Function: transferase activity, transferring glycosyl groups (GO:0016757);;	K00710|0|clv:102091331|K00710 polypeptide N-acetylgalactosaminyltransferase [EC:2.4.1.41] | (RefSeq) WBSCR17; Williams-Beuren syndrome chromosome region 17	Mucin type O-Glycan biosynthesis (ko00512)	[O]	Posttranslational modification, protein turnover, chaperones	Glycosyl transferase family 2;; Ricin-type beta-trefoil lectin domain;; Glycosyltransferase like family 2	Polypeptide N-acetylgalactosaminyltransferase 11 GN=galnt11 OS=Xenopus tropicalis (Western clawed frog) PE=1 SV=2	O	Posttranslational modification, protein turnover, chaperones	PREDICTED: Williams-Beuren syndrome chromosome region 17 isoform X2 [Gallus gallus]
gene18191	478	212	328	115	336	312	521	436	470	669	1.78525	0.694605	1.0846	0.337645	1.21067	1.36116	1.68962	1.62911	2.07956	2.42399	0.00914258	1.15821	up	--	--	--	--	--	--	--	Collagen triple helix repeat (20 copies);; EMI domain	--	W	Extracellular structures	PREDICTED: collagen alpha-1(XXVI) chain isoform X7 [Gallus gallus]
gene18226	430	479	432	863	469	115	196	110	188	260	4.53677	5.73492	4.87593	8.93429	6.04894	1.80294	1.73476	1.44381	2.82772	3.46913	0.0372274	-1.11125	down	[L]	Replication, recombination and repair	Molecular Function: DNA binding (GO:0003677);; Molecular Function: ATP binding (GO:0005524);; Biological Process: DNA metabolic process (GO:0006259);; Molecular Function: DNA-dependent ATPase activity (GO:0008094);;	K10871|0|gga:417528|K10871 RAD51-like protein 3 | (RefSeq) RAD51D, RAD51L3; RAD51 paralog D	Homologous recombination (ko03440)	[L]	Replication, recombination and repair	Rad51;; AAA domain;; DnaB-like helicase C terminal domain;; KaiC;; ATPase family associated with various cellular activities (AAA)	DNA repair protein RAD51 homolog 1 GN=RAD51A OS=Gallus gallus (Chicken) PE=2 SV=1	L	Replication, recombination and repair	DNA repair protein RAD51 homolog 4 [Gallus gallus]
gene18251	360	357	386	380	296	782	957	1273	572	715	6.21547	5.37329	5.756	4.96586	4.94608	14.9089	13.4512	20.632	10.8707	11.4204	1.59429e-06	1.77982	up	--	--	--	K05357|4.51392e-124|gga:408253|K05357 vitamin-K-epoxide reductase (warfarin-sensitive) [EC:1.17.4.4] | (RefSeq) VKORC1L1; vitamin K epoxide reductase complex subunit 1 like 1	Ubiquinone and other terpenoid-quinone biosynthesis (ko00130)	--	--	Vitamin K epoxide reductase family	--	S	Function unknown	vitamin K epoxide reductase complex subunit 1-like protein 1 [Gallus gallus]
gene18262	1258	1049	1231	1599	1135	314	523	370	268	524	6.5763	5.00452	5.79631	6.61069	5.79713	1.93422	2.36667	1.92413	1.64801	2.71573	0.00179822	-1.17016	down	--	--	--	--	--	--	--	--	--	S	Function unknown	PREDICTED: leucine-rich repeat-containing protein FAM211A [Gallus gallus]
gene18314	4246	3277	5102	4141	4582	6651	10109	7634	5611	5508	14.2405	10.0137	15.3988	10.9774	15.0161	26.3052	29.3702	25.4831	22.1861	18.3078	8.08684e-05	1.23371	up	[K]	Transcription	Molecular Function: RNA binding (GO:0003723);; Biological Process: regulation of transcription from RNA polymerase II promoter (GO:0006357);; Molecular Function: hydrolase activity, acting on ester bonds (GO:0016788);; Biological Process: regulation of DNA-templated transcription, elongation (GO:0032784);;	K11292|0|gga:425418|K11292 transcription elongation factor SPT6 | (RefSeq) SUPT6H; SPT6 homolog, histone chaperone	--	[A]	RNA processing and modification	SH2 domain;; Holliday-junction resolvase-like of SPT6;; Death-like domain of SPT6;; Helix-hairpin-helix motif;; Helix-turn-helix DNA-binding domain of SPT6;; Acidic N-terminal SPT6;; Tex-like protein N-terminal domain;; SH2 domain;; Helix-hairpin-helix motif;; S1 RNA binding domain	Transcription elongation factor SPT6 GN=supt6h OS=Danio rerio (Zebrafish) PE=1 SV=1	A	RNA processing and modification	PREDICTED: transcription elongation factor SPT6 [Gallus gallus]
gene18315	291	410	364	484	428	695	1099	1177	861	958	2.1745	2.90177	2.45495	2.87271	3.13837	6.14319	7.18653	8.84263	7.67875	7.23587	1.35761e-07	1.78413	up	--	--	Molecular Function: phospholipase A2 activity (GO:0004623);; Molecular Function: calcium ion binding (GO:0005509);; Cellular Component: extracellular region (GO:0005576);; Biological Process: phospholipid metabolic process (GO:0006644);; Biological Process: lipid catabolic process (GO:0016042);;	K01047|1.0495e-85|gga:100858782|K01047 secretory phospholipase A2 [EC:3.1.1.4] | (RefSeq) PROCA1; protein interacting with cyclin A1	Glycerophospholipid metabolism (ko00564);; Ether lipid metabolism (ko00565);; Arachidonic acid metabolism (ko00590);; Linoleic acid metabolism (ko00591);; alpha-Linolenic acid metabolism (ko00592);; Vascular smooth muscle contraction (ko04270)	--	--	Phospholipase A2	Phospholipase A2 isozymes PA3A/PA3B/PA5 OS=Heloderma suspectum (Gila monster) PE=1 SV=3	I	Lipid transport and metabolism	PREDICTED: protein PROCA1, partial [Meleagris gallopavo]
gene18368	138	356	135	159	137	404	1292	218	369	767	1.7312	4.21021	1.55619	1.50488	1.65644	7.5133	14.8111	3.21208	5.93168	9.90158	0.0193692	2.15935	up	[E]	Amino acid transport and metabolism	Molecular Function: hydrolase activity, acting on ester bonds (GO:0016788);; Molecular Function: hydrolase activity, acting on carbon-nitrogen (but not peptide) bonds, in linear amides (GO:0016811);;	K01437|0|gga:417609|K01437 aspartoacylase [EC:3.5.1.15] | (RefSeq) ASPA; aspartoacylase	Alanine, aspartate and glutamate metabolism (ko00250);; Histidine metabolism (ko00340)	--	--	Succinylglutamate desuccinylase / Aspartoacylase family	Aspartoacylase GN=aspa OS=Xenopus tropicalis (Western clawed frog) PE=2 SV=2	R	General function prediction only	PREDICTED: aspartoacylase isoform X4 [Gallus gallus]
gene18377	143	101	106	183	243	8	21	0	6	22	1.62406	1.05642	1.08862	1.5165	2.70701	0.077382	0.164986	0	0.055055	0.199712	1.43783e-06	-3.36607	down	[V]	Defense mechanisms	Biological Process: drug transmembrane transport (GO:0006855);; Molecular Function: drug transmembrane transporter activity (GO:0015238);; Molecular Function: antiporter activity (GO:0015297);; Cellular Component: membrane (GO:0016020);;	K03327|0|gga:417616|K03327 multidrug resistance protein, MATE family | (RefSeq) SLC47A2; solute carrier family 47 member 2	--	[R]	General function prediction only	MatE	Multidrug and toxin extrusion protein 1 GN=slc47a1 OS=Danio rerio (Zebrafish) PE=2 SV=1	P	Inorganic ion transport and metabolism	PREDICTED: multidrug and toxin extrusion protein 1-like isoform X2 [Meleagris gallopavo]
gene18419	200	261	244	146	130	0	0	0	0	0	1.40591	1.45377	1.6824	0.994993	0.789779	0	0	0	0	0	8.98363e-24	#NAME?	down	--	--	--	K10178|0|gga:373989|K10178 T-box protein 4 | (RefSeq) TBX4; T-box 4	--	[K]	Transcription	T-box	T-box transcription factor TBX5 GN=TBX5 OS=Gallus gallus (Chicken) PE=1 SV=1	K	Transcription	T-box transcription factor TBX4 [Gallus gallus]
gene18426	1635	1824	2017	1578	1798	2102	3948	2930	2166	1636	4.77661	4.78136	5.25831	3.62354	5.06883	7.20119	9.90743	8.46013	7.37387	4.69922	0.00439776	1.02932	up	--	--	Molecular Function: obsolete ubiquitin thiolesterase activity (GO:0004221);; Molecular Function: calcium ion binding (GO:0005509);; Biological Process: ubiquitin-dependent protein catabolic process (GO:0006511);; Molecular Function: cysteine-type peptidase activity (GO:0008234);;	K11837|0|gga:417646|K11837 ubiquitin carboxyl-terminal hydrolase 6/32 [EC:3.4.19.12] | (RefSeq) USP32, USP6; ubiquitin specific peptidase 32	--	[O]	Posttranslational modification, protein turnover, chaperones	Ubiquitin carboxyl-terminal hydrolase;; DUSP domain;; Ubiquitin carboxyl-terminal hydrolase;; EF hand;; EF hand;; EF-hand domain;; EF-hand domain pair;; Ubiquitin-like domain	Ubiquitin carboxyl-terminal hydrolase 15 GN=usp15 OS=Xenopus tropicalis (Western clawed frog) PE=2 SV=2	O	Posttranslational modification, protein turnover, chaperones	PREDICTED: ubiquitin carboxyl-terminal hydrolase 32 isoform X4 [Gallus gallus]
gene18454	2826	2010	2278	2267	1986	3619	5827	3313	2939	3057	6.17032	5.54878	4.92368	4.09545	4.15487	7.41243	7.30584	6.39756	7.67332	8.02707	6.48107e-05	1.21375	up	[R]	General function prediction only	Molecular Function: nucleotide binding (GO:0000166);; Molecular Function: nucleic acid binding (GO:0003676);; Cellular Component: intracellular ribonucleoprotein complex (GO:0030529);;	K14411|0|xtr:100038158|K14411 RNA-binding protein Musashi | (RefSeq) msi2, Msi2h, musashi-2, musashi2, xrp1; musashi RNA binding protein 2	mRNA surveillance pathway (ko03015)	[A]	RNA processing and modification	RNA recognition motif. (a.k.a. RRM, RBD, or RNP domain);; RNA recognition motif (a.k.a. RRM, RBD, or RNP domain);; RNA recognition motif. (a.k.a. RRM, RBD, or RNP domain)	Heterogeneous nuclear ribonucleoprotein D-like GN=hnrnpdl OS=Xenopus tropicalis (Western clawed frog) PE=2 SV=1	A	RNA processing and modification	PREDICTED: RNA-binding protein Musashi homolog 2 isoform X9 [Pelodiscus sinensis]
gene18477	479	399	591	371	814	969	1073	1191	1217	1955	3.88533	2.94941	4.32067	2.38151	6.45671	9.27859	7.54737	9.62415	11.6539	15.7431	6.76768e-09	1.73997	up	--	--	--	K16452|4.24967e-87|phi:102104655|K16452 coiled-coil domain-containing protein 92 | (RefSeq) coiled-coil domain-containing protein 92	--	--	--	Coiled-coil domain of unknown function	--	S	Function unknown	PREDICTED: coiled-coil domain-containing protein 92-like [Pseudopodoces humilis]
gene18478	308	257	428	613	158	60	121	23	100	44	1.33898	1.42829	1.70086	2.25591	1.05094	0.29877	0.90066	0.093712	0.526058	0.200047	0.00286561	-1.76954	down	--	--	Molecular Function: GTPase activator activity (GO:0005096);; Cellular Component: cytoplasm (GO:0005737);; Cellular Component: centrosome (GO:0005813);; Biological Process: regulation of small GTPase mediated signal transduction (GO:0051056);;	K17708|0|mgp:100547752|K17708 RAP1 GTPase activating protein 2 | (RefSeq) RAP1GAP2; RAP1 GTPase activating protein 2	--	[T]	Signal transduction mechanisms	Rap/ran-GAP	Rap1 GTPase-activating protein 2 GN=RAP1GAP2 OS=Gallus gallus (Chicken) PE=2 SV=2	T	Signal transduction mechanisms	PREDICTED: rap1 GTPase-activating protein 2, partial [Cuculus canorus]
gene18491	97030	50455	90115	117469	86009	20505	22024	18406	16294	19353	487.193	225.508	405.271	466.925	421.416	120.646	96.1125	90.4959	95.8925	93.9897	7.31635e-07	-1.67423	down	[Z]	Cytoskeleton	--	--	--	[R]	General function prediction only	Calponin homology (CH) domain;; CAMSAP CH domain	Cytospin-A GN=specc1l OS=Xenopus tropicalis (Western clawed frog) PE=2 SV=1	Z	Cytoskeleton	PREDICTED: smoothelin-like protein 2-like isoform X4 [Gallus gallus]
gene18563	71	102	11	0	0	104	129	109	71	85	0.341192	0.444989	0.044014	0	0	0.58519	0.536257	0.51845	0.400626	0.403667	0.0046808	1.8948	up	--	--	--	--	--	[S]	Function unknown	RNA pol II promoter Fmp27 protein domain;; Mitochondrial protein from FMP27;; Golgi-body localisation protein domain;; Mitochondrial protein from FMP27	--	S	Function unknown	PREDICTED: UPF0378 protein KIAA0100 homolog [Chaetura pelagica]
gene186	6333	14029	9127	8002	8067	1755	1936	862	971	1791	31.8775	64.2123	41.3872	31.8419	39.6346	10.3786	8.41738	4.35371	5.7386	9.04722	5.53205e-07	-2.14495	down	--	--	Biological Process: negative regulation of transcription from RNA polymerase II promoter (GO:0000122);; Biological Process: positive regulation of cell-matrix adhesion (GO:0001954);; Molecular Function: low-density lipoprotein receptor activity (GO:0005041);; Cellular Component: Golgi apparatus (GO:0005794);; Biological Process: phagocytosis, recognition (GO:0006910);; Biological Process: cell su…	K06259|0|gga:417730|K06259 CD36 antigen | (RefSeq) CD36; CD36 molecule	PPAR signaling pathway (ko03320);; Phagosome (ko04145);; ECM-receptor interaction (ko04512);; Adipocytokine signaling pathway (ko04920)	[T]	Signal transduction mechanisms	CD36 family	--	T	Signal transduction mechanisms	platelet glycoprotein 4 [Gallus gallus]
gene18633	6092	6682	7074	7114	5635	9123	10649	11786	9123	9752	82.9844	82.5202	85.8493	75.9986	72.1409	142.886	122.874	156.965	145.085	130.614	0.000781757	1.14713	up	[J]	Translation, ribosomal structure and biogenesis	Biological Process: in utero embryonic development (GO:0001701);; Biological Process: male germ cell proliferation (GO:0002176);; Molecular Function: translation initiation factor activity (GO:0003743);; Biological Process: translational initiation (GO:0006413);; Biological Process: male gonad development (GO:0008584);;	K03238|0|gga:395295|K03238 translation initiation factor 2 subunit 2 | (RefSeq) EIF2S2, EIF2B; eukaryotic translation initiation factor 2 subunit beta	RNA transport (ko03013)	[J]	Translation, ribosomal structure and biogenesis	Domain found in IF2B/IF5	--	J	Translation, ribosomal structure and biogenesis	eukaryotic translation initiation factor 2 subunit 2 [Gallus gallus]
gene18634	2050	2799	3816	2261	1551	3760	4378	7432	3440	6233	11.5412	17.6247	24.5521	11.4036	9.66504	26.5315	21.9803	51.7638	24.2716	44.6859	5.80296e-05	1.51947	up	--	--	--	K12895|1.96688e-143|fpg:101922924|K12895 heterogeneous nuclear ribonucleoprotein C-like 2 | (RefSeq) RALY; RALY heterogeneous nuclear ribonucleoprotein	--	[R]	General function prediction only	RNA recognition motif. (a.k.a. RRM, RBD, or RNP domain);; RNA recognition motif. (a.k.a. RRM, RBD, or RNP domain);; RNA recognition motif (a.k.a. RRM, RBD, or RNP domain)	RNA-binding Raly-like protein GN=ralyl OS=Xenopus tropicalis (Western clawed frog) PE=2 SV=1	A	RNA processing and modification	PREDICTED: RNA-binding protein Raly isoform X9 [Gallus gallus]
gene18691	226	168	298	190	129	454	831	560	575	302	0.946816	0.640321	1.12262	0.626586	0.525458	2.24278	3.01534	2.33236	2.84072	1.25131	1.77339e-05	1.95479	up	--	--	Cellular Component: cytoplasm (GO:0005737);;	--	--	--	--	EMI domain	--	R	General function prediction only	PREDICTED: EMILIN-3 [Gallus gallus]
gene18765	1933	1821	1480	2034	1471	3518	3918	3003	2857	2316	7.46271	6.40859	5.14312	6.20878	5.54819	16.019	13.1	11.538	13.006	8.86691	2.18495e-06	1.36235	up	--	--	--	K07189|0|gga:419220|K07189 protein phosphatase 1 regulatory subunit 3A/B/C/D/E | (RefSeq) PPP1R3D; protein phosphatase 1 regulatory subunit 3D	Insulin signaling pathway (ko04910)	[OT]	Posttranslational modification, protein turnover, chaperones;; Signal transduction mechanisms	Putative phosphatase regulatory subunit	Protein phosphatase 1 regulatory subunit 3C-B GN=ppp1r3cb OS=Danio rerio (Zebrafish) PE=2 SV=1	T	Signal transduction mechanisms	PREDICTED: protein phosphatase 1 regulatory subunit 3D [Gallus gallus]
gene18884	399	1131	758	832	465	222	294	236	176	289	5.08273	12.812	8.48899	8.46372	5.81459	3.36305	3.26322	2.99067	2.62317	3.69372	0.0334315	-1.04796	down	[R]	General function prediction only	--	K07847|3.39372e-169|gga:419274|K07847 Rad and Gem related GTP binding protein 1 | (RefSeq) REM1; RRAD and GEM like GTPase 1	--	[R]	General function prediction only	Ras family;; Miro-like protein;; Ferrous iron transport protein B	Ras-related protein O-RAL (Precursor) OS=Diplobatis ommata (Ocellated electric ray) PE=2 SV=1	R	General function prediction only	PREDICTED: GTP-binding protein REM 1 [Meleagris gallopavo]
gene18972	4682	5457	5447	6398	5065	7976	12166	10076	7544	8856	40.1833	42.6675	42.0901	43.4266	42.4709	80.7328	90.4167	86.0298	76.36	75.3622	5.7869e-05	1.29034	up	[E]	Amino acid transport and metabolism	Molecular Function: aminopeptidase activity (GO:0004177);; Cellular Component: cytoplasm (GO:0005737);; Biological Process: proteolysis (GO:0006508);; Molecular Function: metalloexopeptidase activity (GO:0008235);; Molecular Function: manganese ion binding (GO:0030145);;	K09611|0|gga:419314|K09611 probable aminopeptidase NPEPL1 [EC:3.4.11.-] | (RefSeq) NPEPL1; aminopeptidase-like 1	--	[R]	General function prediction only	Cytosol aminopeptidase family, catalytic domain	Cytosol aminopeptidase GN=lap3 OS=Xenopus tropicalis (Western clawed frog) PE=2 SV=1	R	General function prediction only	PREDICTED: probable aminopeptidase NPEPL1 isoform X6 [Gallus gallus]
gene1898	3233	4704	3061	4188	3289	4261	6870	6343	5980	5941	57.4091	76.1534	48.9287	58.8067	57.0681	89.2149	105.647	112.079	125.229	104.607	0.0001612	1.17939	up	--	--	--	--	--	--	--	Thyroid hormone-inducible hepatic protein Spot 14	Mid1-interacting protein 1-B {ECO:0000312|ZFIN:ZDB-GENE-040426-1720} OS=Danio rerio (Zebrafish) PE=2 SV=1	S	Function unknown	MID1 interacting protein 1 [Gallus gallus]
gene19182	809	750	1077	1338	1572	284	314	357	257	336	6.1019	5.35414	7.30478	8.38027	11.5521	2.43811	2.01662	2.57597	2.1556	2.15722	0.00114745	-1.33677	down	--	--	Cellular Component: intracellular (GO:0005622);; Molecular Function: zinc ion binding (GO:0008270);;	--	--	--	--	B-box zinc finger;; Zinc finger, C3HC4 type (RING finger);; FHA Ki67 binding domain of hNIFK	Zinc-binding protein A33 OS=Pleurodeles waltl (Iberian ribbed newt) PE=1 SV=2	O	Posttranslational modification, protein turnover, chaperones	PREDICTED: RING finger protein 207 isoform X4 [Gallus gallus]
gene19185	613	513	759	891	560	168	196	219	137	218	3.82546	2.85974	4.4411	4.62299	3.59	1.24772	1.09634	1.3646	1.02548	1.39781	0.00443432	-1.32011	down	[C]	Energy production and conversion	Molecular Function: voltage-gated potassium channel activity (GO:0005249);; Cellular Component: cytoplasm (GO:0005737);; Biological Process: potassium ion transport (GO:0006813);; Cellular Component: integral component of membrane (GO:0016021);; Biological Process: regulation of ion transmembrane transport (GO:0034765);;	K04883|0|pon:100173715|K04883 potassium voltage-gated channel Shaker-related subfamily A, beta member 2 | (RefSeq) KCNAB2; potassium voltage-gated channel subfamily A regulatory beta subunit 2	--	[C]	Energy production and conversion	Aldo/keto reductase family	Voltage-gated potassium channel subunit beta-2 GN=kcnab2 OS=Xenopus laevis (African clawed frog) PE=2 SV=1	P	Inorganic ion transport and metabolism	PREDICTED: voltage-gated potassium channel subunit beta-2 isoform X3 [Zonotrichia albicollis]
gene19194	140	64	160	136	83	181	345	128	157	210	0.835838	0.317039	0.852257	0.62953	0.436515	1.27316	1.78652	0.765611	1.11761	1.22682	0.0408417	1.29843	up	--	--	Biological Process: release of cytochrome c from mitochondria (GO:0001836);; Molecular Function: p53 binding (GO:0002039);; Molecular Function: transcription factor activity, sequence-specific DNA binding (GO:0003700);; Cellular Component: nucleus (GO:0005634);; Cellular Component: cytoplasm (GO:0005737);; Biological Process: inflammatory response (GO:0006954);; Biological Process: cellular respo…	K10148|0|gga:419382|K10148 tumor protein p73 | (RefSeq) TP73; tumor protein p73	p53 signaling pathway (ko04115)	--	--	P53 DNA-binding domain;; P53 tetramerisation motif;; SAM domain (Sterile alpha motif)	Cellular tumor antigen p53 GN=tp53 OS=Oncorhynchus mykiss (Rainbow trout) PE=2 SV=1	K	Transcription	PREDICTED: tumor protein p73 isoform X6 [Gallus gallus]
gene19287	641	788	1092	1338	1330	1347	2039	1638	1085	1504	3.59124	3.87766	5.51968	6.22246	7.25952	9.17574	9.82429	9.22502	7.15723	8.30689	0.000773165	1.05328	up	--	--	Molecular Function: G-protein coupled receptor activity (GO:0004930);; Cellular Component: integral component of membrane (GO:0016021);;	K08467|7.09885e-167|gga:419439|K08467 G protein-coupled receptor 157 | (RefSeq) GPR157; G protein-coupled receptor 157	--	--	--	7 transmembrane receptor (Secretin family);; Slime mold cyclic AMP receptor	--	T	Signal transduction mechanisms	PREDICTED: probable G-protein coupled receptor 157 isoform X21 [Gallus gallus]
gene19297	814	828	881	823	838	1489	1793	1493	1315	1189	5.59638	5.20983	5.46183	4.49287	5.65055	12.1096	10.6538	10.2379	10.703	8.07366	1.97388e-05	1.31303	up	--	--	--	K06210|0|gga:101748948|K06210 nicotinamide mononucleotide adenylyltransferase [EC:2.7.7.1 2.7.7.18] | (RefSeq) NMNAT1; nicotinamide nucleotide adenylyltransferase 1	Nicotinate and nicotinamide metabolism (ko00760)	[H]	Coenzyme transport and metabolism	Cytidylyltransferase	Nicotinamide mononucleotide adenylyltransferase 2 GN=nmnat2 OS=Xenopus tropicalis (Western clawed frog) PE=2 SV=1	H	Coenzyme transport and metabolism	PREDICTED: nicotinamide mononucleotide adenylyltransferase 1 [Gallus gallus]
gene19330	681	844	501	746	429	136	235	185	128	322	15.2355	16.5021	9.70081	12.3895	8.77416	3.6246	4.29649	4.08361	3.3865	7.13967	0.016932	-1.20692	down	--	--	--	--	--	--	--	Microfibril-associated glycoprotein (MAGP)	--	R	General function prediction only	PREDICTED: microfibrillar-associated protein 2 isoform X1 [Gallus gallus]
gene19344	4550	2907	4843	6081	3660	1324	905	1418	1108	2921	45.1058	28.4184	46.845	51.2552	38.3666	16.3821	8.51108	14.8517	14.0502	30.8458	0.00327381	-1.0312	down	--	--	Cellular Component: extracellular region (GO:0005576);; Molecular Function: morphogen activity (GO:0016015);; Biological Process: sequestering of BMP in extracellular matrix (GO:0035582);; Molecular Function: BMP binding (GO:0036122);; Biological Process: positive regulation of neuron differentiation (GO:0045666);; Biological Process: determination of dorsal identity (GO:0048263);; Biological Pro…	K19558|3.79496e-114|gga:373952|K19558 neuroblastoma suppressor of tumorigenicity 1 | (RefSeq) NBL1, MINOS1-NBL1; neuroblastoma 1, DAN family BMP antagonist	TGF-beta signaling pathway (ko04350)	--	--	DAN domain;; Cystine-knot domain	Neuroblastoma suppressor of tumorigenicity 1 (Precursor) GN=NBL1 OS=Gallus gallus (Chicken) PE=2 SV=2	R	General function prediction only	PREDICTED: neuroblastoma suppressor of tumorigenicity 1 [Meleagris gallopavo]
gene19363	2362	2092	2242	2153	1813	3729	6564	3092	2532	2676	10.9984	8.67385	9.27208	7.70931	8.25957	20.481	26.3288	13.7396	13.7691	12.0034	0.00617894	1.29175	up	[O]	Posttranslational modification, protein turnover, chaperones	Cellular Component: integral component of membrane (GO:0016021);; Biological Process: cell redox homeostasis (GO:0045454);;	K09536|0|gga:429208|K09536 DnaJ homolog subfamily C member 16 | (RefSeq) DNAJC16; DnaJ heat shock protein family (Hsp40) member C16	--	--	--	DnaJ domain;; Thioredoxin	DnaJ homolog subfamily C member 16 (Precursor) GN=DNAJC16 OS=Gallus gallus (Chicken) PE=2 SV=1	O	Posttranslational modification, protein turnover, chaperones	dnaJ homolog subfamily C member 16 precursor [Gallus gallus]
gene19390	14405	4375	14234	11592	12641	23484	14824	26566	10509	19175	53.8971	14.8699	47.8805	34.3408	46.1634	102.976	48.6883	98.5934	46.6986	70.9987	0.0206558	1.2291	up	--	--	Biological Process: blastocyst formation (GO:0001825);; Molecular Function: GTPase activity (GO:0003924);; Molecular Function: GTP binding (GO:0005525);; Cellular Component: mitochondrial outer membrane (GO:0005741);; Biological Process: obsolete GTP catabolic process (GO:0006184);; Biological Process: protein targeting to mitochondrion (GO:0006626);; Biological Process: mitochondrial membrane or…	K06030|0|mgp:100542450|K06030 mitofusin [EC:3.6.5.-] | (RefSeq) MFN2; mitofusin 2	--	[O]	Posttranslational modification, protein turnover, chaperones	fzo-like conserved region;; Dynamin family;; 50S ribosome-binding GTPase	--	O	Posttranslational modification, protein turnover, chaperones	PREDICTED: mitofusin-2 isoform X9 [Gallus gallus]
gene19410	106	159	262	222	149	1011	773	347	213	648	0.445303	0.607063	1.20446	0.832098	0.612323	5.48236	2.8184	1.45165	1.05363	2.70452	0.0165687	2.2636	up	--	--	--	--	--	--	--	Beta-lactamase	--	S	Function unknown	PREDICTED: putative beta-lactamase-like 1-like isoform X1 [Gallus gallus]
gene19414	1269	979	2176	1659	1126	562	733	265	133	836	2.73685	1.7659	4.27104	2.61115	2.49187	1.31199	1.26176	1.4343	0.852237	1.41877	0.0415248	-1.05075	down	[RTKL]	General function prediction only;; Signal transduction mechanisms;; Transcription;; Replication, recombination and repair	Biological Process: angiogenesis (GO:0001525);; Molecular Function: transmembrane-ephrin receptor activity (GO:0005005);; Molecular Function: receptor binding (GO:0005102);; Molecular Function: ATP binding (GO:0005524);; Cellular Component: integral component of plasma membrane (GO:0005887);; Biological Process: axonal fasciculation (GO:0007413);; Biological Process: learning (GO:0007612);; Molec…	K05111|0|gga:396513|K05111 Eph receptor B2 [EC:2.7.10.1] | (RefSeq) EPHB2; EPH receptor B2	--	[T]	Signal transduction mechanisms	Protein tyrosine kinase;; Ephrin receptor ligand binding domain;; Protein kinase domain;; Fibronectin type III domain;; Ephrin type-A receptor 2 transmembrane domain;; SAM domain (Sterile alpha motif);; SAM domain (Sterile alpha motif);; GCC2 and GCC3	Ephrin type-B receptor 2 (Precursor) GN=EPHB2 OS=Gallus gallus (Chicken) PE=1 SV=3	T	Signal transduction mechanisms	RecName: Full=Ephrin type-B receptor 2; AltName: Full=EPH-like kinase 5; Short=EK5; Short=cEK5; Flags: Precursor [Gallus gallus]
gene19450	548	95	204	82	179	7	8	0	7	5	1.26824	0.170465	0.396049	0.144827	0.432223	0.014387	0.012327	0	0.014356	0.01712	0.0120101	-4.88004	down	[Z]	Cytoskeleton	--	--	--	--	--	Kinesin motor domain	Kinesin-like protein kif7 GN=kif7 OS=Danio rerio (Zebrafish) PE=1 SV=1	Z	Cytoskeleton	PREDICTED: LOW QUALITY PROTEIN: kinesin family member 17 [Gallus gallus]
gene1950	1625	1158	1192	1545	3567	140	253	303	120	522	10.8972	4.56596	8.45603	8.42798	19.1421	1.69551	1.92981	1.37689	0.909981	3.99796	0.0270605	-2.36522	down	[K]	Transcription	Biological Process: neuron migration (GO:0001764);; Molecular Function: chromatin binding (GO:0003682);; Molecular Function: transcription factor activity, sequence-specific DNA binding (GO:0003700);; Cellular Component: nucleus (GO:0005634);; Biological Process: regulation of transcription, DNA-templated (GO:0006355);; Biological Process: axon guidance (GO:0007411);; Biological Process: globus p…	K09452|1.63011e-84|lcm:102355503|K09452 homeobox protein aristaless-related | (RefSeq) ARX; aristaless related homeobox	--	[R]	General function prediction only	Homeobox domain;; OAR domain	Aristaless-related homeobox protein GN=arx OS=Danio rerio (Zebrafish) PE=2 SV=1	K	Transcription	PREDICTED: aristaless-related homeobox protein-like [Latimeria chalumnae]
gene19539	1262	2029	2249	2035	1456	357	688	658	274	739	8.77418	12.859	14.0787	11.1864	9.88965	2.92746	4.14314	4.55297	2.24166	5.09139	0.00013467	-1.26039	down	--	--	Molecular Function: receptor activity (GO:0004872);; Cellular Component: plasma membrane (GO:0005886);; Cellular Component: anchored component of membrane (GO:0031225);;	--	--	--	--	GDNF/GAS1 domain	GDNF family receptor alpha-2 (Precursor) GN=GFRA2 OS=Gallus gallus (Chicken) PE=2 SV=1	T	Signal transduction mechanisms	GDNF family receptor alpha-2 precursor [Gallus gallus]
gene19548	2170	2758	3061	3926	3019	346	561	345	209	1143	29.2683	33.2335	36.2431	41.7033	38.8018	5.36295	6.38236	4.5053	3.23952	14.9075	2.92348e-13	-2.08469	down	[T]	Signal transduction mechanisms	Molecular Function: protein tyrosine phosphatase activity (GO:0004725);; Cellular Component: mitochondrion (GO:0005739);; Molecular Function: protein tyrosine/serine/threonine phosphatase activity (GO:0008138);; Biological Process: peptidyl-tyrosine dephosphorylation (GO:0035335);;	K14165|4.87976e-157|apla:101804841|K14165 atypical dual specificity phosphatase [EC:3.1.3.16 3.1.3.48] | (RefSeq) DUSP26; dual specificity phosphatase 26	--	[V]	Defense mechanisms	Dual specificity phosphatase, catalytic domain	Dual specificity phosphatase DUPD1 GN=DUPD1 OS=Anolis carolinensis (Green anole) PE=3 SV=1	V	Defense mechanisms	PREDICTED: LOW QUALITY PROTEIN: dual specificity protein phosphatase 26 [Cuculus canorus]
gene19557	1661	1067	2136	2071	1678	204	350	291	236	411	3.99483	4.94897	4.62304	3.93984	3.94759	1.76893	2.03181	1.5054	0.701031	1.0023	8.43621e-11	-2.04533	down	--	--	Cellular Component: histone deacetylase complex (GO:0000118);; Molecular Function: nucleic acid binding (GO:0003676);; Cellular Component: cytoplasm (GO:0005737);; Biological Process: positive regulation of cell proliferation (GO:0008284);; Biological Process: regulation of transforming growth factor beta receptor signaling pathway (GO:0017015);; Biological Process: cell differentiation (GO:00301…	--	--	--	--	NocA-like zinc-finger protein 1	Zinc finger protein 703 GN=znf703 OS=Xenopus tropicalis (Western clawed frog) PE=2 SV=1	K	Transcription	PREDICTED: zinc finger protein 703 [Pseudopodoces humilis]
gene19728	8097	11043	7365	10052	13840	3659	3722	3184	2373	5199	411.049	510.981	336.518	403.447	686.477	218.977	163.58	160.798	141.995	261.63	0.0105042	-1.00226	down	--	--	Molecular Function: transporter activity (GO:0005215);; Biological Process: transport (GO:0006810);; Molecular Function: cytoskeletal protein binding (GO:0008092);; Molecular Function: lipid binding (GO:0008289);;	K08752|6.29642e-90|gga:419557|K08752 fatty acid-binding protein 3, muscle and heart | (RefSeq) FABP3, FABP, H-FABP; fatty acid binding protein 3	PPAR signaling pathway (ko03320)	[I]	Lipid transport and metabolism	Lipocalin / cytosolic fatty-acid binding protein family;; Lipocalin / cytosolic fatty-acid binding protein family	Fatty acid-binding protein, heart GN=fabp3 OS=Oncorhynchus mykiss (Rainbow trout) PE=2 SV=3	I	Lipid transport and metabolism	heart fatty acid binding protein [Gallus gallus]
gene1974	5118	3623	3809	8840	5770	221	460	251	489	1505	74.9569	46.5641	48.0346	107.674	78.3591	3.54861	3.93179	2.17988	5.88237	20.3401	3.88645e-08	-2.77417	down	--	--	Cellular Component: nucleus (GO:0005634);; Cellular Component: muscle tendon junction (GO:0005927);; Cellular Component: M band (GO:0031430);; Cellular Component: costamere (GO:0043034);;	--	--	--	--	Stretch-responsive small skeletal muscle X protein, Chisel	--	S	Function unknown	PREDICTED: small muscular protein [Struthio camelus australis]
gene19792	2324	2384	2008	2130	1536	651	642	604	489	1336	11.4089	10.4596	8.67972	8.09714	7.26252	3.76698	2.67879	2.89872	2.78626	6.36053	0.00254353	-1.011	down	[U]	Intracellular trafficking, secretion, and vesicular transport	--	K12488|0|fch:102058189|K12488 Arf-GAP with SH3 domain, ANK repeat and PH domain-containing protein | (RefSeq) ASAP3; ArfGAP with SH3 domain, ankyrin repeat and PH domain 3	Endocytosis (ko04144)	[T]	Signal transduction mechanisms	Putative GTPase activating protein for Arf;; PH domain;; Ankyrin repeats (3 copies);; Ankyrin repeat;; Variant SH3 domain;; Variant SH3 domain;; Ankyrin repeats (many copies);; Ankyrin repeats (many copies);; Ankyrin repeat	Arf-GAP with coiled-coil, ANK repeat and PH domain-containing protein 2 GN=ACAP2 OS=Gallus gallus (Chicken) PE=2 SV=1	T	Signal transduction mechanisms	PREDICTED: arf-GAP with SH3 domain, ANK repeat and PH domain-containing protein 3, partial [Meleagris gallopavo]
gene19803	3062	534	481	948	3440	3923	4121	3901	3329	3797	44.1121	6.99534	6.22112	10.7814	48.4287	66.6378	51.4037	55.9204	56.5399	54.2344	1.74784e-05	1.6123	up	--	--	--	--	--	--	--	Mitochondrial fission regulator	Mitochondrial fission regulator 1-like-A GN=mtfr1l-a OS=Xenopus laevis (African clawed frog) PE=2 SV=1	S	Function unknown	PREDICTED: family with sequence similarity 54, member B isoform X4 [Gallus gallus]
gene19809	339	195	215	165	488	498	667	471	188	847	2.63107	1.80304	1.95369	0.962168	3.51634	4.51933	5.05282	3.67626	1.13612	7.40386	0.00835824	1.33634	up	--	--	Molecular Function: ammonium transmembrane transporter activity (GO:0008519);; Cellular Component: integral component of membrane (GO:0016021);;	K06579|0|gga:395121|K06579 Rhesus blood group glycoprotein | (RefSeq) RHCE, RHD; Rh blood group CcEe antigens	--	[UR]	Intracellular trafficking, secretion, and vesicular transport;; General function prediction only	Ammonium Transporter Family	Ammonium transporter Rh type B GN=rhbg OS=Danio rerio (Zebrafish) PE=2 SV=1	P	Inorganic ion transport and metabolism	Rh blood group D antigen [Gallus gallus]
gene19848	5571	7106	17186	19328	11524	1540	2563	1982	1901	2151	50.8882	59.3323	140.776	139.326	102.537	16.8593	20.5567	18.306	20.7903	19.9738	0.000534488	-2.04757	down	--	--	Cellular Component: stress fiber (GO:0001725);; Molecular Function: actin binding (GO:0003779);; Cellular Component: nucleus (GO:0005634);; Molecular Function: zinc ion binding (GO:0008270);; Cellular Component: Z disc (GO:0030018);; Biological Process: actin cytoskeleton organization (GO:0030036);;	--	--	[TZR]	Signal transduction mechanisms;; Cytoskeleton;; General function prediction only	LIM domain	PDZ and LIM domain protein 7 GN=pdlim7 OS=Danio rerio (Zebrafish) PE=2 SV=1	TZ	Signal transduction mechanisms;; Cytoskeleton	PREDICTED: four and a half LIM domains protein 3 isoform X3 [Gallus gallus]
gene1985	1839	2306	2235	2030	1737	4402	6834	4693	2949	6717	11.5197	12.8673	12.7456	11.7043	10.5462	37.1739	42.8592	30.365	23.6482	47.2396	3.36212e-11	1.80705	up	--	--	Biological Process: cytoskeleton organization (GO:0007010);; Biological Process: regulation of cell shape (GO:0008360);; Biological Process: cell migration (GO:0016477);;	K12470|0|gga:418608|K12470 SH3 domain-containing kinase-binding protein 1 | (RefSeq) SH3KBP1; SH3 domain containing kinase binding protein 1	Endocytosis (ko04144)	[T]	Signal transduction mechanisms	Variant SH3 domain;; Variant SH3 domain;; SH3 domain;; SH3 domain;; Variant SH3 domain;; Variant SH3 domain	Intersectin-1 GN=itsn1 OS=Xenopus laevis (African clawed frog) PE=1 SV=1	T	Signal transduction mechanisms	PREDICTED: SH3 domain-containing kinase-binding protein 1 isoform X1 [Corvus cornix cornix]
gene19864	1184	1449	1236	1814	1483	2649	3353	2337	1707	2031	5.43857	6.06697	5.10769	6.58672	6.65565	14.3484	13.3356	10.6819	9.24376	9.24898	1.03306e-05	1.26352	up	--	--	--	K18668|0|gga:419618|K18668 ribonuclease ZC3H12 [EC:3.1.-.-] | (RefSeq) ZC3H12A; zinc finger CCCH-type containing 12A	--	[S]	Function unknown	Zc3h12a-like Ribonuclease NYN domain	NEDD4-binding protein 1 GN=n4bp1 OS=Xenopus laevis (African clawed frog) PE=2 SV=1	S	Function unknown	PREDICTED: ribonuclease ZC3H12A [Gallus gallus]
gene19876	885	742	932	528	416	161	108	123	117	187	3.62601	2.77038	3.43552	1.70854	1.66383	0.777607	0.381983	0.500213	0.565314	0.757594	2.69558e-05	-1.82345	down	--	--	--	--	--	--	--	Collagen triple helix repeat (20 copies);; C1q domain	Collagen alpha-1(X) chain (Precursor) GN=COL10A1 OS=Gallus gallus (Chicken) PE=1 SV=4	W	Extracellular structures	PREDICTED: collagen alpha-2(VIII) chain [Gallus gallus]
gene19896	705	565	588	1373	781	302	165	161	301	451	20.392	14.8737	15.3273	31.4641	22.0968	10.249	4.09594	4.59477	10.2435	12.9127	0.0389175	-1.00237	down	--	--	--	--	--	--	--	DoxX-like family;; DoxX	--	R	General function prediction only	PREDICTED: uncharacterized protein LOC100857984 isoform X1 [Gallus gallus]
gene19943	418	429	551	638	483	117	169	164	89	201	1.88541	1.76833	2.2367	2.33617	2.13892	0.613355	0.671347	0.701077	0.46903	0.894468	0.018202	-1.2835	down	--	--	--	--	--	--	--	NHS-like	Uncharacterized protein KIAA1522 homolog GN=si:ch211-194e15.5 OS=Danio rerio (Zebrafish) PE=4 SV=1	S	Function unknown	PREDICTED: uncharacterized protein KIAA1522 isoform X4 [Gallus gallus]
gene20041	864	485	836	590	833	268	81	239	85	293	2.53258	1.82146	2.42236	1.54559	2.96287	1.19562	0.192656	0.973228	0.270335	0.796708	0.00150811	-1.41304	down	--	--	--	--	--	--	--	--	--	--	--	--
gene20048	274	694	137	213	185	1119	1830	1793	2151	3526	8.46853	19.5679	3.79492	5.19622	5.59207	40.8483	49.0649	55.2318	78.5306	111.518	2.01375e-10	3.26253	up	--	--	Molecular Function: calmodulin binding (GO:0005516);;	--	--	--	--	IQ calmodulin-binding motif	Neurogranin GN=NRGN OS=Serinus canaria (Island canary) PE=3 SV=1	T	Signal transduction mechanisms	putative neurogranin [Taeniopygia guttata]
gene20078	190	440	477	388	442	51	32	162	60	121	3.0513	5.19416	4.7321	4.9322	5.29817	1.15123	0.548971	1.36045	1.14133	1.32955	0.00258272	-1.68399	down	--	--	Biological Process: negative regulation of transcription from RNA polymerase II promoter (GO:0000122);; Molecular Function: transcription regulatory region sequence-specific DNA binding (GO:0000976);; Biological Process: cartilage condensation (GO:0001502);; Molecular Function: chromatin binding (GO:0003682);; Molecular Function: transcription factor activity, sequence-specific DNA binding (GO:00…	K09361|2.00471e-156|gga:395714|K09361 BarH-like homeobox | (RefSeq) BARX2, BARX2B; BARX homeobox 2	--	[R]	General function prediction only	Homeobox domain	Homeobox protein BarH-like 1 GN=barx1 OS=Danio rerio (Zebrafish) PE=2 SV=2	K	Transcription	homeobox protein BarH-like 2 [Gallus gallus]
gene20089	4269	3773	4425	4856	3440	1084	1369	1423	917	1969	17.3823	14.0014	16.216	15.6332	13.6842	5.20229	4.82489	5.76295	4.39931	7.94823	0.000146703	-1.13546	down	--	--	Molecular Function: metalloendopeptidase activity (GO:0004222);; Cellular Component: proteinaceous extracellular matrix (GO:0005578);; Biological Process: proteolysis (GO:0006508);; Molecular Function: zinc ion binding (GO:0008270);;	K08629|0|gga:419733|K08629 a disintegrin and metalloproteinase with thrombospondin motifs 15 [EC:3.4.24.-] | (RefSeq) ADAMTS15; ADAM metallopeptidase with thrombospondin type 1 motif, 15	--	[O]	Posttranslational modification, protein turnover, chaperones	ADAM-TS Spacer 1;; Reprolysin family propeptide;; Reprolysin (M12B) family zinc metalloprotease;; Thrombospondin type 1 domain;; Metallo-peptidase family M12;; Metallo-peptidase family M12B Reprolysin-like;; Metallo-peptidase family M12B Reprolysin-like	Disintegrin acugrin (Precursor) OS=Deinagkistrodon acutus (Hundred-pace snake) PE=1 SV=1	O	Posttranslational modification, protein turnover, chaperones	PREDICTED: A disintegrin and metalloproteinase with thrombospondin motifs 15 [Gallus gallus]
gene20145	179	78	286	180	214	29	6	26	41	52	1.5532	0.728117	2.29862	1.2191	1.86788	0.301218	0.070857	0.227322	0.404187	0.627067	0.00119638	-2.07141	down	--	--	--	--	--	[H]	Coenzyme transport and metabolism	CUB domain;; Fz domain;; Low-density lipoprotein receptor domain class A;; CUB-like domain	Bone morphogenetic protein 1 (Precursor) GN=bmp1 OS=Xenopus laevis (African clawed frog) PE=1 SV=1	HT	Coenzyme transport and metabolism;; Signal transduction mechanisms	PREDICTED: membrane frizzled-related protein isoform X1 [Gallus gallus]
gene20146	720	1439	887	1156	690	177	282	344	188	645	10.2322	18.6439	11.3535	12.9929	9.57842	2.96154	3.47021	4.86169	3.1448	9.09189	0.0186648	-1.12243	down	--	--	Cellular Component: collagen trimer (GO:0005581);;	--	--	--	--	C1q domain;; Collagen triple helix repeat (20 copies)	Otolin-1 (Precursor) GN=otol1 OS=Oncorhynchus keta (Chum salmon) PE=1 SV=1	W	Extracellular structures	PREDICTED: complement C1q tumor necrosis factor-related protein 5 isoform X1 [Gallus gallus]
gene20177	2197	1443	1570	1525	2188	537	649	521	468	603	11.6586	6.89313	7.43936	6.3728	11.3453	3.30773	2.96484	2.74046	2.9084	3.15315	0.000483405	-1.2026	down	--	--	--	K06781|0|gga:419762|K06781 cell adhesion molecule 1 | (RefSeq) CADM1, IGSF4, Necl-2, RA175, SgIGSF, SynCAM1, TSLC1; cell adhesion molecule 1	Cell adhesion molecules (CAMs) (ko04514)	--	--	Immunoglobulin domain;; Immunoglobulin I-set domain;; Immunoglobulin V-set domain;; Immunoglobulin domain;; Immunoglobulin domain;; CD80-like C2-set immunoglobulin domain	Cell adhesion molecule 2 (Precursor) GN=cadm2 OS=Xenopus tropicalis (Western clawed frog) PE=2 SV=1	T	Signal transduction mechanisms	PREDICTED: cell adhesion molecule 1 isoform X1 [Meleagris gallopavo]
gene20192	2834	6492	3392	7163	2754	1187	1625	1556	1104	2065	47.5336	99.4572	51.185	95.1972	45.2446	23.4468	23.6081	26.0054	21.8272	34.3822	0.0461315	-1.07416	down	--	--	Cellular Component: cytoplasm (GO:0005737);; Biological Process: muscle organ development (GO:0007517);;	K20526|3.06022e-144|mgp:100548009|K20526 transgelin | (RefSeq) TAGLN; transgelin	--	[Z]	Cytoskeleton	Calponin family repeat;; Calponin homology (CH) domain	Transgelin GN=TAGLN OS=Gallus gallus (Chicken) PE=1 SV=3	Z	Cytoskeleton	transgelin [Gallus gallus]
gene202	1969	2955	1921	3713	911	552	750	882	387	907	20.1011	28.3592	16.0652	27.6606	8.94817	6.63612	5.42934	8.81573	4.55915	9.52164	0.0277362	-1.2135	down	--	--	Cellular Component: extracellular space (GO:0005615);; Biological Process: negative regulation of osteoclast differentiation (GO:0045671);; Biological Process: bone marrow development (GO:0048539);;	--	--	[R]	General function prediction only	Leucine rich repeat;; Leucine Rich repeats (2 copies);; Leucine rich repeats (6 copies);; Leucine Rich Repeat;; Leucine-rich repeat;; Leucine Rich repeat	Leucine-rich repeat-containing protein 3 (Precursor) GN=lrrc3 OS=Danio rerio (Zebrafish) PE=2 SV=1	R	General function prediction only	leucine-rich repeat-containing protein 17 precursor [Gallus gallus]
gene20230	7524	6857	6812	3347	7248	19488	26269	25749	17907	18428	63.5607	54.5343	53.4861	22.5376	61.1568	171.955	200.34	246.709	186.997	162.37	5.64458e-13	2.24285	up	[G]	Carbohydrate transport and metabolism	Molecular Function: transporter activity (GO:0005215);; Cellular Component: integral component of membrane (GO:0016021);; Biological Process: transmembrane transport (GO:0055085);;	K08171|0|gga:419789|K08171 MFS transporter, OPA family, solute carrier family 37 (glycerol-6-phosphate transporter), member 4 | (RefSeq) SLC37A4; solute carrier family 37 member 4	--	[G]	Carbohydrate transport and metabolism	Major Facilitator Superfamily	Sugar phosphate exchanger 2 GN=slc37a2 OS=Xenopus tropicalis (Western clawed frog) PE=2 SV=1	G	Carbohydrate transport and metabolism	PREDICTED: glucose-6-phosphate translocase isoform 2 [Gallus gallus]
gene20242	939	884	1313	1535	1096	266	267	351	393	456	4.71145	3.74368	6.30388	6.06248	5.89413	1.6871	1.06202	1.55459	2.22054	2.28024	0.000987398	-1.20567	down	--	--	Biological Process: MAPK cascade (GO:0000165);; Biological Process: angiogenesis (GO:0001525);; Molecular Function: cytokine activity (GO:0005125);; Cellular Component: extracellular space (GO:0005615);; Biological Process: inflammatory response (GO:0006954);; Biological Process: positive regulation of gene expression (GO:0010628);; Biological Process: regulation of cell adhesion (GO:0030155);; B…	K05482|6.68977e-132|gga:395312|K05482 interleukin 18 | (RefSeq) IL18, ChIL-18, IL-18, interleukin-18; interleukin 18	Cytokine-cytokine receptor interaction (ko04060);; NOD-like receptor signaling pathway (ko04621);; Cytosolic DNA-sensing pathway (ko04623);; Salmonella infection (ko05132);; Influenza A (ko05164)	--	--	Interleukin-1 / 18	Interleukin-18 (Precursor) GN=IL18 OS=Gallus gallus (Chicken) PE=2 SV=1	T	Signal transduction mechanisms	interleukin-18 [Gallus gallus]
gene20545	3240	4911	3058	4389	2123	1014	894	1128	776	2488	51.6949	73.4323	45.0788	56.637	33.879	19.0642	12.3375	18.0187	15.0575	40.447	0.0248607	-1.01636	down	--	--	--	K01371|0|apla:101794155|K01371 cathepsin K [EC:3.4.22.38] | (RefSeq) CTSK; cathepsin K	Lysosome (ko04142);; Apoptosis (ko04210);; Toll-like receptor signaling pathway (ko04620)	[O]	Posttranslational modification, protein turnover, chaperones	Papain family cysteine protease;; Cathepsin propeptide inhibitor domain (I29);; Peptidase C1-like family	Cathepsin K (Precursor) GN=CTSK OS=Gallus gallus (Chicken) PE=2 SV=1	O	Posttranslational modification, protein turnover, chaperones	PREDICTED: cathepsin K [Leptosomus discolor]
gene20684	2129	1857	1749	3534	1521	4462	8490	5021	5895	4715	10.7669	9.45911	10.0272	13.4237	8.6303	23.1444	31.1908	29.0769	29.9792	22.7474	5.19263e-09	1.93448	up	[Z]	Cytoskeleton	Molecular Function: GTPase activity (GO:0003924);; Molecular Function: structural constituent of cytoskeleton (GO:0005200);; Molecular Function: GTP binding (GO:0005525);; Cellular Component: cytoplasm (GO:0005737);; Cellular Component: microtubule (GO:0005874);; Biological Process: obsolete GTP catabolic process (GO:0006184);; Biological Process: microtubule-based process (GO:0007017);; Biologic…	K07374|0|apla:101797289|K07374 tubulin alpha | (RefSeq) TUBA1C; tubulin alpha-8 chain	Phagosome (ko04145);; Apoptosis (ko04210);; Gap junction (ko04540)	[Z]	Cytoskeleton	Tubulin/FtsZ family, GTPase domain;; Tubulin C-terminal domain	Tubulin alpha chain GN=tuba OS=Xenopus laevis (African clawed frog) PE=2 SV=2	Z	Cytoskeleton	PREDICTED: tubulin alpha-1C chain-like isoform X1 [Anas platyrhynchos]
gene20700	0	7	0	0	3	89	254	71	163	205	0	0.044497	0	0	0.008334	0.765832	1.635	0.490727	0.850403	0.863852	9.26576e-17	6.72176	up	--	--	Molecular Function: lamin binding (GO:0005521);; Biological Process: intermediate filament bundle assembly (GO:0045110);;	K10387|0|apla:101798848|K10387 plakophilin 1 | (RefSeq) PKP1; plakophilin 1	--	[TW]	Signal transduction mechanisms;; Extracellular structures	Armadillo/beta-catenin-like repeat;; HEAT repeats;; HEAT-like repeat	Catenin delta-1 GN=ctnnd1 OS=Xenopus laevis (African clawed frog) PE=1 SV=1	TW	Signal transduction mechanisms;; Extracellular structures	PREDICTED: plakophilin-1 isoform X4 [Gallus gallus]
gene20701	46	13	6	22	11	53920	97582	74298	63732	62644	0.099175	0.025101	0.011749	0.039844	0.02328	167.223	233.288	195.041	209.494	170.1	2.24958e-156	12.2786	up	--	--	--	--	--	[Z]	Cytoskeleton	Immunoglobulin I-set domain;; Fibronectin type III domain;; Immunoglobulin domain;; Immunoglobulin V-set domain;; Immunoglobulin domain;; Immunoglobulin domain;; Natural killer cell receptor 2B4;; Tissue factor;; CD80-like C2-set immunoglobulin domain	Myosin-binding protein C, fast-type GN=MYBPC2 OS=Gallus gallus (Chicken) PE=1 SV=3	T	Signal transduction mechanisms	PREDICTED: immunoglobulin-like and fibronectin type III domain containing 1 isoform X1 [Gallus gallus]
gene20702	32	51	20	40	14	115	179	75	149	147	0.339576	0.493825	0.191844	0.340715	0.145536	1.45541	1.65396	0.795362	1.88936	1.57909	3.98573e-05	2.6029	up	--	--	Cellular Component: lysosome (GO:0005764);; Cellular Component: integral component of membrane (GO:0016021);;	--	--	[S]	Function unknown	TMEM9	Putative protein 2 (Fragment) OS=Takifugu rubripes (Japanese pufferfish) PE=3 SV=1	S	Function unknown	PREDICTED: transmembrane protein 9 isoform X2 [Gallus gallus]
gene20704	2464	2920	2426	2485	2230	4187	6106	4778	4222	5919	34.603	37.2159	30.5726	27.3446	30.5022	69.0696	74.0845	66.5097	69.7428	82.2456	1.29375e-07	1.49952	up	--	--	--	--	--	--	--	--	--	S	Function unknown	transmembrane protein 183 [Gallus gallus]
gene20708	13913	33361	21485	11911	11811	41820	55571	70354	38019	38807	132.372	289.317	183.989	89.6006	109.793	469.107	457.786	665.971	426.496	366.058	5.50809e-07	1.91208	up	--	--	Biological Process: cell adhesion (GO:0007155);; Cellular Component: myosin filament (GO:0032982);;	--	--	--	--	Immunoglobulin I-set domain;; Fibronectin type III domain;; Immunoglobulin domain;; Immunoglobulin domain;; Immunoglobulin domain;; Tissue factor;; CD80-like C2-set immunoglobulin domain;; Immunoglobulin V-set domain;; Alphaherpesvirus glycoprotein I	Myosin-binding protein H GN=MYBPH OS=Gallus gallus (Chicken) PE=1 SV=1	Z	Cytoskeleton	myosin-binding protein H [Gallus gallus]
gene20726	53	54	49	124	46	5	14	23	14	14	0.11553	0.106343	0.095163	0.214913	0.098782	0.010526	0.026008	0.04879	0.034311	0.030054	0.0214928	-1.68778	down	--	--	--	K04601|0|fab:101809280|K04601 cadherin EGF LAG seven-pass G-type receptor 2 | (RefSeq) CELSR2; cadherin EGF LAG seven-pass G-type receptor 2	--	[T]	Signal transduction mechanisms	Cadherin domain;; Domain of unknown function (DUF3497);; Laminin G domain;; 7 transmembrane receptor (Secretin family);; Laminin G domain;; EGF-like domain;; Latrophilin/CL-1-like GPS domain;; Laminin EGF-like (Domains III and V);; Cadherin prodomain like	Protocadherin-15 (Precursor) GN=Pcdh15 OS=Gallus gallus (Chicken) PE=1 SV=1	T	Signal transduction mechanisms	PREDICTED: cadherin EGF LAG seven-pass G-type receptor 2 [Ficedula albicollis]
gene20767	173	360	339	518	227	1351	3640	1492	1573	1584	2.25192	4.39093	4.05029	5.4499	2.89384	21.1869	42.2114	19.674	24.5976	20.8323	2.80332e-07	3.09044	up	--	--	Molecular Function: cyclin-dependent protein serine/threonine kinase inhibitor activity (GO:0004861);; Cellular Component: nucleus (GO:0005634);; Biological Process: cell cycle arrest (GO:0007050);;	K06625|7.1496e-85|gga:378914|K06625 cyclin-dependent kinase inhibitor 1A | (RefSeq) CDKN1A, CIP1; cyclin dependent kinase inhibitor 1A	ErbB signaling pathway (ko04012);; FoxO signaling pathway (ko04068);; Cell cycle (ko04110);; p53 signaling pathway (ko04115)	[T]	Signal transduction mechanisms	Cyclin-dependent kinase inhibitor	--	T	Signal transduction mechanisms	cyclin-dependent kinase inhibitor 1A [Gallus gallus]
gene2078	946	764	1204	1183	1019	388	117	386	337	516	1.10899	0.955365	1.57425	1.3756	1.60952	0.732057	0.493794	0.832437	0.581096	1.06657	0.00902102	-1.02097	down	[P]	Inorganic ion transport and metabolism	Molecular Function: sulfuric ester hydrolase activity (GO:0008484);;	K01131|0|gga:418654|K01131 steryl-sulfatase [EC:3.1.6.2] | (RefSeq) STS, steryl-sulfatase; steroid sulfatase (microsomal), isozyme S	Steroid hormone biosynthesis (ko00140)	[R]	General function prediction only	Sulfatase;; C-terminal region of aryl-sulfatase;; Type I phosphodiesterase / nucleotide pyrophosphatase	Arylsulfatase K (Precursor) GN=arsk OS=Xenopus laevis (African clawed frog) PE=2 SV=1	R	General function prediction only	PREDICTED: steryl-sulfatase isoform X18 [Gallus gallus]
gene208	1749	2271	2008	1592	1834	3334	4119	2799	2095	1801	5.63335	6.93698	5.85213	4.02478	5.7381	13.1305	11.0009	9.30094	8.23705	4.78701	0.00719117	1.09081	up	[P]	Inorganic ion transport and metabolism	Biological Process: sensory perception of sound (GO:0007605);; Molecular Function: secondary active sulfate transmembrane transporter activity (GO:0008271);; Biological Process: sulfate transport (GO:0008272);; Cellular Component: integral component of membrane (GO:0016021);; Cellular Component: basolateral plasma membrane (GO:0016323);; Cellular Component: lateral plasma membrane (GO:0016328);; …	K14703|0|gga:417715|K14703 solute carrier family 26, member 5 | (RefSeq) SLC26A5; solute carrier family 26 member 5	--	[P]	Inorganic ion transport and metabolism	Sulfate transporter family;; Sulfate transporter N-terminal domain with GLY motif;; STAS domain	Solute carrier family 26 member 9 GN=slc26a9 OS=Xenopus tropicalis (Western clawed frog) PE=2 SV=1	P	Inorganic ion transport and metabolism	PREDICTED: prestin [Meleagris gallopavo]
gene20822	1490	1865	1983	1762	1351	7509	10399	8285	5248	6498	4.66221	5.37721	5.69805	4.41282	4.20513	28.0962	28.685	26.184	19.6345	20.4215	3.23262e-21	2.67294	up	[RTKL]	General function prediction only;; Signal transduction mechanisms;; Transcription;; Replication, recombination and repair	Molecular Function: magnesium ion binding (GO:0000287);; Molecular Function: protein serine/threonine kinase activity (GO:0004674);; Molecular Function: ATP binding (GO:0005524);; Cellular Component: nucleus (GO:0005634);; Biological Process: erythrocyte differentiation (GO:0030218);;	K18669|0|mgp:100548368|K18669 dual specificity tyrosine-phosphorylation-regulated kinase 2/3/4 [EC:2.7.12.1] | (RefSeq) DYRK3; dual specificity tyrosine phosphorylation regulated kinase 3	--	[R]	General function prediction only	Protein kinase domain;; Protein tyrosine kinase;; Phosphotransferase enzyme family	Dual specificity tyrosine-phosphorylation-regulated kinase 2 OS=Gallus gallus (Chicken) PE=2 SV=1	T	Signal transduction mechanisms	PREDICTED: dual specificity tyrosine-phosphorylation-regulated kinase 3 isoform 2 [Gallus gallus]
gene20846	2923	7576	6255	6620	6249	755	1968	2138	1250	1898	85.3403	201.616	164.354	152.805	178.256	25.9637	49.7315	62.0774	43.0214	54.9241	0.000150262	-1.40192	down	--	--	Cellular Component: mitochondrion (GO:0005739);; Biological Process: positive regulation of apoptotic process (GO:0043065);;	--	--	--	--	G0/G1 switch protein 2	--	T	Signal transduction mechanisms	G0/G1 switch protein 2 [Lonchura striata]
gene20851	145	64	105	230	107	241	130	198	251	317	2.36412	0.942959	1.54403	2.97351	1.71057	4.64909	1.8319	3.20894	4.83761	5.12976	0.0352291	1.35281	up	--	--	--	--	--	--	--	Domain of unknown function (DUF4504)	UPF0739 protein C1orf74 homolog GN=TEgg073c16.1 OS=Xenopus tropicalis (Western clawed frog) PE=2 SV=1	S	Function unknown	PREDICTED: UPF0739 protein C1orf74 homolog [Gallus gallus]
gene20872	552	1139	614	1088	493	166	307	181	248	287	9.40711	20.8941	10.4026	14.6965	9.36228	4.35579	4.7629	4.20812	6.35795	5.11104	0.00820857	-1.19189	down	[R]	General function prediction only	Biological Process: cytokinesis (GO:0000910);; Molecular Function: signal transducer activity (GO:0004871);; Molecular Function: GTP binding (GO:0005525);; Cellular Component: nucleus (GO:0005634);; Cellular Component: plasma membrane (GO:0005886);; Biological Process: small GTPase mediated signal transduction (GO:0007264);; Cellular Component: cleavage furrow (GO:0032154);; Biological Process: p…	K07857|6.35419e-141|clv:102085109|K07857 Ras homolog gene family, member C | (RefSeq) RHOC; ras homolog family member C	--	[R]	General function prediction only	Ras family;; Miro-like protein;; ADP-ribosylation factor family;; Elongation factor Tu GTP binding domain	Rho-related GTP-binding protein RhoC (Precursor) GN=RHOC OS=Gallus gallus (Chicken) PE=1 SV=1	T	Signal transduction mechanisms	PREDICTED: rho-related GTP-binding protein RhoC isoform X1 [Columba livia]
gene20873	2363	3095	2928	3380	3197	601	578	738	973	613	16.9883	20.4478	18.7769	18.6323	22.214	5.05725	3.48421	5.20512	7.99091	4.23671	9.021e-09	-1.54425	down	--	--	--	K17504|0|gga:419873|K17504 protein phosphatase 1J [EC:3.1.3.16] | (RefSeq) PPM1J; protein phosphatase, Mg2+/Mn2+ dependent 1J	--	[T]	Signal transduction mechanisms	Protein phosphatase 2C;; Stage II sporulation protein E (SpoIIE)	Protein phosphatase 1H GN=ppm1h OS=Xenopus tropicalis (Western clawed frog) PE=2 SV=1	T	Signal transduction mechanisms	PREDICTED: protein phosphatase 1J [Gallus gallus]
gene20890	2606	3484	3224	3718	2316	3510	6317	4030	3589	4334	11.5725	14.6877	12.8234	13.294	10.0829	18.0256	23.7532	16.7494	18.8106	18.1517	0.00116227	1.00861	up	--	--	--	K20161|0|gga:100858235|K20161 DENN domain-containing protein 2 | (RefSeq) DENND2C; DENN domain containing 2C	--	[T]	Signal transduction mechanisms	DENN (AEX-3) domain;; uDENN domain;; dDENN domain	DENN domain-containing protein 1A GN=dennd1a OS=Xenopus laevis (African clawed frog) PE=2 SV=1	T	Signal transduction mechanisms	DENN domain-containing protein 2C [Gallus gallus]
gene20891	14710	15596	18805	17170	14699	32804	33592	40968	35109	28297	115.701	117.48	132.238	111.005	116.003	315.794	227.679	334.953	334.34	216.99	2.93988e-06	1.61028	up	[F]	Nucleotide transport and metabolism	Molecular Function: AMP deaminase activity (GO:0003876);; Biological Process: IMP salvage (GO:0032264);;	K01490|0|gga:772125|K01490 AMP deaminase [EC:3.5.4.6] | (RefSeq) AMPD1; adenosine monophosphate deaminase 1	Purine metabolism (ko00230)	[F]	Nucleotide transport and metabolism	Adenosine/AMP deaminase	AMP deaminase 1 (Fragment) GN=AMPD1 OS=Gallus gallus (Chicken) PE=1 SV=1	F	Nucleotide transport and metabolism	PREDICTED: AMP deaminase 1 isoform X1 [Gallus gallus]
gene20894	3319	3585	3912	4199	3007	4767	5071	5139	5291	5447	32.3919	31.891	34.3642	32.3974	28.6721	54.8501	42.8467	49.8934	60.8818	52.7069	0.00147872	1.03988	up	--	--	Biological Process: activation of innate immune response (GO:0002218);; Cellular Component: focal adhesion (GO:0005925);; Cellular Component: intracellular membrane-bounded organelle (GO:0043231);;	K12656|8.04747e-111|gga:419887|K12656 suppressor of IKK-epsilon | (RefSeq) SIKE1, SIKE; suppressor of IKBKE 1	RIG-I-like receptor signaling pathway (ko04622)	--	--	Protein of unknown function (DUF837)	Suppressor of IKBKE 1 GN=sike1 OS=Xenopus tropicalis (Western clawed frog) PE=2 SV=1	S	Function unknown	suppressor of IKBKE 1 [Gallus gallus]
gene20915	3986	1133	3832	3302	2705	4326	5702	5093	3930	3470	9.47417	2.61874	8.225	6.12411	6.00779	12.288	12.8704	11.8359	11.7435	7.91694	0.000384682	1.10218	up	--	--	Molecular Function: identical protein binding (GO:0042802);; Molecular Function: histone deacetylase binding (GO:0042826);;	--	--	[S]	Function unknown	N-terminal region of Chorein, a TM vesicle-mediated sorter	UHRF1-binding protein 1-like GN=uhrf1bp1l OS=Xenopus laevis (African clawed frog) PE=2 SV=1	S	Function unknown	PREDICTED: UHRF1-binding protein 1 isoform X4 [Gallus gallus]
gene20919	18	26	3	6	14	54	92	74	78	103	0.130926	0.169627	0.013519	0.029688	0.09539	0.459877	0.583732	0.535406	0.67129	0.745253	2.90044e-06	3.0284	up	--	--	--	K20123|0|gga:419903|K20123 protein kinase C and casein kinase substrate in neurons protein | (RefSeq) PACSIN1; protein kinase C and casein kinase substrate in neurons 1	--	[TUZ]	Signal transduction mechanisms;; Intracellular trafficking, secretion, and vesicular transport;; Cytoskeleton	Fes/CIP4, and EFC/F-BAR homology domain;; Variant SH3 domain;; SH3 domain;; Variant SH3 domain	Protein kinase C and casein kinase substrate in neurons protein 1 GN=pacsin1b OS=Danio rerio (Zebrafish) PE=1 SV=1	Z	Cytoskeleton	PREDICTED: protein kinase C and casein kinase substrate in neurons protein 1 isoform X2 [Gallus gallus]
gene20921	2804	2496	4044	4213	4567	6241	10513	7355	4513	7429	7.78526	6.2697	9.97212	9.02118	12.1725	19.8586	24.0864	19.4757	14.4392	19.6412	5.76665e-07	1.47439	up	--	--	Molecular Function: magnesium ion binding (GO:0000287);; Molecular Function: diphosphoinositol-polyphosphate diphosphatase activity (GO:0008486);; Biological Process: diphosphoinositol polyphosphate catabolic process (GO:0071544);;	K07766|3.58572e-101|gga:419905|K07766 diphosphoinositol-polyphosphate diphosphatase [EC:3.6.1.52] | (RefSeq) NUDT3; nudix hydrolase 3	--	[T]	Signal transduction mechanisms	NUDIX domain	--	L	Replication, recombination and repair	diphosphoinositol polyphosphate phosphohydrolase 1 [Gallus gallus]
gene20951	560	924	1625	1447	1346	3006	2216	1625	3002	1699	2.86588	5.01573	8.69082	6.93715	7.87185	20.3062	10.4029	8.68016	19.876	9.33539	0.0143596	1.54805	up	--	--	Biological Process: embryonic placenta development (GO:0001892);; Molecular Function: DNA binding (GO:0003677);; Cellular Component: transcription factor complex (GO:0005667);; Cellular Component: cytoplasm (GO:0005737);; Biological Process: humoral immune response (GO:0006959);; Biological Process: lysosome organization (GO:0007040);; Biological Process: positive regulation of autophagy (GO:0010…	K15590|0|gga:419922|K15590 transcription factor EB | (RefSeq) TFEB; transcription factor EB	--	[K]	Transcription	Domain of unknown function (DUF3371);; Helix-loop-helix DNA-binding domain	Transcription factor EC GN=TFEC OS=Gallus gallus (Chicken) PE=2 SV=1	K	Transcription	transcription factor EB [Gallus gallus]
gene20962	1170	1249	1371	1440	1372	2279	2869	2656	1983	2078	11.0554	10.9013	11.1774	10.9474	12.7196	25.3562	23.3103	24.4643	21.3481	19.2095	1.66559e-06	1.35684	up	--	--	Cellular Component: cyclin-dependent protein kinase holoenzyme complex (GO:0000307);; Molecular Function: cyclin-dependent protein serine/threonine kinase activity (GO:0004693);; Cellular Component: nucleus (GO:0005634);; Biological Process: signal transduction (GO:0007165);; Molecular Function: protein kinase binding (GO:0019901);; Biological Process: T cell proliferation (GO:0042098);; Biologic…	K10152|1.19422e-146|gga:419928|K10152 cyclin D3 | (RefSeq) CCND3; cyclin D3	Cell cycle (ko04110);; p53 signaling pathway (ko04115);; Wnt signaling pathway (ko04310);; Focal adhesion (ko04510)	[D]	Cell cycle control, cell division, chromosome partitioning	Cyclin, N-terminal domain;; Cyclin, C-terminal domain	G1/S-specific cyclin-D2 GN=CCND2 OS=Gallus gallus (Chicken) PE=3 SV=1	D	Cell cycle control, cell division, chromosome partitioning	PREDICTED: G1/S-specific cyclin-D3 isoform X1 [Meleagris gallopavo]
gene20985	0	0	0	0	0	684	1259	778	977	551	0	0	0	0	0	19.04	26.9188	20.8627	24.7333	14.477	1.81325e-49	Inf	up	--	--	--	--	--	[Z]	Cytoskeleton	Fibronectin type III domain;; Immunoglobulin I-set domain	M-protein, striated muscle OS=Gallus gallus (Chicken) PE=2 SV=1	T	Signal transduction mechanisms	PREDICTED: immunoglobulin-like and fibronectin type III domain containing 1 isoform X4 [Gallus gallus]
gene20988	0	0	0	3	0	3409	5723	4914	3937	3185	0	0	0	0.016441	0	63.244	78.7268	76.4834	73.4115	49.3924	5.96014e-118	13.4739	up	--	--	--	--	--	--	--	Immunoglobulin I-set domain;; Immunoglobulin domain	Myosin-binding protein C, fast-type GN=MYBPC2 OS=Gallus gallus (Chicken) PE=1 SV=3	T	Signal transduction mechanisms	PREDICTED: immunoglobulin-like and fibronectin type III domain containing 1 isoform X1 [Gallus gallus]
gene20997	2348	4183	4163	4367	2832	6983	7518	8773	7652	7475	29.4316	53.1892	52.3672	48.175	38.6099	115.019	90.9512	121.872	126.03	103.641	9.01849e-08	1.64088	up	[F]	Nucleotide transport and metabolism	Molecular Function: AMP deaminase activity (GO:0003876);; Biological Process: IMP salvage (GO:0032264);;	K01490|0|gga:772125|K01490 AMP deaminase [EC:3.5.4.6] | (RefSeq) AMPD1; adenosine monophosphate deaminase 1	Purine metabolism (ko00230)	[F]	Nucleotide transport and metabolism	Adenosine/AMP deaminase	AMP deaminase 1 (Fragment) GN=AMPD1 OS=Gallus gallus (Chicken) PE=1 SV=1	F	Nucleotide transport and metabolism	PREDICTED: AMP deaminase 1 isoform X3 [Gallus gallus]
gene21150	258	351	336	729	314	61	116	107	108	196	2.86025	3.54564	3.3505	6.40129	3.39262	0.795683	1.11408	1.21269	1.40242	2.1532	0.0347613	-1.25051	down	--	--	Cellular Component: membrane (GO:0016020);;	--	--	--	--	Uncharacterised protein family UPF0560	Protein FAM171A2 (Precursor) GN=fam171a2 OS=Xenopus laevis (African clawed frog) PE=2 SV=1	S	Function unknown	PREDICTED: protein FAM171A2 [Alligator mississippiensis]
gene21157	459	671	663	802	498	115	171	201	127	273	4.05493	5.14109	6.4616	4.99989	5.32984	1.57603	1.37628	2.18463	2.03438	3.28458	0.00779425	-1.31292	down	--	--	Molecular Function: nucleotide binding (GO:0000166);; Molecular Function: DNA binding (GO:0003677);; Molecular Function: RNA binding (GO:0003723);; Cellular Component: nucleolus (GO:0005730);; Cellular Component: cytoplasm (GO:0005737);; Biological Process: DNA repair (GO:0006281);; Biological Process: DNA recombination (GO:0006310);;	K10874|0|gga:395228|K10874 RAD52 motif-containing protein 1 | (RefSeq) RDM1, RAD52B; RAD52 motif containing 1	--	--	--	Rad52/22 family double-strand break repair protein;; RNA recognition motif. (a.k.a. RRM, RBD, or RNP domain);; RNA recognition motif. (a.k.a. RRM, RBD, or RNP domain)	RAD52 motif-containing protein 1 GN=RDM1 OS=Gallus gallus (Chicken) PE=1 SV=1	R	General function prediction only	RAD52 motif-containing protein 1 [Gallus gallus]
gene21172	448	587	456	899	306	176	169	253	114	195	2.62296	3.15042	2.41594	4.17579	1.75283	1.22152	0.853927	1.47817	0.783943	1.13523	0.0482275	-1.03987	down	--	--	Molecular Function: receptor activity (GO:0004872);; Molecular Function: integrin binding (GO:0005178);; Biological Process: cell-substrate junction assembly (GO:0007044);; Biological Process: cell-matrix adhesion (GO:0007160);; Biological Process: integrin-mediated signaling pathway (GO:0007229);; Molecular Function: zinc ion binding (GO:0008270);; Cellular Component: integrin complex (GO:000830…	K06493|0|gga:374209|K06493 integrin beta 3 | (RefSeq) ITGB3, integrin; integrin subunit beta 3	Phagosome (ko04145);; Focal adhesion (ko04510);; ECM-receptor interaction (ko04512);; Regulation of actin cytoskeleton (ko04810)	[TW]	Signal transduction mechanisms;; Extracellular structures	Integrin, beta chain;; Integrin beta cytoplasmic domain;; Integrin beta tail domain;; EGF-like domain	Integrin beta-1 (Precursor) GN=ITGB1 OS=Gallus gallus (Chicken) PE=1 SV=1	W	Extracellular structures	integrin beta-3 precursor [Gallus gallus]
gene21200	1409	1168	1595	1576	1702	285	383	225	288	544	28.6108	21.4964	29.1727	25.188	33.6934	6.76818	6.69164	5.02146	6.85358	10.92	9.19786e-07	-1.63605	down	[T]	Signal transduction mechanisms	Molecular Function: pyruvate dehydrogenase (acetyl-transferring) kinase activity (GO:0004740);; Molecular Function: ATP binding (GO:0005524);; Cellular Component: nucleus (GO:0005634);; Cellular Component: mitochondrial pyruvate dehydrogenase complex (GO:0005967);; Biological Process: regulation of gluconeogenesis (GO:0006111);; Biological Process: regulation of pH (GO:0006885);; Biological Proce…	K00898|0|phi:102105276|K00898 pyruvate dehydrogenase kinase 2/3/4 [EC:2.7.11.2] | (RefSeq) PDK2; pyruvate dehydrogenase kinase 2	--	[T]	Signal transduction mechanisms	Mitochondrial branched-chain alpha-ketoacid dehydrogenase kinase;; Histidine kinase-, DNA gyrase B-, and HSP90-like ATPase	--	T	Signal transduction mechanisms	PREDICTED: [Pyruvate dehydrogenase [lipoamide]] kinase isozyme 2, mitochondrial [Pseudopodoces humilis]
gene21237	497	1299	827	803	617	0	29	3	9	7	3.26297	7.66178	4.99139	3.71617	3.87911	0	0.161928	0.015785	0.060782	0.039295	4.31726e-20	-5.96386	down	--	--	--	K09294|2.02636e-168|fpg:101916253|K09294 homeobox protein HoxA/B/C/D9 | (RefSeq) HOXB9; homeobox B9	--	[K]	Transcription	Hox9 activation region;; Homeobox domain	Homeobox protein Hox-B9a GN=hoxb9a OS=Danio rerio (Zebrafish) PE=2 SV=2	K	Transcription	PREDICTED: homeobox protein Hox-B9 [Falco peregrinus]
gene21407	1026	1534	1822	1754	910	275	330	364	237	594	4.55748	6.04879	6.99101	6.11327	4.3894	1.41219	1.33223	1.69066	1.23118	2.55545	1.63949e-05	-1.47556	down	--	--	Biological Process: protein localization to paranode region of axon (GO:0002175);; Biological Process: cytoskeleton organization (GO:0007010);; Biological Process: cell adhesion (GO:0007155);; Cellular Component: voltage-gated potassium channel complex (GO:0008076);; Biological Process: axo-dendritic transport (GO:0008088);; Biological Process: paranodal junction assembly (GO:0030913);; Cellular …	K07379|0|gga:428309|K07379 contactin associated protein 1 | (RefSeq) CNTNAP1; contactin associated protein 1	Cell adhesion molecules (CAMs) (ko04514)	[T]	Signal transduction mechanisms	Laminin G domain;; Laminin G domain;; F5/8 type C domain;; Concanavalin A-like lectin/glucanases superfamily;; EGF-like domain;; Fibrinogen beta and gamma chains, C-terminal globular domain	Contactin-associated protein-like 5 (Precursor) GN=CNTNAP5 OS=Gallus gallus (Chicken) PE=2 SV=1	T	Signal transduction mechanisms	PREDICTED: contactin-associated protein 1, partial [Gallus gallus]
gene2150	7916	9501	8217	6951	6260	11838	14471	11393	8448	9051	36.4106	39.8322	34.0158	25.2778	28.1318	64.1926	57.6297	52.1324	45.8142	41.2696	0.00414874	1.0138	up	[J]	Translation, ribosomal structure and biogenesis	Molecular Function: GTPase activity (GO:0003924);; Molecular Function: GTP binding (GO:0005525);;	K03243|0|gga:395514|K03243 translation initiation factor 5B | (RefSeq) EIF5B, CIF2; eukaryotic translation initiation factor 5B	RNA transport (ko03013)	[J]	Translation, ribosomal structure and biogenesis	Elongation factor Tu GTP binding domain;; Translation-initiation factor 2;; Elongation factor Tu domain 2;; Elongation factor Tu domain 4;; 50S ribosome-binding GTPase	116 kDa U5 small nuclear ribonucleoprotein component GN=EFTUD2 OS=Gallus gallus (Chicken) PE=2 SV=1	J	Translation, ribosomal structure and biogenesis	eukaryotic translation initiation factor 5B [Gallus gallus]
gene21609	4376	6702	4054	6074	3277	6803	6335	8032	7893	6511	79.9451	111.609	66.6603	87.7356	58.4891	146.535	100.208	145.996	170.027	117.937	0.00177582	1.08418	up	[F]	Nucleotide transport and metabolism	Cellular Component: intracellular (GO:0005622);; Biological Process: negative regulation of myoblast differentiation (GO:0045662);;	K10524|5.10496e-133|tgu:100231927|K10524 nicotinamide/nicotinate riboside kinase [EC:2.7.1.22 2.7.1.173] | (RefSeq) NMRK2; nicotinamide riboside kinase 2	Nicotinate and nicotinamide metabolism (ko00760)	[F]	Nucleotide transport and metabolism	AAA domain	--	F	Nucleotide transport and metabolism	PREDICTED: nicotinamide riboside kinase 2 [Meleagris gallopavo]
gene21611	257	1382	737	48	925	49	27	19	110	13	0.815133	3.82897	2.19795	0.126925	3.1573	0.173271	0.07103	0.059563	0.423543	0.038837	0.0200708	-3.32753	down	--	--	--	K18450|0|gga:420094|K18450 caytaxin | (RefSeq) ATCAY; ATCAY, caytaxin	--	--	--	Bcl2-/adenovirus E1B nineteen kDa-interacting protein 2;; Divergent CRAL/TRIO domain;; CRAL/TRIO domain	Protein prune homolog 2 GN=Prune2 OS=Xenopus tropicalis (Western clawed frog) PE=2 SV=1	T	Signal transduction mechanisms	PREDICTED: caytaxin isoform X3 [Gallus gallus]
gene21676	124	104	454	116	574	17	9	24	9	14	1.57021	1.15015	4.89211	1.14845	6.42869	0.217724	0.067483	0.216683	0.099608	0.166443	0.0245195	-3.7381	down	--	--	--	--	--	--	--	Perilipin family	--	R	General function prediction only	PREDICTED: collagen alpha-2(I) chain isoform X13 [Gallus gallus]
gene21795	3128	3364	4652	3472	1931	22453	30718	27581	17871	18265	10.6356	10.2283	13.7935	9.18053	6.1414	88.4208	88.8538	91.6843	70.3798	60.4535	2.57412e-26	3.34199	up	--	--	Cellular Component: cytosol (GO:0005829);; Molecular Function: protein C-terminus binding (GO:0008022);; Cellular Component: postsynaptic density of dendrite (GO:0014069);; Molecular Function: protein domain specific binding (GO:0019904);; Cellular Component: basal part of cell (GO:0045178);;	K15010|0|gga:420115|K15010 homer | (RefSeq) HOMER3; homer scaffolding protein 3	FoxO signaling pathway (ko04068)	--	--	WH1 domain	--	T	Signal transduction mechanisms	PREDICTED: homer protein homolog 3 isoformX1 [Gallus gallus]
gene21806	151	223	133	182	150	35	26	41	20	61	1.31962	1.78113	1.03201	1.24306	1.26461	0.352114	0.206305	0.346859	0.204405	0.550227	0.0143596	-1.71881	down	--	--	--	--	--	--	--	Brain specific membrane anchored protein	--	S	Function unknown	PREDICTED: transmembrane protein 59-like [Meleagris gallopavo]
gene21807	606	1028	571	615	665	234	221	139	170	316	4.99473	7.159	3.59399	3.55835	5.16546	2.05262	1.75209	1.07281	1.51331	2.33318	0.0103272	-1.20304	down	--	--	--	--	--	--	--	Fibronectin type III domain;; Erythropoietin receptor, ligand binding;; Interleukin-6 receptor alpha chain, binding	Prolactin receptor (Precursor) GN=PRLR OS=Columba livia (Domestic pigeon) PE=2 SV=1	W	Extracellular structures	PREDICTED: cytokine receptor-like factor 1 isoform X4 [Gallus gallus]
gene21817	892	923	472	605	863	1259	2187	1475	1099	1281	4.3156	3.88079	1.91469	2.15698	3.93459	6.94393	8.9297	6.85787	6.17848	6.94737	1.09305e-06	1.42681	up	[O]	Posttranslational modification, protein turnover, chaperones	--	K01304|1.24516e-150|phi:102104306|K01304 pyroglutamyl-peptidase [EC:3.4.19.3] | (RefSeq) PGPEP1; pyroglutamyl-peptidase I	--	[O]	Posttranslational modification, protein turnover, chaperones	Pyroglutamyl peptidase	--	O	Posttranslational modification, protein turnover, chaperones	PREDICTED: pyroglutamyl-peptidase 1 [Pseudopodoces humilis]
gene21821	764	287	735	708	1356	51	32	61	66	153	4.58847	1.56924	4.23987	3.36157	7.89409	0.319881	0.146618	0.355425	0.403433	0.9098	0.00121048	-2.95622	down	--	--	Molecular Function: 3',5'-cyclic-nucleotide phosphodiesterase activity (GO:0004114);; Biological Process: signal transduction (GO:0007165);; Biological Process: metabolic process (GO:0008152);; Molecular Function: metal ion binding (GO:0046872);;	K13293|0|fch:102052170|K13293 cAMP-specific phosphodiesterase 4 [EC:3.1.4.53] | (RefSeq) PDE4C; phosphodiesterase 4C	Purine metabolism (ko00230)	[T]	Signal transduction mechanisms	3'5'-cyclic nucleotide phosphodiesterase	Dual 3&apos;,5&apos;-cyclic-AMP and -GMP phosphodiesterase 11A GN=pde11a OS=Takifugu rubripes (Japanese pufferfish) PE=3 SV=1	T	Signal transduction mechanisms	PREDICTED: cAMP-specific 3&apos;,5&apos;-cyclic phosphodiesterase 4C isoform X3 [Meleagris gallopavo]
gene21838	1003	1344	851	753	401	243	144	238	111	340	3.12588	3.25915	2.51778	1.80178	1.18253	0.788226	0.331868	0.74055	0.404497	0.955361	0.00886819	-1.52804	down	--	--	--	--	--	[O]	Posttranslational modification, protein turnover, chaperones	A-macroglobulin complement component;; Alpha-2-macroglobulin family N-terminal region;; Alpha-2-macroglobulin family;; A-macroglobulin receptor;; Farnesoic acid 0-methyl transferase;; Alpha-macro-globulin thiol-ester bond-forming region;; MG2 domain;; Prenyltransferase-like;; Kazal-type serine protease inhibitor domain	Ovostatin (Precursor) OS=Gallus gallus (Chicken) PE=1 SV=3	O	Posttranslational modification, protein turnover, chaperones	PREDICTED: C3 and PZP-like alpha-2-macroglobulin domain-containing protein 8 [Phaethon lepturus]
gene21839	129	160	62	99	68	28	22	9	5	21	0.370951	0.419197	0.158791	0.225187	0.189736	0.0933	0.053608	0.025222	0.016902	0.059062	0.00265968	-2.12573	down	--	--	--	K04236|0|gga:420139|K04236 coagulation factor II (thrombin) receptor-like 3 | (RefSeq) F2RL3; F2R like thrombin/trypsin receptor 3	Neuroactive ligand-receptor interaction (ko04080)	--	--	7 transmembrane receptor (rhodopsin family);; Serpentine type 7TM GPCR chemoreceptor Srsx	Proteinase-activated receptor 1 (Precursor) GN=f2r OS=Xenopus laevis (African clawed frog) PE=1 SV=1	T	Signal transduction mechanisms	PREDICTED: proteinase-activated receptor 4 [Gallus gallus]
gene21920	632	1111	270	2135	1977	77	168	85	157	323	12.5925	19.6958	4.7416	32.8858	38.3634	1.78744	2.93439	1.80252	3.65041	6.36815	0.0275957	-2.45615	down	--	--	Molecular Function: actin binding (GO:0003779);; Molecular Function: calmodulin binding (GO:0005516);; Biological Process: actomyosin structure organization (GO:0031032);;	--	--	[Z]	Cytoskeleton	Calponin family repeat;; Calponin homology (CH) domain	Calponin-1 GN=CNN1 OS=Gallus gallus (Chicken) PE=1 SV=2	Z	Cytoskeleton	RecName: Full=Calponin-1; AltName: Full=Calponin, smooth muscle [Gallus gallus]
gene21958	67	42	47	57	58	80	190	91	65	157	0.59171	0.337918	0.376796	0.397219	0.505347	0.836154	1.46312	0.7997	0.680173	1.3887	0.0204996	1.54286	up	--	--	--	K19935|1.64957e-77|gga:100858140|K19935 syncollin | (RefSeq) SYCN; syncollin	--	--	--	Syncollin	--	R	General function prediction only	PREDICTED: syncollin, partial [Gallus gallus]
gene21995	1560	1548	1897	3018	2412	405	338	542	480	820	29.184	26.5138	32.0374	44.9167	44.4008	9.08588	5.63963	10.3529	11.0528	15.6562	3.07495e-06	-1.50484	down	[I]	Lipid transport and metabolism	Molecular Function: catalytic activity (GO:0003824);; Molecular Function: receptor binding (GO:0005102);; Cellular Component: mitochondrion (GO:0005739);; Biological Process: metabolic process (GO:0008152);;	K12663|1.71269e-159|cmy:102929410|K12663 Delta(3,5)-Delta(2,4)-dienoyl-CoA isomerase [EC:5.3.3.-] | (RefSeq) ECH1; enoyl-CoA hydratase 1	Peroxisome (ko04146)	[I]	Lipid transport and metabolism	Enoyl-CoA hydratase/isomerase family	Enoyl-CoA hydratase domain-containing protein 3, mitochondrial (Precursor) GN=echdc3 OS=Danio rerio (Zebrafish) PE=2 SV=2	I	Lipid transport and metabolism	PREDICTED: delta(3,5)-Delta(2,4)-dienoyl-CoA isomerase, mitochondrial [Chelonia mydas]
gene22013	21942	17503	24340	13755	12449	63827	27186	87828	32674	58335	94.0532	68.5798	94.0022	46.8429	51.3141	322.444	99.6894	374.254	161.668	247.589	0.00233402	2.10005	up	--	--	Cellular Component: mitochondrion (GO:0005739);;	K18181|1.32332e-28|gga:426880|K18181 cytochrome c oxidase assembly factor 14 | (RefSeq) COX14; COX14, cytochrome c oxidase assembly factor	--	--	--	Cytochrome oxidase c assembly	Cytochrome c oxidase assembly protein COX14 homolog GN=si:dkey-222f2.8 OS=Danio rerio (Zebrafish) PE=3 SV=2	S	Function unknown	cytochrome c oxidase assembly homolog 14 [Gallus gallus]
gene22036	60	69	56	76	43	0	0	0	13	30	0.583783	0.616996	0.489034	0.586994	0.410078	0	0	0	0.14628	0.285398	0.000896668	-2.37521	down	--	--	Cellular Component: plasma membrane (GO:0005886);; Cellular Component: vesicle membrane (GO:0012506);; Cellular Component: cytoplasmic vesicle (GO:0031410);; Biological Process: single-organism process (GO:0044699);;	--	--	--	--	Domain of unknown function (DUF4203)	Transmembrane protein 198 GN=tmem198 OS=Xenopus tropicalis (Western clawed frog) PE=1 SV=1	S	Function unknown	PREDICTED: transmembrane protein 198-like [Meleagris gallopavo]
gene22083	416	369	667	908	361	0	0	0	0	0	2.79215	2.23211	4.36998	3.91536	2.28516	0	0	0	0	0	4.52941e-35	#NAME?	down	[K]	Transcription	--	K09296|0|gga:430698|K09296 homeobox protein HoxA/C/D11 | (RefSeq) HOXC11; homeobox C11	--	[K]	Transcription	Protein of unknown function (DUF3528);; Homeobox domain	Homeobox protein Hox-C11a OS=Danio rerio (Zebrafish) PE=2 SV=1	K	Transcription	PREDICTED: homeobox protein Hox-C11a [Gallus gallus]
gene22084	5771	5372	6386	6142	5670	0	0	0	5	0	71.835	60.855	71.4789	60.355	68.8512	0	0	0	0.059415	0	7.86569e-163	-11.7718	down	[K]	Transcription	--	K17444|0|gga:770471|K17444 homrobox protein Hox-C10 | (RefSeq) HOXC10, RP11-834C11.12; homeobox C10	--	[K]	Transcription	Homeobox domain	Homeobox protein Hox-D10 GN=HOXD10 OS=Heterodontus francisci (Horn shark) PE=3 SV=1	K	Transcription	PREDICTED: LOW QUALITY PROTEIN: homeobox protein Hox-C10 [Gallus gallus]
gene22087	259	144	300	209	252	11	34	8	7	32	6.47474	3.33033	6.84238	4.07993	6.16002	0.303448	0.693411	0.175006	0.176008	0.769562	2.31961e-07	-3.25872	down	--	--	Molecular Function: transcription factor activity, sequence-specific DNA binding (GO:0003700);; Cellular Component: nucleus (GO:0005634);; Biological Process: transcription, DNA-templated (GO:0006351);; Molecular Function: sequence-specific DNA binding (GO:0043565);;	K09294|0|gga:425723|K09294 homeobox protein HoxA/B/C/D9 | (RefSeq) HOXC9; homeobox C9	--	[K]	Transcription	Hox9 activation region;; Homeobox domain	Homeobox protein Hox-C9a GN=hoxc9a OS=Danio rerio (Zebrafish) PE=2 SV=2	K	Transcription	homeobox protein HoxC9 [Gallus gallus]
gene22090	18	44	64	15	6	68	51	69	49	97	0.379856	0.905799	1.359	0.270109	0.103535	1.74074	0.948063	1.5065	1.52232	2.19311	0.0211947	1.70612	up	--	--	Molecular Function: transcription factor activity, sequence-specific DNA binding (GO:0003700);; Cellular Component: nucleus (GO:0005634);; Biological Process: regulation of transcription, DNA-templated (GO:0006355);; Biological Process: anterior/posterior pattern specification (GO:0009952);; Molecular Function: sequence-specific DNA binding (GO:0043565);; Biological Process: embryonic skeletal sy…	K09306|2.33193e-147|gga:100858368|K09306 homeobox protein HoxA/B/C6 | (RefSeq) HOXC6, HOXC-6; homeobox C6	--	[R]	General function prediction only	Homeobox domain	Homeobox protein Hox-C6 GN=hoxc6 OS=Xenopus laevis (African clawed frog) PE=2 SV=2	K	Transcription	PREDICTED: homeobox protein Hox-C6 isoform X1 [Anolis carolinensis]
gene22097	335	257	307	384	389	21	11	34	21	92	3.53739	2.25465	2.66485	2.92957	3.8882	0.232893	0.085001	0.324521	0.228	0.878845	1.13979e-06	-2.78929	down	--	--	--	--	--	--	--	Zinc-finger of C2H2 type;; Zinc-finger double-stranded RNA-binding	Zinc finger protein 385B GN=znf385b OS=Danio rerio (Zebrafish) PE=2 SV=1	R	General function prediction only	PREDICTED: uncharacterized protein LOC102112144 [Pseudopodoces humilis]
gene22325	609	635	728	1102	1223	2399	3139	3645	4584	2908	5.695	5.53809	6.39478	8.18002	11.5938	27.539	27.3275	33.5915	51.9903	27.4342	6.57785e-07	2.49369	up	--	--	Molecular Function: ATP binding (GO:0005524);; Biological Process: carnosine biosynthetic process (GO:0035499);; Molecular Function: metal ion binding (GO:0046872);; Molecular Function: carnosine synthase activity (GO:0047730);;	K14755|0|gga:100359387|K14755 carnosine synthase [EC:6.3.2.11] | (RefSeq) CARNS1, ATPGD1; carnosine synthase 1	Arginine and proline metabolism (ko00330);; Histidine metabolism (ko00340);; beta-Alanine metabolism (ko00410)	--	--	--	Carnosine synthase 1 {ECO:0000312|EMBL:ADB91406.1} OS=Gallus gallus (Chicken) PE=1 SV=1	R	General function prediction only	carnosine synthase 1 [Gallus gallus]
gene22328	87	49	52	64	85	13	6	6	15	27	0.727585	0.374085	0.394598	0.422118	0.686279	0.121998	0.039284	0.042934	0.14234	0.222766	0.0122576	-1.85074	down	--	--	--	K05421|1.65473e-140|gga:100858060|K05421 B-cell stimulating factor 3 | (RefSeq) CLCF1; cardiotrophin-like cytokine factor 1	Cytokine-cytokine receptor interaction (ko04060)	--	--	Plethodontid receptivity factor PRF;; Ciliary neurotrophic factor	--	T	Signal transduction mechanisms	PREDICTED: LOW QUALITY PROTEIN: cardiotrophin-like cytokine factor 1-like [Gallus gallus]
gene2234	107	109	99	155	103	17	18	18	38	35	1.38507	1.29561	1.15607	1.6762	0.800672	0.23419	0.11862	0.137317	0.558572	0.416501	0.0210352	-1.64639	down	--	--	--	--	--	--	--	FAM70 protein	Transmembrane protein 255A GN=tmem255a OS=Xenopus laevis (African clawed frog) PE=2 SV=1	S	Function unknown	PREDICTED: transmembrane protein 255B [Pseudopodoces humilis]
gene2239	10036	7872	11519	8753	15770	46	167	49	36	164	79.5474	56.64	80.3017	89.5971	112.699	0.082308	0.29289	0.086281	0.074005	1.65936	7.29514e-26	-6.47984	down	--	--	Molecular Function: magnesium ion binding (GO:0000287);; Molecular Function: ADP-ribosylarginine hydrolase activity (GO:0003875);; Biological Process: protein de-ADP-ribosylation (GO:0051725);;	--	--	--	--	ADP-ribosylglycohydrolase	[Protein ADP-ribosylarginine] hydrolase-like protein 1 GN=adprhl1 OS=Xenopus laevis (African clawed frog) PE=2 SV=1	R	General function prediction only	PREDICTED: ADP-ribosylhydrolase like 1 isoform X3 [Gallus gallus]
gene22403	719	876	791	800	711	1676	2253	1954	1496	1127	2.22268	2.4689	2.20099	1.95475	2.1491	6.11322	6.03404	6.01244	5.45502	3.4544	3.62737e-08	1.64531	up	--	--	--	K08868|0|gga:426853|K08868 alpha-kinase | (RefSeq) ALPK2; alpha kinase 2	--	--	--	Alpha-kinase family;; Immunoglobulin I-set domain	--	R	General function prediction only	PREDICTED: alpha-protein kinase 2 [Gallus gallus]
gene22491	701	610	507	363	412	737	588	633	909	776	7.45736	4.59705	3.7192	2.32611	3.15166	8.73128	4.32642	6.14412	8.31417	5.69517	0.0152168	1.01063	up	--	--	Biological Process: suckling behavior (GO:0001967);; Biological Process: brainstem development (GO:0003360);; Molecular Function: ciliary neurotrophic factor receptor activity (GO:0004897);; Molecular Function: receptor binding (GO:0005102);; Cellular Component: plasma membrane (GO:0005886);; Biological Process: sex differentiation (GO:0007548);; Biological Process: positive regulation of cell pr…	K05059|0|gga:395885|K05059 ciliary neurotrophic factor receptor | (RefSeq) CNTFR; ciliary neurotrophic factor receptor	Cytokine-cytokine receptor interaction (ko04060)	--	--	Fibronectin type III domain;; Immunoglobulin domain	Ciliary neurotrophic factor receptor subunit alpha (Precursor) GN=CNTFR OS=Gallus gallus (Chicken) PE=2 SV=1	T	Signal transduction mechanisms	RecName: Full=Ciliary neurotrophic factor receptor subunit alpha; Short=CNTF receptor subunit alpha; Short=CNTFR-alpha; AltName: Full=Growth-promoting activity receptor subunit alpha; Short=GPA receptor subunit alpha; Short=GPAR-alpha; Flags: Precursor [Gallus gallus]
gene22541	473703	480160	415610	771725	483611	4366	5719	3440	5494	7406	6574.37	5995.17	4914.1	8439.29	6414.92	79.1701	78.2958	53.6379	94.8394	111.519	1.37797e-64	-6.12331	down	--	--	Cellular Component: stress fiber (GO:0001725);; Cellular Component: podosome (GO:0002102);; Molecular Function: actin binding (GO:0003779);; Biological Process: response to oxidative stress (GO:0006979);; Cellular Component: cortical cytoskeleton (GO:0030863);; Cellular Component: filamentous actin (GO:0031941);; Biological Process: regulation of ATPase activity (GO:0043462);;	K10374|1.12393e-111|phi:102102888|K10374 tropomyosin 2 | (RefSeq) TPM2; tropomyosin 2 (beta)	Cardiac muscle contraction (ko04260);; Adrenergic signaling in cardiomyocytes (ko04261)	[Z]	Cytoskeleton	Tropomyosin;; Tropomyosin like;; Laminin Domain II	Tropomyosin beta chain GN=TPM2 OS=Gallus gallus (Chicken) PE=1 SV=1	Z	Cytoskeleton	PREDICTED: tropomyosin alpha-4 chain-like isoform X12 [Ficedula albicollis]
gene22543	1201	771	919	1251	921	1342	3182	1858	1388	1302	17.7525	10.0525	12.2059	14.4744	13.2075	23.4124	39.7429	27.3699	23.4339	19.0888	0.00295031	1.32755	up	[P]	Inorganic ion transport and metabolism	Molecular Function: carbonate dehydratase activity (GO:0004089);; Biological Process: one-carbon metabolic process (GO:0006730);; Molecular Function: zinc ion binding (GO:0008270);;	K01672|0|gga:770004|K01672 carbonic anhydrase [EC:4.2.1.1] | (RefSeq) CA9; carbonic anhydrase 9	Nitrogen metabolism (ko00910)	[R]	General function prediction only	Eukaryotic-type carbonic anhydrase	Carbonic anhydrase 2 GN=ca2 OS=Tribolodon hakonensis (Big-scaled redfin) PE=2 SV=3	R	General function prediction only	PREDICTED: carbonic anhydrase 9 isoform X6 [Gallus gallus]
gene22558	1704	2877	1642	1634	1001	4784	7681	4347	3375	3068	3.85154	5.81559	3.29684	2.89202	2.1412	12.768	14.9149	9.69467	9.12175	6.78284	3.60041e-05	1.89748	up	--	--	Cellular Component: integral component of membrane (GO:0016021);;	K12325|0|gga:431663|K12325 atrial natriuretic peptide clearance receptor | (RefSeq) NPR3; natriuretic peptide receptor 3	--	[T]	Signal transduction mechanisms	Receptor family ligand binding region;; Periplasmic binding protein	Atrial natriuretic peptide receptor 2 (Precursor) GN=npr2 OS=Anguilla japonica (Japanese eel) PE=2 SV=1	T	Signal transduction mechanisms	PREDICTED: atrial natriuretic peptide receptor 3 isoform X1 [Gallus gallus]
gene22565	4314	3787	4191	4757	3042	1303	1126	1165	946	1789	32.5195	26.0676	28.3791	27.8971	22.3493	11.3436	7.23336	8.61585	8.25629	13.1398	5.7869e-05	-1.16377	down	--	--	--	--	--	--	--	C1q domain;; Collagen triple helix repeat (20 copies)	Caprin-2 GN=si:ch211-11c20.4 OS=Danio rerio (Zebrafish) PE=1 SV=1	W	Extracellular structures	PREDICTED: complement C1q tumor necrosis factor-related protein 3 isoformX2 [Gallus gallus]
gene22570	1167	1312	1369	1057	1098	1692	2537	1903	1443	1417	7.76905	7.96251	8.2038	5.56509	7.13744	13.2906	14.6314	12.6121	11.3256	9.35605	0.000336418	1.08373	up	[O]	Posttranslational modification, protein turnover, chaperones	Molecular Function: nucleic acid binding (GO:0003676);; Molecular Function: zinc ion binding (GO:0008270);;	K09506|0|gga:427434|K09506 DnaJ homolog subfamily A member 5 | (RefSeq) DNAJC21, DNAJA5; DnaJ heat shock protein family (Hsp40) member C21	--	[O]	Posttranslational modification, protein turnover, chaperones	DnaJ domain;; Zinc-finger double-stranded RNA-binding;; Zinc-finger of C2H2 type;; C2H2 type zinc-finger (2 copies)	DnaJ homolog subfamily C member 21 GN=dnajc21 OS=Danio rerio (Zebrafish) PE=2 SV=1	O	Posttranslational modification, protein turnover, chaperones	PREDICTED: dnaJ homolog subfamily C member 21 isoform X2 [Gallus gallus]
gene22571	101	134	70	95	75	208	232	282	186	119	0.793912	0.983927	0.492847	0.626052	0.616777	2.00282	1.63865	2.31868	1.83366	0.931469	0.00844468	1.63849	up	[E]	Amino acid transport and metabolism	--	K00827|0|gga:431666|K00827 alanine-glyoxylate transaminase / (R)-3-amino-2-methylpropionate-pyruvate transaminase [EC:2.6.1.44 2.6.1.40] | (RefSeq) AGXT2; alanine--glyoxylate aminotransferase 2	Alanine, aspartate and glutamate metabolism (ko00250);; Glycine, serine and threonine metabolism (ko00260);; Cysteine and methionine metabolism (ko00270);; Valine, leucine and isoleucine degradation (ko00280)	[E]	Amino acid transport and metabolism	Aminotransferase class-III	Ethanolamine-phosphate phospho-lyase GN=etnppl OS=Xenopus laevis (African clawed frog) PE=2 SV=1	E	Amino acid transport and metabolism	PREDICTED: alanine--glyoxylate aminotransferase 2, mitochondrial [Gallus gallus]
gene22589	32	50	62	8	92	113	159	157	171	170	0.135607	0.19757	0.242376	0.027266	0.390535	0.579197	0.637744	0.774488	0.875294	0.732476	0.000569634	2.12743	up	--	--	Molecular Function: growth factor activity (GO:0008083);;	K05452|7.51692e-96|mgp:100544935|K05452 glial cell derived neurotrophic factor | (RefSeq) GDNF; glial cell derived neurotrophic factor	--	--	--	Transforming growth factor beta like domain	Glial cell line-derived neurotrophic factor (Precursor) OS=Xenopus laevis (African clawed frog) PE=2 SV=1	T	Signal transduction mechanisms	PREDICTED: glial cell line-derived neurotrophic factor isoform X2 [Gallus gallus]
gene2259	2345	2046	2471	2231	2201	2698	4284	3244	2441	3686	14.4645	11.5335	13.0961	9.78761	13.3954	18.2202	22.2548	19.5148	16.8435	21.7431	0.000551235	1.01605	up	[G]	Carbohydrate transport and metabolism	Molecular Function: ATP binding (GO:0005524);; Biological Process: nicotinamide nucleotide metabolic process (GO:0046496);; Molecular Function: ATP-dependent NAD(P)H-hydrate dehydratase activity (GO:0047453);;	K17757|0|fab:101817373|K17757 ATP-dependent NAD(P)H-hydrate dehydratase [EC:4.2.1.93] | (RefSeq) NAXD, CARKD; NAD(P)HX dehydratase	--	[G]	Carbohydrate transport and metabolism	Carbohydrate kinase;; Myb/SANT-like DNA-binding domain	ATP-dependent (S)-NAD(P)H-hydrate dehydratase {ECO:0000255|HAMAP-Rule:MF_03157} GN=zgc:171429 OS=Danio rerio (Zebrafish) PE=3 SV=1	G	Carbohydrate transport and metabolism	PREDICTED: ATP-dependent (S)-NAD(P)H-hydrate dehydratase isoform X2 [Chrysemys picta bellii]
gene226	3773	6840	4717	4629	3549	14742	29326	19750	19798	13129	14.6468	21.4755	14.8374	13.2388	11.5756	67.9447	104.224	74.9818	92.1821	48.7754	2.31241e-10	2.55726	up	[H]	Coenzyme transport and metabolism	Molecular Function: nicotinate-nucleotide diphosphorylase (carboxylating) activity (GO:0004514);; Molecular Function: nicotinate phosphoribosyltransferase activity (GO:0004516);; Cellular Component: cytoplasm (GO:0005737);; Biological Process: NAD biosynthetic process (GO:0009435);; Molecular Function: nicotinamide phosphoribosyltransferase activity (GO:0047280);;	K03462|0|gga:417707|K03462 nicotinamide phosphoribosyltransferase [EC:2.4.2.12] | (RefSeq) NAMPT, NAMPTP1, PBEF1, visfatin; nicotinamide phosphoribosyltransferase	Nicotinate and nicotinamide metabolism (ko00760)	--	--	Nicotinate phosphoribosyltransferase (NAPRTase) family	--	H	Coenzyme transport and metabolism	nicotinamide phosphoribosyltransferase [Gallus gallus]
gene22606	1186	889	534	729	464	23	19	22	26	35	3.34421	2.13122	1.66636	1.59124	1.19161	0.06928	0.041841	0.057337	0.07889	0.089981	4.67203e-10	-4.42906	down	--	--	Biological Process: lipid metabolic process (GO:0006629);; Molecular Function: phosphoric diester hydrolase activity (GO:0008081);;	--	--	[T]	Signal transduction mechanisms	Phosphatidylinositol-specific phospholipase C, X domain	PI-PLC X domain-containing protein 3 GN=plcxd3 OS=Danio rerio (Zebrafish) PE=2 SV=1	T	Signal transduction mechanisms	PREDICTED: PI-PLC X domain-containing protein 3 [Gallus gallus]
gene22615	112	32	0	46	118	305	163	455	300	129	0.467909	0.273767	0	0.242915	0.478357	1.51914	0.76072	1.9509	1.54984	0.590681	0.00211199	2.63199	up	[RTKL]	General function prediction only;; Signal transduction mechanisms;; Transcription;; Replication, recombination and repair	Molecular Function: magnesium ion binding (GO:0000287);; Molecular Function: protein serine/threonine kinase activity (GO:0004674);; Molecular Function: ATP binding (GO:0005524);;	K16310|0|gga:768482|K16310 serine/threonine-protein kinase NIM1 [EC:2.7.11.1] | (RefSeq) NIM1K, NIM1; NIM1 serine/threonine protein kinase	--	[T]	Signal transduction mechanisms	Protein kinase domain;; Protein tyrosine kinase;; Kinase-like	Serine/threonine-protein kinase SIK2 GN=SIK2 OS=Gallus gallus (Chicken) PE=2 SV=1	T	Signal transduction mechanisms	PREDICTED: serine/threonine-protein kinase NIM1 [Meleagris gallopavo]
gene22713	2424	2115	3146	2080	2672	3902	5529	3835	2584	2471	5.10261	3.97857	5.87705	3.48373	5.38109	9.59882	10.0085	8.10134	6.26029	4.98897	0.00489654	1.05726	up	[RTKL]	General function prediction only;; Signal transduction mechanisms;; Transcription;; Replication, recombination and repair	Molecular Function: magnesium ion binding (GO:0000287);; Molecular Function: protein serine/threonine kinase activity (GO:0004674);; Molecular Function: ATP binding (GO:0005524);;	K08789|0|gga:427169|K08789 microtubule-associated serine/threonine kinase [EC:2.7.11.1] | (RefSeq) MAST4; microtubule associated serine/threonine kinase family member 4	--	[TR]	Signal transduction mechanisms;; General function prediction only	Domain of unknown function (DUF1908);; Protein kinase domain;; Protein tyrosine kinase;; PDZ domain (Also known as DHR or GLGF);; PDZ domain	Microtubule-associated serine/threonine-protein kinase 3 GN=mast3 OS=Xenopus laevis (African clawed frog) PE=2 SV=1	T	Signal transduction mechanisms	PREDICTED: microtubule-associated serine/threonine-protein kinase 4 isoform X15 [Gallus gallus]
gene22733	6475	7065	7990	7377	5994	13019	16210	17349	11570	13412	87.389	86.912	97.0679	78.7229	79.0487	207.174	189.43	232.979	184.124	179.473	1.58379e-06	1.54721	up	[E]	Amino acid transport and metabolism	Cellular Component: cytoplasm (GO:0005737);; Molecular Function: zinc ion binding (GO:0008270);; Molecular Function: S-adenosylmethionine-homocysteine S-methyltransferase activity (GO:0008898);; Biological Process: methionine biosynthetic process (GO:0009086);; Molecular Function: betaine-homocysteine S-methyltransferase activity (GO:0047150);;	K00544|0|gga:416371|K00544 betaine-homocysteine S-methyltransferase [EC:2.1.1.5] | (RefSeq) BHMT, BHMT2; betaine--homocysteine S-methyltransferase	Glycine, serine and threonine metabolism (ko00260);; Cysteine and methionine metabolism (ko00270)	[E]	Amino acid transport and metabolism	Homocysteine S-methyltransferase	Betaine--homocysteine S-methyltransferase 1 GN=bhmt OS=Xenopus laevis (African clawed frog) PE=2 SV=1	E	Amino acid transport and metabolism	PREDICTED: betaine--homocysteine S-methyltransferase 1 [Gallus gallus]
gene22906	661	570	787	538	651	1098	1398	1484	1182	1041	2.48111	1.94773	2.66592	1.59418	2.39224	4.86469	4.54337	5.54198	5.22779	3.87383	3.33715e-06	1.46123	up	--	--	Cellular Component: nucleus (GO:0005634);; Biological Process: regulation of transcription, DNA-templated (GO:0006355);; Biological Process: segment specification (GO:0007379);; Biological Process: anterior/posterior pattern specification (GO:0009952);; Biological Process: negative regulation of canonical Wnt signaling pathway (GO:0090090);; Biological Process: positive regulation of Wnt signalin…	K15187|0|clv:102094733|K15187 YEATS domain-containing protein 1/3 | (RefSeq) MLLT3; MLLT3, super elongation complex subunit	--	[K]	Transcription	YEATS family	--	K	Transcription	PREDICTED: protein AF-9 isoform X4 [Gallus gallus]
gene22931	1158	1303	1271	1108	1311	2078	3693	2238	1458	1711	7.68379	7.48557	7.20834	5.50136	8.43932	16.3501	20.6773	14.7161	10.9886	11.1156	0.00035802	1.3433	up	--	--	Cellular Component: integral component of membrane (GO:0016021);;	--	--	--	--	CD20-like family	--	S	Function unknown	PREDICTED: protein FAM189A2 isoform X2 [Gallus gallus]
gene2294	2547	1162	2204	1936	1748	4766	8167	6559	4524	4241	17.6471	6.55039	14.6675	10.4645	11.5864	35.7244	49.7819	48.4437	35.5066	25.2811	4.80537e-11	2.05105	up	[QR]	Secondary metabolites biosynthesis, transport and catabolism;; General function prediction only	--	--	--	[A]	RNA processing and modification	Putative methyltransferase;; Methyltransferase domain	Protein-lysine methyltransferase METTL21B GN=mettl21b OS=Xenopus tropicalis (Western clawed frog) PE=2 SV=1	A	RNA processing and modification	PREDICTED: protein-lysine methyltransferase METTL21E-like isoform X2 [Gallus gallus]
gene22950	51	182	64	98	125	396	762	1024	604	341	0.459114	1.55213	0.534406	0.72751	1.13962	4.28321	6.11042	9.52042	6.64925	3.17028	4.37212e-06	3.10112	up	[C]	Energy production and conversion	Molecular Function: retinal dehydrogenase activity (GO:0001758);; Cellular Component: cytoplasm (GO:0005737);; Biological Process: retinol metabolic process (GO:0042572);;	K07249|0|gga:395264|K07249 retinal dehydrogenase [EC:1.2.1.36] | (RefSeq) ALDH1A1, GGADHR; aldehyde dehydrogenase 1 family member A1	Retinol metabolism (ko00830)	[C]	Energy production and conversion	Aldehyde dehydrogenase family	Retinal dehydrogenase 1 GN=ALDH1A1 OS=Gallus gallus (Chicken) PE=2 SV=1	C	Energy production and conversion	PREDICTED: retinal dehydrogenase 1 [Nipponia nippon]
gene22969	2973	2777	3016	2841	2440	4549	10595	4462	5042	3437	6.07126	4.27755	5.40677	4.44152	4.73708	10.2852	17.7075	8.23301	11.775	5.66639	0.00896711	1.49449	up	--	--	--	K19525|0|gga:427050|K19525 vacuolar protein sorting-associated protein 13A/C | (RefSeq) VPS13A; vacuolar protein sorting 13 homolog A	--	[U]	Intracellular trafficking, secretion, and vesicular transport	Protein of unknown function (DUF1162);; N-terminal region of Chorein, a TM vesicle-mediated sorter;; ATG C terminal domain	--	U	Intracellular trafficking, secretion, and vesicular transport	vacuolar protein sorting 13 homolog A [Gallus gallus]
gene2298	863	483	1420	1267	635	71	158	71	86	143	13.2542	6.66282	19.3239	15.939	10.2182	0.864641	1.39025	1.09875	1.81346	2.69834	6.97081e-07	-2.64866	down	[R]	General function prediction only	--	--	--	[R]	General function prediction only	Alpha/beta hydrolase family;; Alpha/beta hydrolase family	--	S	Function unknown	testis-expressed sequence 30 protein [Gallus gallus]
gene2299	26021	25578	26981	59279	27838	414	517	320	172	627	209.284	185.728	194.135	375.855	218.562	4.00861	3.7455	2.5994	1.63873	5.1436	2.52128e-23	-5.84686	down	--	--	Molecular Function: protein-lysine N-methyltransferase activity (GO:0016279);; Biological Process: peptidyl-lysine methylation (GO:0018022);;	--	--	[A]	RNA processing and modification	Putative methyltransferase;; Putative methyltransferase	Protein-lysine methyltransferase METTL21B GN=mettl21b OS=Xenopus tropicalis (Western clawed frog) PE=2 SV=1	A	RNA processing and modification	PREDICTED: protein-lysine methyltransferase METTL21C [Gallus gallus]
gene23004	19515	16856	19495	18139	16829	35883	52212	42928	31279	39898	223.245	175.756	200.732	164.055	188.1	483.952	517.146	488.581	421.885	452.499	8.70108e-07	1.64744	up	[G]	Carbohydrate transport and metabolism	Biological Process: carbohydrate metabolic process (GO:0005975);; Molecular Function: fructose 1,6-bisphosphate 1-phosphatase activity (GO:0042132);;	K03841|0|gga:395217|K03841 fructose-1,6-bisphosphatase I [EC:3.1.3.11] | (RefSeq) FBP2; fructose-bisphosphatase 2	Glycolysis / Gluconeogenesis (ko00010);; Pentose phosphate pathway (ko00030);; Fructose and mannose metabolism (ko00051);; Carbon metabolism (ko01200);; Insulin signaling pathway (ko04910)	[G]	Carbohydrate transport and metabolism	Fructose-1-6-bisphosphatase;; Inositol monophosphatase family	--	G	Carbohydrate transport and metabolism	PREDICTED: fructose-1,6-bisphosphatase isozyme 2 [Gallus gallus]
gene23188	3659	4068	4048	4625	3887	1223	1441	1292	929	1542	19.8481	20.2852	19.8363	19.6441	20.6983	7.84463	6.35347	6.71476	5.78902	8.29257	6.5864e-05	-1.16158	down	--	--	--	K04281|0|gga:427121|K04281 calpastatin | (RefSeq) CAST; calpastatin	--	--	--	Calpain inhibitor	--	R	General function prediction only	calpastatin [Gallus gallus]
gene23192	70	227	126	212	265	267	739	494	309	697	2.49636	7.43807	4.0608	6.03705	9.33125	11.3261	23.0533	17.7096	13.1236	24.9007	4.71079e-06	1.92816	up	[O]	Posttranslational modification, protein turnover, chaperones	Cellular Component: nucleus (GO:0005634);; Cellular Component: mitochondrion (GO:0005739);; Molecular Function: electron carrier activity (GO:0009055);; Molecular Function: protein disulfide oxidoreductase activity (GO:0015035);; Biological Process: electron transport chain (GO:0022900);; Biological Process: cell redox homeostasis (GO:0045454);; Molecular Function: protein N-terminus binding (GO:…	K03676|1.56303e-66|gga:396069|K03676 glutaredoxin 3 | (RefSeq) GLRX, GRX; glutaredoxin	--	[O]	Posttranslational modification, protein turnover, chaperones	Glutaredoxin;; Glutaredoxin-like domain (DUF836)	Glutaredoxin-1 GN=GLRX OS=Gallus gallus (Chicken) PE=3 SV=1	O	Posttranslational modification, protein turnover, chaperones	glutaredoxin-1 [Gallus gallus]
gene23193	273	51	210	223	292	2833	1421	1342	2112	750	0.934714	0.120098	0.614047	0.571467	0.944233	11.3807	4.17945	4.66599	8.97946	2.68573	0.000376867	3.58048	up	--	--	Molecular Function: GTP binding (GO:0005525);; Biological Process: small GTPase mediated signal transduction (GO:0007264);;	K07869|0|gga:431569|K07869 Rho-related BTB domain-containing protein 3 | (RefSeq) RHOBTB3; Rho related BTB domain containing 3	--	--	--	BTB/POZ domain;; Ras family	Kelch-like protein 30 GN=klhl30 OS=Xenopus laevis (African clawed frog) PE=2 SV=1	R	General function prediction only	PREDICTED: rho-related BTB domain-containing protein 3 isoform X4 [Gallus gallus]
gene23254	2159	1639	2414	2992	1274	422	464	632	498	843	4.64167	3.57144	4.21534	4.87067	2.88368	0.83411	0.652037	1.4073	1.09577	2.05935	8.5616e-06	-1.36135	down	--	--	Molecular Function: calcium ion binding (GO:0005509);; Molecular Function: hyaluronic acid binding (GO:0005540);; Cellular Component: proteinaceous extracellular matrix (GO:0005578);; Biological Process: cell adhesion (GO:0007155);; Molecular Function: carbohydrate binding (GO:0030246);;	K06793|0|gga:395565|K06793 versican core protein | (RefSeq) VCAN, PG-M; versican	Cell adhesion molecules (CAMs) (ko04514)	--	--	Extracellular link domain;; Lectin C-type domain;; Immunoglobulin V-set domain;; EGF-like domain;; Sushi domain (SCR repeat)	Versican core protein (Precursor) GN=VCAN OS=Gallus gallus (Chicken) PE=2 SV=1	T	Signal transduction mechanisms	versican core protein precursor [Gallus gallus]
gene23265	21807	21072	25439	26553	33340	35132	60151	44063	33020	36458	295.121	259.929	309.868	284.115	440.845	560.552	704.825	593.285	526.879	489.164	0.000914345	1.19211	up	[E]	Amino acid transport and metabolism	Molecular Function: creatine kinase activity (GO:0004111);; Molecular Function: ATP binding (GO:0005524);; Cellular Component: mitochondrial inner membrane (GO:0005743);;	K00933|0|gga:396508|K00933 creatine kinase [EC:2.7.3.2] | (RefSeq) CKMT2, MIBCK, SMTCK; creatine kinase, mitochondrial 2	Arginine and proline metabolism (ko00330)	[C]	Energy production and conversion	ATP:guanido phosphotransferase, C-terminal catalytic domain;; ATP:guanido phosphotransferase, N-terminal domain	Creatine kinase S-type, mitochondrial (Precursor) GN=CKMT2 OS=Gallus gallus (Chicken) PE=1 SV=2	C	Energy production and conversion	creatine kinase S-type, mitochondrial [Gallus gallus]
gene23309	342	458	422	361	307	765	791	741	561	771	1.70107	2.76045	1.67197	1.23865	1.174	3.79919	3.06965	2.80012	2.81503	3.11763	0.00016383	1.45036	up	[UR]	Intracellular trafficking, secretion, and vesicular transport;; General function prediction only	--	K17921|0|gga:427330|K17921 sorting nexin-7/30 | (RefSeq) SNX30; sorting nexin family member 30	--	[U]	Intracellular trafficking, secretion, and vesicular transport	PX domain;; Vps5 C terminal like;; BAR domain	Sorting nexin-30 GN=snx30 OS=Xenopus laevis (African clawed frog) PE=2 SV=1	U	Intracellular trafficking, secretion, and vesicular transport	PREDICTED: sorting nexin-30 [Gallus gallus]
gene23315	168	223	187	241	131	186	343	390	314	477	1.20263	1.52677	1.24453	1.59376	0.944024	1.81285	2.38768	3.90216	3.40253	4.07427	0.011021	1.3457	up	--	--	--	--	--	[T]	Signal transduction mechanisms	Sushi domain (SCR repeat);; Calcium-binding EGF domain	Sushi repeat-containing protein SRPX2 (Precursor) GN=srpx2 OS=Xenopus laevis (African clawed frog) PE=2 SV=1	T	Signal transduction mechanisms	PREDICTED: sushi domain-containing protein 1 isoform X3 [Gallus gallus]
gene23329	1150	1177	983	1088	431	217	226	318	185	614	5.54559	5.21331	4.19919	4.12943	2.05756	1.23963	0.951829	1.51947	1.28612	3.11806	0.0183542	-1.16527	down	--	--	Biological Process: activation of MAPK activity (GO:0000187);; Biological Process: G-protein coupled receptor signaling pathway (GO:0007186);; Cellular Component: cell surface (GO:0009986);; Cellular Component: integral component of membrane (GO:0016021);; Cellular Component: endocytic vesicle (GO:0030139);; Molecular Function: PDZ domain binding (GO:0030165);; Biological Process: bleb assembly (…	K04289|0|gga:427339|K04289 lysophosphatidic acid receptor 1 | (RefSeq) LPAR1, EDG2; lysophosphatidic acid receptor 1	Neuroactive ligand-receptor interaction (ko04080);; Gap junction (ko04540)	[R]	General function prediction only	7 transmembrane receptor (rhodopsin family)	Lysophosphatidic acid receptor 1-A GN=lpar1-a OS=Xenopus laevis (African clawed frog) PE=2 SV=1	T	Signal transduction mechanisms	PREDICTED: lysophosphatidic acid receptor 1 isoform X1 [Calypte anna]
gene23383	57	96	65	98	65	60	277	189	117	155	0.571745	0.873515	0.585889	0.776832	0.635306	0.707371	2.41658	1.89147	1.39025	1.54547	0.0167361	1.53901	up	--	--	--	--	--	[R]	General function prediction only	Integrase core domain;; RNase H;; Integrase DNA binding domain;; Integrase Zinc binding domain;; Reverse transcriptase (RNA-dependent DNA polymerase);; Reverse transcriptase thumb domain	Endonuclease (Fragments) GN=POL OS=Gallus gallus (Chicken) PE=3 SV=1	R	General function prediction only	PREDICTED: LOW QUALITY PROTEIN: endogenous retrovirus group K member 25 Pol protein-like [Meleagris gallopavo]
gene23405	5428	4742	7145	9769	6750	448	1029	806	575	679	45.8003	36.4813	55.0035	65.5884	56.1451	4.4887	7.51501	6.81431	5.71943	5.67706	1.16281e-21	-2.75716	down	--	--	Molecular Function: tropomyosin binding (GO:0005523);; Biological Process: muscle contraction (GO:0006936);; Cellular Component: COP9 signalosome (GO:0008180);; Biological Process: adult locomotory behavior (GO:0008344);; Cellular Component: membrane (GO:0016020);; Cellular Component: myofibril (GO:0030016);; Biological Process: myofibril assembly (GO:0030239);; Cellular Component: cortical cytos…	K10370|0|gga:395883|K10370 tropomodulin | (RefSeq) TMOD1, E-Tmod, tropomodulin-1; tropomodulin 1	--	[Z]	Cytoskeleton	Tropomodulin	--	Z	Cytoskeleton	tropomodulin-1 [Gallus gallus]
gene23528	71	38	59	68	64	271	235	407	261	71	0.36147	0.177416	0.273487	0.274999	0.323502	1.68529	1.05957	2.12372	1.61147	0.366085	0.00109293	2.60574	up	[RTKL]	General function prediction only;; Signal transduction mechanisms;; Transcription;; Replication, recombination and repair	Molecular Function: magnesium ion binding (GO:0000287);; Molecular Function: protein serine/threonine kinase activity (GO:0004674);; Molecular Function: ATP binding (GO:0005524);;	K16310|0|gga:768482|K16310 serine/threonine-protein kinase NIM1 [EC:2.7.11.1] | (RefSeq) NIM1K, NIM1; NIM1 serine/threonine protein kinase	--	[T]	Signal transduction mechanisms	Protein kinase domain;; Protein tyrosine kinase;; Kinase-like	Serine/threonine-protein kinase SIK2 GN=SIK2 OS=Gallus gallus (Chicken) PE=2 SV=1	T	Signal transduction mechanisms	PREDICTED: serine/threonine-protein kinase NIM1 [Meleagris gallopavo]
gene23546	466	0	3	0	545	306	656	532	465	619	7.90982	0	0.03727	0	9.04631	6.12115	9.6563	8.99306	9.31456	10.4219	0.00288163	1.70765	up	[O]	Posttranslational modification, protein turnover, chaperones	--	--	--	[C]	Energy production and conversion	SPFH domain / Band 7 family	--	C	Energy production and conversion	PREDICTED: stomatin-like protein 2, mitochondrial [Balearica regulorum gibbericeps]
gene23664	5	3	32	0	16	478	1220	1022	132	237	0.040867	0.003742	0.065673	0	0.034266	3.40031	9.77452	8.49436	0.806667	1.47997	1.19418e-05	6.2406	up	[RTKL]	General function prediction only;; Signal transduction mechanisms;; Transcription;; Replication, recombination and repair	--	K08858|0|gga:101748417|K08858 serine/threonine-protein kinase SBK [EC:2.7.11.1] | (RefSeq) SBK3; SH3 domain binding kinase family member 3	--	[T]	Signal transduction mechanisms	Protein kinase domain;; Protein tyrosine kinase	Serine/threonine-protein kinase SBK1 GN=sbk1 OS=Danio rerio (Zebrafish) PE=1 SV=1	T	Signal transduction mechanisms	PREDICTED: putative uncharacterized serine/threonine-protein kinase SgK110-like isoform X2 [Gallus gallus]
gene23665	25	25	1	22	0	1630	1141	4684	998	1106	0.045319	0.039544	0.001436	0.034463	0	4.08548	5.57623	47.5752	3.4137	4.85828	1.08541e-05	7.56112	up	--	--	--	--	--	--	--	Scavenger receptor cysteine-rich domain;; Scavenger receptor cysteine-rich domain	Lysyl oxidase homolog 2 (Precursor) GN=LOXL2 OS=Gallus gallus (Chicken) PE=3 SV=1	R	General function prediction only	PREDICTED: soluble scavenger receptor cysteine-rich domain-containing protein SSC5D-like isoform X2 [Gallus gallus]
gene23833	139	113	183	145	153	716	636	834	712	590	0.84124	0.592308	0.911678	0.714026	1.20029	6.29584	3.88761	4.49073	5.43654	4.75732	6.44221e-13	2.78264	up	--	--	--	--	--	[L]	Replication, recombination and repair	DDE superfamily endonuclease	Putative nuclease HARBI1 GN=harbi1 OS=Danio rerio (Zebrafish) PE=2 SV=1	L	Replication, recombination and repair	PREDICTED: uncharacterized protein LOC101751955 [Gallus gallus]
gene23865	387	827	451	825	298	125	163	167	189	280	3.61391	8.61291	4.31469	7.36255	3.25523	1.4605	1.33895	2.00738	1.99731	2.97977	0.0462373	-1.07212	down	--	--	Cellular Component: integral component of membrane (GO:0016021);; Molecular Function: lysophosphatidic acid receptor activity (GO:0070915);;	K04291|0|gga:426086|K04291 lysophosphatidic acid receptor 2 | (RefSeq) LPAR2, EDG4; lysophosphatidic acid receptor 2	Neuroactive ligand-receptor interaction (ko04080)	[R]	General function prediction only	7 transmembrane receptor (rhodopsin family)	Lysophosphatidic acid receptor 1-A GN=lpar1-a OS=Xenopus laevis (African clawed frog) PE=2 SV=1	T	Signal transduction mechanisms	PREDICTED: lysophosphatidic acid receptor 2 [Meleagris gallopavo]
gene23869	132563	107258	142105	135547	136914	280520	355211	312667	273080	312964	984.022	728.32	952.78	797.82	995.822	2451.18	2290.09	2319.07	2391.53	2307.11	2.70311e-07	1.73275	up	[G]	Carbohydrate transport and metabolism	Molecular Function: 6-phosphofructokinase activity (GO:0003872);; Molecular Function: ATP binding (GO:0005524);; Cellular Component: 6-phosphofructokinase complex (GO:0005945);; Biological Process: fructose 6-phosphate metabolic process (GO:0006002);; Biological Process: glycolytic process (GO:0006096);; Molecular Function: protein C-terminus binding (GO:0008022);; Biological Process: phosphoryla…	K00850|0|gga:374064|K00850 6-phosphofructokinase 1 [EC:2.7.1.11] | (RefSeq) PFKM; phosphofructokinase, muscle	Glycolysis / Gluconeogenesis (ko00010);; Pentose phosphate pathway (ko00030);; Fructose and mannose metabolism (ko00051);; Galactose metabolism (ko00052);; Carbon metabolism (ko01200);; Biosynthesis of amino acids (ko01230);; RNA degradation (ko03018)	[G]	Carbohydrate transport and metabolism	Phosphofructokinase	--	G	Carbohydrate transport and metabolism	6-phosphofructokinase, muscle type [Gallus gallus]
gene23948	1348	1073	1675	2285	1878	518	276	492	455	1063	12.9767	12.0985	13.8837	16.7959	10.356	3.27787	2.77929	2.59796	4.49666	5.47126	0.00592598	-1.06037	down	--	--	Biological Process: RNA metabolic process (GO:0016070);;	K16865|1.22416e-179|acs:100558313|K16865 programmed cell death protein 4 | (RefSeq) programmed cell death protein 4	--	[T]	Signal transduction mechanisms	MA3 domain	Programmed cell death protein 4 GN=PDCD4 OS=Gallus gallus (Chicken) PE=2 SV=1	T	Signal transduction mechanisms	PREDICTED: programmed cell death protein 4-like [Haliaeetus leucocephalus]
gene23988	563	566	501	1072	819	39	17	88	44	76	6.69832	5.89909	5.21385	9.48246	8.95819	0.506996	0.156047	0.959626	0.580954	0.854081	4.64827e-13	-3.22051	down	--	--	--	--	--	[R]	General function prediction only	Tetratricopeptide repeat;; Tetratricopeptide repeat;; TPR repeat;; Tetratricopeptide repeat;; Tetratricopeptide repeat;; Soluble NSF attachment protein, SNAP;; Tetratricopeptide repeat	--	R	General function prediction only	PREDICTED: tetratricopeptide repeat protein 24-like isoform X1 [Meleagris gallopavo]
gene24026	43127	40759	32549	47975	14985	9172	7175	9659	6686	18634	190.992	164.661	129.786	171.155	64.8347	47.8778	27.5095	42.5538	34.9939	81.5563	0.00592921	-1.31547	down	--	--	Molecular Function: extracellular matrix structural constituent (GO:0005201);; Cellular Component: collagen trimer (GO:0005581);; Molecular Function: metal ion binding (GO:0046872);;	K06236|5.00405e-165|fch:102046312|K06236 collagen, type I, alpha | (RefSeq) COL1A1; collagen type I alpha 1 chain	Focal adhesion (ko04510);; ECM-receptor interaction (ko04512);; AGE-RAGE signaling pathway in diabetic complications (ko04933)	[W]	Extracellular structures	Collagen triple helix repeat (20 copies);; Fibrillar collagen C-terminal domain;; von Willebrand factor type C domain	Collagen alpha-1(I) chain (Precursor) GN=COL1A1 OS=Gallus gallus (Chicken) PE=1 SV=3	W	Extracellular structures	collagen, partial [Gallus gallus]
gene24189	281	327	390	616	270	38	57	45	111	105	8.03306	9.04256	11.2025	15.0847	8.21144	1.12346	1.31925	1.42341	3.9202	2.78008	0.000641309	-1.85271	down	--	--	Cellular Component: photoreceptor outer segment (GO:0001750);; Molecular Function: G-protein coupled receptor activity (GO:0004930);; Biological Process: G-protein coupled receptor signaling pathway (GO:0007186);; Biological Process: visual perception (GO:0007601);; Biological Process: phototransduction (GO:0007602);; Molecular Function: photoreceptor activity (GO:0009881);; Cellular Component: i…	K04251|1.41558e-62|gga:396421|K04251 long/medium wavelength-sensitive opsin | (RefSeq) OPN1LW; opsin 1 (cone pigments), long-wave-sensitive (color blindness, protan)	--	[R]	General function prediction only	7 transmembrane receptor (rhodopsin family)	Red-sensitive opsin OS=Gallus gallus (Chicken) PE=1 SV=1	T	Signal transduction mechanisms	long wavelength-sensitive opsin [Uta stansburiana]
gene24244	14853	11127	17760	18063	14303	40870	52343	37369	35271	37239	434.889	296.959	468.042	418.162	409.193	1410.86	1326.97	1088.6	1217.65	1081.01	6.29926e-09	1.93183	up	[G]	Carbohydrate transport and metabolism	--	K00688|1.70066e-65|asn:102372584|K00688 glycogen phosphorylase [EC:2.4.1.1] | (RefSeq) PYGM; glycogen phosphorylase, muscle associated	Starch and sucrose metabolism (ko00500);; Insulin signaling pathway (ko04910)	[G]	Carbohydrate transport and metabolism	Carbohydrate phosphorylase	--	G	Carbohydrate transport and metabolism	PREDICTED: glycogen phosphorylase, liver form-like [Haliaeetus albicilla]
gene24320	7863	4880	3929	4746	4607	9693	13306	8605	10336	9935	65.0029	36.8457	29.319	31.0218	37.1934	94.5253	95.136	71.9556	100.597	81.3113	1.8892e-06	1.48618	up	--	--	Molecular Function: transcriptional activator activity, RNA polymerase II core promoter proximal region sequence-specific binding (GO:0001077);; Biological Process: positive regulation of endothelial cell proliferation (GO:0001938);; Biological Process: cell migration involved in sprouting angiogenesis (GO:0002042);; Molecular Function: steroid hormone receptor activity (GO:0003707);; Molecular F…	K04465|0|fab:101809771|K04465 nuclear receptor subfamily 4 group A member 1 | (RefSeq) NR4A1; nuclear receptor subfamily 4 group A member 1	MAPK signaling pathway (ko04010)	[K]	Transcription	Zinc finger, C4 type (two domains);; Ligand-binding domain of nuclear hormone receptor	Nuclear receptor subfamily 4 group A member 1 GN=nr4a1 OS=Xenopus laevis (African clawed frog) PE=2 SV=1	K	Transcription	PREDICTED: nuclear receptor subfamily 4 group A member 1 [Haliaeetus leucocephalus]
gene24642	44	99	103	125	67	20	16	5	0	41	2.61335	5.66899	5.72965	4.30119	3.70351	1.18935	0.851538	0.222551	0	2.3312	0.00846636	-1.9732	down	--	--	--	K10803|1.11093e-12|xtr:100380033|K10803 DNA-repair protein XRCC1 | (RefSeq) xrcc1, rcc; X-ray repair complementing defective repair in Chinese hamster cells 1	Base excision repair (ko03410)	[L]	Replication, recombination and repair	XRCC1 N terminal domain	--	L	Replication, recombination and repair	PREDICTED: DNA repair protein XRCC1 [Xenopus (Silurana) tropicalis]
gene2469	5147	3514	5858	5983	6498	10042	15577	10368	10350	10203	49.5093	30.9595	49.5336	44.2909	63.8041	118.376	135.931	101.258	120.847	103.524	5.81179e-07	1.56769	up	--	--	Biological Process: mitochondrial transport (GO:0006839);; Cellular Component: integral component of membrane (GO:0016021);; Cellular Component: mitochondrial membrane (GO:0031966);;	K15106|0|gga:418845|K15106 solute carrier family 25 (mitochondrial carrier), member 14/30 | (RefSeq) SLC25A30; solute carrier family 25 member 30	--	[C]	Energy production and conversion	Mitochondrial carrier protein	Kidney mitochondrial carrier protein 1 GN=slc25a30 OS=Xenopus tropicalis (Western clawed frog) PE=2 SV=1	C	Energy production and conversion	PREDICTED: kidney mitochondrial carrier protein 1 isoform X2 [Gallus gallus]
gene24733	895	1120	1021	1332	1202	140	192	185	246	430	8.85899	10.469	7.81671	9.65877	11.2047	1.35904	1.40067	1.54701	2.8183	3.97556	2.52884e-06	-1.73946	down	--	--	--	--	--	--	--	Cell division protein anillin;; Hr1 repeat;; PH domain	Rhotekin-2 GN=rtkn2 OS=Xenopus laevis (African clawed frog) PE=2 SV=1	T	Signal transduction mechanisms	PREDICTED: rhotekin-like [Anolis carolinensis]
gene24885	1214	2341	1669	2410	2090	305	448	496	398	596	16.4956	29.4347	19.8578	27.3452	27.657	4.99235	5.12234	6.52496	6.19239	7.86397	1.07872e-07	-1.61754	down	[T]	Signal transduction mechanisms	Molecular Function: pyruvate dehydrogenase (acetyl-transferring) kinase activity (GO:0004740);; Molecular Function: ATP binding (GO:0005524);; Cellular Component: nucleus (GO:0005634);; Cellular Component: mitochondrial pyruvate dehydrogenase complex (GO:0005967);; Biological Process: regulation of gluconeogenesis (GO:0006111);; Biological Process: regulation of pH (GO:0006885);; Biological Proce…	K00898|0|fpg:101915736|K00898 pyruvate dehydrogenase kinase 2/3/4 [EC:2.7.11.2] | (RefSeq) PDK2; pyruvate dehydrogenase kinase 2	--	[T]	Signal transduction mechanisms	Mitochondrial branched-chain alpha-ketoacid dehydrogenase kinase;; Histidine kinase-, DNA gyrase B-, and HSP90-like ATPase	--	T	Signal transduction mechanisms	PREDICTED: pyruvate dehydrogenase kinase, isozyme 2 [Cuculus canorus]
gene24910	688	326	549	767	538	2204	1586	1633	1063	1090	15.1171	6.92313	14.9433	15.5355	11.6685	58.654	32.6404	32.1249	26.5948	23.0643	0.000314177	1.93895	up	--	--	Cellular Component: cytoplasm (GO:0005737);; Biological Process: lipid metabolic process (GO:0006629);; Cellular Component: integral component of membrane (GO:0016021);; Molecular Function: oxidoreductase activity, acting on the CH-CH group of donors (GO:0016627);; Biological Process: oxidation-reduction process (GO:0055114);;	K10258|9.92669e-55|ptg:102959844|K10258 very-long-chain enoyl-CoA reductase [EC:1.3.1.93] | (RefSeq) TECR; trans-2,3-enoyl-CoA reductase	Fatty acid elongation (ko00062);; Biosynthesis of unsaturated fatty acids (ko01040);; Fatty acid metabolism (ko01212)	[I]	Lipid transport and metabolism	--	--	I	Lipid transport and metabolism	PREDICTED: very-long-chain enoyl-CoA reductase isoform X2 [Chrysemys picta bellii]
gene25346	285	217	354	375	287	354	648	421	468	643	4.03718	2.92506	4.64146	3.99393	3.35312	6.10981	8.22598	6.19637	7.06367	8.42618	0.00631078	1.23349	up	[F]	Nucleotide transport and metabolism	Biological Process: purine nucleotide catabolic process (GO:0006195);; Biological Process: purine nucleoside diphosphate catabolic process (GO:0009137);; Molecular Function: nucleoside-diphosphatase activity (GO:0017110);; Biological Process: carbohydrate derivative catabolic process (GO:1901136);;	K17817|1.27478e-101|fpg:101919411|K17817 8-oxo-dGDP phosphatase [EC:3.6.1.58] | (RefSeq) NUDT18; nudix hydrolase 18	--	[T]	Signal transduction mechanisms	NUDIX domain	8-oxo-dGDP phosphatase NUDT18 GN=nudt18 OS=Danio rerio (Zebrafish) PE=2 SV=1	L	Replication, recombination and repair	PREDICTED: 8-oxo-dGDP phosphatase NUDT18 [Haliaeetus leucocephalus]
gene2537	742	671	700	1369	1092	206	306	217	208	313	5.08918	4.15428	4.31433	7.23083	7.21943	1.62962	1.84057	1.49088	1.6738	2.0897	0.000780441	-1.37421	down	--	--	Biological Process: arginine metabolic process (GO:0006525);; Biological Process: transport (GO:0006810);; Cellular Component: integral component of membrane (GO:0016021);;	K15101|1.10801e-171|gga:418886|K15101 solute carrier family 25 (mitochondrial ornithine transporter) member 2/15 | (RefSeq) SLC25A15; solute carrier family 25 member 15	--	[C]	Energy production and conversion	Mitochondrial carrier protein	Solute carrier family 25 member 48 GN=slc25a48 OS=Danio rerio (Zebrafish) PE=2 SV=1	C	Energy production and conversion	mitochondrial ornithine transporter 1 [Gallus gallus]
gene25417	62199	33912	83373	58526	29992	207530	234364	223861	168847	173682	1414.02	703.107	1361.34	839.439	848.438	4787.49	3970.48	4040.37	4261.58	3917.16	2.48543e-13	2.44019	up	[G]	Carbohydrate transport and metabolism	Biological Process: somitogenesis (GO:0001756);; Biological Process: thigmotaxis (GO:0001966);; Molecular Function: fructose-bisphosphate aldolase activity (GO:0004332);; Biological Process: glycolytic process (GO:0006096);; Biological Process: axonogenesis (GO:0007409);; Biological Process: brain development (GO:0007420);; Biological Process: pigmentation (GO:0043473);;	K01623|2.30982e-81|fch:102049098|K01623 fructose-bisphosphate aldolase, class I [EC:4.1.2.13] | (RefSeq) ALDOA; fructose-bisphosphate aldolase A	Glycolysis / Gluconeogenesis (ko00010);; Pentose phosphate pathway (ko00030);; Fructose and mannose metabolism (ko00051);; Carbon metabolism (ko01200);; Biosynthesis of amino acids (ko01230)	[G]	Carbohydrate transport and metabolism	Fructose-bisphosphate aldolase class-I	Fructose-bisphosphate aldolase C GN=aldoc OS=Carassius auratus (Goldfish) PE=2 SV=2	G	Carbohydrate transport and metabolism	PREDICTED: fructose-bisphosphate aldolase A [Falco cherrug]
gene25608	14409	9885	16958	15832	12019	39666	50721	35668	34190	31246	657.285	258.335	696.529	584.895	550.029	2133.5	2000.7	1636.54	1872.16	1439.71	1.86047e-09	1.99126	up	[G]	Carbohydrate transport and metabolism	Biological Process: carbohydrate metabolic process (GO:0005975);; Molecular Function: glycogen phosphorylase activity (GO:0008184);; Molecular Function: pyridoxal phosphate binding (GO:0030170);;	K00688|1.73088e-60|ssc:733659|K00688 glycogen phosphorylase [EC:2.4.1.1] | (RefSeq) PYGM; glycogen phosphorylase, muscle associated	Starch and sucrose metabolism (ko00500);; Insulin signaling pathway (ko04910);; Glucagon signaling pathway (ko04922);; Insulin resistance (ko04931)	[G]	Carbohydrate transport and metabolism	Carbohydrate phosphorylase	--	G	Carbohydrate transport and metabolism	PREDICTED: glycogen phosphorylase, muscle form [Pseudopodoces humilis]
gene25611	921	1016	1155	1503	1131	1717	2959	2389	1094	1709	15.4402	15.5194	18.6795	19.9249	18.5198	33.9272	44.5315	40.3019	24.9521	28.8064	0.000219037	1.2791	up	--	--	--	K20225|1.59759e-72|asn:102374960|K20225 capicua transcriptional repressor | (RefSeq) CIC; capicua transcriptional repressor	--	[K]	Transcription	--	--	K	Transcription	PREDICTED: protein capicua homolog [Alligator sinensis]
gene25692	442	552	382	441	431	625	491	913	656	678	7.7733	8.85137	6.05717	6.13748	7.41055	12.9844	7.48336	15.9966	13.6118	11.8377	0.0090335	1.10145	up	[O]	Posttranslational modification, protein turnover, chaperones	--	K09507|9.84433e-168|gga:100858808|K09507 DnaJ homolog subfamily B member 1 | (RefSeq) DNAJB1; DnaJ heat shock protein family (Hsp40) member B1	Protein processing in endoplasmic reticulum (ko04141);; Influenza A (ko05164)	[O]	Posttranslational modification, protein turnover, chaperones	DnaJ C terminal domain	--	O	Posttranslational modification, protein turnover, chaperones	PREDICTED: dnaJ homolog subfamily B member 1-like, partial [Gallus gallus]
gene25762	306	216	312	230	339	491	522	470	347	386	7.11161	4.44581	6.47569	4.01201	7.76216	13.8455	10.5092	10.9377	9.47375	9.12276	0.0174299	1.15742	up	--	--	Molecular Function: protein phosphatase inhibitor activity (GO:0004864);; Biological Process: negative regulation of phosphatase activity (GO:0010923);; Molecular Function: phosphatase binding (GO:0019902);;	K17576|1.01338e-139|asn:102377281|K17576 protein phosphatase 1 regulatory subunit 37 | (RefSeq) PPP1R37; protein phosphatase 1 regulatory subunit 37	--	[A]	RNA processing and modification	--	Protein phosphatase 1 regulatory subunit 37 GN=ppp1r37 OS=Danio rerio (Zebrafish) PE=2 SV=1	T	Signal transduction mechanisms	PREDICTED: protein phosphatase 1 regulatory subunit 37 isoform X1 [Haliaeetus leucocephalus]
gene2582	49	56	50	25	51	50	207	83	86	78	0.618435	0.658381	0.64768	0.283143	0.786573	0.820371	2.92143	1.10314	1.38263	0.990901	0.0291076	1.57098	up	--	--	Cellular Component: cytoplasm (GO:0005737);;	K18762|2.43049e-173|gga:771155|K18762 zygote arrest protein 1 | (RefSeq) ZAR1L, ZAR1; zygote arrest 1-like	--	--	--	Zinc-binding domain	Zygote arrest protein 1 GN=zar1 OS=Xenopus laevis (African clawed frog) PE=2 SV=1	S	Function unknown	ZAR1-like protein [Gallus gallus]
gene25858	159877	145290	151663	206960	110346	395663	366078	407844	311836	401797	3304.19	2878.34	3671.48	4109.52	2860.42	11401.8	8884.72	12220.5	8930.5	10117	8.33315e-08	1.80877	up	[G]	Carbohydrate transport and metabolism	Cellular Component: phosphopyruvate hydratase complex (GO:0000015);; Molecular Function: magnesium ion binding (GO:0000287);; Cellular Component: photoreceptor inner segment (GO:0001917);; Molecular Function: phosphopyruvate hydratase activity (GO:0004634);; Biological Process: gluconeogenesis (GO:0006094);; Biological Process: glycolytic process (GO:0006096);; Cellular Component: perikaryon (GO:…	K01689|0|gga:396016|K01689 enolase [EC:4.2.1.11] | (RefSeq) ENO3; enolase 3 (beta, muscle)	Glycolysis / Gluconeogenesis (ko00010);; Carbon metabolism (ko01200);; Biosynthesis of amino acids (ko01230);; RNA degradation (ko03018)	[G]	Carbohydrate transport and metabolism	Enolase, C-terminal TIM barrel domain;; Enolase, N-terminal domain	Beta-enolase GN=ENO3 OS=Gallus gallus (Chicken) PE=1 SV=3	G	Carbohydrate transport and metabolism	beta-enolase [Gallus gallus]
gene25871	12151	8447	14850	14198	11316	34321	44500	31476	28913	26310	533.287	337.918	586.628	492.676	485.24	1775.87	1690.98	1374.4	1496.15	1144.81	2.49469e-09	1.9613	up	[G]	Carbohydrate transport and metabolism	Biological Process: carbohydrate metabolic process (GO:0005975);; Molecular Function: glycogen phosphorylase activity (GO:0008184);; Molecular Function: pyridoxal phosphate binding (GO:0030170);;	K00688|2.61645e-78|phi:102103403|K00688 glycogen phosphorylase [EC:2.4.1.1] | (RefSeq) PYGM; glycogen phosphorylase, muscle associated	Starch and sucrose metabolism (ko00500);; Insulin signaling pathway (ko04910)	[G]	Carbohydrate transport and metabolism	Carbohydrate phosphorylase	--	G	Carbohydrate transport and metabolism	PREDICTED: glycogen phosphorylase, muscle form-like, partial [Haliaeetus leucocephalus]
gene25911	4187	3136	4875	5469	4263	7404	10715	9616	8939	7879	99.9812	75.8138	104.774	103.236	110.592	208.369	221.469	254.61	279.811	207.34	7.29831e-07	1.5437	up	[M]	Cell wall/membrane/envelope biogenesis	Molecular Function: glycogen (starch) synthase activity (GO:0004373);; Cellular Component: cytoplasm (GO:0005737);; Biological Process: glycogen biosynthetic process (GO:0005978);; Biological Process: heart development (GO:0007507);; Cellular Component: inclusion body (GO:0016234);; Molecular Function: protein kinase binding (GO:0019901);;	--	--	[G]	Carbohydrate transport and metabolism	Glycogen synthase	--	G	Carbohydrate transport and metabolism	PREDICTED: glycogen [starch] synthase, muscle [Alligator mississippiensis]
gene25922	8842	6030	10032	8605	7881	23009	30876	21303	18814	18587	305.971	190.115	312.351	254.549	266.309	964.054	924.698	733.312	853.995	637.377	1.07693e-09	1.95245	up	[G]	Carbohydrate transport and metabolism	--	K00688|7.79507e-54|pbi:103066309|K00688 glycogen phosphorylase [EC:2.4.1.1] | (RefSeq) PYGM; glycogen phosphorylase, muscle associated	Starch and sucrose metabolism (ko00500);; Insulin signaling pathway (ko04910)	[G]	Carbohydrate transport and metabolism	Carbohydrate phosphorylase	--	G	Carbohydrate transport and metabolism	PREDICTED: glycogen phosphorylase, muscle form [Python bivittatus]
gene26230	89	9	39	0	0	40	86	85	55	122	1.80076	0.164064	0.714235	0	0	0.938093	1.50772	1.71867	1.31664	2.46008	0.00388177	1.89818	up	[P]	Inorganic ion transport and metabolism	--	K04889|4.17968e-138|gga:100859454|K04889 potassium voltage-gated channel Shaw-related subfamily C member 3 | (RefSeq) potassium voltage-gated channel subfamily C member 3-like	--	[P]	Inorganic ion transport and metabolism	Ion transport protein;; Ion channel	Potassium voltage-gated channel subfamily A member 2 GN=kcna2 OS=Oncorhynchus mykiss (Rainbow trout) PE=2 SV=1	P	Inorganic ion transport and metabolism	PREDICTED: potassium voltage-gated channel subfamily C member 3-like, partial [Gallus gallus]
gene26239	625	655	425	1165	488	210	194	271	0	0	10.654	10.7939	7.02264	16.2422	7.69385	4.47341	2.82194	4.3375	0	0	0.00346341	-1.7715	down	--	--	Molecular Function: transcription corepressor activity (GO:0003714);; Molecular Function: metallocarboxypeptidase activity (GO:0004181);; Cellular Component: extracellular space (GO:0005615);; Biological Process: regulation of transcription, DNA-templated (GO:0006355);; Biological Process: proteolysis (GO:0006508);; Biological Process: cell adhesion (GO:0007155);; Molecular Function: zinc ion bin…	--	--	[R]	General function prediction only	Zinc carboxypeptidase;; F5/8 type C domain	Carboxypeptidase D (Fragment) GN=CPD OS=Lophonetta specularioides (Crested duck) PE=1 SV=1	R	General function prediction only	PREDICTED: adipocyte enhancer-binding protein 1, partial [Meleagris gallopavo]
gene263	3095	3296	3144	3201	3321	5921	7289	6201	5171	5010	10.9766	9.69676	8.6817	9.79153	12.1034	26.388	23.267	22.6132	18.8494	16.7825	3.33715e-06	1.39132	up	--	--	--	--	--	--	--	GRAM domain;; Plant phosphoribosyltransferase C-terminal	GRAM domain-containing protein 4 GN=gramd4 OS=Xenopus laevis (African clawed frog) PE=2 SV=1	S	Function unknown	PREDICTED: GRAM domain-containing protein 4 isoform X2 [Gallus gallus]
gene26307	863	305	861	549	834	1087	1380	1242	771	689	33.9914	10.9201	30.5251	17.0863	32.0728	50.4851	47.0709	48.6549	35.7829	26.8826	0.00706008	1.09345	up	--	--	--	K04845|2.15531e-40|pss:102452062|K04845 voltage-gated sodium channel type I beta | (RefSeq) SCN1B; sodium voltage-gated channel beta subunit 1	Adrenergic signaling in cardiomyocytes (ko04261)	--	--	--	--	P	Inorganic ion transport and metabolism	PREDICTED: sodium channel subunit beta-1 [Chrysemys picta bellii]
gene2637	4507	2448	5889	3934	4185	9482	11566	13827	5115	3474	5.58698	2.77192	6.53563	3.86015	5.06427	13.896	12.4527	17.0684	7.46452	4.34224	0.0274313	1.5674	up	--	--	Molecular Function: ATP binding (GO:0005524);;	K17592|0|gga:418944|K17592 sacsin | (RefSeq) SACS; sacsin molecular chaperone	--	--	--	HEPN domain;; Ubiquitin family	--	O	Posttranslational modification, protein turnover, chaperones	PREDICTED: sacsin isoform X6 [Gallus gallus]
gene26487	907	892	1071	1479	1014	1801	2422	1989	1982	1757	34.2138	30.6567	36.3383	44.097	37.3496	80.0793	79.107	74.641	88.1534	65.6793	9.852e-07	1.42139	up	[M]	Cell wall/membrane/envelope biogenesis	Molecular Function: glycogen (starch) synthase activity (GO:0004373);; Cellular Component: cytoplasm (GO:0005737);; Biological Process: glycogen biosynthetic process (GO:0005978);; Biological Process: heart development (GO:0007507);; Cellular Component: inclusion body (GO:0016234);; Molecular Function: protein kinase binding (GO:0019901);;	K00693|2.11609e-44|asn:102372928|K00693 glycogen synthase [EC:2.4.1.11] | (RefSeq) GYS1; glycogen synthase 1	Starch and sucrose metabolism (ko00500);; Insulin signaling pathway (ko04910)	[G]	Carbohydrate transport and metabolism	Glycogen synthase	--	G	Carbohydrate transport and metabolism	glycogen synthase, partial [Gallus gallus]
gene2651	2054	2014	1862	1443	1287	5080	9585	6551	3802	4569	12.9703	11.5899	10.5811	7.20624	7.93882	37.8264	52.4192	41.1651	28.3116	28.6098	2.16453e-08	2.25159	up	[I]	Lipid transport and metabolism	--	K13247|0|mgp:100551040|K13247 L-gulonate 3-dehydrogenase [EC:1.1.1.45] | (RefSeq) CRYL1; crystallin lambda 1	Pentose and glucuronate interconversions (ko00040)	[I]	Lipid transport and metabolism	3-hydroxyacyl-CoA dehydrogenase, NAD binding domain;; 3-hydroxyacyl-CoA dehydrogenase, C-terminal domain;; NAD-dependent glycerol-3-phosphate dehydrogenase N-terminus;; UDP-glucose/GDP-mannose dehydrogenase family, NAD binding domain;; Pyridine nucleotide-disulphide oxidoreductase	--	I	Lipid transport and metabolism	Lambda-crystallin-like protein, partial [Anas platyrhynchos]
gene26513	243	247	397	399	203	28	44	70	62	148	3.47414	3.22302	5.12447	4.5275	2.83355	0.463532	0.539572	0.991369	1.04316	2.09271	0.0109086	-1.5993	down	--	--	--	K09677|1.01368e-88|pss:102460118|K09677 galactose-3-O-sulfotransferase 4 [EC:2.8.2.-] | (RefSeq) GAL3ST4; galactose-3-O-sulfotransferase 4	--	--	--	Galactose-3-O-sulfotransferase	--	R	General function prediction only	PREDICTED: LOW QUALITY PROTEIN: galactose-3-O-sulfotransferase 4, partial [Meleagris gallopavo]
gene2653	52	67	72	0	9	242	720	507	67	162	0.486439	0.540634	0.625554	0	0.077129	2.79371	6.0537	4.89989	0.758503	1.54748	0.00669469	3.52198	up	--	--	Cellular Component: connexin complex (GO:0005922);; Biological Process: cell communication (GO:0007154);; Biological Process: sensory perception of sound (GO:0007605);; Cellular Component: integral component of membrane (GO:0016021);;	K07625|0|gga:395771|K07625 gap junction protein, beta 6 | (RefSeq) GJB6, CX31; gap junction protein beta 6	--	--	--	Connexin;; Gap junction channel protein cysteine-rich domain	Gap junction beta-6 protein GN=GJB6 OS=Gallus gallus (Chicken) PE=2 SV=1	T	Signal transduction mechanisms	gap junction beta-6 protein [Gallus gallus]
gene26562	380	322	427	423	428	624	1071	800	373	559	19.8572	15.3196	20.0861	17.4959	21.876	38.4759	48.5051	41.6443	22.9805	28.9537	0.00114745	1.27282	up	--	--	--	K20225|2.59405e-41|amj:102558185|K20225 capicua transcriptional repressor | (RefSeq) protein capicua homolog	--	[K]	Transcription	HMG (high mobility group) box	Transcription factor Sox-6 {ECO:0000312|EMBL:AAI61247.1} GN=sox6 OS=Xenopus tropicalis (Western clawed frog) PE=2 SV=1	K	Transcription	PREDICTED: protein capicua homolog, partial [Cuculus canorus]
gene2667	386	516	531	339	582	156	149	172	57	168	0.971135	1.18127	1.19881	0.669882	1.39257	0.457471	0.314336	0.412453	0.162315	0.402428	0.0225751	-1.2747	down	--	--	Molecular Function: metal ion binding (GO:0046872);;	K18668|0|gga:418963|K18668 ribonuclease ZC3H12 [EC:3.1.-.-] | (RefSeq) ZC3H12C; zinc finger CCCH-type containing 12C	--	[S]	Function unknown	Zc3h12a-like Ribonuclease NYN domain	NEDD4-binding protein 1 GN=n4bp1 OS=Xenopus laevis (African clawed frog) PE=2 SV=1	S	Function unknown	PREDICTED: probable ribonuclease ZC3H12C isoform X6 [Gallus gallus]
gene2671	2029	4009	2392	2782	1762	603	568	717	492	1263	7.47398	13.4797	8.12311	8.56	6.5112	2.49693	1.87818	2.76414	2.15924	4.74033	0.00183775	-1.34822	down	--	--	--	--	--	[R]	General function prediction only	Glycosyl transferase family 90;; Filamin/ABP280 repeat	KDEL motif-containing protein 1 (Precursor) GN=kdelc1 OS=Danio rerio (Zebrafish) PE=2 SV=1	R	General function prediction only	PREDICTED: KDEL motif-containing protein 2 [Ficedula albicollis]
gene273	1784	1431	1832	2080	1568	2429	4225	2908	2267	1768	8.02697	5.86781	7.38024	7.34652	6.87956	12.9018	16.4138	12.9634	11.9987	7.91014	0.000933969	1.15533	up	--	--	Molecular Function: DNA binding (GO:0003677);; Cellular Component: nucleus (GO:0005634);; Cellular Component: cytoplasm (GO:0005737);; Molecular Function: protein dimerization activity (GO:0046983);;	--	--	[L]	Replication, recombination and repair	BED zinc finger;; hAT family C-terminal dimerisation region	--	L	Replication, recombination and repair	zinc finger BED domain-containing protein 4 [Gallus gallus]
gene2732	1866	1643	1916	1645	1812	748	670	558	385	805	7.17035	5.75279	6.6261	4.99692	6.80451	3.38634	2.22647	2.13221	1.7428	3.06642	0.00313388	-1.00069	down	--	--	--	K15049|0|gga:428090|K15049 endonuclease domain-containing 1 protein | (RefSeq) ENDOD1; endonuclease domain containing 1	--	--	--	DNA/RNA non-specific endonuclease	--	R	General function prediction only	PREDICTED: endonuclease domain-containing 1 protein [Gallus gallus]
gene2741	115	223	327	191	206	36	66	43	41	85	0.630903	1.09659	1.5814	0.830598	1.17095	0.23251	0.323305	0.228629	0.268774	0.440557	0.0323396	-1.49451	down	--	--	--	K03443|0|mgp:100548127|K03443 pannexin 1 | (RefSeq) PANX1; pannexin 1	--	--	--	Innexin	--	P	Inorganic ion transport and metabolism	PREDICTED: pannexin-1 [Ficedula albicollis]
gene2823	1827	2364	2396	1782	2155	557	468	782	493	427	10.2929	13.1899	11.3287	7.62144	10.7866	3.43324	2.28929	4.07055	2.69001	1.67546	1.13979e-06	-1.42219	down	[RTKL]	General function prediction only;; Signal transduction mechanisms;; Transcription;; Replication, recombination and repair	Cellular Component: ruffle (GO:0001726);; Molecular Function: protein serine/threonine kinase activity (GO:0004674);; Molecular Function: collagen binding (GO:0005518);; Molecular Function: ATP binding (GO:0005524);; Cellular Component: nucleus (GO:0005634);; Cellular Component: Golgi apparatus (GO:0005794);; Cellular Component: cell-cell junction (GO:0005911);; Biological Process: neuromuscular …	K04409|0|gga:419083|K04409 p21-activated kinase 1 [EC:2.7.11.1] | (RefSeq) PAK1; p21 (RAC1) activated kinase 1	MAPK signaling pathway (ko04010);; ErbB signaling pathway (ko04012);; Focal adhesion (ko04510);; Regulation of actin cytoskeleton (ko04810)	[T]	Signal transduction mechanisms	Protein kinase domain;; Protein tyrosine kinase;; P21-Rho-binding domain;; Kinase-like	Serine/threonine-protein kinase PAK 3 GN=pak3 OS=Xenopus laevis (African clawed frog) PE=2 SV=1	T	Signal transduction mechanisms	serine/threonine-protein kinase PAK 1 [Gallus gallus]
gene2885	556	2904	1062	2715	1901	207	505	391	500	264	18.8646	89.993	32.4335	72.9644	63.169	8.25254	14.834	13.2737	19.9898	8.86127	0.0271034	-1.7457	down	--	--	Molecular Function: oxygen transporter activity (GO:0005344);; Molecular Function: iron ion binding (GO:0005506);; Cellular Component: hemoglobin complex (GO:0005833);; Biological Process: oxygen transport (GO:0015671);; Molecular Function: oxygen binding (GO:0019825);; Molecular Function: heme binding (GO:0020037);; Molecular Function: hemoglobin binding (GO:0030492);;	--	--	[C]	Energy production and conversion	Globin	Hemoglobin subunit beta GN=HBB OS=Gallus gallus (Chicken) PE=1 SV=2	C	Energy production and conversion	hemoglobin subunit beta [Gallus gallus]
gene292	1632	1274	1486	1527	1424	2455	3124	1794	1616	1821	6.52761	4.64115	5.34836	4.83079	5.60641	11.581	10.8205	7.14202	7.62126	7.22402	0.000659132	1.05911	up	[S]	Function unknown	--	--	--	[S]	Function unknown	Uncharacterized ACR, YdiU/UPF0061 family	Selenoprotein O GN=selo OS=Danio rerio (Zebrafish) PE=3 SV=2	S	Function unknown	selenoprotein O [Gallus gallus]
gene2920	563	532	591	643	415	97	124	175	89	295	2.81849	2.30198	2.49275	2.71063	1.93904	0.518438	0.547193	0.797227	0.45833	1.40811	0.0105042	-1.35435	down	[C]	Energy production and conversion	Molecular Function: protein binding (GO:0005515);; Biological Process: glycerol metabolic process (GO:0006071);; Biological Process: lipid metabolic process (GO:0006629);; Molecular Function: glycerophosphodiester phosphodiesterase activity (GO:0008889);; Cellular Component: endomembrane system (GO:0012505);; Cellular Component: integral component of membrane (GO:0016021);; Biological Process: sp…	--	--	[C]	Energy production and conversion	Glycerophosphoryl diester phosphodiesterase family	Glycerophosphodiester phosphodiesterase domain-containing protein 5 GN=GDPD5 OS=Gallus gallus (Chicken) PE=1 SV=1	C	Energy production and conversion	glycerophosphodiester phosphodiesterase domain-containing protein 5 [Gallus gallus]
gene2954	2845	2283	3225	2026	2483	9356	14931	10529	7881	6516	10.708	7.83162	10.9257	6.02661	9.13003	41.5182	48.658	39.4291	34.9748	24.3141	6.55133e-11	2.43267	up	[G]	Carbohydrate transport and metabolism	--	K11809|0|gga:419052|K11809 glucose-1,6-bisphosphate synthase [EC:2.7.1.106] | (RefSeq) PGM2L1; phosphoglucomutase 2 like 1	Starch and sucrose metabolism (ko00500)	[G]	Carbohydrate transport and metabolism	Phosphoglucomutase/phosphomannomutase, alpha/beta/alpha domain I;; Phosphoglucomutase/phosphomannomutase, alpha/beta/alpha domain II;; Phosphoglucomutase/phosphomannomutase, alpha/beta/alpha domain III;; Phosphoglucomutase/phosphomannomutase, C-terminal domain	--	G	Carbohydrate transport and metabolism	PREDICTED: glucose 1,6-bisphosphate synthase [Gallus gallus]
gene3070	263	150	163	231	46	5	16	0	0	6	3.57471	2.04772	2.3925	3.01105	0.573693	0.099883	0.232176	0	0	0.087729	6.41117e-07	-4.57683	down	--	--	Biological Process: negative regulation of transcription from RNA polymerase II promoter (GO:0000122);; Biological Process: positive regulation of cell-matrix adhesion (GO:0001954);; Molecular Function: low-density lipoprotein receptor activity (GO:0005041);; Cellular Component: Golgi apparatus (GO:0005794);; Biological Process: phagocytosis, recognition (GO:0006910);; Biological Process: cell su…	K06259|0|gga:417730|K06259 CD36 antigen | (RefSeq) CD36; CD36 molecule	PPAR signaling pathway (ko03320);; Phagosome (ko04145);; ECM-receptor interaction (ko04512);; Adipocytokine signaling pathway (ko04920)	[T]	Signal transduction mechanisms	CD36 family	--	T	Signal transduction mechanisms	platelet glycoprotein 4 [Gallus gallus]
gene312	2201	1044	1104	3506	8051	20	81	6	60	75	20.9286	9.11527	9.42602	25.9107	72.2695	0.203008	0.645724	0.040594	0.620109	0.687868	0.00871247	-5.61267	down	--	--	Molecular Function: actin binding (GO:0003779);; Molecular Function: tropomyosin binding (GO:0005523);; Cellular Component: cytoskeleton (GO:0005856);;	--	--	[Z]	Cytoskeleton	Tropomodulin	--	Z	Cytoskeleton	leiomodin-2 [Gallus gallus]
gene3182	206	382	789	951	1372	0	11	1	31	0	3.90148	6.61076	13.4779	14.2734	25.4607	0	0.17778	0.012332	0.686453	0	3.72724e-06	-5.77812	down	[C]	Energy production and conversion	Molecular Function: L-lactate dehydrogenase activity (GO:0004459);; Molecular Function: structural constituent of eye lens (GO:0005212);; Cellular Component: cytosol (GO:0005829);; Biological Process: pyruvate metabolic process (GO:0006090);; Biological Process: glycolytic process (GO:0006096);; Biological Process: cellular carbohydrate metabolic process (GO:0044262);; Biological Process: oxidati…	K00016|3.96143e-158|gga:373997|K00016 L-lactate dehydrogenase [EC:1.1.1.27] | (RefSeq) LDHB; lactate dehydrogenase B	Glycolysis / Gluconeogenesis (ko00010);; Cysteine and methionine metabolism (ko00270);; Pyruvate metabolism (ko00620);; Propanoate metabolism (ko00640)	[C]	Energy production and conversion	lactate/malate dehydrogenase, NAD binding domain;; lactate/malate dehydrogenase, alpha/beta C-terminal domain;; Family 4 glycosyl hydrolase	L-lactate dehydrogenase B chain GN=LDHB OS=Gallus gallus (Chicken) PE=1 SV=3	C	Energy production and conversion	L-lactate dehydrogenase B chain [Gallus gallus]
gene326	691	1082	659	642	680	165	129	202	171	241	2.46348	3.4587	3.76136	1.8254	2.31352	0.642879	0.368715	0.674355	0.671345	0.812025	0.000322832	-1.54362	down	--	--	--	--	--	--	--	GDSL/SGNH-like Acyl-Esterase family found in Pmr5 and Cas1p;; Cadherin-like beta sandwich domain	--	S	Function unknown	PREDICTED: cadherin-like and PC-esterase domain containing 1 isoform X5 [Gallus gallus]
gene334	1047	1011	1496	1227	1084	5954	8415	7587	5197	4386	3.32278	3.45652	4.06552	3.0328	3.60921	21.071	23.3068	24.6561	19.4131	13.7004	8.61501e-19	2.94473	up	[R]	General function prediction only	--	--	--	--	--	Cortactin-binding protein-2;; Ankyrin repeats (3 copies);; Ankyrin repeat;; Ankyrin repeats (many copies);; Ankyrin repeats (many copies);; Ankyrin repeat	Neuron navigator 3 GN=nav3 OS=Danio rerio (Zebrafish) PE=3 SV=1	R	General function prediction only	cortactin-binding protein 2 [Gallus gallus]
gene3361	6217	7423	6460	7652	5586	22181	35906	22522	17688	19722	46.7502	50.5749	43.8345	45.8854	40.8097	201.719	239.123	169.723	160.416	150.757	1.33513e-13	2.32574	up	--	--	Molecular Function: ATP binding (GO:0005524);; Cellular Component: mitochondrion (GO:0005739);; Biological Process: obsolete ATP catabolic process (GO:0006200);; Molecular Function: ATPase activity (GO:0016887);;	K06185|0|gga:426038|K06185 ATP-binding cassette, subfamily F, member 2 | (RefSeq) ABCF2; ATP binding cassette subfamily F member 2	--	[R]	General function prediction only	ABC transporter;; ABC transporter;; AAA domain;; P-loop containing region of AAA domain;; AAA domain;; Miro-like protein;; Protein of unknown function (DUF1602);; Protein of unknown function (DUF1602)	--	R	General function prediction only	ATP-binding cassette sub-family F member 2 [Gallus gallus]
gene3364	4472	2149	5381	5860	6730	6796	9284	7754	6261	6552	19.2471	7.23801	13.9838	18.2652	26.2844	33.2489	26.0041	30.6133	29.6332	24.8073	0.00104033	1.07923	up	[R]	General function prediction only	Biological Process: protein ubiquitination (GO:0016567);; Biological Process: intracellular signal transduction (GO:0035556);;	K10332|0|gga:768438|K10332 ankyrin repeat and SOCS box protein 10 | (RefSeq) ASB10; ankyrin repeat and SOCS box containing 10	--	[R]	General function prediction only	Ankyrin repeats (3 copies);; Ankyrin repeat;; Ankyrin repeats (many copies);; Ankyrin repeats (many copies);; Ankyrin repeat;; SOCS box	Serine/threonine-protein phosphatase 6 regulatory ankyrin repeat subunit B GN=ANKRD44 OS=Gallus gallus (Chicken) PE=2 SV=1	R	General function prediction only	PREDICTED: ankyrin repeat and SOCS box protein 10 isoform X1 [Gallus gallus]
gene3372	1911	1086	624	2845	1411	129	214	156	148	278	10.2306	5.05027	2.84747	12.2151	6.7921	1.02588	0.878089	0.731904	1.23393	1.2973	0.000458705	-2.60525	down	[T]	Signal transduction mechanisms	Molecular Function: ion channel activity (GO:0005216);; Biological Process: ion transport (GO:0006811);; Cellular Component: membrane (GO:0016020);;	K04905|0|fch:102057188|K04905 potassium voltage-gated channel Eag-related subfamily H member 2 | (RefSeq) KCNH2; potassium voltage-gated channel subfamily H member 2	--	[PT]	Inorganic ion transport and metabolism;; Signal transduction mechanisms	Ion transport protein;; PAS domain;; Cyclic nucleotide-binding domain;; Ion channel;; PAS fold;; PAS fold	Potassium voltage-gated channel subfamily H member 2 (Fragment) GN=KCNH2 OS=Gallus gallus (Chicken) PE=2 SV=1	P	Inorganic ion transport and metabolism	PREDICTED: potassium voltage-gated channel subfamily H member 2 [Falco cherrug]
gene3483	447	311	595	473	913	1157	1577	1238	820	1230	4.10322	2.62714	4.71598	3.34459	7.76588	11.6311	11.7307	10.508	8.49448	10.6786	1.62078e-07	1.60927	up	--	--	Molecular Function: hormone activity (GO:0005179);; Cellular Component: endoplasmic reticulum (GO:0005783);; Cellular Component: Golgi apparatus (GO:0005794);; Cellular Component: plasma membrane (GO:0005886);; Biological Process: G-protein coupled receptor signaling pathway (GO:0007186);; Cellular Component: cell surface (GO:0009986);; Molecular Function: corticotrophin-releasing factor receptor…	K04579|0|gga:395105|K04579 corticotropin releasing hormone receptor 2 | (RefSeq) CRHR2, CRH-R2; corticotropin releasing hormone receptor 2	Neuroactive ligand-receptor interaction (ko04080)	[T]	Signal transduction mechanisms	7 transmembrane receptor (Secretin family);; Hormone receptor domain	Corticotropin-releasing factor receptor 2 GN=crhr2 OS=Xenopus laevis (African clawed frog) PE=2 SV=1	T	Signal transduction mechanisms	PREDICTED: corticotropin-releasing factor receptor 2 isoform X1 [Meleagris gallopavo]
gene35	1897	1570	1893	2336	1743	3879	5439	3334	2724	3108	10.4495	7.90475	9.37545	10.17	9.37778	25.7926	25.5861	18.117	17.7023	16.643	1.56914e-07	1.47641	up	[H]	Coenzyme transport and metabolism	Molecular Function: adenosylhomocysteinase activity (GO:0004013);; Biological Process: one-carbon metabolic process (GO:0006730);;	K01251|0|hsa:23382|K01251 adenosylhomocysteinase [EC:3.3.1.1] | (RefSeq) AHCYL2, ADOHCYASE3, IRBIT2; adenosylhomocysteinase like 2	Cysteine and methionine metabolism (ko00270)	[H]	Coenzyme transport and metabolism	S-adenosyl-L-homocysteine hydrolase;; S-adenosyl-L-homocysteine hydrolase, NAD binding domain;; D-isomer specific 2-hydroxyacid dehydrogenase, NAD binding domain;; Tetrahydrofolate dehydrogenase/cyclohydrolase, NAD(P)-binding domain	Adenosylhomocysteinase A GN=ahcy-a OS=Xenopus laevis (African clawed frog) PE=2 SV=1	H	Coenzyme transport and metabolism	PREDICTED: putative adenosylhomocysteinase 3 isoform X1 [Haliaeetus leucocephalus]
gene351	16798	13738	17286	6528	16247	31716	29201	40023	26473	16078	46.359	37.1799	52.6704	21.9649	42.0063	115.489	36.2712	111.431	85.8534	42.2705	0.00128613	1.5348	up	--	--	--	K07189|0|gga:101747406|K07189 protein phosphatase 1 regulatory subunit 3A/B/C/D/E | (RefSeq) PPP1R3A, null; protein phosphatase 1 regulatory subunit 3A	Insulin signaling pathway (ko04910)	[OT]	Posttranslational modification, protein turnover, chaperones;; Signal transduction mechanisms	Putative phosphatase regulatory subunit	Protein phosphatase 1 regulatory subunit 3C-B GN=ppp1r3cb OS=Danio rerio (Zebrafish) PE=2 SV=1	T	Signal transduction mechanisms	PREDICTED: protein phosphatase 1 regulatory subunit 3A [Gallus gallus]
gene3532	7736	4299	5401	7448	3876	21731	17807	20620	13675	17149	50.9267	25.7899	31.9976	38.7569	24.9009	168.637	101.484	135.037	106.077	111.901	4.28778e-12	2.18557	up	--	--	Biological Process: triglyceride metabolic process (GO:0006641);; Biological Process: cholesterol biosynthetic process (GO:0006695);; Biological Process: negative regulation of steroid biosynthetic process (GO:0010894);; Biological Process: SREBP signaling pathway (GO:0032933);; Cellular Component: SREBP-SCAP-Insig complex (GO:0032937);; Biological Process: inner ear morphogenesis (GO:0042472);; …	--	--	[T]	Signal transduction mechanisms	Insulin-induced protein (INSIG)	Insulin-induced gene 1 protein GN=INSIG1 OS=Gallus gallus (Chicken) PE=2 SV=1	T	Signal transduction mechanisms	insulin-induced gene 1 protein [Gallus gallus]
gene3533	859	883	1268	1395	878	0	0	6	3	0	29.606	27.7384	39.3362	38.0142	29.5708	0	0	0.174992	0.082952	0	1.48846e-58	-8.58958	down	--	--	Molecular Function: transcription regulatory region sequence-specific DNA binding (GO:0000976);; Molecular Function: transcription factor activity, sequence-specific DNA binding (GO:0003700);; Cellular Component: nucleus (GO:0005634);; Biological Process: axon guidance (GO:0007411);; Cellular Component: lamellipodium (GO:0030027);; Cellular Component: filopodium (GO:0030175);; Cellular Component:…	K09319|1.99041e-37|gga:100859435|K09319 homeobox protein engrailed | (RefSeq) EN2, En-2, Gg-En-2; engrailed homeobox 2	--	[R]	General function prediction only	--	Homeobox protein engrailed-2 GN=EN2 OS=Gallus gallus (Chicken) PE=1 SV=2	K	Transcription	engrailed protein, partial [Gallus gallus]
gene3633	3576	3686	3123	1803	2654	3942	6726	7969	3709	4534	10.9271	11.1302	9.16648	4.52712	8.37178	15.2755	18.3336	25.2968	13.5517	14.692	0.000776867	1.33031	up	--	--	--	--	--	--	--	--	--	S	Function unknown	PREDICTED: sickle tail protein homolog isoform X12 [Gallus gallus]
gene3674	722	929	776	939	715	1131	1560	974	1074	1239	8.33971	9.70766	7.99115	8.52812	7.96871	15.2619	15.5655	11.1221	14.5016	14.0433	0.00163215	1.05963	up	[R]	General function prediction only	Molecular Function: zinc ion binding (GO:0008270);; Biological Process: catabolic process (GO:0009056);; Molecular Function: hydrolase activity, acting on ester bonds (GO:0016788);;	K07048|0|gga:420525|K07048 phosphotriesterase-related protein | (RefSeq) PTER; phosphotriesterase related	--	--	--	Phosphotriesterase family;; TatD related DNase	Phosphotriesterase-related protein GN=pter OS=Xenopus tropicalis (Western clawed frog) PE=2 SV=1	R	General function prediction only	PREDICTED: phosphotriesterase-related protein isoform X3 [Gallus gallus]
[truncated: 191 more rows]

## Sheet: Table S3
#Domain	GO_ID	Term	Annotated	Significant	Expected	KS	Gene
Biological Process	GO:0006278	RNA-dependent DNA biosynthetic process	77	4	3.25	1e-30	Gallus_gallus_newGene_18494：LOC109365375，18494：up|Gallus_gallus_newGene_2075：AS27_14818，2075：up|Gallus_gallus_newGene_21552：N339_04974，21552：up|Gallus_gallus_newGene_47：LOC110391435，47：up
[truncated: 14,130 more rows]

## Sheet: Table S4
#Kegg_pathway	ko_id	Cluter_frequency	Genome_frequency	P-value	Corrected_P-value	ge
[truncated: 126 more rows]
