# Supplementary material for: Identification of Differentially Expressed Genes in Different Types of Broiler Skeletal Muscle Fibers Using the RNA-seq Technique
Source: Biomed Res Int. 2020 Jul 4;2020:9478949. doi: 10.1155/2020/9478949 (PMC7362283; doi:10.1155/2020/9478949)
Supplement: Supplementary Materials — Table S1: primer sequences for the genes selected for qRT-PCR. Table S2: DEGs identified under certain filter criteria. Table S3: GO enrichment analysis of DEGs. Table S4: KEGG pathway analysis of DEGs. [file 9478949.f1.zip › 9478949.f1/Table S1.xlsx]

## Sheet: Primer Sequence
Gene name	primer sequence(5'-3')
GAPDH	F: CGATCTGAACTACATGGTTTAC
	R: TCTGCCCATTTGATGTTGC
FHL1	F: CCCATCACTTCTGGAGGT
	R: TTGGAGCAAATGAAACAC
MYBPC1	F: AGTTAGCACACCACCAGC
	R: TTTCTCCAATAGACCATA
ADPRHL1	F: ATGTGCTTAGGGATGCGT
	R: CCTGTAGGGTGGTTGTGA
TPM4	F: GCTCAACAGACGCATCCA
	R: CCCCTCCAAAATCACCAA
TNNC1	F: TTGTTATGATGGTTCGGT
	R: TCGTCTCTCCAGTTGCCT
MYH1C	F: CTTATTACCACCAACCCA
	R: CATCAGCAGTGAAGCCCA
BPGM	F: AGTGATGGAATAAAGGAA
	R: TAGAGGTGAAGACAAGGT
MYHC IIA	F: CCACCAATCCATACGACT
	R: CTGGCTCTGCTTGCTCT
MYHC IIB	F: TCAAACAGAAACAGCGAG
	R: GCGAACAACCATCCACAA
MYHC I	F: ACGGAGGAGGACCGTAAGAA
	R: GGACAGGTTGCAGTTGGACT
F: fordward primer R: reverse primer

## Sheet: Sample Test Quality Report
Sample Name	Concentration (ng/ul)	Volume (μl)	Total RNA (μg)	RIN Value	28S/18S	OD 260/280	OD 260/230	Sample Status
P1T	298.5	18	5.4	6.1	0.57	1.97	1.64	Normal
P2T	204.8	18	3.7	5.3	0.2	2.05	1.32	Normal
P3T	264.7	18	4.8	5.8	0.45	2.01	1.08	Normal
P4T	175.6	18	3.2	5.4	0.24	2	1.05	Normal
P5T	190.2	18	3.4	5.7	0.53	1.94	1.34	Normal
P1X	346.9	18	6.2	6.6	1.15	1.94	1.82	Normal
P2X	503.9	18	9.1	6.4	1	1.97	1.77	Normal
P3X	299.2	18	5.4	6.2	0.84	1.92	2.04	Normal
P4X	234	18	4.2	6.2	0.96	2	1.21	Normal
P5X	243.2	18	4.4	6.1	0.69	2	1.3	Normal
