# Supplementary material for: Identification of Differentially Expressed Genes in Different Types of Broiler Skeletal Muscle Fibers Using the RNA-seq Technique
Source: Biomed Res Int. 2020 Jul 4;2020:9478949. doi: 10.1155/2020/9478949 (PMC7362283; doi:10.1155/2020/9478949)
Supplement: Supplementary Materials — Table S1: primer sequences for the genes selected for qRT-PCR. Table S2: DEGs identified under certain filter criteria. Table S3: GO enrichment analysis of DEGs. Table S4: KEGG pathway analysis of DEGs. [file 9478949.f1.zip › 9478949.f1/Table S2.xlsx]

## Sheet: down（338）
#ID	PT1_Count	PT2_Count	PT3_Count	PT4_Count	PT5_Count	PX1_Count	PX2_Count	PX3_Count	PX4_Count	PX5_Count	PT1_FPKM	PT2_FPKM	PT3_FPKM	PT4_FPKM	PT5_FPKM	PX1_FPKM	PX2_FPKM	PX3_FPKM	PX4_FPKM	PX5_FPKM	FDR	log2FC	regulated	COG_class	COG_class_annotation	GO_annotation	KEGG_annotation	KEGG_pathway_annotation	KOG_class	KOG_class_annotation	Pfam_annotation	Swiss-Prot_annotation	eggNOG_class	eggNOG_class_annotation	NR_annotation
Gallus_gallus_newGene_10688	98	127	109	209	129	7	22	3	19	20	1.67923	1.94392	2.19792	2.57958	2.16861	0.121133	0.321406	0.02927	0.31075	0.335857	3.81694e-05	-2.73834	down	--	--	--	--	--	--	--	--	--	--	--	--
Gallus_gallus_newGene_10859	2392	1249	429	295	1606	9	26	23	6	14	10.6143	4.53885	3.07452	1.12697	9.77297	0.016642	0.045301	0.044763	0.029409	0.054328	0.000183369	-5.87561	down	--	--	--	--	--	--	--	--	--	--	--	--
Gallus_gallus_newGene_10989	93	82	86	61	70	13	28	12	9	22	1.97491	1.6263	1.48261	0.788613	1.31576	0.280818	0.360087	0.185855	0.145374	0.412244	0.0204996	-1.78252	down	--	--	--	--	--	--	--	--	--	--	--	--
Gallus_gallus_newGene_12313	109	159	212	127	92	57	0	0	0	0	0.208652	0.277191	0.364591	0.191619	0.170695	0.12765	0	0	0	0	2.18495e-06	-2.91095	down	--	--	--	--	--	--	--	--	--	S	Function unknown	hypothetical protein N322_04680, partial [Cariama cristata]
Gallus_gallus_newGene_12925	300	79	192	208	202	21	23	43	19	16	0.76863	0.1721	0.42389	1.34913	0.550433	0.058123	0.056435	0.101909	0.05115	0.037803	0.000183369	-2.5029	down	--	--	--	--	--	--	--	--	--	--	--	--
Gallus_gallus_newGene_13537	206	354	272	115	625	14	33	56	20	31	1.34529	2.14468	1.63394	0.59534	4.04503	0.099322	0.179664	0.370734	0.146594	0.204177	0.0146904	-2.91656	down	--	--	--	--	--	--	--	--	--	--	--	hypothetical protein CIB84_003347 [Bambusicola thoracicus]
Gallus_gallus_newGene_13768	97	48	167	127	132	16	2	17	13	19	2.73501	1.26137	4.83409	3.31731	3.86468	0.540598	0.045976	0.48372	0.437644	0.51203	0.000133664	-2.54723	down	--	--	--	--	--	--	--	--	--	--	--	--
Gallus_gallus_newGene_14256	495	1181	581	737	517	13	289	0	109	323	3.21657	7.10215	3.46017	3.7871	3.28318	0.094337	1.62594	0	0.942065	2.08217	0.0105673	-1.86456	down	--	--	--	--	--	--	--	--	--	--	--	PREDICTED: uncharacterized protein LOC106034406 [Anser cygnoides domesticus]
Gallus_gallus_newGene_16454	390	264	328	80	154	47	53	47	10	31	2.12309	1.25355	0.880338	0.185891	0.684054	0.158474	0.187149	0.235143	0.038317	0.106955	0.0105528	-2.23475	down	--	--	--	--	--	--	--	--	--	--	--	--
Gallus_gallus_newGene_17309	251	281	116	539	187	0	0	0	0	0	1.55755	2.36795	0.801724	3.77054	1.29899	0	0	0	0	0	2.98084e-16	#NAME?	down	--	--	--	--	--	--	--	--	--	--	--	--
Gallus_gallus_newGene_17310	280	300	244	231	340	0	3	0	0	0	1.03225	1.12569	0.881466	0.682248	1.2421	0	0.003587	0	0	0	3.90864e-25	-8.54911	down	--	--	--	--	--	--	--	--	--	--	--	--
Gallus_gallus_newGene_17629	942	656	763	400	306	124	152	130	222	184	4.7708	4.41021	4.3775	1.64705	1.13599	0.501333	1.0598	0.547869	1.7489	1.28565	0.0325575	-1.4028	down	--	--	--	--	--	--	--	--	--	--	--	uncharacterized protein LOC104689428 isoform X1 [Corvus cornix cornix]
Gallus_gallus_newGene_17711	233	130	258	108	307	29	32	28	29	39	1.70224	0.930623	1.58812	0.563844	1.99917	0.210519	0.171581	0.170913	0.211829	0.244644	0.000903133	-2.25023	down	--	--	--	--	--	--	--	--	--	--	--	--
Gallus_gallus_newGene_18218	285	269	289	245	379	36	30	35	41	74	2.86079	3.27126	2.82374	2.24116	3.82055	0.326906	0.285815	0.370196	0.439977	0.714334	0.000100984	-2.28789	down	--	--	--	--	--	--	--	--	--	--	--	--
Gallus_gallus_newGene_19138	3287	2267	3107	2691	2859	552	175	244	273	330	8.70569	7.70997	7.18421	7.21877	6.87957	2.27917	0.398426	0.643419	0.859325	1.18229	4.06637e-22	-2.62667	down	--	--	--	--	--	[R]	General function prediction only	--	--	S	Function unknown	hypothetical protein llap_10261 [Limosa lapponica baueri]
Gallus_gallus_newGene_19444	990	1221	1357	5351	1274	0	0	0	0	0	17.5722	19.766	21.7191	75.1415	22.1666	0	0	0	0	0	3.96499e-10	#NAME?	down	--	--	--	--	--	--	--	--	--	--	--	--
Gallus_gallus_newGene_19450	179	117	177	105	157	0	0	5	0	0	0.469808	0.330867	0.569998	0.217072	0.583951	0	0	0.010644	0	0	6.3914e-17	-6.71483	down	--	--	--	--	--	--	--	--	--	--	--	--
Gallus_gallus_newGene_20261	74	78	63	95	59	12	0	20	10	31	0.833519	0.797075	0.632375	0.844752	0.643282	0.156574	0	0.2227	0.12811	0.34502	0.0122576	-1.84578	down	--	--	--	--	--	--	--	--	--	--	--	--
Gallus_gallus_newGene_23591	1132	1007	838	1554	416	291	160	299	173	449	44.4836	24.3711	19.4403	31.6922	10.4809	8.84953	3.56627	7.66606	5.8481	11.4802	0.00921492	-1.33451	down	--	--	Molecular Function: extracellular matrix structural constituent (GO:0005201);; Cellular Component: proteinaceous extracellular matrix (GO:0005578);; Cellular Component: collagen trimer (GO:0005581);; Molecular Function: metal ion binding (GO:0046872);;	--	--	[W]	Extracellular structures	Collagen triple helix repeat (20 copies)	Collagen alpha-1(I) chain OS=Gallus gallus OX=9031 GN=COL1A1 PE=1 SV=3	S	Function unknown	PREDICTED: LOW QUALITY PROTEIN: collagen alpha-1(I) chain-like, partial [Meleagris gallopavo]
Gallus_gallus_newGene_24150	54	59	49	138	146	3	6	7	11	7	0.990547	0.682135	0.55006	1.58734	1.34386	0.093892	0.147396	0.184759	0.381764	0.188799	0.000489713	-3.1767	down	--	--	--	--	--	--	--	--	--	S	Function unknown	major prion protein-like [Patagioenas fasciata monilis]
Gallus_gallus_newGene_24473	353	344	314	245	117	29	39	89	22	115	4.23239	3.13182	3.24462	2.56589	1.47542	0.389641	0.348618	1.16298	0.300619	1.39994	0.00555273	-1.78469	down	--	--	--	--	--	--	--	--	Myeloid-associated differentiation marker homolog OS=Xenopus laevis OX=8355 GN=myadm PE=2 SV=1	--	--	PREDICTED: myeloid-associated differentiation marker-like [Coturnix japonica]
Gallus_gallus_newGene_2464	3523	1797	768	591	2237	16	17	10	11	30	40.692	18.8471	7.96847	5.37695	25.2741	0.192299	0.155479	0.104394	0.138302	0.337702	1.23402e-05	-6.32652	down	--	--	--	--	--	--	--	--	--	--	--	--
Gallus_gallus_newGene_27553	307	312	187	211	245	80	64	50	61	67	1.99761	1.84518	1.09434	1.08358	1.55705	0.60858	0.355698	0.319772	0.462301	0.431403	0.022881	-1.46166	down	--	--	--	--	--	--	--	--	--	--	--	--
Gallus_gallus_newGene_4019	554	55	390	70	1293	9	3	8	3	13	0.936256	0.048656	0.346234	0.053916	3.52194	0.009375	0.001718	0.007549	0.00234	0.035673	0.031336	-5.63082	down	--	--	--	K19403|1.41345e-22|cjo:107312137|K19403 microcephalin | (RefSeq) MCPH1; microcephalin 1	--	--	--	--	--	S	Function unknown	hypothetical protein N322_04765, partial [Cariama cristata]
Gallus_gallus_newGene_7203	115	59	181	79	118	12	4	3	0	48	0.752594	0.706671	1.06826	0.405001	0.754599	0.0865	0.01736	0.013328	0	0.308888	0.000488076	-2.67667	down	--	--	--	--	--	--	--	--	--	--	--	--
gene1004	174	109	347	139	298	3	2	7	3	5	1.13466	0.63481	2.03316	0.716102	1.86122	0.014808	0.010404	0.037541	0.014809	0.028274	6.37324e-09	-5.24565	down	--	--	--	--	--	[R]	General function prediction only	Leucine rich repeat;; Leucine Rich repeats (2 copies);; Leucine rich repeat N-terminal domain;; Leucine rich repeats (6 copies);; Leucine rich repeat;; Leucine Rich Repeat	Peroxidasin (Precursor) GN=pxdn OS=Xenopus tropicalis (Western clawed frog) PE=2 SV=1	T	Signal transduction mechanisms	PREDICTED: leucine-rich repeat and transmembrane domain-containing protein 2 isoform X2 [Gallus gallus]
gene10059	77	58	91	72	48	15	15	17	8	25	0.426133	0.28866	0.629493	0.313742	0.491107	0.093297	0.068483	0.090032	0.049042	0.134687	0.0335579	-1.63548	down	--	--	Cellular Component: Golgi apparatus (GO:0005794);; Biological Process: response to biotic stimulus (GO:0009607);; Cellular Component: integral component of membrane (GO:0016021);;	--	--	--	--	Interferon-induced transmembrane protein	Synapse differentiation-inducing gene protein 1-like GN=syndig1l OS=Danio rerio (Zebrafish) PE=3 SV=1	S	Function unknown	PREDICTED: synapse differentiation inducing 1-like [Gallus gallus]
gene10097	1087	1358	1765	1103	1908	322	304	290	519	666	5.59011	5.99479	7.38004	3.70126	9.01096	2.28218	1.26817	1.17922	2.98057	3.43529	0.00171517	-1.28275	down	--	--	Cellular Component: membrane (GO:0016020);;	--	--	[R]	General function prediction only	Domain of unknown function DUF221;; Domain of unknown function (DUF4463);; Late exocytosis, associated with Golgi transport	--	S	Function unknown	PREDICTED: transmembrane protein 63C isoform X2 [Gallus gallus]
gene10245	408	378	924	569	512	110	95	107	121	262	5.1243	3.80329	6.56175	4.93661	4.59094	0.782208	1.1912	1.5565	1.65227	3.83411	0.00249936	-1.5116	down	--	--	Molecular Function: calcium ion binding (GO:0005509);; Biological Process: post-embryonic development (GO:0009791);; Cellular Component: external side of plasma membrane (GO:0009897);; Biological Process: negative regulation of Notch signaling pathway (GO:0045746);; Biological Process: embryonic skeletal system development (GO:0048706);;	--	--	[T]	Signal transduction mechanisms	EGF-like domain;; Human growth factor-like EGF;; EGF-like domain	Delta-like protein B (Precursor) GN=dlb OS=Danio rerio (Zebrafish) PE=1 SV=1	T	Signal transduction mechanisms	protein delta homolog 1 precursor [Gallus gallus]
gene10332	551	224	370	764	603	135	135	123	74	123	1.47179	0.2589	0.727984	0.785897	0.932985	0.431379	0.194058	0.381917	0.140959	0.275998	0.00322971	-1.58606	down	--	--	Biological Process: negative regulation of phosphatase activity (GO:0010923);; Molecular Function: phosphatase binding (GO:0019902);;	K17575|0|gga:776144|K17575 protein phosphatase 1 regulatory subunit 36 | (RefSeq) PPP1R36, C14orf50; protein phosphatase 1 regulatory subunit 36	--	--	--	Protein phosphatase 1 inhibitor	--	T	Signal transduction mechanisms	PREDICTED: protein phosphatase 1 regulatory subunit 36 isoform X3 [Gallus gallus]
gene10362	144	88	212	140	146	27	34	37	17	36	0.145839	0.081223	0.618354	0.399485	0.155728	0.031815	0.029217	0.0369	0.070023	0.0357	0.0115454	-1.79027	down	--	--	--	K19328|0|gga:423516|K19328 synaptotagmin-14/16 | (RefSeq) SYT16; synaptotagmin 16	--	[TU]	Signal transduction mechanisms;; Intracellular trafficking, secretion, and vesicular transport	C2 domain	Synaptotagmin-C GN=P65-C OS=Diplobatis ommata (Ocellated electric ray) PE=2 SV=1	TU	Signal transduction mechanisms;; Intracellular trafficking, secretion, and vesicular transport	PREDICTED: synaptotagmin-16 isoform X2 [Gallus gallus]
gene1037	1335	1206	1263	693	903	276	316	267	163	229	5.51154	4.54932	4.70868	2.25099	3.66017	1.33409	1.13436	1.09566	0.787212	0.921939	1.24282e-05	-1.62346	down	[R]	General function prediction only	Molecular Function: GTPase activity (GO:0003924);; Molecular Function: GTP binding (GO:0005525);; Biological Process: obsolete GTP catabolic process (GO:0006184);; Biological Process: small GTPase mediated signal transduction (GO:0007264);; Cellular Component: membrane (GO:0016020);;	K07855|4.93183e-131|mgp:100546692|K07855 Ras-related and estrogen-regulated growth inhibitor | (RefSeq) RERG; RAS like estrogen regulated growth inhibitor	--	[R]	General function prediction only	Ras family;; Miro-like protein;; ADP-ribosylation factor family	Ras-related protein Rap-1b (Precursor) GN=rap1b OS=Cyprinus carpio (Common carp) PE=2 SV=1	R	General function prediction only	PREDICTED: ras-related and estrogen-regulated growth inhibitor [Struthio camelus australis]
gene10380	1143	2492	1129	1763	1088	404	527	499	314	834	16.8382	35.5332	15.5207	21.6497	15.1687	7.42718	7.06637	7.62691	5.76042	12.4876	0.0436397	-1.08666	down	[IQR]	Lipid transport and metabolism;; Secondary metabolites biosynthesis, transport and catabolism;; General function prediction only	Molecular Function: oxidoreductase activity (GO:0016491);; Biological Process: oxidation-reduction process (GO:0055114);;	K11165|0|gga:423527|K11165 dehydrogenase/reductase SDR family member 7 [EC:1.1.-.-] | (RefSeq) DHRS7; dehydrogenase/reductase 7	--	[Q]	Secondary metabolites biosynthesis, transport and catabolism	short chain dehydrogenase;; Enoyl-(Acyl carrier protein) reductase;; KR domain	Dehydrogenase/reductase SDR family member 7B GN=dhrs7b OS=Xenopus tropicalis (Western clawed frog) PE=2 SV=1	Q	Secondary metabolites biosynthesis, transport and catabolism	PREDICTED: dehydrogenase/reductase SDR family member 7 [Gallus gallus]
gene10382	934	830	1055	889	879	294	191	363	256	374	3.38692	2.68276	3.42591	2.31888	2.97217	1.28465	0.589388	1.42196	0.996428	1.30396	0.00655434	-1.12163	down	--	--	--	--	--	[S]	Function unknown	Pecanex protein (C-terminus)	Pecanex-like protein 4 GN=pcnxl4 OS=Xenopus laevis (African clawed frog) PE=2 SV=1	S	Function unknown	PREDICTED: chromosome 5 open reading frame, human C14orf135 isoform X7 [Gallus gallus]
gene10683	1188	1102	128	656	676	48	48	8	12	14	4.53144	2.66039	0.303593	2.29055	2.18901	0.373296	0.186894	0.018552	0.029773	0.131721	3.58884e-05	-4.36355	down	--	--	--	K05457|0|gga:428937|K05457 neuregulin 3 | (RefSeq) NRG3; neuregulin 3	ErbB signaling pathway (ko04012)	--	--	Neuregulin family	Neuregulin-1 (Precursor) GN=NRG1 OS=Gallus gallus (Chicken) PE=1 SV=1	T	Signal transduction mechanisms	PREDICTED: pro-neuregulin-3, membrane-bound isoform [Gallus gallus]
gene10703	535	1129	1165	1046	769	141	62	273	168	349	2.21579	3.21878	3.07037	2.59147	2.24514	0.437344	0.151532	0.715465	0.521124	1.54403	1.24282e-05	-1.71429	down	[RTKL]	General function prediction only;; Signal transduction mechanisms;; Transcription;; Replication, recombination and repair	--	K05126|0|apla:101803164|K05126 proto-oncogene tyrosine-protein kinase Ret [EC:2.7.10.1] | (RefSeq) RET; ret proto-oncogene	Endocytosis (ko04144)	[T]	Signal transduction mechanisms	Protein tyrosine kinase;; Protein kinase domain;; Cadherin domain	Fibroblast growth factor receptor 2 (Precursor) GN=FGFR2 OS=Notophthalmus viridescens (Eastern newt) PE=2 SV=1	T	Signal transduction mechanisms	PREDICTED: proto-oncogene tyrosine-protein kinase receptor Ret [Meleagris gallopavo]
gene1084	4256	4986	3816	4622	8664	781	1340	1340	992	1893	63.485	67.7937	51.2369	54.5156	126.285	13.7197	17.2973	19.8759	17.4467	27.9936	0.0100326	-1.60501	down	[C]	Energy production and conversion	Molecular Function: L-lactate dehydrogenase activity (GO:0004459);; Molecular Function: structural constituent of eye lens (GO:0005212);; Cellular Component: cytosol (GO:0005829);; Biological Process: pyruvate metabolic process (GO:0006090);; Biological Process: glycolytic process (GO:0006096);; Biological Process: cellular carbohydrate metabolic process (GO:0044262);; Biological Process: oxidati…	K00016|0|gga:373997|K00016 L-lactate dehydrogenase [EC:1.1.1.27] | (RefSeq) LDHB; lactate dehydrogenase B	Glycolysis / Gluconeogenesis (ko00010);; Cysteine and methionine metabolism (ko00270);; Pyruvate metabolism (ko00620);; Propanoate metabolism (ko00640)	[C]	Energy production and conversion	lactate/malate dehydrogenase, NAD binding domain;; lactate/malate dehydrogenase, alpha/beta C-terminal domain;; Family 4 glycosyl hydrolase	L-lactate dehydrogenase B chain GN=LDHB OS=Gallus gallus (Chicken) PE=1 SV=3	C	Energy production and conversion	L-lactate dehydrogenase B chain [Gallus gallus]
gene10840	10861	6181	5750	8626	6205	2390	2870	1234	1656	2942	150.379	78.0002	71.6532	94.4272	83.9323	38.9986	34.4024	16.9857	27.0299	40.3725	0.00346228	-1.28316	down	--	--	Cellular Component: cytoplasm (GO:0005737);; Biological Process: response to stress (GO:0006950);; Biological Process: negative regulation of signal transduction (GO:0009968);; Biological Process: intracellular signal transduction (GO:0035556);; Biological Process: cellular metabolic process (GO:0044237);;	K08270|4.85285e-72|phi:102100098|K08270 DNA-damage-inducible transcript 4 | (RefSeq) DDIT4; DNA damage inducible transcript 4	mTOR signaling pathway (ko04150)	--	--	RTP801 C-terminal region	DNA damage-inducible transcript 4 protein GN=ddit4 OS=Xenopus tropicalis (Western clawed frog) PE=2 SV=1	T	Signal transduction mechanisms	PREDICTED: DNA damage-inducible transcript 4 protein [Pseudopodoces humilis]
gene10879	447	900	560	666	546	110	150	97	137	230	2.96223	5.35284	3.29018	3.43553	3.41791	0.828042	0.829193	0.614154	1.02722	1.45793	0.000608099	-1.61703	down	--	--	Molecular Function: transcription factor activity, RNA polymerase II transcription factor binding (GO:0001076);; Molecular Function: nucleic acid binding (GO:0003676);; Molecular Function: protein binding (GO:0005515);; Cellular Component: nucleus (GO:0005634);; Biological Process: regulation of transcription, DNA-templated (GO:0006355);; Biological Process: hindbrain development (GO:0030902);; M…	--	--	--	--	NocA-like zinc-finger protein 1	Zinc finger protein 503 GN=znf503 OS=Danio rerio (Zebrafish) PE=1 SV=1	K	Transcription	PREDICTED: zinc finger protein 503 [Taeniopygia guttata]
gene10915	3044	4426	3087	3602	6055	836	1168	1124	1057	1414	18.7795	41.0102	17.4148	18.1363	49.7042	6.70515	11.1607	11.2517	7.98853	15.8862	0.0039588	-1.37341	down	--	--	--	--	--	[TZ]	Signal transduction mechanisms;; Cytoskeleton	PDZ domain (Also known as DHR or GLGF);; LIM domain	PDZ and LIM domain protein 3 GN=pdlim3 OS=Xenopus laevis (African clawed frog) PE=2 SV=1	TZ	Signal transduction mechanisms;; Cytoskeleton	PREDICTED: PDZ and LIM domain protein 1 isoform X1 [Meleagris gallopavo]
gene10929	10095	6899	8445	15329	8425	1567	1826	1923	2619	3580	97.1337	60.5054	73.1342	116.614	79.2041	17.7668	15.2049	18.4091	29.7112	34.1435	3.07495e-06	-1.57913	down	[K]	Transcription	Biological Process: lens morphogenesis in camera-type eye (GO:0002089);; Molecular Function: transcription factor activity, sequence-specific DNA binding (GO:0003700);; Cellular Component: nucleus (GO:0005634);; Biological Process: locomotory behavior (GO:0007626);; Biological Process: midbrain development (GO:0030901);; Molecular Function: sequence-specific DNA binding (GO:0043565);; Biological …	K09357|0|fpg:101924830|K09357 paired-like homeodomain transcription factor 3 | (RefSeq) PITX3; paired like homeodomain 3	--	[K]	Transcription	Homeobox domain;; OAR domain	Pituitary homeobox 3 GN=pitx3 OS=Xenopus laevis (African clawed frog) PE=2 SV=1	K	Transcription	PREDICTED: pituitary homeobox 3 [Opisthocomus hoazin]
gene10986	10913	3791	10815	8714	9667	2989	3402	2300	1408	2545	45.2546	11.4549	38.2736	21.3224	37.552	12.2751	10.6442	7.58407	5.41801	7.80497	0.00709431	-1.31146	down	--	--	Biological Process: branching involved in blood vessel morphogenesis (GO:0001569);; Biological Process: ameboidal-type cell migration (GO:0001667);; Cellular Component: extracellular region (GO:0005576);; Biological Process: immune response (GO:0006955);; Biological Process: germ cell development (GO:0007281);; Biological Process: brain development (GO:0007420);; Molecular Function: chemokine act…	K10031|4.39642e-73|phi:102100846|K10031 C-X-C motif chemokine 12 | (RefSeq) CXCL12; C-X-C motif chemokine ligand 12	Cytokine-cytokine receptor interaction (ko04060);; Intestinal immune network for IgA production (ko04672)	--	--	Small cytokines (intecrine/chemokine), interleukin-8 like	Stromal cell-derived factor 1 {ECO:0000250|UniProtKB:P48061} (Precursor) GN=cxcl12 OS=Xenopus laevis (African clawed frog) PE=2 SV=1	T	Signal transduction mechanisms	PREDICTED: stromal cell-derived factor 1 [Meleagris gallopavo]
gene10995	8967	15868	9572	18873	6654	3057	5687	4179	3219	4212	67.1052	107.779	65.4705	112.602	48.8908	27.5151	37.8184	32.6211	30.5152	31.7065	0.023187	-1.04169	down	[Z]	Cytoskeleton	Molecular Function: ATP binding (GO:0005524);; Biological Process: obsolete ATP catabolic process (GO:0006200);; Biological Process: apoptotic process (GO:0006915);; Molecular Function: ATPase activity (GO:0016887);; Molecular Function: myosin binding (GO:0017022);; Biological Process: skeletal muscle thin filament assembly (GO:0030240);; Cellular Component: I band (GO:0031674);; Biological Proce…	K12313|0|umr:103661931|K12313 actin, aortic smooth muscle | (RefSeq) ACTA2; actin, alpha 2, smooth muscle, aorta	Vascular smooth muscle contraction (ko04270)	[Z]	Cytoskeleton	Actin	Actin, aortic smooth muscle (Precursor) GN=ACTA2 OS=Gallus gallus (Chicken) PE=1 SV=2	Z	Cytoskeleton	actin, aortic smooth muscle [Gallus gallus]
gene11167	212	93	203	181	196	27	49	53	26	25	0.405105	0.162508	0.348797	0.274257	0.365754	0.059601	0.080118	0.100165	0.057205	0.046244	0.00786779	-1.8086	down	--	--	Cellular Component: integral component of membrane (GO:0016021);;	--	--	[R]	General function prediction only	PKD domain	Sortilin-related receptor (Fragment) GN=SORL1 OS=Gallus gallus (Chicken) PE=2 SV=1	T	Signal transduction mechanisms	PREDICTED: VPS10 domain-containing receptor SorCS3 isoform X2 [Gallus gallus]
gene11190	2512	1001	3907	3443	4974	685	899	931	628	626	8.70298	3.18486	12.2138	9.32247	16.4689	2.8155	2.70744	3.24014	2.56857	2.03377	0.0291076	-1.56785	down	[I]	Lipid transport and metabolism	Molecular Function: glycerol-3-phosphate O-acyltransferase activity (GO:0004366);; Cellular Component: mitochondrial inner membrane (GO:0005743);; Biological Process: fatty acid metabolic process (GO:0006631);; Biological Process: acyl-CoA metabolic process (GO:0006637);; Biological Process: glycerophospholipid metabolic process (GO:0006650);; Biological Process: phospholipid biosynthetic process…	K00629|0|gga:423895|K00629 glycerol-3-phosphate O-acyltransferase 1/2 [EC:2.3.1.15] | (RefSeq) GPAM; glycerol-3-phosphate acyltransferase, mitochondrial	Glycerolipid metabolism (ko00561);; Glycerophospholipid metabolism (ko00564)	[I]	Lipid transport and metabolism	Acyltransferase	--	I	Lipid transport and metabolism	PREDICTED: glycerol-3-phosphate acyltransferase 1, mitochondrial isoform X5 [Gallus gallus]
gene11236	107	317	149	302	123	15	21	24	8	51	1.30209	3.74304	1.63533	2.94414	1.46307	0.192788	0.21529	0.29045	0.111491	0.612182	0.000363811	-2.61145	down	--	--	Molecular Function: transcription regulatory region sequence-specific DNA binding (GO:0000976);; Molecular Function: transcription factor activity, sequence-specific DNA binding (GO:0003700);; Cellular Component: nucleus (GO:0005634);; Biological Process: regulation of transcription, DNA-templated (GO:0006355);; Biological Process: anterior/posterior pattern specification (GO:0009952);; Biologica…	K09317|1.8796e-149|phi:102101083|K09317 homeobox protein EMX | (RefSeq) EMX2; empty spiracles homeobox 2	--	[K]	Transcription	Homeobox domain	Homeobox protein EMX1 GN=emx1 OS=Xenopus tropicalis (Western clawed frog) PE=2 SV=1	K	Transcription	PREDICTED: homeobox protein EMX2 isoform X2 [Gallus gallus]
gene11277	11106	13898	9245	9117	6519	2895	2534	3220	2429	6262	102.559	116.98	76.8375	66.5602	58.819	31.5096	20.255	29.5799	26.4432	57.3279	0.0118292	-1.05308	down	[O]	Posttranslational modification, protein turnover, chaperones	Biological Process: regulation of cell growth (GO:0001558);; Molecular Function: serine-type endopeptidase activity (GO:0004252);; Molecular Function: insulin-like growth factor binding (GO:0005520);; Cellular Component: extracellular region (GO:0005576);; Biological Process: proteolysis (GO:0006508);; Biological Process: negative regulation of transforming growth factor beta receptor signaling p…	K08784|0|tgu:100219623|K08784 HtrA serine peptidase 1 [EC:3.4.21.-] | (RefSeq) HTRA1; HtrA serine peptidase 1	--	[O]	Posttranslational modification, protein turnover, chaperones	Trypsin-like peptidase domain;; Trypsin;; PDZ domain;; PDZ domain (Also known as DHR or GLGF);; Kazal-type serine protease inhibitor domain;; Insulin-like growth factor binding protein;; Kazal-type serine protease inhibitor domain;; Peptidase S46	Serine protease HTRA1A (Precursor) GN=htra1a OS=Danio rerio (Zebrafish) PE=2 SV=1	W	Extracellular structures	PREDICTED: serine protease HTRA1 [Zonotrichia albicollis]
gene11472	228753	234758	211726	256574	121505	49043	56434	70513	45045	123476	844.826	790.177	703.719	748.556	437.984	213.709	180.242	259.259	196.094	451.543	0.00323846	-1.13662	down	--	--	Molecular Function: extracellular matrix structural constituent (GO:0005201);; Cellular Component: collagen trimer (GO:0005581);; Molecular Function: metal ion binding (GO:0046872);;	K19720|7.13233e-178|gga:396340|K19720 collagen, type III, alpha | (RefSeq) COL3A1, collagen; collagen type III alpha 1 chain	AGE-RAGE signaling pathway in diabetic complications (ko04933)	[W]	Extracellular structures	Collagen triple helix repeat (20 copies);; Fibrillar collagen C-terminal domain;; von Willebrand factor type C domain	Collagen alpha-1(III) chain (Precursor; Fragments) GN=COL3A1 OS=Gallus gallus (Chicken) PE=2 SV=2	W	Extracellular structures	RecName: Full=Collagen alpha-1(III) chain; Flags: Precursor, partial [Gallus gallus]
gene11474	1913	2407	2690	2602	2291	826	1064	728	546	715	9.47829	12.722	12.8816	12.0128	11.3467	4.41745	4.71676	3.10406	2.9505	3.14301	0.000247053	-1.11118	down	--	--	Cellular Component: cytoplasm (GO:0005737);; Biological Process: phagocytosis, engulfment (GO:0006911);;	--	--	[R]	General function prediction only	Phosphotyrosine interaction domain (PTB/PID);; Phosphotyrosine-binding domain;; Phosphotyrosine interaction domain (PTB/PID)	PTB domain-containing engulfment adapter protein 1 GN=gulp1 OS=Danio rerio (Zebrafish) PE=2 SV=1	R	General function prediction only	PREDICTED: PTB domain-containing engulfment adapter protein 1 isoform X10 [Gallus gallus]
gene11523	1693	1807	1728	2054	1869	690	564	660	22	654	4.72787	4.60125	4.34539	4.53693	5.101	2.27068	1.36214	1.83421	0.069292	1.80987	2.71124e-05	-1.35051	down	--	--	Biological Process: intracellular protein transport (GO:0006886);; Biological Process: regulation of G-protein coupled receptor protein signaling pathway (GO:0008277);; Molecular Function: protein transporter activity (GO:0008565);; Cellular Component: integral component of membrane (GO:0016021);;	K08447|0|gga:424016|K08447 receptor activity modifying protein 1 | (RefSeq) RAMP1; receptor activity modifying protein 1	Vascular smooth muscle contraction (ko04270)	--	--	RNA recognition motif. (a.k.a. RRM, RBD, or RNP domain);; RNA recognition motif (a.k.a. RRM, RBD, or RNP domain)	RNA-binding protein 44 GN=rbm44 OS=Danio rerio (Zebrafish) PE=3 SV=1	R	General function prediction only	PREDICTED: RNA-binding protein 44 isoform X3 [Gallus gallus]
gene11538	621	82	546	469	1133	0	0	0	0	0	5.40873	0.637335	4.34168	2.99974	9.97008	0	0	0	0	0	5.62259e-10	#NAME?	down	[R]	General function prediction only	Biological Process: protein ubiquitination (GO:0016567);; Biological Process: intracellular signal transduction (GO:0035556);;	K10340|0|mgp:100548492|K10340 ankyrin repeat and SOCS box protein 18 | (RefSeq) ASB18; ankyrin repeat and SOCS box containing 18	--	[R]	General function prediction only	Ankyrin repeats (3 copies);; Ankyrin repeat;; Ankyrin repeats (many copies);; Ankyrin repeats (many copies);; Ankyrin repeat;; SOCS box	Serine/threonine-protein phosphatase 6 regulatory ankyrin repeat subunit B GN=ANKRD44 OS=Gallus gallus (Chicken) PE=2 SV=1	R	General function prediction only	PREDICTED: ankyrin repeat and SOCS box protein 18 isoform X1 [Meleagris gallopavo]
gene11571	61420	61550	59824	84223	40168	16248	16247	20921	14171	37226	297.777	272.224	261.171	323.091	190.393	92.8602	68.2296	101.297	80.9121	179.085	0.0061526	-1.06446	down	--	--	Cellular Component: collagen trimer (GO:0005581);; Cellular Component: extracellular space (GO:0005615);; Biological Process: cell adhesion (GO:0007155);; Cellular Component: sarcolemma (GO:0042383);; Cellular Component: protein complex (GO:0043234);; Biological Process: protein heterotrimerization (GO:0070208);;	K06238|0|gga:396292|K06238 collagen, type VI, alpha | (RefSeq) COL6A2, colVIA2; collagen type VI alpha 2 chain	Focal adhesion (ko04510);; ECM-receptor interaction (ko04512)	[W]	Extracellular structures	von Willebrand factor type A domain;; Collagen triple helix repeat (20 copies);; von Willebrand factor type A domain	Collagen alpha-2(VI) chain (Precursor) GN=COL6A2 OS=Gallus gallus (Chicken) PE=2 SV=1	W	Extracellular structures	collagen alpha-2(VI) chain precursor [Gallus gallus]
gene11724	596	709	622	806	829	196	251	203	171	323	4.98784	5.69124	4.83212	5.34487	6.78038	1.90794	1.80814	1.66532	1.63054	2.60432	0.0144823	-1.15811	down	--	--	Molecular Function: p53 binding (GO:0002039);; Molecular Function: nucleic acid binding (GO:0003676);; Cellular Component: nucleus (GO:0005634);; Molecular Function: zinc ion binding (GO:0008270);; Biological Process: intrinsic apoptotic signaling pathway by p53 class mediator (GO:0072332);;	--	--	--	--	Zinc-finger of C2H2 type;; Zinc-finger double-stranded RNA-binding;; C2H2 type zinc-finger (2 copies);; U1 zinc finger;; A-kinase anchoring protein 95 (AKAP95)	Zinc finger protein 385B GN=znf385b OS=Danio rerio (Zebrafish) PE=2 SV=1	R	General function prediction only	PREDICTED: zinc finger protein 385B isoform X5 [Gallus gallus]
gene11853	851	517	762	1038	1275	218	230	180	306	365	4.17557	1.79629	2.78717	3.77068	6.01359	0.946443	0.713073	0.775472	1.52982	1.38641	0.00784518	-1.2727	down	[T]	Signal transduction mechanisms	Molecular Function: signal transducer activity (GO:0004871);; Molecular Function: voltage-gated potassium channel activity (GO:0005249);; Cellular Component: integral component of membrane (GO:0016021);;	K04910|0|gga:424184|K04910 potassium voltage-gated channel Eag-related subfamily H member 7 | (RefSeq) KCNH7; potassium voltage-gated channel subfamily H member 7	--	[PT]	Inorganic ion transport and metabolism;; Signal transduction mechanisms	Ion transport protein;; PAS domain;; Cyclic nucleotide-binding domain;; Ion channel;; PAS fold	Potassium voltage-gated channel subfamily H member 2 (Fragment) GN=KCNH2 OS=Gallus gallus (Chicken) PE=2 SV=1	P	Inorganic ion transport and metabolism	PREDICTED: potassium voltage-gated channel subfamily H member 7 isoform X1 [Gallus gallus]
gene11856	2026	2648	2060	2379	961	563	431	920	411	1004	11.3389	13.1088	8.09488	10.3111	5.41367	3.73496	2.33558	4.74504	1.70083	6.04631	0.00792612	-1.09695	down	[E]	Amino acid transport and metabolism	Molecular Function: serine-type endopeptidase activity (GO:0004252);; Biological Process: proteolysis (GO:0006508);; Cellular Component: membrane (GO:0016020);;	K08674|0|gga:424186|K08674 fibroblast activation protein, alpha [EC:3.4.21.-] | (RefSeq) FAP; fibroblast activation protein alpha	--	[O]	Posttranslational modification, protein turnover, chaperones	Dipeptidyl peptidase IV (DPP IV) N-terminal region;; Prolyl oligopeptidase family;; Alpha/beta hydrolase family;; Alpha/beta hydrolase family	--	O	Posttranslational modification, protein turnover, chaperones	seprase [Gallus gallus]
gene1197	184	394	241	196	231	54	68	56	41	124	3.49354	6.67185	3.6487	2.96631	4.24884	0.830875	0.768097	1.09107	1.1883	2.02789	0.0426477	-1.40734	down	--	--	Biological Process: endochondral ossification (GO:0001958);; Biological Process: osteoblast development (GO:0002076);; Molecular Function: hormone activity (GO:0005179);; Cellular Component: extracellular region (GO:0005576);; Cellular Component: nucleus (GO:0005634);; Cellular Component: Golgi apparatus (GO:0005794);; Biological Process: adenylate cyclase-activating G-protein coupled receptor si…	--	--	--	--	Parathyroid hormone family	Osteostatin (Precursor) GN=PTHLH OS=Gallus gallus (Chicken) PE=1 SV=1	T	Signal transduction mechanisms	RecName: Full=Parathyroid hormone-related protein; Short=PTH-rP; Short=PTHrP; Contains: RecName: Full=Osteostatin; AltName: Full=PTHrP[107-139]; Flags: Precursor [Gallus gallus]
gene12279	4575	2947	3482	6901	3628	997	934	1144	953	1872	64.1257	37.6472	43.9232	76.4785	49.6782	16.4672	11.3311	15.9531	15.7441	26.0041	0.000300555	-1.36396	down	--	--	Molecular Function: GTPase activator activity (GO:0005096);; Cellular Component: cytosol (GO:0005829);; Biological Process: spermatogenesis (GO:0007283);; Cellular Component: cytoplasmic side of plasma membrane (GO:0009898);; Biological Process: negative regulation of phospholipase activity (GO:0010519);; Biological Process: negative regulation of cardiac muscle hypertrophy (GO:0010614);; Biologi…	K18154|8.44665e-156|gga:378912|K18154 regulator of G-protein signaling 2 | (RefSeq) RGS2; regulator of G-protein signaling 2	--	[T]	Signal transduction mechanisms	Regulator of G protein signaling domain	Regulator of G-protein signaling 8 GN=rgs8 OS=Danio rerio (Zebrafish) PE=2 SV=1	T	Signal transduction mechanisms	regulator of G-protein signaling 2 [Gallus gallus]
gene12303	5717	12754	5358	9178	5898	1130	2120	1678	1397	4666	134.732	273.954	113.638	171.005	135.794	31.3828	43.2391	39.3367	38.8045	109.012	0.0272297	-1.37819	down	--	--	Molecular Function: AT DNA binding (GO:0003680);; Cellular Component: cytoplasm (GO:0005737);; Molecular Function: zinc ion binding (GO:0008270);; Molecular Function: DNA binding, bending (GO:0008301);; Biological Process: intrinsic apoptotic signaling pathway in response to DNA damage (GO:0008630);; Biological Process: response to zinc ion (GO:0010043);; Molecular Function: peptide binding (GO:0…	--	--	[TZ]	Signal transduction mechanisms;; Cytoskeleton	LIM domain	Cysteine and glycine-rich protein 2 GN=CSRP2 OS=Gallus gallus (Chicken) PE=2 SV=3	T	Signal transduction mechanisms	cysteine-rich protein 1 (intestinal) [Gallus gallus]
gene12312	350	79	318	577	505	42	12	54	98	33	4.11387	0.823667	3.38162	5.32272	5.83556	0.74765	0.108946	0.614942	1.36001	0.390955	0.00276394	-2.32392	down	[HE]	Coenzyme transport and metabolism;; Amino acid transport and metabolism	--	K00058|0|gga:424381|K00058 D-3-phosphoglycerate dehydrogenase [EC:1.1.1.95] | (RefSeq) PHGDH; phosphoglycerate dehydrogenase	Glycine, serine and threonine metabolism (ko00260);; Carbon metabolism (ko01200);; Biosynthesis of amino acids (ko01230)	[E]	Amino acid transport and metabolism	D-isomer specific 2-hydroxyacid dehydrogenase, NAD binding domain;; D-isomer specific 2-hydroxyacid dehydrogenase, catalytic domain	C-terminal-binding protein 2 GN=ctbp2 OS=Xenopus laevis (African clawed frog) PE=1 SV=1	E	Amino acid transport and metabolism	PREDICTED: d-3-phosphoglycerate dehydrogenase [Gallus gallus]
gene12338	607	1036	494	705	318	94	126	95	144	197	10.7328	15.4674	7.42504	6.85747	5.27438	1.21122	1.35973	1.02292	2.75189	3.09973	0.00222497	-1.76245	down	[K]	Transcription	Biological Process: positive regulation of mesenchymal cell proliferation (GO:0002053);; Molecular Function: transcription factor activity, sequence-specific DNA binding (GO:0003700);; Cellular Component: nucleolus (GO:0005730);; Biological Process: regulation of transcription, DNA-templated (GO:0006355);; Biological Process: embryonic limb morphogenesis (GO:0030326);; Biological Process: inner e…	K09329|1.88247e-152|gga:373941|K09329 paired mesoderm homeobox protein | (RefSeq) PRRX1, PMX1, Prx-1, Prx1, gMHox, homeobox; paired related homeobox 1	--	[R]	General function prediction only	Homeobox domain	Paired mesoderm homeobox protein 1 GN=PRRX1 OS=Gallus gallus (Chicken) PE=1 SV=2	K	Transcription	paired mesoderm homeobox protein 1 [Gallus gallus]
gene12405	1327	998	852	1231	731	403	332	281	299	451	7.23717	4.9236	4.72745	5.77012	3.9816	3.19264	1.78406	2.03104	2.67022	3.18421	0.00997712	-1.03126	down	--	--	Molecular Function: receptor binding (GO:0005102);; Cellular Component: extracellular space (GO:0005615);; Biological Process: transmembrane receptor protein tyrosine kinase signaling pathway (GO:0007169);;	--	--	[R]	General function prediction only	Fibrinogen beta and gamma chains, C-terminal globular domain	Fibrinogen C domain-containing protein 1 GN=fibcd1 OS=Xenopus tropicalis (Western clawed frog) PE=2 SV=1	R	General function prediction only	angiopoietin-related protein 1 precursor [Gallus gallus]
gene1260	18984	25881	13645	26922	9885	3825	3334	5027	2771	9338	119.25	156.759	74.5479	141.815	64.3368	30.1688	19.2412	33.2471	21.6723	61.2602	0.00325562	-1.49262	down	--	--	Cellular Component: microfibril (GO:0001527);;	--	--	--	--	Microfibril-associated glycoprotein (MAGP)	--	O	Posttranslational modification, protein turnover, chaperones	PREDICTED: microfibrillar-associated protein 5 isoform X3 [Gallus gallus]
gene12741	666	599	1047	705	536	89	138	100	201	112	7.94116	6.50674	11.2323	6.63997	6.24021	1.24937	1.41984	1.18236	2.82265	1.32348	5.00954e-06	-1.921	down	[K]	Transcription	Biological Process: neural crest cell migration (GO:0001755);; Molecular Function: double-stranded DNA binding (GO:0003690);; Molecular Function: transcription factor activity, RNA polymerase II distal enhancer sequence-specific binding (GO:0003705);; Cellular Component: nucleus (GO:0005634);; Cellular Component: transcription factor complex (GO:0005667);; Biological Process: pattern specificatio…	K09397|6.09386e-87|gga:395795|K09397 forkhead box protein D | (RefSeq) FOXD2; forkhead box D2	--	[K]	Transcription	Fork head domain	Forkhead box protein D2 OS=Xenopus laevis (African clawed frog) PE=2 SV=1	K	Transcription	forkhead box D2 [Gallus gallus]
gene12744	605	802	673	1154	340	114	188	182	171	280	1.70119	1.86502	1.64109	2.5166	0.886258	0.313539	0.380561	0.422465	0.471783	0.647821	0.00154917	-1.42088	down	--	--	--	--	--	--	--	TraB family	Metalloprotease TIKI2 (Precursor) GN=trabd2b OS=Xenopus tropicalis (Western clawed frog) PE=2 SV=1	T	Signal transduction mechanisms	PREDICTED: metalloprotease TIKI2 [Gallus gallus]
gene1308	542	1137	833	821	656	171	276	282	90	543	3.48373	6.65989	4.81516	4.16845	4.11505	1.29254	1.5317	1.79744	0.677139	3.45485	0.0224301	-1.11344	down	--	--	--	K08440|0|gga:418288|K08440 G protein-coupled receptor 162 | (RefSeq) GPR162, GPR153; G protein-coupled receptor 162	--	--	--	7 transmembrane receptor (rhodopsin family)	--	T	Signal transduction mechanisms	PREDICTED: probable G-protein coupled receptor 162 [Gallus gallus]
gene13174	19127	16969	23269	22988	14958	6569	8316	6375	4171	8477	184.377	149.055	202.083	175.262	140.942	74.6421	69.4276	61.1308	47.4395	80.9875	0.00432158	-1.02797	down	--	--	Molecular Function: hormone activity (GO:0005179);; Cellular Component: collagen trimer (GO:0005581);; Cellular Component: extracellular space (GO:0005615);; Cellular Component: endoplasmic reticulum (GO:0005783);; Biological Process: fatty acid beta-oxidation (GO:0006635);; Biological Process: response to glucose (GO:0009749);; Biological Process: positive regulation of protein kinase A signalin…	K07296|2.77366e-145|gga:404536|K07296 adiponectin | (RefSeq) ADIPOQ; adiponectin, C1Q and collagen domain containing	PPAR signaling pathway (ko03320);; Adipocytokine signaling pathway (ko04920)	--	--	C1q domain;; Collagen triple helix repeat (20 copies)	Otolin-1 (Precursor) GN=otol1 OS=Oncorhynchus keta (Chum salmon) PE=1 SV=1	W	Extracellular structures	adiponectin precursor [Gallus gallus]
gene13202	449	824	390	572	657	184	187	165	212	202	3.66548	6.10837	2.85249	4.13853	5.15338	1.73031	1.27186	1.37075	2.0121	1.57975	0.0299577	-1.08877	down	--	--	Biological Process: protein ubiquitination (GO:0016567);; Biological Process: intracellular signal transduction (GO:0035556);;	K10343|0|mgp:100540802|K10343 SPRY domain-containing SOCS box protein 1/4 | (RefSeq) SPSB4; splA/ryanodine receptor domain and SOCS box containing 4	--	[R]	General function prediction only	SPRY domain;; SOCS box	F-box/SPRY domain-containing protein 1 GN=fbxo45 OS=Danio rerio (Zebrafish) PE=2 SV=2	R	General function prediction only	PREDICTED: SPRY domain-containing SOCS box protein 4 isoform X3 [Gallus gallus]
gene13219	1445	1557	904	1027	809	460	304	365	204	559	8.81415	5.13325	2.94261	5.50872	2.85879	1.96179	1.05919	1.31287	1.14616	2.00843	0.0132718	-1.1193	down	--	--	Molecular Function: voltage-gated potassium channel activity (GO:0005249);; Biological Process: ion transport (GO:0006811);; Cellular Component: membrane (GO:0016020);;	K04898|1.32182e-91|gga:771271|K04898 potassium voltage-gated channel Isk-related subfamily E member 4 | (RefSeq) KCNE4; potassium voltage-gated channel subfamily E regulatory subunit 4	--	--	--	Slow voltage-gated potassium channel	--	P	Inorganic ion transport and metabolism	PREDICTED: potassium voltage-gated channel subfamily E member 4 [Gallus gallus]
gene13225	2989	5520	4624	4508	2020	921	1166	1548	910	2095	30.2535	51.4193	42.4062	36.0489	19.9601	11.2074	10.4301	15.9597	11.0717	21.4719	0.0128383	-1.07252	down	[O]	Posttranslational modification, protein turnover, chaperones	Molecular Function: serine-type endopeptidase inhibitor activity (GO:0004867);; Molecular Function: receptor binding (GO:0005102);; Cellular Component: extracellular region (GO:0005576);; Cellular Component: cytosol (GO:0005829);; Molecular Function: heparin binding (GO:0008201);; Biological Process: negative regulation of cell proliferation (GO:0008285);; Biological Process: negative regulation …	K16643|0|gga:424805|K16643 glia-derived nexin | (RefSeq) SERPINE2; serpin family E member 2	--	[V]	Defense mechanisms	Serpin (serine protease inhibitor)	Neuroserpin (Precursor) GN=SERPINI1 OS=Gallus gallus (Chicken) PE=1 SV=1	V	Defense mechanisms	plasminogen activator inhibitor type 1, member 2 precursor [Gallus gallus]
gene1325	775	693	1464	1060	1146	212	179	303	229	483	4.19742	3.50448	7.57721	4.76054	6.43492	1.39888	0.866303	1.69103	1.49264	2.89216	0.000420507	-1.37978	down	--	--	--	--	--	[W]	Extracellular structures	Cadherin domain;; Concanavalin A-like lectin/glucanases superfamily	Protocadherin-15 (Precursor) GN=Pcdh15 OS=Gallus gallus (Chicken) PE=1 SV=1	W	Extracellular structures	PREDICTED: calsyntenin-3 [Gallus gallus]
gene13276	1039	1065	993	984	795	256	247	338	230	441	5.88645	5.7046	4.55984	4.26476	4.48579	1.53818	1.08223	1.72041	1.37152	2.37303	0.00328535	-1.20037	down	[P]	Inorganic ion transport and metabolism	Biological Process: regulation of pH (GO:0006885);; Molecular Function: sodium:proton antiporter activity (GO:0015385);; Cellular Component: integral component of membrane (GO:0016021);;	K14725|0|gga:424772|K14725 solute carrier family 9 (sodium/hydrogen exchanger), member 9 | (RefSeq) SLC9A9; solute carrier family 9 member A9	--	[P]	Inorganic ion transport and metabolism	Sodium/hydrogen exchanger family	Sodium/hydrogen exchanger 8 OS=Gallus gallus (Chicken) PE=2 SV=1	P	Inorganic ion transport and metabolism	sodium/hydrogen exchanger 9 [Gallus gallus]
gene13289	65	83	123	236	66	0	0	0	7	0	0.370541	0.520901	0.796557	1.43115	0.406787	0	0	0	0.026844	0	1.96685e-08	-5.55227	down	[R]	General function prediction only	--	K09225|0|cmy:102938738|K09225 zinc finger protein ZIC 4 | (RefSeq) ZIC4; Zic family member 4	--	[R]	General function prediction only	Zinc-finger double domain;; Zinc finger, C2H2 type;; C2H2-type zinc finger;; Zinc-finger double-stranded RNA-binding	Zinc finger protein ZIC 4 {ECO:0000303|PubMed:16871625} GN=zic4 OS=Xenopus laevis (African clawed frog) PE=2 SV=1	K	Transcription	PREDICTED: zinc finger protein ZIC 4 [Chelonia mydas]
gene13290	477	346	469	479	376	0	0	0	0	0	3.73667	2.63774	3.12089	2.9273	2.916	0	0	0	0	0	5.41181e-36	#NAME?	down	[R]	General function prediction only	Biological Process: neural plate development (GO:0001840);; Molecular Function: DNA binding (GO:0003677);; Molecular Function: transcription factor activity, sequence-specific DNA binding (GO:0003700);; Cellular Component: nucleus (GO:0005634);; Cellular Component: cytoplasm (GO:0005737);; Biological Process: behavior (GO:0007610);; Biological Process: regulation of smoothened signaling pathway (…	K09224|0|gga:374103|K09224 zinc finger protein ZIC 1 | (RefSeq) ZIC1; Zic family member 1	--	[R]	General function prediction only	Zinc-finger double domain;; Zinc finger, C2H2 type;; C2H2-type zinc finger;; Zinc-finger double-stranded RNA-binding	Zinc finger protein ZIC 1 GN=ZIC1 OS=Gallus gallus (Chicken) PE=1 SV=1	K	Transcription	zinc finger protein ZIC 1 [Gallus gallus]
gene13300	75	66	60	78	63	19	11	0	6	36	0.40945	0.328221	0.293266	0.339553	0.337614	0.120145	0.052174	0	0.038455	0.193768	0.0186156	-1.8021	down	--	--	--	K08098|0|gga:429144|K08098 phosphatidylinositol glycan, class Z [EC:2.4.1.-] | (RefSeq) PIGZ; phosphatidylinositol glycan anchor biosynthesis class Z	Glycosylphosphatidylinositol(GPI)-anchor biosynthesis (ko00563)	[G]	Carbohydrate transport and metabolism	Alg9-like mannosyltransferase family	--	G	Carbohydrate transport and metabolism	PREDICTED: GPI mannosyltransferase 4 [Gallus gallus]
gene13316	868	757	1592	1215	587	230	312	131	187	497	1.29621	1.03079	5.74218	1.43523	0.856879	0.403472	0.403513	0.845056	0.32869	0.73525	0.0043738	-1.40309	down	[S]	Function unknown	--	--	--	[R]	General function prediction only	Leucine rich repeat;; Leucine Rich repeats (2 copies);; Leucine rich repeats (6 copies);; Leucine Rich Repeat;; Leucine-rich repeat;; Leucine rich repeat	Leucine-rich repeat-containing G-protein coupled receptor 4 (Precursor) GN=lgr4 OS=Xenopus tropicalis (Western clawed frog) PE=1 SV=1	R	General function prediction only	PREDICTED: uncharacterized protein LOC101814551 [Ficedula albicollis]
gene1374	5541	13333	7143	9197	8164	2552	3017	2166	1301	2794	33.3686	73.1821	38.7156	43.7858	48.0318	18.1147	15.7289	12.9718	9.2362	16.678	0.00118336	-1.38452	down	--	--	Biological Process: negative regulation of transcription from RNA polymerase II promoter (GO:0000122);; Molecular Function: transcription regulatory region sequence-specific DNA binding (GO:0000976);; Molecular Function: RNA polymerase II transcription corepressor activity (GO:0001106);; Molecular Function: transcription factor activity, sequence-specific DNA binding (GO:0003700);; Molecular Func…	K10182|0|gga:418313|K10182 T-box protein 15 | (RefSeq) TBX15; T-box 15	--	[K]	Transcription	T-box	T-box transcription factor TBX20 GN=TBX20 OS=Gallus gallus (Chicken) PE=2 SV=1	K	Transcription	PREDICTED: T-box transcription factor TBX15 [Gallus gallus]
gene13764	3397	4699	2258	4067	2467	800	930	1020	840	2515	29.8657	37.9268	16.7078	29.4906	20.396	8.52879	7.44453	8.77336	8.92636	22.3457	0.0437161	-1.00948	down	--	--	--	K14678|0|gga:426411|K14678 lysyl oxidase-like protein 1 [EC:1.4.3.-] | (RefSeq) LOXL1; lysyl oxidase like 1	--	--	--	Lysyl oxidase	Protein-lysine 6-oxidase (Precursor) GN=LOX OS=Gallus gallus (Chicken) PE=2 SV=1	O	Posttranslational modification, protein turnover, chaperones	PREDICTED: lysyl oxidase homolog 1 [Haliaeetus leucocephalus]
gene13841	3566	5541	3134	8207	5414	1504	1846	1141	1620	1560	29.6323	40.803	24.8022	44.5132	35.4613	12.8324	14.721	9.93125	15.4935	13.833	0.00245059	-1.21973	down	[O]	Posttranslational modification, protein turnover, chaperones	Molecular Function: ATP binding (GO:0005524);; Biological Process: protein folding (GO:0006457);; Biological Process: response to heat (GO:0009408);; Molecular Function: heat shock protein binding (GO:0031072);; Molecular Function: metal ion binding (GO:0046872);; Molecular Function: unfolded protein binding (GO:0051082);;	K09505|0|gga:415360|K09505 DnaJ homolog subfamily A member 4 | (RefSeq) DNAJA4; DnaJ heat shock protein family (Hsp40) member A4	--	[O]	Posttranslational modification, protein turnover, chaperones	DnaJ C terminal domain;; DnaJ central domain	DnaJ homolog subfamily B member 6-A GN=dnajb6-a OS=Xenopus laevis (African clawed frog) PE=2 SV=1	O	Posttranslational modification, protein turnover, chaperones	PREDICTED: dnaJ homolog subfamily A member 4, partial [Gallus gallus]
gene13846	913	2174	842	869	837	55	79	95	166	26	5.95924	13.643	5.18096	4.72086	5.5806	0.393744	0.439346	0.63469	1.34374	0.143964	0.000125977	-3.15932	down	[RTKL]	General function prediction only;; Signal transduction mechanisms;; Transcription;; Replication, recombination and repair	--	K08803|0|clv:102095370|K08803 death-associated protein kinase [EC:2.7.11.1] | (RefSeq) DAPK2; death associated protein kinase 2	--	[T]	Signal transduction mechanisms	Protein kinase domain;; Protein tyrosine kinase	Myosin light chain kinase, smooth muscle, deglutamylated form GN=Mylk OS=Gallus gallus (Chicken) PE=1 SV=2	T	Signal transduction mechanisms	PREDICTED: death-associated protein kinase 3 isoform X4 [Gallus gallus]
gene13970	26551	26940	20786	25404	13961	5990	5720	8696	4582	11628	56.7529	52.5242	39.9637	42.9224	29.1481	15.0969	10.599	18.4472	11.5414	24.5859	0.00118892	-1.15314	down	--	--	--	K06825|0|mgp:723984|K06825 fibrillin 1 | (RefSeq) FBN1; fibrillin 1	--	[T]	Signal transduction mechanisms	Calcium-binding EGF domain;; Complement Clr-like EGF-like;; EGF-like domain;; TB domain;; Coagulation Factor Xa inhibitory site;; EGF domain	Notch 1 intracellular domain (Precursor) GN=notch1 OS=Xenopus tropicalis (Western clawed frog) PE=1 SV=2	T	Signal transduction mechanisms	PREDICTED: fibrillin-1 [Meleagris gallopavo]
gene13978	709	613	859	1044	575	146	105	262	222	319	11.3691	9.04056	12.3697	13.5196	8.68193	2.65585	1.60965	4.38883	4.33598	5.20678	0.00222497	-1.32465	down	--	--	Molecular Function: growth factor activity (GO:0008083);;	K04358|9.59443e-129|mgp:100550759|K04358 fibroblast growth factor | (RefSeq) FGF7; fibroblast growth factor 7	MAPK signaling pathway (ko04010);; Regulation of actin cytoskeleton (ko04810)	[T]	Signal transduction mechanisms	Fibroblast growth factor	Fibroblast growth factor 9 (Precursor) GN=fgf9 OS=Xenopus laevis (African clawed frog) PE=2 SV=1	T	Signal transduction mechanisms	keratinocyte growth factor [Gallus gallus]
gene14000	753	930	455	1010	1352	159	167	170	251	212	4.04784	4.55629	2.19917	4.28974	7.09802	1.00487	0.775747	0.909198	1.58973	1.12578	0.00195122	-1.71479	down	--	--	--	K15010|0|mgp:100542956|K15010 homer | (RefSeq) HOMER2; homer scaffolding protein 2	FoxO signaling pathway (ko04068)	--	--	WH1 domain;; DMPK coiled coil domain like	--	T	Signal transduction mechanisms	PREDICTED: homer protein homolog 2 [Melopsittacus undulatus]
gene14069	4535	2260	2060	4599	4118	211	392	126	178	218	18.2166	10.2465	7.90485	14.6411	16.6952	1.26213	1.95888	0.604187	0.75456	1.14566	1.369e-09	-3.49101	down	[E]	Amino acid transport and metabolism	Molecular Function: metallocarboxypeptidase activity (GO:0004181);; Biological Process: proteolysis (GO:0006508);; Molecular Function: zinc ion binding (GO:0008270);;	--	--	[E]	Amino acid transport and metabolism	Zinc carboxypeptidase	Cytosolic carboxypeptidase 1 GN=agtpbp1 OS=Danio rerio (Zebrafish) PE=2 SV=1	E	Amino acid transport and metabolism	PREDICTED: cytosolic carboxypeptidase 4 isoform X1 [Gallus gallus]
gene14077	1691	2637	1919	1986	1771	416	783	328	254	752	21.1228	21.4659	17.1548	20.6643	20.8724	6.99549	9.44785	5.12249	3.34043	10.052	1.10871e-06	-1.53119	down	--	--	Biological Process: ganglioside biosynthetic process (GO:0001574);; Molecular Function: alpha-N-acetylneuraminate alpha-2,8-sialyltransferase activity (GO:0003828);; Biological Process: N-glycan processing (GO:0006491);; Cellular Component: integral component of Golgi membrane (GO:0030173);;	K06612|0|gga:414336|K06612 alpha-N-acetyl-neuraminate alpha-2,8-sialyltransferase (sialyltransferase 8B) [EC:2.4.99.-] | (RefSeq) ST8SIA2, SIAT8B; ST8 alpha-N-acetyl-neuraminide alpha-2,8-sialyltransferase 2	--	[G]	Carbohydrate transport and metabolism	Glycosyltransferase family 29 (sialyltransferase)	Alpha-N-acetylneuraminide alpha-2,8-sialyltransferase {ECO:0000250|UniProtKB:Q92185} GN=st8sia1 OS=Xenopus laevis (African clawed frog) PE=1 SV=1	G	Carbohydrate transport and metabolism	alpha-2,8-sialyltransferase 8B precursor [Gallus gallus]
gene14078	3968	3951	3656	4186	4659	980	1195	921	870	1291	18.9296	17.1798	15.6946	15.7862	21.7133	5.50646	4.93226	4.36857	4.89248	6.10362	1.45655e-07	-1.46945	down	--	--	Cellular Component: membrane (GO:0016020);;	--	--	--	--	Protein of unknown function (DUF1180)	Membrane protein FAM174B (Precursor) GN=Fam174b OS=Danio rerio (Zebrafish) PE=2 SV=2	S	Function unknown	PREDICTED: membrane protein FAM174B isoform X3 [Gallus gallus]
gene14094	3265	3799	3746	3244	3353	800	1153	1044	765	1046	46.472	50.7264	48.1878	37.9867	47.553	13.5465	14.738	14.8608	13.0198	15.2253	1.35481e-06	-1.3653	down	--	--	Biological Process: negative regulation of transcription from RNA polymerase II promoter (GO:0000122);; Biological Process: neuron migration (GO:0001764);; Biological Process: maternal placenta development (GO:0001893);; Biological Process: negative regulation of endothelial cell proliferation (GO:0001937);; Molecular Function: retinoic acid binding (GO:0001972);; Molecular Function: steroid horm…	K08548|0|gga:386585|K08548 COUP transcription factor 2 | (RefSeq) NR2F2, COUP-TFII; nuclear receptor subfamily 2 group F member 2	--	[T]	Signal transduction mechanisms	Ligand-binding domain of nuclear hormone receptor;; Zinc finger, C4 type (two domains)	COUP transcription factor 2 GN=NR2F2 OS=Gallus gallus (Chicken) PE=2 SV=1	K	Transcription	PREDICTED: COUP transcription factor 2 isoform X2 [Charadrius vociferus]
gene14180	1243	1253	986	1336	1138	230	241	299	134	897	5.63995	5.20556	4.01085	4.86315	5.13117	1.22073	0.929575	1.35141	0.7582	4.03092	0.0017137	-1.30818	down	--	--	Biological Process: cell adhesion (GO:0007155);; Biological Process: integrin-mediated signaling pathway (GO:0007229);; Cellular Component: integrin complex (GO:0008305);;	K06587|0|mgp:100547226|K06587 integrin alpha 11 | (RefSeq) ITGA11; integrin subunit alpha 11	Focal adhesion (ko04510);; ECM-receptor interaction (ko04512);; Regulation of actin cytoskeleton (ko04810)	[W]	Extracellular structures	Integrin alpha;; von Willebrand factor type A domain;; FG-GAP repeat;; von Willebrand factor type A domain;; Repeat domain in Vibrio, Colwellia, Bradyrhizobium and Shewanella	Integrin alpha-1 (Fragment) GN=ITGA1 OS=Gallus gallus (Chicken) PE=2 SV=1	W	Extracellular structures	PREDICTED: integrin alpha-11 isoform X8 [Gallus gallus]
gene14464	56	73	50	85	64	0	11	12	13	32	0.956529	0.982283	0.968304	1.21584	1.27058	0	0.121811	0.150369	0.225282	0.653656	0.016932	-1.83652	down	--	--	Molecular Function: calcium ion binding (GO:0005509);;	--	--	--	--	EF-hand domain pair;; EF hand;; EF-hand domain pair;; EF-hand domain;; EF hand	--	T	Signal transduction mechanisms	PREDICTED: N-terminal EF-hand calcium-binding protein 2 isoform X6 [Gallus gallus]
gene14507	490	396	337	362	372	120	108	131	64	168	2.06054	0.902532	0.757026	0.714434	0.907574	0.353174	0.231044	0.323779	0.187849	0.414784	0.0372277	-1.25813	down	--	--	Molecular Function: calcium ion binding (GO:0005509);;	K03213|0|apla:101793483|K03213 naked cuticle | (RefSeq) NKD1; naked cuticle homolog 1	Wnt signaling pathway (ko04310)	--	--	--	Protein naked cuticle homolog 1 GN=nkd1 OS=Danio rerio (Zebrafish) PE=2 SV=1	T	Signal transduction mechanisms	PREDICTED: protein naked cuticle homolog 1 isoform X5 [Gallus gallus]
gene14632	551	395	580	508	372	84	118	103	50	170	2.01161	1.23512	1.90807	1.455	1.24008	0.33534	0.343625	0.346597	0.20022	0.575462	0.00106782	-1.73853	down	--	--	Molecular Function: metalloendopeptidase activity (GO:0004222);; Cellular Component: proteinaceous extracellular matrix (GO:0005578);; Biological Process: proteolysis (GO:0006508);; Molecular Function: zinc ion binding (GO:0008270);;	K08632|0|gga:100858277|K08632 a disintegrin and metalloproteinase with thrombospondin motifs 18 [EC:3.4.24.-] | (RefSeq) ADAMTS18; ADAM metallopeptidase with thrombospondin type 1 motif 18	--	[O]	Posttranslational modification, protein turnover, chaperones	ADAM-TS Spacer 1;; Reprolysin (M12B) family zinc metalloprotease;; Thrombospondin type 1 domain;; Reprolysin family propeptide;; Metallo-peptidase family M12;; PLAC (protease and lacunin) domain;; Metallo-peptidase family M12B Reprolysin-like;; Metallo-peptidase family M12B Reprolysin-like;; Metallo-peptidase family M12B Reprolysin-like	Coagulation factor X-activating enzyme heavy chain alternate form (Precursor) OS=Macrovipera lebetina (Levantine viper) PE=1 SV=1	O	Posttranslational modification, protein turnover, chaperones	PREDICTED: A disintegrin and metalloproteinase with thrombospondin motifs 18 isoform X1 [Gallus gallus]
gene14638	347	578	826	792	695	147	203	181	147	218	2.33927	3.60554	4.47019	3.88923	4.23404	1.11364	1.16667	1.15997	1.12094	1.49055	0.00425125	-1.34484	down	--	--	Molecular Function: transcription factor activity, sequence-specific DNA binding (GO:0003700);; Molecular Function: protein binding (GO:0005515);; Cellular Component: nucleus (GO:0005634);; Biological Process: transcription, DNA-templated (GO:0006351);; Molecular Function: sequence-specific DNA binding (GO:0043565);;	K09035|5.38029e-79|phi:102105380|K09035 transcription factor Maf | (RefSeq) MAF; MAF bZIP transcription factor	--	[K]	Transcription	bZIP Maf transcription factor;; Maf N-terminal region	Transcription factor Maf GN=MAF OS=Gallus gallus (Chicken) PE=1 SV=1	K	Transcription	PREDICTED: transcription factor Maf isoform X1 [Pseudopodoces humilis]
gene14675	1987	1691	1734	2477	2560	713	614	311	367	538	7.72605	5.99337	6.06778	7.61633	9.74852	3.26748	2.07138	1.20075	1.68268	2.0964	2.31928e-07	-1.52942	down	[S]	Function unknown	Cellular Component: extracellular region (GO:0005576);; Molecular Function: heparin binding (GO:0008201);; Cellular Component: transport vesicle (GO:0030133);; Biological Process: extracellular matrix organization (GO:0030198);; Cellular Component: extracellular matrix (GO:0031012);;	K19919|0|gga:415818|K19919 cysteine-rich secretory protein | (RefSeq) CRISPLD2; cysteine rich secretory protein LCCL domain containing 2	--	[S]	Function unknown	LCCL domain;; Cysteine-rich secretory protein family	Cysteine-rich secretory protein LCCL domain-containing 2 (Precursor) GN=crispld2 OS=Xenopus tropicalis (Western clawed frog) PE=2 SV=1	S	Function unknown	PREDICTED: cysteine-rich secretory protein LCCL domain-containing 2 [Gallus gallus]
gene14706	602	473	580	469	436	143	207	186	90	227	0.873653	0.583032	0.706903	0.50583	0.578012	0.227032	0.244504	0.249854	0.142393	0.304225	0.047463	-1.12254	down	--	--	--	--	--	[R]	General function prediction only	C2H2-type zinc finger	B-cell lymphoma 6 protein homolog OS=Gallus gallus (Chicken) PE=2 SV=1	R	General function prediction only	PREDICTED: zinc finger protein 469 isoform X1 [Gallus gallus]
gene1477	3712	3193	3135	5668	3253	1014	792	1098	763	3192	17.6109	13.8068	13.3854	21.2616	15.0787	5.67184	3.25247	5.182	4.26864	15.015	0.0445509	-1.00772	down	--	--	--	--	--	--	--	Dermatopontin	--	R	General function prediction only	PREDICTED: dermatopontin [Meleagris gallopavo]
gene14901	1891	2020	2414	3426	3037	424	884	506	504	639	10.8973	9.45874	11.7175	13.5069	16.1909	3.07443	3.54092	2.55944	2.54118	3.94177	1.6587e-08	-1.6212	down	[RTKL]	General function prediction only;; Signal transduction mechanisms;; Transcription;; Replication, recombination and repair	--	K04444|0|gga:415917|K04444 mitogen-activated protein kinase-activated protein kinase 3 [EC:2.7.11.1] | (RefSeq) MAPKAPK3; mitogen-activated protein kinase-activated protein kinase 3	MAPK signaling pathway (ko04010);; VEGF signaling pathway (ko04370)	[T]	Signal transduction mechanisms	Protein kinase domain;; Protein tyrosine kinase;; Lipopolysaccharide kinase (Kdo/WaaP) family	Ribosomal protein S6 kinase alpha-5 GN=RPS6KA5 OS=Gallus gallus (Chicken) PE=2 SV=1	T	Signal transduction mechanisms	PREDICTED: MAP kinase-activated protein kinase 3 isoform X3 [Gallus gallus]
gene14968	453	352	393	1058	743	123	134	136	138	101	4.68431	3.08457	3.8724	9.08357	7.98783	1.47591	1.10514	1.32502	1.93447	0.956698	0.00456808	-1.69716	down	--	--	--	K13162|0|phi:102099813|K13162 poly(rC)-binding protein 2/3/4 | (RefSeq) PCBP4; poly(rC) binding protein 4	--	[AR]	RNA processing and modification;; General function prediction only	KH domain;; KH domain;; KH domain	Heterogeneous nuclear ribonucleoprotein K GN=HNRNPK OS=Gallus gallus (Chicken) PE=2 SV=1	A	RNA processing and modification	PREDICTED: poly(rC)-binding protein 4 isoform X1 [Meleagris gallopavo]
gene14973	942	809	896	1098	1508	172	339	115	178	216	6.13725	4.7462	5.16626	5.47457	10.8553	1.272	2.16277	0.712448	1.30912	1.53835	8.50464e-06	-1.89302	down	--	--	Biological Process: neural crest cell migration (GO:0001755);; Molecular Function: receptor activity (GO:0004872);; Cellular Component: membrane (GO:0016020);; Molecular Function: chemorepellent activity (GO:0045499);; Biological Process: negative regulation of axon extension involved in axon guidance (GO:0048843);; Biological Process: negative chemotaxis (GO:0050919);;	K06840|0|mgp:100550709|K06840 semaphorin 3 | (RefSeq) SEMA3F; semaphorin 3F	--	[T]	Signal transduction mechanisms	Sema domain;; Immunoglobulin V-set domain;; Immunoglobulin domain;; Immunoglobulin I-set domain	Semaphorin-3C (Precursor) GN=SEMA3C OS=Gallus gallus (Chicken) PE=2 SV=1	T	Signal transduction mechanisms	PREDICTED: semaphorin-3F isoform X2 [Meleagris gallopavo]
gene14976	2367	1945	3159	2914	4121	724	1015	877	645	572	20.723	15.0268	24.7058	19.4015	34.1283	7.62185	7.88263	7.55359	6.69584	4.8685	0.000569634	-1.41758	down	--	--	--	K13576|0|gga:429200|K13576 solute carrier family 38 (sodium-coupled neutral amino acid transporter), member 3 | (RefSeq) SLC38A3; solute carrier family 38 member 3	--	[E]	Amino acid transport and metabolism	Transmembrane amino acid transporter protein	Sodium-coupled neutral amino acid transporter 2 GN=SLC38A2 OS=Gallus gallus (Chicken) PE=2 SV=2	E	Amino acid transport and metabolism	PREDICTED: sodium-coupled neutral amino acid transporter 3 [Meleagris gallopavo]
gene14977	526	366	635	876	685	86	88	106	117	185	4.37488	2.544	4.32155	5.47112	5.31906	0.64166	0.51078	0.666747	1.0048	1.23682	3.70964e-05	-1.90111	down	--	--	--	K06840|0|fpg:101910325|K06840 semaphorin 3 | (RefSeq) SEMA3B; semaphorin 3B	--	[T]	Signal transduction mechanisms	Sema domain	Semaphorin-3aa (Precursor) GN=sema3aa OS=Danio rerio (Zebrafish) PE=2 SV=1	T	Signal transduction mechanisms	PREDICTED: semaphorin-3B [Meleagris gallopavo]
gene14979	533	509	682	1142	609	3	3	3	25	13	9.61008	8.17554	11.0494	16.3494	11.041	0.059299	0.030822	0.035417	0.588336	0.210415	4.89821e-29	-5.59497	down	--	--	--	--	--	--	--	--	--	--	--	PREDICTED: uncharacterized protein C3orf45-like [Gallus gallus]
gene14993	17115	18300	12562	11948	7578	2653	1828	5528	2013	3599	127.781	103.273	73.9873	81.5113	48.941	29.2959	13.2277	35.6822	16.6815	27.9903	0.000987398	-1.61246	down	--	--	Cellular Component: proteinaceous extracellular matrix (GO:0005578);; Cellular Component: extracellular space (GO:0005615);; Molecular Function: growth factor activity (GO:0008083);;	K08126|0|gga:374039|K08126 osteoglycin (osteoinductive factor, mimecan) | (RefSeq) OGN, null; osteoglycin	--	[R]	General function prediction only	Leucine rich repeat;; Leucine Rich repeats (2 copies);; Leucine Rich Repeat;; Leucine rich repeats (6 copies);; Leucine rich repeat	Mimecan (Precursor) GN=OGN OS=Gallus gallus (Chicken) PE=2 SV=1	R	General function prediction only	mimecan precursor [Gallus gallus]
gene15139	302	187	244	302	159	43	28	5	34	52	2.23106	1.77874	1.66751	1.79127	1.19084	0.221462	0.129632	0.021429	0.184571	0.232716	0.000100984	-2.35817	down	--	--	--	--	--	--	--	--	--	--	--	--
gene15140	6153	3905	5388	5768	6507	1316	484	1475	1041	331	12.3713	7.23557	10.0121	8.42013	13.3096	3.20041	1.55229	2.94509	2.42097	2.22703	8.53477e-10	-2.00159	down	[R]	General function prediction only	--	K05039|0|clv:102089754|K05039 solute carrier family 6 (neurotransmitter transporter, GABA) member 6/8/11/12/13 | (RefSeq) SLC6A6; solute carrier family 6 member 6	--	[T]	Signal transduction mechanisms	Sodium:neurotransmitter symporter family	Creatine transporter OS=Torpedo marmorata (Marbled electric ray) PE=2 SV=1	P	Inorganic ion transport and metabolism	PREDICTED: sodium- and chloride-dependent taurine transporter isoform X1 [Haliaeetus leucocephalus]
gene15166	156	235	282	303	132	28	48	34	41	13	0.4719	0.653443	0.77741	0.730465	0.770585	0.194512	0.137152	0.098651	0.144487	0.037222	0.000330634	-2.18735	down	--	--	--	--	--	--	--	--	--	S	Function unknown	PREDICTED: coiled-coil domain-containing protein 36 isoform X1 [Gallus gallus]
gene15296	1505	1864	1333	1486	1037	463	427	503	251	784	5.18845	5.83091	4.22168	4.14778	3.51899	1.93912	2.20132	1.77782	1.01731	2.67577	0.00235088	-1.09959	down	--	--	--	K07526|0|amj:102569393|K07526 SLIT-ROBO Rho GTPase activating protein | (RefSeq) SRGAP3; SLIT-ROBO Rho GTPase activating protein 3	--	[Z]	Cytoskeleton	RhoGAP domain;; Fes/CIP4, and EFC/F-BAR homology domain;; SH3 domain;; Variant SH3 domain;; Variant SH3 domain	SLIT-ROBO Rho GTPase-activating protein 2 GN=srgap2 OS=Danio rerio (Zebrafish) PE=2 SV=1	T	Signal transduction mechanisms	PREDICTED: SLIT-ROBO Rho GTPase-activating protein 3-like [Alligator mississippiensis]
gene153	5104	3356	6631	7389	10775	726	879	677	564	1371	13.1375	7.42678	14.5841	15.0891	25.5067	2.0525	1.81164	1.61668	1.59256	3.26832	0.000254292	-2.51864	down	[RTKL]	General function prediction only;; Signal transduction mechanisms;; Transcription;; Replication, recombination and repair	Molecular Function: protein serine/threonine kinase activity (GO:0004674);; Molecular Function: ATP binding (GO:0005524);; Cellular Component: nucleus (GO:0005634);; Cellular Component: cytoplasm (GO:0005737);; Biological Process: protein phosphorylation (GO:0006468);; Biological Process: positive regulation of neuron projection development (GO:0010976);; Biological Process: positive regulation o…	K08794|0|gga:425522|K08794 calcium/calmodulin-dependent protein kinase I [EC:2.7.11.17] | (RefSeq) CAMK1D; calcium/calmodulin dependent protein kinase ID	--	[T]	Signal transduction mechanisms	Protein kinase domain;; Protein tyrosine kinase;; Kinase-like	CaM kinase-like vesicle-associated protein GN=camkv OS=Xenopus laevis (African clawed frog) PE=2 SV=1	T	Signal transduction mechanisms	PREDICTED: calcium/calmodulin-dependent protein kinase type 1D [Gallus gallus]
gene154	872	1296	1314	1349	1405	100	101	156	346	243	6.27248	8.48751	8.55071	7.68196	9.96038	0.766059	0.567471	1.12579	2.95504	1.76198	1.99278e-10	-2.16759	down	--	--	--	--	--	--	--	--	--	S	Function unknown	PREDICTED: coiled-coil domain-containing protein 3 [Gallus gallus]
gene15491	584	754	356	679	345	80	130	100	88	244	1.47436	1.75983	1.09655	1.35543	0.850375	0.237068	0.284122	0.250953	0.260684	0.609794	0.00154917	-1.62446	down	[S]	Function unknown	Molecular Function: calcium ion binding (GO:0005509);; Cellular Component: extracellular space (GO:0005615);; Biological Process: negative regulation of cell proliferation (GO:0008285);; Biological Process: animal organ morphogenesis (GO:0009887);; Biological Process: negative regulation of gene expression (GO:0010629);; Biological Process: negative regulation of cell growth (GO:0030308);; Biolog…	K06850|0|gga:374173|K06850 slit 3 | (RefSeq) SLIT3; slit guidance ligand 3	--	[WT]	Extracellular structures;; Signal transduction mechanisms	Leucine rich repeat;; Leucine Rich repeats (2 copies);; EGF-like domain;; Leucine Rich Repeat;; Laminin G domain;; Leucine rich repeat N-terminal domain;; Laminin G domain;; Human growth factor-like EGF;; Leucine-rich repeat;; Leucine Rich repeat;; Leucine rich repeat	Delta-like protein C (Precursor) GN=dlc OS=Danio rerio (Zebrafish) PE=2 SV=1	T	Signal transduction mechanisms	slit homolog 3 protein precursor [Gallus gallus]
gene15528	172	321	225	170	193	41	49	51	58	59	0.908378	2.17558	1.08677	0.83854	1.06067	0.244965	0.250208	0.180864	0.424498	0.394516	0.0189529	-1.5546	down	--	--	Biological Process: blood vessel remodeling (GO:0001974);; Biological Process: response to amphetamine (GO:0001975);; Biological Process: vasoconstriction of artery involved in baroreceptor response to lowering of systemic arterial blood pressure (GO:0001987);; Biological Process: positive regulation of heart rate by epinephrine-norepinephrine (GO:0001996);; Biological Process: positive regulatio…	K04136|0|mgp:100543635|K04136 adrenergic receptor alpha-1B | (RefSeq) ADRA1B; adrenoceptor alpha 1B	Calcium signaling pathway (ko04020);; Neuroactive ligand-receptor interaction (ko04080);; Adrenergic signaling in cardiomyocytes (ko04261);; Vascular smooth muscle contraction (ko04270)	[R]	General function prediction only	7 transmembrane receptor (rhodopsin family);; Serpentine type 7TM GPCR chemoreceptor Srsx	Alpha-1A adrenergic receptor GN=adra1a OS=Oryzias latipes (Medaka fish) PE=3 SV=1	T	Signal transduction mechanisms	PREDICTED: alpha-1B adrenergic receptor isoform X3 [Gallus gallus]
gene15599	808	956	743	1482	619	270	237	275	224	501	8.78596	9.33209	7.11047	12.3861	6.37348	3.4793	2.10613	2.75387	2.71402	5.33322	0.00894435	-1.10402	down	--	--	Molecular Function: actin binding (GO:0003779);; Cellular Component: cytoplasm (GO:0005737);; Biological Process: nervous system development (GO:0007399);; Biological Process: cell differentiation (GO:0030154);;	--	--	[Z]	Cytoskeleton	Cofilin/tropomyosin-type actin-binding protein	Drebrin GN=DBN1 OS=Gallus gallus (Chicken) PE=2 SV=4	Z	Cytoskeleton	drebrin [Gallus gallus]
gene15663	133	66	262	223	255	31	57	53	27	46	0.834037	0.547225	1.68569	1.16124	1.62226	0.284935	0.314631	0.383227	0.191942	0.315791	0.01717	-1.6504	down	[I]	Lipid transport and metabolism	Molecular Function: iron ion binding (GO:0005506);; Biological Process: fatty acid biosynthetic process (GO:0006633);; Cellular Component: integral component of membrane (GO:0016021);; Molecular Function: oxidoreductase activity (GO:0016491);; Biological Process: oxidation-reduction process (GO:0055114);;	K07750|0|gga:416256|K07750 methylsterol monooxygenase [EC:1.14.13.72] | (RefSeq) FAXDC2, C13H5ORF4, C5orf4; fatty acid hydroxylase domain containing 2	Steroid biosynthesis (ko00100)	[I]	Lipid transport and metabolism	Fatty acid hydroxylase superfamily	Methylsterol monooxygenase 1 GN=MSMO1 OS=Gallus gallus (Chicken) PE=2 SV=1	I	Lipid transport and metabolism	chromosome 13 open reading frame, human C5orf4 [Gallus gallus]
gene15705	2833	3698	5987	4334	5865	807	1965	718	1134	2221	24.1776	17.9102	30.779	24.9164	28.8256	5.91702	12.7728	3.74019	8.19294	10.9343	0.00506625	-1.27483	down	[RTKL]	General function prediction only;; Signal transduction mechanisms;; Transcription;; Replication, recombination and repair	Biological Process: G1/S transition of mitotic cell cycle (GO:0000082);; Molecular Function: calmodulin-dependent protein kinase activity (GO:0004683);; Molecular Function: calmodulin binding (GO:0005516);; Molecular Function: ATP binding (GO:0005524);; Biological Process: calcium ion transport (GO:0006816);; Molecular Function: glutamate receptor binding (GO:0035254);; Biological Process: protei…	K04515|0|tgu:100220435|K04515 calcium/calmodulin-dependent protein kinase (CaM kinase) II [EC:2.7.11.17] | (RefSeq) CAMK2A; calcium/calmodulin dependent protein kinase II alpha	ErbB signaling pathway (ko04012);; Calcium signaling pathway (ko04020);; Oocyte meiosis (ko04114);; Adrenergic signaling in cardiomyocytes (ko04261);; Wnt signaling pathway (ko04310);; GnRH signaling pathway (ko04912);; Melanogenesis (ko04916)	[T]	Signal transduction mechanisms	Protein kinase domain;; Calcium/calmodulin dependent protein kinase II Association;; Protein tyrosine kinase;; Domain of unknown function (DUF4440);; SnoaL-like domain	Calcium/calmodulin-dependent protein kinase type II delta chain GN=CAMK2D OS=Gallus gallus (Chicken) PE=2 SV=1	T	Signal transduction mechanisms	PREDICTED: calcium/calmodulin-dependent protein kinase type II subunit alpha isoform X2 [Melopsittacus undulatus]
gene15728	1258	1006	1469	1040	1036	584	402	427	231	302	4.99202	4.27826	5.05192	3.36607	3.75356	2.6206	1.62359	1.97447	1.26694	1.39329	0.00436057	-1.05283	down	--	--	--	K08618|0|fpg:101917429|K08618 a disintegrin and metalloproteinase with thrombospondin motifs 2 [EC:3.4.24.14] | (RefSeq) ADAMTS2; ADAM metallopeptidase with thrombospondin type 1 motif 2	--	[O]	Posttranslational modification, protein turnover, chaperones	Reprolysin family propeptide;; ADAM-TS Spacer 1;; Thrombospondin type 1 domain;; Reprolysin (M12B) family zinc metalloprotease;; Metallo-peptidase family M12;; Metallo-peptidase family M12B Reprolysin-like;; Metallo-peptidase family M12B Reprolysin-like;; Metallo-peptidase family M12B Reprolysin-like	Disintegrin-like jararhagin-C (Precursor; Fragment) OS=Bothrops jararaca (Jararaca) PE=1 SV=1	O	Posttranslational modification, protein turnover, chaperones	PREDICTED: A disintegrin and metalloproteinase with thrombospondin motifs 2 isoform X2 [Gallus gallus]
gene15747	34364	35611	29609	26154	54232	2979	3716	3069	2103	5641	420.499	398.886	325.511	252.423	649.335	42.1189	39.3595	37.1266	29.938	69.1961	1.16703e-07	-2.92257	down	--	--	--	K19875|0|gga:416299|K19875 myotilin | (RefSeq) MYOT, TTID; myotilin	--	--	--	Immunoglobulin I-set domain;; Immunoglobulin domain;; Immunoglobulin V-set domain;; Immunoglobulin domain;; Immunoglobulin domain	Myosin light chain kinase, smooth muscle, deglutamylated form GN=Mylk OS=Gallus gallus (Chicken) PE=1 SV=2	T	Signal transduction mechanisms	PREDICTED: LOW QUALITY PROTEIN: myotilin [Gallus gallus]
gene15774	353	424	304	251	145	7	7	0	0	8	3.77577	3.91298	3.54087	2.32823	1.88871	0.060177	0.087257	0	0	0.128268	1.0221e-16	-5.63305	down	--	--	Molecular Function: transcription factor activity, protein binding (GO:0000988);; Molecular Function: transcription factor activity, sequence-specific DNA binding (GO:0003700);; Cellular Component: transcription factor complex (GO:0005667);; Cellular Component: nucleolus (GO:0005730);; Cellular Component: cytoplasm (GO:0005737);; Biological Process: branchiomeric skeletal muscle development (GO:0…	K09356|6.34168e-163|tgu:100227790|K09356 paired-like homeodomain transcription factor 1 | (RefSeq) PITX1; paired like homeodomain 1	--	[K]	Transcription	Homeobox domain;; OAR domain	Pituitary homeobox 1 GN=PITX1 OS=Gallus gallus (Chicken) PE=2 SV=1	K	Transcription	paired-like homeodomain transcription factor Ptx1, partial [Gallus gallus]
gene15853	2770	4078	3350	6013	2398	513	617	772	631	2103	24.0031	31.9165	25.5542	40.0374	21.1093	5.07472	5.30151	6.67564	6.16673	17.6686	0.00099083	-1.53061	down	[F]	Nucleotide transport and metabolism	Cellular Component: cytoplasm (GO:0005737);; Biological Process: pyrimidine nucleobase catabolic process (GO:0006208);; Biological Process: nervous system development (GO:0007399);; Molecular Function: hydrolase activity, acting on carbon-nitrogen (but not peptide) bonds, in cyclic amides (GO:0016812);; Molecular Function: phosphoprotein binding (GO:0051219);;	--	--	[F]	Nucleotide transport and metabolism	Amidohydrolase family;; Amidohydrolase;; Amidohydrolase;; Amidohydrolase family;; Amidohydrolase	Dihydropyrimidinase-related protein 3 {ECO:0000250|UniProtKB:Q62952} OS=Xenopus tropicalis (Western clawed frog) PE=2 SV=1	F	Nucleotide transport and metabolism	PREDICTED: dihydropyrimidinase-related protein 3 isoform X1 [Pseudopodoces humilis]
gene16123	1002	1557	437	500	552	289	136	95	75	158	12.4732	17.6819	4.8902	4.92073	6.7118	4.24491	1.46096	1.16995	1.09717	1.94162	0.0494856	-1.91552	down	[R]	General function prediction only	Molecular Function: GTPase activity (GO:0003924);; Molecular Function: GTP binding (GO:0005525);; Biological Process: small GTPase mediated signal transduction (GO:0007264);; Cellular Component: membrane (GO:0016020);;	K07843|0|gga:416507|K07843 RAS, dexamethasone-induced Ras-related protein 1 | (RefSeq) RASD1; ras related dexamethasone induced 1	--	[R]	General function prediction only	Ras family;; Miro-like protein;; ADP-ribosylation factor family;; Elongation factor Tu GTP binding domain	Ras-related protein Rap-1b (Precursor) GN=rap1b OS=Xenopus tropicalis (Western clawed frog) PE=2 SV=1	R	General function prediction only	PREDICTED: dexamethasone-induced Ras-related protein 1 [Meleagris gallopavo]
gene16157	785	878	290	464	177	80	21	60	84	156	5.50314	5.61991	1.83158	2.58643	1.21192	0.65523	0.122522	0.413479	0.681152	1.0839	0.0305988	-2.19536	down	--	--	Cellular Component: collagen trimer (GO:0005581);;	--	--	--	--	C1q domain;; Collagen triple helix repeat (20 copies)	Cytosolic endo-beta-N-acetylglucosaminidase GN=ENGASE OS=Gallus gallus (Chicken) PE=1 SV=1	W	Extracellular structures	PREDICTED: complement C1q tumor necrosis factor-related protein 1 isoform X3 [Gallus gallus]
gene1629	6500	4440	5184	6600	4541	2045	1750	2346	524	3156	20.1324	12.4052	14.3554	16.0419	13.6711	7.38069	4.67279	7.14864	1.90347	9.74483	0.0038256	-1.00938	down	--	--	--	K06522|0|gga:418451|K06522 immunoglobulin superfamily, member 2/3 | (RefSeq) IGSF3; immunoglobulin superfamily member 3	--	--	--	Immunoglobulin V-set domain;; Immunoglobulin I-set domain;; Immunoglobulin domain;; Immunoglobulin domain;; Immunoglobulin domain;; Domain of unknown function (DUF3821);; Alphaherpesvirus glycoprotein I	Immunoglobulin superfamily member 3 (Precursor) GN=igsf3 OS=Xenopus tropicalis (Western clawed frog) PE=2 SV=1	T	Signal transduction mechanisms	PREDICTED: LOW QUALITY PROTEIN: immunoglobulin superfamily member 3 [Gallus gallus]
gene16328	552	1283	551	578	704	128	157	102	122	245	3.19543	7.08016	3.07476	2.64805	4.20528	1.11068	1.07838	0.624789	0.967263	1.59161	0.00381847	-1.81259	down	--	--	Molecular Function: nucleotide binding (GO:0000166);; Molecular Function: RNA binding (GO:0003723);; Cellular Component: nucleus (GO:0005634);; Biological Process: mRNA processing (GO:0006397);; Biological Process: regulation of RNA splicing (GO:0043484);;	K14946|0|apla:101803943|K14946 RNA binding protein fox-1 | (RefSeq) RBFOX1; RNA binding protein, fox-1 homolog 1	--	[R]	General function prediction only	Calcitonin gene-related peptide regulator C terminal;; RNA recognition motif. (a.k.a. RRM, RBD, or RNP domain);; RNA recognition motif (a.k.a. RRM, RBD, or RNP domain);; RNA recognition motif. (a.k.a. RRM, RBD, or RNP domain)	RNA binding protein fox-1 homolog 1 GN=rbfox1 OS=Danio rerio (Zebrafish) PE=2 SV=1	R	General function prediction only	PREDICTED: RNA binding protein fox-1 homolog 1 isoform X30 [Gallus gallus]
gene1660	8100	6547	8457	8474	6741	2523	2947	2318	2001	2934	39.2547	28.5242	36.7347	32.7668	31.6207	14.2377	12.2691	11.0497	11.2148	13.8694	0.000507492	-1.08967	down	[G]	Carbohydrate transport and metabolism	--	K00700|0|gga:427964|K00700 1,4-alpha-glucan branching enzyme [EC:2.4.1.18] | (RefSeq) GBE1; 1,4-alpha-glucan branching enzyme 1	Starch and sucrose metabolism (ko00500)	[G]	Carbohydrate transport and metabolism	Alpha amylase, C-terminal all-beta domain;; Alpha amylase, catalytic domain	--	G	Carbohydrate transport and metabolism	PREDICTED: 1,4-alpha-glucan-branching enzyme [Gallus gallus]
gene16628	286	243	253	377	205	17	90	126	45	104	1.61591	1.10996	1.2554	1.64056	1.14588	0.087897	0.37535	0.696524	0.267041	0.557473	0.043639	-1.37668	down	--	--	Cellular Component: nucleolus (GO:0005730);; Cellular Component: integral component of membrane (GO:0016021);; Cellular Component: nuclear membrane (GO:0031965);; Biological Process: ribosome biogenesis (GO:0042254);;	K14771|0|gga:416798|K14771 U3 small nucleolar RNA-associated protein 19 | (RefSeq) NOC4L, EP400; nucleolar complex associated 4 homolog	--	[J]	Translation, ribosomal structure and biogenesis	CBF/Mak21 family	Nucleolar complex protein 4 homolog GN=NOC4L OS=Gallus gallus (Chicken) PE=2 SV=1	J	Translation, ribosomal structure and biogenesis	nucleolar complex protein 4 homolog [Gallus gallus]
gene16645	250	112	199	216	184	56	40	45	60	58	0.906694	0.37108	0.651353	0.619469	0.653175	0.236946	0.124961	0.160426	0.255546	0.207621	0.0477879	-1.36184	down	--	--	--	K17599|0|gga:416809|K17599 transmembrane protein 132 | (RefSeq) TMEM132C; transmembrane protein 132C	--	[S]	Function unknown	--	--	S	Function unknown	PREDICTED: transmembrane protein 132C isoform X3 [Gallus gallus]
gene16774	511	849	1007	633	1066	31	132	17	173	107	1.38918	2.88651	3.90339	1.47427	4.83796	0.095108	0.30834	0.043487	0.569786	0.288875	3.073e-08	-2.63015	down	[I]	Lipid transport and metabolism	--	K01946|0|gga:430557|K01946 acetyl-CoA carboxylase / biotin carboxylase 2 [EC:6.4.1.2 6.3.4.14] | (RefSeq) ACACB; acetyl-CoA carboxylase beta	Fatty acid biosynthesis (ko00061);; Pyruvate metabolism (ko00620);; Propanoate metabolism (ko00640);; Insulin signaling pathway (ko04910);; Adipocytokine signaling pathway (ko04920)	[I]	Lipid transport and metabolism	Acetyl-CoA carboxylase, central region;; Carboxyl transferase domain;; Carbamoyl-phosphate synthase L chain, ATP binding domain;; Carbamoyl-phosphate synthase L chain, N-terminal domain;; Biotin carboxylase C-terminal domain;; Biotin-requiring enzyme;; ATP-grasp domain;; D-ala D-ala ligase C-terminus	Biotin carboxylase GN=ACAC OS=Gallus gallus (Chicken) PE=1 SV=1	I	Lipid transport and metabolism	PREDICTED: acetyl-CoA carboxylase 2 isoform X1 [Meleagris gallopavo]
gene16919	1720	787	1282	1244	996	291	283	233	298	215	4.36991	1.77749	2.88632	2.45665	2.58217	0.802403	0.592381	0.547901	0.753545	0.482413	6.79049e-05	-1.66206	down	[RTKL]	General function prediction only;; Signal transduction mechanisms;; Transcription;; Replication, recombination and repair	Biological Process: mitotic sister chromatid segregation (GO:0000070);; Biological Process: cytokinesis (GO:0000910);; Cellular Component: ruffle (GO:0001726);; Molecular Function: protein serine/threonine kinase activity (GO:0004674);; Molecular Function: GTPase regulator activity (GO:0005083);; Molecular Function: ATP binding (GO:0005524);; Molecular Function: phospholipid binding (GO:0005543);…	K16308|0|gga:416984|K16308 citron Rho-interacting kinase [EC:2.7.11.1] | (RefSeq) CIT; citron rho-interacting serine/threonine kinase	--	[T]	Signal transduction mechanisms	CNH domain;; Protein kinase domain;; Protein tyrosine kinase	RAC-beta serine/threonine-protein kinase A GN=akt2-a OS=Xenopus laevis (African clawed frog) PE=2 SV=1	T	Signal transduction mechanisms	PREDICTED: citron Rho-interacting kinase isoform X11 [Gallus gallus]
gene16938	1690	3475	2047	3477	1527	534	632	661	443	1250	24.5044	45.8999	26.709	39.8684	21.6516	9.11286	7.9223	9.51672	7.5639	17.9666	0.00510141	-1.30734	down	--	--	--	--	--	--	--	Sep15/SelM redox domain	Selenoprotein M (Precursor) GN=sepm OS=Xenopus laevis (African clawed frog) PE=2 SV=2	R	General function prediction only	selenoprotein M precursor [Gallus gallus]
gene16977	145	164	155	210	113	42	22	41	7	66	1.77283	1.47669	1.74294	2.01306	1.20795	0.506249	0.213642	0.490706	0.093404	0.705896	0.0204996	-1.66596	down	--	--	--	K05419|1.88214e-152|gga:427718|K05419 leukemia inhibitory factor | (RefSeq) LIF; leukemia inhibitory factor	Cytokine-cytokine receptor interaction (ko04060)	--	--	LIF / OSM family	--	K	Transcription	PREDICTED: leukemia inhibitory factor [Gallus gallus]
gene16979	312	339	448	469	758	59	207	132	41	165	2.7111	2.85581	3.60427	3.31078	6.55476	0.559637	1.6701	1.2041	0.394047	1.61046	0.0271552	-1.53174	down	[I]	Lipid transport and metabolism	Molecular Function: acyl-CoA dehydrogenase activity (GO:0003995);; Biological Process: oxidation-reduction process (GO:0055114);;	--	--	[I]	Lipid transport and metabolism	Acyl-CoA dehydrogenase, C-terminal domain;; Acyl-CoA dehydrogenase, middle domain;; Acyl-CoA dehydrogenase, C-terminal domain	--	I	Lipid transport and metabolism	PREDICTED: putative acyl-CoA dehydrogenase AidB-like isoform X2 [Gallus gallus]
gene17024	3097	4391	3520	4834	3827	948	1159	982	945	2703	29.4858	37.7438	29.893	36.2565	34.7517	10.508	9.47765	9.26682	10.4978	25.4868	0.00050068	-1.08203	down	--	--	--	--	--	[T]	Signal transduction mechanisms	Phospholipase B	Phospholipase B (Precursor) OS=Crotalus adamanteus (Eastern diamondback rattlesnake) PE=1 SV=1	T	Signal transduction mechanisms	PREDICTED: putative phospholipase B-like 2 [Ficedula albicollis]
gene17068	1603	1553	2424	2622	1676	494	314	608	367	1360	5.28224	5.22937	8.37833	7.30038	5.44237	1.37186	1.11263	2.67656	1.42177	4.06696	0.00122897	-1.1753	down	--	--	--	K06252|0|apla:101794275|K06252 tenascin | (RefSeq) TNXB, Tenascin-X; tenascin XB	Focal adhesion (ko04510);; ECM-receptor interaction (ko04512)	[TW]	Signal transduction mechanisms;; Extracellular structures	Fibronectin type III domain;; Fibrinogen beta and gamma chains, C-terminal globular domain;; Salmonella repeat of unknown function (DUF824);; Bacterial protein of unknown function (DUF903)	Tenascin (Precursor) GN=TNC OS=Gallus gallus (Chicken) PE=1 SV=2	W	Extracellular structures	PREDICTED: tenascin-X [Anas platyrhynchos]
gene17088	7107	6390	4261	4950	4931	716	499	1083	1199	2302	44.785	37.4331	25.9553	25.3997	33.4358	6.46858	3.59829	8.29804	9.7139	14.7732	4.07606e-06	-1.78284	down	--	--	--	--	--	[O]	Posttranslational modification, protein turnover, chaperones	SPRY-associated domain;; SPRY domain;; BRE1 E3 ubiquitin ligase	Zinc-binding protein A33 OS=Pleurodeles waltl (Iberian ribbed newt) PE=1 SV=2	O	Posttranslational modification, protein turnover, chaperones	B-butyrophilin 1 [Meleagris gallopavo]
gene17110	8828	8193	9384	10973	6317	1448	2338	1364	1917	2804	83.0505	72.3842	85.2485	87.9633	54.3453	17.0568	20.2937	12.8677	21.5293	27.85	1.36195e-08	-1.64814	down	--	--	Cellular Component: nucleus (GO:0005634);; Cellular Component: cytoplasm (GO:0005737);; Molecular Function: zinc ion binding (GO:0008270);;	K12000|0|gga:417040|K12000 tripartite motif-containing protein 7 | (RefSeq) TRIM7.1, TRIM7; tripartite motif containing 7.1	--	[O]	Posttranslational modification, protein turnover, chaperones	SPRY domain;; SPRY-associated domain;; zinc finger of C3HC4-type, RING;; Zinc finger, C3HC4 type (RING finger);; B-box zinc finger;; Zinc finger, C3HC4 type (RING finger);; Zinc finger, C3HC4 type (RING finger)	Nuclear factor 7, ovary OS=Xenopus laevis (African clawed frog) PE=2 SV=1	O	Posttranslational modification, protein turnover, chaperones	PREDICTED: tripartite motif-containing protein 7 isoform X1 [Meleagris gallopavo]
gene17265	8304	5491	7249	11323	5801	1918	2009	1771	1310	4172	67.8298	40.8058	53.2706	73.2505	46.3042	18.4413	14.0983	14.2815	12.6198	33.769	0.000245568	-1.29539	down	[GO]	Carbohydrate transport and metabolism;; Posttranslational modification, protein turnover, chaperones	Molecular Function: ATP binding (GO:0005524);; Cellular Component: integral component of membrane (GO:0016021);; Molecular Function: hydrolase activity (GO:0016787);;	K01509|0|gga:395797|K01509 adenosinetriphosphatase [EC:3.6.1.3] | (RefSeq) ENTPD2; ectonucleoside triphosphate diphosphohydrolase 2	Purine metabolism (ko00230)	[F]	Nucleotide transport and metabolism	GDA1/CD39 (nucleoside phosphatase) family	Ectonucleoside triphosphate diphosphohydrolase 2 GN=ENTPD2 OS=Gallus gallus (Chicken) PE=1 SV=2	F	Nucleotide transport and metabolism	ectonucleoside triphosphate diphosphohydrolase 2 precursor [Gallus gallus]
gene17276	4521	5851	3445	2349	5552	1010	1055	959	1131	2300	129.382	152.632	88.7436	53.1527	155.272	34.0502	26.1423	27.2953	38.1404	65.25	0.0199104	-1.30159	down	--	--	Molecular Function: transporter activity (GO:0005215);; Molecular Function: fatty acid binding (GO:0005504);; Cellular Component: extracellular space (GO:0005615);; Cellular Component: rough endoplasmic reticulum (GO:0005791);; Biological Process: lipid metabolic process (GO:0006629);; Biological Process: transport (GO:0006810);; Molecular Function: small molecule binding (GO:0036094);; Biologica…	K01830|2.43821e-124|gga:374110|K01830 prostaglandin-H2 D-isomerase [EC:5.3.99.2] | (RefSeq) PTGDS, L-PGDS, LPGDS, PDS, PGD2, PGDS, PGDS2; prostaglandin D2 synthase 21kDa (brain)	Arachidonic acid metabolism (ko00590)	--	--	Lipocalin / cytosolic fatty-acid binding protein family	Lipocalin (Precursor) OS=Bufo marinus (Giant toad) PE=1 SV=1	M	Cell wall/membrane/envelope biogenesis	prostaglandin-H2 D-isomerase precursor [Gallus gallus]
gene17322	1137	906	1030	994	1341	276	314	305	153	712	2.66164	1.97706	2.18705	1.92647	3.13688	0.7619	0.62839	0.682155	0.374921	1.6782	0.00429654	-1.19192	down	--	--	Cellular Component: nucleus (GO:0005634);; Cellular Component: cytoplasm (GO:0005737);; Biological Process: cellular response to gonadotropin stimulus (GO:0071371);; Biological Process: positive regulation of neuron migration (GO:2001224);;	--	--	--	--	--	NMDA receptor synaptonuclear signaling and neuronal migration factor GN=nsmf OS=Danio rerio (Zebrafish) PE=2 SV=1	K	Transcription	PREDICTED: NMDA receptor synaptonuclear signaling and neuronal migration factor isoform X7 [Gallus gallus]
gene17530	287	414	346	494	317	62	130	65	73	232	2.0124	2.58925	2.14374	2.68566	2.16356	0.338249	0.519435	0.3919	0.394537	1.07537	0.0457151	-1.27589	down	--	--	--	--	--	--	--	Protein-kinase domain of FAM69;; N-term cysteine-rich ER, FAM69	Protein FAM69B GN=fam69b OS=Xenopus tropicalis (Western clawed frog) PE=2 SV=1	S	Function unknown	PREDICTED: protein FAM69B isoform 2 [Gallus gallus]
gene17531	343	464	662	624	738	111	272	145	103	273	2.69231	3.34302	4.68736	3.88537	5.67384	1.02639	1.85837	1.13372	0.950987	2.12969	0.0277116	-1.19866	down	[I]	Lipid transport and metabolism	Biological Process: positive regulation of cytokine production (GO:0001819);; Molecular Function: 1-acylglycerol-3-phosphate O-acyltransferase activity (GO:0003841);; Cellular Component: endoplasmic reticulum (GO:0005783);; Biological Process: phospholipid biosynthetic process (GO:0008654);; Cellular Component: membrane (GO:0016020);;	K13509|3.83792e-171|gga:772114|K13509 lysophosphatidate acyltransferase [EC:2.3.1.51] | (RefSeq) AGPAT2; 1-acylglycerol-3-phosphate O-acyltransferase 2	Glycerolipid metabolism (ko00561);; Glycerophospholipid metabolism (ko00564)	[I]	Lipid transport and metabolism	Acyltransferase	Lysophospholipid acyltransferase LPCAT4 GN=lpcat4 OS=Xenopus tropicalis (Western clawed frog) PE=2 SV=1	I	Lipid transport and metabolism	PREDICTED: 1-acyl-sn-glycerol-3-phosphate acyltransferase beta [Gallus gallus]
gene17562	5005	3680	5285	7348	6198	957	1302	1619	1129	3364	94.3966	63.2518	89.7082	109.566	114.222	21.2749	21.2468	30.3652	25.1025	62.9019	0.000458705	-1.2596	down	[P]	Inorganic ion transport and metabolism	--	K03926|3.82048e-114|gga:417124|K03926 periplasmic divalent cation tolerance protein | (RefSeq) CUTA; cutA divalent cation tolerance homolog	--	[P]	Inorganic ion transport and metabolism	CutA1 divalent ion tolerance protein	Protein CutA homolog (Precursor) GN=cuta OS=Danio rerio (Zebrafish) PE=2 SV=1	P	Inorganic ion transport and metabolism	PREDICTED: protein CutA homolog [Gallus gallus]
gene17593	768	697	605	424	363	127	86	78	279	246	4.22541	3.49098	2.99169	1.84106	1.94163	0.818296	0.407961	0.421113	1.93314	1.33732	0.0205564	-1.27544	down	--	--	--	K20160|0|gga:417102|K20160 DENN domain-containing protein 1 | (RefSeq) DENND1A; DENN domain containing 1A	--	[T]	Signal transduction mechanisms	--	DENN domain-containing protein 1A GN=dennd1a OS=Xenopus laevis (African clawed frog) PE=2 SV=1	R	General function prediction only	PREDICTED: DENN domain-containing protein 1A [Meleagris gallopavo]
gene17665	394016	524339	276759	42942	165585	705	44132	26441	365	3155	2275.92	1619.45	844.422	115.082	548.619	18.8912	172.391	97.2918	2.87863	11.8672	0.00227742	-3.86626	down	[Z]	Cytoskeleton	Molecular Function: motor activity (GO:0003774);; Molecular Function: actin binding (GO:0003779);; Molecular Function: ATP binding (GO:0005524);; Cellular Component: myosin complex (GO:0016459);;	K10352|0|gga:768566|K10352 myosin heavy chain | (RefSeq) MYH1F; myosin, heavy chain 1F, skeletal muscle (similar to human myosin, heavy chain 1, skeletal muscle, adult)	Tight junction (ko04530)	[Z]	Cytoskeleton	Myosin tail;; Myosin head (motor domain);; Myosin N-terminal SH3-like domain	Myosin-3 GN=MYH3 OS=Gallus gallus (Chicken) PE=2 SV=3	Z	Cytoskeleton	PREDICTED: myosin-3 [Gallus gallus]
gene17673	50162	9525	50953	74415	84424	8224	7396	9408	6464	2703	170.341	29.4794	155.735	199.791	280.106	32.9245	21.7437	31.7819	25.8796	9.09695	0.00404343	-2.43341	down	[Z]	Cytoskeleton	Molecular Function: motor activity (GO:0003774);; Molecular Function: actin binding (GO:0003779);; Molecular Function: calmodulin binding (GO:0005516);; Molecular Function: ATP binding (GO:0005524);; Cellular Component: myofibril (GO:0030016);; Cellular Component: myosin filament (GO:0032982);;	K10352|0|gga:417310|K10352 myosin heavy chain | (RefSeq) MYH1C; myosin, heavy chain 1C, skeletal muscle (similar to human myosin, heavy chain 1, skeletal muscle, adult)	Tight junction (ko04530)	[Z]	Cytoskeleton	Myosin tail;; Myosin head (motor domain);; Myosin N-terminal SH3-like domain	Myosin heavy chain, skeletal muscle, adult OS=Gallus gallus (Chicken) PE=1 SV=4	Z	Cytoskeleton	myosin, heavy chain 1C, skeletal muscle (similar to human myosin, heavy chain 1, skeletal muscle, adult) [Gallus gallus]
gene17803	625	908	804	902	721	175	203	345	191	410	8.32639	10.5721	9.24128	10.4304	9.57865	2.48042	2.45002	4.53865	3.17216	5.46866	0.0170623	-1.09464	down	[IQR]	Lipid transport and metabolism;; Secondary metabolites biosynthesis, transport and catabolism;; General function prediction only	Cellular Component: cytoplasmic microtubule (GO:0005881);; Biological Process: xylulose metabolic process (GO:0005997);; Biological Process: glucose metabolic process (GO:0006006);; Molecular Function: oxidoreductase activity, acting on NAD(P)H, quinone or similar compound as acceptor (GO:0016655);; Biological Process: D-xylose metabolic process (GO:0042732);; Molecular Function: erythrulose redu…	K03331|1.21505e-178|gga:374066|K03331 L-xylulose reductase [EC:1.1.1.10] | (RefSeq) DCXR, DER, XR; dicarbonyl and L-xylulose reductase	Pentose and glucuronate interconversions (ko00040)	[Q]	Secondary metabolites biosynthesis, transport and catabolism	Enoyl-(Acyl carrier protein) reductase;; short chain dehydrogenase;; KR domain;; Shikimate / quinate 5-dehydrogenase	D-erythrulose reductase GN=DER OS=Gallus gallus (Chicken) PE=1 SV=1	Q	Secondary metabolites biosynthesis, transport and catabolism	D-erythrulose reductase [Gallus gallus]
gene17820	77	137	58	84	99	29	26	12	11	22	0.598245	0.970454	0.4083	0.51463	0.748284	0.267913	0.174385	0.093034	0.093278	0.164196	0.0229155	-1.69432	down	--	--	Cellular Component: endosome (GO:0005768);; Cellular Component: cytosol (GO:0005829);; Biological Process: intracellular protein transport (GO:0006886);; Molecular Function: protein kinase activator activity (GO:0030295);;	--	--	[U]	Intracellular trafficking, secretion, and vesicular transport	VHS domain;; GAT domain	TOM1-like protein 2 GN=tom1l2 OS=Xenopus laevis (African clawed frog) PE=2 SV=1	U	Intracellular trafficking, secretion, and vesicular transport	PREDICTED: target of myb1-like 1 isoform X2 [Gallus gallus]
gene17903	5938	7706	9395	13421	9352	2074	2017	1844	2514	1982	25.5613	29.0834	37.0453	44.6374	39.688	10.8495	7.68972	8.04619	13.2527	8.01448	2.10041e-08	-1.57903	down	--	--	Molecular Function: inward rectifier potassium channel activity (GO:0005242);; Biological Process: potassium ion transport (GO:0006813);; Biological Process: magnesium ion transport (GO:0015693);; Cellular Component: integral component of membrane (GO:0016021);; Biological Process: regulation of ion transmembrane transport (GO:0034765);; Molecular Function: identical protein binding (GO:0042802);…	K04996|0|mgp:100544982|K04996 potassium inwardly-rectifying channel subfamily J member 2 | (RefSeq) KCNJ2; potassium voltage-gated channel subfamily J member 2	--	[P]	Inorganic ion transport and metabolism	Inward rectifier potassium channel;; Inward rectifier potassium channel N-terminal	Inward rectifier potassium channel 2 GN=KCNJ2 OS=Gallus gallus (Chicken) PE=2 SV=1	P	Inorganic ion transport and metabolism	PREDICTED: inward rectifier potassium channel 2 [Meleagris gallopavo]
gene17915	524	655	432	861	613	108	245	133	114	186	5.70028	6.72983	4.28484	7.47944	6.54312	1.29273	2.32067	1.36916	1.46907	1.99096	0.00206464	-1.49538	down	--	--	Cellular Component: cytoplasm (GO:0005737);; Biological Process: Rho protein signal transduction (GO:0007266);; Biological Process: regulation of cell shape (GO:0008360);; Cellular Component: actin cytoskeleton (GO:0015629);; Cellular Component: microtubule cytoskeleton (GO:0015630);; Biological Process: positive regulation of pseudopodium assembly (GO:0031274);;	--	--	--	--	Cdc42 effector;; P21-Rho-binding domain	--	R	General function prediction only	PREDICTED: cdc42 effector protein 4 isoform X1 [Gallus gallus]
gene17928	1383	2321	1800	2712	1273	409	632	661	523	922	13.8612	19.5641	14.5507	20.0678	11.0314	5.02352	4.80206	5.74459	5.78966	7.92211	0.000814105	-1.0885	down	--	--	--	K10993|0|gga:100049617|K10993 fanconi anemia core complex 100 kDa subunit | (RefSeq) FAAP100, C17orf70, C18H17orf70; Fanconi anemia core complex associated protein 100	Fanconi anemia pathway (ko03460)	--	--	Fanconi anemia-associated	--	S	Function unknown	Fanconi anemia-associated protein of 100 kDa [Gallus gallus]
gene17961	15372	16988	17280	20721	13084	3571	5284	4943	4517	11174	356.278	148.996	356.315	368.697	287.807	44.4051	109.593	117.579	129.547	126.396	0.00502383	-1.03002	down	--	--	Molecular Function: integrin binding (GO:0005178);; Cellular Component: basement membrane (GO:0005604);; Molecular Function: enzyme activator activity (GO:0008047);; Molecular Function: metalloendopeptidase inhibitor activity (GO:0008191);; Biological Process: negative regulation of cell proliferation (GO:0008285);; Cellular Component: cell surface (GO:0009986);; Biological Process: regulation of…	--	--	[R]	General function prediction only	Tissue inhibitor of metalloproteinase	Metalloproteinase inhibitor 2 (Precursor) GN=TIMP2 OS=Gallus gallus (Chicken) PE=2 SV=1	R	General function prediction only	metalloproteinase inhibitor 2 precursor [Gallus gallus]
gene17966	794	1345	506	647	411	168	168	158	203	238	8.93306	13.8036	5.121	5.75864	4.52126	2.22938	1.63067	1.76608	2.68861	2.65053	0.0412182	-1.47551	down	--	--	Biological Process: regulation of protein phosphorylation (GO:0001932);; Biological Process: protein ubiquitination (GO:0016567);; Biological Process: intracellular signal transduction (GO:0035556);; Biological Process: regulation of growth (GO:0040008);; Biological Process: positive regulation of cell differentiation (GO:0045597);; Biological Process: negative regulation of insulin receptor sign…	K04696|2.9469e-134|gga:395299|K04696 suppressor of cytokine signaling 3 | (RefSeq) SOCS3, null; suppressor of cytokine signaling 3	Ubiquitin mediated proteolysis (ko04120);; Insulin signaling pathway (ko04910);; Adipocytokine signaling pathway (ko04920);; Influenza A (ko05164);; Herpes simplex infection (ko05168)	[T]	Signal transduction mechanisms	SH2 domain;; SOCS box	Suppressor of cytokine signaling 3 GN=SOCS3 OS=Gallus gallus (Chicken) PE=2 SV=1	T	Signal transduction mechanisms	suppressor of cytokine signaling 3 [Gallus gallus]
gene18008	13207	12161	11650	11916	10500	2567	2348	2978	2219	8456	124.933	104.853	99.1799	89.1157	97.0416	28.6153	19.2266	28.0208	24.7427	79.3017	0.000304695	-1.23747	down	[S]	Function unknown	--	K06248|0|gga:769665|K06248 chondroadherin | (RefSeq) CHAD; chondroadherin	Focal adhesion (ko04510);; ECM-receptor interaction (ko04512)	[R]	General function prediction only	Leucine rich repeat;; Leucine Rich repeats (2 copies);; Leucine Rich Repeat;; Leucine rich repeats (6 copies);; Leucine rich repeat N-terminal domain;; Leucine Rich repeat;; Leucine rich repeat	Leucine-rich repeat and immunoglobulin-like domain-containing nogo receptor-interacting protein 1 (Precursor) GN=lingo1 OS=Xenopus tropicalis (Western clawed frog) PE=2 SV=1	R	General function prediction only	PREDICTED: chondroadherin isoform X1 [Gallus gallus]
gene18145	1120	1957	1525	1257	662	444	499	493	217	611	5.84579	9.47949	7.24197	5.26902	3.39751	2.72076	2.30762	2.57491	1.37419	3.14978	0.0309596	-1.03858	down	--	--	Cellular Component: Golgi apparatus (GO:0005794);; Biological Process: protein glycosylation (GO:0006486);; Cellular Component: integral component of membrane (GO:0016021);; Molecular Function: transferase activity, transferring glycosyl groups (GO:0016757);;	K00710|0|clv:102091331|K00710 polypeptide N-acetylgalactosaminyltransferase [EC:2.4.1.41] | (RefSeq) WBSCR17; Williams-Beuren syndrome chromosome region 17	Mucin type O-Glycan biosynthesis (ko00512)	[O]	Posttranslational modification, protein turnover, chaperones	Glycosyl transferase family 2;; Ricin-type beta-trefoil lectin domain;; Glycosyltransferase like family 2	Polypeptide N-acetylgalactosaminyltransferase 11 GN=galnt11 OS=Xenopus tropicalis (Western clawed frog) PE=1 SV=2	O	Posttranslational modification, protein turnover, chaperones	PREDICTED: Williams-Beuren syndrome chromosome region 17 isoform X2 [Gallus gallus]
gene18226	430	479	432	863	469	115	196	110	188	260	4.53677	5.73492	4.87593	8.93429	6.04894	1.80294	1.73476	1.44381	2.82772	3.46913	0.0372274	-1.11125	down	[L]	Replication, recombination and repair	Molecular Function: DNA binding (GO:0003677);; Molecular Function: ATP binding (GO:0005524);; Biological Process: DNA metabolic process (GO:0006259);; Molecular Function: DNA-dependent ATPase activity (GO:0008094);;	K10871|0|gga:417528|K10871 RAD51-like protein 3 | (RefSeq) RAD51D, RAD51L3; RAD51 paralog D	Homologous recombination (ko03440)	[L]	Replication, recombination and repair	Rad51;; AAA domain;; DnaB-like helicase C terminal domain;; KaiC;; ATPase family associated with various cellular activities (AAA)	DNA repair protein RAD51 homolog 1 GN=RAD51A OS=Gallus gallus (Chicken) PE=2 SV=1	L	Replication, recombination and repair	DNA repair protein RAD51 homolog 4 [Gallus gallus]
gene18262	1258	1049	1231	1599	1135	314	523	370	268	524	6.5763	5.00452	5.79631	6.61069	5.79713	1.93422	2.36667	1.92413	1.64801	2.71573	0.00179822	-1.17016	down	--	--	--	--	--	--	--	--	--	S	Function unknown	PREDICTED: leucine-rich repeat-containing protein FAM211A [Gallus gallus]
gene18377	143	101	106	183	243	8	21	0	6	22	1.62406	1.05642	1.08862	1.5165	2.70701	0.077382	0.164986	0	0.055055	0.199712	1.43783e-06	-3.36607	down	[V]	Defense mechanisms	Biological Process: drug transmembrane transport (GO:0006855);; Molecular Function: drug transmembrane transporter activity (GO:0015238);; Molecular Function: antiporter activity (GO:0015297);; Cellular Component: membrane (GO:0016020);;	K03327|0|gga:417616|K03327 multidrug resistance protein, MATE family | (RefSeq) SLC47A2; solute carrier family 47 member 2	--	[R]	General function prediction only	MatE	Multidrug and toxin extrusion protein 1 GN=slc47a1 OS=Danio rerio (Zebrafish) PE=2 SV=1	P	Inorganic ion transport and metabolism	PREDICTED: multidrug and toxin extrusion protein 1-like isoform X2 [Meleagris gallopavo]
gene18419	200	261	244	146	130	0	0	0	0	0	1.40591	1.45377	1.6824	0.994993	0.789779	0	0	0	0	0	8.98363e-24	#NAME?	down	--	--	--	K10178|0|gga:373989|K10178 T-box protein 4 | (RefSeq) TBX4; T-box 4	--	[K]	Transcription	T-box	T-box transcription factor TBX5 GN=TBX5 OS=Gallus gallus (Chicken) PE=1 SV=1	K	Transcription	T-box transcription factor TBX4 [Gallus gallus]
gene18478	308	257	428	613	158	60	121	23	100	44	1.33898	1.42829	1.70086	2.25591	1.05094	0.29877	0.90066	0.093712	0.526058	0.200047	0.00286561	-1.76954	down	--	--	Molecular Function: GTPase activator activity (GO:0005096);; Cellular Component: cytoplasm (GO:0005737);; Cellular Component: centrosome (GO:0005813);; Biological Process: regulation of small GTPase mediated signal transduction (GO:0051056);;	K17708|0|mgp:100547752|K17708 RAP1 GTPase activating protein 2 | (RefSeq) RAP1GAP2; RAP1 GTPase activating protein 2	--	[T]	Signal transduction mechanisms	Rap/ran-GAP	Rap1 GTPase-activating protein 2 GN=RAP1GAP2 OS=Gallus gallus (Chicken) PE=2 SV=2	T	Signal transduction mechanisms	PREDICTED: rap1 GTPase-activating protein 2, partial [Cuculus canorus]
gene18491	97030	50455	90115	117469	86009	20505	22024	18406	16294	19353	487.193	225.508	405.271	466.925	421.416	120.646	96.1125	90.4959	95.8925	93.9897	7.31635e-07	-1.67423	down	[Z]	Cytoskeleton	--	--	--	[R]	General function prediction only	Calponin homology (CH) domain;; CAMSAP CH domain	Cytospin-A GN=specc1l OS=Xenopus tropicalis (Western clawed frog) PE=2 SV=1	Z	Cytoskeleton	PREDICTED: smoothelin-like protein 2-like isoform X4 [Gallus gallus]
gene186	6333	14029	9127	8002	8067	1755	1936	862	971	1791	31.8775	64.2123	41.3872	31.8419	39.6346	10.3786	8.41738	4.35371	5.7386	9.04722	5.53205e-07	-2.14495	down	--	--	Biological Process: negative regulation of transcription from RNA polymerase II promoter (GO:0000122);; Biological Process: positive regulation of cell-matrix adhesion (GO:0001954);; Molecular Function: low-density lipoprotein receptor activity (GO:0005041);; Cellular Component: Golgi apparatus (GO:0005794);; Biological Process: phagocytosis, recognition (GO:0006910);; Biological Process: cell su…	K06259|0|gga:417730|K06259 CD36 antigen | (RefSeq) CD36; CD36 molecule	PPAR signaling pathway (ko03320);; Phagosome (ko04145);; ECM-receptor interaction (ko04512);; Adipocytokine signaling pathway (ko04920)	[T]	Signal transduction mechanisms	CD36 family	--	T	Signal transduction mechanisms	platelet glycoprotein 4 [Gallus gallus]
gene18884	399	1131	758	832	465	222	294	236	176	289	5.08273	12.812	8.48899	8.46372	5.81459	3.36305	3.26322	2.99067	2.62317	3.69372	0.0334315	-1.04796	down	[R]	General function prediction only	--	K07847|3.39372e-169|gga:419274|K07847 Rad and Gem related GTP binding protein 1 | (RefSeq) REM1; RRAD and GEM like GTPase 1	--	[R]	General function prediction only	Ras family;; Miro-like protein;; Ferrous iron transport protein B	Ras-related protein O-RAL (Precursor) OS=Diplobatis ommata (Ocellated electric ray) PE=2 SV=1	R	General function prediction only	PREDICTED: GTP-binding protein REM 1 [Meleagris gallopavo]
gene19182	809	750	1077	1338	1572	284	314	357	257	336	6.1019	5.35414	7.30478	8.38027	11.5521	2.43811	2.01662	2.57597	2.1556	2.15722	0.00114745	-1.33677	down	--	--	Cellular Component: intracellular (GO:0005622);; Molecular Function: zinc ion binding (GO:0008270);;	--	--	--	--	B-box zinc finger;; Zinc finger, C3HC4 type (RING finger);; FHA Ki67 binding domain of hNIFK	Zinc-binding protein A33 OS=Pleurodeles waltl (Iberian ribbed newt) PE=1 SV=2	O	Posttranslational modification, protein turnover, chaperones	PREDICTED: RING finger protein 207 isoform X4 [Gallus gallus]
gene19185	613	513	759	891	560	168	196	219	137	218	3.82546	2.85974	4.4411	4.62299	3.59	1.24772	1.09634	1.3646	1.02548	1.39781	0.00443432	-1.32011	down	[C]	Energy production and conversion	Molecular Function: voltage-gated potassium channel activity (GO:0005249);; Cellular Component: cytoplasm (GO:0005737);; Biological Process: potassium ion transport (GO:0006813);; Cellular Component: integral component of membrane (GO:0016021);; Biological Process: regulation of ion transmembrane transport (GO:0034765);;	K04883|0|pon:100173715|K04883 potassium voltage-gated channel Shaker-related subfamily A, beta member 2 | (RefSeq) KCNAB2; potassium voltage-gated channel subfamily A regulatory beta subunit 2	--	[C]	Energy production and conversion	Aldo/keto reductase family	Voltage-gated potassium channel subunit beta-2 GN=kcnab2 OS=Xenopus laevis (African clawed frog) PE=2 SV=1	P	Inorganic ion transport and metabolism	PREDICTED: voltage-gated potassium channel subunit beta-2 isoform X3 [Zonotrichia albicollis]
gene19330	681	844	501	746	429	136	235	185	128	322	15.2355	16.5021	9.70081	12.3895	8.77416	3.6246	4.29649	4.08361	3.3865	7.13967	0.016932	-1.20692	down	--	--	--	--	--	--	--	Microfibril-associated glycoprotein (MAGP)	--	R	General function prediction only	PREDICTED: microfibrillar-associated protein 2 isoform X1 [Gallus gallus]
gene19344	4550	2907	4843	6081	3660	1324	905	1418	1108	2921	45.1058	28.4184	46.845	51.2552	38.3666	16.3821	8.51108	14.8517	14.0502	30.8458	0.00327381	-1.0312	down	--	--	Cellular Component: extracellular region (GO:0005576);; Molecular Function: morphogen activity (GO:0016015);; Biological Process: sequestering of BMP in extracellular matrix (GO:0035582);; Molecular Function: BMP binding (GO:0036122);; Biological Process: positive regulation of neuron differentiation (GO:0045666);; Biological Process: determination of dorsal identity (GO:0048263);; Biological Pro…	K19558|3.79496e-114|gga:373952|K19558 neuroblastoma suppressor of tumorigenicity 1 | (RefSeq) NBL1, MINOS1-NBL1; neuroblastoma 1, DAN family BMP antagonist	TGF-beta signaling pathway (ko04350)	--	--	DAN domain;; Cystine-knot domain	Neuroblastoma suppressor of tumorigenicity 1 (Precursor) GN=NBL1 OS=Gallus gallus (Chicken) PE=2 SV=2	R	General function prediction only	PREDICTED: neuroblastoma suppressor of tumorigenicity 1 [Meleagris gallopavo]
gene19414	1269	979	2176	1659	1126	562	733	265	133	836	2.73685	1.7659	4.27104	2.61115	2.49187	1.31199	1.26176	1.4343	0.852237	1.41877	0.0415248	-1.05075	down	[RTKL]	General function prediction only;; Signal transduction mechanisms;; Transcription;; Replication, recombination and repair	Biological Process: angiogenesis (GO:0001525);; Molecular Function: transmembrane-ephrin receptor activity (GO:0005005);; Molecular Function: receptor binding (GO:0005102);; Molecular Function: ATP binding (GO:0005524);; Cellular Component: integral component of plasma membrane (GO:0005887);; Biological Process: axonal fasciculation (GO:0007413);; Biological Process: learning (GO:0007612);; Molec…	K05111|0|gga:396513|K05111 Eph receptor B2 [EC:2.7.10.1] | (RefSeq) EPHB2; EPH receptor B2	--	[T]	Signal transduction mechanisms	Protein tyrosine kinase;; Ephrin receptor ligand binding domain;; Protein kinase domain;; Fibronectin type III domain;; Ephrin type-A receptor 2 transmembrane domain;; SAM domain (Sterile alpha motif);; SAM domain (Sterile alpha motif);; GCC2 and GCC3	Ephrin type-B receptor 2 (Precursor) GN=EPHB2 OS=Gallus gallus (Chicken) PE=1 SV=3	T	Signal transduction mechanisms	RecName: Full=Ephrin type-B receptor 2; AltName: Full=EPH-like kinase 5; Short=EK5; Short=cEK5; Flags: Precursor [Gallus gallus]
gene19450	548	95	204	82	179	7	8	0	7	5	1.26824	0.170465	0.396049	0.144827	0.432223	0.014387	0.012327	0	0.014356	0.01712	0.0120101	-4.88004	down	[Z]	Cytoskeleton	--	--	--	--	--	Kinesin motor domain	Kinesin-like protein kif7 GN=kif7 OS=Danio rerio (Zebrafish) PE=1 SV=1	Z	Cytoskeleton	PREDICTED: LOW QUALITY PROTEIN: kinesin family member 17 [Gallus gallus]
gene1950	1625	1158	1192	1545	3567	140	253	303	120	522	10.8972	4.56596	8.45603	8.42798	19.1421	1.69551	1.92981	1.37689	0.909981	3.99796	0.0270605	-2.36522	down	[K]	Transcription	Biological Process: neuron migration (GO:0001764);; Molecular Function: chromatin binding (GO:0003682);; Molecular Function: transcription factor activity, sequence-specific DNA binding (GO:0003700);; Cellular Component: nucleus (GO:0005634);; Biological Process: regulation of transcription, DNA-templated (GO:0006355);; Biological Process: axon guidance (GO:0007411);; Biological Process: globus p…	K09452|1.63011e-84|lcm:102355503|K09452 homeobox protein aristaless-related | (RefSeq) ARX; aristaless related homeobox	--	[R]	General function prediction only	Homeobox domain;; OAR domain	Aristaless-related homeobox protein GN=arx OS=Danio rerio (Zebrafish) PE=2 SV=1	K	Transcription	PREDICTED: aristaless-related homeobox protein-like [Latimeria chalumnae]
gene19539	1262	2029	2249	2035	1456	357	688	658	274	739	8.77418	12.859	14.0787	11.1864	9.88965	2.92746	4.14314	4.55297	2.24166	5.09139	0.00013467	-1.26039	down	--	--	Molecular Function: receptor activity (GO:0004872);; Cellular Component: plasma membrane (GO:0005886);; Cellular Component: anchored component of membrane (GO:0031225);;	--	--	--	--	GDNF/GAS1 domain	GDNF family receptor alpha-2 (Precursor) GN=GFRA2 OS=Gallus gallus (Chicken) PE=2 SV=1	T	Signal transduction mechanisms	GDNF family receptor alpha-2 precursor [Gallus gallus]
gene19548	2170	2758	3061	3926	3019	346	561	345	209	1143	29.2683	33.2335	36.2431	41.7033	38.8018	5.36295	6.38236	4.5053	3.23952	14.9075	2.92348e-13	-2.08469	down	[T]	Signal transduction mechanisms	Molecular Function: protein tyrosine phosphatase activity (GO:0004725);; Cellular Component: mitochondrion (GO:0005739);; Molecular Function: protein tyrosine/serine/threonine phosphatase activity (GO:0008138);; Biological Process: peptidyl-tyrosine dephosphorylation (GO:0035335);;	K14165|4.87976e-157|apla:101804841|K14165 atypical dual specificity phosphatase [EC:3.1.3.16 3.1.3.48] | (RefSeq) DUSP26; dual specificity phosphatase 26	--	[V]	Defense mechanisms	Dual specificity phosphatase, catalytic domain	Dual specificity phosphatase DUPD1 GN=DUPD1 OS=Anolis carolinensis (Green anole) PE=3 SV=1	V	Defense mechanisms	PREDICTED: LOW QUALITY PROTEIN: dual specificity protein phosphatase 26 [Cuculus canorus]
gene19557	1661	1067	2136	2071	1678	204	350	291	236	411	3.99483	4.94897	4.62304	3.93984	3.94759	1.76893	2.03181	1.5054	0.701031	1.0023	8.43621e-11	-2.04533	down	--	--	Cellular Component: histone deacetylase complex (GO:0000118);; Molecular Function: nucleic acid binding (GO:0003676);; Cellular Component: cytoplasm (GO:0005737);; Biological Process: positive regulation of cell proliferation (GO:0008284);; Biological Process: regulation of transforming growth factor beta receptor signaling pathway (GO:0017015);; Biological Process: cell differentiation (GO:00301…	--	--	--	--	NocA-like zinc-finger protein 1	Zinc finger protein 703 GN=znf703 OS=Xenopus tropicalis (Western clawed frog) PE=2 SV=1	K	Transcription	PREDICTED: zinc finger protein 703 [Pseudopodoces humilis]
gene19728	8097	11043	7365	10052	13840	3659	3722	3184	2373	5199	411.049	510.981	336.518	403.447	686.477	218.977	163.58	160.798	141.995	261.63	0.0105042	-1.00226	down	--	--	Molecular Function: transporter activity (GO:0005215);; Biological Process: transport (GO:0006810);; Molecular Function: cytoskeletal protein binding (GO:0008092);; Molecular Function: lipid binding (GO:0008289);;	K08752|6.29642e-90|gga:419557|K08752 fatty acid-binding protein 3, muscle and heart | (RefSeq) FABP3, FABP, H-FABP; fatty acid binding protein 3	PPAR signaling pathway (ko03320)	[I]	Lipid transport and metabolism	Lipocalin / cytosolic fatty-acid binding protein family;; Lipocalin / cytosolic fatty-acid binding protein family	Fatty acid-binding protein, heart GN=fabp3 OS=Oncorhynchus mykiss (Rainbow trout) PE=2 SV=3	I	Lipid transport and metabolism	heart fatty acid binding protein [Gallus gallus]
gene1974	5118	3623	3809	8840	5770	221	460	251	489	1505	74.9569	46.5641	48.0346	107.674	78.3591	3.54861	3.93179	2.17988	5.88237	20.3401	3.88645e-08	-2.77417	down	--	--	Cellular Component: nucleus (GO:0005634);; Cellular Component: muscle tendon junction (GO:0005927);; Cellular Component: M band (GO:0031430);; Cellular Component: costamere (GO:0043034);;	--	--	--	--	Stretch-responsive small skeletal muscle X protein, Chisel	--	S	Function unknown	PREDICTED: small muscular protein [Struthio camelus australis]
gene19792	2324	2384	2008	2130	1536	651	642	604	489	1336	11.4089	10.4596	8.67972	8.09714	7.26252	3.76698	2.67879	2.89872	2.78626	6.36053	0.00254353	-1.011	down	[U]	Intracellular trafficking, secretion, and vesicular transport	--	K12488|0|fch:102058189|K12488 Arf-GAP with SH3 domain, ANK repeat and PH domain-containing protein | (RefSeq) ASAP3; ArfGAP with SH3 domain, ankyrin repeat and PH domain 3	Endocytosis (ko04144)	[T]	Signal transduction mechanisms	Putative GTPase activating protein for Arf;; PH domain;; Ankyrin repeats (3 copies);; Ankyrin repeat;; Variant SH3 domain;; Variant SH3 domain;; Ankyrin repeats (many copies);; Ankyrin repeats (many copies);; Ankyrin repeat	Arf-GAP with coiled-coil, ANK repeat and PH domain-containing protein 2 GN=ACAP2 OS=Gallus gallus (Chicken) PE=2 SV=1	T	Signal transduction mechanisms	PREDICTED: arf-GAP with SH3 domain, ANK repeat and PH domain-containing protein 3, partial [Meleagris gallopavo]
gene19848	5571	7106	17186	19328	11524	1540	2563	1982	1901	2151	50.8882	59.3323	140.776	139.326	102.537	16.8593	20.5567	18.306	20.7903	19.9738	0.000534488	-2.04757	down	--	--	Cellular Component: stress fiber (GO:0001725);; Molecular Function: actin binding (GO:0003779);; Cellular Component: nucleus (GO:0005634);; Molecular Function: zinc ion binding (GO:0008270);; Cellular Component: Z disc (GO:0030018);; Biological Process: actin cytoskeleton organization (GO:0030036);;	--	--	[TZR]	Signal transduction mechanisms;; Cytoskeleton;; General function prediction only	LIM domain	PDZ and LIM domain protein 7 GN=pdlim7 OS=Danio rerio (Zebrafish) PE=2 SV=1	TZ	Signal transduction mechanisms;; Cytoskeleton	PREDICTED: four and a half LIM domains protein 3 isoform X3 [Gallus gallus]
gene19876	885	742	932	528	416	161	108	123	117	187	3.62601	2.77038	3.43552	1.70854	1.66383	0.777607	0.381983	0.500213	0.565314	0.757594	2.69558e-05	-1.82345	down	--	--	--	--	--	--	--	Collagen triple helix repeat (20 copies);; C1q domain	Collagen alpha-1(X) chain (Precursor) GN=COL10A1 OS=Gallus gallus (Chicken) PE=1 SV=4	W	Extracellular structures	PREDICTED: collagen alpha-2(VIII) chain [Gallus gallus]
gene19896	705	565	588	1373	781	302	165	161	301	451	20.392	14.8737	15.3273	31.4641	22.0968	10.249	4.09594	4.59477	10.2435	12.9127	0.0389175	-1.00237	down	--	--	--	--	--	--	--	DoxX-like family;; DoxX	--	R	General function prediction only	PREDICTED: uncharacterized protein LOC100857984 isoform X1 [Gallus gallus]
gene19943	418	429	551	638	483	117	169	164	89	201	1.88541	1.76833	2.2367	2.33617	2.13892	0.613355	0.671347	0.701077	0.46903	0.894468	0.018202	-1.2835	down	--	--	--	--	--	--	--	NHS-like	Uncharacterized protein KIAA1522 homolog GN=si:ch211-194e15.5 OS=Danio rerio (Zebrafish) PE=4 SV=1	S	Function unknown	PREDICTED: uncharacterized protein KIAA1522 isoform X4 [Gallus gallus]
gene20041	864	485	836	590	833	268	81	239	85	293	2.53258	1.82146	2.42236	1.54559	2.96287	1.19562	0.192656	0.973228	0.270335	0.796708	0.00150811	-1.41304	down	--	--	--	--	--	--	--	--	--	--	--	--
gene20078	190	440	477	388	442	51	32	162	60	121	3.0513	5.19416	4.7321	4.9322	5.29817	1.15123	0.548971	1.36045	1.14133	1.32955	0.00258272	-1.68399	down	--	--	Biological Process: negative regulation of transcription from RNA polymerase II promoter (GO:0000122);; Molecular Function: transcription regulatory region sequence-specific DNA binding (GO:0000976);; Biological Process: cartilage condensation (GO:0001502);; Molecular Function: chromatin binding (GO:0003682);; Molecular Function: transcription factor activity, sequence-specific DNA binding (GO:00…	K09361|2.00471e-156|gga:395714|K09361 BarH-like homeobox | (RefSeq) BARX2, BARX2B; BARX homeobox 2	--	[R]	General function prediction only	Homeobox domain	Homeobox protein BarH-like 1 GN=barx1 OS=Danio rerio (Zebrafish) PE=2 SV=2	K	Transcription	homeobox protein BarH-like 2 [Gallus gallus]
gene20089	4269	3773	4425	4856	3440	1084	1369	1423	917	1969	17.3823	14.0014	16.216	15.6332	13.6842	5.20229	4.82489	5.76295	4.39931	7.94823	0.000146703	-1.13546	down	--	--	Molecular Function: metalloendopeptidase activity (GO:0004222);; Cellular Component: proteinaceous extracellular matrix (GO:0005578);; Biological Process: proteolysis (GO:0006508);; Molecular Function: zinc ion binding (GO:0008270);;	K08629|0|gga:419733|K08629 a disintegrin and metalloproteinase with thrombospondin motifs 15 [EC:3.4.24.-] | (RefSeq) ADAMTS15; ADAM metallopeptidase with thrombospondin type 1 motif, 15	--	[O]	Posttranslational modification, protein turnover, chaperones	ADAM-TS Spacer 1;; Reprolysin family propeptide;; Reprolysin (M12B) family zinc metalloprotease;; Thrombospondin type 1 domain;; Metallo-peptidase family M12;; Metallo-peptidase family M12B Reprolysin-like;; Metallo-peptidase family M12B Reprolysin-like	Disintegrin acugrin (Precursor) OS=Deinagkistrodon acutus (Hundred-pace snake) PE=1 SV=1	O	Posttranslational modification, protein turnover, chaperones	PREDICTED: A disintegrin and metalloproteinase with thrombospondin motifs 15 [Gallus gallus]
gene20145	179	78	286	180	214	29	6	26	41	52	1.5532	0.728117	2.29862	1.2191	1.86788	0.301218	0.070857	0.227322	0.404187	0.627067	0.00119638	-2.07141	down	--	--	--	--	--	[H]	Coenzyme transport and metabolism	CUB domain;; Fz domain;; Low-density lipoprotein receptor domain class A;; CUB-like domain	Bone morphogenetic protein 1 (Precursor) GN=bmp1 OS=Xenopus laevis (African clawed frog) PE=1 SV=1	HT	Coenzyme transport and metabolism;; Signal transduction mechanisms	PREDICTED: membrane frizzled-related protein isoform X1 [Gallus gallus]
gene20146	720	1439	887	1156	690	177	282	344	188	645	10.2322	18.6439	11.3535	12.9929	9.57842	2.96154	3.47021	4.86169	3.1448	9.09189	0.0186648	-1.12243	down	--	--	Cellular Component: collagen trimer (GO:0005581);;	--	--	--	--	C1q domain;; Collagen triple helix repeat (20 copies)	Otolin-1 (Precursor) GN=otol1 OS=Oncorhynchus keta (Chum salmon) PE=1 SV=1	W	Extracellular structures	PREDICTED: complement C1q tumor necrosis factor-related protein 5 isoform X1 [Gallus gallus]
gene20177	2197	1443	1570	1525	2188	537	649	521	468	603	11.6586	6.89313	7.43936	6.3728	11.3453	3.30773	2.96484	2.74046	2.9084	3.15315	0.000483405	-1.2026	down	--	--	--	K06781|0|gga:419762|K06781 cell adhesion molecule 1 | (RefSeq) CADM1, IGSF4, Necl-2, RA175, SgIGSF, SynCAM1, TSLC1; cell adhesion molecule 1	Cell adhesion molecules (CAMs) (ko04514)	--	--	Immunoglobulin domain;; Immunoglobulin I-set domain;; Immunoglobulin V-set domain;; Immunoglobulin domain;; Immunoglobulin domain;; CD80-like C2-set immunoglobulin domain	Cell adhesion molecule 2 (Precursor) GN=cadm2 OS=Xenopus tropicalis (Western clawed frog) PE=2 SV=1	T	Signal transduction mechanisms	PREDICTED: cell adhesion molecule 1 isoform X1 [Meleagris gallopavo]
gene20192	2834	6492	3392	7163	2754	1187	1625	1556	1104	2065	47.5336	99.4572	51.185	95.1972	45.2446	23.4468	23.6081	26.0054	21.8272	34.3822	0.0461315	-1.07416	down	--	--	Cellular Component: cytoplasm (GO:0005737);; Biological Process: muscle organ development (GO:0007517);;	K20526|3.06022e-144|mgp:100548009|K20526 transgelin | (RefSeq) TAGLN; transgelin	--	[Z]	Cytoskeleton	Calponin family repeat;; Calponin homology (CH) domain	Transgelin GN=TAGLN OS=Gallus gallus (Chicken) PE=1 SV=3	Z	Cytoskeleton	transgelin [Gallus gallus]
gene202	1969	2955	1921	3713	911	552	750	882	387	907	20.1011	28.3592	16.0652	27.6606	8.94817	6.63612	5.42934	8.81573	4.55915	9.52164	0.0277362	-1.2135	down	--	--	Cellular Component: extracellular space (GO:0005615);; Biological Process: negative regulation of osteoclast differentiation (GO:0045671);; Biological Process: bone marrow development (GO:0048539);;	--	--	[R]	General function prediction only	Leucine rich repeat;; Leucine Rich repeats (2 copies);; Leucine rich repeats (6 copies);; Leucine Rich Repeat;; Leucine-rich repeat;; Leucine Rich repeat	Leucine-rich repeat-containing protein 3 (Precursor) GN=lrrc3 OS=Danio rerio (Zebrafish) PE=2 SV=1	R	General function prediction only	leucine-rich repeat-containing protein 17 precursor [Gallus gallus]
gene20242	939	884	1313	1535	1096	266	267	351	393	456	4.71145	3.74368	6.30388	6.06248	5.89413	1.6871	1.06202	1.55459	2.22054	2.28024	0.000987398	-1.20567	down	--	--	Biological Process: MAPK cascade (GO:0000165);; Biological Process: angiogenesis (GO:0001525);; Molecular Function: cytokine activity (GO:0005125);; Cellular Component: extracellular space (GO:0005615);; Biological Process: inflammatory response (GO:0006954);; Biological Process: positive regulation of gene expression (GO:0010628);; Biological Process: regulation of cell adhesion (GO:0030155);; B…	K05482|6.68977e-132|gga:395312|K05482 interleukin 18 | (RefSeq) IL18, ChIL-18, IL-18, interleukin-18; interleukin 18	Cytokine-cytokine receptor interaction (ko04060);; NOD-like receptor signaling pathway (ko04621);; Cytosolic DNA-sensing pathway (ko04623);; Salmonella infection (ko05132);; Influenza A (ko05164)	--	--	Interleukin-1 / 18	Interleukin-18 (Precursor) GN=IL18 OS=Gallus gallus (Chicken) PE=2 SV=1	T	Signal transduction mechanisms	interleukin-18 [Gallus gallus]
gene20545	3240	4911	3058	4389	2123	1014	894	1128	776	2488	51.6949	73.4323	45.0788	56.637	33.879	19.0642	12.3375	18.0187	15.0575	40.447	0.0248607	-1.01636	down	--	--	--	K01371|0|apla:101794155|K01371 cathepsin K [EC:3.4.22.38] | (RefSeq) CTSK; cathepsin K	Lysosome (ko04142);; Apoptosis (ko04210);; Toll-like receptor signaling pathway (ko04620)	[O]	Posttranslational modification, protein turnover, chaperones	Papain family cysteine protease;; Cathepsin propeptide inhibitor domain (I29);; Peptidase C1-like family	Cathepsin K (Precursor) GN=CTSK OS=Gallus gallus (Chicken) PE=2 SV=1	O	Posttranslational modification, protein turnover, chaperones	PREDICTED: cathepsin K [Leptosomus discolor]
gene20726	53	54	49	124	46	5	14	23	14	14	0.11553	0.106343	0.095163	0.214913	0.098782	0.010526	0.026008	0.04879	0.034311	0.030054	0.0214928	-1.68778	down	--	--	--	K04601|0|fab:101809280|K04601 cadherin EGF LAG seven-pass G-type receptor 2 | (RefSeq) CELSR2; cadherin EGF LAG seven-pass G-type receptor 2	--	[T]	Signal transduction mechanisms	Cadherin domain;; Domain of unknown function (DUF3497);; Laminin G domain;; 7 transmembrane receptor (Secretin family);; Laminin G domain;; EGF-like domain;; Latrophilin/CL-1-like GPS domain;; Laminin EGF-like (Domains III and V);; Cadherin prodomain like	Protocadherin-15 (Precursor) GN=Pcdh15 OS=Gallus gallus (Chicken) PE=1 SV=1	T	Signal transduction mechanisms	PREDICTED: cadherin EGF LAG seven-pass G-type receptor 2 [Ficedula albicollis]
gene2078	946	764	1204	1183	1019	388	117	386	337	516	1.10899	0.955365	1.57425	1.3756	1.60952	0.732057	0.493794	0.832437	0.581096	1.06657	0.00902102	-1.02097	down	[P]	Inorganic ion transport and metabolism	Molecular Function: sulfuric ester hydrolase activity (GO:0008484);;	K01131|0|gga:418654|K01131 steryl-sulfatase [EC:3.1.6.2] | (RefSeq) STS, steryl-sulfatase; steroid sulfatase (microsomal), isozyme S	Steroid hormone biosynthesis (ko00140)	[R]	General function prediction only	Sulfatase;; C-terminal region of aryl-sulfatase;; Type I phosphodiesterase / nucleotide pyrophosphatase	Arylsulfatase K (Precursor) GN=arsk OS=Xenopus laevis (African clawed frog) PE=2 SV=1	R	General function prediction only	PREDICTED: steryl-sulfatase isoform X18 [Gallus gallus]
gene20846	2923	7576	6255	6620	6249	755	1968	2138	1250	1898	85.3403	201.616	164.354	152.805	178.256	25.9637	49.7315	62.0774	43.0214	54.9241	0.000150262	-1.40192	down	--	--	Cellular Component: mitochondrion (GO:0005739);; Biological Process: positive regulation of apoptotic process (GO:0043065);;	--	--	--	--	G0/G1 switch protein 2	--	T	Signal transduction mechanisms	G0/G1 switch protein 2 [Lonchura striata]
gene20872	552	1139	614	1088	493	166	307	181	248	287	9.40711	20.8941	10.4026	14.6965	9.36228	4.35579	4.7629	4.20812	6.35795	5.11104	0.00820857	-1.19189	down	[R]	General function prediction only	Biological Process: cytokinesis (GO:0000910);; Molecular Function: signal transducer activity (GO:0004871);; Molecular Function: GTP binding (GO:0005525);; Cellular Component: nucleus (GO:0005634);; Cellular Component: plasma membrane (GO:0005886);; Biological Process: small GTPase mediated signal transduction (GO:0007264);; Cellular Component: cleavage furrow (GO:0032154);; Biological Process: p…	K07857|6.35419e-141|clv:102085109|K07857 Ras homolog gene family, member C | (RefSeq) RHOC; ras homolog family member C	--	[R]	General function prediction only	Ras family;; Miro-like protein;; ADP-ribosylation factor family;; Elongation factor Tu GTP binding domain	Rho-related GTP-binding protein RhoC (Precursor) GN=RHOC OS=Gallus gallus (Chicken) PE=1 SV=1	T	Signal transduction mechanisms	PREDICTED: rho-related GTP-binding protein RhoC isoform X1 [Columba livia]
gene20873	2363	3095	2928	3380	3197	601	578	738	973	613	16.9883	20.4478	18.7769	18.6323	22.214	5.05725	3.48421	5.20512	7.99091	4.23671	9.021e-09	-1.54425	down	--	--	--	K17504|0|gga:419873|K17504 protein phosphatase 1J [EC:3.1.3.16] | (RefSeq) PPM1J; protein phosphatase, Mg2+/Mn2+ dependent 1J	--	[T]	Signal transduction mechanisms	Protein phosphatase 2C;; Stage II sporulation protein E (SpoIIE)	Protein phosphatase 1H GN=ppm1h OS=Xenopus tropicalis (Western clawed frog) PE=2 SV=1	T	Signal transduction mechanisms	PREDICTED: protein phosphatase 1J [Gallus gallus]
gene21150	258	351	336	729	314	61	116	107	108	196	2.86025	3.54564	3.3505	6.40129	3.39262	0.795683	1.11408	1.21269	1.40242	2.1532	0.0347613	-1.25051	down	--	--	Cellular Component: membrane (GO:0016020);;	--	--	--	--	Uncharacterised protein family UPF0560	Protein FAM171A2 (Precursor) GN=fam171a2 OS=Xenopus laevis (African clawed frog) PE=2 SV=1	S	Function unknown	PREDICTED: protein FAM171A2 [Alligator mississippiensis]
gene21157	459	671	663	802	498	115	171	201	127	273	4.05493	5.14109	6.4616	4.99989	5.32984	1.57603	1.37628	2.18463	2.03438	3.28458	0.00779425	-1.31292	down	--	--	Molecular Function: nucleotide binding (GO:0000166);; Molecular Function: DNA binding (GO:0003677);; Molecular Function: RNA binding (GO:0003723);; Cellular Component: nucleolus (GO:0005730);; Cellular Component: cytoplasm (GO:0005737);; Biological Process: DNA repair (GO:0006281);; Biological Process: DNA recombination (GO:0006310);;	K10874|0|gga:395228|K10874 RAD52 motif-containing protein 1 | (RefSeq) RDM1, RAD52B; RAD52 motif containing 1	--	--	--	Rad52/22 family double-strand break repair protein;; RNA recognition motif. (a.k.a. RRM, RBD, or RNP domain);; RNA recognition motif. (a.k.a. RRM, RBD, or RNP domain)	RAD52 motif-containing protein 1 GN=RDM1 OS=Gallus gallus (Chicken) PE=1 SV=1	R	General function prediction only	RAD52 motif-containing protein 1 [Gallus gallus]
gene21172	448	587	456	899	306	176	169	253	114	195	2.62296	3.15042	2.41594	4.17579	1.75283	1.22152	0.853927	1.47817	0.783943	1.13523	0.0482275	-1.03987	down	--	--	Molecular Function: receptor activity (GO:0004872);; Molecular Function: integrin binding (GO:0005178);; Biological Process: cell-substrate junction assembly (GO:0007044);; Biological Process: cell-matrix adhesion (GO:0007160);; Biological Process: integrin-mediated signaling pathway (GO:0007229);; Molecular Function: zinc ion binding (GO:0008270);; Cellular Component: integrin complex (GO:000830…	K06493|0|gga:374209|K06493 integrin beta 3 | (RefSeq) ITGB3, integrin; integrin subunit beta 3	Phagosome (ko04145);; Focal adhesion (ko04510);; ECM-receptor interaction (ko04512);; Regulation of actin cytoskeleton (ko04810)	[TW]	Signal transduction mechanisms;; Extracellular structures	Integrin, beta chain;; Integrin beta cytoplasmic domain;; Integrin beta tail domain;; EGF-like domain	Integrin beta-1 (Precursor) GN=ITGB1 OS=Gallus gallus (Chicken) PE=1 SV=1	W	Extracellular structures	integrin beta-3 precursor [Gallus gallus]
gene21200	1409	1168	1595	1576	1702	285	383	225	288	544	28.6108	21.4964	29.1727	25.188	33.6934	6.76818	6.69164	5.02146	6.85358	10.92	9.19786e-07	-1.63605	down	[T]	Signal transduction mechanisms	Molecular Function: pyruvate dehydrogenase (acetyl-transferring) kinase activity (GO:0004740);; Molecular Function: ATP binding (GO:0005524);; Cellular Component: nucleus (GO:0005634);; Cellular Component: mitochondrial pyruvate dehydrogenase complex (GO:0005967);; Biological Process: regulation of gluconeogenesis (GO:0006111);; Biological Process: regulation of pH (GO:0006885);; Biological Proce…	K00898|0|phi:102105276|K00898 pyruvate dehydrogenase kinase 2/3/4 [EC:2.7.11.2] | (RefSeq) PDK2; pyruvate dehydrogenase kinase 2	--	[T]	Signal transduction mechanisms	Mitochondrial branched-chain alpha-ketoacid dehydrogenase kinase;; Histidine kinase-, DNA gyrase B-, and HSP90-like ATPase	--	T	Signal transduction mechanisms	PREDICTED: [Pyruvate dehydrogenase [lipoamide]] kinase isozyme 2, mitochondrial [Pseudopodoces humilis]
gene21237	497	1299	827	803	617	0	29	3	9	7	3.26297	7.66178	4.99139	3.71617	3.87911	0	0.161928	0.015785	0.060782	0.039295	4.31726e-20	-5.96386	down	--	--	--	K09294|2.02636e-168|fpg:101916253|K09294 homeobox protein HoxA/B/C/D9 | (RefSeq) HOXB9; homeobox B9	--	[K]	Transcription	Hox9 activation region;; Homeobox domain	Homeobox protein Hox-B9a GN=hoxb9a OS=Danio rerio (Zebrafish) PE=2 SV=2	K	Transcription	PREDICTED: homeobox protein Hox-B9 [Falco peregrinus]
gene21407	1026	1534	1822	1754	910	275	330	364	237	594	4.55748	6.04879	6.99101	6.11327	4.3894	1.41219	1.33223	1.69066	1.23118	2.55545	1.63949e-05	-1.47556	down	--	--	Biological Process: protein localization to paranode region of axon (GO:0002175);; Biological Process: cytoskeleton organization (GO:0007010);; Biological Process: cell adhesion (GO:0007155);; Cellular Component: voltage-gated potassium channel complex (GO:0008076);; Biological Process: axo-dendritic transport (GO:0008088);; Biological Process: paranodal junction assembly (GO:0030913);; Cellular …	K07379|0|gga:428309|K07379 contactin associated protein 1 | (RefSeq) CNTNAP1; contactin associated protein 1	Cell adhesion molecules (CAMs) (ko04514)	[T]	Signal transduction mechanisms	Laminin G domain;; Laminin G domain;; F5/8 type C domain;; Concanavalin A-like lectin/glucanases superfamily;; EGF-like domain;; Fibrinogen beta and gamma chains, C-terminal globular domain	Contactin-associated protein-like 5 (Precursor) GN=CNTNAP5 OS=Gallus gallus (Chicken) PE=2 SV=1	T	Signal transduction mechanisms	PREDICTED: contactin-associated protein 1, partial [Gallus gallus]
gene21611	257	1382	737	48	925	49	27	19	110	13	0.815133	3.82897	2.19795	0.126925	3.1573	0.173271	0.07103	0.059563	0.423543	0.038837	0.0200708	-3.32753	down	--	--	--	K18450|0|gga:420094|K18450 caytaxin | (RefSeq) ATCAY; ATCAY, caytaxin	--	--	--	Bcl2-/adenovirus E1B nineteen kDa-interacting protein 2;; Divergent CRAL/TRIO domain;; CRAL/TRIO domain	Protein prune homolog 2 GN=Prune2 OS=Xenopus tropicalis (Western clawed frog) PE=2 SV=1	T	Signal transduction mechanisms	PREDICTED: caytaxin isoform X3 [Gallus gallus]
gene21676	124	104	454	116	574	17	9	24	9	14	1.57021	1.15015	4.89211	1.14845	6.42869	0.217724	0.067483	0.216683	0.099608	0.166443	0.0245195	-3.7381	down	--	--	--	--	--	--	--	Perilipin family	--	R	General function prediction only	PREDICTED: collagen alpha-2(I) chain isoform X13 [Gallus gallus]
gene21806	151	223	133	182	150	35	26	41	20	61	1.31962	1.78113	1.03201	1.24306	1.26461	0.352114	0.206305	0.346859	0.204405	0.550227	0.0143596	-1.71881	down	--	--	--	--	--	--	--	Brain specific membrane anchored protein	--	S	Function unknown	PREDICTED: transmembrane protein 59-like [Meleagris gallopavo]
gene21807	606	1028	571	615	665	234	221	139	170	316	4.99473	7.159	3.59399	3.55835	5.16546	2.05262	1.75209	1.07281	1.51331	2.33318	0.0103272	-1.20304	down	--	--	--	--	--	--	--	Fibronectin type III domain;; Erythropoietin receptor, ligand binding;; Interleukin-6 receptor alpha chain, binding	Prolactin receptor (Precursor) GN=PRLR OS=Columba livia (Domestic pigeon) PE=2 SV=1	W	Extracellular structures	PREDICTED: cytokine receptor-like factor 1 isoform X4 [Gallus gallus]
gene21821	764	287	735	708	1356	51	32	61	66	153	4.58847	1.56924	4.23987	3.36157	7.89409	0.319881	0.146618	0.355425	0.403433	0.9098	0.00121048	-2.95622	down	--	--	Molecular Function: 3',5'-cyclic-nucleotide phosphodiesterase activity (GO:0004114);; Biological Process: signal transduction (GO:0007165);; Biological Process: metabolic process (GO:0008152);; Molecular Function: metal ion binding (GO:0046872);;	K13293|0|fch:102052170|K13293 cAMP-specific phosphodiesterase 4 [EC:3.1.4.53] | (RefSeq) PDE4C; phosphodiesterase 4C	Purine metabolism (ko00230)	[T]	Signal transduction mechanisms	3'5'-cyclic nucleotide phosphodiesterase	Dual 3&apos;,5&apos;-cyclic-AMP and -GMP phosphodiesterase 11A GN=pde11a OS=Takifugu rubripes (Japanese pufferfish) PE=3 SV=1	T	Signal transduction mechanisms	PREDICTED: cAMP-specific 3&apos;,5&apos;-cyclic phosphodiesterase 4C isoform X3 [Meleagris gallopavo]
gene21838	1003	1344	851	753	401	243	144	238	111	340	3.12588	3.25915	2.51778	1.80178	1.18253	0.788226	0.331868	0.74055	0.404497	0.955361	0.00886819	-1.52804	down	--	--	--	--	--	[O]	Posttranslational modification, protein turnover, chaperones	A-macroglobulin complement component;; Alpha-2-macroglobulin family N-terminal region;; Alpha-2-macroglobulin family;; A-macroglobulin receptor;; Farnesoic acid 0-methyl transferase;; Alpha-macro-globulin thiol-ester bond-forming region;; MG2 domain;; Prenyltransferase-like;; Kazal-type serine protease inhibitor domain	Ovostatin (Precursor) OS=Gallus gallus (Chicken) PE=1 SV=3	O	Posttranslational modification, protein turnover, chaperones	PREDICTED: C3 and PZP-like alpha-2-macroglobulin domain-containing protein 8 [Phaethon lepturus]
gene21839	129	160	62	99	68	28	22	9	5	21	0.370951	0.419197	0.158791	0.225187	0.189736	0.0933	0.053608	0.025222	0.016902	0.059062	0.00265968	-2.12573	down	--	--	--	K04236|0|gga:420139|K04236 coagulation factor II (thrombin) receptor-like 3 | (RefSeq) F2RL3; F2R like thrombin/trypsin receptor 3	Neuroactive ligand-receptor interaction (ko04080)	--	--	7 transmembrane receptor (rhodopsin family);; Serpentine type 7TM GPCR chemoreceptor Srsx	Proteinase-activated receptor 1 (Precursor) GN=f2r OS=Xenopus laevis (African clawed frog) PE=1 SV=1	T	Signal transduction mechanisms	PREDICTED: proteinase-activated receptor 4 [Gallus gallus]
gene21920	632	1111	270	2135	1977	77	168	85	157	323	12.5925	19.6958	4.7416	32.8858	38.3634	1.78744	2.93439	1.80252	3.65041	6.36815	0.0275957	-2.45615	down	--	--	Molecular Function: actin binding (GO:0003779);; Molecular Function: calmodulin binding (GO:0005516);; Biological Process: actomyosin structure organization (GO:0031032);;	--	--	[Z]	Cytoskeleton	Calponin family repeat;; Calponin homology (CH) domain	Calponin-1 GN=CNN1 OS=Gallus gallus (Chicken) PE=1 SV=2	Z	Cytoskeleton	RecName: Full=Calponin-1; AltName: Full=Calponin, smooth muscle [Gallus gallus]
gene21995	1560	1548	1897	3018	2412	405	338	542	480	820	29.184	26.5138	32.0374	44.9167	44.4008	9.08588	5.63963	10.3529	11.0528	15.6562	3.07495e-06	-1.50484	down	[I]	Lipid transport and metabolism	Molecular Function: catalytic activity (GO:0003824);; Molecular Function: receptor binding (GO:0005102);; Cellular Component: mitochondrion (GO:0005739);; Biological Process: metabolic process (GO:0008152);;	K12663|1.71269e-159|cmy:102929410|K12663 Delta(3,5)-Delta(2,4)-dienoyl-CoA isomerase [EC:5.3.3.-] | (RefSeq) ECH1; enoyl-CoA hydratase 1	Peroxisome (ko04146)	[I]	Lipid transport and metabolism	Enoyl-CoA hydratase/isomerase family	Enoyl-CoA hydratase domain-containing protein 3, mitochondrial (Precursor) GN=echdc3 OS=Danio rerio (Zebrafish) PE=2 SV=2	I	Lipid transport and metabolism	PREDICTED: delta(3,5)-Delta(2,4)-dienoyl-CoA isomerase, mitochondrial [Chelonia mydas]
gene22036	60	69	56	76	43	0	0	0	13	30	0.583783	0.616996	0.489034	0.586994	0.410078	0	0	0	0.14628	0.285398	0.000896668	-2.37521	down	--	--	Cellular Component: plasma membrane (GO:0005886);; Cellular Component: vesicle membrane (GO:0012506);; Cellular Component: cytoplasmic vesicle (GO:0031410);; Biological Process: single-organism process (GO:0044699);;	--	--	--	--	Domain of unknown function (DUF4203)	Transmembrane protein 198 GN=tmem198 OS=Xenopus tropicalis (Western clawed frog) PE=1 SV=1	S	Function unknown	PREDICTED: transmembrane protein 198-like [Meleagris gallopavo]
gene22083	416	369	667	908	361	0	0	0	0	0	2.79215	2.23211	4.36998	3.91536	2.28516	0	0	0	0	0	4.52941e-35	#NAME?	down	[K]	Transcription	--	K09296|0|gga:430698|K09296 homeobox protein HoxA/C/D11 | (RefSeq) HOXC11; homeobox C11	--	[K]	Transcription	Protein of unknown function (DUF3528);; Homeobox domain	Homeobox protein Hox-C11a OS=Danio rerio (Zebrafish) PE=2 SV=1	K	Transcription	PREDICTED: homeobox protein Hox-C11a [Gallus gallus]
gene22084	5771	5372	6386	6142	5670	0	0	0	5	0	71.835	60.855	71.4789	60.355	68.8512	0	0	0	0.059415	0	7.86569e-163	-11.7718	down	[K]	Transcription	--	K17444|0|gga:770471|K17444 homrobox protein Hox-C10 | (RefSeq) HOXC10, RP11-834C11.12; homeobox C10	--	[K]	Transcription	Homeobox domain	Homeobox protein Hox-D10 GN=HOXD10 OS=Heterodontus francisci (Horn shark) PE=3 SV=1	K	Transcription	PREDICTED: LOW QUALITY PROTEIN: homeobox protein Hox-C10 [Gallus gallus]
gene22087	259	144	300	209	252	11	34	8	7	32	6.47474	3.33033	6.84238	4.07993	6.16002	0.303448	0.693411	0.175006	0.176008	0.769562	2.31961e-07	-3.25872	down	--	--	Molecular Function: transcription factor activity, sequence-specific DNA binding (GO:0003700);; Cellular Component: nucleus (GO:0005634);; Biological Process: transcription, DNA-templated (GO:0006351);; Molecular Function: sequence-specific DNA binding (GO:0043565);;	K09294|0|gga:425723|K09294 homeobox protein HoxA/B/C/D9 | (RefSeq) HOXC9; homeobox C9	--	[K]	Transcription	Hox9 activation region;; Homeobox domain	Homeobox protein Hox-C9a GN=hoxc9a OS=Danio rerio (Zebrafish) PE=2 SV=2	K	Transcription	homeobox protein HoxC9 [Gallus gallus]
gene22097	335	257	307	384	389	21	11	34	21	92	3.53739	2.25465	2.66485	2.92957	3.8882	0.232893	0.085001	0.324521	0.228	0.878845	1.13979e-06	-2.78929	down	--	--	--	--	--	--	--	Zinc-finger of C2H2 type;; Zinc-finger double-stranded RNA-binding	Zinc finger protein 385B GN=znf385b OS=Danio rerio (Zebrafish) PE=2 SV=1	R	General function prediction only	PREDICTED: uncharacterized protein LOC102112144 [Pseudopodoces humilis]
gene22328	87	49	52	64	85	13	6	6	15	27	0.727585	0.374085	0.394598	0.422118	0.686279	0.121998	0.039284	0.042934	0.14234	0.222766	0.0122576	-1.85074	down	--	--	--	K05421|1.65473e-140|gga:100858060|K05421 B-cell stimulating factor 3 | (RefSeq) CLCF1; cardiotrophin-like cytokine factor 1	Cytokine-cytokine receptor interaction (ko04060)	--	--	Plethodontid receptivity factor PRF;; Ciliary neurotrophic factor	--	T	Signal transduction mechanisms	PREDICTED: LOW QUALITY PROTEIN: cardiotrophin-like cytokine factor 1-like [Gallus gallus]
gene2234	107	109	99	155	103	17	18	18	38	35	1.38507	1.29561	1.15607	1.6762	0.800672	0.23419	0.11862	0.137317	0.558572	0.416501	0.0210352	-1.64639	down	--	--	--	--	--	--	--	FAM70 protein	Transmembrane protein 255A GN=tmem255a OS=Xenopus laevis (African clawed frog) PE=2 SV=1	S	Function unknown	PREDICTED: transmembrane protein 255B [Pseudopodoces humilis]
gene2239	10036	7872	11519	8753	15770	46	167	49	36	164	79.5474	56.64	80.3017	89.5971	112.699	0.082308	0.29289	0.086281	0.074005	1.65936	7.29514e-26	-6.47984	down	--	--	Molecular Function: magnesium ion binding (GO:0000287);; Molecular Function: ADP-ribosylarginine hydrolase activity (GO:0003875);; Biological Process: protein de-ADP-ribosylation (GO:0051725);;	--	--	--	--	ADP-ribosylglycohydrolase	[Protein ADP-ribosylarginine] hydrolase-like protein 1 GN=adprhl1 OS=Xenopus laevis (African clawed frog) PE=2 SV=1	R	General function prediction only	PREDICTED: ADP-ribosylhydrolase like 1 isoform X3 [Gallus gallus]
gene22541	473703	480160	415610	771725	483611	4366	5719	3440	5494	7406	6574.37	5995.17	4914.1	8439.29	6414.92	79.1701	78.2958	53.6379	94.8394	111.519	1.37797e-64	-6.12331	down	--	--	Cellular Component: stress fiber (GO:0001725);; Cellular Component: podosome (GO:0002102);; Molecular Function: actin binding (GO:0003779);; Biological Process: response to oxidative stress (GO:0006979);; Cellular Component: cortical cytoskeleton (GO:0030863);; Cellular Component: filamentous actin (GO:0031941);; Biological Process: regulation of ATPase activity (GO:0043462);;	K10374|1.12393e-111|phi:102102888|K10374 tropomyosin 2 | (RefSeq) TPM2; tropomyosin 2 (beta)	Cardiac muscle contraction (ko04260);; Adrenergic signaling in cardiomyocytes (ko04261)	[Z]	Cytoskeleton	Tropomyosin;; Tropomyosin like;; Laminin Domain II	Tropomyosin beta chain GN=TPM2 OS=Gallus gallus (Chicken) PE=1 SV=1	Z	Cytoskeleton	PREDICTED: tropomyosin alpha-4 chain-like isoform X12 [Ficedula albicollis]
gene22565	4314	3787	4191	4757	3042	1303	1126	1165	946	1789	32.5195	26.0676	28.3791	27.8971	22.3493	11.3436	7.23336	8.61585	8.25629	13.1398	5.7869e-05	-1.16377	down	--	--	--	--	--	--	--	C1q domain;; Collagen triple helix repeat (20 copies)	Caprin-2 GN=si:ch211-11c20.4 OS=Danio rerio (Zebrafish) PE=1 SV=1	W	Extracellular structures	PREDICTED: complement C1q tumor necrosis factor-related protein 3 isoformX2 [Gallus gallus]
gene22606	1186	889	534	729	464	23	19	22	26	35	3.34421	2.13122	1.66636	1.59124	1.19161	0.06928	0.041841	0.057337	0.07889	0.089981	4.67203e-10	-4.42906	down	--	--	Biological Process: lipid metabolic process (GO:0006629);; Molecular Function: phosphoric diester hydrolase activity (GO:0008081);;	--	--	[T]	Signal transduction mechanisms	Phosphatidylinositol-specific phospholipase C, X domain	PI-PLC X domain-containing protein 3 GN=plcxd3 OS=Danio rerio (Zebrafish) PE=2 SV=1	T	Signal transduction mechanisms	PREDICTED: PI-PLC X domain-containing protein 3 [Gallus gallus]
gene2298	863	483	1420	1267	635	71	158	71	86	143	13.2542	6.66282	19.3239	15.939	10.2182	0.864641	1.39025	1.09875	1.81346	2.69834	6.97081e-07	-2.64866	down	[R]	General function prediction only	--	--	--	[R]	General function prediction only	Alpha/beta hydrolase family;; Alpha/beta hydrolase family	--	S	Function unknown	testis-expressed sequence 30 protein [Gallus gallus]
gene2299	26021	25578	26981	59279	27838	414	517	320	172	627	209.284	185.728	194.135	375.855	218.562	4.00861	3.7455	2.5994	1.63873	5.1436	2.52128e-23	-5.84686	down	--	--	Molecular Function: protein-lysine N-methyltransferase activity (GO:0016279);; Biological Process: peptidyl-lysine methylation (GO:0018022);;	--	--	[A]	RNA processing and modification	Putative methyltransferase;; Putative methyltransferase	Protein-lysine methyltransferase METTL21B GN=mettl21b OS=Xenopus tropicalis (Western clawed frog) PE=2 SV=1	A	RNA processing and modification	PREDICTED: protein-lysine methyltransferase METTL21C [Gallus gallus]
gene23188	3659	4068	4048	4625	3887	1223	1441	1292	929	1542	19.8481	20.2852	19.8363	19.6441	20.6983	7.84463	6.35347	6.71476	5.78902	8.29257	6.5864e-05	-1.16158	down	--	--	--	K04281|0|gga:427121|K04281 calpastatin | (RefSeq) CAST; calpastatin	--	--	--	Calpain inhibitor	--	R	General function prediction only	calpastatin [Gallus gallus]
gene23254	2159	1639	2414	2992	1274	422	464	632	498	843	4.64167	3.57144	4.21534	4.87067	2.88368	0.83411	0.652037	1.4073	1.09577	2.05935	8.5616e-06	-1.36135	down	--	--	Molecular Function: calcium ion binding (GO:0005509);; Molecular Function: hyaluronic acid binding (GO:0005540);; Cellular Component: proteinaceous extracellular matrix (GO:0005578);; Biological Process: cell adhesion (GO:0007155);; Molecular Function: carbohydrate binding (GO:0030246);;	K06793|0|gga:395565|K06793 versican core protein | (RefSeq) VCAN, PG-M; versican	Cell adhesion molecules (CAMs) (ko04514)	--	--	Extracellular link domain;; Lectin C-type domain;; Immunoglobulin V-set domain;; EGF-like domain;; Sushi domain (SCR repeat)	Versican core protein (Precursor) GN=VCAN OS=Gallus gallus (Chicken) PE=2 SV=1	T	Signal transduction mechanisms	versican core protein precursor [Gallus gallus]
gene23329	1150	1177	983	1088	431	217	226	318	185	614	5.54559	5.21331	4.19919	4.12943	2.05756	1.23963	0.951829	1.51947	1.28612	3.11806	0.0183542	-1.16527	down	--	--	Biological Process: activation of MAPK activity (GO:0000187);; Biological Process: G-protein coupled receptor signaling pathway (GO:0007186);; Cellular Component: cell surface (GO:0009986);; Cellular Component: integral component of membrane (GO:0016021);; Cellular Component: endocytic vesicle (GO:0030139);; Molecular Function: PDZ domain binding (GO:0030165);; Biological Process: bleb assembly (…	K04289|0|gga:427339|K04289 lysophosphatidic acid receptor 1 | (RefSeq) LPAR1, EDG2; lysophosphatidic acid receptor 1	Neuroactive ligand-receptor interaction (ko04080);; Gap junction (ko04540)	[R]	General function prediction only	7 transmembrane receptor (rhodopsin family)	Lysophosphatidic acid receptor 1-A GN=lpar1-a OS=Xenopus laevis (African clawed frog) PE=2 SV=1	T	Signal transduction mechanisms	PREDICTED: lysophosphatidic acid receptor 1 isoform X1 [Calypte anna]
gene23405	5428	4742	7145	9769	6750	448	1029	806	575	679	45.8003	36.4813	55.0035	65.5884	56.1451	4.4887	7.51501	6.81431	5.71943	5.67706	1.16281e-21	-2.75716	down	--	--	Molecular Function: tropomyosin binding (GO:0005523);; Biological Process: muscle contraction (GO:0006936);; Cellular Component: COP9 signalosome (GO:0008180);; Biological Process: adult locomotory behavior (GO:0008344);; Cellular Component: membrane (GO:0016020);; Cellular Component: myofibril (GO:0030016);; Biological Process: myofibril assembly (GO:0030239);; Cellular Component: cortical cytos…	K10370|0|gga:395883|K10370 tropomodulin | (RefSeq) TMOD1, E-Tmod, tropomodulin-1; tropomodulin 1	--	[Z]	Cytoskeleton	Tropomodulin	--	Z	Cytoskeleton	tropomodulin-1 [Gallus gallus]
gene23865	387	827	451	825	298	125	163	167	189	280	3.61391	8.61291	4.31469	7.36255	3.25523	1.4605	1.33895	2.00738	1.99731	2.97977	0.0462373	-1.07212	down	--	--	Cellular Component: integral component of membrane (GO:0016021);; Molecular Function: lysophosphatidic acid receptor activity (GO:0070915);;	K04291|0|gga:426086|K04291 lysophosphatidic acid receptor 2 | (RefSeq) LPAR2, EDG4; lysophosphatidic acid receptor 2	Neuroactive ligand-receptor interaction (ko04080)	[R]	General function prediction only	7 transmembrane receptor (rhodopsin family)	Lysophosphatidic acid receptor 1-A GN=lpar1-a OS=Xenopus laevis (African clawed frog) PE=2 SV=1	T	Signal transduction mechanisms	PREDICTED: lysophosphatidic acid receptor 2 [Meleagris gallopavo]
gene23948	1348	1073	1675	2285	1878	518	276	492	455	1063	12.9767	12.0985	13.8837	16.7959	10.356	3.27787	2.77929	2.59796	4.49666	5.47126	0.00592598	-1.06037	down	--	--	Biological Process: RNA metabolic process (GO:0016070);;	K16865|1.22416e-179|acs:100558313|K16865 programmed cell death protein 4 | (RefSeq) programmed cell death protein 4	--	[T]	Signal transduction mechanisms	MA3 domain	Programmed cell death protein 4 GN=PDCD4 OS=Gallus gallus (Chicken) PE=2 SV=1	T	Signal transduction mechanisms	PREDICTED: programmed cell death protein 4-like [Haliaeetus leucocephalus]
gene23988	563	566	501	1072	819	39	17	88	44	76	6.69832	5.89909	5.21385	9.48246	8.95819	0.506996	0.156047	0.959626	0.580954	0.854081	4.64827e-13	-3.22051	down	--	--	--	--	--	[R]	General function prediction only	Tetratricopeptide repeat;; Tetratricopeptide repeat;; TPR repeat;; Tetratricopeptide repeat;; Tetratricopeptide repeat;; Soluble NSF attachment protein, SNAP;; Tetratricopeptide repeat	--	R	General function prediction only	PREDICTED: tetratricopeptide repeat protein 24-like isoform X1 [Meleagris gallopavo]
gene24026	43127	40759	32549	47975	14985	9172	7175	9659	6686	18634	190.992	164.661	129.786	171.155	64.8347	47.8778	27.5095	42.5538	34.9939	81.5563	0.00592921	-1.31547	down	--	--	Molecular Function: extracellular matrix structural constituent (GO:0005201);; Cellular Component: collagen trimer (GO:0005581);; Molecular Function: metal ion binding (GO:0046872);;	K06236|5.00405e-165|fch:102046312|K06236 collagen, type I, alpha | (RefSeq) COL1A1; collagen type I alpha 1 chain	Focal adhesion (ko04510);; ECM-receptor interaction (ko04512);; AGE-RAGE signaling pathway in diabetic complications (ko04933)	[W]	Extracellular structures	Collagen triple helix repeat (20 copies);; Fibrillar collagen C-terminal domain;; von Willebrand factor type C domain	Collagen alpha-1(I) chain (Precursor) GN=COL1A1 OS=Gallus gallus (Chicken) PE=1 SV=3	W	Extracellular structures	collagen, partial [Gallus gallus]
gene24189	281	327	390	616	270	38	57	45	111	105	8.03306	9.04256	11.2025	15.0847	8.21144	1.12346	1.31925	1.42341	3.9202	2.78008	0.000641309	-1.85271	down	--	--	Cellular Component: photoreceptor outer segment (GO:0001750);; Molecular Function: G-protein coupled receptor activity (GO:0004930);; Biological Process: G-protein coupled receptor signaling pathway (GO:0007186);; Biological Process: visual perception (GO:0007601);; Biological Process: phototransduction (GO:0007602);; Molecular Function: photoreceptor activity (GO:0009881);; Cellular Component: i…	K04251|1.41558e-62|gga:396421|K04251 long/medium wavelength-sensitive opsin | (RefSeq) OPN1LW; opsin 1 (cone pigments), long-wave-sensitive (color blindness, protan)	--	[R]	General function prediction only	7 transmembrane receptor (rhodopsin family)	Red-sensitive opsin OS=Gallus gallus (Chicken) PE=1 SV=1	T	Signal transduction mechanisms	long wavelength-sensitive opsin [Uta stansburiana]
gene24642	44	99	103	125	67	20	16	5	0	41	2.61335	5.66899	5.72965	4.30119	3.70351	1.18935	0.851538	0.222551	0	2.3312	0.00846636	-1.9732	down	--	--	--	K10803|1.11093e-12|xtr:100380033|K10803 DNA-repair protein XRCC1 | (RefSeq) xrcc1, rcc; X-ray repair complementing defective repair in Chinese hamster cells 1	Base excision repair (ko03410)	[L]	Replication, recombination and repair	XRCC1 N terminal domain	--	L	Replication, recombination and repair	PREDICTED: DNA repair protein XRCC1 [Xenopus (Silurana) tropicalis]
gene24733	895	1120	1021	1332	1202	140	192	185	246	430	8.85899	10.469	7.81671	9.65877	11.2047	1.35904	1.40067	1.54701	2.8183	3.97556	2.52884e-06	-1.73946	down	--	--	--	--	--	--	--	Cell division protein anillin;; Hr1 repeat;; PH domain	Rhotekin-2 GN=rtkn2 OS=Xenopus laevis (African clawed frog) PE=2 SV=1	T	Signal transduction mechanisms	PREDICTED: rhotekin-like [Anolis carolinensis]
gene24885	1214	2341	1669	2410	2090	305	448	496	398	596	16.4956	29.4347	19.8578	27.3452	27.657	4.99235	5.12234	6.52496	6.19239	7.86397	1.07872e-07	-1.61754	down	[T]	Signal transduction mechanisms	Molecular Function: pyruvate dehydrogenase (acetyl-transferring) kinase activity (GO:0004740);; Molecular Function: ATP binding (GO:0005524);; Cellular Component: nucleus (GO:0005634);; Cellular Component: mitochondrial pyruvate dehydrogenase complex (GO:0005967);; Biological Process: regulation of gluconeogenesis (GO:0006111);; Biological Process: regulation of pH (GO:0006885);; Biological Proce…	K00898|0|fpg:101915736|K00898 pyruvate dehydrogenase kinase 2/3/4 [EC:2.7.11.2] | (RefSeq) PDK2; pyruvate dehydrogenase kinase 2	--	[T]	Signal transduction mechanisms	Mitochondrial branched-chain alpha-ketoacid dehydrogenase kinase;; Histidine kinase-, DNA gyrase B-, and HSP90-like ATPase	--	T	Signal transduction mechanisms	PREDICTED: pyruvate dehydrogenase kinase, isozyme 2 [Cuculus canorus]
gene2537	742	671	700	1369	1092	206	306	217	208	313	5.08918	4.15428	4.31433	7.23083	7.21943	1.62962	1.84057	1.49088	1.6738	2.0897	0.000780441	-1.37421	down	--	--	Biological Process: arginine metabolic process (GO:0006525);; Biological Process: transport (GO:0006810);; Cellular Component: integral component of membrane (GO:0016021);;	K15101|1.10801e-171|gga:418886|K15101 solute carrier family 25 (mitochondrial ornithine transporter) member 2/15 | (RefSeq) SLC25A15; solute carrier family 25 member 15	--	[C]	Energy production and conversion	Mitochondrial carrier protein	Solute carrier family 25 member 48 GN=slc25a48 OS=Danio rerio (Zebrafish) PE=2 SV=1	C	Energy production and conversion	mitochondrial ornithine transporter 1 [Gallus gallus]
gene26239	625	655	425	1165	488	210	194	271	0	0	10.654	10.7939	7.02264	16.2422	7.69385	4.47341	2.82194	4.3375	0	0	0.00346341	-1.7715	down	--	--	Molecular Function: transcription corepressor activity (GO:0003714);; Molecular Function: metallocarboxypeptidase activity (GO:0004181);; Cellular Component: extracellular space (GO:0005615);; Biological Process: regulation of transcription, DNA-templated (GO:0006355);; Biological Process: proteolysis (GO:0006508);; Biological Process: cell adhesion (GO:0007155);; Molecular Function: zinc ion bin…	--	--	[R]	General function prediction only	Zinc carboxypeptidase;; F5/8 type C domain	Carboxypeptidase D (Fragment) GN=CPD OS=Lophonetta specularioides (Crested duck) PE=1 SV=1	R	General function prediction only	PREDICTED: adipocyte enhancer-binding protein 1, partial [Meleagris gallopavo]
gene26513	243	247	397	399	203	28	44	70	62	148	3.47414	3.22302	5.12447	4.5275	2.83355	0.463532	0.539572	0.991369	1.04316	2.09271	0.0109086	-1.5993	down	--	--	--	K09677|1.01368e-88|pss:102460118|K09677 galactose-3-O-sulfotransferase 4 [EC:2.8.2.-] | (RefSeq) GAL3ST4; galactose-3-O-sulfotransferase 4	--	--	--	Galactose-3-O-sulfotransferase	--	R	General function prediction only	PREDICTED: LOW QUALITY PROTEIN: galactose-3-O-sulfotransferase 4, partial [Meleagris gallopavo]
gene2667	386	516	531	339	582	156	149	172	57	168	0.971135	1.18127	1.19881	0.669882	1.39257	0.457471	0.314336	0.412453	0.162315	0.402428	0.0225751	-1.2747	down	--	--	Molecular Function: metal ion binding (GO:0046872);;	K18668|0|gga:418963|K18668 ribonuclease ZC3H12 [EC:3.1.-.-] | (RefSeq) ZC3H12C; zinc finger CCCH-type containing 12C	--	[S]	Function unknown	Zc3h12a-like Ribonuclease NYN domain	NEDD4-binding protein 1 GN=n4bp1 OS=Xenopus laevis (African clawed frog) PE=2 SV=1	S	Function unknown	PREDICTED: probable ribonuclease ZC3H12C isoform X6 [Gallus gallus]
gene2671	2029	4009	2392	2782	1762	603	568	717	492	1263	7.47398	13.4797	8.12311	8.56	6.5112	2.49693	1.87818	2.76414	2.15924	4.74033	0.00183775	-1.34822	down	--	--	--	--	--	[R]	General function prediction only	Glycosyl transferase family 90;; Filamin/ABP280 repeat	KDEL motif-containing protein 1 (Precursor) GN=kdelc1 OS=Danio rerio (Zebrafish) PE=2 SV=1	R	General function prediction only	PREDICTED: KDEL motif-containing protein 2 [Ficedula albicollis]
gene2732	1866	1643	1916	1645	1812	748	670	558	385	805	7.17035	5.75279	6.6261	4.99692	6.80451	3.38634	2.22647	2.13221	1.7428	3.06642	0.00313388	-1.00069	down	--	--	--	K15049|0|gga:428090|K15049 endonuclease domain-containing 1 protein | (RefSeq) ENDOD1; endonuclease domain containing 1	--	--	--	DNA/RNA non-specific endonuclease	--	R	General function prediction only	PREDICTED: endonuclease domain-containing 1 protein [Gallus gallus]
gene2741	115	223	327	191	206	36	66	43	41	85	0.630903	1.09659	1.5814	0.830598	1.17095	0.23251	0.323305	0.228629	0.268774	0.440557	0.0323396	-1.49451	down	--	--	--	K03443|0|mgp:100548127|K03443 pannexin 1 | (RefSeq) PANX1; pannexin 1	--	--	--	Innexin	--	P	Inorganic ion transport and metabolism	PREDICTED: pannexin-1 [Ficedula albicollis]
gene2823	1827	2364	2396	1782	2155	557	468	782	493	427	10.2929	13.1899	11.3287	7.62144	10.7866	3.43324	2.28929	4.07055	2.69001	1.67546	1.13979e-06	-1.42219	down	[RTKL]	General function prediction only;; Signal transduction mechanisms;; Transcription;; Replication, recombination and repair	Cellular Component: ruffle (GO:0001726);; Molecular Function: protein serine/threonine kinase activity (GO:0004674);; Molecular Function: collagen binding (GO:0005518);; Molecular Function: ATP binding (GO:0005524);; Cellular Component: nucleus (GO:0005634);; Cellular Component: Golgi apparatus (GO:0005794);; Cellular Component: cell-cell junction (GO:0005911);; Biological Process: neuromuscular …	K04409|0|gga:419083|K04409 p21-activated kinase 1 [EC:2.7.11.1] | (RefSeq) PAK1; p21 (RAC1) activated kinase 1	MAPK signaling pathway (ko04010);; ErbB signaling pathway (ko04012);; Focal adhesion (ko04510);; Regulation of actin cytoskeleton (ko04810)	[T]	Signal transduction mechanisms	Protein kinase domain;; Protein tyrosine kinase;; P21-Rho-binding domain;; Kinase-like	Serine/threonine-protein kinase PAK 3 GN=pak3 OS=Xenopus laevis (African clawed frog) PE=2 SV=1	T	Signal transduction mechanisms	serine/threonine-protein kinase PAK 1 [Gallus gallus]
gene2885	556	2904	1062	2715	1901	207	505	391	500	264	18.8646	89.993	32.4335	72.9644	63.169	8.25254	14.834	13.2737	19.9898	8.86127	0.0271034	-1.7457	down	--	--	Molecular Function: oxygen transporter activity (GO:0005344);; Molecular Function: iron ion binding (GO:0005506);; Cellular Component: hemoglobin complex (GO:0005833);; Biological Process: oxygen transport (GO:0015671);; Molecular Function: oxygen binding (GO:0019825);; Molecular Function: heme binding (GO:0020037);; Molecular Function: hemoglobin binding (GO:0030492);;	--	--	[C]	Energy production and conversion	Globin	Hemoglobin subunit beta GN=HBB OS=Gallus gallus (Chicken) PE=1 SV=2	C	Energy production and conversion	hemoglobin subunit beta [Gallus gallus]
gene2920	563	532	591	643	415	97	124	175	89	295	2.81849	2.30198	2.49275	2.71063	1.93904	0.518438	0.547193	0.797227	0.45833	1.40811	0.0105042	-1.35435	down	[C]	Energy production and conversion	Molecular Function: protein binding (GO:0005515);; Biological Process: glycerol metabolic process (GO:0006071);; Biological Process: lipid metabolic process (GO:0006629);; Molecular Function: glycerophosphodiester phosphodiesterase activity (GO:0008889);; Cellular Component: endomembrane system (GO:0012505);; Cellular Component: integral component of membrane (GO:0016021);; Biological Process: sp…	--	--	[C]	Energy production and conversion	Glycerophosphoryl diester phosphodiesterase family	Glycerophosphodiester phosphodiesterase domain-containing protein 5 GN=GDPD5 OS=Gallus gallus (Chicken) PE=1 SV=1	C	Energy production and conversion	glycerophosphodiester phosphodiesterase domain-containing protein 5 [Gallus gallus]
gene3070	263	150	163	231	46	5	16	0	0	6	3.57471	2.04772	2.3925	3.01105	0.573693	0.099883	0.232176	0	0	0.087729	6.41117e-07	-4.57683	down	--	--	Biological Process: negative regulation of transcription from RNA polymerase II promoter (GO:0000122);; Biological Process: positive regulation of cell-matrix adhesion (GO:0001954);; Molecular Function: low-density lipoprotein receptor activity (GO:0005041);; Cellular Component: Golgi apparatus (GO:0005794);; Biological Process: phagocytosis, recognition (GO:0006910);; Biological Process: cell su…	K06259|0|gga:417730|K06259 CD36 antigen | (RefSeq) CD36; CD36 molecule	PPAR signaling pathway (ko03320);; Phagosome (ko04145);; ECM-receptor interaction (ko04512);; Adipocytokine signaling pathway (ko04920)	[T]	Signal transduction mechanisms	CD36 family	--	T	Signal transduction mechanisms	platelet glycoprotein 4 [Gallus gallus]
gene312	2201	1044	1104	3506	8051	20	81	6	60	75	20.9286	9.11527	9.42602	25.9107	72.2695	0.203008	0.645724	0.040594	0.620109	0.687868	0.00871247	-5.61267	down	--	--	Molecular Function: actin binding (GO:0003779);; Molecular Function: tropomyosin binding (GO:0005523);; Cellular Component: cytoskeleton (GO:0005856);;	--	--	[Z]	Cytoskeleton	Tropomodulin	--	Z	Cytoskeleton	leiomodin-2 [Gallus gallus]
gene3182	206	382	789	951	1372	0	11	1	31	0	3.90148	6.61076	13.4779	14.2734	25.4607	0	0.17778	0.012332	0.686453	0	3.72724e-06	-5.77812	down	[C]	Energy production and conversion	Molecular Function: L-lactate dehydrogenase activity (GO:0004459);; Molecular Function: structural constituent of eye lens (GO:0005212);; Cellular Component: cytosol (GO:0005829);; Biological Process: pyruvate metabolic process (GO:0006090);; Biological Process: glycolytic process (GO:0006096);; Biological Process: cellular carbohydrate metabolic process (GO:0044262);; Biological Process: oxidati…	K00016|3.96143e-158|gga:373997|K00016 L-lactate dehydrogenase [EC:1.1.1.27] | (RefSeq) LDHB; lactate dehydrogenase B	Glycolysis / Gluconeogenesis (ko00010);; Cysteine and methionine metabolism (ko00270);; Pyruvate metabolism (ko00620);; Propanoate metabolism (ko00640)	[C]	Energy production and conversion	lactate/malate dehydrogenase, NAD binding domain;; lactate/malate dehydrogenase, alpha/beta C-terminal domain;; Family 4 glycosyl hydrolase	L-lactate dehydrogenase B chain GN=LDHB OS=Gallus gallus (Chicken) PE=1 SV=3	C	Energy production and conversion	L-lactate dehydrogenase B chain [Gallus gallus]
gene326	691	1082	659	642	680	165	129	202	171	241	2.46348	3.4587	3.76136	1.8254	2.31352	0.642879	0.368715	0.674355	0.671345	0.812025	0.000322832	-1.54362	down	--	--	--	--	--	--	--	GDSL/SGNH-like Acyl-Esterase family found in Pmr5 and Cas1p;; Cadherin-like beta sandwich domain	--	S	Function unknown	PREDICTED: cadherin-like and PC-esterase domain containing 1 isoform X5 [Gallus gallus]
gene3372	1911	1086	624	2845	1411	129	214	156	148	278	10.2306	5.05027	2.84747	12.2151	6.7921	1.02588	0.878089	0.731904	1.23393	1.2973	0.000458705	-2.60525	down	[T]	Signal transduction mechanisms	Molecular Function: ion channel activity (GO:0005216);; Biological Process: ion transport (GO:0006811);; Cellular Component: membrane (GO:0016020);;	K04905|0|fch:102057188|K04905 potassium voltage-gated channel Eag-related subfamily H member 2 | (RefSeq) KCNH2; potassium voltage-gated channel subfamily H member 2	--	[PT]	Inorganic ion transport and metabolism;; Signal transduction mechanisms	Ion transport protein;; PAS domain;; Cyclic nucleotide-binding domain;; Ion channel;; PAS fold;; PAS fold	Potassium voltage-gated channel subfamily H member 2 (Fragment) GN=KCNH2 OS=Gallus gallus (Chicken) PE=2 SV=1	P	Inorganic ion transport and metabolism	PREDICTED: potassium voltage-gated channel subfamily H member 2 [Falco cherrug]
gene3533	859	883	1268	1395	878	0	0	6	3	0	29.606	27.7384	39.3362	38.0142	29.5708	0	0	0.174992	0.082952	0	1.48846e-58	-8.58958	down	--	--	Molecular Function: transcription regulatory region sequence-specific DNA binding (GO:0000976);; Molecular Function: transcription factor activity, sequence-specific DNA binding (GO:0003700);; Cellular Component: nucleus (GO:0005634);; Biological Process: axon guidance (GO:0007411);; Cellular Component: lamellipodium (GO:0030027);; Cellular Component: filopodium (GO:0030175);; Cellular Component:…	K09319|1.99041e-37|gga:100859435|K09319 homeobox protein engrailed | (RefSeq) EN2, En-2, Gg-En-2; engrailed homeobox 2	--	[R]	General function prediction only	--	Homeobox protein engrailed-2 GN=EN2 OS=Gallus gallus (Chicken) PE=1 SV=2	K	Transcription	engrailed protein, partial [Gallus gallus]
gene3691	816	398	867	734	1323	221	323	206	117	64	1.8015	0.782613	1.71637	1.26884	3.46769	0.561872	0.60249	0.440679	0.296167	0.134545	0.0150769	-1.66081	down	--	--	--	K16068|0|fab:101821584|K16068 disintegrin and metalloproteinase domain-containing protein 22 [EC:3.4.24.-] | (RefSeq) ADAM22; ADAM metallopeptidase domain 22	--	[O]	Posttranslational modification, protein turnover, chaperones	Reprolysin (M12B) family zinc metalloprotease;; ADAM cysteine-rich;; Reprolysin family propeptide;; Disintegrin;; Metallo-peptidase family M12B Reprolysin-like;; Metallo-peptidase family M12	Disintegrin and metalloproteinase domain-containing protein 22 (Precursor) GN=adam22 OS=Xenopus laevis (African clawed frog) PE=2 SV=2	O	Posttranslational modification, protein turnover, chaperones	PREDICTED: disintegrin and metalloproteinase domain-containing protein 22, partial [Ficedula albicollis]
gene37	3150	1183	2326	3328	2149	419	590	520	539	291	15.3806	5.01058	10.0435	12.2638	9.67036	2.42935	3.1091	2.50745	3.32466	1.52408	5.27097e-05	-1.82711	down	--	--	--	--	--	[S]	Function unknown	Domain of unknown function (DUF3402);; N1221-like protein	Striatin-interacting protein 1 homolog GN=strip1 OS=Danio rerio (Zebrafish) PE=1 SV=1	S	Function unknown	PREDICTED: striatin-interacting protein 2 isoform X3 [Gallus gallus]
gene373	1169	1612	663	991	617	313	253	120	311	160	4.68938	6.02724	2.48976	3.27874	2.39358	1.32654	1.20179	0.427583	1.317	0.568116	0.00693125	-1.56765	down	--	--	Molecular Function: protein binding (GO:0001948);; Cellular Component: plasma membrane (GO:0005886);; Biological Process: cell adhesion (GO:0007155);; Biological Process: positive regulation of gene expression (GO:0010628);; Biological Process: positive regulation of sodium ion transport (GO:0010765);; Biological Process: positive regulation of neuron projection development (GO:0010976);; Biologi…	K06759|0|gga:417786|K06759 contactin 1 | (RefSeq) CNTN1, F11, contactin-1; contactin 1	Cell adhesion molecules (CAMs) (ko04514)	[T]	Signal transduction mechanisms	Immunoglobulin I-set domain;; Immunoglobulin domain;; Fibronectin type III domain;; Immunoglobulin domain;; Immunoglobulin V-set domain;; Immunoglobulin domain;; Interferon-alpha/beta receptor, fibronectin type III;; CD80-like C2-set immunoglobulin domain	Contactin-1 (Precursor) GN=CNTN1 OS=Gallus gallus (Chicken) PE=1 SV=1	T	Signal transduction mechanisms	contactin-1 preproprotein [Gallus gallus]
gene3736	79132	93194	68938	88909	38094	20459	20981	24115	15588	43974	296.425	310.393	240.187	260.306	142.131	93.1002	69.7648	85.6991	71.8506	157.822	0.00596406	-1.07785	down	--	--	Biological Process: skeletal system development (GO:0001501);; Biological Process: blood vessel development (GO:0001568);; Molecular Function: extracellular matrix structural constituent (GO:0005201);; Cellular Component: collagen type I trimer (GO:0005584);; Cellular Component: extracellular space (GO:0005615);; Biological Process: transforming growth factor beta receptor signaling pathway (GO:0…	K06236|0|gga:396243|K06236 collagen, type I, alpha | (RefSeq) COL1A2, COLA; collagen type I alpha 2 chain	Focal adhesion (ko04510);; ECM-receptor interaction (ko04512);; AGE-RAGE signaling pathway in diabetic complications (ko04933)	[W]	Extracellular structures	Collagen triple helix repeat (20 copies);; Fibrillar collagen C-terminal domain	Collagen alpha-2(I) chain (Precursor; Fragments) GN=COL1A2 OS=Gallus gallus (Chicken) PE=1 SV=2	W	Extracellular structures	collagen alpha-2(I) chain precursor [Gallus gallus]
gene3742	4026	1460	1235	1387	1752	185	341	118	138	145	17.2378	5.68908	4.65324	4.45607	6.93868	0.87941	1.21145	0.627092	0.710007	0.5497	0.0100814	-2.9634	down	[T]	Signal transduction mechanisms	Molecular Function: protein kinase activity (GO:0004672);; Molecular Function: ATP binding (GO:0005524);; Cellular Component: mitochondrial inner membrane (GO:0005743);; Biological Process: protein phosphorylation (GO:0006468);; Biological Process: regulation of pH (GO:0006885);; Biological Process: insulin receptor signaling pathway (GO:0008286);; Biological Process: cellular response to starvat…	K00898|0|gga:420570|K00898 pyruvate dehydrogenase kinase 2/3/4 [EC:2.7.11.2] | (RefSeq) PDK4; pyruvate dehydrogenase kinase 4	--	[T]	Signal transduction mechanisms	Mitochondrial branched-chain alpha-ketoacid dehydrogenase kinase;; Histidine kinase-, DNA gyrase B-, and HSP90-like ATPase	--	T	Signal transduction mechanisms	pyruvate dehydrogenase kinase, isozyme 4 [Gallus gallus]
gene3776	1816	1495	1523	2444	1003	500	388	533	442	1036	8.25894	5.9715	5.99296	8.91768	4.33178	2.56695	1.51953	2.3264	2.26344	4.83001	0.00646215	-1.01442	down	--	--	Molecular Function: actin binding (GO:0003779);; Cellular Component: cytoplasm (GO:0005737);; Cellular Component: cytoskeleton (GO:0005856);; Biological Process: negative regulation of cell proliferation (GO:0008285);; Biological Process: regulation of chondrocyte differentiation (GO:0032330);; Biological Process: positive regulation of apoptotic process (GO:0043065);; Biological Process: positiv…	K05768|0|gga:420588|K05768 gelsolin | (RefSeq) SCIN; scinderin	Regulation of actin cytoskeleton (ko04810)	[Z]	Cytoskeleton	Gelsolin repeat	Adseverin GN=SCIN OS=Gallus gallus (Chicken) PE=2 SV=2	Z	Cytoskeleton	adseverin [Gallus gallus]
gene3874	176	170	194	236	143	0	0	0	0	0	3.88034	3.41854	3.85684	4.12852	3.07721	0	0	0	0	0	4.5066e-23	#NAME?	down	--	--	Molecular Function: transcription factor activity, sequence-specific DNA binding (GO:0003700);; Cellular Component: nucleus (GO:0005634);; Biological Process: transcription, DNA-templated (GO:0006351);; Biological Process: multicellular organism development (GO:0007275);; Molecular Function: sequence-specific DNA binding (GO:0043565);;	--	--	[K]	Transcription	Hox protein A13 N terminal;; Homeobox domain	Homeobox protein Hox-A13 GN=HOXA13 OS=Gallus gallus (Chicken) PE=2 SV=1	K	Transcription	homeobox protein Hox-A13 [Gallus gallus]
gene3890	534	796	628	837	719	165	266	206	200	279	3.94077	5.3508	4.16979	4.88055	5.18705	1.43345	1.69901	1.5102	1.73534	2.04118	0.0137078	-1.15961	down	--	--	Cellular Component: nucleolus (GO:0005730);; Biological Process: biotin metabolic process (GO:0006768);; Cellular Component: perikaryon (GO:0043204);; Cellular Component: apical part of cell (GO:0045177);; Molecular Function: biotinidase activity (GO:0047708);;	K01435|0|gga:420639|K01435 biotinidase [EC:3.5.1.12] | (RefSeq) BTD; biotinidase	Biotin metabolism (ko00780)	[E]	Amino acid transport and metabolism	Carbon-nitrogen hydrolase	Biotinidase (Precursor) GN=btd OS=Takifugu rubripes (Japanese pufferfish) PE=3 SV=1	E	Amino acid transport and metabolism	biotinidase [Gallus gallus]
gene3913	3523	2670	2521	3041	3369	404	242	441	325	555	15.5264	11.356	9.44751	11.0046	13.5086	2.22876	0.899232	1.92925	1.48661	2.40556	5.27429e-19	-2.44702	down	--	--	--	--	--	--	--	Zinc-finger of C2H2 type;; Zinc-finger double-stranded RNA-binding;; C2H2 type zinc-finger (2 copies);; A-kinase anchoring protein 95 (AKAP95);; U1 zinc finger	Zinc finger protein 385B GN=znf385b OS=Danio rerio (Zebrafish) PE=2 SV=1	R	General function prediction only	PREDICTED: zinc finger protein 385D isoform X1 [Corvus cornix cornix]
gene3916	352	706	474	521	350	103	154	126	141	254	4.46175	8.18265	5.40499	5.21916	4.31627	1.53302	1.69069	1.58679	2.11067	3.19464	0.0449332	-1.1384	down	--	--	Molecular Function: ubiquitin-protein transferase activity (GO:0004842);; Biological Process: ISG15-protein conjugation (GO:0032020);; Molecular Function: ISG15 transferase activity (GO:0042296);; Biological Process: protein K63-linked ubiquitination (GO:0070534);; Biological Process: protein K48-linked ubiquitination (GO:0070936);; Biological Process: protein K11-linked ubiquitination (GO:007097…	K20217|4.81965e-99|fab:101818227|K20217 ubiquitin-conjugating enzyme E2 E [EC:2.3.2.23] | (RefSeq) UBE2E2; ubiquitin-conjugating enzyme E2 E2	Ubiquitin mediated proteolysis (ko04120)	[O]	Posttranslational modification, protein turnover, chaperones	Ubiquitin-conjugating enzyme	Ubiquitin-conjugating enzyme E2 D2 GN=ube2d2 OS=Xenopus laevis (African clawed frog) PE=1 SV=1	O	Posttranslational modification, protein turnover, chaperones	PREDICTED: ubiquitin-conjugating enzyme E2 E2 [Ficedula albicollis]
gene402	15612	9274	9959	9770	16539	4165	5241	4536	3130	4552	47.0339	25.2308	27.1957	23.4659	49.564	15.2965	13.8381	13.7441	11.1975	14.1344	0.0325296	-1.03242	down	--	--	Cellular Component: plasma membrane (GO:0005886);; Biological Process: sodium ion transport (GO:0006814);; Biological Process: amino acid transport (GO:0006865);; Molecular Function: amino acid transmembrane transporter activity (GO:0015171);; Molecular Function: symporter activity (GO:0015293);; Cellular Component: integral component of membrane (GO:0016021);;	K14207|0|mgp:100540668|K14207 solute carrier family 38 (sodium-coupled neutral amino acid transporter), member 2 | (RefSeq) sodium-coupled neutral amino acid transporter 2	--	[E]	Amino acid transport and metabolism	Transmembrane amino acid transporter protein	Sodium-coupled neutral amino acid transporter 2 GN=SLC38A2 OS=Gallus gallus (Chicken) PE=2 SV=2	E	Amino acid transport and metabolism	RecName: Full=Sodium-coupled neutral amino acid transporter 2; AltName: Full=Amino acid transporter A2; AltName: Full=Solute carrier family 38 member 2; AltName: Full=System A amino acid transporter 2; AltName: Full=System A transporter 1; AltName: Full=System N amino acid transporter 2 [Gallus gallus]
gene403	2732	1780	2275	2438	3202	141	512	583	249	321	14.0602	8.05195	10.609	10.4153	15.5299	0.701825	2.56471	3.5375	1.5963	2.18684	1.76252e-09	-2.3268	down	--	--	Cellular Component: integral component of membrane (GO:0016021);;	K14991|0|gga:417809|K14991 solute carrier family 38 (sodium-coupled neutral amino acid transporter), member 4 | (RefSeq) SLC38A4; solute carrier family 38 member 4	--	[E]	Amino acid transport and metabolism	Transmembrane amino acid transporter protein	Sodium-coupled neutral amino acid transporter 2 GN=SLC38A2 OS=Gallus gallus (Chicken) PE=2 SV=2	E	Amino acid transport and metabolism	sodium-coupled neutral amino acid transporter 4 [Gallus gallus]
gene4085	376	216	320	252	260	12	95	22	9	31	1.931	0.842562	1.29937	0.944768	1.18439	0.198858	0.312425	0.301612	0.150445	0.440007	1.03439e-05	-2.68978	down	--	--	Biological Process: negative regulation of transcription from RNA polymerase II promoter (GO:0000122);; Molecular Function: RNA polymerase II regulatory region sequence-specific DNA binding (GO:0000977);; Molecular Function: RNA polymerase II activating transcription factor binding (GO:0001102);; Molecular Function: RNA polymerase II transcription coactivator activity (GO:0001105);; Biological Pr…	K10185|0|gga:373943|K10185 T-box protein 20 | (RefSeq) TBX20; T-box 20	--	[K]	Transcription	T-box	T-box transcription factor TBX20 GN=TBX20 OS=Gallus gallus (Chicken) PE=2 SV=1	K	Transcription	T-box transcription factor TBX20 [Gallus gallus]
gene4090	590	1047	647	980	442	168	165	179	165	349	4.19211	6.53189	3.47277	4.4982	2.50146	1.14728	1.00815	1.22433	1.16315	2.45918	0.00254353	-1.35168	down	--	--	Biological Process: ureteric bud development (GO:0001657);; Biological Process: blood vessel endothelial cell proliferation involved in sprouting angiogenesis (GO:0002043);; Cellular Component: extracellular space (GO:0005615);; Biological Process: regulation of endothelial cell migration (GO:0010594);; Biological Process: negative regulation of BMP signaling pathway (GO:0030514);; Biological Pro…	--	--	[WV]	Extracellular structures;; Defense mechanisms	von Willebrand factor type D domain;; von Willebrand factor type C domain;; C8 domain;; Trypsin Inhibitor like cysteine rich domain	Kielin/chordin-like protein (Precursor) GN=kcp OS=Xenopus laevis (African clawed frog) PE=2 SV=1	VW	Defense mechanisms;; Extracellular structures	BMP-binding endothelial regulator protein precursor [Gallus gallus]
gene412	914	337	788	638	1878	93	81	69	55	116	3.44036	1.43214	2.61094	1.85905	6.8491	0.3913	0.431405	0.24502	0.231703	0.412701	0.0169556	-3.00916	down	--	--	Molecular Function: secondary active monocarboxylate transmembrane transporter activity (GO:0015355);; Cellular Component: integral component of membrane (GO:0016021);;	K08184|0|gga:417815|K08184 MFS transporter, MCP family, solute carrier family 16 (monocarboxylic acid transporters), member 7 | (RefSeq) SLC16A7; solute carrier family 16 member 7	--	[G]	Carbohydrate transport and metabolism	Major Facilitator Superfamily;; MFS_1 like family	Monocarboxylate transporter 3 GN=SLC16A3 OS=Gallus gallus (Chicken) PE=2 SV=2	G	Carbohydrate transport and metabolism	monocarboxylate transporter 2 [Gallus gallus]
gene4324	72	178	200	251	148	20	21	17	30	95	1.24707	2.80392	3.11087	3.4426	2.46114	0.40509	0.27492	0.286151	0.593036	1.60631	0.0141303	-1.74171	down	--	--	Biological Process: nervous system development (GO:0007399);; Cellular Component: cell junction (GO:0030054);; Cellular Component: anchored component of membrane (GO:0031225);; Cellular Component: AMPA glutamate receptor complex (GO:0032281);; Cellular Component: synapse (GO:0045202);;	--	--	--	--	Neuritin protein family	Neuritin (Precursor) GN=nrn1 OS=Danio rerio (Zebrafish) PE=2 SV=1	W	Extracellular structures	neuritin precursor [Gallus gallus]
gene4348	3018	2143	2563	2603	2785	750	1164	901	751	1098	11.5187	9.31211	8.79181	7.89224	10.3819	3.2904	3.85616	4.01693	3.32801	5.10786	0.00124023	-1.01336	down	[T]	Signal transduction mechanisms	--	K14165|8.71381e-149|mgp:100543610|K14165 atypical dual specificity phosphatase [EC:3.1.3.16 3.1.3.48] | (RefSeq) DUSP22; dual specificity phosphatase 22	--	[V]	Defense mechanisms	Dual specificity phosphatase, catalytic domain;; Protein-tyrosine phosphatase	Dual specificity protein phosphatase 22 GN=dusp22 OS=Xenopus tropicalis (Western clawed frog) PE=2 SV=1	V	Defense mechanisms	PREDICTED: dual specificity protein phosphatase 22 isoform X2 [Gallus gallus]
gene453	1188	2505	1460	1905	1440	501	752	784	419	515	6.86782	13.3919	9.46026	9.71612	8.31589	4.05454	4.7241	4.13069	3.10631	3.54467	0.00509348	-1.01035	down	--	--	Molecular Function: metallocarboxypeptidase activity (GO:0004181);; Cellular Component: nucleus (GO:0005634);; Cellular Component: cytoplasm (GO:0005737);; Cellular Component: plasma membrane (GO:0005886);; Biological Process: proteolysis (GO:0006508);; Molecular Function: zinc ion binding (GO:0008270);;	K01296|0|gga:417843|K01296 carboxypeptidase M [EC:3.4.17.12] | (RefSeq) CPM; carboxypeptidase M	--	[R]	General function prediction only	Zinc carboxypeptidase;; Carboxypeptidase regulatory-like domain;; Succinylglutamate desuccinylase / Aspartoacylase family	Carboxypeptidase D (Fragment) GN=CPD OS=Lophonetta specularioides (Crested duck) PE=1 SV=1	R	General function prediction only	carboxypeptidase M precursor [Gallus gallus]
gene4580	731	865	868	1273	526	262	217	254	204	540	6.49414	7.01155	6.94719	8.95413	4.56469	2.74867	1.66597	2.23972	2.13346	4.75413	0.0217451	-1.02844	down	--	--	--	--	--	--	--	Protein-kinase domain of FAM69;; N-term cysteine-rich ER, FAM69	Protein FAM69A GN=fam69a OS=Danio rerio (Zebrafish) PE=2 SV=1	S	Function unknown	PREDICTED: protein FAM69C isoform X2 [Gallus gallus]
gene4682	3692	5211	2773	3988	1791	823	745	882	582	1570	10.4329	13.4243	7.05398	8.9108	4.9456	2.73858	1.82106	2.4807	1.93826	4.39949	0.00368078	-1.44061	down	--	--	--	--	--	--	--	EMI domain;; C1q domain	--	R	General function prediction only	PREDICTED: EMILIN-2 [Gallus gallus]
gene4735	694	786	519	818	290	18	48	111	18	59	7.61854	7.60043	4.51408	7.11837	3.08487	0.138001	0.403634	1.12381	0.205179	0.724334	3.40717e-10	-3.14219	down	--	--	Molecular Function: N-acetylgalactosamine 4-O-sulfotransferase activity (GO:0001537);; Biological Process: sulfur compound metabolic process (GO:0006790);; Cellular Component: integral component of membrane (GO:0016021);; Biological Process: carbohydrate biosynthetic process (GO:0016051);;	K09673|0|gga:421089|K09673 carbohydrate 4-sulfotransferase 9 [EC:2.8.2.-] | (RefSeq) CHST9; carbohydrate sulfotransferase 9	--	[MW]	Cell wall/membrane/envelope biogenesis;; Extracellular structures	Sulfotransferase family	Carbohydrate sulfotransferase 11 GN=chst11 OS=Danio rerio (Zebrafish) PE=2 SV=1	O	Posttranslational modification, protein turnover, chaperones	PREDICTED: carbohydrate sulfotransferase 9 isoform X5 [Gallus gallus]
gene4781	2472	1150	3822	853	1522	0	0	0	0	0	41.7147	18.3458	58.7609	11.7842	24.3757	0	0	0	0	0	1.27503e-17	#NAME?	down	--	--	Biological Process: multicellular organism development (GO:0007275);; Biological Process: cell differentiation (GO:0030154);;	--	--	--	--	--	--	S	Function unknown	pancreatic progenitor cell differentiation and proliferation factor-like protein [Gallus gallus]
gene4802	307	344	346	257	360	59	80	44	49	117	4.86966	4.14616	4.05581	4.17031	5.38215	0.896985	1.04936	0.622184	0.743321	1.51041	0.00369984	-1.7551	down	--	--	Biological Process: cell fate determination (GO:0001709);; Biological Process: endodermal cell fate commitment (GO:0001711);; Biological Process: embryonic heart tube morphogenesis (GO:0003143);; Biological Process: endocardium development (GO:0003157);; Molecular Function: transcription factor activity, sequence-specific DNA binding (GO:0003700);; Cellular Component: nucleus (GO:0005634);; Biolo…	K04495|7.18101e-157|gga:428534|K04495 transcription factor SOX17 (SOX group F) | (RefSeq) SOX17; SRY-box 17	Wnt signaling pathway (ko04310)	[K]	Transcription	Sox C-terminal transactivation domain;; HMG (high mobility group) box;; HMG-box domain	Transcription factor Sox-17-alpha-A GN=sox17a-a OS=Xenopus laevis (African clawed frog) PE=1 SV=1	K	Transcription	transcription factor SOX-17 [Gallus gallus]
gene4933	317	361	386	598	324	15	21	22	8	169	1.73057	1.11501	1.79181	2.06909	1.26801	0.26218	0.274546	0.327583	0.133501	0.608134	1.66559e-06	-2.7047	down	[S]	Function unknown	Cellular Component: extracellular region (GO:0005576);; Molecular Function: peptidase inhibitor activity (GO:0030414);;	--	--	[S]	Function unknown	Cysteine-rich secretory protein family	Peptidase inhibitor 15 (Precursor) GN=PI15 OS=Gallus gallus (Chicken) PE=2 SV=1	S	Function unknown	peptidase inhibitor 15 precursor [Gallus gallus]
gene4993	1966	3035	3482	3856	3817	690	1529	1053	1026	999	14.9965	21.3296	24.2666	23.7155	28.6099	6.65493	10.392	8.60453	9.79089	8.13873	0.000172009	-1.10611	down	[IQR]	Lipid transport and metabolism;; Secondary metabolites biosynthesis, transport and catabolism;; General function prediction only	Cellular Component: nucleus (GO:0005634);; Cellular Component: mitochondrion (GO:0005739);; Biological Process: fatty acid beta-oxidation (GO:0006635);; Molecular Function: 2,4-dienoyl-CoA reductase (NADPH) activity (GO:0008670);; Biological Process: protein homotetramerization (GO:0051289);; Molecular Function: NADPH binding (GO:0070402);;	K13236|0|gga:420218|K13236 2,4-dienoyl-CoA reductase, mitochondrial [EC:1.3.1.34] | (RefSeq) DECR1; 2,4-dienoyl-CoA reductase 1, mitochondrial	--	[R]	General function prediction only	Enoyl-(Acyl carrier protein) reductase;; short chain dehydrogenase;; KR domain;; NAD dependent epimerase/dehydratase family	Peroxisomal 2,4-dienoyl-CoA reductase GN=decr2 OS=Danio rerio (Zebrafish) PE=2 SV=1	Q	Secondary metabolites biosynthesis, transport and catabolism	PREDICTED: 2,4-dienoyl-CoA reductase, mitochondrial [Gallus gallus]
gene4997	85	241	299	257	427	7	17	9	21	38	1.08432	3.06318	4.04129	3.30977	6.85048	0.119353	0.183574	0.101769	0.397365	0.538276	6.48152e-05	-3.37083	down	--	--	Molecular Function: calcium ion binding (GO:0005509);;	--	--	--	--	Antibiotic biosynthesis monooxygenase;; EF hand;; EF hand;; EF-hand domain pair;; EF-hand domain pair	--	T	Signal transduction mechanisms	N-terminal EF-hand calcium-binding protein 1 [Gallus gallus]
gene5011	2327	3574	2308	2298	1551	979	883	796	392	1046	36.4093	50.9808	32.5053	28.4307	23.7162	18.0479	11.953	12.3817	7.226	16.2235	0.00843763	-1.06686	down	[R]	General function prediction only	--	K07846|0|apla:101793626|K07846 GTP binding protein overexpressed in skeletal muscle | (RefSeq) GEM; GTP binding protein overexpressed in skeletal muscle	--	[R]	General function prediction only	Ras family;; Miro-like protein;; Ferrous iron transport protein B	Ras-related protein O-RAL (Precursor) OS=Diplobatis ommata (Ocellated electric ray) PE=2 SV=1	R	General function prediction only	GTP-binding protein GEM [Podiceps cristatus]
gene5127	538	1345	826	1201	530	207	171	195	160	276	3.37198	7.53001	4.59061	5.89093	3.23424	1.52087	0.813859	1.08214	1.05326	1.50505	0.00104699	-1.60937	down	[R]	General function prediction only	--	K01122|0|apla:101799123|K01122 ectonucleotide pyrophosphatase/phosphodiesterase family member 2 [EC:3.1.4.39] | (RefSeq) ENPP2; ectonucleotide pyrophosphatase/phosphodiesterase 2	Ether lipid metabolism (ko00565)	[R]	General function prediction only	Type I phosphodiesterase / nucleotide pyrophosphatase;; Somatomedin B domain;; DNA/RNA non-specific endonuclease	Nucleotide pyrophosphatase (Precursor) OS=Crotalus adamanteus (Eastern diamondback rattlesnake) PE=1 SV=2	R	General function prediction only	PREDICTED: ectonucleotide pyrophosphatase/phosphodiesterase family member 2 isoform X4 [Meleagris gallopavo]
gene5132	2060	1163	1462	2426	961	447	627	503	346	664	8.7131	3.74461	4.75459	6.73921	3.05163	1.82604	2.3344	1.71509	1.32193	2.83286	0.00915621	-1.14688	down	--	--	Cellular Component: collagen trimer (GO:0005581);; Biological Process: cell adhesion (GO:0007155);;	K08133|0|gga:396276|K08133 collagen, type XIV, alpha | (RefSeq) COL14A1, COL14; collagen type XIV alpha 1 chain	--	[W]	Extracellular structures	von Willebrand factor type A domain;; Fibronectin type III domain;; Collagen triple helix repeat (20 copies);; von Willebrand factor type A domain;; Interferon-alpha/beta receptor, fibronectin type III	Collagen alpha-1(XIV) chain (Precursor) GN=COL14A1 OS=Gallus gallus (Chicken) PE=1 SV=2	W	Extracellular structures	collagen alpha-1(XIV) chain precursor [Gallus gallus]
gene5135	3272	4204	2935	2867	3794	867	1199	918	848	1314	16.636	19.4939	13.4446	11.5341	18.8537	5.20681	5.27522	4.64356	5.07516	6.63115	1.63816e-05	-1.25454	down	--	--	Molecular Function: phospholipid binding (GO:0005543);; Cellular Component: protein complex (GO:0043234);; Cellular Component: synapse (GO:0045202);;	--	--	[W]	Extracellular structures	PDZ domain (Also known as DHR or GLGF);; PH domain	Disks large homolog 4 GN=dlg4 OS=Danio rerio (Zebrafish) PE=2 SV=1	W	Extracellular structures	beta-1-syntrophin [Gallus gallus]
gene5217	869	1302	171	636	203	25	40	59	133	71	2.15132	2.93724	0.380705	1.24451	0.490948	0.072577	0.08456	0.143848	0.38622	0.172617	0.043073	-2.72492	down	--	--	--	K16630|0|gga:420315|K16630 collagen, type XXII, alpha | (RefSeq) COL22A1; collagen type XXII alpha 1 chain	--	[T]	Signal transduction mechanisms	Collagen triple helix repeat (20 copies);; von Willebrand factor type A domain;; von Willebrand factor type A domain	Collagen alpha-1(XXI) chain (Precursor) GN=col21a1 OS=Xenopus laevis (African clawed frog) PE=2 SV=1	W	Extracellular structures	collagen, type XXII, alpha 1 precursor [Gallus gallus]
gene5351	1295	1447	1442	2894	1973	476	581	463	620	906	11.5941	11.7936	11.6262	20.5438	17.2759	4.96716	4.39853	4.00379	6.49658	7.99132	0.00473988	-1.05765	down	[V]	Defense mechanisms	Molecular Function: ATP binding (GO:0005524);; Cellular Component: mitochondrial inner membrane (GO:0005743);; Biological Process: obsolete ATP catabolic process (GO:0006200);; Cellular Component: integral component of membrane (GO:0016021);; Molecular Function: ATPase activity, coupled to transmembrane movement of substances (GO:0042626);; Biological Process: transmembrane transport (GO:0055085)…	K05655|0|fpg:101913702|K05655 ATP-binding cassette, subfamily B (MDR/TAP), member 8 | (RefSeq) ABCB8; ATP binding cassette subfamily B member 8	ABC transporters (ko02010)	[U]	Intracellular trafficking, secretion, and vesicular transport	ABC transporter transmembrane region;; ABC transporter;; Protein of unknown function (DUF1602)	ATP-binding cassette sub-family B member 8, mitochondrial (Precursor) GN=abcb8 OS=Danio rerio (Zebrafish) PE=2 SV=1	Q	Secondary metabolites biosynthesis, transport and catabolism	PREDICTED: ATP-binding cassette sub-family B member 8, mitochondrial [Melopsittacus undulatus]
gene5352	644	538	488	749	732	116	95	38	261	201	48.334	36.7977	32.9093	44.4898	53.4563	10.307	5.92105	2.82086	22.9954	14.9514	0.000326006	-1.60182	down	--	--	--	--	--	--	--	--	--	--	--	--
gene5478	4297	5621	2988	6817	5648	1158	881	738	1611	1470	42.679	50.8742	26.7774	53.296	54.758	13.5585	7.5255	7.24961	18.8295	14.5335	7.00801e-06	-1.57364	down	--	--	--	K17907|0|xtr:100486160|K17907 autophagy-related protein 9 | (RefSeq) atg9b, apg9l2, nos3as, sone; autophagy related 9B	--	[R]	General function prediction only	Autophagy protein Apg9	--	U	Intracellular trafficking, secretion, and vesicular transport	PREDICTED: autophagy-related protein 9B [Haliaeetus leucocephalus]
gene5570	563	627	823	859	595	0	0	0	0	0	35.0841	35.6377	46.23	42.3516	36.2788	0	0	0	0	0	3.01335e-49	#NAME?	down	[K]	Transcription	Molecular Function: transcription regulatory region sequence-specific DNA binding (GO:0000976);; Molecular Function: transcription factor activity, sequence-specific DNA binding (GO:0003700);; Cellular Component: nucleus (GO:0005634);; Biological Process: axon guidance (GO:0007411);; Cellular Component: lamellipodium (GO:0030027);; Cellular Component: filopodium (GO:0030175);; Cellular Component:…	K09319|1.44919e-54|fab:101807749|K09319 homeobox protein engrailed | (RefSeq) EN2; engrailed homeobox 2	--	[R]	General function prediction only	Homeobox domain;; Engrailed homeobox C-terminal signature domain;; Homeobox KN domain	Homeobox protein engrailed-2 GN=EN2 OS=Gallus gallus (Chicken) PE=1 SV=2	K	Transcription	PREDICTED: homeobox protein engrailed-2 [Geospiza fortis]
gene5631	413	1090	541	779	228	65	65	94	82	159	2.71625	6.53911	3.20123	4.0561	1.46679	0.502979	0.370426	0.613595	0.630361	1.03643	0.00655721	-2.20325	down	--	--	Molecular Function: calcium ion binding (GO:0005509);;	K17342|0|gga:421229|K17342 fibulin 7 | (RefSeq) FBLN7; fibulin 7	--	[T]	Signal transduction mechanisms	Calcium-binding EGF domain;; Complement Clr-like EGF-like;; EGF-like domain;; Sushi domain (SCR repeat);; Coagulation Factor Xa inhibitory site;; EGF-like domain	Fibulin-1 (Precursor) GN=FBLN1 OS=Gallus gallus (Chicken) PE=2 SV=2	T	Signal transduction mechanisms	PREDICTED: fibulin-7-like [Gallus gallus]
gene5696	132	108	156	192	235	32	27	30	43	63	0.930672	0.720146	1.33346	1.18487	1.74036	0.255359	0.164758	0.214908	0.758821	0.534734	0.0251771	-1.578	down	--	--	Cellular Component: Golgi apparatus (GO:0005794);; Biological Process: protein glycosylation (GO:0006486);; Cellular Component: integral component of membrane (GO:0016021);; Molecular Function: transferase activity, transferring glycosyl groups (GO:0016757);;	K00710|0|gga:421305|K00710 polypeptide N-acetylgalactosaminyltransferase [EC:2.4.1.41] | (RefSeq) GALNT14; polypeptide N-acetylgalactosaminyltransferase 14	Mucin type O-Glycan biosynthesis (ko00512)	[O]	Posttranslational modification, protein turnover, chaperones	Glycosyl transferase family 2;; Ricin-type beta-trefoil lectin domain;; N-terminal domain of galactosyltransferase;; Glycosyltransferase like family 2	Polypeptide N-acetylgalactosaminyltransferase 11 GN=galnt11 OS=Xenopus tropicalis (Western clawed frog) PE=1 SV=2	O	Posttranslational modification, protein turnover, chaperones	PREDICTED: polypeptide N-acetylgalactosaminyltransferase 14 isoform X5 [Gallus gallus]
gene6074	13694	16223	12901	17673	15705	7192	2959	2490	7830	2875	98.5667	111.704	89.2074	107.689	115.769	61.992	19.9088	18.7122	67.4637	21.8391	0.00244343	-1.10167	down	[T]	Signal transduction mechanisms	Molecular Function: phosphoprotein phosphatase activity (GO:0004721);; Cellular Component: nucleus (GO:0005634);; Cellular Component: cytoplasm (GO:0005737);; Biological Process: glycogen metabolic process (GO:0005977);; Biological Process: cell cycle (GO:0007049);; Biological Process: regulation of cell adhesion (GO:0030155);; Molecular Function: metal ion binding (GO:0046872);; Molecular Functi…	K14621|0|tgu:100232535|K14621 phospholipase B1, membrane-associated [EC:3.1.1.4 3.1.1.5] | (RefSeq) PLB1; uncharacterized LOC100232535	Glycerophospholipid metabolism (ko00564);; Ether lipid metabolism (ko00565);; Arachidonic acid metabolism (ko00590);; Linoleic acid metabolism (ko00591);; alpha-Linolenic acid metabolism (ko00592)	[TR]	Signal transduction mechanisms;; General function prediction only	Calcineurin-like phosphoesterase	Serine/threonine-protein phosphatase PP1-beta catalytic subunit GN=ppp1cb OS=Xenopus tropicalis (Western clawed frog) PE=2 SV=1	T	Signal transduction mechanisms	PREDICTED: phospholipase B1, membrane-associated [Taeniopygia guttata]
gene6459	893	476	892	1463	1313	213	257	119	154	273	3.95001	1.86333	3.56422	5.45323	5.78321	1.5823	0.946688	0.478899	1.11783	1.12781	0.000323501	-1.81683	down	[T]	Signal transduction mechanisms	Molecular Function: nucleotide binding (GO:0000166);; Molecular Function: nucleic acid binding (GO:0003676);; Molecular Function: phosphoric ester hydrolase activity (GO:0042578);; Biological Process: phosphatidylinositol dephosphorylation (GO:0046856);;	K20279|0|gga:421656|K20279 synaptojanin [EC:3.1.3.36] | (RefSeq) SYNJ2; synaptojanin 2	Inositol phosphate metabolism (ko00562);; Phosphatidylinositol signaling system (ko04070)	[U]	Intracellular trafficking, secretion, and vesicular transport	SacI homology domain;; Domain of unknown function (DUF1866);; Endonuclease/Exonuclease/phosphatase family	Phosphatidylinositide phosphatase SAC2 GN=inpp5f OS=Danio rerio (Zebrafish) PE=3 SV=1	T	Signal transduction mechanisms	PREDICTED: synaptojanin-2 isoform X1 [Gallus gallus]
gene6500	596	770	520	216	467	107	207	61	60	60	1.41169	1.77413	0.747395	0.272947	0.729483	0.619255	0.285318	0.096222	0.111552	0.094302	0.00232885	-1.91653	down	--	--	Molecular Function: ARF guanyl-nucleotide exchange factor activity (GO:0005086);; Biological Process: negative regulation of phosphatase activity (GO:0010923);; Biological Process: regulation of ARF protein signal transduction (GO:0032012);;	K17572|0|gga:421681|K17572 brefeldin A-inhibited guanine nucleotide-exchange protein 3 | (RefSeq) ARFGEF3, KIAA1244; ARFGEF family member 3	--	[U]	Intracellular trafficking, secretion, and vesicular transport	Domain of unknown function (DUF1981)	--	U	Intracellular trafficking, secretion, and vesicular transport	PREDICTED: brefeldin A-inhibited guanine nucleotide-exchange protein 3 isoform X12 [Gallus gallus]
gene6577	1566	597	811	837	2368	160	111	152	37	249	3.4225	1.16837	2.02291	1.50741	5.05209	0.413763	0.209427	0.316769	0.094673	0.651107	0.0200708	-2.70968	down	--	--	--	--	--	--	--	Domain of unknown function (DUF4482)	--	S	Function unknown	PREDICTED: LOW QUALITY PROTEIN: uncharacterized protein KIAA0408 homolog [Gallus gallus]
gene6779	741	939	831	1111	840	230	313	247	210	496	18.5334	21.4175	18.5698	22.1471	20.8881	6.93933	6.82521	5.90672	6.43955	11.0844	0.012783	-1.10057	down	--	--	Cellular Component: mitochondrion (GO:0005739);;	--	--	--	--	Complex 1 protein (LYR family);; Complex1_LYR-like;; Complex1_LYR-like	LYR motif-containing protein 2 GN=lyrm2 OS=Xenopus tropicalis (Western clawed frog) PE=3 SV=1	S	Function unknown	LYR motif-containing protein 2 [Gallus gallus]
gene679	1659	2284	2272	2147	1570	523	720	742	341	1048	11.911	14.9464	14.6681	12.1855	11.011	4.42412	4.47311	5.29062	2.8789	7.44122	0.00108498	-1.08733	down	--	--	Cellular Component: mitochondrion (GO:0005739);; Cellular Component: cytosol (GO:0005829);; Molecular Function: heme binding (GO:0020037);;	--	--	--	--	SOUL heme-binding protein	Heme-binding protein 1 GN=HEBP1 OS=Gallus gallus (Chicken) PE=2 SV=1	R	General function prediction only	heme-binding protein 1 [Gallus gallus]
gene680	124	364	237	165	107	43	36	60	10	65	1.02708	2.80718	1.82269	1.1064	0.930329	0.365302	0.250974	0.442436	0.085815	0.583746	0.0322169	-1.74256	down	--	--	--	--	--	--	--	--	--	R	General function prediction only	PREDICTED: uncharacterized protein LOC417962 isoform X2 [Gallus gallus]
gene683	1437	2270	832	2310	522	348	200	210	249	657	13.5882	19.5732	7.07879	17.2732	4.82374	3.8734	1.63083	1.97329	2.76886	6.16163	0.038644	-1.63895	down	--	--	Cellular Component: integral component of membrane (GO:0016021);; Biological Process: cell growth (GO:0016049);;	--	--	--	--	PMP-22/EMP/MP20/Claudin family	Epithelial membrane protein 2 OS=Danio rerio (Zebrafish) PE=2 SV=2	S	Function unknown	epithelial membrane protein 1 [Gallus gallus]
gene6864	533	771	331	526	197	115	69	118	72	106	0.795311	1.05086	0.444485	0.621594	0.795247	0.201257	0.089118	0.175517	0.125524	0.156892	0.00732536	-1.76863	down	--	--	Molecular Function: endopeptidase inhibitor activity (GO:0004866);; Cellular Component: extracellular space (GO:0005615);;	K06530|0|gga:421862|K06530 CD109 antigen | (RefSeq) CD109; CD109 molecule	--	[O]	Posttranslational modification, protein turnover, chaperones	A-macroglobulin complement component;; Alpha-2-macroglobulin family N-terminal region;; Alpha-2-macroglobulin family;; MG2 domain;; A-macroglobulin receptor;; Alpha-macro-globulin thiol-ester bond-forming region;; Prenyltransferase-like	Ovostatin (Precursor) OS=Gallus gallus (Chicken) PE=1 SV=3	O	Posttranslational modification, protein turnover, chaperones	PREDICTED: CD109 antigen isoform X3 [Gallus gallus]
gene7008	282	672	553	680	372	107	139	178	110	283	5.51258	12.1525	9.88365	10.6606	7.19657	1.68971	2.27753	3.48028	2.52797	5.76558	0.0368208	-1.15664	down	--	--	--	--	--	--	--	--	--	--	--	PREDICTED: cystin-1 [Zonotrichia albicollis]
gene7098	136	186	162	279	215	26	61	31	46	65	1.04496	1.3034	1.12339	1.69518	1.61177	0.228464	0.404518	0.236531	0.410846	0.493869	0.0200708	-1.60535	down	--	--	Cellular Component: endoplasmic reticulum (GO:0005783);; Cellular Component: plasma membrane (GO:0005886);;	--	--	--	--	Fibronectin type III domain	Irisin (Precursor) GN=fndc5 OS=Danio rerio (Zebrafish) PE=3 SV=1	S	Function unknown	PREDICTED: fibronectin type III domain-containing protein 5 isoform X5 [Gallus gallus]
gene7112	2170	3082	2812	4837	3612	626	784	1256	1076	2124	138.358	179.159	161.415	243.894	225.06	47.0552	43.2571	79.666	80.8991	134.278	0.00992443	-1.00197	down	--	--	Molecular Function: transferase activity (GO:0016740);;	--	--	--	--	Oligosaccaryltransferase	--	S	Function unknown	oligosaccharyltransferase 4 homolog [Gallus gallus]
gene7113	704	1387	1179	1711	905	246	325	299	241	429	5.48906	9.85992	8.83651	10.5529	6.89696	2.25706	2.19411	2.31368	2.21092	3.31534	9.52677e-05	-1.42329	down	--	--	Biological Process: hemopoiesis (GO:0030097);;	--	--	--	--	EMI domain;; C1q domain	--	W	Extracellular structures	PREDICTED: EMILIN-1 [Pseudopodoces humilis]
gene7147	541	724	522	722	762	193	264	149	165	311	6.23272	7.59621	5.34612	6.5167	8.55241	2.61491	2.83224	1.69246	2.2907	3.51859	0.0245814	-1.12028	down	[R]	General function prediction only	Molecular Function: magnesium ion binding (GO:0000287);; Molecular Function: phosphatase activity (GO:0003869);; Molecular Function: epoxide hydrolase activity (GO:0004301);; Molecular Function: receptor binding (GO:0005102);; Cellular Component: nucleolus (GO:0005730);; Cellular Component: peroxisome (GO:0005777);; Cellular Component: Golgi apparatus (GO:0005794);; Cellular Component: focal adhe…	K08726|0|gga:421999|K08726 soluble epoxide hydrolase / lipid-phosphate phosphatase [EC:3.3.2.10 3.1.3.76] | (RefSeq) EPHX2; epoxide hydrolase 2	Arachidonic acid metabolism (ko00590);; Peroxisome (ko04146)	[I]	Lipid transport and metabolism	Alpha/beta hydrolase family;; alpha/beta hydrolase fold;; Haloacid dehalogenase-like hydrolase;; Alpha/beta hydrolase family;; HAD-hyrolase-like	Epoxide hydrolase 3 GN=ephx3 OS=Xenopus tropicalis (Western clawed frog) PE=2 SV=1	I	Lipid transport and metabolism	epoxide hydrolase 2 [Gallus gallus]
gene7663	69175	45300	55565	105437	83218	1835	2292	1626	1234	4130	771.318	459.142	557.381	929.138	906.638	23.7731	21.8315	17.7801	16.0057	45.0632	6.51089e-22	-4.55288	down	--	--	Biological Process: regulation of membrane depolarization (GO:0003254);; Cellular Component: nucleus (GO:0005634);; Cellular Component: cytoplasm (GO:0005737);; Cellular Component: plasma membrane (GO:0005886);; Molecular Function: zinc ion binding (GO:0008270);; Biological Process: negative regulation of G2/M transition of mitotic cell cycle (GO:0010972);; Biological Process: negative regulation…	K14365|0|gga:770787|K14365 four and a half LIM domains protein 1 | (RefSeq) FHL1; four and a half LIM domains 1	--	[TZR]	Signal transduction mechanisms;; Cytoskeleton;; General function prediction only	LIM domain	PDZ and LIM domain protein 7 GN=pdlim7 OS=Danio rerio (Zebrafish) PE=2 SV=1	T	Signal transduction mechanisms	PREDICTED: four and a half LIM domains protein 1 isoform X2 [Gallus gallus]
gene7696	492	265	452	324	923	65	61	61	38	62	1.14736	0.570948	0.961617	0.600704	2.13523	0.176073	0.121368	0.137678	0.101685	0.141389	0.0069867	-2.63182	down	--	--	Molecular Function: calcium ion binding (GO:0005509);; Cellular Component: plasma membrane (GO:0005886);; Biological Process: homophilic cell adhesion via plasma membrane adhesion molecules (GO:0007156);; Cellular Component: integral component of membrane (GO:0016021);;	K16498|0|gga:422264|K16498 protocadherin delta 1 | (RefSeq) PCDH11X, cadherin; protocadherin 11 X-linked	--	--	--	Cadherin domain;; Protocadherin;; Cadherin-like;; Eukaryotic family of unknown function (DUF1754)	Protocadherin-15 (Precursor) GN=Pcdh15 OS=Gallus gallus (Chicken) PE=1 SV=1	S	Function unknown	PREDICTED: protocadherin-11 X-linked-like isoform X6 [Gallus gallus]
gene7802	2975	2152	3097	2231	3564	909	1404	849	531	1371	11.6109	7.63797	10.8732	6.83123	13.5237	4.18265	4.74258	3.29428	2.43889	5.30211	0.00729264	-1.02255	down	[GEPR]	Carbohydrate transport and metabolism;; Amino acid transport and metabolism;; Inorganic ion transport and metabolism;; General function prediction only	--	K08231|0|gga:428716|K08231 MFS transporter, MCP family, solute carrier family 16 (monocarboxylic acid transporters), member 2 | (RefSeq) SLC16A2; solute carrier family 16 member 2	--	[G]	Carbohydrate transport and metabolism	Major Facilitator Superfamily	Monocarboxylate transporter 10 GN=slc16a10 OS=Danio rerio (Zebrafish) PE=2 SV=1	P	Inorganic ion transport and metabolism	PREDICTED: monocarboxylate transporter 8 [Gallus gallus]
gene7827	842	1361	1183	969	1105	121	193	317	130	249	3.62936	5.3576	4.60016	3.36551	4.66395	0.611929	0.721129	1.33946	0.650001	1.06511	1.45655e-07	-1.95797	down	--	--	Cellular Component: extracellular region (GO:0005576);; Biological Process: compound eye development (GO:0048749);;	--	--	--	--	von Willebrand factor type C domain	Chordin-like protein 1 (Precursor) GN=CHRDL1 OS=Gallus gallus (Chicken) PE=2 SV=1	R	General function prediction only	chordin-like protein 1 precursor [Gallus gallus]
gene8040	734	302	1684	919	1776	64	90	135	59	94	14.9948	5.19498	31.1275	14.6251	35.5675	1.42925	1.4326	2.55842	1.29311	1.76843	0.00221079	-3.13452	down	--	--	--	--	--	--	--	Mitochondria Localisation Sequence	--	U	Intracellular trafficking, secretion, and vesicular transport	PREDICTED: protein MGARP isoform X2 [Gallus gallus]
gene8061	1603	1596	3315	2881	2879	330	436	1065	665	1674	28.5137	27.9669	51.5341	43.042	35.3526	4.6564	5.57338	17.4295	13.4059	28.836	0.045497	-1.08695	down	--	--	Biological Process: NK T cell proliferation (GO:0001866);; Molecular Function: cytokine activity (GO:0005125);; Molecular Function: cytokine receptor binding (GO:0005126);; Cellular Component: extracellular space (GO:0005615);; Cellular Component: cytoplasm (GO:0005737);; Biological Process: positive regulation of interleukin-17 production (GO:0032740);; Biological Process: positive regulation of…	K05433|1.5827e-109|gga:395258|K05433 interleukin 15 | (RefSeq) IL15, interleukin-15; interleukin 15	Cytokine-cytokine receptor interaction (ko04060);; Intestinal immune network for IgA production (ko04672);; Herpes simplex infection (ko05168)	--	--	Interleukin 15	--	S	Function unknown	interleukin 15 precursor [Gallus gallus]
gene8185	975	1114	898	1761	548	63	56	81	41	81	3.19468	4.59259	3.40721	5.50433	2.41949	0.189811	0.12497	0.647226	0.241107	0.206325	4.15456e-12	-3.51402	down	--	--	Cellular Component: extracellular region (GO:0005576);; Biological Process: multicellular organism development (GO:0007275);; Biological Process: negative regulation of Wnt signaling pathway (GO:0030178);;	K02165|1.34802e-153|gga:422531|K02165 dickkopf | (RefSeq) DKK2, null; dickkopf WNT signaling pathway inhibitor 2	Wnt signaling pathway (ko04310)	[T]	Signal transduction mechanisms	Dickkopf N-terminal cysteine-rich region	--	T	Signal transduction mechanisms	PREDICTED: dickkopf-related protein 2 isoform X3 [Gallus gallus]
gene830	29464	59072	29656	30833	25516	14	24	16	45	29	311.168	569.857	278.932	254.45	264.018	0.316921	0.190095	0.762474	1.16198	1.03477	5.14776e-36	-9.87331	down	--	--	Molecular Function: calcium ion binding (GO:0005509);; Cellular Component: cytoplasm (GO:0005737);; Cellular Component: axon (GO:0030424);;	--	--	[T]	Signal transduction mechanisms	EF hand;; EF-hand domain;; EF hand;; EF-hand domain pair;; EF-hand domain pair	Parvalbumin, muscle OS=Gallus gallus (Chicken) PE=1 SV=1	T	Signal transduction mechanisms	PREDICTED: parvalbumin alpha isoform X1 [Meleagris gallopavo]
gene8406	880	759	501	683	528	225	329	157	171	210	2.77106	1.89664	1.37503	1.76071	1.62638	0.725093	0.92253	0.424384	0.542544	0.562007	0.0192759	-1.13077	down	[RTKL]	General function prediction only;; Signal transduction mechanisms;; Transcription;; Replication, recombination and repair	Molecular Function: GPI-linked ephrin receptor activity (GO:0005004);; Molecular Function: ATP binding (GO:0005524);; Cellular Component: integral component of plasma membrane (GO:0005887);; Biological Process: axon guidance (GO:0007411);; Biological Process: hippocampus development (GO:0021766);; Cellular Component: axon (GO:0030424);; Cellular Component: dendrite (GO:0030425);; Biological Proce…	K05106|0|gga:395997|K05106 Eph receptor A5 [EC:2.7.10.1] | (RefSeq) EPHA5, CEK7; EPH receptor A5	--	[T]	Signal transduction mechanisms	Protein tyrosine kinase;; Ephrin receptor ligand binding domain;; Protein kinase domain;; Fibronectin type III domain;; Ephrin type-A receptor 2 transmembrane domain;; SAM domain (Sterile alpha motif);; SAM domain (Sterile alpha motif)	Ephrin type-A receptor 5 (Precursor) GN=EPHA5 OS=Gallus gallus (Chicken) PE=2 SV=1	T	Signal transduction mechanisms	PREDICTED: ephrin type-A receptor 5 isoform X1 [Corvus cornix cornix]
gene8461	9192	2060	4231	4221	19830	108	132	20	113	229	165.215	33.77	68.4547	59.9982	348.218	2.27439	2.03123	0.341684	2.37654	4.08432	0.00779067	-5.63072	down	--	--	Molecular Function: actin binding (GO:0003779);; Cellular Component: actin cytoskeleton (GO:0015629);; Cellular Component: Z disc (GO:0030018);; Molecular Function: telethonin binding (GO:0031433);;	--	--	--	--	Calcineurin-binding protein (Calsarcin)	--	R	General function prediction only	myozenin-2 [Gallus gallus]
gene8492	593	940	1639	1408	1712	139	216	98	92	397	7.11446	10.2007	17.613	13.2966	20.0079	1.98453	2.25359	1.18089	1.30301	4.7488	6.48152e-05	-2.30031	down	--	--	Biological Process: negative regulation of transcription from RNA polymerase II promoter (GO:0000122);; Molecular Function: transcription regulatory region sequence-specific DNA binding (GO:0000976);; Molecular Function: transcriptional repressor activity, RNA polymerase II core promoter proximal region sequence-specific binding (GO:0001078);; Molecular Function: RNA polymerase II activating tran…	K04686|6.51568e-180|gga:395862|K04686 paired-like homeodomain transcription factor 2 | (RefSeq) PITX2, Ptx2, null; paired like homeodomain 2	TGF-beta signaling pathway (ko04350)	[K]	Transcription	Homeobox domain;; OAR domain	Pituitary homeobox 2 GN=PITX2 OS=Gallus gallus (Chicken) PE=2 SV=1	K	Transcription	PREDICTED: pituitary homeobox 2 isoform X1 [Meleagris gallopavo]
gene8507	817	422	534	809	820	45	65	72	39	25	1.89913	0.899732	1.18841	1.47872	1.87312	0.113929	0.120116	0.154502	0.098431	0.052494	6.70628e-13	-3.28301	down	--	--	Molecular Function: netrin receptor activity (GO:0005042);; Cellular Component: plasma membrane (GO:0005886);; Biological Process: signal transduction (GO:0007165);; Biological Process: brain development (GO:0007420);; Cellular Component: integral component of membrane (GO:0016021);; Biological Process: regulation of cell migration (GO:0030334);; Biological Process: anterior/posterior axon guidan…	K07521|0|fab:101818378|K07521 netrin receptor unc-5 | (RefSeq) UNC5C; unc-5 netrin receptor C	--	[T]	Signal transduction mechanisms	ZU5 domain;; Death domain;; Immunoglobulin I-set domain;; Thrombospondin type 1 domain;; Immunoglobulin domain	Netrin receptor UNC5C (Precursor) GN=UNC5C OS=Gallus gallus (Chicken) PE=2 SV=1	T	Signal transduction mechanisms	PREDICTED: netrin receptor UNC5C isoform X2 [Zonotrichia albicollis]
gene855	3642	5305	3660	2733	1676	981	1138	900	568	804	84.2591	111.884	76.2199	49.9907	37.8701	26.7561	22.7906	20.7016	15.4704	18.4327	0.00693125	-1.45191	down	--	--	Cellular Component: basement membrane (GO:0005604);; Molecular Function: metalloendopeptidase inhibitor activity (GO:0008191);; Molecular Function: metal ion binding (GO:0046872);; Biological Process: negative regulation of membrane protein ectodomain proteolysis (GO:0051045);; Biological Process: cellular response to organic substance (GO:0071310);;	K16866|2.13164e-159|mgp:100539796|K16866 metalloproteinase inhibitor 3 | (RefSeq) TIMP3; TIMP metallopeptidase inhibitor 3	--	[R]	General function prediction only	Tissue inhibitor of metalloproteinase	Metalloproteinase inhibitor 3 (Precursor) GN=TIMP3 OS=Gallus gallus (Chicken) PE=1 SV=2	R	General function prediction only	metalloproteinase inhibitor 3 precursor [Gallus gallus]
gene8552	62497	87390	84987	75750	61603	17324	15187	20621	14977	36698	449.047	573.478	548.595	431.762	431.852	144.16	94.4158	144.312	120.494	257.419	0.000217767	-1.34492	down	--	--	--	--	--	[TZ]	Signal transduction mechanisms;; Cytoskeleton	PDZ domain (Also known as DHR or GLGF);; LIM domain	PDZ and LIM domain protein 3 GN=pdlim3 OS=Xenopus laevis (African clawed frog) PE=2 SV=1	TZ	Signal transduction mechanisms;; Cytoskeleton	PREDICTED: PDZ and LIM domain protein 3 isoform X1 [Meleagris gallopavo]
gene8585	1611	1954	1409	2346	1057	366	526	608	682	677	18.829	20.9051	14.8674	21.7378	12.0929	5.03727	5.31824	7.03618	9.41232	7.86955	0.00184679	-1.02099	down	--	--	--	--	--	[T]	Signal transduction mechanisms	Immunoglobulin I-set domain;; Immunoglobulin domain;; Immunoglobulin domain;; Immunoglobulin domain	Vascular endothelial growth factor receptor 2 (Precursor) OS=Danio rerio (Zebrafish) PE=1 SV=2	T	Signal transduction mechanisms	PREDICTED: platelet-derived growth factor receptor-like isoform X3 [Gallus gallus]
gene8806	498	686	729	588	579	97	211	174	57	223	3.03124	3.76568	4.14834	2.82535	3.44563	0.729845	1.05086	1.04665	0.385019	1.40973	0.00147588	-1.57154	down	[F]	Nucleotide transport and metabolism	Cellular Component: cytoplasm (GO:0005737);; Biological Process: pyrimidine nucleobase catabolic process (GO:0006208);; Molecular Function: hydrolase activity, acting on carbon-nitrogen (but not peptide) bonds, in cyclic amides (GO:0016812);; Cellular Component: dendrite (GO:0030425);; Cellular Component: neuronal cell body (GO:0043025);; Cellular Component: intracellular membrane-bounded organel…	--	--	[F]	Nucleotide transport and metabolism	Amidohydrolase family;; Amidohydrolase;; Amidohydrolase	Dihydropyrimidinase-related protein 2 GN=DPYSL2 OS=Gallus gallus (Chicken) PE=2 SV=1	F	Nucleotide transport and metabolism	collapsin response mediator protein-1A [Gallus gallus]
gene8826	1043	1873	1036	1403	662	213	239	412	236	796	8.49249	13.2235	7.41297	8.66809	4.85839	2.04259	1.62856	3.0814	2.09737	6.52704	0.0430227	-1.20305	down	[O]	Posttranslational modification, protein turnover, chaperones	Biological Process: regulation of cell growth (GO:0001558);; Molecular Function: serine-type endopeptidase activity (GO:0004252);; Molecular Function: insulin-like growth factor binding (GO:0005520);; Cellular Component: extracellular region (GO:0005576);; Biological Process: proteolysis (GO:0006508);;	K08785|0|gga:422868|K08785 HtrA serine peptidase 3 [EC:3.4.21.-] | (RefSeq) HTRA3; HtrA serine peptidase 3	--	--	--	Trypsin-like peptidase domain;; Trypsin;; PDZ domain;; PDZ domain (Also known as DHR or GLGF);; Kazal-type serine protease inhibitor domain;; Kazal-type serine protease inhibitor domain;; Peptidase S46	Serine protease HTRA1A (Precursor) GN=htra1a OS=Danio rerio (Zebrafish) PE=2 SV=1	W	Extracellular structures	PREDICTED: serine protease HTRA3 isoform 2 [Gallus gallus]
gene886	511	888	491	708	346	165	128	210	164	326	5.6218	8.91278	4.86273	6.16368	3.71489	2.1351	1.22094	2.29275	2.11813	3.55931	0.0393825	-1.06363	down	--	--	Molecular Function: transferase activity, transferring glycosyl groups (GO:0016757);;	--	--	--	--	Glycosyl transferase family 8	Glycosyltransferase 8 domain-containing protein 1 GN=glt8d1 OS=Danio rerio (Zebrafish) PE=2 SV=1	G	Carbohydrate transport and metabolism	glycosyltransferase 8 domain-containing protein 2 precursor [Gallus gallus]
gene8898	4389	3023	3931	4320	5794	1032	784	1254	1721	2114	20.1015	12.4748	16.0642	15.5965	26.3361	5.89194	3.14769	6.84672	9.69748	10.0798	0.00563544	-1.13352	down	--	--	Molecular Function: protein dimerization activity (GO:0046983);; Biological Process: regulation of neural retina development (GO:0061074);; Biological Process: regulation of skeletal muscle cell differentiation (GO:2001014);;	K09084|2.21258e-87|gga:771738|K09084 atonal protein 8 | (RefSeq) ATOH8, null; atonal bHLH transcription factor 8	--	[K]	Transcription	Helix-loop-helix DNA-binding domain	Neurogenic differentiation factor 1 OS=Danio rerio (Zebrafish) PE=1 SV=1	K	Transcription	protein atonal homolog 8 [Gallus gallus]
gene9069	308	499	430	706	521	108	142	104	106	154	5.73716	7.92427	7.08789	9.03343	8.1093	2.03927	2.16168	2.38844	2.25843	2.93475	0.00404716	-1.49396	down	--	--	--	--	--	--	--	Cell division protein anillin	Rhotekin-2 GN=rtkn2 OS=Xenopus laevis (African clawed frog) PE=2 SV=1	T	Signal transduction mechanisms	PREDICTED: rhotekin [Chrysemys picta bellii]
gene9083	2191	3116	3150	2856	1551	510	591	827	470	1866	11.88	12.1642	12.4155	9.58205	9.091	3.26207	2.87831	4.58599	3.32926	9.63133	0.00895898	-1.13611	down	--	--	--	K08638|0|amj:102572084|K08638 carboxypeptidase X1 [EC:3.4.17.-] | (RefSeq) CPXM1; probable carboxypeptidase X1	--	[R]	General function prediction only	Zinc carboxypeptidase;; F5/8 type C domain;; Carboxypeptidase regulatory-like domain	Carboxypeptidase E (Precursor) GN=cpe OS=Lophius americanus (American goosefish) PE=2 SV=1	R	General function prediction only	PREDICTED: probable carboxypeptidase X1, partial [Haliaeetus leucocephalus]
gene909	61540	26405	46221	75914	137436	89	323	60	152	461	290.596	113.643	196.458	283.476	634.326	0.468009	1.26803	0.265495	0.802957	2.07386	5.73813e-09	-7.93364	down	--	--	--	K12557|0|gga:418099|K12557 myosin-binding protein C, slow-type | (RefSeq) MYBPC1; myosin binding protein C, slow type	--	--	--	Immunoglobulin I-set domain;; Immunoglobulin domain;; Fibronectin type III domain;; Immunoglobulin domain;; Immunoglobulin V-set domain;; Immunoglobulin domain;; CD80-like C2-set immunoglobulin domain;; Immunoglobulin C1-set domain	Myosin-binding protein C, cardiac-type GN=MYBPC3 OS=Gallus gallus (Chicken) PE=1 SV=3	Z	Cytoskeleton	PREDICTED: myosin-binding protein C, slow-type isoform X2 [Gallus gallus]
gene9326	924	742	944	713	763	192	197	221	230	463	2.9861	2.94403	3.6008	1.71068	2.35589	0.920695	0.543788	0.966931	1.21209	1.87292	0.0088122	-1.17667	down	[G]	Carbohydrate transport and metabolism	Molecular Function: hydrolase activity, hydrolyzing O-glycosyl compounds (GO:0004553);; Biological Process: carbohydrate metabolic process (GO:0005975);;	--	--	[G]	Carbohydrate transport and metabolism	Glycosyl hydrolases family 31	SITS-binding protein OS=Torpedo californica (Pacific electric ray) PE=1 SV=2	G	Carbohydrate transport and metabolism	PREDICTED: SITS-binding protein-like isoform X6 [Gallus gallus]
gene9327	973	570	1419	1164	2021	272	430	244	325	360	9.52363	5.2579	12.4772	8.60918	18.3548	3.17238	3.35628	2.42797	3.49425	3.19238	0.0396662	-1.42851	down	[R]	General function prediction only	Molecular Function: GTPase activity (GO:0003924);; Molecular Function: GTP binding (GO:0005525);; Biological Process: small GTPase mediated signal transduction (GO:0007264);; Cellular Component: membrane (GO:0016020);;	--	--	[R]	General function prediction only	Ras family;; Miro-like protein	Ras-like protein family member 11B OS=Danio rerio (Zebrafish) PE=2 SV=1	R	General function prediction only	PREDICTED: ras-related and estrogen-regulated growth inhibitor-like [Gallus gallus]
gene9406	2261	2275	1191	3449	1561	150	373	302	337	597	7.68876	7.04586	3.64677	9.26762	5.17966	0.597242	1.09532	1.02407	1.44709	2.03405	7.39331e-06	-2.12909	down	--	--	Cellular Component: proteinaceous extracellular matrix (GO:0005578);; Biological Process: cell adhesion (GO:0007155);;	--	--	[W]	Extracellular structures	Thrombospondin type 1 domain;; Spondin_N	Spondin-1 (Precursor) GN=SPON1 OS=Gallus gallus (Chicken) PE=2 SV=1	W	Extracellular structures	PREDICTED: spondin-1 [Charadrius vociferus]
gene9419	1179	1584	1432	1368	730	295	335	477	291	543	4.67925	5.72961	5.11487	4.2966	2.83165	1.37786	1.15034	1.88156	1.35766	2.13678	0.00103608	-1.19777	down	--	--	--	--	--	[W]	Extracellular structures	Olfactomedin-like domain	Olfactomedin-like protein 3A (Precursor) GN=olfml3a OS=Danio rerio (Zebrafish) PE=2 SV=2	W	Extracellular structures	PREDICTED: olfactomedin-like 1 [Gallus gallus]
gene9474	723	1157	861	826	614	311	313	302	99	440	4.59759	6.59906	4.90514	4.07348	3.58484	2.19733	1.95514	1.92623	0.594394	2.52989	0.0245195	-1.042	down	--	--	--	--	--	[R]	General function prediction only	Tub family	--	R	General function prediction only	PREDICTED: tubby protein isoform X3 [Zonotrichia albicollis]
gene954	7547	9628	7088	11341	5446	2078	2125	1792	1616	3073	40.3086	46.8708	34.0715	47.8917	28.4192	13.0827	9.82308	9.51735	10.1746	16.2723	1.01083e-06	-1.43505	down	[R]	General function prediction only	Cellular Component: nucleus (GO:0005634);; Cellular Component: cytosol (GO:0005829);; Cellular Component: F-actin capping protein complex (GO:0008290);; Biological Process: positive regulation of macromolecule biosynthetic process (GO:0010557);; Biological Process: positive regulation of cardiac muscle hypertrophy (GO:0010613);; Biological Process: positive regulation of cell growth (GO:0030307);…	--	--	[K]	Transcription	Ankyrin repeats (3 copies);; Ankyrin repeat;; Ankyrin repeats (many copies);; Ankyrin repeats (many copies);; Ankyrin repeat	Myotrophin GN=MTPN OS=Gallus gallus (Chicken) PE=3 SV=1	K	Transcription	myotrophin [Gallus gallus]
gene9599	4556	7231	5876	9297	10391	2169	2155	1816	1717	2907	50.2543	89.9509	69.9787	77.1155	150.895	32.1655	21.34	22.4146	22.9421	31.8482	0.00194525	-1.29717	down	[R]	General function prediction only	Cellular Component: Golgi membrane (GO:0000139);; Molecular Function: GTPase activity (GO:0003924);; Molecular Function: GTP binding (GO:0005525);; Cellular Component: plasma membrane (GO:0005886);; Biological Process: endocytosis (GO:0006897);; Biological Process: apoptotic process (GO:0006917);; Biological Process: cell cycle arrest (GO:0007050);; Biological Process: mitotic cell cycle checkpoi…	K02833|1.93783e-128|gga:396229|K02833 GTPase HRas | (RefSeq) HRAS, H-RAS, HRAS1; HRas proto-oncogene, GTPase	MAPK signaling pathway (ko04010);; ErbB signaling pathway (ko04012);; FoxO signaling pathway (ko04068);; Endocytosis (ko04144);; mTOR signaling pathway (ko04150);; Apoptosis (ko04210);; VEGF signaling pathway (ko04370);; Focal adhesion (ko04510);; Tight junction (ko04530);; Gap junction (ko04540);; Regulation of actin cytoskeleton (ko04810);; Insulin signaling pathway (ko04910);; GnRH signaling p…	[R]	General function prediction only	Ras family;; Miro-like protein;; ADP-ribosylation factor family;; Elongation factor Tu GTP binding domain;; 50S ribosome-binding GTPase	GTPase HRas (Precursor) GN=HRAS OS=Gallus gallus (Chicken) PE=1 SV=1	T	Signal transduction mechanisms	GTPase HRas precursor [Gallus gallus]
gene9602	4522	6052	5649	7204	5333	229	1486	1656	1704	1526	66.5212	80.6056	74.953	84.3488	77.8563	3.8999	19.0944	24.2368	29.5269	23.1483	5.23147e-09	-1.61864	down	[R]	General function prediction only	Cellular Component: Golgi membrane (GO:0000139);; Molecular Function: GTPase activity (GO:0003924);; Molecular Function: GTP binding (GO:0005525);; Cellular Component: plasma membrane (GO:0005886);; Biological Process: endocytosis (GO:0006897);; Biological Process: apoptotic process (GO:0006917);; Biological Process: cell cycle arrest (GO:0007050);; Biological Process: mitotic cell cycle checkpoi…	K02833|4.25503e-108|gga:396229|K02833 GTPase HRas | (RefSeq) HRAS, H-RAS, HRAS1; HRas proto-oncogene, GTPase	MAPK signaling pathway (ko04010);; ErbB signaling pathway (ko04012);; FoxO signaling pathway (ko04068);; Endocytosis (ko04144);; mTOR signaling pathway (ko04150);; Apoptosis (ko04210);; VEGF signaling pathway (ko04370);; Focal adhesion (ko04510);; Tight junction (ko04530);; Gap junction (ko04540);; Regulation of actin cytoskeleton (ko04810);; Insulin signaling pathway (ko04910);; GnRH signaling p…	[R]	General function prediction only	Ras family;; Miro-like protein;; Elongation factor Tu GTP binding domain;; ADP-ribosylation factor family	GTPase HRas (Precursor) GN=HRAS OS=Gallus gallus (Chicken) PE=1 SV=1	T	Signal transduction mechanisms	PREDICTED: GTPase HRas-like [Pterocles gutturalis]
gene9654	1139	1190	2071	1886	2524	115	85	175	172	216	13.3219	17.5679	21.1536	17.1811	28.9383	1.63199	0.998093	2.79461	2.19056	2.27597	6.73301e-09	-3.01497	down	[Z]	Cytoskeleton	--	--	--	[R]	General function prediction only	Calponin homology (CH) domain;; CAMSAP CH domain	Cytospin-A GN=specc1l OS=Xenopus tropicalis (Western clawed frog) PE=2 SV=1	Z	Cytoskeleton	PREDICTED: smoothelin-like protein 1 [Gallus gallus]
gene9656	1529	2982	4008	3031	4757	84	162	212	198	504	17.9128	30.5223	41.5306	26.4081	54.0403	0.717341	1.40565	2.30274	2.50245	5.2359	7.64548e-08	-3.36692	down	--	--	--	K16661|0|gga:425201|K16661 reticulon-4 receptor-like 2 | (RefSeq) RTN4RL2; reticulon 4 receptor-like 2	--	[R]	General function prediction only	Leucine rich repeat;; Leucine Rich repeats (2 copies);; Leucine Rich Repeat;; Leucine rich repeats (6 copies);; Leucine rich repeat	Leucine-rich repeat and immunoglobulin-like domain-containing nogo receptor-interacting protein 1 (Precursor) GN=lingo1 OS=Xenopus tropicalis (Western clawed frog) PE=2 SV=1	T	Signal transduction mechanisms	PREDICTED: reticulon 4 receptor-like 2, partial [Gallus gallus]
gene9657	289	803	747	629	711	133	232	175	85	379	2.88983	7.48855	6.23082	3.95181	6.84068	1.74755	2.25232	1.71596	0.86358	3.92722	0.0189529	-1.22078	down	--	--	--	K08230|0|gga:423133|K08230 MFS transporter, LAT3 family, solute carrier family 43, member 3 | (RefSeq) SLC43A3; solute carrier family 43 member 3	--	--	--	--	Large neutral amino acids transporter small subunit 4 GN=slc43a2 OS=Xenopus tropicalis (Western clawed frog) PE=2 SV=1	P	Inorganic ion transport and metabolism	PREDICTED: solute carrier family 43 member 3 isoform X3 [Gallus gallus]
gene9663	271	481	924	636	870	33	61	38	50	49	1.80101	2.79942	3.55324	5.9605	5.69019	0.177676	0.241984	0.249444	0.554436	0.520309	7.89265e-07	-3.27501	down	--	--	--	K11515|0|gga:423138|K11515 inner centromere protein | (RefSeq) INCENPL; inner centromere protein antigens 135/155kDa-like	--	[D]	Cell cycle control, cell division, chromosome partitioning	Inner centromere protein, ARK binding region;; Chromosome passenger complex (CPC) protein INCENP N terminal	Inner centromere protein GN=INCENP OS=Gallus gallus (Chicken) PE=2 SV=1	D	Cell cycle control, cell division, chromosome partitioning	PREDICTED: inner centromere protein-like isoform X7 [Gallus gallus]
gene9707	406	867	411	425	1222	109	91	65	84	142	0.793455	1.63308	0.719434	0.699089	2.48656	0.259128	0.161583	0.133728	0.199946	0.249668	0.0204996	-2.29274	down	[C]	Energy production and conversion	--	K05613|0|fpg:101911244|K05613 solute carrier family 1 (glial high affinity glutamate transporter), member 2 | (RefSeq) SLC1A2; solute carrier family 1 member 2	--	[E]	Amino acid transport and metabolism	Sodium:dicarboxylate symporter family	Excitatory amino acid transporter 1 GN=SLC1A3 OS=Ambystoma tigrinum (Eastern tiger salamander) PE=2 SV=1	E	Amino acid transport and metabolism	PREDICTED: excitatory amino acid transporter 2 [Phalacrocorax carbo]
gene9711	528	653	472	447	302	59	124	91	69	206	3.68431	4.1595	2.96404	2.47937	2.06218	0.485482	0.743536	0.628741	0.567473	1.4339	0.00181739	-1.68843	down	--	--	--	--	--	[E]	Amino acid transport and metabolism	Trypsin;; Sushi domain (SCR repeat);; CUB domain;; EGF-like domain	Inactive serine protease PAMR1 (Precursor) GN=pamr1 OS=Xenopus tropicalis (Western clawed frog) PE=2 SV=1	O	Posttranslational modification, protein turnover, chaperones	PREDICTED: inactive serine protease PAMR1 [Gallus gallus]
gene9741	1604	1501	1795	1030	1686	483	643	477	364	281	7.96765	7.14456	8.79747	4.19239	8.6717	3.12633	3.0788	2.53096	2.40957	1.64352	0.000144053	-1.26091	down	--	--	Cellular Component: integral component of membrane (GO:0016021);;	K17353|1.2486e-135|gga:395586|K17353 tetraspanin-18 | (RefSeq) TSPAN18, tetraspanin-18; tetraspanin 18	--	[R]	General function prediction only	Tetraspanin family	Tetraspanin-9 OS=Danio rerio (Zebrafish) PE=2 SV=1	R	General function prediction only	tetraspanin-18 [Gallus gallus]
gene9744	4666	2459	5052	4186	4736	909	1198	947	722	1253	9.31415	4.36386	9.60613	6.76155	9.06772	2.0954	2.12217	1.91519	2.07192	2.52021	1.17221e-06	-1.58989	down	--	--	--	--	--	--	--	--	Histone-lysine N-methyltransferase PRDM9 GN=prdm9 OS=Danio rerio (Zebrafish) PE=2 SV=1	S	Function unknown	PREDICTED: zinc finger protein 862 isoform X11 [Gallus gallus]
gene9811	526	135	1092	328	764	61	48	47	99	27	5.51535	1.27486	10.3228	2.69685	7.80871	0.737904	0.425705	0.464051	1.20304	0.264383	0.00979484	-2.75764	down	--	--	--	K07232|5.0656e-164|gga:423209|K07232 cation transport protein ChaC | (RefSeq) CHAC1; ChaC glutathione specific gamma-glutamylcyclotransferase 1	--	[P]	Inorganic ion transport and metabolism	ChaC-like protein	Glutathione-specific gamma-glutamylcyclotransferase 1 {ECO:0000250|UniProtKB:Q9BUX1} OS=Danio rerio (Zebrafish) PE=3 SV=1	P	Inorganic ion transport and metabolism	cation transport regulator-like protein 1 [Gallus gallus]
gene9888	1085	1593	1336	1525	1159	340	492	346	276	337	2.09922	2.39929	2.11404	2.08632	2.1843	0.766237	0.694526	0.553957	0.528646	0.630326	4.99553e-05	-1.39663	down	--	--	Molecular Function: calcium:sodium antiporter activity (GO:0005432);; Biological Process: calcium ion transport (GO:0006816);; Biological Process: cell communication (GO:0007154);; Cellular Component: integral component of membrane (GO:0016021);; Biological Process: transmembrane transport (GO:0055085);;	K05849|0|mgp:100541915|K05849 solute carrier family 8 (sodium/calcium exchanger) | (RefSeq) SLC8A3; solute carrier family 8 member A3	Calcium signaling pathway (ko04020)	[PT]	Inorganic ion transport and metabolism;; Signal transduction mechanisms	Calx-beta domain;; Sodium/calcium exchanger protein	--	PT	Inorganic ion transport and metabolism;; Signal transduction mechanisms	PREDICTED: sodium/calcium exchanger 3 isoformX2 [Gallus gallus]
gene992	1574	701	1740	1854	1791	425	542	405	395	435	4.40448	1.78692	4.5129	4.10504	4.89953	1.40185	1.31219	1.12667	1.34893	1.23582	0.000602921	-1.29054	down	--	--	--	K09656|0|gga:418150|K09656 beta-1,4-N-acetylgalactosaminyltransferase 3 [EC:2.4.1.244] | (RefSeq) B4GALNT3; beta-1,4-N-acetyl-galactosaminyltransferase 3	--	--	--	PA14 domain;; Chondroitin N-acetylgalactosaminyltransferase;; N-terminal domain of galactosyltransferase	--	G	Carbohydrate transport and metabolism	PREDICTED: beta-1,4-N-acetylgalactosaminyltransferase 3 [Gallus gallus]

## Sheet: up（429）
#ID	PT1_Count	PT2_Count	PT3_Count	PT4_Count	PT5_Count	PX1_Count	PX2_Count	PX3_Count	PX4_Count	PX5_Count	PT1_FPKM	PT2_FPKM	PT3_FPKM	PT4_FPKM	PT5_FPKM	PX1_FPKM	PX2_FPKM	PX3_FPKM	PX4_FPKM	PX5_FPKM	FDR	log2FC	regulated	COG_class	COG_class_annotation	GO_annotation	KEGG_annotation	KEGG_pathway_annotation	KOG_class	KOG_class_annotation	Pfam_annotation	Swiss-Prot_annotation	eggNOG_class	eggNOG_class_annotation	NR_annotation
Gallus_gallus_newGene_10032	33	15	0	25	2	456	89	47	85	358	0.470458	0.238063	0	0.298841	0.015344	5.99115	1.53254	0.844739	1.64582	7.12946	0.0313426	4.30968	up	--	--	--	--	--	--	--	--	--	--	--	hypothetical protein Anapl_03540 [Anas platyrhynchos]
Gallus_gallus_newGene_10253	180	111	90	105	70	217	241	223	122	189	2.6069	2.50954	1.40984	1.99595	1.44433	3.52536	5.02721	3.84186	3.22685	3.38955	0.038109	1.32035	up	--	--	--	--	--	--	--	--	--	--	--	--
Gallus_gallus_newGene_11831	3	0	11	0	0	211	53	159	97	159	0.007616	0	0.034228	0	0	2.11397	0.565118	1.19949	0.969056	1.01482	1.94748e-10	6.1671	up	--	--	--	--	--	--	--	--	--	--	--	--
Gallus_gallus_newGene_11963	1241	553	2778	2084	1411	14180	21071	14802	7549	10785	6.83684	2.776	13.778	9.07693	7.59378	92.1342	100.546	81.1623	49.0488	58.9293	2.68195e-14	3.59935	up	[D]	Cell cycle control, cell division, chromosome partitioning	--	--	--	--	--	Transglutaminase-like superfamily	--	D	Cell cycle control, cell division, chromosome partitioning	PREDICTED: kyphoscoliosis peptidase isoform X1 [Meleagris gallopavo]
Gallus_gallus_newGene_12129	223	347	395	79	338	1262	1168	642	639	938	1.24953	1.34178	1.703	0.288845	1.48565	8.472	6.25357	4.10386	5.93744	8.16334	1.50978e-06	2.23753	up	--	--	--	--	--	--	--	--	--	--	--	--
Gallus_gallus_newGene_13164	0	39	19	11	3	63	328	391	402	101	0	0.719351	0.334448	0.165427	0.056064	1.52279	5.83784	7.99606	9.73961	2.05354	0.000273977	4.7318	up	--	--	--	--	--	--	--	--	--	--	--	--
Gallus_gallus_newGene_13254	227	118	127	178	286	489	481	414	294	512	1.19049	0.660879	0.648398	0.869317	1.53922	3.3176	3.09551	3.04159	2.13616	3.72353	0.000183369	1.69654	up	--	--	--	--	--	--	--	--	--	S	Function unknown	hypothetical protein N337_06011, partial [Phoenicopterus ruber ruber]
Gallus_gallus_newGene_14909	65	72	29	115	81	92	409	148	202	226	0.48924	0.491803	0.191315	0.685377	0.59283	0.820626	2.68142	1.11436	1.7956	1.69693	0.00258597	2.04356	up	--	--	--	--	--	--	--	--	--	--	--	--
Gallus_gallus_newGene_1536	30	129	120	3	16	1378	2650	2317	90	1319	0.056907	0.193172	0.447098	0.007553	0.025414	4.30485	4.87744	4.9986	0.376405	2.57337	4.04577e-06	5.15846	up	--	--	--	--	--	--	--	--	--	--	--	--
Gallus_gallus_newGene_15489	37	0	0	27	112	183	128	67	224	147	0.137253	0	0	0.080859	0.413779	0.817687	0.420234	0.251281	0.997788	0.551281	0.00344917	2.57141	up	--	--	Molecular Function: motor activity (GO:0003774);; Molecular Function: actin binding (GO:0003779);; Molecular Function: calmodulin binding (GO:0005516);; Molecular Function: ATP binding (GO:0005524);; Cellular Component: myofibril (GO:0030016);; Cellular Component: myosin filament (GO:0032982);;	K10352|1.798e-33|fab:107604013|K10352 myosin heavy chain | (RefSeq) myosin-3-like	Tight junction (ko04530)	[Z]	Cytoskeleton	--	Myosin heavy chain, skeletal muscle, adult OS=Gallus gallus OX=9031 PE=1 SV=4	Z	Cytoskeleton	hypothetical protein CIB84_010615 [Bambusicola thoracicus]
Gallus_gallus_newGene_15819	3660	3247	4130	3038	3258	7745	10644	7417	4730	4198	6.2262	5.0312	6.3114	4.08445	5.41022	15.496	15.6447	12.5305	9.46763	7.06125	0.000552524	1.50576	up	--	--	--	--	--	--	--	Zinc finger, ZZ type;; Anaphase-promoting complex, subunit 10 (APC10)	--	S	Function unknown	PREDICTED: zinc finger ZZ-type and EF-hand domain-containing protein 1 isoform X2 [Coturnix japonica]
Gallus_gallus_newGene_16269	18	13	0	0	0	253	176	339	126	50	0.051803	0.033378	0	0	0	0.89262	0.457503	1.01059	0.443344	0.147165	1.63677e-06	5.40495	up	--	--	--	--	--	--	--	--	--	--	--	--
Gallus_gallus_newGene_16404	10040	5579	12263	7746	11437	14307	19628	15252	10163	8698	12.7084	6.54958	13.955	7.58783	14.1505	21.4253	21.6988	18.6781	15.378	10.6126	0.0105042	1.02998	up	--	--	Molecular Function: ubiquitin-protein transferase activity (GO:0004842);; Cellular Component: nucleoplasm (GO:0005654);; Cellular Component: cytoplasm (GO:0005737);; Cellular Component: centrosome (GO:0005813);; Molecular Function: zinc ion binding (GO:0008270);; Cellular Component: membrane (GO:0016020);; Biological Process: protein ubiquitination involved in ubiquitin-dependent protein cataboli…	K10691|0|cjo:107323414|K10691 E3 ubiquitin-protein ligase UBR4 [EC:2.3.2.27] | (RefSeq) UBR4; ubiquitin protein ligase E3 component n-recognin 4	--	[T]	Signal transduction mechanisms	E3 ubiquitin-protein ligase UBR4;; Putative zinc finger in N-recognin (UBR box)	--	O	Posttranslational modification, protein turnover, chaperones	PREDICTED: E3 ubiquitin-protein ligase UBR4 isoform X4 [Coturnix japonica]
Gallus_gallus_newGene_16693	160	90	195	116	111	326	260	300	219	237	0.982911	0.719098	0.988279	0.785661	0.746344	1.91209	1.53727	1.37639	1.62186	1.45427	0.00855529	1.52128	up	--	--	--	--	--	--	--	--	--	--	--	--
Gallus_gallus_newGene_18494	86	101	122	102	89	199	239	219	165	178	0.365524	0.47519	0.793621	0.683494	0.516982	1.35375	1.10868	0.902921	1.18177	0.734948	0.0163637	1.51626	up	--	--	Molecular Function: RNA binding (GO:0003723);; Molecular Function: RNA-directed DNA polymerase activity (GO:0003964);; Biological Process: RNA-dependent DNA biosynthetic process (GO:0006278);; Molecular Function: kinase activity (GO:0016301);; Biological Process: phosphorylation (GO:0016310);;	--	--	--	--	--	--	S	Function unknown	PREDICTED: LOW QUALITY PROTEIN: uncharacterized protein LOC109365375 [Meleagris gallopavo]
Gallus_gallus_newGene_19486	0	0	0	0	0	339	400	285	226	214	0	0	0	0	0	0.985133	0.853254	0.69813	0.657836	0.523394	8.40105e-39	Inf	up	--	--	--	--	--	--	--	--	--	--	--	PREDICTED: uncharacterized protein LOC104914309 isoform X2 [Meleagris gallopavo]
Gallus_gallus_newGene_19713	77	39	44	121	86	241	819	234	173	178	0.093264	0.043234	0.047856	0.116166	0.102361	0.34749	0.866835	0.284278	0.249257	0.215388	0.0348334	2.62686	up	--	--	--	--	--	--	--	--	--	S	Function unknown	PREDICTED: LOW QUALITY PROTEIN: RNA-directed DNA polymerase from mobile element jockey-like, partial [Struthio camelus australis]
Gallus_gallus_newGene_1992	198	198	379	142	246	297	790	414	504	461	0.460995	0.273816	0.751457	0.320428	0.772347	0.665503	1.2497	0.616628	1.08012	0.794893	0.000341704	1.56776	up	--	--	--	--	--	--	--	--	--	S	Function unknown	reverse transcriptase, partial [Gallus gallus]
Gallus_gallus_newGene_20049	10865	12710	12132	13585	9488	22006	32389	33674	25293	26989	315.871	336.791	317.452	312.245	269.488	754.248	815.266	973.964	866.954	777.887	7.64548e-08	1.7683	up	[G]	Carbohydrate transport and metabolism	Molecular Function: triose-phosphate isomerase activity (GO:0004807);; Cellular Component: extracellular space (GO:0005615);; Cellular Component: nucleus (GO:0005634);; Cellular Component: cytosol (GO:0005829);; Biological Process: gluconeogenesis (GO:0006094);; Biological Process: glycolytic process (GO:0006096);; Biological Process: pentose-phosphate shunt (GO:0006098);; Biological Process: mul…	K01803|2.33757e-77|gga:396435|K01803 triosephosphate isomerase (TIM) [EC:5.3.1.1] | (RefSeq) TPI1; triosephosphate isomerase 1	Glycolysis / Gluconeogenesis (ko00010);; Fructose and mannose metabolism (ko00051);; Inositol phosphate metabolism (ko00562);; Carbon metabolism (ko01200);; Biosynthesis of amino acids (ko01230)	[G]	Carbohydrate transport and metabolism	Triosephosphate isomerase	Triosephosphate isomerase OS=Gallus gallus OX=9031 GN=TPI1 PE=1 SV=2	G	Carbohydrate transport and metabolism	hypothetical protein ASZ78_000773 [Callipepla squamata]
Gallus_gallus_newGene_2075	73	5	22	19	46	72	112	70	66	98	0.116174	0.005991	0.031011	0.023369	0.072272	0.136106	0.545938	0.110933	0.125213	0.302842	0.00900091	1.76567	up	--	--	Molecular Function: RNA binding (GO:0003723);; Molecular Function: RNA-directed DNA polymerase activity (GO:0003964);; Biological Process: RNA-dependent DNA biosynthetic process (GO:0006278);;	--	--	--	--	--	--	S	Function unknown	hypothetical protein AS27_14818, partial [Aptenodytes forsteri]
Gallus_gallus_newGene_21022	2520	2249	2955	2228	2560	3775	4488	3551	3245	3759	29.3125	22.9867	30.3065	20.2559	29.0984	51.831	45.2819	40.4423	50.4554	43.0219	0.000287871	1.09094	up	--	--	Molecular Function: protein serine/threonine kinase activity (GO:0004674);; Molecular Function: ATP binding (GO:0005524);; Biological Process: protein phosphorylation (GO:0006468);;	K08868|9.80525e-170|gga:768936|K08868 alpha-kinase | (RefSeq) ALPK3; alpha kinase 3	--	--	--	--	--	S	Function unknown	hypothetical protein CIB84_001062 [Bambusicola thoracicus]
Gallus_gallus_newGene_21069	69	29	61	10	83	132	281	362	100	84	1.35776	0.517216	1.08953	0.147538	1.60813	3.0825	4.85089	7.17674	2.34728	1.64502	0.0145074	2.36713	up	[G]	Carbohydrate transport and metabolism	Molecular Function: phosphorylase kinase activity (GO:0004689);; Molecular Function: calmodulin binding (GO:0005516);; Cellular Component: phosphorylase kinase complex (GO:0005964);; Biological Process: glycogen metabolic process (GO:0005977);; Biological Process: protein phosphorylation (GO:0006468);;	K07190|3.7361e-67|gga:415741|K07190 phosphorylase kinase alpha/beta subunit | (RefSeq) PHKB; phosphorylase kinase regulatory subunit beta	Calcium signaling pathway (ko04020);; Insulin signaling pathway (ko04910)	[G]	Carbohydrate transport and metabolism	--	Phosphorylase b kinase regulatory subunit alpha, liver isoform OS=Takifugu rubripes OX=31033 GN=phka2 PE=3 SV=1	T	Signal transduction mechanisms	PREDICTED: phosphorylase b kinase regulatory subunit beta-like, partial [Chlamydotis macqueenii]
Gallus_gallus_newGene_21346	81	93	92	70	74	293	426	414	337	437	0.557393	0.370354	0.283726	0.195519	0.35636	1.81781	2.16813	2.47084	2.42367	2.53291	1.56583e-08	2.70906	up	--	--	--	--	--	--	--	--	--	--	--	--
Gallus_gallus_newGene_21552	44	0	3	123	94	131	75	74	105	128	0.500045	0	0.021049	1.10746	1.04218	1.76267	0.74111	0.840017	1.40766	1.45124	0.0464865	1.50403	up	--	--	Molecular Function: RNA binding (GO:0003723);; Molecular Function: RNA-directed DNA polymerase activity (GO:0003964);; Biological Process: RNA-dependent DNA biosynthetic process (GO:0006278);;	--	--	--	--	--	--	S	Function unknown	hypothetical protein N339_04974, partial [Pterocles gutturalis]
Gallus_gallus_newGene_21613	0	0	0	0	0	4708	9119	5973	5127	3498	0	0	0	0	0	55.6147	62.0555	55.6236	55.7813	32.7745	1.41146e-70	Inf	up	--	--	--	--	--	--	--	Immunoglobulin I-set domain	--	S	Function unknown	PREDICTED: immunoglobulin-like and fibronectin type III domain-containing protein 1 isoform X47 [Gallus gallus]
Gallus_gallus_newGene_21617	0	0	0	0	0	387	549	1138	939	635	0	0	0	0	0	14.5012	15.2481	28.9055	26.9664	17.3385	8.07195e-26	Inf	up	--	--	--	--	--	--	--	--	--	--	--	PREDICTED: immunoglobulin-like and fibronectin type III domain-containing protein 1 isoform X47 [Gallus gallus]
Gallus_gallus_newGene_21618	0	0	0	0	0	141	60	271	52	114	0	0	0	0	0	6.937	2.22663	11.7211	2.36799	4.59752	4.80851e-09	Inf	up	--	--	--	--	--	--	--	--	--	--	--	hypothetical protein AV530_004421 [Patagioenas fasciata monilis]
Gallus_gallus_newGene_23546	2266	2795	2435	3626	2379	4076	5059	4083	4444	4930	37.8307	42.5331	36.6012	47.8791	38.8191	80.2504	73.14	67.8359	87.5054	81.6163	2.38097e-05	1.26516	up	[M]	Cell wall/membrane/envelope biogenesis	Molecular Function: glycogen (starch) synthase activity (GO:0004373);; Biological Process: glycogen biosynthetic process (GO:0005978);;	K00693|8.64888e-83|shr:100920298|K00693 glycogen synthase [EC:2.4.1.11] | (RefSeq) GYS1; glycogen synthase 1	Starch and sucrose metabolism (ko00500);; PI3K-Akt signaling pathway (ko04151);; AMPK signaling pathway (ko04152);; Insulin signaling pathway (ko04910);; Glucagon signaling pathway (ko04922);; Insulin resistance (ko04931)	[G]	Carbohydrate transport and metabolism	Glycogen synthase;; Glycogen synthase	--	M	Cell wall/membrane/envelope biogenesis	PREDICTED: glycogen [starch] synthase, muscle-like [Salmo salar]
Gallus_gallus_newGene_23643	80	40	85	70	124	115	248	127	97	173	1.45624	0.652714	1.37747	0.995158	2.19652	2.45784	3.89751	2.29185	2.07892	3.10905	0.0348334	1.3743	up	--	--	--	--	--	--	--	Serpentine type 7TM GPCR chemoreceptor Sri	--	--	--	--
Gallus_gallus_newGene_24361	304	198	418	478	429	531	575	547	568	562	5.52367	2.41272	6.97717	7.66031	7.73092	10.0012	7.82916	9.18105	13.0492	11.4131	0.0130986	1.13498	up	--	--	--	--	--	--	--	--	--	S	Function unknown	PREDICTED: uncharacterized protein LOC106581609 [Salmo salar]
Gallus_gallus_newGene_24651	1271	362	1479	526	1091	1570	1721	1660	1267	860	24.6659	6.40679	25.8468	8.06255	26.5272	35.9215	28.9223	32.058	28.9924	16.5531	0.0247812	1.08791	up	--	--	Molecular Function: voltage-gated sodium channel activity (GO:0005248);; Biological Process: sodium ion transport (GO:0006814);; Biological Process: movement of cell or subcellular component (GO:0006928);; Molecular Function: sodium channel regulator activity (GO:0017080);; Biological Process: neuron projection development (GO:0031175);; Biological Process: ion transmembrane transport (GO:0034220…	--	--	--	--	--	--	U	Intracellular trafficking, secretion, and vesicular transport	PREDICTED: sodium channel subunit beta-1-like [Pseudopodoces humilis]
Gallus_gallus_newGene_24723	289	176	279	371	220	733	577	554	515	430	16.7644	9.2927	14.5867	17.0159	12.4828	50.2311	29.0375	31.9959	35.2402	24.7443	0.000174629	1.62362	up	--	--	Cellular Component: nucleus (GO:0005634);; Molecular Function: oxidoreductase activity, acting on the CH-CH group of donors (GO:0016627);; Cellular Component: integral component of endoplasmic reticulum membrane (GO:0030176);; Biological Process: fatty acid elongation (GO:0030497);; Biological Process: very long-chain fatty acid biosynthetic process (GO:0042761);; Biological Process: oxidation-re…	K10258|4.58222e-43|fpg:101911436|K10258 very-long-chain enoyl-CoA reductase [EC:1.3.1.93] | (RefSeq) very-long-chain enoyl-CoA reductase-like	Fatty acid elongation (ko00062);; Biosynthesis of unsaturated fatty acids (ko01040);; Fatty acid metabolism (ko01212)	[I]	Lipid transport and metabolism	--	--	S	Function unknown	PREDICTED: uncharacterized protein LOC106899679 [Calidris pugnax]
Gallus_gallus_newGene_25030	7078	4231	8226	6594	4504	14580	19216	17153	13207	10564	110.523	60.2108	115.611	81.4062	68.7148	424.291	351.579	266.472	243.146	163.527	1.3163e-08	1.8099	up	[G]	Carbohydrate transport and metabolism	Biological Process: glycogen catabolic process (GO:0005980);; Molecular Function: glycogen phosphorylase activity (GO:0008184);; Molecular Function: pyridoxal phosphate binding (GO:0030170);; Cellular Component: apical part of cell (GO:0045177);; Cellular Component: perinuclear region of cytoplasm (GO:0048471);;	K00688|2.02693e-38|shr:100915891|K00688 glycogen phosphorylase [EC:2.4.1.1] | (RefSeq) PYGM; glycogen phosphorylase, muscle associated	Starch and sucrose metabolism (ko00500);; Insulin signaling pathway (ko04910);; Glucagon signaling pathway (ko04922);; Insulin resistance (ko04931)	[G]	Carbohydrate transport and metabolism	--	--	G	Carbohydrate transport and metabolism	PREDICTED: glycogen phosphorylase, liver form-like [Protobothrops mucrosquamatus]
Gallus_gallus_newGene_2517	15	20	22	17	13	306	432	449	133	101	0.365015	0.105449	0.110771	0.095173	0.067577	3.9518	3.02049	4.67416	1.38927	0.698888	1.43783e-06	4.54473	up	--	--	--	--	--	--	--	--	--	S	Function unknown	hypothetical protein llap_1601 [Limosa lapponica baueri]
Gallus_gallus_newGene_25321	15422	7510	19155	11660	13277	39036	47714	50136	42774	36673	1239.09	549.971	1385.24	740.691	1042.31	3697.82	3319.32	4007.85	4052.12	2921.28	2.3477e-11	2.20458	up	[G]	Carbohydrate transport and metabolism	Molecular Function: fructose-bisphosphate aldolase activity (GO:0004332);; Biological Process: glycolytic process (GO:0006096);;	K01623|1.482e-21|xla:379336|K01623 fructose-bisphosphate aldolase, class I [EC:4.1.2.13] | (RefSeq) aldoa.S, aldoa; aldolase, fructose-bisphosphate A S homeolog	Glycolysis / Gluconeogenesis (ko00010);; Pentose phosphate pathway (ko00030);; Fructose and mannose metabolism (ko00051);; Carbon metabolism (ko01200);; Biosynthesis of amino acids (ko01230)	[G]	Carbohydrate transport and metabolism	Fructose-bisphosphate aldolase class-I	Fructose-bisphosphate aldolase C-B OS=Danio rerio OX=7955 GN=aldocb PE=2 SV=1	G	Carbohydrate transport and metabolism	PREDICTED: fructose-bisphosphate aldolase A-like [Meleagris gallopavo]
Gallus_gallus_newGene_25927	38	172	111	117	65	191	434	216	175	614	0.281291	1.16147	0.735167	0.880986	0.42533	1.87655	3.37886	1.89678	2.17477	5.45147	0.000904876	2.15427	up	--	--	--	--	--	--	--	--	--	--	--	--
Gallus_gallus_newGene_27463	12	0	6	0	14	421	185	174	257	273	0.124165	0	0.064553	0	0.151751	5.59122	2.00791	1.82195	3.41108	3.11959	1.47116e-11	5.81968	up	--	--	--	K10408|9.33988e-14|amj:102564006|K10408 dynein heavy chain, axonemal | (RefSeq) DNAH11; dynein axonemal heavy chain 11	--	[Z]	Cytoskeleton	--	--	--	--	PREDICTED: dynein heavy chain 11, axonemal [Crocodylus porosus]
Gallus_gallus_newGene_3245	150	107	169	114	164	762	508	622	245	362	0.340244	0.19976	0.281901	0.193749	0.325588	1.66408	0.849546	1.37066	0.496594	0.762447	0.000909599	2.34074	up	--	--	--	--	--	--	--	--	--	--	--	PREDICTED: uncharacterized protein LOC106896623 [Calidris pugnax]
Gallus_gallus_newGene_47	16	5	6	0	21	51	209	62	114	209	0.031331	0.007521	0.009172	0	0.041762	0.131049	0.379782	0.30201	0.752239	0.42154	3.33569e-07	4.10471	up	--	--	Molecular Function: RNA binding (GO:0003723);; Molecular Function: RNA-directed DNA polymerase activity (GO:0003964);; Molecular Function: ATP binding (GO:0005524);; Cellular Component: nucleoplasm (GO:0005654);; Cellular Component: nucleolus (GO:0005730);; Cellular Component: Golgi stack (GO:0005795);; Biological Process: RNA-dependent DNA biosynthetic process (GO:0006278);; Biological Process: …	--	--	--	--	Transposase (partial DDE domain)	--	S	Function unknown	uncharacterized protein LOC110391435 [Numida meleagris]
Gallus_gallus_newGene_5686	10	14	11	7	14	61	203	99	53	82	0.136772	0.193207	0.1623	0.073256	0.1997	1.26304	3.36628	1.88405	1.11169	1.99658	9.39507e-06	3.58571	up	--	--	--	--	--	--	--	--	--	--	--	--
Gallus_gallus_newGene_6113	11672	27718	36379	9774	26685	29140	51860	40022	19023	25436	67.5814	151.216	161.954	29.0194	168.955	160.755	270.594	243.322	115.392	138.126	0.0412321	1.0379	up	[C]	Energy production and conversion	Cellular Component: mitochondrial inner membrane (GO:0005743);; Biological Process: mitochondrial electron transport, ubiquinol to cytochrome c (GO:0006122);; Molecular Function: ubiquinol-cytochrome-c reductase activity (GO:0008121);; Molecular Function: electron carrier activity (GO:0009055);; Cellular Component: respiratory chain complex III (GO:0045275);; Molecular Function: metal ion binding…	K03883|0|gga:807642|K03883 NADH-ubiquinone oxidoreductase chain 5 [EC:1.6.5.3] | (RefSeq) ND5; NADH dehydrogenase subunit 5	Oxidative phosphorylation (ko00190)	[C]	Energy production and conversion	NADH dehydrogenase	NADH-ubiquinone oxidoreductase chain 5 OS=Gallus gallus OX=9031 GN=MT-ND5 PE=3 SV=1	C	Energy production and conversion	cytochrome b (mitochondrion) [Gallus gallus]
gene1001	2798	2310	2860	2906	2005	4366	5469	3666	3936	2786	27.3431	16.6075	22.4057	18.5308	15.676	46.1794	40.6179	25.0062	38.3916	21.8583	0.000231857	1.18101	up	[R]	General function prediction only	Molecular Function: receptor activity (GO:0004872);; Cellular Component: integral component of membrane (GO:0016021);; Molecular Function: identical protein binding (GO:0042802);; Molecular Function: protein heterodimerization activity (GO:0046982);;	K07297|0|apla:101790569|K07297 adiponectin receptor | (RefSeq) ADIPOR2; adiponectin receptor 2	Adipocytokine signaling pathway (ko04920)	[RT]	General function prediction only;; Signal transduction mechanisms	Haemolysin-III related	Membrane progestin receptor alpha GN=mpra OS=Cynoscion nebulosus (Spotted seatrout) PE=1 SV=1	T	Signal transduction mechanisms	PREDICTED: adiponectin receptor protein 2 isoform X1 [Anas platyrhynchos]
gene10010	433	861	809	636	497	2567	4738	3195	2711	2411	1.87525	3.40336	3.15738	2.18199	2.10353	13.1608	17.8424	13.9425	14.064	10.3708	2.84144e-17	2.7842	up	--	--	Biological Process: response to hypoxia (GO:0001666);; Molecular Function: iron ion binding (GO:0005506);; Cellular Component: nucleus (GO:0005634);; Cellular Component: cytoplasm (GO:0005737);; Biological Process: activation of cysteine-type endopeptidase activity involved in apoptotic process (GO:0006919);; Biological Process: protein hydroxylation (GO:0018126);; Biological Process: peptidyl-pr…	K09592|1.17082e-177|phi:102112105|K09592 hypoxia-inducible factor prolyl hydroxylase [EC:1.14.11.29] | (RefSeq) EGLN3; egl-9 family hypoxia inducible factor 3	--	[T]	Signal transduction mechanisms	2OG-Fe(II) oxygenase superfamily;; 2OG-Fe(II) oxygenase superfamily	--	T	Signal transduction mechanisms	PREDICTED: egl nine homolog 3 isoform X2 [Gallus gallus]
gene10074	8127	5781	7283	3164	6874	11636	14683	10701	7437	8389	30.8762	20.015	24.9013	9.50555	25.5135	52.1225	48.3009	40.4431	33.3141	31.6014	0.000198678	1.23632	up	[RTKL]	General function prediction only;; Signal transduction mechanisms;; Transcription;; Replication, recombination and repair	Molecular Function: protein serine/threonine kinase activity (GO:0004674);; Molecular Function: ATP binding (GO:0005524);; Cellular Component: mitochondrion (GO:0005739);; Molecular Function: protein kinase binding (GO:0019901);;	K20878|0|gga:428891|K20878 NIMA (never in mitosis gene a)-related kinase 9 [EC:2.7.11.1] | (RefSeq) NEK9; NIMA related kinase 9	--	[S]	Function unknown	Protein kinase domain;; Regulator of chromosome condensation (RCC1) repeat;; Protein tyrosine kinase;; Regulator of chromosome condensation (RCC1) repeat;; Avian adenovirus fibre	Serine/threonine-protein kinase Nek9 GN=nek9 OS=Xenopus laevis (African clawed frog) PE=2 SV=1	R	General function prediction only	PREDICTED: serine/threonine-protein kinase Nek9 isoform X1 [Gallus gallus]
gene1009	1869	1507	223	2142	2045	2455	3140	2553	2005	2151	9.54438	6.86718	0.765102	6.98517	10.6542	15.7616	11.3082	10.5391	12.5546	8.82636	0.000284321	1.15223	up	[G]	Carbohydrate transport and metabolism	Cellular Component: mitochondrion (GO:0005739);;	--	--	[R]	General function prediction only	Haloacid dehalogenase-like hydrolase;; HAD-hyrolase-like	--	R	General function prediction only	PREDICTED: cat eye syndrome critical region protein 5 isoform X5 [Gallus gallus]
gene10243	97	101	128	100	194	340	342	221	225	379	0.652763	0.595324	0.837252	0.499526	1.48823	2.93685	2.30278	1.93844	2.0542	3.0163	0.000809952	1.76069	up	--	--	--	--	--	--	--	Protein incorporated later into Tight Junctions	--	S	Function unknown	PREDICTED: brain-enriched guanylate kinase-associated protein isoform X2 [Corvus cornix cornix]
gene1029	9845	10635	9930	10421	7839	89372	124695	111693	79231	66518	49.1814	48.593	44.77	41.3168	38.4319	521.529	536.247	549.991	463.778	328.435	1.19045e-28	3.79215	up	[G]	Carbohydrate transport and metabolism	Molecular Function: phosphoglycerate mutase activity (GO:0004619);; Biological Process: glycolytic process (GO:0006096);;	K01837|2.79567e-176|apla:101803151|K01837 bisphosphoglycerate/phosphoglycerate mutase [EC:5.4.2.4 5.4.2.11] | (RefSeq) BPGM; bisphosphoglycerate mutase	Glycolysis / Gluconeogenesis (ko00010);; Glycine, serine and threonine metabolism (ko00260)	[G]	Carbohydrate transport and metabolism	Histidine phosphatase superfamily (branch 1);; Reverse transcriptase (RNA-dependent DNA polymerase)	Phosphoglycerate mutase 1 OS=Gallus gallus (Chicken) PE=1 SV=3	G	Carbohydrate transport and metabolism	PREDICTED: bisphosphoglycerate mutase isoform X1 [Meleagris gallopavo]
gene10298	557	1128	1856	1742	834	2404	2683	3215	2591	3320	4.94582	9.22782	15.1535	12.5036	7.28091	25.7207	21.0424	29.0281	27.8467	29.7814	2.31241e-10	1.76162	up	--	--	--	--	--	--	--	Domain of unknown function (DUF4658);; Consortin C-terminus	--	S	Function unknown	PREDICTED: transmembrane protein C14orf180 homolog isoform X1 [Gallus gallus]
gene10337	359	339	339	494	393	904	672	313	568	911	3.782	3.36333	3.22972	4.17035	4.15473	11.1601	6.12532	3.25491	6.94946	9.60774	0.00900091	1.3253	up	--	--	Molecular Function: DNA binding (GO:0003677);; Cellular Component: nucleus (GO:0005634);; Cellular Component: cytoplasm (GO:0005737);; Biological Process: gene expression (GO:0010467);; Molecular Function: metal ion binding (GO:0046872);;	K10504|0|gga:423505|K10504 zinc finger and BTB domain-containing protein 25 | (RefSeq) ZBTB25; zinc finger and BTB domain containing 25	--	[R]	General function prediction only	BTB/POZ domain;; Zinc finger, C2H2 type;; C2H2-type zinc finger;; Zinc-finger double-stranded RNA-binding	Myoneurin GN=mynn OS=Xenopus laevis (African clawed frog) PE=2 SV=1	R	General function prediction only	PREDICTED: zinc finger and BTB domain-containing protein 25 isoform X5 [Gallus gallus]
gene10369	58	114	119	76	186	996	1288	898	629	724	0.364152	0.664491	0.683889	0.382049	1.72818	13.0743	11.8819	9.40817	7.51274	7.16145	1.34327e-21	3.52096	up	[RTKL]	General function prediction only;; Signal transduction mechanisms;; Transcription;; Replication, recombination and repair	--	K18051|0|gga:423518|K18051 novel protein kinase C eta type [EC:2.7.11.13] | (RefSeq) PRKCH, RP11-47I22.4; protein kinase C eta	Vascular smooth muscle contraction (ko04270);; Tight junction (ko04530)	[T]	Signal transduction mechanisms	Protein kinase domain;; Protein tyrosine kinase;; Phorbol esters/diacylglycerol binding domain (C1 domain);; C2 domain;; Protein kinase C terminal domain;; Kinase-like	Protein kinase C beta type GN=prkcbb OS=Danio rerio (Zebrafish) PE=2 SV=1	T	Signal transduction mechanisms	PREDICTED: LOW QUALITY PROTEIN: protein kinase C eta type [Gallus gallus]
gene10408	43	15	152	64	30	274	140	228	153	428	0.13051	0.03987	0.417536	0.154893	0.0879	0.988658	0.36976	0.695601	0.551783	1.29958	4.55598e-05	2.5367	up	--	--	--	--	--	--	--	--	--	S	Function unknown	PREDICTED: uncharacterized protein C14orf37 isoform X6 [Gallus gallus]
gene10537	32	48	71	87	0	46	102	68	101	149	0.698865	0.968963	1.40838	1.52802	0	1.19644	1.94496	1.49109	2.6361	3.27342	0.0449182	1.51245	up	--	--	--	--	--	--	--	--	--	--	--	--
gene10660	139	193	50	364	72	352	459	397	605	331	1.98813	2.74209	0.634143	4.09159	0.805598	5.32466	4.31629	4.00254	8.82598	5.01286	0.000750312	1.9798	up	--	--	--	--	--	--	--	Synuclein	Alpha-synuclein GN=SNCA OS=Serinus canaria (Island canary) PE=2 SV=1	Z	Cytoskeleton	PREDICTED: gamma-synuclein, partial [Alligator mississippiensis]
gene1067	3238	2605	3817	2694	2670	5571	6405	6495	7764	4604	7.80764	5.72398	8.28474	5.13501	6.28887	15.838	13.3729	15.5817	22.0739	11.0071	3.84974e-05	1.57489	up	[EH]	Amino acid transport and metabolism;; Coenzyme transport and metabolism	Cellular Component: mitochondrion (GO:0005739);; Cellular Component: cytosol (GO:0005829);; Biological Process: branched-chain amino acid biosynthetic process (GO:0009082);; Biological Process: branched-chain amino acid catabolic process (GO:0009083);; Molecular Function: L-leucine transaminase activity (GO:0052654);; Molecular Function: L-valine transaminase activity (GO:0052655);; Molecular Fun…	K00826|0|gga:418193|K00826 branched-chain amino acid aminotransferase [EC:2.6.1.42] | (RefSeq) BCAT1; branched chain amino acid transaminase 1	Cysteine and methionine metabolism (ko00270);; Valine, leucine and isoleucine degradation (ko00280);; Valine, leucine and isoleucine biosynthesis (ko00290);; Pantothenate and CoA biosynthesis (ko00770);; 2-Oxocarboxylic acid metabolism (ko01210);; Biosynthesis of amino acids (ko01230)	[E]	Amino acid transport and metabolism	Aminotransferase class IV	--	E	Amino acid transport and metabolism	PREDICTED: branched-chain-amino-acid aminotransferase, cytosolic isoform X2 [Gallus gallus]
gene10692	873	597	973	1343	630	1069	1626	1345	1344	954	8.65705	5.3953	8.68587	10.5348	6.10473	12.5032	13.966	13.2687	15.717	9.3779	0.00201793	1.06378	up	[H]	Coenzyme transport and metabolism	Molecular Function: methionine adenosyltransferase activity (GO:0004478);; Molecular Function: ATP binding (GO:0005524);; Biological Process: S-adenosylmethionine biosynthetic process (GO:0006556);; Biological Process: one-carbon metabolic process (GO:0006730);; Molecular Function: metal ion binding (GO:0046872);;	K00789|0|gga:423628|K00789 S-adenosylmethionine synthetase [EC:2.5.1.6] | (RefSeq) MAT1A; methionine adenosyltransferase 1A	Cysteine and methionine metabolism (ko00270);; Biosynthesis of amino acids (ko01230)	[H]	Coenzyme transport and metabolism	S-adenosylmethionine synthetase, C-terminal domain;; S-adenosylmethionine synthetase, central domain;; S-adenosylmethionine synthetase, N-terminal domain	--	H	Coenzyme transport and metabolism	S-adenosylmethionine synthase isoform type-1 [Gallus gallus]
gene10738	3282	4103	3978	3798	2770	4419	5267	5979	4649	5462	37.8162	43.0888	41.258	34.6002	31.1801	60.025	52.5426	68.5451	63.1639	62.3927	0.00121003	1.03826	up	--	--	--	K21246|0|gga:423656|K21246 nuclear receptor-binding factor 2 | (RefSeq) NRBF2, RBF-2; nuclear receptor binding factor 2	--	--	--	Domain of unknown function (DUF1875)	--	K	Transcription	nuclear receptor-binding factor 2 [Gallus gallus]
gene10755	3858	4087	4389	4275	3615	5738	6529	6179	5383	5631	15.4858	14.7786	15.7555	14.8748	13.9568	31.6315	25.4009	28.434	26.9892	24.4067	0.00118814	1.05981	up	--	--	--	K09288|0|gga:423666|K09288 coiled-coil domain-containing protein 6 | (RefSeq) CCDC6; coiled-coil domain containing 6	--	[S]	Function unknown	Uncharacterized conserved protein H4 (DUF2046)	--	S	Function unknown	coiled-coil domain-containing protein 6 [Gallus gallus]
gene10757	264	582	330	352	156	1352	1700	1323	1207	862	1.98913	4.20917	2.11074	2.09975	1.23392	12.4976	11.5434	10.294	11.4381	6.68699	1.56205e-12	2.47542	up	[GEPR]	Carbohydrate transport and metabolism;; Amino acid transport and metabolism;; Inorganic ion transport and metabolism;; General function prediction only	Cellular Component: plasma membrane (GO:0005886);; Molecular Function: symporter activity (GO:0015293);; Cellular Component: integral component of membrane (GO:0016021);; Biological Process: transmembrane transport (GO:0055085);;	K08186|0|gga:423667|K08186 MFS transporter, MCP family, solute carrier family 16 (monocarboxylic acid transporters), member 9 | (RefSeq) SLC16A9; solute carrier family 16 member 9	--	[G]	Carbohydrate transport and metabolism	Major Facilitator Superfamily	Monocarboxylate transporter 9 GN=SLC16A9 OS=Gallus gallus (Chicken) PE=2 SV=1	G	Carbohydrate transport and metabolism	monocarboxylate transporter 9 [Gallus gallus]
gene10926	3122	3611	3018	3483	2829	4611	6691	4373	4098	3637	15.7176	16.5844	13.6845	13.8695	13.8562	27.3684	29.1458	21.9159	24.303	17.944	0.000812078	1.05468	up	--	--	--	--	--	[Y]	Nuclear structure	SRP40, C-terminal domain	--	Y	Nuclear structure	PREDICTED: nucleolar and coiled-body phosphoprotein 1 isoform X2 [Gallus gallus]
gene10936	198	183	181	257	218	295	449	394	232	264	1.44968	1.35087	1.35224	1.125	2.36402	2.28678	3.13377	3.52757	1.99352	2.18582	0.038644	1.15634	up	--	--	Biological Process: G2/M transition of mitotic cell cycle (GO:0000086);; Molecular Function: ubiquitin-protein transferase activity (GO:0004842);; Cellular Component: cytoplasm (GO:0005737);; Biological Process: protein ubiquitination (GO:0016567);; Cellular Component: SCF ubiquitin ligase complex (GO:0019005);; Biological Process: positive regulation of BMP signaling pathway (GO:0030513);; Biolo…	K10281|0|gga:428951|K10281 F-box and leucine-rich repeat protein 15 | (RefSeq) FBXL15; F-box and leucine rich repeat protein 15	--	[R]	General function prediction only	--	F-box/LRR-repeat protein 15 GN=fbxl15 OS=Xenopus laevis (African clawed frog) PE=2 SV=1	R	General function prediction only	PREDICTED: F-box/LRR-repeat protein 15 isoform X3 [Gallus gallus]
gene10937	964	1120	1047	1137	1053	1490	1817	1596	927	1779	14.3366	15.1332	13.8341	13.166	15.1021	26.1066	23.3572	23.7907	15.9338	26.3919	0.001235	1.00312	up	--	--	Cellular Component: nucleus (GO:0005634);; Cellular Component: cytoplasm (GO:0005737);;	--	--	--	--	--	CUE domain-containing protein 2-A GN=cuedc2-a OS=Xenopus laevis (African clawed frog) PE=1 SV=1	S	Function unknown	CUE domain-containing protein 2 isoform 1 [Gallus gallus]
gene11074	90	102	106	82	103	204	264	196	225	225	0.332777	0.351503	0.386465	0.239288	0.711605	0.816369	0.706465	0.618743	2.31296	1.84754	0.00383181	1.71006	up	--	--	Cellular Component: proteinaceous extracellular matrix (GO:0005578);; Biological Process: carbohydrate metabolic process (GO:0005975);; Cellular Component: membrane (GO:0016020);; Molecular Function: hydrolase activity, acting on glycosyl bonds (GO:0016798);; Molecular Function: heparan sulfate proteoglycan binding (GO:0043395);;	K07965|0|gga:423834|K07965 heparanase 2 [EC:3.2.1.-] | (RefSeq) HPSE2; heparanase 2 (inactive)	Glycosaminoglycan degradation (ko00531)	--	--	Glycosyl hydrolase family 79, N-terminal domain	Heparanase (Precursor) GN=HPSE OS=Gallus gallus (Chicken) PE=1 SV=1	G	Carbohydrate transport and metabolism	PREDICTED: inactive heparanase-2 isoform X8 [Gallus gallus]
gene11094	127980	171876	151942	170882	127196	357759	478887	434563	426164	435494	1550.11	1897.5	1656.42	1636.39	1505.23	5108.63	5021.97	5236.6	6085.81	5229.4	7.82104e-10	2.02656	up	[G]	Carbohydrate transport and metabolism	Molecular Function: bisphosphoglycerate mutase activity (GO:0004082);; Molecular Function: bisphosphoglycerate 2-phosphatase activity (GO:0004083);; Molecular Function: phosphoglycerate mutase activity (GO:0004619);; Cellular Component: cytosol (GO:0005829);; Biological Process: gluconeogenesis (GO:0006094);; Biological Process: glycolytic process (GO:0006096);; Biological Process: small molecule…	K01834|0|gga:428969|K01834 2,3-bisphosphoglycerate-dependent phosphoglycerate mutase [EC:5.4.2.11] | (RefSeq) PGAM1; phosphoglycerate mutase 1	Glycolysis / Gluconeogenesis (ko00010);; Glycine, serine and threonine metabolism (ko00260);; Carbon metabolism (ko01200);; Biosynthesis of amino acids (ko01230)	[G]	Carbohydrate transport and metabolism	Histidine phosphatase superfamily (branch 1)	Phosphoglycerate mutase 1 OS=Gallus gallus (Chicken) PE=1 SV=3	G	Carbohydrate transport and metabolism	phosphoglycerate mutase 1 [Gallus gallus]
gene11095	1935	1930	2510	3095	2699	3643	5332	5448	3908	6636	11.8609	8.0133	13.9798	15.8328	16.6872	31.8712	33.0676	35.6134	33.1502	34.3918	6.07529e-08	1.52802	up	--	--	Cellular Component: nucleolus (GO:0005730);; Cellular Component: integral component of membrane (GO:0016021);; Cellular Component: nuclear membrane (GO:0031965);;	K14794|0|gga:423845|K14794 ribosomal RNA-processing protein 12 | (RefSeq) RRP12; ribosomal RNA processing 12 homolog	--	[S]	Function unknown	NUC173 domain	RRP12-like protein GN=RRP12 OS=Gallus gallus (Chicken) PE=2 SV=1	A	RNA processing and modification	RRP12-like protein [Gallus gallus]
gene11108	246	259	231	487	240	419	446	255	445	536	4.93601	4.73589	4.17083	7.74298	4.70504	9.93647	7.76003	5.09103	10.5435	10.6744	0.0465932	1.05771	up	--	--	--	K11278|9.77567e-84|gga:770430|K11278 nucleophosmin 3 | (RefSeq) NPM3; nucleophosmin/nucleoplasmin 3	--	--	--	Nucleoplasmin	Nucleoplasmin-like protein NO29 OS=Xenopus laevis (African clawed frog) PE=2 SV=1	S	Function unknown	PREDICTED: nucleoplasmin-3 isoform X1 [Gallus gallus]
gene11178	667	1296	1391	1906	1120	5487	6927	5251	5994	5131	1.76343	3.27181	3.48569	4.00646	2.88952	16.2285	15.3114	13.5164	18.3768	13.4289	1.97868e-22	2.72307	up	--	--	--	--	--	--	--	RNA recognition motif. (a.k.a. RRM, RBD, or RNP domain);; RNA recognition motif (a.k.a. RRM, RBD, or RNP domain);; Zinc-finger double-stranded RNA-binding	--	R	General function prediction only	PREDICTED: RNA-binding protein 20 [Gallus gallus]
gene11287	1256	2977	3930	2572	1376	2644	5782	3476	2694	2526	5.49189	11.8762	15.4843	8.89699	5.88558	13.6443	21.9125	15.1364	13.9047	10.9582	0.0382238	1.01882	up	[I]	Lipid transport and metabolism	Molecular Function: acyl-CoA dehydrogenase activity (GO:0003995);; Molecular Function: flavin adenine dinucleotide binding (GO:0050660);;	K09478|0|gga:423947|K09478 short/branched chain acyl-CoA dehydrogenase [EC:1.3.99.12] | (RefSeq) ACADSB; acyl-CoA dehydrogenase, short/branched chain	Fatty acid degradation (ko00071);; Valine, leucine and isoleucine degradation (ko00280);; Fatty acid metabolism (ko01212)	[I]	Lipid transport and metabolism	Acyl-CoA dehydrogenase, C-terminal domain;; Acyl-CoA dehydrogenase, C-terminal domain;; Acyl-CoA dehydrogenase, N-terminal domain;; Acyl-CoA dehydrogenase, middle domain	--	I	Lipid transport and metabolism	short/branched chain specific acyl-CoA dehydrogenase, mitochondrial [Gallus gallus]
gene1141	314	534	369	691	415	654	828	1058	489	1009	2.81226	4.5322	3.12859	5.02528	3.88843	7.37079	6.84198	10.1635	5.50901	9.50381	0.000458705	1.29984	up	--	--	--	K20411|0|gga:418237|K20411 proline-rich protein 5 | (RefSeq) PRR5; proline rich 5	mTOR signaling pathway (ko04150)	--	--	HbrB-like	Proline-rich protein 5 GN=prr5 OS=Xenopus laevis (African clawed frog) PE=2 SV=1	R	General function prediction only	proline-rich protein 5 [Gallus gallus]
gene11479	413	278	612	421	364	757	843	812	383	562	0.948446	0.581449	1.26648	0.766101	0.818346	2.05341	1.67854	1.85808	1.03726	1.28068	0.00356913	1.19373	up	--	--	--	--	--	--	--	Uncharacterised protein family UPF0560	Protein FAM171A1 (Precursor) GN=fam171a1 OS=Xenopus laevis (African clawed frog) PE=2 SV=1	S	Function unknown	PREDICTED: protein FAM171B isoform X3 [Gallus gallus]
gene11500	3006	2728	4508	3482	3475	4730	6080	6513	4670	3346	6.78396	5.27516	8.00858	7.69672	7.73644	11.1974	11.0058	14.971	10.7671	6.83203	0.000866396	1.08502	up	[RTKL]	General function prediction only;; Signal transduction mechanisms;; Transcription;; Replication, recombination and repair	Biological Process: neural crest cell migration (GO:0001755);; Molecular Function: transmembrane receptor protein tyrosine kinase activity (GO:0004714);; Molecular Function: signal transducer, downstream of receptor, with protein tyrosine kinase activity (GO:0004716);; Molecular Function: epidermal growth factor receptor binding (GO:0005154);; Molecular Function: ATP binding (GO:0005524);; Cellul…	K05085|0|apla:101801144|K05085 receptor tyrosine-protein kinase erbB-4 [EC:2.7.10.1] | (RefSeq) ERBB4; erb-b2 receptor tyrosine kinase 4	ErbB signaling pathway (ko04012);; Calcium signaling pathway (ko04020);; Endocytosis (ko04144)	[T]	Signal transduction mechanisms	Protein tyrosine kinase;; Receptor L domain;; Growth factor receptor domain IV;; Protein kinase domain;; Furin-like cysteine rich region	Melanoma receptor tyrosine-protein kinase (Precursor) GN=xmrk OS=Xiphophorus maculatus (Southern platyfish) PE=2 SV=2	T	Signal transduction mechanisms	ovarian receptor tyrosine kinase erbB4 precusor [Gallus gallus]
gene11607	4342	3420	4656	2753	3574	15547	18669	10933	9931	6727	10.5251	8.54038	8.4932	5.5255	7.55908	44.2766	41.8115	27.8318	30.3173	18.2569	2.44466e-05	2.23255	up	[E]	Amino acid transport and metabolism	--	K01425|0|apla:101803541|K01425 glutaminase [EC:3.5.1.2] | (RefSeq) GLS; glutaminase	Arginine biosynthesis (ko00220);; Alanine, aspartate and glutamate metabolism (ko00250);; D-Glutamine and D-glutamate metabolism (ko00471)	[E]	Amino acid transport and metabolism	Glutaminase;; Ankyrin repeats (many copies);; Ankyrin repeats (3 copies);; Ankyrin repeat;; Ankyrin repeat	Ankyrin repeat domain-containing protein 46 GN=ankrd46 OS=Danio rerio (Zebrafish) PE=2 SV=1	E	Amino acid transport and metabolism	PREDICTED: glutaminase kidney isoform, mitochondrial [Cuculus canorus]
gene11628	4331	1886	3166	5339	3055	7313	7984	7061	6277	5854	37.0713	16.1121	19.3632	37.1698	26.665	72.6567	60.1967	61.6958	64.6251	48.6842	1.25895e-06	1.48633	up	[I]	Lipid transport and metabolism	Cellular Component: mitochondrion (GO:0005739);;	K18588|9.43368e-150|gga:424057|K18588 coenzyme Q-binding protein COQ10 | (RefSeq) COQ10B; coenzyme Q10B	--	[I]	Lipid transport and metabolism	Polyketide cyclase / dehydrase and lipid transport	Coenzyme Q-binding protein COQ10 homolog A, mitochondrial (Precursor) GN=coq10b-a OS=Xenopus laevis (African clawed frog) PE=2 SV=1	I	Lipid transport and metabolism	PREDICTED: coenzyme Q-binding protein COQ10 homolog B, mitochondrial [Gallus gallus]
gene11645	2840	2549	5845	1755	4598	3814	7359	7713	2726	5309	6.4568	6.93128	12.0708	3.69319	14.0608	9.89842	14.7291	24.0624	7.2856	15.1066	0.0327648	1.07137	up	[F]	Nucleotide transport and metabolism	Molecular Function: iron ion binding (GO:0005506);; Molecular Function: UDP-N-acetylmuramate dehydrogenase activity (GO:0008762);; Molecular Function: electron carrier activity (GO:0009055);; Molecular Function: flavin adenine dinucleotide binding (GO:0050660);; Molecular Function: NAD binding (GO:0051287);; Molecular Function: 2 iron, 2 sulfur cluster binding (GO:0051537);;	K00157|0|gga:424071|K00157 aldehyde oxidase [EC:1.2.3.1] | (RefSeq) AOX1; aldehyde oxidase 1	Valine, leucine and isoleucine degradation (ko00280);; Tyrosine metabolism (ko00350);; Tryptophan metabolism (ko00380);; Vitamin B6 metabolism (ko00750);; Nicotinate and nicotinamide metabolism (ko00760);; Retinol metabolism (ko00830);; Drug metabolism - cytochrome P450 (ko00982)	[F]	Nucleotide transport and metabolism	Molybdopterin-binding domain of aldehyde dehydrogenase;; FAD binding domain in molybdopterin dehydrogenase;; Aldehyde oxidase and xanthine dehydrogenase, a/b hammerhead domain;; [2Fe-2S] binding domain;; CO dehydrogenase flavoprotein C-terminal domain;; 2Fe-2S iron-sulfur cluster binding domain	Xanthine oxidase GN=XDH OS=Gallus gallus (Chicken) PE=1 SV=1	F	Nucleotide transport and metabolism	TPA: TPA_inf: aldehyde oxidase 1 [Gallus gallus]
gene11768	1967	1265	2130	2082	1603	2597	3775	3217	2498	1937	9.58154	5.30953	9.38136	8.38838	8.10844	15.0071	17.1623	15.3494	15.6801	9.45272	0.000104591	1.15116	up	--	--	Cellular Component: integral component of membrane (GO:0016021);; Biological Process: intracellular signal transduction (GO:0035556);; Biological Process: transmembrane transport (GO:0055085);;	--	--	--	--	Membrane transport protein;; Domain found in Dishevelled, Egl-10, and Pleckstrin (DEP)	--	T	Signal transduction mechanisms	PREDICTED: integral membrane protein GPR155 isoform X7 [Gallus gallus]
gene11781	110	156	53	87	73	397	676	405	115	162	0.552181	0.713147	0.237269	0.34397	0.913263	2.37585	3.21965	2.35271	1.2169	0.805741	0.011021	2.34528	up	--	--	--	K04351|0|fpg:101910581|K04351 Rap guanine nucleotide exchange factor 4 | (RefSeq) RAPGEF4; Rap guanine nucleotide exchange factor 4	Adrenergic signaling in cardiomyocytes (ko04261)	[T]	Signal transduction mechanisms	RasGEF domain;; Domain found in Dishevelled, Egl-10, and Pleckstrin (DEP);; Cyclic nucleotide-binding domain;; RasGEF N-terminal motif;; Ras association (RalGDS/AF-6) domain	Ras-specific guanine nucleotide-releasing factor RalGPS1 GN=RALGPS1 OS=Gallus gallus (Chicken) PE=2 SV=1	T	Signal transduction mechanisms	PREDICTED: rap guanine nucleotide exchange factor 4 isoform X1 [Haliaeetus leucocephalus]
gene11805	7592	6010	8189	6565	7909	11820	17266	10799	9996	7678	19.3462	14.1102	18.857	13.6059	19.8085	37.015	48.7625	28.7319	38.7405	19.9744	0.000681248	1.17086	up	--	--	Biological Process: in utero embryonic development (GO:0001701);; Biological Process: suckling behavior (GO:0001967);; Molecular Function: ubiquitin-protein transferase activity (GO:0004842);; Biological Process: ubiquitin-dependent protein catabolic process (GO:0006511);; Biological Process: sensory perception of smell (GO:0007608);; Molecular Function: zinc ion binding (GO:0008270);; Biological…	K11978|0|fpg:101922658|K11978 E3 ubiquitin-protein ligase UBR3 [EC:2.3.2.27] | (RefSeq) UBR3; ubiquitin protein ligase E3 component n-recognin 3 (putative)	--	[O]	Posttranslational modification, protein turnover, chaperones	Putative zinc finger in N-recognin (UBR box)	--	O	Posttranslational modification, protein turnover, chaperones	PREDICTED: E3 ubiquitin-protein ligase UBR3 [Falco peregrinus]
gene11895	3885	3980	4566	5514	4165	7203	11525	7383	5698	7076	17.46	16.3005	18.4678	19.5913	18.2873	38.1644	44.8445	33.6442	30.1899	31.525	2.24362e-05	1.31632	up	--	--	--	K17907|0|gga:425722|K17907 autophagy-related protein 9 | (RefSeq) ATG9A, ATG9; autophagy related 9A	--	[R]	General function prediction only	Autophagy protein Apg9	--	R	General function prediction only	PREDICTED: autophagy-related protein 9A [Haliaeetus leucocephalus]
gene11915	3844	2787	4370	3534	5235	4789	6458	6438	5453	7932	37.5905	24.7274	38.3263	28.0884	48.997	57.3892	57.1658	63.6201	63.8148	78.2193	0.000233215	1.13169	up	[R]	General function prediction only	Biological Process: glycogen biosynthetic process (GO:0005978);; Biological Process: glucose transport (GO:0015758);; Molecular Function: protein kinase binding (GO:0019901);; Molecular Function: adenyl nucleotide binding (GO:0030554);;	K07200|0|gga:424208|K07200 5'-AMP-activated protein kinase, regulatory gamma subunit | (RefSeq) PRKAG3; protein kinase AMP-activated non-catalytic subunit gamma 3	FoxO signaling pathway (ko04068);; Insulin signaling pathway (ko04910);; Adipocytokine signaling pathway (ko04920)	[C]	Energy production and conversion	CBS domain	--	C	Energy production and conversion	5&apos;-AMP-activated protein kinase gamma-3 non-catalytic subunit long form [Gallus gallus]
gene11985	264	294	184	217	101	1277	995	682	557	896	2.8861	2.88838	1.60284	1.89747	0.97507	12.9179	9.33947	7.47098	7.11649	10.2982	9.89768e-07	2.57259	up	--	--	Biological Process: negative regulation of cell growth (GO:0030308);; Cellular Component: ELL-EAF complex (GO:0032783);; Biological Process: positive regulation of transcription, DNA-templated (GO:0045893);; Biological Process: negative regulation of epithelial cell proliferation involved in prostate gland development (GO:0060770);;	K15186|6.27455e-151|gga:424243|K15186 ELL-associated factor | (RefSeq) EAF2; ELL associated factor 2	--	[K]	Transcription	RNA polymerase II transcription elongation factor	ELL-associated factor 2 GN=EAF2 OS=Gallus gallus (Chicken) PE=2 SV=1	K	Transcription	ELL-associated factor 2 [Gallus gallus]
gene12027	131	181	364	210	323	210	752	528	397	280	0.775153	0.946466	1.85941	1.01527	1.29517	1.19673	3.81864	2.96986	2.66921	1.50534	0.0335691	1.3306	up	[R]	General function prediction only	Molecular Function: ferric-chelate reductase activity (GO:0000293);; Cellular Component: multivesicular body (GO:0005771);; Cellular Component: plasma membrane (GO:0005886);; Biological Process: iron ion transport (GO:0006826);; Biological Process: protein secretion (GO:0009306);;	K10142|0|gga:424275|K10142 metalloreductase STEAP3 [EC:1.16.1.-] | (RefSeq) STEAP3; STEAP3 metalloreductase	p53 signaling pathway (ko04115)	--	--	Ferric reductase like transmembrane component;; NADP oxidoreductase coenzyme F420-dependent	--	R	General function prediction only	PREDICTED: metalloreductase STEAP3 isoform X6 [Gallus gallus]
gene1206	1509	2042	1311	2623	2139	3076	4280	3139	4014	4125	13.0241	16.2369	10.4569	18.1975	18.695	32.9599	33.5814	28.3177	40.8129	36.0159	2.15834e-07	1.46911	up	[G]	Carbohydrate transport and metabolism	Molecular Function: catalytic activity (GO:0003824);; Cellular Component: intracellular (GO:0005622);; Biological Process: positive regulation of cardiac muscle cell apoptotic process (GO:0010666);; Biological Process: negative regulation of mitophagy (GO:1901525);; Biological Process: negative regulation of reactive oxygen species metabolic process (GO:2000378);;	K14634|0|mgp:100550068|K14634 fructose-2,6-bisphosphatase [EC:3.1.3.46] | (RefSeq) TIGAR; TP53 induced glycolysis regulatory phosphatase	Fructose and mannose metabolism (ko00051)	[G]	Carbohydrate transport and metabolism	Histidine phosphatase superfamily (branch 1)	Fructose-2,6-bisphosphatase TIGAR GN=tigar OS=Xenopus tropicalis (Western clawed frog) PE=2 SV=1	G	Carbohydrate transport and metabolism	PREDICTED: fructose-2,6-bisphosphatase TIGAR isoform X3 [Gallus gallus]
gene12065	725	1442	1531	2134	1521	5807	10373	4207	5551	1494	0.686023	1.09047	3.03593	3.75055	2.51738	9.59825	12.4375	8.82125	9.02607	2.65727	0.00371198	2.44923	up	--	--	--	--	--	[O]	Posttranslational modification, protein turnover, chaperones	Thrombospondin type 1 domain	Spondin-1 (Precursor) GN=SPON1 OS=Gallus gallus (Chicken) PE=2 SV=1	O	Posttranslational modification, protein turnover, chaperones	PREDICTED: thrombospondin type-1 domain-containing protein 7B [Gallus gallus]
gene12066	1851	717	951	1908	1649	6000	6883	8581	11405	10255	6.83469	2.74093	3.58206	5.97703	5.98861	17.2314	13.3352	26.8887	38.396	23.8931	6.33738e-11	3.12418	up	--	--	--	--	--	--	--	Methyltransferase domain	Histamine N-methyltransferase GN=hnmt OS=Xenopus tropicalis (Western clawed frog) PE=2 SV=1	R	General function prediction only	PREDICTED: histamine N-methyltransferase-like isoform X1 [Gallus gallus]
gene12129	11601	19033	12771	14635	10349	18850	30159	21467	20776	17881	48.3456	70.6204	47.8721	46.2335	42.0743	91.9926	107.713	88.7408	101.036	71.5187	0.000842255	1.19006	up	[C]	Energy production and conversion	--	K00111|0|gga:424321|K00111 glycerol-3-phosphate dehydrogenase [EC:1.1.5.3] | (RefSeq) GPD2; glycerol-3-phosphate dehydrogenase 2	Glycerophospholipid metabolism (ko00564)	[C]	Energy production and conversion	FAD dependent oxidoreductase;; EF-hand domain pair;; FAD binding domain;; EF hand;; EF-hand domain;; FAD dependent oxidoreductase;; Glucose inhibited division protein A;; Pyridine nucleotide-disulphide oxidoreductase	Calmodulin GN=calm OS=Electrophorus electricus (Electric eel) PE=2 SV=2	C	Energy production and conversion	PREDICTED: glycerol-3-phosphate dehydrogenase, mitochondrial [Gallus gallus]
gene12287	193	202	178	294	176	277	256	278	445	404	4.21145	3.86572	3.49606	5.22009	3.65661	6.76757	4.74565	5.73462	10.9649	8.41055	0.0345572	1.21539	up	[MG]	Cell wall/membrane/envelope biogenesis;; Carbohydrate transport and metabolism	Cellular Component: nuclear envelope (GO:0005635);; Cellular Component: cytoplasm (GO:0005737);; Biological Process: regulation of apoptotic process (GO:0042981);; Biological Process: regulation of angiogenesis (GO:0045765);; Biological Process: nuclear import (GO:0051170);;	K17290|5.89967e-111|gga:424363|K17290 oxidoreductase [EC:1.1.1.-] | (RefSeq) HTATIP2; HIV-1 Tat interactive protein 2	--	[T]	Signal transduction mechanisms	NADH(P)-binding;; Semialdehyde dehydrogenase, NAD binding domain	--	T	Signal transduction mechanisms	PREDICTED: oxidoreductase HTATIP2 isoform X2 [Gallus gallus]
gene12289	197	317	390	473	308	1871	2725	2551	2936	1819	1.0834	1.52507	2.18289	2.41779	1.90603	14.7111	16.6401	15.5455	22.4432	12.3786	8.61806e-16	3.37542	up	--	--	Biological Process: cell adhesion (GO:0007155);; Cellular Component: membrane (GO:0016020);; Molecular Function: carbohydrate binding (GO:0030246);;	K06496|0|gga:424364|K06496 selectin, platele | (RefSeq) SELP; selectin P	Cell adhesion molecules (CAMs) (ko04514)	[TV]	Signal transduction mechanisms;; Defense mechanisms	Sushi domain (SCR repeat);; Lectin C-type domain;; Complement Clr-like EGF-like;; EGF-like domain;; EGF-like domain	Sushi repeat-containing protein SRPX2 (Precursor) GN=srpx2 OS=Xenopus laevis (African clawed frog) PE=2 SV=1	T	Signal transduction mechanisms	PREDICTED: P-selectin isoform X6 [Gallus gallus]
gene12343	1215	444	992	1523	880	7582	6687	5993	5898	7001	4.48183	1.78222	3.87949	4.73574	3.04015	32.0112	22.546	23.6613	26.0528	25.5843	1.39424e-30	3.24427	up	--	--	Molecular Function: methyltransferase activity (GO:0008168);;	K19579|0|gga:429066|K19579 protein N-terminal monomethyltransferase [EC:2.1.1.299] | (RefSeq) METTL11B, C1orf184; methyltransferase like 11B	--	[R]	General function prediction only	AdoMet dependent proline di-methyltransferase;; Methyltransferase domain	Alpha N-terminal protein methyltransferase 1B GN=mettl11b OS=Danio rerio (Zebrafish) PE=3 SV=2	R	General function prediction only	PREDICTED: alpha N-terminal protein methyltransferase 1B isoform X4 [Gallus gallus]
gene12351	373	358	438	474	352	570	678	591	556	531	4.56194	4.44394	4.88204	4.74926	4.45296	9.36127	7.49538	7.60595	8.2682	6.52825	0.01717	1.07746	up	--	--	--	--	--	[R]	General function prediction only	Putative methyltransferase;; Methyltransferase domain;; Methyltransferase domain;; Methyltransferase domain;; Methyltransferase small domain;; Ribosomal protein L11 methyltransferase (PrmA)	--	R	General function prediction only	PREDICTED: histidine protein methyltransferase 1 homolog [Gallus gallus]
gene12356	6452	4761	5442	4986	5068	7422	9510	6863	6839	7286	27.4927	17.2651	19.8636	15.9978	20.2255	37.1442	35.0531	26.2956	34.5005	29.1588	0.00288163	1.00455	up	--	--	Biological Process: vasculature development (GO:0001944);; Molecular Function: transcription factor activity, sequence-specific DNA binding (GO:0003700);; Molecular Function: protein binding (GO:0005515);; Cellular Component: nucleus (GO:0005634);; Cellular Component: transcription factor complex (GO:0005667);; Biological Process: nervous system development (GO:0007399);; Biological Process: neur…	K09355|0|ssc:100154639|K09355 pre-B-cell leukemia transcription factor 1 | (RefSeq) PBX1; PBX homeobox 1	Transcriptional misregulation in cancer (ko05202)	[K]	Transcription	PBC domain;; Homeobox domain;; Homeobox KN domain	Pre-B-cell leukemia transcription factor 1 {ECO:0000250|UniProtKB:P40424} OS=Xenopus tropicalis (Western clawed frog) PE=2 SV=1	K	Transcription	PREDICTED: pre-B-cell leukemia transcription factor 1 isoform X2 [Cuculus canorus]
gene12425	12160	8442	15004	8874	12575	17910	23889	19837	13038	12276	20.7398	13.1234	23.0329	11.9669	20.9543	36.0138	35.2759	33.6603	26.2156	20.7587	0.00173327	1.10607	up	[R]	General function prediction only	Molecular Function: nucleic acid binding (GO:0003676);; Cellular Component: nucleus (GO:0005634);; Molecular Function: metal ion binding (GO:0046872);;	K10509|0|gga:429073|K10509 zinc finger and BTB domain-containing protein 37 | (RefSeq) ZBTB37; zinc finger and BTB domain containing 37	--	[R]	General function prediction only	BTB/POZ domain;; Zinc-finger double domain;; Zinc finger, C2H2 type;; C2H2-type zinc finger	Hypermethylated in cancer 1 protein (Fragment) GN=HIC1 OS=Gallus gallus (Chicken) PE=2 SV=2	R	General function prediction only	PREDICTED: zinc finger and BTB domain-containing protein 37 isoform X3 [Gallus gallus]
gene12474	3837	2231	4673	1012	1097	2766	5457	4956	2716	3658	15.2245	8.64027	15.8525	4.01279	4.69358	12.2172	18.8102	18.7098	12.0762	13.9681	0.0238426	1.07746	up	--	--	Molecular Function: nucleotide binding (GO:0000166);; Molecular Function: nucleic acid binding (GO:0003676);; Cellular Component: U12-type spliceosomal complex (GO:0005689);;	K13157|0|gga:424458|K13157 U11/U12 small nuclear ribonucleoprotein 65 kDa protein | (RefSeq) RNPC3; RNA binding region (RNP1, RRM) containing 3	--	[A]	RNA processing and modification	RNA recognition motif. (a.k.a. RRM, RBD, or RNP domain);; RNA recognition motif (a.k.a. RRM, RBD, or RNP domain);; RNA recognition motif. (a.k.a. RRM, RBD, or RNP domain)	--	A	RNA processing and modification	PREDICTED: RNA-binding protein 40 isoform X10 [Gallus gallus]
gene12498	1053	768	934	1357	744	1549	1843	1555	1661	1338	5.72159	4.17457	5.2585	5.75597	4.56114	8.70799	8.17108	8.19171	8.72043	7.34191	6.20452e-05	1.2476	up	--	--	Cellular Component: cytoplasm (GO:0005737);; Cellular Component: microtubule organizing center (GO:0005815);; Biological Process: cell cycle (GO:0007049);;	K16487|0|gga:424471|K16487 spindle assembly abnormal protein 6 | (RefSeq) SASS6; SAS-6 centriolar assembly protein	--	--	--	--	Spindle assembly abnormal protein 6 homolog GN=SASS6 OS=Gallus gallus (Chicken) PE=2 SV=1	S	Function unknown	spindle assembly abnormal protein 6 homolog [Gallus gallus]
gene12501	2192	1739	2241	2461	2300	4738	5709	6346	4278	3992	3.27029	2.06725	2.6052	2.60769	2.84167	8.79287	7.01334	8.73428	7.79805	5.53133	1.70534e-09	1.71172	up	--	--	--	--	--	--	--	Reeler domain	Putative ferric-chelate reductase 1 GN=frrs1 OS=Danio rerio (Zebrafish) PE=2 SV=1	T	Signal transduction mechanisms	PREDICTED: hornerin-like isoform X2 [Gallus gallus]
gene12502	85280	64612	90226	65517	70435	151941	197748	181657	133590	91434	273.974	188.263	262.064	167.061	215.201	581.345	556.129	586.618	511.116	289.593	1.40758e-05	1.52267	up	[G]	Carbohydrate transport and metabolism	--	K01196|0|mgp:100551267|K01196 glycogen debranching enzyme [EC:2.4.1.25 3.2.1.33] | (RefSeq) AGL; amylo-alpha-1, 6-glucosidase, 4-alpha-glucanotransferase	Starch and sucrose metabolism (ko00500)	[G]	Carbohydrate transport and metabolism	glucanotransferase domain of human glycogen debranching enzyme;; Amylo-alpha-1,6-glucosidase;; central domain of human glycogen debranching enzyme;; N-terminal domain from the human glycogen debranching enzyme;; Alpha amylase, catalytic domain	--	G	Carbohydrate transport and metabolism	PREDICTED: glycogen debranching enzyme [Pygoscelis adeliae]
gene12508	33	65	50	20	49	42	137	116	88	49	0.098768	0.182273	0.137231	0.048481	0.146646	0.149365	0.364205	0.351666	0.318003	0.149545	0.0445509	1.4765	up	--	--	Molecular Function: catalytic activity (GO:0003824);; Cellular Component: membrane (GO:0016020);;	K19582|0|gga:424476|K19582 lipid phosphate phosphatase-related protein type 3/4 | (RefSeq) PLPPR4, D3BWG0562E, LPPR4; phospholipid phosphatase related 4	--	[I]	Lipid transport and metabolism	PAP2 superfamily	Lipid phosphate phosphatase-related protein type 5 GN=lppr5 OS=Xenopus laevis (African clawed frog) PE=2 SV=2	I	Lipid transport and metabolism	PREDICTED: lipid phosphate phosphatase-related protein type 4 isoform X3 [Gallus gallus]
gene12519	642	544	670	404	486	1062	960	798	730	849	2.64111	1.91685	2.7959	1.07092	1.87927	4.94415	3.95776	3.40253	4.16596	3.15168	0.00116395	1.18776	up	--	--	Cellular Component: integral component of membrane (GO:0016021);;	--	--	[TR]	Signal transduction mechanisms;; General function prediction only	TLC domain	Transmembrane protein 56-B GN=tmem56-b OS=Xenopus laevis (African clawed frog) PE=2 SV=1	T	Signal transduction mechanisms	transmembrane protein 56 [Gallus gallus]
gene12522	258	257	288	257	317	554	515	475	415	693	1.98439	1.61939	1.89897	1.39168	2.07065	3.94322	3.00118	3.57572	2.68412	4.0656	0.000866396	1.43761	up	--	--	Cellular Component: integral component of membrane (GO:0016021);;	K15282|0|gga:424486|K15282 solute carrier family 44 (choline transporter-like protein), member 3 | (RefSeq) SLC44A3; solute carrier family 44 member 3	--	[I]	Lipid transport and metabolism	Plasma-membrane choline transporter	Choline transporter-like protein 1 GN=slc44a1 OS=Xenopus laevis (African clawed frog) PE=2 SV=2	P	Inorganic ion transport and metabolism	PREDICTED: solute carrier family 44, member 3 isoform X8 [Gallus gallus]
gene12565	280	294	256	243	212	452	527	539	310	262	1.04057	0.996023	0.855582	0.714353	0.77055	1.98245	1.69514	1.99594	1.35808	0.966116	0.0155524	1.21602	up	--	--	--	--	--	[R]	General function prediction only	Leucine-rich repeat containing protein 8;; Leucine rich repeat;; Leucine Rich repeats (2 copies);; Leucine Rich Repeat;; Leucine rich repeats (6 copies)	Volume-regulated anion channel subunit LRRC8E GN=lrrc8e OS=Xenopus tropicalis (Western clawed frog) PE=2 SV=1	S	Function unknown	PREDICTED: leucine-rich repeat-containing protein 8B isoform X1 [Gallus gallus]
gene1281	3200	2544	3187	3009	2425	4409	5500	4056	3499	2927	14.4018	10.4362	12.916	10.707	10.6632	23.3998	21.4364	18.1679	18.5723	13.3271	0.00119638	1.02322	up	[U]	Intracellular trafficking, secretion, and vesicular transport	Cellular Component: nucleus (GO:0005634);; Cellular Component: cytoplasm (GO:0005737);; Molecular Function: protein transporter activity (GO:0008565);; Cellular Component: dendrite (GO:0030425);; Biological Process: positive regulation of protein import into nucleus (GO:0042307);;	K15042|0|mgp:100551399|K15042 importin subunit alpha-1 | (RefSeq) importin subunit alpha-5	Influenza A (ko05164)	[U]	Intracellular trafficking, secretion, and vesicular transport	Armadillo/beta-catenin-like repeat;; Importin beta binding domain;; HEAT repeats;; HEAT-like repeat;; HEAT repeat;; Armadillo-like	Importin subunit alpha-5 GN=KPNA1 OS=Gallus gallus (Chicken) PE=2 SV=1	U	Intracellular trafficking, secretion, and vesicular transport	importin subunit alpha-5 [Gallus gallus]
gene1282	4380	2750	4099	5988	5272	6500	9155	7445	7741	6283	22.1999	12.5534	19.1956	23.4224	26.525	39.1154	45.4455	37.9545	47.3395	32.5732	0.000116038	1.2433	up	--	--	Molecular Function: ubiquitin-protein transferase activity (GO:0004842);; Cellular Component: nucleus (GO:0005634);; Cellular Component: cytoplasm (GO:0005737);; Cellular Component: centrosome (GO:0005813);; Molecular Function: zinc ion binding (GO:0008270);; Biological Process: protein ubiquitination (GO:0016567);; Biological Process: muscle cell differentiation (GO:0042692);;	K10315|0|gga:426341|K10315 F-box protein 40 | (RefSeq) FBXO40; F-box protein 40	--	--	--	--	--	R	General function prediction only	PREDICTED: F-box only protein 40 [Gallus gallus]
gene12821	14067	8636	15266	13496	11895	20602	26217	23594	19981	12066	27.8299	15.571	27.192	21.1095	22.9937	48.0502	44.9082	46.4434	46.6053	23.7257	0.000681248	1.2217	up	[O]	Posttranslational modification, protein turnover, chaperones	--	K11840|0|phi:102110963|K11840 ubiquitin carboxyl-terminal hydrolase 9/24 [EC:3.4.19.12] | (RefSeq) USP24; ubiquitin specific peptidase 24	--	[O]	Posttranslational modification, protein turnover, chaperones	Ubiquitin carboxyl-terminal hydrolase;; Ubiquitin carboxyl-terminal hydrolase	Ubiquitin carboxyl-terminal hydrolase 47 GN=usp47 OS=Xenopus tropicalis (Western clawed frog) PE=2 SV=1	O	Posttranslational modification, protein turnover, chaperones	PREDICTED: LOW QUALITY PROTEIN: ubiquitin carboxyl-terminal hydrolase 24 [Pseudopodoces humilis]
gene1284	272	165	223	169	151	390	288	328	456	232	1.90187	0.834913	1.65643	1.07258	1.21774	2.30527	1.32061	2.28759	1.90133	1.86047	0.0195853	1.34179	up	--	--	Cellular Component: mitochondrion (GO:0005739);; Cellular Component: integral component of membrane (GO:0016021);; Biological Process: vesicle-mediated transport (GO:0016192);; Cellular Component: cell junction (GO:0030054);; Cellular Component: synaptic vesicle membrane (GO:0030672);; Cellular Component: neuron projection (GO:0043005);;	K08510|2.91122e-43|gga:418273|K08510 vesicle-associated membrane protein 1 | (RefSeq) VAMP1; vesicle-associated membrane protein 1 (synaptobrevin 1)	SNARE interactions in vesicular transport (ko04130)	[U]	Intracellular trafficking, secretion, and vesicular transport	Synaptobrevin	Synaptobrevin OS=Torpedo californica (Pacific electric ray) PE=2 SV=1	U	Intracellular trafficking, secretion, and vesicular transport	vesicle-associated membrane protein 1 (synaptobrevin 1) [Gallus gallus]
gene12868	346	273	395	331	278	439	753	541	357	493	2.69529	1.54639	2.63155	1.96896	2.06828	4.09289	5.59126	4.21759	3.19086	4.0287	0.0100016	1.15799	up	--	--	--	--	--	[T]	Signal transduction mechanisms	EF-hand domain pair;; EF hand;; EF-hand domain pair;; EF-hand domain	EF-hand calcium-binding domain-containing protein 7 GN=efcab7 OS=Xenopus laevis (African clawed frog) PE=2 SV=1	T	Signal transduction mechanisms	PREDICTED: EF-hand calcium-binding domain-containing protein 7 isoform X1 [Gallus gallus]
gene12869	140005	145926	147150	120987	100906	360117	409581	359995	301747	323844	1179.39	1120.13	1115.66	806.173	831.003	3571.93	2980.12	3013.15	2992.68	2700.52	6.22647e-09	1.93415	up	[G]	Carbohydrate transport and metabolism	--	K01835|0|apla:101790428|K01835 phosphoglucomutase [EC:5.4.2.2] | (RefSeq) PGM1; phosphoglucomutase 1	Glycolysis / Gluconeogenesis (ko00010);; Pentose phosphate pathway (ko00030);; Galactose metabolism (ko00052);; Purine metabolism (ko00230);; Starch and sucrose metabolism (ko00500);; Amino sugar and nucleotide sugar metabolism (ko00520)	[G]	Carbohydrate transport and metabolism	Phosphoglucomutase/phosphomannomutase, alpha/beta/alpha domain I;; Phosphoglucomutase/phosphomannomutase, alpha/beta/alpha domain III;; Phosphoglucomutase/phosphomannomutase, alpha/beta/alpha domain II;; Phosphoglucomutase/phosphomannomutase, C-terminal domain	--	G	Carbohydrate transport and metabolism	Phosphoglucomutase-1, partial [Haliaeetus albicilla]
gene1289	13	86	13	37	30	38	138	125	107	159	0.257386	1.54875	0.221421	0.57422	0.58025	0.8901	2.37727	2.46194	2.50539	3.13288	0.000987398	2.13857	up	--	--	Molecular Function: hormone activity (GO:0005179);; Cellular Component: extracellular region (GO:0005576);; Biological Process: regulation of blood vessel size (GO:0050880);;	--	--	--	--	Atrial natriuretic peptide	--	--	--	C-type natriuretic peptide 1 precursor [Gallus gallus]
gene13025	427	773	536	457	449	947	1170	1029	703	983	3.6784	6.12155	4.09486	3.24818	3.31226	9.87499	8.941	8.27413	7.2842	8.80825	5.9995e-05	1.36957	up	--	--	Cellular Component: Golgi apparatus (GO:0005794);; Cellular Component: integral component of membrane (GO:0016021);;	--	--	--	--	EamA-like transporter family	Solute carrier family 35 member G2 GN=SLC35G2 OS=Gallus gallus (Chicken) PE=2 SV=1	S	Function unknown	solute carrier family 35 member G2 [Gallus gallus]
gene13027	7738	8773	7654	10099	7314	12418	14489	11602	10123	10109	40.887	42.2933	36.4196	42.2139	37.7905	77.3553	66.1859	60.9404	63.084	53.0675	0.00479924	1.02019	up	--	--	--	--	--	--	--	--	--	S	Function unknown	uncharacterized protein LOC424740 [Gallus gallus]
gene13065	738	631	1157	587	788	825	1482	1915	968	765	1.36555	0.870957	1.66836	1.0243	1.57048	2.21935	2.9408	3.2229	2.62514	1.72706	0.0418891	1.11188	up	--	--	Molecular Function: phospholipid binding (GO:0005543);; Molecular Function: protein domain specific binding (GO:0019904);; Biological Process: lamellipodium assembly (GO:0030032);; Molecular Function: Rac guanyl-nucleotide exchange factor activity (GO:0030676);; Biological Process: regulation of Rho protein signal transduction (GO:0035023);; Biological Process: filopodium assembly (GO:0046847);;	K05769|0|gga:424761|K05769 Rho guanine nucleotide exchange factor 4/29 | (RefSeq) ARHGEF4; Rho guanine nucleotide exchange factor 4	Regulation of actin cytoskeleton (ko04810)	[T]	Signal transduction mechanisms	RhoGEF domain;; Variant SH3 domain;; PH domain;; SH3 domain;; Variant SH3 domain	Rho guanine nucleotide exchange factor 6 GN=ARHGEF6 OS=Gallus gallus (Chicken) PE=2 SV=1	T	Signal transduction mechanisms	PREDICTED: uro-adherence factor A isoform X8 [Gallus gallus]
gene13086	3021	2865	3429	2679	3152	4858	6340	4214	3843	4495	10.6296	9.18008	9.99629	6.88275	10.6606	21.7901	19.7391	14.4767	14.6125	14.261	0.000151773	1.14556	up	[OC]	Posttranslational modification, protein turnover, chaperones;; Energy production and conversion	Molecular Function: zinc ion binding (GO:0008270);;	K20178|0|gga:429138|K20178 vacuolar protein sorting-associated protein 8 | (RefSeq) VPS8; VPS8, CORVET complex subunit	--	[U]	Intracellular trafficking, secretion, and vesicular transport	Golgi CORVET complex core vacuolar protein 8;; Region in Clathrin and VPS;; Thioredoxin	Thioredoxin GN=TXN OS=Gallus gallus (Chicken) PE=3 SV=2	U	Intracellular trafficking, secretion, and vesicular transport	PREDICTED: vacuolar protein sorting-associated protein 8 homolog isoform X2 [Gallus gallus]
gene13092	279	277	292	222	349	301	299	415	336	784	3.36018	3.08969	3.22126	2.75877	4.78705	3.83301	2.55948	4.92527	4.67329	9.41707	0.0300865	1.04586	up	[S]	Function unknown	--	--	--	[S]	Function unknown	SNARE associated Golgi protein	Transmembrane protein 41A-B {ECO:0000312|EMBL:AAH68328.1} (Precursor) OS=Danio rerio (Zebrafish) PE=2 SV=1	S	Function unknown	transmembrane protein 41A isoform 1 [Gallus gallus]
gene1312	99210	136872	106564	112839	83506	212271	297278	276331	228214	253193	1553.93	1954.05	1502.31	1397.35	1277.92	3919.77	4031.43	4306.07	4214.44	3931.66	2.85837e-07	1.74249	up	[G]	Carbohydrate transport and metabolism	Molecular Function: triose-phosphate isomerase activity (GO:0004807);; Cellular Component: cytosol (GO:0005829);; Biological Process: gluconeogenesis (GO:0006094);; Biological Process: glycolytic process (GO:0006096);; Biological Process: pentose-phosphate shunt (GO:0006098);; Biological Process: embryo development (GO:0009790);; Biological Process: glyceraldehyde-3-phosphate metabolic process (G…	K01803|0|gga:396435|K01803 triosephosphate isomerase (TIM) [EC:5.3.1.1] | (RefSeq) TPI1; triosephosphate isomerase 1	Glycolysis / Gluconeogenesis (ko00010);; Fructose and mannose metabolism (ko00051);; Inositol phosphate metabolism (ko00562);; Carbon metabolism (ko01200);; Biosynthesis of amino acids (ko01230)	[G]	Carbohydrate transport and metabolism	Triosephosphate isomerase	Triosephosphate isomerase GN=TPI1 OS=Gallus gallus (Chicken) PE=1 SV=2	G	Carbohydrate transport and metabolism	triosephosphate isomerase [Gallus gallus]
gene13305	95	95	6	28	65	202	159	111	207	252	1.01675	0.981002	0.060779	0.237598	0.467602	2.5657	1.3415	1.3255	2.52373	3.41743	0.000256119	2.15585	up	[M]	Cell wall/membrane/envelope biogenesis	Biological Process: response to reactive oxygen species (GO:0000302);; Molecular Function: transporter activity (GO:0005215);; Cellular Component: extracellular space (GO:0005615);; Biological Process: glucose metabolic process (GO:0006006);; Biological Process: negative regulation of platelet-derived growth factor receptor signaling pathway (GO:0010642);; Molecular Function: cholesterol binding …	K03098|6.53586e-129|gga:424893|K03098 apolipoprotein D and lipocalin family protein | (RefSeq) APOD, lipocalin; apolipoprotein D	--	[M]	Cell wall/membrane/envelope biogenesis	Lipocalin-like domain;; Lipocalin / cytosolic fatty-acid binding protein family;; Triabin	Purpurin (Precursor) OS=Gallus gallus (Chicken) PE=1 SV=1	M	Cell wall/membrane/envelope biogenesis	apolipoprotein D precursor [Gallus gallus]
gene13306	6412	7245	6347	5865	5595	10655	13848	11632	8767	12273	61.0104	63.5445	54.3433	44.2556	52.0317	118.994	113.814	110.187	98.1818	116.559	2.30334e-05	1.35412	up	--	--	Molecular Function: protein phosphatase inhibitor activity (GO:0004864);; Biological Process: regulation of signal transduction (GO:0009966);; Biological Process: regulation of phosphoprotein phosphatase activity (GO:0043666);;	K16833|1.52693e-100|gga:424894|K16833 protein phosphatase inhibitor 2 | (RefSeq) PPP1R2; protein phosphatase 1 regulatory inhibitor subunit 2	--	[OT]	Posttranslational modification, protein turnover, chaperones;; Signal transduction mechanisms	Protein phosphatase inhibitor 2 (IPP-2)	--	T	Signal transduction mechanisms	protein phosphatase inhibitor 2 [Gallus gallus]
gene13338	193	246	538	324	296	385	618	739	385	559	0.749951	0.838442	1.76594	0.947181	1.04453	1.72096	2.02235	3.04375	1.65607	2.04279	0.0045733	1.25641	up	--	--	--	K10149|0|apla:101794454|K10149 tumor protein p63 | (RefSeq) TP63; tumor protein p63	--	--	--	P53 DNA-binding domain;; P53 tetramerisation motif;; SAM domain (Sterile alpha motif)	Cellular tumor antigen p53 GN=tp53 OS=Oncorhynchus mykiss (Rainbow trout) PE=2 SV=1	K	Transcription	PREDICTED: tumor protein 63 isoform X1 [Meleagris gallopavo]
gene13401	1593	1359	1863	2403	1994	3582	3690	3166	2481	3258	7.14278	5.47283	7.59555	8.35965	8.39906	18.5863	14.0141	13.8228	12.8267	13.9484	3.33715e-06	1.32895	up	[E]	Amino acid transport and metabolism	--	K09605|0|gga:424946|K09605 arginyl aminopeptidase-like 1 [EC:3.4.11.-] | (RefSeq) RNPEPL1; arginyl aminopeptidase like 1	--	[IOVE]	Lipid transport and metabolism;; Posttranslational modification, protein turnover, chaperones;; Defense mechanisms;; Amino acid transport and metabolism	Peptidase family M1;; Leukotriene A4 hydrolase, C-terminal;; Peptidase MA superfamily	Aminopeptidase N {ECO:0000312|EMBL:ACZ95799.1} GN=ANPEP OS=Gallus gallus (Chicken) PE=1 SV=1	EIOV	Amino acid transport and metabolism;; Lipid transport and metabolism;; Posttranslational modification, protein turnover, chaperones;; Defense mechanisms	PREDICTED: arginyl aminopeptidase (aminopeptidase B)-like 1, partial [Gallus gallus]
gene13478	2386	2957	3078	4315	3596	8328	16810	5404	8519	3946	8.12282	9.35706	9.6084	11.7862	12.1349	33.664	50.1053	19.2603	34.4454	13.3151	0.0129065	1.91857	up	[I]	Lipid transport and metabolism	Molecular Function: carboxylic ester hydrolase activity (GO:0004091);; Biological Process: protein dephosphorylation (GO:0006470);; Biological Process: xenobiotic metabolic process (GO:0006805);; Cellular Component: integral component of membrane (GO:0016021);; Molecular Function: serine hydrolase activity (GO:0017171);; Molecular Function: phosphate ion binding (GO:0042301);;	K14349|0|gga:429158|K14349 neutral cholesterol ester hydrolase 1 [EC:3.1.1.-] | (RefSeq) NCEH1, AADACL1; neutral cholesterol ester hydrolase 1	--	[V]	Defense mechanisms	alpha/beta hydrolase fold	--	V	Defense mechanisms	PREDICTED: neutral cholesterol ester hydrolase 1 [Gallus gallus]
gene13590	9392	17452	19543	17991	17698	27689	33500	26072	22573	13018	41.3815	70.8517	77.6983	62.017	76.7569	131.172	114.303	105.63	107.266	57.6635	0.00940866	1.1225	up	--	--	Biological Process: regulation of alternative mRNA splicing, via spliceosome (GO:0000381);; Molecular Function: double-stranded RNA binding (GO:0003725);; Cellular Component: nucleus (GO:0005634);; Biological Process: mRNA splice site selection (GO:0006376);; Biological Process: skeletal muscle tissue development (GO:0007519);; Cellular Component: cytoplasmic stress granule (GO:0010494);; Molecul…	K14943|2.8479e-86|tgu:100218825|K14943 muscleblind | (RefSeq) MBNL1; muscleblind like splicing regulator 1	--	[K]	Transcription	--	Muscleblind-like protein 1 GN=MBNL1 OS=Gallus gallus (Chicken) PE=2 SV=1	A	RNA processing and modification	PREDICTED: LOW QUALITY PROTEIN: muscleblind-like protein 1 [Tinamus guttatus]
gene13601	588	394	682	558	477	1338	1516	1479	1391	1301	3.64587	2.35766	4.1543	2.93179	3.10099	10.2357	8.58734	9.21771	9.86383	8.10313	2.87422e-10	1.90119	up	--	--	--	K04299|0|gga:101749627|K04299 purinergic receptor P2Y, G protein-coupled, 14 | (RefSeq) P2RY14; purinergic receptor P2Y, G-protein coupled, 14	Neuroactive ligand-receptor interaction (ko04080)	--	--	7 transmembrane receptor (rhodopsin family)	G-protein coupled receptor 183 GN=gpr183 OS=Salmo salar (Atlantic salmon) PE=2 SV=1	T	Signal transduction mechanisms	PREDICTED: P2Y purinoceptor 14 [Gallus gallus]
gene13603	76	16	38	64	40	76	130	120	107	71	0.53048	0.097406	0.240639	0.354995	0.27191	0.631173	0.793211	0.829271	0.891584	0.496265	0.0244625	1.61893	up	--	--	Cellular Component: plasma membrane (GO:0005886);; Cellular Component: microvillus (GO:0005902);; Biological Process: actin filament organization (GO:0007015);; Biological Process: sensory perception of sound (GO:0007605);; Biological Process: positive regulation of lamellipodium assembly (GO:0010592);; Cellular Component: lamellipodium (GO:0030027);; Biological Process: photoreceptor cell mainte…	--	--	--	--	--	--	S	Function unknown	PREDICTED: clarin-1 isoform X3 [Gallus gallus]
gene13605	88	37	78	182	32	146	265	132	148	147	0.259768	0.097377	0.204397	0.418635	0.089041	0.499059	0.667063	0.381516	0.505996	0.423465	0.0212476	1.5539	up	--	--	--	--	--	[S]	Function unknown	Domain of unknown function (DUF4205);; Domain of unknown function (DUF4205)	Protein FAM188B GN=fam188b OS=Xenopus tropicalis (Western clawed frog) PE=2 SV=1	S	Function unknown	PREDICTED: protein FAM188B2-like isoform X2 [Gallus gallus]
gene13715	28726	31754	40117	31757	40009	55126	58187	51922	43016	46517	95.4301	94.454	118.245	86.3584	130.592	216.81	169.75	170.446	170.237	155.376	0.00525379	1.07501	up	--	--	Molecular Function: protein serine/threonine kinase activity (GO:0004674);; Molecular Function: ATP binding (GO:0005524);; Cellular Component: nucleus (GO:0005634);; Biological Process: protein phosphorylation (GO:0006468);; Biological Process: heart development (GO:0007507);;	K08868|0|gga:768936|K08868 alpha-kinase | (RefSeq) ALPK3; alpha kinase 3	--	--	--	Alpha-kinase family;; Immunoglobulin I-set domain;; Immunoglobulin domain;; Immunoglobulin V-set domain;; Immunoglobulin domain	Telokin OS=Meleagris gallopavo (Common turkey) PE=1 SV=1	T	Signal transduction mechanisms	PREDICTED: alpha-protein kinase 3 isoform X3 [Gallus gallus]
gene13746	186583	178479	194392	244754	147671	588932	819075	655533	597732	525911	1620.04	1388.51	1572.85	1713.84	1219.8	6103.29	6234.32	6000.12	5662.9	4495.37	1.36218e-12	2.26884	up	[G]	Carbohydrate transport and metabolism	Molecular Function: magnesium ion binding (GO:0000287);; Molecular Function: pyruvate kinase activity (GO:0004743);; Molecular Function: ATP binding (GO:0005524);; Cellular Component: cytosol (GO:0005829);; Biological Process: glycolytic process (GO:0006096);; Molecular Function: potassium ion binding (GO:0030955);; Biological Process: small molecule metabolic process (GO:0044281);;	K00873|0|gga:396456|K00873 pyruvate kinase [EC:2.7.1.40] | (RefSeq) PKM, PKLR, PKM2; pyruvate kinase, muscle	Glycolysis / Gluconeogenesis (ko00010);; Purine metabolism (ko00230);; Pyruvate metabolism (ko00620);; Carbon metabolism (ko01200);; Biosynthesis of amino acids (ko01230)	[G]	Carbohydrate transport and metabolism	Pyruvate kinase, barrel domain;; Pyruvate kinase, alpha/beta domain	Pyruvate kinase PKM GN=PKM OS=Gallus gallus (Chicken) PE=2 SV=2	G	Carbohydrate transport and metabolism	pyruvate kinase PKM [Gallus gallus]
gene1379	4967	4080	5900	6405	5976	16072	8853	17682	9740	12172	15.4907	14.5674	17.2734	17.2548	22.308	81.4549	23.2435	77.8113	48.3805	45.7638	0.000144053	1.77315	up	--	--	--	--	--	[S]	Function unknown	Domain of unknown function (DUF1693)	Protein FAM46C GN=FAM46C OS=Gallus gallus (Chicken) PE=2 SV=1	S	Function unknown	protein FAM46C [Gallus gallus]
gene13829	4726	5829	5373	5876	4489	8290	10613	8894	8004	8176	28.2652	31.7797	28.9234	27.7869	26.2298	58.4548	54.9589	52.9263	56.4455	48.4831	0.000115295	1.25918	up	[S]	Function unknown	Biological Process: protein polyubiquitination (GO:0000209);; Cellular Component: nucleus (GO:0005634);; Cellular Component: cytoplasm (GO:0005737);; Biological Process: nucleocytoplasmic transport (GO:0006913);; Biological Process: cellular response to starvation (GO:0009267);; Biological Process: regulation of myotube differentiation (GO:0010830);; Biological Process: positive regulation of pro…	K10302|0|gga:415355|K10302 F-box protein 22 | (RefSeq) FBXO22, null; F-box protein 22	--	--	--	FIST C domain;; F-box domain	--	R	General function prediction only	F-box only protein 22 [Gallus gallus]
gene13852	2175	3827	2726	2860	2711	3714	6576	6004	4832	7347	69.4574	111.396	78.3628	72.2177	84.5687	139.825	181.828	190.771	181.94	232.613	2.45597e-07	1.47832	up	[J]	Translation, ribosomal structure and biogenesis	Molecular Function: structural constituent of ribosome (GO:0003735);; Cellular Component: ribosome (GO:0005840);; Biological Process: translation (GO:0006412);; Molecular Function: metal ion binding (GO:0046872);;	K02978|2.36414e-46|gga:415372|K02978 small subunit ribosomal protein S27e | (RefSeq) RPS27L; ribosomal protein S27 like	Ribosome (ko03010)	[J]	Translation, ribosomal structure and biogenesis	Ribosomal protein S27	40S ribosomal protein S27 GN=rps27 OS=Xenopus laevis (African clawed frog) PE=3 SV=2	J	Translation, ribosomal structure and biogenesis	40S ribosomal protein S27-like [Gallus gallus]
gene13854	475956	727256	562865	771235	394374	726334	963053	878586	868828	929142	4192.33	5981.84	4745.34	5533	3154.01	7250.9	6941.34	6882.87	7602.55	7615.47	0.00179822	1.1022	up	--	--	Molecular Function: actin binding (GO:0003779);; Cellular Component: cytoplasm (GO:0005737);; Cellular Component: cytoskeleton (GO:0005856);;	--	--	[Z]	Cytoskeleton	Tropomyosin;; Tropomyosin like;; Laminin Domain II	Tropomyosin alpha-1 chain GN=TPM1 OS=Coturnix coturnix japonica (Japanese quail) PE=2 SV=1	Z	Cytoskeleton	alpha-tropomyosin [Coturnix coturnix]
gene13950	1978	1714	1398	2793	1260	4053	4680	2105	3867	3653	12.857	11.0864	8.19016	14.4741	8.02498	30.1383	26.6267	13.5298	28.6222	22.8543	4.96691e-05	1.54201	up	--	--	--	--	--	--	--	Domain of unknown function (DUF758)	Tumor necrosis factor alpha-induced protein 8-like protein 3 GN=tnfaip8l3 OS=Xenopus laevis (African clawed frog) PE=2 SV=1	R	General function prediction only	PREDICTED: tumor necrosis factor, alpha-induced protein 8-like 3 [Gallus gallus]
gene1396	669	313	565	623	426	1293	1601	1147	483	1019	1.01414	0.369528	0.922838	0.79705	0.923494	2.08892	2.93235	1.64971	0.886774	1.43382	0.000419017	1.58287	up	[R]	General function prediction only	Molecular Function: DNA binding (GO:0003677);; Molecular Function: DNA-directed DNA polymerase activity (GO:0003887);; Molecular Function: ATP binding (GO:0005524);; Biological Process: DNA replication (GO:0006260);; Molecular Function: ATP-dependent helicase activity (GO:0008026);;	K02349|0|gga:418326|K02349 DNA polymerase theta [EC:2.7.7.7] | (RefSeq) POLQ; DNA polymerase theta	--	[R]	General function prediction only	DNA polymerase family A;; DEAD/DEAH box helicase;; Helicase conserved C-terminal domain;; Helix-hairpin-helix domain	Probable ATP-dependent DNA helicase HFM1 GN=hfm1 OS=Xenopus tropicalis (Western clawed frog) PE=2 SV=1	L	Replication, recombination and repair	PREDICTED: DNA polymerase theta isoform X2 [Gallus gallus]
gene1397	379	117	296	207	206	908	1567	818	248	521	1.64541	0.452054	1.17544	0.706621	1.00036	4.78103	7.05399	4.1606	1.21041	3.17287	0.00886819	2.21077	up	--	--	--	K08518|0|gga:418327|K08518 syntaxin-binding protein 5 | (RefSeq) STXBP5L; syntaxin binding protein 5 like	--	[U]	Intracellular trafficking, secretion, and vesicular transport	LLGL2;; WD domain, G-beta repeat;; Lethal giant larvae(Lgl) like, C-terminal	Syntaxin-binding protein 5-like GN=stxbp5l OS=Danio rerio (Zebrafish) PE=3 SV=1	U	Intracellular trafficking, secretion, and vesicular transport	PREDICTED: syntaxin-binding protein 5-like isoform X1 [Meleagris gallopavo]
gene14073	5	11	11	13	0	146	442	432	169	110	0.011416	0.026013	0.026622	0.026987	0	0.478538	1.06857	1.58766	0.554153	0.305	1.53872e-07	5.56576	up	[GEPR]	Carbohydrate transport and metabolism;; Amino acid transport and metabolism;; Inorganic ion transport and metabolism;; General function prediction only	Cellular Component: synaptic vesicle (GO:0008021);; Cellular Component: integral component of membrane (GO:0016021);; Molecular Function: transmembrane transporter activity (GO:0022857);; Biological Process: transmembrane transport (GO:0055085);;	K06258|0|gga:427508|K06258 MFS transporter, VNT family, synaptic vesicle glycoprotein 2 | (RefSeq) SV2B; synaptic vesicle glycoprotein 2B	ECM-receptor interaction (ko04512)	[R]	General function prediction only	Major Facilitator Superfamily;; Sugar (and other) transporter;; Pentapeptide repeats (9 copies)	Synaptic vesicle 2-related protein GN=svop OS=Xenopus laevis (African clawed frog) PE=2 SV=1	R	General function prediction only	PREDICTED: synaptic vesicle glycoprotein 2B isoform X4 [Gallus gallus]
gene14103	217	192	289	246	236	480	512	451	393	364	2.97098	2.57887	4.01931	2.87476	3.2819	7.53429	6.48465	6.60931	6.72345	5.3667	0.00312957	1.42267	up	--	--	--	--	--	--	--	--	--	S	Function unknown	PREDICTED: protein FAM169B isoform X2 [Meleagris gallopavo]
gene14104	1177	1567	1548	1441	1459	1727	2573	2325	1624	1930	2.50679	2.82756	3.24683	2.61236	2.9293	4.04029	9.5314	4.59487	3.78959	3.81029	0.000933969	1.00063	up	[O]	Posttranslational modification, protein turnover, chaperones	--	--	--	[O]	Posttranslational modification, protein turnover, chaperones	Pyroglutamyl peptidase	--	O	Posttranslational modification, protein turnover, chaperones	PREDICTED: pyroglutamyl-peptidase 1-like protein [Meleagris gallopavo]
gene14210	13	13	13	12	24	4189	3187	3594	4560	4438	0.084314	0.045555	0.047328	0.036841	0.161187	44.1138	24.8106	32.0015	48.0696	39.1922	2.30722e-73	8.56515	up	--	--	Cellular Component: cytoplasm (GO:0005737);; Cellular Component: cytoskeleton (GO:0005856);; Molecular Function: cytoskeletal protein binding (GO:0008092);; Cellular Component: extrinsic component of membrane (GO:0019898);;	--	--	--	--	FERM central domain;; FERM adjacent (FA);; FERM C-terminal PH-like domain	FERM domain-containing protein 3 GN=frmd3 OS=Xenopus tropicalis (Western clawed frog) PE=2 SV=2	R	General function prediction only	PREDICTED: FERM domain-containing protein 5 isoform X3 [Gallus gallus]
gene14238	3107	3123	3399	4460	3214	4608	6208	5377	4619	5354	21.8133	19.7751	21.4492	24.5674	21.9597	38.2706	37.9239	37.6748	38.3282	37.2057	0.000411669	1.11017	up	[O]	Posttranslational modification, protein turnover, chaperones	Molecular Function: protease binding (GO:0002020);; Molecular Function: serine-type endopeptidase activity (GO:0004252);; Molecular Function: serine-type endopeptidase inhibitor activity (GO:0004867);; Cellular Component: extracellular space (GO:0005615);; Cellular Component: trans-Golgi network (GO:0005802);; Biological Process: signal peptide processing (GO:0006465);; Biological Process: proteo…	K01349|0|gga:395457|K01349 furin [EC:3.4.21.75] | (RefSeq) FURIN; furin (paired basic amino acid cleaving enzyme)	Influenza A (ko05164)	[O]	Posttranslational modification, protein turnover, chaperones	Subtilase family;; Proprotein convertase P-domain	Furin-1 (Precursor) GN=furin OS=Xenopus laevis (African clawed frog) PE=2 SV=1	O	Posttranslational modification, protein turnover, chaperones	furin precursor [Gallus gallus]
gene14309	0	0	2	0	0	871	594	554	654	599	0	0	0.016299	0	0	17.4213	7.01138	7.74279	10.8534	7.85569	5.05569e-49	11.2862	up	--	--	Cellular Component: cytoplasm (GO:0005737);; Cellular Component: cytoskeleton (GO:0005856);; Molecular Function: cytoskeletal protein binding (GO:0008092);; Cellular Component: extrinsic component of membrane (GO:0019898);;	--	--	--	--	--	FERM domain-containing protein 3 GN=frmd3 OS=Xenopus tropicalis (Western clawed frog) PE=2 SV=2	R	General function prediction only	PREDICTED: FERM domain-containing protein 5 isoform X5 [Gallus gallus]
gene14341	7843	9107	8459	10493	9324	12484	17488	14287	10516	16081	152.01	160.877	147.549	160.777	176.547	285.242	293.46	275.479	240.284	308.982	0.000809952	1.14055	up	[S]	Function unknown	Cellular Component: mitochondrion (GO:0005739);; Biological Process: ubiquinone biosynthetic process (GO:0006744);;	K18587|0|gga:415636|K18587 ubiquinone biosynthesis protein COQ9 | (RefSeq) COQ9; coenzyme Q9	--	[S]	Function unknown	COQ9	Ubiquinone biosynthesis protein COQ9, mitochondrial (Precursor) GN=coq9 OS=Xenopus tropicalis (Western clawed frog) PE=2 SV=1	S	Function unknown	ubiquinone biosynthesis protein COQ9, mitochondrial [Gallus gallus]
gene14452	5077	6501	6125	5980	5480	7402	11389	8040	6777	7669	31.2555	36.476	33.9374	29.1064	32.9609	53.7232	60.7053	49.2452	49.1891	46.8027	0.00322513	1.00189	up	[O]	Posttranslational modification, protein turnover, chaperones	Biological Process: protein polyubiquitination (GO:0000209);; Molecular Function: ubiquitin-protein transferase activity (GO:0004842);; Molecular Function: receptor activity (GO:0004872);; Molecular Function: zinc ion binding (GO:0008270);; Cellular Component: integral component of endoplasmic reticulum membrane (GO:0030176);; Biological Process: ubiquitin-dependent ERAD pathway (GO:0030433);; Bi…	K10636|0|gga:415697|K10636 autocrine motility factor receptor [EC:2.3.2.27] | (RefSeq) AMFR; autocrine motility factor receptor	Protein processing in endoplasmic reticulum (ko04141)	[O]	Posttranslational modification, protein turnover, chaperones	Ring finger domain;; CUE domain;; Zinc finger, C3HC4 type (RING finger);; Zinc finger, C3HC4 type (RING finger);; RING-H2 zinc finger;; Zinc finger, C3HC4 type (RING finger);; Anaphase-promoting complex subunit 11 RING-H2 finger	E3 ubiquitin-protein ligase synoviolin (Precursor) GN=syvn1 OS=Danio rerio (Zebrafish) PE=2 SV=2	O	Posttranslational modification, protein turnover, chaperones	PREDICTED: E3 ubiquitin-protein ligase AMFR isoform X2 [Gallus gallus]
gene14526	25341	22886	28310	22995	19184	55158	66661	62289	51033	37398	123.704	103.799	121.562	86.6839	89.3738	309.208	267.187	296.888	287.192	171.269	6.45745e-07	1.72402	up	--	--	Molecular Function: hydrolase activity, hydrolyzing O-glycosyl compounds (GO:0004553);; Molecular Function: calmodulin binding (GO:0005516);; Biological Process: glycogen metabolic process (GO:0005977);;	K07190|0|gga:415741|K07190 phosphorylase kinase alpha/beta subunit | (RefSeq) PHKB; phosphorylase kinase regulatory subunit beta	Calcium signaling pathway (ko04020);; Insulin signaling pathway (ko04910)	[G]	Carbohydrate transport and metabolism	Glycosyl hydrolases family 15	Phosphorylase b kinase regulatory subunit alpha, liver isoform GN=phka2 OS=Takifugu rubripes (Japanese pufferfish) PE=3 SV=1	G	Carbohydrate transport and metabolism	phosphorylase b kinase regulatory subunit beta [Gallus gallus]
gene14527	2067	2573	2465	2580	1703	3052	5183	4576	3122	3137	18.791	21.0645	17.8552	18.168	14.9997	27.3096	35.0008	37.8318	29.4926	25.4117	1.62617e-05	1.25365	up	--	--	--	K17257|0|gga:415742|K17257 integrin alpha FG-GAP repeat containing protein 1 | (RefSeq) ITFG1; integrin alpha FG-GAP repeat containing 1	--	[S]	Function unknown	Repeat domain in Vibrio, Colwellia, Bradyrhizobium and Shewanella;; FG-GAP repeat	--	S	Function unknown	T-cell immunomodulatory protein precursor [Gallus gallus]
gene14592	58941	53340	60075	52472	49031	146635	200331	172583	134916	138771	593.155	489.266	544.147	417.489	482.096	1739.74	1745.5	1727.93	1600.79	1384.52	9.38902e-10	2.03815	up	[G]	Carbohydrate transport and metabolism	Molecular Function: glucose-6-phosphate isomerase activity (GO:0004347);; Cellular Component: nucleus (GO:0005634);; Cellular Component: cytoplasm (GO:0005737);; Cellular Component: plasma membrane (GO:0005886);; Biological Process: gluconeogenesis (GO:0006094);; Biological Process: glycolytic process (GO:0006096);;	K01810|0|gga:415783|K01810 glucose-6-phosphate isomerase [EC:5.3.1.9] | (RefSeq) GPI; glucose-6-phosphate isomerase	Glycolysis / Gluconeogenesis (ko00010);; Pentose phosphate pathway (ko00030);; Starch and sucrose metabolism (ko00500);; Amino sugar and nucleotide sugar metabolism (ko00520);; Carbon metabolism (ko01200)	[G]	Carbohydrate transport and metabolism	Phosphoglucose isomerase	--	G	Carbohydrate transport and metabolism	glucose-6-phosphate isomerase [Gallus gallus]
gene14627	32	23	66	32	42	117	107	154	73	130	0.140825	0.08354	0.255606	0.10198	0.233628	0.627056	0.725429	2.16447	0.386876	0.706773	0.00170052	2.07692	up	--	--	Molecular Function: calcium ion binding (GO:0005509);; Cellular Component: plasma membrane (GO:0005886);; Biological Process: homophilic cell adhesion via plasma membrane adhesion molecules (GO:0007156);; Biological Process: response to cold (GO:0009409);; Cellular Component: integral component of membrane (GO:0016021);; Biological Process: synaptic transmission, glutamatergic (GO:0035249);; Cell…	K06800|0|phi:102104235|K06800 cadherin 8, type 2 | (RefSeq) CDH8; cadherin 8	--	[S]	Function unknown	Cadherin domain;; Cadherin cytoplasmic region;; Cadherin-like	Cadherin-11 (Precursor) GN=CDH11 OS=Gallus gallus (Chicken) PE=2 SV=1	S	Function unknown	PREDICTED: cadherin-8 [Corvus cornix cornix]
gene14694	6710	5226	6972	7122	7108	11347	12458	8761	8625	9164	24.6584	16.6327	22.0749	19.6714	24.7693	48.0104	37.6666	31.3966	37.0902	33.0802	0.00113	1.11587	up	--	--	Cellular Component: SCF ubiquitin ligase complex (GO:0019005);; Molecular Function: cyclin binding (GO:0030332);; Biological Process: SCF-dependent proteasomal ubiquitin-dependent protein catabolic process (GO:0031146);; Biological Process: mitotic G1 DNA damage checkpoint (GO:0031571);;	K10308|0|gga:100857445|K10308 F-box protein 31 | (RefSeq) FBXO31; F-box protein 31	--	--	--	--	F-box only protein 31 GN=fbxo31 OS=Xenopus tropicalis (Western clawed frog) PE=2 SV=1	R	General function prediction only	PREDICTED: F-box only protein 31-like isoform X2 [Gallus gallus]
gene14696	10536	14089	13069	13066	11775	16461	22204	18126	15083	20277	104.681	127.597	116.878	102.643	114.307	192.818	191.012	179.177	176.691	199.735	0.00308719	1.05953	up	--	--	Cellular Component: cytosol (GO:0005829);;	K10435|3.57016e-86|gga:427559|K10435 microtubule-associated protein 1 light chain | (RefSeq) MAP1LC3B; microtubule associated protein 1 light chain 3 beta	--	[Z]	Cytoskeleton	Autophagy protein Atg8 ubiquitin like;; Ubiquitin-like autophagy protein Apg12	--	Z	Cytoskeleton	microtubule-associated proteins 1A/1B light chain 3B [Gallus gallus]
gene14698	729	464	645	537	833	1497	1680	1313	1637	1483	7.4821	4.34143	5.95423	4.35931	8.35118	18.1217	14.9335	13.4139	19.8156	15.1005	2.55342e-09	1.74853	up	[S]	Function unknown	Cellular Component: endoplasmic reticulum membrane (GO:0005789);; Cellular Component: plasma membrane (GO:0005886);; Biological Process: learning (GO:0007612);; Biological Process: memory (GO:0007613);; Molecular Function: calcium-release channel activity (GO:0015278);; Cellular Component: junctional membrane complex (GO:0030314);; Biological Process: exploration behavior (GO:0035640);; Biologica…	K19530|0|clv:102098053|K19530 junctophilin | (RefSeq) JPH3; junctophilin 3	--	[R]	General function prediction only	MORN repeat	Radial spoke head 10 homolog B GN=rsph10b OS=Danio rerio (Zebrafish) PE=2 SV=1	R	General function prediction only	PREDICTED: junctophilin-3 isoform X1 [Pygoscelis adeliae]
gene14699	1401	1783	1387	1432	1583	3866	3691	2915	3632	4532	10.0442	11.6586	8.94963	8.12949	11.0893	32.6783	22.9116	20.79	30.7023	32.2139	4.43875e-11	1.80326	up	--	--	Cellular Component: endoplasmic reticulum membrane (GO:0005789);; Cellular Component: plasma membrane (GO:0005886);; Biological Process: learning (GO:0007612);; Biological Process: memory (GO:0007613);; Molecular Function: calcium-release channel activity (GO:0015278);; Cellular Component: junctional membrane complex (GO:0030314);; Biological Process: exploration behavior (GO:0035640);; Biologica…	--	--	[R]	General function prediction only	--	--	R	General function prediction only	PREDICTED: junctophilin-3 isoform X2 [Gallus gallus]
gene14701	4988	2640	4564	2808	3470	16252	19238	16154	8160	8241	23.1351	7.65377	18.9761	7.63195	15.2988	91.6896	77.2205	77.3128	30.7059	22.8264	2.82843e-06	2.37636	up	[E]	Amino acid transport and metabolism	Biological Process: amino acid transmembrane transport (GO:0003333);; Molecular Function: L-amino acid transmembrane transporter activity (GO:0015179);; Biological Process: L-amino acid transport (GO:0015807);; Cellular Component: integral component of membrane (GO:0016021);;	K13780|0|gga:415832|K13780 solute carrier family 7 (L-type amino acid transporter), member 5 | (RefSeq) SLC7A5; solute carrier family 7 member 5	mTOR signaling pathway (ko04150)	[E]	Amino acid transport and metabolism	Amino acid permease;; Amino acid permease	Y+L amino acid transporter 2 OS=Danio rerio (Zebrafish) PE=2 SV=1	E	Amino acid transport and metabolism	large neutral amino acids transporter small subunit 1 [Gallus gallus]
gene1471	37	84	40	65	23	128	198	86	53	100	0.226545	0.418783	0.215822	0.256737	0.111644	0.763637	0.984968	0.440831	0.324201	0.504564	0.0147021	1.68432	up	--	--	--	--	--	--	--	--	--	S	Function unknown	PREDICTED: uncharacterized protein C1orf114 [Gallus gallus]
gene14852	4529	1259	173	827	35662	174737	283950	266169	226420	316447	142.837	36.1804	4.89116	20.6248	1099.09	6498.21	7754.94	8353.13	8420.76	9896.13	2.47513e-53	5.27717	up	[TZDR]	Signal transduction mechanisms;; Cytoskeleton;; Cell cycle control, cell division, chromosome partitioning;; General function prediction only	Molecular Function: calcium ion binding (GO:0005509);; Cellular Component: cytosol (GO:0005829);; Cellular Component: troponin complex (GO:0005861);; Biological Process: response to stress (GO:0006950);; Molecular Function: troponin I binding (GO:0031013);; Molecular Function: troponin T binding (GO:0031014);; Biological Process: regulation of muscle filament sliding speed (GO:0032972);; Molecula…	K05865|5.26445e-101|tgu:100222022|K05865 troponin C, slow skeletal and cardiac muscles | (RefSeq) TNNC1; troponin C1, slow skeletal and cardiac type	Calcium signaling pathway (ko04020);; Cardiac muscle contraction (ko04260);; Adrenergic signaling in cardiomyocytes (ko04261)	[T]	Signal transduction mechanisms	EF-hand domain pair;; EF-hand domain pair;; EF hand;; EF-hand domain;; EF hand;; EF-hand domain;; Cytoskeletal-regulatory complex EF hand;; Secreted protein acidic and rich in cysteine Ca binding region	Troponin C, slow skeletal and cardiac muscles GN=TNNC1 OS=Gallus gallus (Chicken) PE=1 SV=1	T	Signal transduction mechanisms	troponin C, slow skeletal and cardiac muscles [Gallus gallus]
gene14853	2921	3216	3011	2803	2791	4125	5004	4603	4407	3333	12.7405	12.9019	11.7597	10.1778	11.2945	21.002	18.4101	19.0125	21.7875	14.4372	0.000781757	1.06383	up	[S]	Function unknown	--	--	--	[TZ]	Signal transduction mechanisms;; Cytoskeleton	Leucine Rich repeats (2 copies);; PX domain;; Leucine rich repeat;; Leucine Rich Repeat;; Leucine Rich repeat;; Leucine rich repeat	Serine/threonine-protein kinase 11-interacting protein GN=stk11ip OS=Xenopus tropicalis (Western clawed frog) PE=2 SV=1	TZ	Signal transduction mechanisms;; Cytoskeleton	PREDICTED: nischarin [Meleagris gallopavo]
gene14912	2691	2212	3602	3203	3317	4056	5644	4774	3380	4073	12.7781	9.57384	15.3938	12.0213	15.3868	22.7057	23.2003	22.5506	18.9198	19.1689	0.000691612	1.0464	up	--	--	Molecular Function: zinc ion binding (GO:0008270);;	K12169|0|gga:415923|K12169 Kip1 ubiquitination-promoting complex protein 1 [EC:2.3.2.27] | (RefSeq) RNF123; ring finger protein 123	--	[O]	Posttranslational modification, protein turnover, chaperones	SPRY domain;; Zinc finger, C3HC4 type (RING finger)	ATP-dependent RNA helicase DDX1 GN=ddx1 OS=Xenopus tropicalis (Western clawed frog) PE=2 SV=1	O	Posttranslational modification, protein turnover, chaperones	E3 ubiquitin-protein ligase RNF123 [Gallus gallus]
gene15128	26	37	31	32	30	49	95	51	85	152	0.208636	0.274911	0.226448	0.204095	0.252084	0.705379	1.15172	0.794304	0.96157	2.28185	0.00425591	1.93909	up	--	--	--	--	--	--	--	Domain of unknown function (DUF4200)	--	S	Function unknown	PREDICTED: coiled-coil domain-containing protein 37 [Gallus gallus]
gene15149	1	41	33	16	26	48	117	53	43	73	0.013494	0.517495	0.416273	0.17669	0.352303	0.78798	1.41528	0.740402	0.704901	1.00675	0.00383181	1.98737	up	[RTKL]	General function prediction only;; Signal transduction mechanisms;; Transcription;; Replication, recombination and repair	--	K08832|1.10666e-132|apla:101797129|K08832 serine/threonine-protein kinase SRPK3 [EC:2.7.11.1] | (RefSeq) SRSF protein kinase 3	--	[T]	Signal transduction mechanisms	Protein kinase domain;; Protein tyrosine kinase	Dual specificity tyrosine-phosphorylation-regulated kinase 2 OS=Gallus gallus (Chicken) PE=2 SV=1	T	Signal transduction mechanisms	PREDICTED: SRSF protein kinase 3-like isoform X2 [Meleagris gallopavo]
gene15184	3788	3305	4131	3907	4142	8438	11997	10119	7072	7219	18.802	15.5432	18.6853	15.3875	20.7452	42.4974	50.9497	52.4409	36.323	34.3912	1.12581e-08	1.7195	up	--	--	Molecular Function: ubiquitin-protein transferase activity (GO:0004842);; Cellular Component: nucleus (GO:0005634);; Cellular Component: cytoplasm (GO:0005737);; Molecular Function: zinc ion binding (GO:0008270);; Biological Process: protein ubiquitination involved in ubiquitin-dependent protein catabolic process (GO:0042787);; Biological Process: developmental cell growth (GO:0048588);; Biologic…	K11969|0|fab:101818723|K11969 ariadne-2 [EC:2.3.2.27] | (RefSeq) ARIH2; ariadne RBR E3 ubiquitin protein ligase 2	--	[O]	Posttranslational modification, protein turnover, chaperones	IBR domain	E3 ubiquitin-protein ligase arih1 GN=arih1 OS=Danio rerio (Zebrafish) PE=2 SV=1	O	Posttranslational modification, protein turnover, chaperones	PREDICTED: E3 ubiquitin-protein ligase ARIH2 isoform X1 [Ficedula albicollis]
gene15302	18523	12951	17983	18063	18715	26847	33479	25954	18900	21381	74.9287	47.1604	66.1125	57.0574	72.857	127.664	117.166	105	89.0474	86.9573	0.00406345	1.05429	up	--	--	--	K17263|0|mgp:100545074|K17263 cullin-associated NEDD8-dissociated protein 1 | (RefSeq) cullin-associated NEDD8-dissociated protein 1-like	--	[R]	General function prediction only	TATA-binding protein interacting (TIP20);; HEAT repeats;; HEAT-like repeat;; HEAT repeat;; UME (NUC010) domain;; Adaptin N terminal region;; non-SMC mitotic condensation complex subunit 1;; CLASP N terminal;; Vacuolar 14 Fab1-binding region;; Domain of unknown function (DUF1981);; Armadillo/beta-catenin-like repeat	--	R	General function prediction only	PREDICTED: cullin-associated NEDD8-dissociated protein 1 isoformX2 [Gallus gallus]
gene15340	700	1164	1006	1260	1241	1336	1249	1052	1886	2869	8.61372	15.0897	13.4528	13.706	11.3752	21.6336	15.7279	14.9195	31.6776	37.0741	0.023187	1.14822	up	[E]	Amino acid transport and metabolism	Molecular Function: aminoacylase activity (GO:0004046);; Cellular Component: cytoplasm (GO:0005737);; Biological Process: proteolysis (GO:0006508);; Biological Process: cellular amino acid metabolic process (GO:0006520);; Molecular Function: metallopeptidase activity (GO:0008237);;	K14677|0|gga:100858836|K14677 aminoacylase [EC:3.5.1.14] | (RefSeq) ACY1; aminoacylase 1	Arginine biosynthesis (ko00220);; 2-Oxocarboxylic acid metabolism (ko01210);; Biosynthesis of amino acids (ko01230)	[E]	Amino acid transport and metabolism	Peptidase family M20/M25/M40;; Peptidase dimerisation domain	Probable carboxypeptidase PM20D1.2 (Precursor) GN=pm20d1.2 OS=Danio rerio (Zebrafish) PE=2 SV=1	E	Amino acid transport and metabolism	PREDICTED: aminoacylase-1 isoformX1 [Gallus gallus]
gene15457	2873	1308	3118	3848	3273	7658	11695	6978	6709	7448	12.5825	5.21907	12.2869	13.3211	14.0021	39.5379	44.3443	30.4026	34.6425	32.3357	8.52655e-12	1.99401	up	--	--	--	--	--	--	--	Domain of unknown function (DUF4585)	--	S	Function unknown	PREDICTED: proline-rich basic protein 1 [Meleagris gallopavo]
gene15468	4059	4594	4469	5529	4081	8709	12977	10612	7862	8329	23.4094	24.2619	23.3255	24.6957	23.1253	59.457	65.1784	61.1538	53.7171	47.7821	2.15631e-07	1.6036	up	[J]	Translation, ribosomal structure and biogenesis	Biological Process: nuclear-transcribed mRNA catabolic process, nonsense-mediated decay (GO:0000184);; Cellular Component: cytoplasm (GO:0005737);; Biological Process: translational termination (GO:0006415);; Biological Process: protein methylation (GO:0006479);; Molecular Function: translation release factor activity, codon specific (GO:0016149);;	K03265|0|acs:100566787|K03265 peptide chain release factor subunit 1 | (RefSeq) etf1; eukaryotic translation termination factor 1	mRNA surveillance pathway (ko03015)	[J]	Translation, ribosomal structure and biogenesis	eRF1 domain 2;; eRF1 domain 3;; eRF1 domain 1	Eukaryotic peptide chain release factor subunit 1 GN=etf1 OS=Xenopus tropicalis (Western clawed frog) PE=2 SV=1	J	Translation, ribosomal structure and biogenesis	PREDICTED: eukaryotic peptide chain release factor subunit 1 [Anolis carolinensis]
gene15627	1299	1201	1307	1480	1394	1833	2604	2176	1845	2110	11.0373	9.19364	10.0804	9.8945	11.5073	18.6257	19.1016	18.4423	18.5874	17.8912	6.53397e-05	1.16253	up	--	--	--	--	--	--	--	--	--	S	Function unknown	PREDICTED: SUMO-interacting motif-containing protein 1 isoform X2 [Gallus gallus]
gene15682	8763	8418	9635	9962	9073	17824	19828	18059	15795	14832	69.7939	60.4325	69.4625	62.1705	69.3298	168.887	137.043	145.594	151.79	117.634	1.95452e-05	1.43339	up	--	--	Molecular Function: nucleotide binding (GO:0000166);; Molecular Function: mRNA binding (GO:0003729);; Biological Process: transport (GO:0006810);; Cellular Component: cytoplasmic stress granule (GO:0010494);; Biological Process: negative regulation of canonical Wnt signaling pathway (GO:0090090);;	K17265|0|gga:416265|K17265 Ras GTPase-activating protein-binding protein 1 [EC:3.6.4.12 3.6.4.13] | (RefSeq) G3BP1; G3BP stress granule assembly factor 1	--	[T]	Signal transduction mechanisms	Nuclear transport factor 2 (NTF2) domain;; RNA recognition motif. (a.k.a. RRM, RBD, or RNP domain);; RNA recognition motif (a.k.a. RRM, RBD, or RNP domain)	Heterogeneous nuclear ribonucleoprotein A2 homolog 1 OS=Xenopus laevis (African clawed frog) PE=2 SV=1	T	Signal transduction mechanisms	PREDICTED: ras GTPase-activating protein-binding protein 1 isoform X2 [Meleagris gallopavo]
gene15697	15730	11222	21435	22817	17483	32536	47034	35762	31268	39645	120.964	81.2705	144.712	130.003	119.664	300.153	59.2717	285.911	288.622	314.329	3.07495e-06	1.57911	up	--	--	--	--	--	--	--	Calcineurin-binding protein (Calsarcin)	--	R	General function prediction only	PREDICTED: myozenin-3 isoform X2 [Gallus gallus]
gene15800	60	43	129	91	70	174	192	189	150	392	0.171743	0.113641	0.408307	0.506565	0.297288	1.66441	0.621652	0.660969	0.951425	1.12941	0.000632806	1.96729	up	[I]	Lipid transport and metabolism	Molecular Function: long-chain fatty acid-CoA ligase activity (GO:0004467);; Cellular Component: mitochondrion (GO:0005739);; Biological Process: neuroblast proliferation (GO:0007405);; Biological Process: metabolic process (GO:0008152);; Cellular Component: membrane (GO:0016020);; Molecular Function: enzyme binding (GO:0019899);;	K01897|0|gga:416324|K01897 long-chain acyl-CoA synthetase [EC:6.2.1.3] | (RefSeq) ACSL6; acyl-CoA synthetase long-chain family member 6	Fatty acid biosynthesis (ko00061);; Fatty acid degradation (ko00071);; Fatty acid metabolism (ko01212);; PPAR signaling pathway (ko03320);; Peroxisome (ko04146);; Adipocytokine signaling pathway (ko04920)	[I]	Lipid transport and metabolism	AMP-binding enzyme	Long-chain-fatty-acid--CoA ligase ACSBG2 GN=ACSBG2 OS=Gallus gallus (Chicken) PE=2 SV=2	I	Lipid transport and metabolism	PREDICTED: long-chain-fatty-acid--CoA ligase 6 isoform X5 [Gallus gallus]
gene16077	2230	3416	4425	3488	2496	4839	6811	5821	3864	3530	5.59251	7.79596	10.0704	6.90491	6.22539	14.2843	14.793	14.7254	11.4057	8.76126	0.000215465	1.15727	up	--	--	Molecular Function: G-protein coupled receptor binding (GO:0001664);; Biological Process: in utero embryonic development (GO:0001701);; Molecular Function: GTPase activity (GO:0003924);; Molecular Function: signal transducer activity (GO:0004871);; Molecular Function: GTP binding (GO:0005525);; Biological Process: obsolete GTP catabolic process (GO:0006184);; Biological Process: G-protein coupled…	K04346|0|gga:769924|K04346 guanine nucleotide-binding protein subunit alpha-12 | (RefSeq) GNA12; G protein subunit alpha 12	MAPK signaling pathway (ko04010);; Vascular smooth muscle contraction (ko04270);; Regulation of actin cytoskeleton (ko04810)	[DT]	Cell cycle control, cell division, chromosome partitioning;; Signal transduction mechanisms	G-protein alpha subunit;; ADP-ribosylation factor family	Guanine nucleotide-binding protein G(q) subunit alpha GN=gnaq OS=Xenopus laevis (African clawed frog) PE=2 SV=2	T	Signal transduction mechanisms	PREDICTED: guanine nucleotide-binding protein subunit alpha-12 [Gallus gallus]
gene16120	6207	5604	5375	6987	4889	9852	10032	8447	8298	7357	34.3471	27.8667	26.8029	30.3943	26.1799	64.0346	47.8283	46.5459	54.332	39.3248	0.00105346	1.12753	up	--	--	Biological Process: in utero embryonic development (GO:0001701);; Cellular Component: cytoplasm (GO:0005737);; Cellular Component: COP9 signalosome (GO:0008180);; Biological Process: protein deneddylation (GO:0010388);;	K12177|0|tgu:100227969|K12177 COP9 signalosome complex subunit 3 | (RefSeq) COPS3; COP9 signalosome subunit 3	--	[OT]	Posttranslational modification, protein turnover, chaperones;; Signal transduction mechanisms	PCI domain	COP9 signalosome complex subunit 3 GN=COPS3 OS=Gallus gallus (Chicken) PE=2 SV=1	OT	Posttranslational modification, protein turnover, chaperones;; Signal transduction mechanisms	COP9 signalosome complex subunit 3 [Gallus gallus]
gene16135	7155	5415	7626	5997	6886	29056	43345	37324	21746	21102	25.8278	17.811	24.773	17.057	24.2777	123.626	135.499	134.08	90.2401	74.4801	7.10567e-13	2.70097	up	--	--	Biological Process: response to hypoxia (GO:0001666);; Biological Process: mRNA processing (GO:0006397);; Biological Process: mRNA export from nucleus (GO:0006406);; Biological Process: spermatogenesis (GO:0007283);; Cellular Component: nuclear speck (GO:0016607);; Molecular Function: oxidoreductase activity, acting on paired donors, with incorporation or reduction of molecular oxygen, 2-oxogluta…	K10767|0|gga:770703|K10767 mRNA N6-methyladenine demethylase [EC:1.14.11.53] | (RefSeq) ALKBH5; alkB homolog 5, RNA demethylase	--	[S]	Function unknown	2OG-Fe(II) oxygenase superfamily	RNA demethylase ALKBH5 GN=alkbh5 OS=Xenopus tropicalis (Western clawed frog) PE=2 SV=1	S	Function unknown	PREDICTED: RNA demethylase ALKBH5 isoform X1 [Gallus gallus]
gene16138	1733	1542	1634	1946	2014	2849	4540	3402	2308	2563	12.8552	10.4024	10.9183	11.411	14.5989	24.9334	29.1513	25.0974	20.1979	18.8233	2.70142e-06	1.31272	up	--	--	--	--	--	--	--	Mab-21 protein	Mitochondrial dynamics protein MID49 GN=mief2 OS=Xenopus laevis (African clawed frog) PE=2 SV=1	S	Function unknown	PREDICTED: mitochondrial dynamic protein MID49 isoform X2 [Gallus gallus]
gene16140	3846	3986	5220	4442	3863	5984	11576	6474	5792	5655	14.6298	14.2113	17.4055	12.8476	14.3596	26.8473	38.9586	24.5107	24.87	20.8001	0.000154318	1.231	up	--	--	Cellular Component: nucleus (GO:0005634);;	--	--	--	--	Vesicle coat protein involved in Golgi to plasma membrane transport	Smith-Magenis syndrome chromosomal region candidate gene 8-B protein homolog GN=smcr8b OS=Danio rerio (Zebrafish) PE=2 SV=1	R	General function prediction only	PREDICTED: smith-Magenis syndrome chromosomal region candidate gene 8 protein isoform X3 [Gallus gallus]
gene16182	17152	17612	13325	28649	10698	23315	27963	25689	34383	36576	268.627	251.353	187.792	354.74	163.671	430.498	379.069	400.333	635.048	568.163	0.000336418	1.29703	up	[J]	Translation, ribosomal structure and biogenesis	Molecular Function: structural constituent of ribosome (GO:0003735);; Biological Process: translation (GO:0006412);; Cellular Component: cytosolic large ribosomal subunit (GO:0022625);;	K02925|0|gga:416542|K02925 large subunit ribosomal protein L3e | (RefSeq) RPL3L; ribosomal protein L3 like	Ribosome (ko03010)	[J]	Translation, ribosomal structure and biogenesis	Ribosomal protein L3	--	J	Translation, ribosomal structure and biogenesis	60S ribosomal protein L3-like [Gallus gallus]
gene16190	2128	2150	1756	2295	1814	2808	4905	3522	2464	2179	9.41813	10.1646	7.59919	9.66883	9.37385	18.1859	23.0188	18.8072	15.2133	9.80143	0.000632159	1.14688	up	--	--	Molecular Function: zinc ion binding (GO:0008270);;	--	--	[O]	Posttranslational modification, protein turnover, chaperones	--	Zinc finger protein 598 GN=znf598 OS=Danio rerio (Zebrafish) PE=1 SV=2	O	Posttranslational modification, protein turnover, chaperones	PREDICTED: zinc finger protein 598 isoform X4 [Gallus gallus]
gene16202	2116	2306	2501	1567	1917	8873	17126	11345	4611	10288	14.8008	14.7023	16.0284	8.66686	13.2395	74.3339	104.097	79.45	38.5389	71.5416	6.37324e-09	2.78456	up	[G]	Carbohydrate transport and metabolism	Biological Process: carbohydrate metabolic process (GO:0005975);; Molecular Function: phosphoglycolate phosphatase activity (GO:0008967);;	K19269|4.63982e-168|gga:416559|K19269 phosphoglycolate phosphatase [EC:3.1.3.18 3.1.3.48] | (RefSeq) PGP, AUM, G3PP; phosphoglycolate phosphatase	Glyoxylate and dicarboxylate metabolism (ko00630);; Carbon metabolism (ko01200)	[P]	Inorganic ion transport and metabolism	Haloacid dehalogenase-like hydrolase;; HAD-hyrolase-like;; haloacid dehalogenase-like hydrolase;; Haloacid dehalogenase-like hydrolase	Phosphoglycolate phosphatase GN=PGP OS=Gallus gallus (Chicken) PE=2 SV=1	P	Inorganic ion transport and metabolism	phosphoglycolate phosphatase [Gallus gallus]
gene16239	23	47	22	10	54	165	243	164	118	112	0.157483	0.359637	0.124978	0.07476	0.412205	1.32735	1.71762	1.35183	1.04108	0.836883	2.2321e-06	2.82387	up	--	--	--	K05073|0|apla:101800880|K05073 interleukin 9 receptor | (RefSeq) interleukin-9 receptor-like	Cytokine-cytokine receptor interaction (ko04060)	--	--	Fibronectin type III domain	Erythropoietin receptor (Precursor) OS=Xenopus laevis (African clawed frog) PE=2 SV=1	T	Signal transduction mechanisms	PREDICTED: interleukin-9 receptor-like [Meleagris gallopavo]
gene16249	737	611	900	661	621	1945	3266	2884	1149	1482	9.39517	7.21668	8.14596	4.56241	6.2757	27.0185	33.6469	39.1699	17.3019	21.6934	2.27716e-05	2.09186	up	--	--	Biological Process: establishment of mitotic spindle orientation (GO:0000132);; Cellular Component: kinetochore (GO:0000776);; Biological Process: neuron migration (GO:0001764);; Cellular Component: cytoplasm (GO:0005737);; Cellular Component: microtubule (GO:0005874);; Biological Process: microtubule nucleation (GO:0007020);; Biological Process: mitotic cell cycle (GO:0007067);; Biological Proce…	K16738|0|gga:416597|K16738 nuclear distribution protein NudE | (RefSeq) NDE1; nudE neurodevelopment protein 1	--	[Z]	Cytoskeleton	NUDE protein, C-terminal conserved region	Nuclear distribution protein nudE homolog 1 GN=NDE1 OS=Gallus gallus (Chicken) PE=2 SV=1	Z	Cytoskeleton	nuclear distribution protein nudE homolog 1 [Gallus gallus]
gene16265	5997	2531	7185	5026	5422	8597	10119	10290	6457	5065	8.81461	3.41204	9.4894	5.90477	7.82958	14.814	12.8575	15.0629	11.1096	7.51578	0.00437366	1.14763	up	[TDBLU]	Signal transduction mechanisms;; Cell cycle control, cell division, chromosome partitioning;; Chromatin structure and dynamics;; Replication, recombination and repair;; Intracellular trafficking, secretion, and vesicular transport	--	K08873|0|gga:416605|K08873 serine/threonine-protein kinase SMG1 [EC:2.7.11.1] | (RefSeq) SMG1, RP11-345J4.5; SMG1, nonsense mediated mRNA decay associated PI3K related kinase	mRNA surveillance pathway (ko03015)	[L]	Replication, recombination and repair	Phosphatidylinositol 3- and 4-kinase;; FATC domain	Serine/threonine-protein kinase atr GN=atr OS=Xenopus laevis (African clawed frog) PE=1 SV=2	T	Signal transduction mechanisms	PREDICTED: LOW QUALITY PROTEIN: serine/threonine-protein kinase SMG1 [Gallus gallus]
gene16319	545	200	576	575	534	904	903	1527	722	634	4.30649	2.5514	4.21929	3.70899	4.60317	7.59234	4.39099	11.5681	6.86306	4.15198	0.00646215	1.47071	up	--	--	Cellular Component: mitochondrion (GO:0005739);;	--	--	--	--	Transmembrane protein 223	Transmembrane protein 186 GN=tmem186 OS=Danio rerio (Zebrafish) PE=2 SV=1	S	Function unknown	PREDICTED: transmembrane protein 186 [Gallus gallus]
gene16320	728	714	702	495	970	1734	3317	2380	984	2120	3.32608	2.93659	2.80295	1.61489	4.1731	10.7038	12.7692	12.4364	5.33688	9.71016	1.09305e-06	1.98833	up	[E]	Amino acid transport and metabolism	Molecular Function: 4-aminobutyrate transaminase activity (GO:0003867);; Biological Process: gamma-aminobutyric acid metabolic process (GO:0009448);; Molecular Function: pyridoxal phosphate binding (GO:0030170);; Cellular Component: 4-aminobutyrate transaminase complex (GO:0032144);; Molecular Function: protein homodimerization activity (GO:0042803);; Biological Process: behavioral response to co…	K13524|0|gga:416642|K13524 4-aminobutyrate aminotransferase / (S)-3-amino-2-methylpropionate transaminase [EC:2.6.1.19 2.6.1.22] | (RefSeq) ABAT; 4-aminobutyrate aminotransferase	Alanine, aspartate and glutamate metabolism (ko00250);; Valine, leucine and isoleucine degradation (ko00280);; beta-Alanine metabolism (ko00410);; Propanoate metabolism (ko00640);; Butanoate metabolism (ko00650)	[E]	Amino acid transport and metabolism	Aminotransferase class-III	Ethanolamine-phosphate phospho-lyase GN=etnppl OS=Danio rerio (Zebrafish) PE=2 SV=1	E	Amino acid transport and metabolism	PREDICTED: 4-aminobutyrate aminotransferase, mitochondrial isoform X6 [Gallus gallus]
gene16407	1192	839	929	1712	1187	1867	1677	1318	1699	2024	8.70684	5.58936	6.10937	9.58562	8.48041	15.97	10.5991	9.57865	14.642	14.9804	0.000623865	1.07715	up	[R]	General function prediction only	--	K20408|0|phi:102100908|K20408 WD repeat-containing protein 24 | (RefSeq) WDR24; WD repeat domain 24	mTOR signaling pathway (ko04150)	[S]	Function unknown	WD domain, G-beta repeat	WD repeat-containing protein 24 GN=WDR24 OS=Gallus gallus (Chicken) PE=2 SV=1	S	Function unknown	PREDICTED: WD repeat-containing protein 24 [Meleagris gallopavo]
gene16416	931	1048	1282	882	810	1507	2471	2178	814	1597	8.68442	8.90564	10.7321	6.50087	7.38545	16.5607	19.9656	20.1891	8.93202	14.7687	0.000755265	1.2698	up	[F]	Nucleotide transport and metabolism	Molecular Function: nucleoside diphosphate kinase activity (GO:0004550);; Molecular Function: ATP binding (GO:0005524);; Biological Process: GTP biosynthetic process (GO:0006183);; Biological Process: UTP biosynthetic process (GO:0006228);; Biological Process: CTP biosynthetic process (GO:0006241);;	K00940|7.51064e-122|gga:416399|K00940 nucleoside-diphosphate kinase [EC:2.7.4.6] | (RefSeq) NME3, null; NME/NM23 nucleoside diphosphate kinase 3	Purine metabolism (ko00230);; Pyrimidine metabolism (ko00240)	[F]	Nucleotide transport and metabolism	Nucleoside diphosphate kinase	Nucleoside diphosphate kinase OS=Columba livia (Domestic pigeon) PE=2 SV=2	F	Nucleotide transport and metabolism	nucleoside diphosphate kinase 3 precursor [Gallus gallus]
gene16483	736	929	1160	1012	748	945	1789	1746	961	1539	6.14205	7.03164	8.62946	6.76114	6.13148	9.04322	13.1249	14.736	9.52112	12.8714	0.000453247	1.0974	up	--	--	Molecular Function: RNA binding (GO:0003723);;	K06963|0|gga:426998|K06963 tRNA acetyltransferase TAN1 | (RefSeq) THUMPD1; THUMP domain containing 1	--	[R]	General function prediction only	THUMP domain	--	R	General function prediction only	PREDICTED: THUMP domain-containing protein 1 [Gallus gallus]
gene16538	397	140	375	37	416	637	594	402	359	595	2.19535	0.700982	1.86333	0.161479	2.24367	4.1533	2.84183	2.20725	2.33668	3.26113	0.00119638	1.37404	up	--	--	--	--	--	--	--	--	--	--	--	PREDICTED: uncharacterized protein LOC425455 isoform X2 [Gallus gallus]
gene16635	1099	1570	1519	1374	1084	2118	3370	1900	700	2100	6.02229	7.40474	7.57653	6.03902	5.81246	14.7908	16.6755	10.7875	5.13456	11.7596	0.0312769	1.08941	up	--	--	--	K08486|1.74742e-118|mgp:100548921|K08486 syntaxin 1B/2/3 | (RefSeq) STX2; syntaxin 2	SNARE interactions in vesicular transport (ko04130)	[U]	Intracellular trafficking, secretion, and vesicular transport	Syntaxin;; Syntaxin-like protein;; SNARE domain	--	U	Intracellular trafficking, secretion, and vesicular transport	Syntaxin-2, partial [Pelecanus crispus]
gene16665	105	95	88	96	38	402	632	332	338	414	0.389232	0.299903	0.281968	0.262023	0.127971	2.25609	3.06401	1.1954	1.71589	1.76016	1.1768e-09	2.82988	up	--	--	--	K16452|2.23505e-175|gga:416817|K16452 coiled-coil domain-containing protein 92 | (RefSeq) CCDC92; coiled-coil domain containing 92	--	--	--	Coiled-coil domain of unknown function	--	S	Function unknown	PREDICTED: coiled-coil domain-containing protein 92 isoform X3 [Gallus gallus]
gene16677	85	1055	172	940	29	531	545	1790	2289	2796	1.17959	5.81736	1.7819	4.433	0.330009	3.46476	4.19377	7.40978	10.5276	11.8634	0.03951	2.37787	up	[R]	General function prediction only	Molecular Function: nucleotide binding (GO:0000166);; Molecular Function: nucleic acid binding (GO:0003676);;	K13155|2.40344e-150|gga:416823|K13155 U11/U12 small nuclear ribonucleoprotein 35 kDa protein | (RefSeq) SNRNP35, U1SNRNPBP; small nuclear ribonucleoprotein U11/U12 subunit 35	--	[A]	RNA processing and modification	RNA recognition motif. (a.k.a. RRM, RBD, or RNP domain);; RNA recognition motif (a.k.a. RRM, RBD, or RNP domain);; RNA recognition motif. (a.k.a. RRM, RBD, or RNP domain)	U11/U12 small nuclear ribonucleoprotein 35 kDa protein GN=snrnp35 OS=Xenopus laevis (African clawed frog) PE=2 SV=1	A	RNA processing and modification	U11/U12 small nuclear ribonucleoprotein 35 kDa protein [Gallus gallus]
gene16745	9740	11659	11418	9746	13800	13183	16962	18787	13925	17598	86.5726	94.4581	91.3453	68.4908	119.843	138.148	130.538	166.142	145.937	155.082	0.00492213	1.00421	up	[C]	Energy production and conversion	Cellular Component: mitochondrion (GO:0005739);; Molecular Function: oxidoreductase activity, acting on the aldehyde or oxo group of donors, NAD or NADP as acceptor (GO:0016620);; Biological Process: oxidation-reduction process (GO:0055114);;	K00128|0|phi:102102503|K00128 aldehyde dehydrogenase (NAD+) [EC:1.2.1.3] | (RefSeq) ALDH2; aldehyde dehydrogenase 2 family (mitochondrial)	Glycolysis / Gluconeogenesis (ko00010);; Pentose and glucuronate interconversions (ko00040);; Ascorbate and aldarate metabolism (ko00053);; Fatty acid degradation (ko00071);; Valine, leucine and isoleucine degradation (ko00280);; Lysine degradation (ko00310);; Arginine and proline metabolism (ko00330);; Histidine metabolism (ko00340);; Tryptophan metabolism (ko00380);; beta-Alanine metabolism (ko…	[C]	Energy production and conversion	Aldehyde dehydrogenase family	Retinal dehydrogenase 2 GN=ALDH1A2 OS=Gallus gallus (Chicken) PE=2 SV=2	C	Energy production and conversion	PREDICTED: aldehyde dehydrogenase, mitochondrial isoformX2 [Gallus gallus]
gene16746	1201	1240	1002	996	1036	1458	1997	2369	2035	1479	4.50232	4.59862	3.62412	3.15329	3.96111	7.1212	6.4862	9.01176	9.49297	5.90377	3.20949e-05	1.28467	up	[RTKL]	General function prediction only;; Signal transduction mechanisms;; Transcription;; Replication, recombination and repair	Molecular Function: p53 binding (GO:0002039);; Molecular Function: protein serine/threonine kinase activity (GO:0004674);; Molecular Function: ATP binding (GO:0005524);; Cellular Component: nucleus (GO:0005634);; Cellular Component: cytoplasm (GO:0005737);; Biological Process: regulation of translation (GO:0006417);; Biological Process: Ras protein signal transduction (GO:0007265);; Biological Pr…	K04442|0|phi:102102877|K04442 mitogen-activated protein kinase-activated protein kinase 5 [EC:2.7.11.1] | (RefSeq) MAPKAPK5; mitogen-activated protein kinase-activated protein kinase 5	MAPK signaling pathway (ko04010)	[T]	Signal transduction mechanisms	Protein kinase domain;; Protein tyrosine kinase;; Lipopolysaccharide kinase (Kdo/WaaP) family	Ribosomal protein S6 kinase alpha-5 GN=RPS6KA5 OS=Gallus gallus (Chicken) PE=2 SV=1	T	Signal transduction mechanisms	PREDICTED: MAP kinase-activated protein kinase 5 isoform X1 [Nipponia nippon]
gene16778	2590	2045	2295	1981	2387	3458	4350	3998	2827	2623	13.3612	8.77733	11.2766	8.07239	9.75155	20.2786	17.6661	19.0927	14.1862	11.8559	0.000183999	1.11156	up	[O]	Posttranslational modification, protein turnover, chaperones	--	K10588|0|mgp:100550203|K10588 ubiquitin-protein ligase E3 B [EC:2.3.2.26] | (RefSeq) UBE3B; ubiquitin protein ligase E3B	Ubiquitin mediated proteolysis (ko04120)	[O]	Posttranslational modification, protein turnover, chaperones	HECT-domain (ubiquitin-transferase)	Ubiquitin-protein ligase E3B GN=ube3b OS=Xenopus tropicalis (Western clawed frog) PE=2 SV=1	O	Posttranslational modification, protein turnover, chaperones	PREDICTED: ubiquitin-protein ligase E3B isoform X2 [Meleagris gallopavo]
gene16851	3801	3164	5136	5344	4439	5594	8495	6847	6556	4477	15.353	11.6491	18.6718	17.0675	17.5198	26.6401	29.7105	27.5186	31.2227	17.9295	0.00126701	1.07543	up	--	--	Biological Process: blood vessel development (GO:0001568);; Biological Process: heart development (GO:0007507);; Biological Process: animal organ morphogenesis (GO:0009887);; Biological Process: anterior/posterior pattern specification (GO:0009952);; Biological Process: thymus development (GO:0048538);; Biological Process: parathyroid gland development (GO:0060017);;	K04438|0|mgp:100538907|K04438 proto-oncogene C-crk | (RefSeq) CRKL; CRK like proto-oncogene, adaptor protein	MAPK signaling pathway (ko04010);; ErbB signaling pathway (ko04012);; Focal adhesion (ko04510);; Regulation of actin cytoskeleton (ko04810);; Insulin signaling pathway (ko04910)	[T]	Signal transduction mechanisms	Variant SH3 domain;; SH2 domain;; SH3 domain;; Variant SH3 domain	Adapter molecule crk GN=CRK OS=Gallus gallus (Chicken) PE=1 SV=1	T	Signal transduction mechanisms	PREDICTED: v-crk sarcoma virus CT10 oncogene homolog-like [Gallus gallus]
gene16853	1699	1894	2167	1806	2252	3191	4518	3325	2802	3000	11.0467	11.3074	12.5665	9.51076	14.4239	25.2992	26.1901	22.0898	22.1454	19.9237	7.21046e-06	1.27636	up	--	--	Biological Process: mitotic sister chromatid segregation (GO:0000070);; Cellular Component: cytoplasm (GO:0005737);; Cellular Component: centrosome (GO:0005813);; Cellular Component: polar microtubule (GO:0005827);; Biological Process: protein monoubiquitination (GO:0006513);; Biological Process: mitotic spindle assembly checkpoint (GO:0007094);; Cellular Component: Cul3-RING ubiquitin ligase com…	K10459|0|mgp:100546268|K10459 kelch-like protein 22 | (RefSeq) KLHL22; kelch like family member 22	--	[TR]	Signal transduction mechanisms;; General function prediction only	Kelch motif;; Kelch motif;; BTB/POZ domain;; Kelch motif;; Galactose oxidase, central domain;; Galactose oxidase, central domain;; BTB And C-terminal Kelch;; Kelch motif	Kelch-like protein 22 GN=klhl22 OS=Xenopus tropicalis (Western clawed frog) PE=2 SV=1	T	Signal transduction mechanisms	PREDICTED: kelch-like protein 22 isoform X3 [Gallus gallus]
gene16908	936	846	1077	1026	981	1551	2361	2176	1640	1574	5.59146	4.5907	5.95538	4.796	5.14546	11.281	12.4751	13.1291	11.4871	9.36734	5.41405e-07	1.44115	up	[R]	General function prediction only	Molecular Function: nucleotide binding (GO:0000166);; Cellular Component: nucleus (GO:0005634);; Cellular Component: cytoplasm (GO:0005737);; Cellular Component: polysome (GO:0005844);; Biological Process: central nervous system development (GO:0007417);; Molecular Function: poly(U) RNA binding (GO:0008266);;	K14411|0|phi:102109538|K14411 RNA-binding protein Musashi | (RefSeq) MSI1; musashi RNA binding protein 1	mRNA surveillance pathway (ko03015)	[A]	RNA processing and modification	RNA recognition motif. (a.k.a. RRM, RBD, or RNP domain);; RNA recognition motif (a.k.a. RRM, RBD, or RNP domain);; RNA recognition motif. (a.k.a. RRM, RBD, or RNP domain)	DAZ-associated protein 1 GN=dazap1 OS=Xenopus laevis (African clawed frog) PE=1 SV=1	A	RNA processing and modification	PREDICTED: RNA-binding protein Musashi homolog 1 isoform X5 [Chrysemys picta bellii]
gene17055	829	584	532	886	828	1023	1527	1113	861	1122	9.72921	6.24757	5.62461	8.22495	9.50229	14.1671	15.5261	12.9999	11.9231	13.0614	0.000776961	1.11253	up	--	--	--	K20462|2.73101e-126|mgp:100548358|K20462 oxysterol-binding protein 2 | (RefSeq) OSBP2; oxysterol binding protein 2	--	[I]	Lipid transport and metabolism	Oxysterol-binding protein	--	T	Signal transduction mechanisms	PREDICTED: oxysterol-binding protein 2 [Meleagris gallopavo]
gene17260	634	935	757	1154	718	1144	1799	1486	1253	1563	6.85018	9.23003	7.19462	9.89676	6.79621	14.2397	14.5589	15.198	15.7223	16.5241	2.30254e-05	1.29922	up	--	--	--	K01276|0|gga:417297|K01276 dipeptidyl-peptidase II [EC:3.4.14.2] | (RefSeq) DPP7; dipeptidyl peptidase 7	--	[OR]	Posttranslational modification, protein turnover, chaperones;; General function prediction only	Serine carboxypeptidase S28;; Alpha/beta hydrolase family	--	O	Posttranslational modification, protein turnover, chaperones	PREDICTED: dipeptidyl peptidase 2 [Gallus gallus]
gene17386	40031	53529	40455	66576	40784	61131	75001	73981	67442	85975	894.269	1198.91	881.365	1307.11	905.662	1726.03	1552.77	1618.77	1818.47	2035.56	0.00377933	1.10833	up	[F]	Nucleotide transport and metabolism	Cellular Component: outer dense fiber (GO:0001520);; Molecular Function: adenylate kinase activity (GO:0004017);; Molecular Function: nucleoside diphosphate kinase activity (GO:0004550);; Molecular Function: ATP binding (GO:0005524);; Cellular Component: cytoplasm (GO:0005737);; Cellular Component: plasma membrane (GO:0005886);; Biological Process: nucleoside diphosphate phosphorylation (GO:00061…	K00939|1.60454e-136|gga:396002|K00939 adenylate kinase [EC:2.7.4.3] | (RefSeq) AK1; adenylate kinase 1	Purine metabolism (ko00230)	[F]	Nucleotide transport and metabolism	Adenylate kinase;; AAA domain;; AAA domain;; AAA domain	Adenylate kinase isoenzyme 1 {ECO:0000255|HAMAP-Rule:MF_03171} OS=Gallus gallus (Chicken) PE=1 SV=1	F	Nucleotide transport and metabolism	PREDICTED: adenylate kinase isoenzyme 1 isoform X1 [Meleagris gallopavo]
gene17459	3622	1549	3179	3883	3427	4797	6195	4677	4518	4020	15.4071	5.96303	12.1432	12.9678	14.1414	23.8908	22.6561	19.6538	22.5019	16.8587	0.000229916	1.14222	up	--	--	--	--	--	--	--	--	--	S	Function unknown	PREDICTED: protein FAM78A [Gallus gallus]
gene1749	1133	1591	1299	1451	1023	2626	3428	4036	1986	3244	8.18667	10.0554	8.52967	7.76029	6.44275	22.8584	29.2695	31.7398	17.942	21.7195	1.32368e-10	1.73671	up	[F]	Nucleotide transport and metabolism	Molecular Function: phosphoribosylamine-glycine ligase activity (GO:0004637);; Molecular Function: phosphoribosylformylglycinamidine cyclo-ligase activity (GO:0004641);; Molecular Function: phosphoribosylglycinamide formyltransferase activity (GO:0004644);; Molecular Function: ATP binding (GO:0005524);; Cellular Component: cytosol (GO:0005829);; Biological Process: 'de novo' IMP biosynthetic proc…	K11787|0|gga:395315|K11787 phosphoribosylamine--glycine ligase / phosphoribosylglycinamide formyltransferase / phosphoribosylformylglycinamidine cyclo-ligase [EC:6.3.4.13 2.1.2.2 6.3.3.1] | (RefSeq) GART, AIRS, GARS, GART-A; phosphoribosylglycinamide formyltransferase, phosphoribosylglycinamide synthetase, phosphoribosylaminoimidazole synthetase	Purine metabolism (ko00230);; One carbon pool by folate (ko00670)	[F]	Nucleotide transport and metabolism	Phosphoribosylglycinamide synthetase, ATP-grasp (A) domain;; Formyl transferase;; Phosphoribosylglycinamide synthetase, N domain;; AIR synthase related protein, C-terminal domain;; Phosphoribosylglycinamide synthetase, C domain;; AIR synthase related protein, N-terminal domain;; ATP-grasp domain;; ATP-grasp domain	Phosphoribosylglycinamide formyltransferase GN=GART OS=Gallus gallus (Chicken) PE=2 SV=1	F	Nucleotide transport and metabolism	glycinamide ribonucleotide synthetase-aminoimidazole ribonucleotide synthetase-glycinamide ribonucleotide transformylase [Gallus gallus]
gene17515	2904	1325	6161	5006	5156	6036	10131	11659	7433	7308	10.4277	4.34169	19.9851	14.204	18.0882	25.5432	30.8538	41.1729	31.4287	25.5809	9.67634e-06	1.56495	up	--	--	Biological Process: negative regulation of transcription from RNA polymerase II promoter (GO:0000122);; Cellular Component: nuclear chromatin (GO:0000790);; Biological Process: in utero embryonic development (GO:0001701);; Biological Process: maternal placenta development (GO:0001893);; Molecular Function: steroid hormone receptor activity (GO:0003707);; Molecular Function: 9-cis retinoic acid re…	K08524|0|gga:417143|K08524 retinoid X receptor alpha | (RefSeq) RXRA; retinoid X receptor alpha	PPAR signaling pathway (ko03320);; Adipocytokine signaling pathway (ko04920)	[T]	Signal transduction mechanisms	Ligand-binding domain of nuclear hormone receptor;; Nuclear/hormone receptor activator site AF-1;; Zinc finger, C4 type (two domains)	Retinoic acid receptor RXR-alpha GN=rxra OS=Xenopus laevis (African clawed frog) PE=1 SV=1	K	Transcription	PREDICTED: retinoic acid receptor RXR-alpha isoform X1 [Haliaeetus leucocephalus]
gene17554	6133	4552	5958	5620	4875	11697	16568	11494	8403	6344	56.5828	38.5088	49.4843	41.0163	43.9884	125.478	132.475	104.543	90.8276	57.0241	0.000220688	1.51681	up	--	--	Cellular Component: Golgi apparatus (GO:0005794);; Cellular Component: plasma membrane (GO:0005886);; Biological Process: protein ubiquitination (GO:0016567);;	K12174|0|gga:427754|K12174 Kip1 ubiquitination-promoting complex protein 2 | (RefSeq) UBAC1, UBADC1; UBA domain containing 1	--	--	--	UBA/TS-N domain	Ubiquitin-associated domain-containing protein 1 GN=UBAC1 OS=Gallus gallus (Chicken) PE=2 SV=1	S	Function unknown	PREDICTED: ubiquitin-associated domain-containing protein 1 isoform X1 [Haliaeetus leucocephalus]
gene17583	5330	4083	6244	4780	5077	7668	11063	7974	5885	4419	12.1862	8.31062	12.7317	8.47842	10.8234	20.2307	21.874	17.9041	15.62	9.68402	0.00675511	1.04539	up	--	--	Molecular Function: DNA binding (GO:0003677);; Molecular Function: zinc ion binding (GO:0008270);; Cellular Component: cell surface (GO:0009986);; Cellular Component: membrane (GO:0016020);;	K15690|0|gga:417109|K15690 RING finger and CCCH-type zinc finger domain-containing protein | (RefSeq) RC3H2, MNAB; ring finger and CCCH-type domains 2	--	[O]	Posttranslational modification, protein turnover, chaperones	Zinc finger C-x8-C-x5-C-x3-H type (and similar)	Roquin-1 GN=rc3h1 OS=Xenopus laevis (African clawed frog) PE=2 SV=1	O	Posttranslational modification, protein turnover, chaperones	PREDICTED: RING finger and CCCH-type zinc finger domain-containing protein 2 isoform X5 [Gallus gallus]
gene17589	1582	1211	1027	731	2032	2771	2389	3508	1768	1615	6.88481	4.55414	5.64499	3.57608	5.77428	11.4136	9.05379	15.9342	13.0467	8.84802	0.00745077	1.35932	up	--	--	Molecular Function: DNA binding (GO:0003677);; Molecular Function: double-stranded RNA binding (GO:0003725);; Molecular Function: single-stranded RNA binding (GO:0003727);; Cellular Component: nucleus (GO:0005634);; Cellular Component: cytoplasm (GO:0005737);; Biological Process: movement of cell or subcellular component (GO:0006928);; Biological Process: multicellular organism development (GO:00…	K13200|0|gga:417105|K13200 spermatid perinuclear RNA-binding protein | (RefSeq) STRBP; spermatid perinuclear RNA binding protein	--	[R]	General function prediction only	DZF domain;; Double-stranded RNA binding motif;; double strand RNA binding domain from DEAD END PROTEIN 1	Spermatid perinuclear RNA-binding protein GN=STRBP OS=Gallus gallus (Chicken) PE=2 SV=1	K	Transcription	PREDICTED: spermatid perinuclear RNA-binding protein isoform X8 [Meleagris gallopavo]
gene17656	2110	2710	2438	1445	928	2619	3899	2994	1385	3188	13.0918	16.293	12.5361	7.14745	5.12658	19.3742	23.9979	16.8643	10.0478	17.9173	0.00343764	1.02325	up	[R]	General function prediction only	Molecular Function: nucleic acid binding (GO:0003676);; Molecular Function: metal ion binding (GO:0046872);;	--	--	[R]	General function prediction only	Zinc-finger double domain;; Zinc finger, C2H2 type;; C2H2-type zinc finger;; Zinc-finger double-stranded RNA-binding;; C2H2-type zinc finger;; CpXC protein;; KRAB box	Oocyte zinc finger protein XlCOF7.1 (Fragment) OS=Xenopus laevis (African clawed frog) PE=2 SV=1	K	Transcription	PREDICTED: zinc finger protein 502-like isoform X3 [Gallus gallus]
gene17669	416837	140166	369605	329105	381220	772926	772056	247073	465139	711514	1083.21	614.462	1158.38	1355.03	1368.4	7159.1	5337.41	2854.41	5158.2	4887.13	0.0122443	1.35016	up	[Z]	Cytoskeleton	Molecular Function: motor activity (GO:0003774);; Molecular Function: actin binding (GO:0003779);; Molecular Function: ATP binding (GO:0005524);; Cellular Component: myosin complex (GO:0016459);;	K10352|0|gga:374069|K10352 myosin heavy chain | (RefSeq) MYH1B, MYH3; myosin, heavy chain 1B, skeletal muscle (similar to human myosin, heavy chain 1, skeletal muscle, adult)	Tight junction (ko04530)	[Z]	Cytoskeleton	Myosin tail;; Myosin head (motor domain);; Myosin N-terminal SH3-like domain	Myosin heavy chain, skeletal muscle, adult OS=Gallus gallus (Chicken) PE=1 SV=4	Z	Cytoskeleton	myosin-3 [Gallus gallus]
gene17671	1246	47	30	145	215	36532	125586	17571	23847	36590	31.9973	0.635819	0.368646	0.428167	2.71611	459.505	615.301	440.593	657.165	637.988	7.00801e-06	7.50611	up	[Z]	Cytoskeleton	Molecular Function: motor activity (GO:0003774);; Molecular Function: actin binding (GO:0003779);; Molecular Function: calmodulin binding (GO:0005516);; Molecular Function: ATP binding (GO:0005524);; Cellular Component: myofibril (GO:0030016);; Cellular Component: myosin filament (GO:0032982);;	K10352|0|gga:427788|K10352 myosin heavy chain | (RefSeq) MYH1E; myosin, heavy chain 1E, skeletal muscle (similar to human myosin, heavy chain 1, skeletal muscle, adult)	Tight junction (ko04530)	[Z]	Cytoskeleton	Myosin tail;; Myosin head (motor domain);; Myosin N-terminal SH3-like domain	Myosin heavy chain, skeletal muscle, adult OS=Gallus gallus (Chicken) PE=1 SV=4	Z	Cytoskeleton	myosin heavy chain [Gallus gallus]
gene17674	104223	98395	156125	119833	165088	586977	507873	897969	529025	271285	458.939	398.608	584.295	475.704	805.421	4088.46	3156.04	3515.88	5209.2	2255.83	3.94724e-05	2.65659	up	[Z]	Cytoskeleton	--	K10352|0|gga:427789|K10352 myosin heavy chain | (RefSeq) MYH1G, N101; myosin, heavy chain 1G, skeletal muscle (similar to human myosin, heavy chain 1, skeletal muscle, adult)	Tight junction (ko04530)	[Z]	Cytoskeleton	Myosin tail;; Myosin head (motor domain);; Myosin N-terminal SH3-like domain	Myosin heavy chain, skeletal muscle, adult OS=Gallus gallus (Chicken) PE=1 SV=4	Z	Cytoskeleton	PREDICTED: myosin heavy chain, skeletal muscle, adult isoform X1 [Gallus gallus]
gene17721	1791	1668	2033	1895	1521	2863	3599	2604	2185	2011	8.96854	7.96801	9.43206	7.37748	7.23205	16.2998	15.2126	12.717	12.4419	10.2299	0.000280078	1.09161	up	[OZ]	Posttranslational modification, protein turnover, chaperones;; Cytoskeleton	Molecular Function: GTPase activator activity (GO:0005096);; Biological Process: post-chaperonin tubulin folding pathway (GO:0007023);; Biological Process: negative regulation of microtubule polymerization (GO:0031115);; Biological Process: positive regulation of GTPase activity (GO:0043547);; Molecular Function: beta-tubulin binding (GO:0048487);;	--	--	[O]	Posttranslational modification, protein turnover, chaperones	Tubulin folding cofactor D C terminal;; HEAT repeat;; HEAT-like repeat	Tubulin-specific chaperone D GN=TBCD OS=Gallus gallus (Chicken) PE=2 SV=1	O	Posttranslational modification, protein turnover, chaperones	PREDICTED: tubulin-specific chaperone D [Meleagris gallopavo]
gene17735	3323	2553	2909	2801	2439	4732	5331	3964	3627	2941	13.654	9.56541	10.7563	9.10366	9.79068	22.9346	18.9775	16.2093	17.5909	11.9862	0.000611144	1.07284	up	[R]	General function prediction only	Molecular Function: lamin binding (GO:0005521);; Cellular Component: lamin filament (GO:0005638);;	--	--	[Y]	Nuclear structure	Iron only hydrogenase large subunit, C-terminal domain;; Iron hydrogenase small subunit	Nuclear prelamin A recognition factor GN=narf OS=Xenopus laevis (African clawed frog) PE=2 SV=1	Y	Nuclear structure	PREDICTED: nuclear prelamin A recognition factor isoform X2 [Gallus gallus]
gene17754	4926	5045	5128	5898	4579	7657	9905	7383	8249	5467	20.4932	19.1318	19.2037	19.4015	18.6124	37.5579	35.6796	30.5624	40.464	22.5515	0.000904876	1.12851	up	--	--	Biological Process: kidney development (GO:0001822);; Biological Process: sprouting angiogenesis (GO:0002040);; Molecular Function: single-stranded RNA binding (GO:0003727);; Molecular Function: receptor activity (GO:0004872);; Molecular Function: iron ion binding (GO:0005506);; Cellular Component: nucleoplasm (GO:0005654);; Cellular Component: nucleolus (GO:0005730);; Cellular Component: plasma …	K11323|0|gga:417355|K11323 histone arginine demethylase JMJD6 [EC:1.14.11.-] | (RefSeq) JMJD6, PTDSR; jumonji domain containing 6	--	[BT]	Chromatin structure and dynamics;; Signal transduction mechanisms	JmjC domain, hydroxylase;; Cupin-like domain	Bifunctional arginine demethylase and lysyl-hydroxylase JMJD6 GN=JMJD6 OS=Gallus gallus (Chicken) PE=2 SV=1	K	Transcription	PREDICTED: bifunctional arginine demethylase and lysyl-hydroxylase JMJD6 isoform X1 [Haliaeetus leucocephalus]
gene1779	0	0	0	0	0	760	1023	1078	715	441	0	0	0	0	0	2.66886	3.04691	3.88415	2.88284	1.78114	8.47259e-51	Inf	up	--	--	--	--	--	--	--	--	--	--	--	PREDICTED: uncharacterized protein LOC101748821 [Gallus gallus]
gene1780	133	195	567	725	143	6558	8545	7723	6151	6123	0.359916	0.482947	1.38998	1.56182	0.379338	21.6671	21.2582	21.7305	21.5622	17.6599	3.64371e-60	4.899	up	--	--	Biological Process: negative regulation of transcription from RNA polymerase II promoter (GO:0000122);; Molecular Function: DNA binding (GO:0003677);; Molecular Function: transcription factor activity, sequence-specific DNA binding (GO:0003700);; Molecular Function: signal transducer activity (GO:0004871);; Cellular Component: nucleus (GO:0005634);; Biological Process: embryonic pattern specifica…	K09100|0|gga:418515|K09100 single-minded | (RefSeq) SIM2; single-minded family bHLH transcription factor 2	--	[K]	Transcription	Single-minded protein C-terminus;; PAS fold;; PAS domain;; PAS fold;; Helix-loop-helix DNA-binding domain	Single-minded homolog 1-A GN=sim1a OS=Danio rerio (Zebrafish) PE=2 SV=1	K	Transcription	PREDICTED: single-minded homolog 2 isoform X1 [Gallus gallus]
gene17809	542	907	647	629	515	743	1352	1192	1510	1008	2.84528	4.31189	3.0503	2.59793	2.6234	4.65271	6.12843	6.20347	9.28998	5.27139	0.00119638	1.3684	up	--	--	Biological Process: GPI anchor release (GO:0006507);; Biological Process: neural tube patterning (GO:0021532);; Biological Process: negative regulation of canonical Wnt signaling pathway (GO:0090090);;	K19882|0|phi:102099415|K19882 O-palmitoleoyl-L-serine hydrolase [EC:3.1.1.98] | (RefSeq) NOTUM; NOTUM, palmitoleoyl-protein carboxylesterase	Wnt signaling pathway (ko04310)	[M]	Cell wall/membrane/envelope biogenesis	Pectinacetylesterase	--	M	Cell wall/membrane/envelope biogenesis	PREDICTED: protein notum homolog [Pseudopodoces humilis]
gene17889	360	411	381	312	220	906	1013	865	353	589	1.9339	1.9047	1.7381	1.53621	1.1106	5.37979	4.45314	4.38301	2.11492	3.06364	0.000449667	1.64717	up	[GEPR]	Carbohydrate transport and metabolism;; Amino acid transport and metabolism;; Inorganic ion transport and metabolism;; General function prediction only	--	K08183|0|gga:417435|K08183 MFS transporter, MCP family, solute carrier family 16 (monocarboxylic acid transporters), member 6 | (RefSeq) SLC16A6; solute carrier family 16 member 6	--	[G]	Carbohydrate transport and metabolism	Major Facilitator Superfamily;; Sugar (and other) transporter	Monocarboxylate transporter 12 GN=slc16a12 OS=Xenopus tropicalis (Western clawed frog) PE=2 SV=1	G	Carbohydrate transport and metabolism	PREDICTED: monocarboxylate transporter 7 isoform X3 [Gallus gallus]
gene18057	162	125	175	93	199	386	147	473	288	355	1.29606	0.932626	1.15623	0.595331	1.65383	3.37279	1.02823	3.57986	2.60392	2.63568	0.00343764	1.64068	up	--	--	Biological Process: tRNA splicing, via endonucleolytic cleavage and ligation (GO:0006388);;	K15326|0|gga:422126|K15326 tRNA-splicing endonuclease subunit Sen54 | (RefSeq) TSEN54; tRNA splicing endonuclease subunit 54	--	[J]	Translation, ribosomal structure and biogenesis	tRNA-splicing endonuclease subunit sen54 N-term	--	J	Translation, ribosomal structure and biogenesis	PREDICTED: tRNA-splicing endonuclease subunit Sen54 isoform X2 [Gallus gallus]
gene18074	229	62	375	142	393	32346	44595	51255	36449	29177	5.14322	1.22372	7.7152	2.43983	8.55337	833.052	919.779	1113.06	939.291	655.004	1.62096e-70	7.82697	up	--	--	--	K10352|3.51082e-137|clv:102089597|K10352 myosin heavy chain | (RefSeq) myosin-8	Tight junction (ko04530)	[Z]	Cytoskeleton	Myosin tail	Myosin heavy chain, skeletal muscle, adult OS=Gallus gallus (Chicken) PE=1 SV=4	Z	Cytoskeleton	Myosin heavy chain, skeletal muscle, adult, partial [Columba livia]
gene18191	478	212	328	115	336	312	521	436	470	669	1.78525	0.694605	1.0846	0.337645	1.21067	1.36116	1.68962	1.62911	2.07956	2.42399	0.00914258	1.15821	up	--	--	--	--	--	--	--	Collagen triple helix repeat (20 copies);; EMI domain	--	W	Extracellular structures	PREDICTED: collagen alpha-1(XXVI) chain isoform X7 [Gallus gallus]
gene18251	360	357	386	380	296	782	957	1273	572	715	6.21547	5.37329	5.756	4.96586	4.94608	14.9089	13.4512	20.632	10.8707	11.4204	1.59429e-06	1.77982	up	--	--	--	K05357|4.51392e-124|gga:408253|K05357 vitamin-K-epoxide reductase (warfarin-sensitive) [EC:1.17.4.4] | (RefSeq) VKORC1L1; vitamin K epoxide reductase complex subunit 1 like 1	Ubiquinone and other terpenoid-quinone biosynthesis (ko00130)	--	--	Vitamin K epoxide reductase family	--	S	Function unknown	vitamin K epoxide reductase complex subunit 1-like protein 1 [Gallus gallus]
gene18314	4246	3277	5102	4141	4582	6651	10109	7634	5611	5508	14.2405	10.0137	15.3988	10.9774	15.0161	26.3052	29.3702	25.4831	22.1861	18.3078	8.08684e-05	1.23371	up	[K]	Transcription	Molecular Function: RNA binding (GO:0003723);; Biological Process: regulation of transcription from RNA polymerase II promoter (GO:0006357);; Molecular Function: hydrolase activity, acting on ester bonds (GO:0016788);; Biological Process: regulation of DNA-templated transcription, elongation (GO:0032784);;	K11292|0|gga:425418|K11292 transcription elongation factor SPT6 | (RefSeq) SUPT6H; SPT6 homolog, histone chaperone	--	[A]	RNA processing and modification	SH2 domain;; Holliday-junction resolvase-like of SPT6;; Death-like domain of SPT6;; Helix-hairpin-helix motif;; Helix-turn-helix DNA-binding domain of SPT6;; Acidic N-terminal SPT6;; Tex-like protein N-terminal domain;; SH2 domain;; Helix-hairpin-helix motif;; S1 RNA binding domain	Transcription elongation factor SPT6 GN=supt6h OS=Danio rerio (Zebrafish) PE=1 SV=1	A	RNA processing and modification	PREDICTED: transcription elongation factor SPT6 [Gallus gallus]
gene18315	291	410	364	484	428	695	1099	1177	861	958	2.1745	2.90177	2.45495	2.87271	3.13837	6.14319	7.18653	8.84263	7.67875	7.23587	1.35761e-07	1.78413	up	--	--	Molecular Function: phospholipase A2 activity (GO:0004623);; Molecular Function: calcium ion binding (GO:0005509);; Cellular Component: extracellular region (GO:0005576);; Biological Process: phospholipid metabolic process (GO:0006644);; Biological Process: lipid catabolic process (GO:0016042);;	K01047|1.0495e-85|gga:100858782|K01047 secretory phospholipase A2 [EC:3.1.1.4] | (RefSeq) PROCA1; protein interacting with cyclin A1	Glycerophospholipid metabolism (ko00564);; Ether lipid metabolism (ko00565);; Arachidonic acid metabolism (ko00590);; Linoleic acid metabolism (ko00591);; alpha-Linolenic acid metabolism (ko00592);; Vascular smooth muscle contraction (ko04270)	--	--	Phospholipase A2	Phospholipase A2 isozymes PA3A/PA3B/PA5 OS=Heloderma suspectum (Gila monster) PE=1 SV=3	I	Lipid transport and metabolism	PREDICTED: protein PROCA1, partial [Meleagris gallopavo]
gene18368	138	356	135	159	137	404	1292	218	369	767	1.7312	4.21021	1.55619	1.50488	1.65644	7.5133	14.8111	3.21208	5.93168	9.90158	0.0193692	2.15935	up	[E]	Amino acid transport and metabolism	Molecular Function: hydrolase activity, acting on ester bonds (GO:0016788);; Molecular Function: hydrolase activity, acting on carbon-nitrogen (but not peptide) bonds, in linear amides (GO:0016811);;	K01437|0|gga:417609|K01437 aspartoacylase [EC:3.5.1.15] | (RefSeq) ASPA; aspartoacylase	Alanine, aspartate and glutamate metabolism (ko00250);; Histidine metabolism (ko00340)	--	--	Succinylglutamate desuccinylase / Aspartoacylase family	Aspartoacylase GN=aspa OS=Xenopus tropicalis (Western clawed frog) PE=2 SV=2	R	General function prediction only	PREDICTED: aspartoacylase isoform X4 [Gallus gallus]
gene18426	1635	1824	2017	1578	1798	2102	3948	2930	2166	1636	4.77661	4.78136	5.25831	3.62354	5.06883	7.20119	9.90743	8.46013	7.37387	4.69922	0.00439776	1.02932	up	--	--	Molecular Function: obsolete ubiquitin thiolesterase activity (GO:0004221);; Molecular Function: calcium ion binding (GO:0005509);; Biological Process: ubiquitin-dependent protein catabolic process (GO:0006511);; Molecular Function: cysteine-type peptidase activity (GO:0008234);;	K11837|0|gga:417646|K11837 ubiquitin carboxyl-terminal hydrolase 6/32 [EC:3.4.19.12] | (RefSeq) USP32, USP6; ubiquitin specific peptidase 32	--	[O]	Posttranslational modification, protein turnover, chaperones	Ubiquitin carboxyl-terminal hydrolase;; DUSP domain;; Ubiquitin carboxyl-terminal hydrolase;; EF hand;; EF hand;; EF-hand domain;; EF-hand domain pair;; Ubiquitin-like domain	Ubiquitin carboxyl-terminal hydrolase 15 GN=usp15 OS=Xenopus tropicalis (Western clawed frog) PE=2 SV=2	O	Posttranslational modification, protein turnover, chaperones	PREDICTED: ubiquitin carboxyl-terminal hydrolase 32 isoform X4 [Gallus gallus]
gene18454	2826	2010	2278	2267	1986	3619	5827	3313	2939	3057	6.17032	5.54878	4.92368	4.09545	4.15487	7.41243	7.30584	6.39756	7.67332	8.02707	6.48107e-05	1.21375	up	[R]	General function prediction only	Molecular Function: nucleotide binding (GO:0000166);; Molecular Function: nucleic acid binding (GO:0003676);; Cellular Component: intracellular ribonucleoprotein complex (GO:0030529);;	K14411|0|xtr:100038158|K14411 RNA-binding protein Musashi | (RefSeq) msi2, Msi2h, musashi-2, musashi2, xrp1; musashi RNA binding protein 2	mRNA surveillance pathway (ko03015)	[A]	RNA processing and modification	RNA recognition motif. (a.k.a. RRM, RBD, or RNP domain);; RNA recognition motif (a.k.a. RRM, RBD, or RNP domain);; RNA recognition motif. (a.k.a. RRM, RBD, or RNP domain)	Heterogeneous nuclear ribonucleoprotein D-like GN=hnrnpdl OS=Xenopus tropicalis (Western clawed frog) PE=2 SV=1	A	RNA processing and modification	PREDICTED: RNA-binding protein Musashi homolog 2 isoform X9 [Pelodiscus sinensis]
gene18477	479	399	591	371	814	969	1073	1191	1217	1955	3.88533	2.94941	4.32067	2.38151	6.45671	9.27859	7.54737	9.62415	11.6539	15.7431	6.76768e-09	1.73997	up	--	--	--	K16452|4.24967e-87|phi:102104655|K16452 coiled-coil domain-containing protein 92 | (RefSeq) coiled-coil domain-containing protein 92	--	--	--	Coiled-coil domain of unknown function	--	S	Function unknown	PREDICTED: coiled-coil domain-containing protein 92-like [Pseudopodoces humilis]
gene18563	71	102	11	0	0	104	129	109	71	85	0.341192	0.444989	0.044014	0	0	0.58519	0.536257	0.51845	0.400626	0.403667	0.0046808	1.8948	up	--	--	--	--	--	[S]	Function unknown	RNA pol II promoter Fmp27 protein domain;; Mitochondrial protein from FMP27;; Golgi-body localisation protein domain;; Mitochondrial protein from FMP27	--	S	Function unknown	PREDICTED: UPF0378 protein KIAA0100 homolog [Chaetura pelagica]
gene18633	6092	6682	7074	7114	5635	9123	10649	11786	9123	9752	82.9844	82.5202	85.8493	75.9986	72.1409	142.886	122.874	156.965	145.085	130.614	0.000781757	1.14713	up	[J]	Translation, ribosomal structure and biogenesis	Biological Process: in utero embryonic development (GO:0001701);; Biological Process: male germ cell proliferation (GO:0002176);; Molecular Function: translation initiation factor activity (GO:0003743);; Biological Process: translational initiation (GO:0006413);; Biological Process: male gonad development (GO:0008584);;	K03238|0|gga:395295|K03238 translation initiation factor 2 subunit 2 | (RefSeq) EIF2S2, EIF2B; eukaryotic translation initiation factor 2 subunit beta	RNA transport (ko03013)	[J]	Translation, ribosomal structure and biogenesis	Domain found in IF2B/IF5	--	J	Translation, ribosomal structure and biogenesis	eukaryotic translation initiation factor 2 subunit 2 [Gallus gallus]
gene18634	2050	2799	3816	2261	1551	3760	4378	7432	3440	6233	11.5412	17.6247	24.5521	11.4036	9.66504	26.5315	21.9803	51.7638	24.2716	44.6859	5.80296e-05	1.51947	up	--	--	--	K12895|1.96688e-143|fpg:101922924|K12895 heterogeneous nuclear ribonucleoprotein C-like 2 | (RefSeq) RALY; RALY heterogeneous nuclear ribonucleoprotein	--	[R]	General function prediction only	RNA recognition motif. (a.k.a. RRM, RBD, or RNP domain);; RNA recognition motif. (a.k.a. RRM, RBD, or RNP domain);; RNA recognition motif (a.k.a. RRM, RBD, or RNP domain)	RNA-binding Raly-like protein GN=ralyl OS=Xenopus tropicalis (Western clawed frog) PE=2 SV=1	A	RNA processing and modification	PREDICTED: RNA-binding protein Raly isoform X9 [Gallus gallus]
gene18691	226	168	298	190	129	454	831	560	575	302	0.946816	0.640321	1.12262	0.626586	0.525458	2.24278	3.01534	2.33236	2.84072	1.25131	1.77339e-05	1.95479	up	--	--	Cellular Component: cytoplasm (GO:0005737);;	--	--	--	--	EMI domain	--	R	General function prediction only	PREDICTED: EMILIN-3 [Gallus gallus]
gene18765	1933	1821	1480	2034	1471	3518	3918	3003	2857	2316	7.46271	6.40859	5.14312	6.20878	5.54819	16.019	13.1	11.538	13.006	8.86691	2.18495e-06	1.36235	up	--	--	--	K07189|0|gga:419220|K07189 protein phosphatase 1 regulatory subunit 3A/B/C/D/E | (RefSeq) PPP1R3D; protein phosphatase 1 regulatory subunit 3D	Insulin signaling pathway (ko04910)	[OT]	Posttranslational modification, protein turnover, chaperones;; Signal transduction mechanisms	Putative phosphatase regulatory subunit	Protein phosphatase 1 regulatory subunit 3C-B GN=ppp1r3cb OS=Danio rerio (Zebrafish) PE=2 SV=1	T	Signal transduction mechanisms	PREDICTED: protein phosphatase 1 regulatory subunit 3D [Gallus gallus]
gene18972	4682	5457	5447	6398	5065	7976	12166	10076	7544	8856	40.1833	42.6675	42.0901	43.4266	42.4709	80.7328	90.4167	86.0298	76.36	75.3622	5.7869e-05	1.29034	up	[E]	Amino acid transport and metabolism	Molecular Function: aminopeptidase activity (GO:0004177);; Cellular Component: cytoplasm (GO:0005737);; Biological Process: proteolysis (GO:0006508);; Molecular Function: metalloexopeptidase activity (GO:0008235);; Molecular Function: manganese ion binding (GO:0030145);;	K09611|0|gga:419314|K09611 probable aminopeptidase NPEPL1 [EC:3.4.11.-] | (RefSeq) NPEPL1; aminopeptidase-like 1	--	[R]	General function prediction only	Cytosol aminopeptidase family, catalytic domain	Cytosol aminopeptidase GN=lap3 OS=Xenopus tropicalis (Western clawed frog) PE=2 SV=1	R	General function prediction only	PREDICTED: probable aminopeptidase NPEPL1 isoform X6 [Gallus gallus]
gene1898	3233	4704	3061	4188	3289	4261	6870	6343	5980	5941	57.4091	76.1534	48.9287	58.8067	57.0681	89.2149	105.647	112.079	125.229	104.607	0.0001612	1.17939	up	--	--	--	--	--	--	--	Thyroid hormone-inducible hepatic protein Spot 14	Mid1-interacting protein 1-B {ECO:0000312|ZFIN:ZDB-GENE-040426-1720} OS=Danio rerio (Zebrafish) PE=2 SV=1	S	Function unknown	MID1 interacting protein 1 [Gallus gallus]
gene19194	140	64	160	136	83	181	345	128	157	210	0.835838	0.317039	0.852257	0.62953	0.436515	1.27316	1.78652	0.765611	1.11761	1.22682	0.0408417	1.29843	up	--	--	Biological Process: release of cytochrome c from mitochondria (GO:0001836);; Molecular Function: p53 binding (GO:0002039);; Molecular Function: transcription factor activity, sequence-specific DNA binding (GO:0003700);; Cellular Component: nucleus (GO:0005634);; Cellular Component: cytoplasm (GO:0005737);; Biological Process: inflammatory response (GO:0006954);; Biological Process: cellular respo…	K10148|0|gga:419382|K10148 tumor protein p73 | (RefSeq) TP73; tumor protein p73	p53 signaling pathway (ko04115)	--	--	P53 DNA-binding domain;; P53 tetramerisation motif;; SAM domain (Sterile alpha motif)	Cellular tumor antigen p53 GN=tp53 OS=Oncorhynchus mykiss (Rainbow trout) PE=2 SV=1	K	Transcription	PREDICTED: tumor protein p73 isoform X6 [Gallus gallus]
gene19287	641	788	1092	1338	1330	1347	2039	1638	1085	1504	3.59124	3.87766	5.51968	6.22246	7.25952	9.17574	9.82429	9.22502	7.15723	8.30689	0.000773165	1.05328	up	--	--	Molecular Function: G-protein coupled receptor activity (GO:0004930);; Cellular Component: integral component of membrane (GO:0016021);;	K08467|7.09885e-167|gga:419439|K08467 G protein-coupled receptor 157 | (RefSeq) GPR157; G protein-coupled receptor 157	--	--	--	7 transmembrane receptor (Secretin family);; Slime mold cyclic AMP receptor	--	T	Signal transduction mechanisms	PREDICTED: probable G-protein coupled receptor 157 isoform X21 [Gallus gallus]
gene19297	814	828	881	823	838	1489	1793	1493	1315	1189	5.59638	5.20983	5.46183	4.49287	5.65055	12.1096	10.6538	10.2379	10.703	8.07366	1.97388e-05	1.31303	up	--	--	--	K06210|0|gga:101748948|K06210 nicotinamide mononucleotide adenylyltransferase [EC:2.7.7.1 2.7.7.18] | (RefSeq) NMNAT1; nicotinamide nucleotide adenylyltransferase 1	Nicotinate and nicotinamide metabolism (ko00760)	[H]	Coenzyme transport and metabolism	Cytidylyltransferase	Nicotinamide mononucleotide adenylyltransferase 2 GN=nmnat2 OS=Xenopus tropicalis (Western clawed frog) PE=2 SV=1	H	Coenzyme transport and metabolism	PREDICTED: nicotinamide mononucleotide adenylyltransferase 1 [Gallus gallus]
gene19363	2362	2092	2242	2153	1813	3729	6564	3092	2532	2676	10.9984	8.67385	9.27208	7.70931	8.25957	20.481	26.3288	13.7396	13.7691	12.0034	0.00617894	1.29175	up	[O]	Posttranslational modification, protein turnover, chaperones	Cellular Component: integral component of membrane (GO:0016021);; Biological Process: cell redox homeostasis (GO:0045454);;	K09536|0|gga:429208|K09536 DnaJ homolog subfamily C member 16 | (RefSeq) DNAJC16; DnaJ heat shock protein family (Hsp40) member C16	--	--	--	DnaJ domain;; Thioredoxin	DnaJ homolog subfamily C member 16 (Precursor) GN=DNAJC16 OS=Gallus gallus (Chicken) PE=2 SV=1	O	Posttranslational modification, protein turnover, chaperones	dnaJ homolog subfamily C member 16 precursor [Gallus gallus]
gene19390	14405	4375	14234	11592	12641	23484	14824	26566	10509	19175	53.8971	14.8699	47.8805	34.3408	46.1634	102.976	48.6883	98.5934	46.6986	70.9987	0.0206558	1.2291	up	--	--	Biological Process: blastocyst formation (GO:0001825);; Molecular Function: GTPase activity (GO:0003924);; Molecular Function: GTP binding (GO:0005525);; Cellular Component: mitochondrial outer membrane (GO:0005741);; Biological Process: obsolete GTP catabolic process (GO:0006184);; Biological Process: protein targeting to mitochondrion (GO:0006626);; Biological Process: mitochondrial membrane or…	K06030|0|mgp:100542450|K06030 mitofusin [EC:3.6.5.-] | (RefSeq) MFN2; mitofusin 2	--	[O]	Posttranslational modification, protein turnover, chaperones	fzo-like conserved region;; Dynamin family;; 50S ribosome-binding GTPase	--	O	Posttranslational modification, protein turnover, chaperones	PREDICTED: mitofusin-2 isoform X9 [Gallus gallus]
gene19410	106	159	262	222	149	1011	773	347	213	648	0.445303	0.607063	1.20446	0.832098	0.612323	5.48236	2.8184	1.45165	1.05363	2.70452	0.0165687	2.2636	up	--	--	--	--	--	--	--	Beta-lactamase	--	S	Function unknown	PREDICTED: putative beta-lactamase-like 1-like isoform X1 [Gallus gallus]
gene19803	3062	534	481	948	3440	3923	4121	3901	3329	3797	44.1121	6.99534	6.22112	10.7814	48.4287	66.6378	51.4037	55.9204	56.5399	54.2344	1.74784e-05	1.6123	up	--	--	--	--	--	--	--	Mitochondrial fission regulator	Mitochondrial fission regulator 1-like-A GN=mtfr1l-a OS=Xenopus laevis (African clawed frog) PE=2 SV=1	S	Function unknown	PREDICTED: family with sequence similarity 54, member B isoform X4 [Gallus gallus]
gene19809	339	195	215	165	488	498	667	471	188	847	2.63107	1.80304	1.95369	0.962168	3.51634	4.51933	5.05282	3.67626	1.13612	7.40386	0.00835824	1.33634	up	--	--	Molecular Function: ammonium transmembrane transporter activity (GO:0008519);; Cellular Component: integral component of membrane (GO:0016021);;	K06579|0|gga:395121|K06579 Rhesus blood group glycoprotein | (RefSeq) RHCE, RHD; Rh blood group CcEe antigens	--	[UR]	Intracellular trafficking, secretion, and vesicular transport;; General function prediction only	Ammonium Transporter Family	Ammonium transporter Rh type B GN=rhbg OS=Danio rerio (Zebrafish) PE=2 SV=1	P	Inorganic ion transport and metabolism	Rh blood group D antigen [Gallus gallus]
gene1985	1839	2306	2235	2030	1737	4402	6834	4693	2949	6717	11.5197	12.8673	12.7456	11.7043	10.5462	37.1739	42.8592	30.365	23.6482	47.2396	3.36212e-11	1.80705	up	--	--	Biological Process: cytoskeleton organization (GO:0007010);; Biological Process: regulation of cell shape (GO:0008360);; Biological Process: cell migration (GO:0016477);;	K12470|0|gga:418608|K12470 SH3 domain-containing kinase-binding protein 1 | (RefSeq) SH3KBP1; SH3 domain containing kinase binding protein 1	Endocytosis (ko04144)	[T]	Signal transduction mechanisms	Variant SH3 domain;; Variant SH3 domain;; SH3 domain;; SH3 domain;; Variant SH3 domain;; Variant SH3 domain	Intersectin-1 GN=itsn1 OS=Xenopus laevis (African clawed frog) PE=1 SV=1	T	Signal transduction mechanisms	PREDICTED: SH3 domain-containing kinase-binding protein 1 isoform X1 [Corvus cornix cornix]
gene19864	1184	1449	1236	1814	1483	2649	3353	2337	1707	2031	5.43857	6.06697	5.10769	6.58672	6.65565	14.3484	13.3356	10.6819	9.24376	9.24898	1.03306e-05	1.26352	up	--	--	--	K18668|0|gga:419618|K18668 ribonuclease ZC3H12 [EC:3.1.-.-] | (RefSeq) ZC3H12A; zinc finger CCCH-type containing 12A	--	[S]	Function unknown	Zc3h12a-like Ribonuclease NYN domain	NEDD4-binding protein 1 GN=n4bp1 OS=Xenopus laevis (African clawed frog) PE=2 SV=1	S	Function unknown	PREDICTED: ribonuclease ZC3H12A [Gallus gallus]
gene20048	274	694	137	213	185	1119	1830	1793	2151	3526	8.46853	19.5679	3.79492	5.19622	5.59207	40.8483	49.0649	55.2318	78.5306	111.518	2.01375e-10	3.26253	up	--	--	Molecular Function: calmodulin binding (GO:0005516);;	--	--	--	--	IQ calmodulin-binding motif	Neurogranin GN=NRGN OS=Serinus canaria (Island canary) PE=3 SV=1	T	Signal transduction mechanisms	putative neurogranin [Taeniopygia guttata]
gene20230	7524	6857	6812	3347	7248	19488	26269	25749	17907	18428	63.5607	54.5343	53.4861	22.5376	61.1568	171.955	200.34	246.709	186.997	162.37	5.64458e-13	2.24285	up	[G]	Carbohydrate transport and metabolism	Molecular Function: transporter activity (GO:0005215);; Cellular Component: integral component of membrane (GO:0016021);; Biological Process: transmembrane transport (GO:0055085);;	K08171|0|gga:419789|K08171 MFS transporter, OPA family, solute carrier family 37 (glycerol-6-phosphate transporter), member 4 | (RefSeq) SLC37A4; solute carrier family 37 member 4	--	[G]	Carbohydrate transport and metabolism	Major Facilitator Superfamily	Sugar phosphate exchanger 2 GN=slc37a2 OS=Xenopus tropicalis (Western clawed frog) PE=2 SV=1	G	Carbohydrate transport and metabolism	PREDICTED: glucose-6-phosphate translocase isoform 2 [Gallus gallus]
gene20684	2129	1857	1749	3534	1521	4462	8490	5021	5895	4715	10.7669	9.45911	10.0272	13.4237	8.6303	23.1444	31.1908	29.0769	29.9792	22.7474	5.19263e-09	1.93448	up	[Z]	Cytoskeleton	Molecular Function: GTPase activity (GO:0003924);; Molecular Function: structural constituent of cytoskeleton (GO:0005200);; Molecular Function: GTP binding (GO:0005525);; Cellular Component: cytoplasm (GO:0005737);; Cellular Component: microtubule (GO:0005874);; Biological Process: obsolete GTP catabolic process (GO:0006184);; Biological Process: microtubule-based process (GO:0007017);; Biologic…	K07374|0|apla:101797289|K07374 tubulin alpha | (RefSeq) TUBA1C; tubulin alpha-8 chain	Phagosome (ko04145);; Apoptosis (ko04210);; Gap junction (ko04540)	[Z]	Cytoskeleton	Tubulin/FtsZ family, GTPase domain;; Tubulin C-terminal domain	Tubulin alpha chain GN=tuba OS=Xenopus laevis (African clawed frog) PE=2 SV=2	Z	Cytoskeleton	PREDICTED: tubulin alpha-1C chain-like isoform X1 [Anas platyrhynchos]
gene20700	0	7	0	0	3	89	254	71	163	205	0	0.044497	0	0	0.008334	0.765832	1.635	0.490727	0.850403	0.863852	9.26576e-17	6.72176	up	--	--	Molecular Function: lamin binding (GO:0005521);; Biological Process: intermediate filament bundle assembly (GO:0045110);;	K10387|0|apla:101798848|K10387 plakophilin 1 | (RefSeq) PKP1; plakophilin 1	--	[TW]	Signal transduction mechanisms;; Extracellular structures	Armadillo/beta-catenin-like repeat;; HEAT repeats;; HEAT-like repeat	Catenin delta-1 GN=ctnnd1 OS=Xenopus laevis (African clawed frog) PE=1 SV=1	TW	Signal transduction mechanisms;; Extracellular structures	PREDICTED: plakophilin-1 isoform X4 [Gallus gallus]
gene20701	46	13	6	22	11	53920	97582	74298	63732	62644	0.099175	0.025101	0.011749	0.039844	0.02328	167.223	233.288	195.041	209.494	170.1	2.24958e-156	12.2786	up	--	--	--	--	--	[Z]	Cytoskeleton	Immunoglobulin I-set domain;; Fibronectin type III domain;; Immunoglobulin domain;; Immunoglobulin V-set domain;; Immunoglobulin domain;; Immunoglobulin domain;; Natural killer cell receptor 2B4;; Tissue factor;; CD80-like C2-set immunoglobulin domain	Myosin-binding protein C, fast-type GN=MYBPC2 OS=Gallus gallus (Chicken) PE=1 SV=3	T	Signal transduction mechanisms	PREDICTED: immunoglobulin-like and fibronectin type III domain containing 1 isoform X1 [Gallus gallus]
gene20702	32	51	20	40	14	115	179	75	149	147	0.339576	0.493825	0.191844	0.340715	0.145536	1.45541	1.65396	0.795362	1.88936	1.57909	3.98573e-05	2.6029	up	--	--	Cellular Component: lysosome (GO:0005764);; Cellular Component: integral component of membrane (GO:0016021);;	--	--	[S]	Function unknown	TMEM9	Putative protein 2 (Fragment) OS=Takifugu rubripes (Japanese pufferfish) PE=3 SV=1	S	Function unknown	PREDICTED: transmembrane protein 9 isoform X2 [Gallus gallus]
gene20704	2464	2920	2426	2485	2230	4187	6106	4778	4222	5919	34.603	37.2159	30.5726	27.3446	30.5022	69.0696	74.0845	66.5097	69.7428	82.2456	1.29375e-07	1.49952	up	--	--	--	--	--	--	--	--	--	S	Function unknown	transmembrane protein 183 [Gallus gallus]
gene20708	13913	33361	21485	11911	11811	41820	55571	70354	38019	38807	132.372	289.317	183.989	89.6006	109.793	469.107	457.786	665.971	426.496	366.058	5.50809e-07	1.91208	up	--	--	Biological Process: cell adhesion (GO:0007155);; Cellular Component: myosin filament (GO:0032982);;	--	--	--	--	Immunoglobulin I-set domain;; Fibronectin type III domain;; Immunoglobulin domain;; Immunoglobulin domain;; Immunoglobulin domain;; Tissue factor;; CD80-like C2-set immunoglobulin domain;; Immunoglobulin V-set domain;; Alphaherpesvirus glycoprotein I	Myosin-binding protein H GN=MYBPH OS=Gallus gallus (Chicken) PE=1 SV=1	Z	Cytoskeleton	myosin-binding protein H [Gallus gallus]
[truncated: 187 more rows]
