# Supplementary material for: Identification of Differentially Expressed Genes in Different Types of Broiler Skeletal Muscle Fibers Using the RNA-seq Technique
Source: Biomed Res Int. 2020 Jul 4;2020:9478949. doi: 10.1155/2020/9478949 (PMC7362283; doi:10.1155/2020/9478949)
Supplement: Supplementary Materials — Table S1: primer sequences for the genes selected for qRT-PCR. Table S2: DEGs identified under certain filter criteria. Table S3: GO enrichment analysis of DEGs. Table S4: KEGG pathway analysis of DEGs. [file 9478949.f1.zip › 9478949.f1/Table S3.xlsx]

## Sheet: Sheet1
#Domain	GO_ID	Term	Annotated	Significant	Expected	KS	Gene
Biological Process	GO:0006278	RNA-dependent DNA biosynthetic process	77	4	3.25	1e-30	Gallus_gallus_newGene_18494：LOC109365375，18494：up|Gallus_gallus_newGene_2075：AS27_14818，2075：up|Gallus_gallus_newGene_21552：N339_04974，21552：up|Gallus_gallus_newGene_47：LOC110391435，47：up
Molecular Function	GO:0003964	RNA-directed DNA polymerase activity	72	4	2.88	1e-30	Gallus_gallus_newGene_18494：LOC109365375，18494：up|Gallus_gallus_newGene_2075：AS27_14818，2075：up|Gallus_gallus_newGene_21552：N339_04974，21552：up|Gallus_gallus_newGene_47：LOC110391435，47：up
Cellular Component	GO:0070062	extracellular exosome	95	3	3.73	3.3e-28	Gallus_gallus_newGene_20049：TPI1，20049：up|gene10995：ACTA2，10995：down|gene3736：COL1A2，3736：down
Molecular Function	GO:0044822	RNA binding	75	1	3	9.4e-13	gene15682：G3BP1，15682：up
Molecular Function	GO:0042605	peptide antigen binding	37	0	1.48	2.3e-11	--
Biological Process	GO:0002474	antigen processing and presentation of peptide antigen via MHC class I	39	0	1.64	1.1e-10	--
Cellular Component	GO:0042612	MHC class I protein complex	34	0	1.33	2.9e-10	--
Biological Process	GO:0001916	positive regulation of T cell mediated cytotoxicity	32	0	1.35	1.6e-09	--
Molecular Function	GO:0003723	RNA binding	512	18	20.49	1.1e-07	Gallus_gallus_newGene_18494：LOC109365375，18494：up|Gallus_gallus_newGene_2075：AS27_14818，2075：up|Gallus_gallus_newGene_21552：N339_04974，21552：up|Gallus_gallus_newGene_47：LOC110391435，47：up|gene13590：MBNL1，13590：up|gene15468：etf1，15468：up|gene15682：G3BP1，15682：up|gene16328：RBFOX1，16328：down|gene16483：THUMPD1，16483：up|gene16908：MSI1，16908：up|gene17589：STRBP，17589：up|gene17754：JMJD6，17754：up|gene1831…
Cellular Component	GO:0005882	intermediate filament	213	2	8.35	1.4e-07	gene17735：NARF，17735：up|gene5776：BFSP1，5776：up
Molecular Function	GO:0005200	structural constituent of cytoskeleton	206	1	8.24	4.2e-07	gene20684：TUBA1C，20684：up
Biological Process	GO:0006096	glycolytic process	36	14	1.52	1.2e-06	Gallus_gallus_newGene_20049：TPI1，20049：up|Gallus_gallus_newGene_25321：LOC104917114，25321：up|gene1029：BPGM，1029：up|gene1084：LDHB，1084：down|gene11094：PGAM1，11094：up|gene1312：TPI1，1312：up|gene1374：TBX15，1374：down|gene13746：PKM，13746：up|gene14592：GPI，14592：up|gene23869：PFKM，23869：up|gene25417：ALDOA，25417：up|gene25858：ENO3，25858：up|gene3182：LDHB，3182：down|gene7816：PGK，7816：up|gene9514：LDHA，9514:up
Biological Process	GO:0007156	homophilic cell adhesion via plasma membrane adhesion molecules	110	2	4.64	2e-06	gene14627：CDH8，14627：up|gene7696：PCDH11X，7696：down
Biological Process	GO:0008360	regulation of cell shape	66	6	2.78	4.4e-06	Gallus_gallus_newGene_47：LOC110391435，47：up|gene16077：GNA12，16077：up|gene17915：CDC42EP4，17915：down|gene1985：SH3KBP1，1985：up|gene6062：RHOQ，6062：up|gene6283：RHOU，6283：up
Cellular Component	GO:0035102	PRC1 complex	11	0	0.43	4.5e-06	--
Molecular Function	GO:0003824	catalytic activity	3964	183	158.63	8.9e-06	Gallus_gallus_newGene_15489：CIB84_010615，15489：up|Gallus_gallus_newGene_16404：UBR4，16404：up|Gallus_gallus_newGene_18494：LOC109365375，18494：up|Gallus_gallus_newGene_20049：TPI1，20049：up|Gallus_gallus_newGene_2075：AS27_14818，2075：up|Gallus_gallus_newGene_21022：ALPK3，21022：up|Gallus_gallus_newGene_21069：PHKB，21069：up|Gallus_gallus_newGene_21552：N339_04974，21552：up|Gallus_gallus_newGene_23546：GYS1，235…
Biological Process	GO:0006958	complement activation, classical pathway	9	0	0.38	1.7e-05	--
Molecular Function	GO:0016788	hydrolase activity, acting on ester bonds	486	23	19.45	4.2e-05	gene11094：PGAM1，11094：up|gene16202：PGP，16202：up|gene18314：SUPT6H，18314：up|gene18315：PROCA1，18315：up|gene18368：ASPA，18368：up|gene18426：USP32，18426：up|gene19548：DUSP26，19548：down|gene2078：STS，2078：down|gene21821：PDE4C，21821：down|gene22606：PLCXD3，22606：down|gene23004：FBP2，23004：up|gene2920：GDPD5，2920：down|gene3674：PTER，3674：up|gene4634：IMPA2，4634：up|gene6055：SRBD1，6055：up|gene6074：PLB1，6074：down|gen…
Cellular Component	GO:0016020	membrane	3756	137	147.33	5.4e-05	Gallus_gallus_newGene_16404：UBR4，16404：up|Gallus_gallus_newGene_24651：LOC102114762，24651：up|Gallus_gallus_newGene_24723：LOC106899679，24723：up|Gallus_gallus_newGene_6113：ND5，6113：up|gene1001|gene10059：SYNDIG1L，10059：down|gene10097：TMEM63C，10097：down|gene10245：DLK1，10245：down|gene1037：RERG，1037：down|gene10757：SLC16A9，10757：up|gene10986：CXCL12，10986：down|gene11074：HPSE2，11074：up|gene11095：RRP12，1109…
Molecular Function	GO:0003725	double-stranded RNA binding	22	3	0.88	0.0002	gene13590：MBNL1，13590：up|gene17589：STRBP，17589：up|gene7037：DDX1，7037：up
Biological Process	GO:0090166	Golgi disassembly	7	1	0.3	0.00022	Gallus_gallus_newGene_47：LOC110391435，47：up
Molecular Function	GO:0072354	histone kinase activity (H3-T3 specific)	5	1	0.2	0.00032	Gallus_gallus_newGene_47：LOC110391435，47：up
Cellular Component	GO:0005739	mitochondrion	841	35	32.99	0.00034	Gallus_gallus_newGene_6113：ND5，6113：up|gene10074：NEK9，10074：up|gene1009|gene1067：BCAT1，1067：up|gene11190：GPAM，11190：down|gene11500：ERBB4，11500：up|gene11628：COQ10B，11628：up|gene1284：VAMP1，1284：up|gene14341：COQ9，14341：up|gene15800：ACSL6，15800：up|gene16319：TMEM186，16319：up|gene16745：ALDH2，16745：up|gene19390：MFN2，19390：up|gene19548：DUSP26，19548：down|gene20846：-，20846：down|gene21200：PDK2，21200：down|ge…
Biological Process	GO:0072355	histone H3-T3 phosphorylation	5	1	0.21	0.00037	Gallus_gallus_newGene_47：LOC110391435，47：up
Molecular Function	GO:0050660	flavin adenine dinucleotide binding	59	3	2.36	0.00041	gene11287：ACADSB，11287：up|gene11645：AOX1，11645：up|gene6871：MTO1，6871：up
Cellular Component	GO:0008305	integrin complex	16	2	0.63	0.0005	gene14180：ITGA11，14180：down|gene21172：ITGB3，21172：down
Molecular Function	GO:0008865	fructokinase activity	5	0	0.2	0.00062	--
Molecular Function	GO:0019158	mannokinase activity	5	0	0.2	0.00062	--
Molecular Function	GO:0004373	glycogen (starch) synthase activity	5	3	0.2	0.00064	Gallus_gallus_newGene_23546：GYS1，23546：up|gene25911：GYS1，25911：up|gene26487：GYS1，26487：up
Cellular Component	GO:0042613	MHC class II protein complex	10	0	0.39	0.00081	--
Cellular Component	GO:0045111	intermediate filament cytoskeleton	238	2	9.34	0.00087	gene17735：NARF，17735：up|gene5776：BFSP1，5776：up
Molecular Function	GO:0035173	histone kinase activity	26	1	1.04	0.00117	Gallus_gallus_newGene_47：LOC110391435，47：up
Biological Process	GO:0090501	RNA phosphodiester bond hydrolysis	8	0	0.34	0.00142	--
Biological Process	GO:1902307	positive regulation of sodium ion transmembrane transport	4	0	0.17	0.00156	--
Biological Process	GO:0000819	sister chromatid segregation	51	2	2.15	0.00157	gene16853：KLHL22，16853：up|gene16919：CIT，16919：down
Molecular Function	GO:0042802	identical protein binding	444	23	17.77	0.00159	gene1001|gene11500：ERBB4，11500：up|gene13174：ADIPOQ，13174：down|gene1374：TBX15，1374：down|gene14094：NR2F2，14094：down|gene14852：TNNC1，14852：up|gene16249：NDE1，16249：up|gene16320：ABAT，16320：up|gene17754：JMJD6，17754：up|gene17903：KCNJ2，17903：down|gene19194：TP73，19194：up|gene19557：ZNF703，19557：down|gene20915：UHRF1BP1，20915：up|gene21172：ITGB3，21172：down|gene21200：PDK2，21200：down|gene23869：PFKM，23869：up|gen…
Cellular Component	GO:0030486	smooth muscle dense body	4	0	0.16	0.00164	--
Molecular Function	GO:0031493	nucleosomal histone binding	6	1	0.24	0.00164	Gallus_gallus_newGene_47：LOC110391435，47：up
Cellular Component	GO:0030687	preribosome, large subunit precursor	5	0	0.2	0.00165	--
Biological Process	GO:0010501	RNA secondary structure unwinding	4	0	0.17	0.00177	--
Cellular Component	GO:0031209	SCAR complex	4	0	0.16	0.00177	--
Molecular Function	GO:0004161	dimethylallyltranstransferase activity	6	0	0.24	0.00181	--
Biological Process	GO:0043987	histone H3-S10 phosphorylation	8	1	0.34	0.00191	Gallus_gallus_newGene_47：LOC110391435，47：up
Molecular Function	GO:0005524	ATP binding	1006	45	40.26	0.00192	Gallus_gallus_newGene_15489：CIB84_010615，15489：up|Gallus_gallus_newGene_21022：ALPK3，21022：up|Gallus_gallus_newGene_47：LOC110391435，47：up|gene10074：NEK9，10074：up|gene10692：MAT1A，10692：up|gene10995：ACTA2，10995：down|gene11500：ERBB4，11500：up|gene13715：ALPK3，13715：up|gene1374：TBX15，1374：down|gene13746：PKM，13746：up|gene13841：DNAJA4，13841：down|gene1396：POLQ，1396：up|gene153|gene15705：CAMK2A，15705：down|ge…
Biological Process	GO:0045337	farnesyl diphosphate biosynthetic process	6	0	0.25	0.00211	--
Biological Process	GO:0045922	negative regulation of fatty acid metabolic process	7	1	0.3	0.00241	gene3532：INSIG1，3532：up
Molecular Function	GO:0008184	glycogen phosphorylase activity	6	3	0.24	0.00255	Gallus_gallus_newGene_25030：PYGM，25030：up|gene25608：PYGM，25608：up|gene25871：PYGM，25871：up
Molecular Function	GO:0005542	folic acid binding	6	0	0.24	0.00269	--
Biological Process	GO:0051084	'de novo' posttranslational protein folding	15	0	0.63	0.00271	--
Biological Process	GO:2000630	positive regulation of miRNA metabolic process	4	2	0.17	0.00275	gene9599：HRAS，9599：down|gene9602：HRAS，9602：down
Biological Process	GO:0010506	regulation of autophagy	39	2	1.64	0.00292	gene1206：TIGAR，1206：up|gene20951：TFEB，20951：up
Biological Process	GO:0097061	dendritic spine organization	10	1	0.42	0.00309	gene19414：EPHB2，19414：down
Molecular Function	GO:0004340	glucokinase activity	6	0	0.24	0.00314	--
Biological Process	GO:0010975	regulation of neuron projection development	97	7	4.09	0.00318	gene14973：SEMA3F，14973：down|gene153|gene16919：CIT，16919：down|gene19414：EPHB2，19414：down|gene373|gene5849：TTL，gene5849：up|gene7634：FRMD7，7634：up
Biological Process	GO:0055114	oxidation-reduction process	379	32	15.98	0.00323	Gallus_gallus_newGene_20049：TPI1，20049：up|Gallus_gallus_newGene_21069：PHKB，21069：up|Gallus_gallus_newGene_23546：GYS1，23546：up|Gallus_gallus_newGene_24723：LOC106899679，24723：up|Gallus_gallus_newGene_25030：PYGM，25030：up|Gallus_gallus_newGene_6113：ND5，6113：up|gene10010：EGLN3，10010：up|gene10380：DHRS7，10380：down|gene1084：LDHB，1084：down|gene11915：PRKAG3，11915：up|gene1312：TPI1，1312：up|gene13174：ADIPOQ，1…
Biological Process	GO:0071493	cellular response to UV-B	6	1	0.25	0.00338	gene12303：CRIP1，12303：down
Biological Process	GO:2000344	positive regulation of acrosome reaction	8	0	0.34	0.0034	--
Molecular Function	GO:0003876	AMP deaminase activity	5	2	0.2	0.00355	gene20891：AMPD1，gene20891：up|gene20997：AMPD1，20997：up
Cellular Component	GO:0005819	spindle	123	2	4.82	0.00357	gene16249：NDE1，16249：up|gene16853：KLHL22，16853：up
Molecular Function	GO:0004459	L-lactate dehydrogenase activity	3	3	0.12	0.00362	gene1084：LDHB，1084：down|gene3182：LDHB，3182：down|gene9514：LDHA，9514:up
Biological Process	GO:0032264	IMP salvage	5	2	0.21	0.00366	gene20891：AMPD1，gene20891：up|gene20997：AMPD1，20997：up
Biological Process	GO:0035023	regulation of Rho protein signal transduction	86	5	3.63	0.0038	gene13065：ARHGEF4，13065：up|gene23329：LPAR1,23329：down|gene8406：EPHA5，8406：down|gene9599：HRAS，9599：down|gene9602：HRAS，9602：down
Cellular Component	GO:0016021	integral component of membrane	2153	76	84.45	0.00395	Gallus_gallus_newGene_24651：LOC102114762，24651：up|Gallus_gallus_newGene_24723：LOC106899679，24723：up|Gallus_gallus_newGene_6113：ND5，6113：up|gene1001|gene10059：SYNDIG1L，10059：down|gene10757：SLC16A9，10757：up|gene11095：RRP12，11095：up|gene11167：SORCS3，11167：down|gene11500：ERBB4，11500：up|gene11523：RAMP1，11523：down|gene11768：GPR155，11768：up|gene11853：KCNH7，11853：down|gene12519：TLCD4，12519：up|gene12522：S…
Molecular Function	GO:0008483	transaminase activity	16	2	0.64	0.0045	gene1067：BCAT1，1067：up|gene16320：ABAT，16320：up
Biological Process	GO:1902017	regulation of cilium assembly	5	0	0.21	0.00458	--
Molecular Function	GO:0016491	oxidoreductase activity	515	24	20.61	0.00462	Gallus_gallus_newGene_24723：LOC106899679，24723：up|Gallus_gallus_newGene_6113：ND5，6113：up|gene10010：EGLN3，10010：up|gene10380：DHRS7，10380：down|gene1084：LDHB，1084：down|gene11287：ACADSB，11287：up|gene11645：AOX1，11645：up|gene12027：STEAP3，12027：up|gene15663：FAXDC2，15663：down|gene16135：ALKBH5，gene16135：up|gene16745：ALDH2，16745：up|gene16979：LOC417013，16979：down|gene17754：JMJD6，17754：up|gene17803：DCXR，1780…
Biological Process	GO:0006084	acetyl-CoA metabolic process	11	3	0.46	0.00463	gene21200：PDK2，21200：down|gene24885：PDK2，24885：down|gene3742：PDK4，3742：down
Cellular Component	GO:0030314	junctional membrane complex	10	2	0.39	0.00467	gene14698：JPH3，14698：up|gene14699：JPH3，14699：up
Molecular Function	GO:0004807	triose-phosphate isomerase activity	3	2	0.12	0.00474	Gallus_gallus_newGene_20049：TPI1，20049：up|gene1312：TPI1，1312：up
Biological Process	GO:0050821	protein stabilization	36	0	1.52	0.00477	--
Molecular Function	GO:0070330	aromatase activity	5	0	0.2	0.00479	--
Biological Process	GO:0000959	mitochondrial RNA metabolic process	8	1	0.34	0.00485	gene6871：MTO1，6871：up
Biological Process	GO:0006379	mRNA cleavage	9	0	0.38	0.00506	--
Biological Process	GO:2000121	regulation of removal of superoxide radicals	4	2	0.17	0.0051	gene186|gene3070：CD36，3070：down
Molecular Function	GO:0031994	insulin-like growth factor I binding	5	0	0.2	0.00515	--
Molecular Function	GO:0035175	histone kinase activity (H3-S10 specific)	7	1	0.28	0.00529	Gallus_gallus_newGene_47：LOC110391435，47：up
Cellular Component	GO:0000177	cytoplasmic exosome (RNase complex)	5	0	0.2	0.00536	--
Cellular Component	GO:0005654	nucleoplasm	456	8	17.89	0.00537	Gallus_gallus_newGene_16404：UBR4，16404：up|Gallus_gallus_newGene_47：LOC110391435，47：up|gene11985：EAF2，1985：up|gene1374：TBX15，1374：down|gene16135：ALKBH5，gene16135：up|gene17754：JMJD6，17754：up|gene19557：ZNF703，19557：down|gene7037：DDX1，7037：up
Molecular Function	GO:0016772	transferase activity, transferring phosphorus-containing groups	781	34	31.25	0.00543	Gallus_gallus_newGene_18494：LOC109365375，18494：up|Gallus_gallus_newGene_2075：AS27_14818，2075：up|Gallus_gallus_newGene_21022：ALPK3，21022：up|Gallus_gallus_newGene_21069：PHKB，21069：up|Gallus_gallus_newGene_21552：N339_04974，21552：up|Gallus_gallus_newGene_47：LOC110391435，47：up|gene10074：NEK9，10074：up|gene11500：ERBB4，11500：up|gene13715：ALPK3，13715：up|gene1374：TBX15，1374：down|gene13746：PKM，13746：up|gene…
Biological Process	GO:0031333	negative regulation of protein complex assembly	40	5	1.69	0.00546	gene17721：TBCD，17721：up|gene3532：INSIG1，3532：up|gene3776：SCIN，3776：down|gene4085：TBX20，4085：down|gene954：MTPN，954：down
Molecular Function	GO:0003779	actin binding	153	15	6.12	0.00546	Gallus_gallus_newGene_15489：CIB84_010615，15489：up|gene13854：TPM1，13854：up|gene14852：TNNC1，14852：up|gene15599：DBN1，15599：down|gene17665：MYH1F，17665：down|gene17669：MYH1B，17669：up|gene17671：MYH1E，17671：up|gene17673：MYH1C，17673：down|gene19848：FHL3，19848：down|gene21920：CNN1，21920：down|gene22541：TPM2，22541：down|gene312：LMOD2，312：down|gene3776：SCIN，3776：down|gene8461：MYOZ2，8461：down|gene8674：LIMCH1，8674…
Biological Process	GO:0060996	dendritic spine development	13	1	0.55	0.00553	gene19414：EPHB2，19414：down
Biological Process	GO:0044262	cellular carbohydrate metabolic process	119	20	5.02	0.00554	Gallus_gallus_newGene_20049：TPI1，20049：up|Gallus_gallus_newGene_21069：PHKB，21069：up|Gallus_gallus_newGene_23546：GYS1，23546：up|Gallus_gallus_newGene_25030：PYGM，25030：up|gene1084：LDHB，1084：down|gene11915：PRKAG3，11915：up|gene13174：ADIPOQ，13174：down|gene14526：PHKB，14526：up|gene15528：ADRA1B，15528：down|gene21200：PDK2，21200：down|gene24885：PDK2，24885：down|gene25911：GYS1，25911：up|gene26487：GYS1，26487：up|g…
Cellular Component	GO:0009897	external side of plasma membrane	85	7	3.33	0.00574	gene10245：DLK1，10245：down|gene10986：CXCL12，10986：down|gene13225：SERPINE2，13225：down|gene186|gene21172：ITGB3，21172：down|gene3070：CD36，3070：down|gene4734：AQP4，4734：up
Molecular Function	GO:0004337	geranyltranstransferase activity	7	0	0.28	0.00583	--
Biological Process	GO:0010745	negative regulation of macrophage derived foam cell differentiation	8	1	0.34	0.00584	gene13174：ADIPOQ，13174：down
Molecular Function	GO:0030170	pyridoxal phosphate binding	50	6	2	0.00593	Gallus_gallus_newGene_25030：PYGM，25030：up|gene16320：ABAT，16320：up|gene25608：PYGM，25608：up|gene25871：PYGM，25871：up|gene3719：ACCS，3719：up|gene3942：GADL1，3942：up
Biological Process	GO:0016572	histone phosphorylation	30	1	1.27	0.00597	Gallus_gallus_newGene_47：LOC110391435，47：up
Biological Process	GO:0019934	cGMP-mediated signaling	5	2	0.21	0.00599	gene186|gene3070：CD36，3070：down
Molecular Function	GO:0070735	protein-glycine ligase activity	3	0	0.12	0.00606	--
Biological Process	GO:0006103	2-oxoglutarate metabolic process	8	0	0.34	0.00607	--
Cellular Component	GO:0005925	focal adhesion	62	2	2.43	0.00613	gene20894：SIKE1，20894：up|gene7147：EPHX2，7147：down
Molecular Function	GO:0004499	N,N-dimethylaniline monooxygenase activity	4	0	0.16	0.00629	--
Biological Process	GO:1902254	negative regulation of intrinsic apoptotic signaling pathway by p53 class mediator	3	0	0.13	0.00644	--
Biological Process	GO:0036353	histone H2A-K119 monoubiquitination	3	0	0.13	0.00644	--
Molecular Function	GO:0005242	inward rectifier potassium channel activity	11	1	0.44	0.0065	gene17903：KCNJ2，17903：down
Biological Process	GO:0046069	cGMP catabolic process	3	0	0.13	0.00656	--
Biological Process	GO:0000082	G1/S transition of mitotic cell cycle	57	4	2.4	0.00656	gene14694：FBXO31，14694：up|gene15705：CAMK2A，15705：down|gene6283：RHOU，6283：up|gene7663：FHL1，7663：down
Molecular Function	GO:0045735	nutrient reservoir activity	5	0	0.2	0.00661	--
Biological Process	GO:2000483	negative regulation of interleukin-8 secretion	3	0	0.13	0.00673	--
Biological Process	GO:0010324	membrane invagination	13	3	0.55	0.00688	gene11474：GULP1，11474：down|gene186|gene3070：CD36，3070：down
Biological Process	GO:0016246	RNA interference	9	0	0.38	0.00696	--
Molecular Function	GO:0043175	RNA polymerase core enzyme binding	12	0	0.48	0.00708	--
Biological Process	GO:1902806	regulation of cell cycle G1/S phase transition	30	2	1.27	0.00715	gene14694：FBXO31，14694：up|gene7663：FHL1，7663：down
Cellular Component	GO:0034673	inhibin-betaglycan-ActRII complex	4	0	0.16	0.00715	--
Cellular Component	GO:0031414	N-terminal protein acetyltransferase complex	3	0	0.12	0.00716	--
Biological Process	GO:0034375	high-density lipoprotein particle remodeling	8	0	0.34	0.0072	--
Biological Process	GO:0021879	forebrain neuron differentiation	29	2	1.22	0.00722	gene11500：ERBB4，11500：up|gene1950：ARX，1950：down
Molecular Function	GO:0015266	protein channel activity	3	0	0.12	0.00723	--
Biological Process	GO:0097581	lamellipodium organization	25	2	1.05	0.00752	gene13065：ARHGEF4，13065：up|gene13603：CLRN1，13603：up
Molecular Function	GO:0017025	TBP-class protein binding	8	0	0.32	0.00752	--
Cellular Component	GO:0005719	nuclear euchromatin	14	0	0.55	0.00761	--
Cellular Component	GO:0044444	cytoplasmic part	2825	118	110.81	0.00764	Gallus_gallus_newGene_15489：CIB84_010615，15489：up|Gallus_gallus_newGene_20049：TPI1，20049：up|Gallus_gallus_newGene_21069：PHKB，21069：up|Gallus_gallus_newGene_24723：LOC106899679，24723：up|Gallus_gallus_newGene_25030：PYGM，25030：up|Gallus_gallus_newGene_47：LOC110391435，47：up|Gallus_gallus_newGene_6113：ND5，6113：up|gene10059：SYNDIG1L，10059：down|gene10074：NEK9，10074：up|gene1009|gene1067：BCAT1，1067：up|gene…
Molecular Function	GO:0003823	antigen binding	40	0	1.6	0.00775	--
Biological Process	GO:1902188	positive regulation of viral release from host cell	3	0	0.13	0.00784	--
Biological Process	GO:0039702	viral budding via host ESCRT complex	3	0	0.13	0.00784	--
Biological Process	GO:1901673	regulation of mitotic spindle assembly	3	0	0.13	0.00784	--
Molecular Function	GO:0035197	siRNA binding	3	0	0.12	0.00791	--
Molecular Function	GO:0070551	endoribonuclease activity, cleaving siRNA-paired mRNA	3	0	0.12	0.00791	--
Molecular Function	GO:0031625	ubiquitin protein ligase binding	91	4	3.64	0.00803	Gallus_gallus_newGene_20049：TPI1，20049：up|gene19390：MFN2，19390：up|gene3743：ASB4，3743：up|gene9515：TSG101，9515：up：TSG101，9515：up
Molecular Function	GO:0070628	proteasome binding	8	0	0.32	0.00813	--
Molecular Function	GO:0015085	calcium ion transmembrane transporter activity	77	4	3.08	0.00813	gene14698：JPH3，14698：up|gene14699：JPH3，14699：up|gene9888：SLC8A3，9888：down|gene9947：RYR3，9947：up
Biological Process	GO:0009108	coenzyme biosynthetic process	60	7	2.53	0.00824	gene10692：MAT1A，10692：up|gene14341：COQ9，14341：up|gene21200：PDK2，21200：down|gene226|gene24885：PDK2，24885：down|gene3742：PDK4，3742：down|gene6090：MOCS1，6090：up
Cellular Component	GO:0070578	RISC-loading complex	3	0	0.12	0.00834	--
Biological Process	GO:0070198	protein localization to chromosome, telomeric region	5	0	0.21	0.00855	--
Biological Process	GO:0031134	sister chromatid biorientation	3	0	0.13	0.00861	--
Biological Process	GO:0035280	miRNA loading onto RISC involved in gene silencing by miRNA	3	0	0.13	0.00863	--
Molecular Function	GO:0045309	protein phosphorylated amino acid binding	14	0	0.56	0.00865	--
Biological Process	GO:1903047	mitotic cell cycle process	283	11	11.93	0.00866	gene10936：FBXL15，10936：up|gene14694：FBXO31，14694：up|gene15705：CAMK2A，15705：down|gene16249：NDE1，16249：up|gene16853：KLHL22，16853：up|gene16919：CIT，16919：down|gene6283：RHOU，6283：up|gene7663：FHL1，7663：down|gene8686：PDS5A，8686：up|gene9599：HRAS，9599：down|gene9602：HRAS，9602：down
Biological Process	GO:2000303	regulation of ceramide biosynthetic process	5	0	0.21	0.00869	--
Biological Process	GO:0034349	glial cell apoptotic process	5	0	0.21	0.00869	--
Biological Process	GO:1900027	regulation of ruffle assembly	4	2	0.17	0.00884	gene9599：HRAS，9599：down|gene9602：HRAS，9602：down
Cellular Component	GO:0030016	myofibril	101	10	3.96	0.00897	Gallus_gallus_newGene_15489：CIB84_010615，15489：up|gene10995：ACTA2，10995：down|gene14852：TNNC1，14852：up|gene17671：MYH1E，17671：up|gene17673：MYH1C，17673：down|gene1974：SMPX，1974：down|gene19848：FHL3，19848：down|gene23405：TMOD1，23405：down|gene453：CPM，453：down1|gene8461：MYOZ2，8461：down
Cellular Component	GO:0031674	I band	61	4	2.39	0.00903	gene10995：ACTA2，10995：down|gene19848：FHL3，19848：down|gene453：CPM，453：down1|gene8461：MYOZ2，8461：down
Biological Process	GO:0006782	protoporphyrinogen IX biosynthetic process	5	0	0.21	0.00908	--
Biological Process	GO:0009584	detection of visible light	10	0	0.42	0.0091	--
Biological Process	GO:2000601	positive regulation of Arp2/3 complex-mediated actin nucleation	3	0	0.13	0.00914	--
Molecular Function	GO:0002020	protease binding	23	1	0.92	0.00939	gene14238：FURIN，14238：up
Biological Process	GO:0051898	negative regulation of protein kinase B signaling	19	0	0.8	0.00977	--
Biological Process	GO:0007009	plasma membrane organization	68	1	2.87	0.00983	gene13174：ADIPOQ，13174：down
Molecular Function	GO:0042803	protein homodimerization activity	280	12	11.2	0.01004	gene11500：ERBB4，11500：up|gene13174：ADIPOQ，13174：down|gene1374：TBX15，1374：down|gene14094：NR2F2，14094：down|gene14852：TNNC1，14852：up|gene16320：ABAT，16320：up|gene21200：PDK2，21200：down|gene24320：NR4A1，24320：up|gene24885：PDK2，24885：down|gene4634：IMPA2，4634：up|gene6510：PEX7，6510：up|gene8492：PITX2，8492：down
Biological Process	GO:0007229	integrin-mediated signaling pathway	36	2	1.52	0.01006	gene14180：ITGA11，14180：down|gene21172：ITGB3，21172：down
Biological Process	GO:0046580	negative regulation of Ras protein signal transduction	15	1	0.63	0.01015	gene19390：MFN2，19390：up
Biological Process	GO:0051058	negative regulation of small GTPase mediated signal transduction	15	1	0.63	0.01015	gene19390：MFN2，19390：up
Cellular Component	GO:0042575	DNA polymerase complex	9	0	0.35	0.01017	--
Biological Process	GO:0044042	glucan metabolic process	38	9	1.6	0.01055	Gallus_gallus_newGene_21069：PHKB，21069：up|Gallus_gallus_newGene_23546：GYS1，23546：up|Gallus_gallus_newGene_25030：PYGM，25030：up|gene11915：PRKAG3，11915：up|gene14526：PHKB，14526：up|gene15528：ADRA1B，15528：down|gene25911：GYS1，25911：up|gene26487：GYS1，26487：up|gene6074：PLB1，6074：down
Biological Process	GO:0005977	glycogen metabolic process	38	9	1.6	0.01055	Gallus_gallus_newGene_21069：PHKB，21069：up|Gallus_gallus_newGene_23546：GYS1，23546：up|Gallus_gallus_newGene_25030：PYGM，25030：up|gene11915：PRKAG3，11915：up|gene14526：PHKB，14526：up|gene15528：ADRA1B，15528：down|gene25911：GYS1，25911：up|gene26487：GYS1，26487：up|gene6074：PLB1，6074：down
Biological Process	GO:0006073	cellular glucan metabolic process	38	9	1.6	0.01055	Gallus_gallus_newGene_21069：PHKB，21069：up|Gallus_gallus_newGene_23546：GYS1，23546：up|Gallus_gallus_newGene_25030：PYGM，25030：up|gene11915：PRKAG3，11915：up|gene14526：PHKB，14526：up|gene15528：ADRA1B，15528：down|gene25911：GYS1，25911：up|gene26487：GYS1，26487：up|gene6074：PLB1，6074：down
Biological Process	GO:0015914	phospholipid transport	13	0	0.55	0.01074	--
Biological Process	GO:0043331	response to dsRNA	19	1	0.8	0.01082	gene7037：DDX1，7037：up
Cellular Component	GO:0036464	cytoplasmic ribonucleoprotein granule	54	3	2.12	0.01095	gene13590：MBNL1，13590：up|gene15682：G3BP1，15682：up|gene7037：DDX1，7037：up
Cellular Component	GO:0035770	ribonucleoprotein granule	54	3	2.12	0.01095	gene13590：MBNL1，13590：up|gene15682：G3BP1，15682：up|gene7037：DDX1，7037：up
Molecular Function	GO:0048029	monosaccharide binding	22	2	0.88	0.01103	gene10010：EGLN3，10010：up|gene23869：PFKM，23869：up
Biological Process	GO:1990138	neuron projection extension	30	4	1.27	0.01107	gene12741：FOXD2，12741：down|gene14973：SEMA3F，14973：down|gene15491：SLIT3，15491：down|gene5849：TTL，gene5849：up
Biological Process	GO:0048675	axon extension	30	4	1.27	0.01107	gene12741：FOXD2，12741：down|gene14973：SEMA3F，14973：down|gene15491：SLIT3，15491：down|gene5849：TTL，gene5849：up
Biological Process	GO:0097190	apoptotic signaling pathway	115	7	4.85	0.01111	gene11724：ZNF385B，11724：down|gene12303：CRIP1，12303：down|gene19194：TP73，19194：up|gene21200：PDK2，21200：down|gene24885：PDK2，24885：down|gene9599：HRAS，9599：down|gene9602：HRAS，9602：down
Molecular Function	GO:0005506	iron ion binding	113	6	4.52	0.01125	gene10010：EGLN3，10010：up|gene11645：AOX1，11645：up|gene15663：FAXDC2，15663：down|gene17754：JMJD6，17754：up|gene2885：HBBA，2885：down|gene9508：TPH1，9508：up
Biological Process	GO:0071447	cellular response to hydroperoxide	3	2	0.13	0.01129	gene186|gene3070：CD36，3070：down
Cellular Component	GO:0042383	sarcolemma	39	1	1.53	0.01161	gene11571：COL6A2，11571：down
Biological Process	GO:0072657	protein localization to membrane	99	2	4.17	0.01163	gene13174：ADIPOQ，13174：down|gene2823：PAK1，2823：down
Biological Process	GO:0018200	peptidyl-glutamic acid modification	8	0	0.34	0.01165	--
Molecular Function	GO:0005262	calcium channel activity	62	3	2.48	0.01215	gene14698：JPH3，14698：up|gene14699：JPH3，14699：up|gene9947：RYR3，9947：up
Biological Process	GO:0006855	drug transmembrane transport	3	1	0.13	0.01225	gene18377：SLC47A2，18377：down
Biological Process	GO:0002230	positive regulation of defense response to virus by host	5	0	0.21	0.01226	--
Biological Process	GO:1902580	single-organism cellular localization	134	4	5.65	0.01258	gene13174：ADIPOQ，13174：down|gene16249：NDE1，16249：up|gene2823：PAK1，2823：down|gene6510：PEX7，6510：up
Biological Process	GO:1902578	single-organism localization	134	4	5.65	0.01258	gene13174：ADIPOQ，13174：down|gene16249：NDE1，16249：up|gene2823：PAK1，2823：down|gene6510：PEX7，6510：up
Biological Process	GO:0050688	regulation of defense response to virus	13	1	0.55	0.01279	gene8061：IL15，8061：down
Molecular Function	GO:0016248	channel inhibitor activity	10	0	0.4	0.01282	--
Molecular Function	GO:0008200	ion channel inhibitor activity	10	0	0.4	0.01282	--
Biological Process	GO:0060576	intestinal epithelial cell development	5	1	0.21	0.01307	gene3865：HOXA5，3865：up
Biological Process	GO:0019405	alditol catabolic process	4	1	0.17	0.01317	Gallus_gallus_newGene_20049：TPI1，20049：up
Biological Process	GO:0071921	cohesin loading	5	0	0.21	0.01325	--
Biological Process	GO:0071922	regulation of cohesin loading	5	0	0.21	0.01325	--
Biological Process	GO:0010737	protein kinase A signaling	6	1	0.25	0.01332	gene13174：ADIPOQ，13174：down
Biological Process	GO:0021884	forebrain neuron development	16	1	0.67	0.01344	gene1950：ARX，1950：down
Biological Process	GO:0019882	antigen processing and presentation	65	0	2.74	0.01352	--
Biological Process	GO:0050773	regulation of dendrite development	26	2	1.1	0.01357	gene153|gene16919：CIT，16919：down
Biological Process	GO:0048662	negative regulation of smooth muscle cell proliferation	10	3	0.42	0.01362	gene13174：ADIPOQ，13174：down|gene13305：APOD，13305：up|gene19390：MFN2，19390：up
Biological Process	GO:0009894	regulation of catabolic process	327	15	13.79	0.01373	gene1206：TIGAR，1206：up|gene12279：RGS2，12279：down|gene13225：SERPINE2，13225：down|gene13829：FBXO22，13829：up|gene14238：FURIN，14238：up|gene14852：TNNC1，14852：up|gene15528：ADRA1B，15528：down|gene17721：TBCD，17721：up|gene20951：TFEB，20951：up|gene22541：TPM2，22541：down|gene7086：UBXN2A，7086：up|gene8406：EPHA5，8406：down|gene855：TIMP3，855：down|gene9599：HRAS，9599：down|gene9602：HRAS，9602：down
Molecular Function	GO:0000978	RNA polymerase II core promoter proximal region sequence-specific DNA binding	20	0	0.8	0.01386	--
Biological Process	GO:2000045	regulation of G1/S transition of mitotic cell cycle	29	2	1.22	0.0142	gene14694：FBXO31，14694：up|gene7663：FHL1，7663：down
Biological Process	GO:0042787	protein ubiquitination involved in ubiquitin-dependent protein catabolic process	31	4	1.31	0.01446	Gallus_gallus_newGene_16404：UBR4，16404：up|gene13829：FBXO22，13829：up|gene15184：ARIH2，15184：up|gene4981：WWP1，4981：up
Biological Process	GO:0019471	4-hydroxyproline metabolic process	5	1	0.21	0.01446	gene10010：EGLN3，10010：up
Biological Process	GO:0046131	pyrimidine ribonucleoside metabolic process	26	1	1.1	0.01459	gene16416：NME3，16416：up
Biological Process	GO:0006213	pyrimidine nucleoside metabolic process	26	1	1.1	0.01459	gene16416：NME3，16416：up
Biological Process	GO:0043576	regulation of respiratory gaseous exchange	6	0	0.25	0.01502	--
Biological Process	GO:0031329	regulation of cellular catabolic process	291	13	12.27	0.01521	gene1206：TIGAR，1206：up|gene12279：RGS2，12279：down|gene13829：FBXO22，13829：up|gene14238：FURIN，14238：up|gene14852：TNNC1，14852：up|gene15528：ADRA1B，15528：down|gene17721：TBCD，17721：up|gene20951：TFEB，20951：up|gene22541：TPM2，22541：down|gene8406：EPHA5，8406：down|gene855：TIMP3，855：down|gene9599：HRAS，9599：down|gene9602：HRAS，9602：down
Biological Process	GO:0031581	hemidesmosome assembly	3	0	0.13	0.01531	--
Molecular Function	GO:0016774	phosphotransferase activity, carboxyl group as acceptor	3	1	0.12	0.01541	gene7816：PGK，7816：up
Cellular Component	GO:0016459	myosin complex	44	6	1.73	0.01561	Gallus_gallus_newGene_15489：CIB84_010615，15489：up|gene17665：MYH1F，17665：down|gene17669：MYH1B，17669：up|gene17671：MYH1E，17671：up|gene17673：MYH1C，17673：down|gene20708：MYBPH，20708：up
Biological Process	GO:0048168	regulation of neuronal synaptic plasticity	18	6	0.76	0.01576	gene14698：JPH3，14698：up|gene14699：JPH3，14699：up|gene15705：CAMK2A，15705：down|gene19414：EPHB2，19414：down|gene9599：HRAS，9599：down|gene9602：HRAS，9602：down
Biological Process	GO:0010507	negative regulation of autophagy	11	1	0.46	0.0158	gene1206：TIGAR，1206：up
Biological Process	GO:0009084	glutamine family amino acid biosynthetic process	15	0	0.63	0.01587	--
Biological Process	GO:0006924	activation-induced cell death of T cells	5	1	0.21	0.01594	gene11190：GPAM，11190：down
Cellular Component	GO:0005847	mRNA cleavage and polyadenylation specificity factor complex	5	0	0.2	0.01613	--
Biological Process	GO:0061081	positive regulation of myeloid leukocyte cytokine production involved in immune response	9	2	0.38	0.0163	gene186|gene3070：CD36，3070：down
Biological Process	GO:0000960	regulation of mitochondrial RNA catabolic process	3	0	0.13	0.01652	--
Biological Process	GO:0000963	mitochondrial RNA processing	3	1	0.13	0.01652	gene6871：MTO1，6871：up
Biological Process	GO:0000957	mitochondrial RNA catabolic process	3	0	0.13	0.01652	--
Biological Process	GO:0006560	proline metabolic process	8	0	0.34	0.01693	--
Biological Process	GO:0046174	polyol catabolic process	13	4	0.55	0.01705	Gallus_gallus_newGene_20049：TPI1，20049：up|gene20921：NUDT3，20921：up|gene4634：IMPA2，4634：up|gene8588：MTMR7，8588：up
Biological Process	GO:0046322	negative regulation of fatty acid oxidation	3	0	0.13	0.01714	--
Biological Process	GO:0006112	energy reserve metabolic process	40	9	1.69	0.01744	Gallus_gallus_newGene_21069：PHKB，21069：up|Gallus_gallus_newGene_23546：GYS1，23546：up|Gallus_gallus_newGene_25030：PYGM，25030：up|gene11915：PRKAG3，11915：up|gene14526：PHKB，14526：up|gene15528：ADRA1B，15528：down|gene25911：GYS1，25911：up|gene26487：GYS1，26487：up|gene6074：PLB1，6074：down
Biological Process	GO:0051085	chaperone mediated protein folding requiring cofactor	12	0	0.51	0.01755	--
Molecular Function	GO:0004118	cGMP-stimulated cyclic-nucleotide phosphodiesterase activity	3	0	0.12	0.01771	--
Biological Process	GO:0009218	pyrimidine ribonucleotide metabolic process	22	1	0.93	0.01781	gene16416：NME3，16416：up
Molecular Function	GO:0035198	miRNA binding	8	0	0.32	0.01788	--
Cellular Component	GO:0005967	mitochondrial pyruvate dehydrogenase complex	3	2	0.12	0.01807	gene21200：PDK2，21200：down|gene24885：PDK2，24885：down
Molecular Function	GO:0003774	motor activity	82	5	3.28	0.01809	Gallus_gallus_newGene_15489：CIB84_010615，15489：up|gene17665：MYH1F，17665：down|gene17669：MYH1B，17669：up|gene17671：MYH1E，17671：up|gene17673：MYH1C，17673：down
Molecular Function	GO:0000987	core promoter proximal region sequence-specific DNA binding	28	0	1.12	0.01824	--
Biological Process	GO:1903289	obsolete regulation of ATP catabolic process	17	2	0.72	0.01829	gene14852：TNNC1，14852：up|gene22541：TPM2，22541：down
Biological Process	GO:0043462	regulation of ATPase activity	17	2	0.72	0.01829	gene14852：TNNC1，14852：up|gene22541：TPM2，22541：down
Biological Process	GO:1901606	alpha-amino acid catabolic process	36	1	1.52	0.01845	gene6684：DDO，6684：up
Biological Process	GO:0006900	vesicle budding from membrane	20	2	0.84	0.01878	gene3532：INSIG1，3532：up|gene9515：TSG101，9515：up：TSG101，9515：up
Molecular Function	GO:0016247	channel regulator activity	28	1	1.12	0.0189	Gallus_gallus_newGene_24651：LOC102114762，24651：up
Cellular Component	GO:0044463	cell projection part	147	9	5.77	0.01891	gene14627：CDH8，14627：up|gene17386：AK1，17386：up|gene21407：CNTNAP1，21407：down|gene2823：PAK1，2823：down|gene2920：GDPD5，2920：down|gene3533：EN2，3533：down|gene4218：NRSN1，4218：up|gene5570：EN2，5570：down|gene7634：FRMD7，7634：up
Molecular Function	GO:0004619	phosphoglycerate mutase activity	2	2	0.08	0.01896	gene1029：BPGM，1029：up|gene11094：PGAM1，11094：up
Cellular Component	GO:0000803	sex chromosome	12	0	0.47	0.01902	--
Biological Process	GO:0033209	tumor necrosis factor-mediated signaling pathway	14	1	0.59	0.01918	gene13174：ADIPOQ，13174：down
Molecular Function	GO:0032266	phosphatidylinositol-3-phosphate binding	19	0	0.76	0.01925	--
Cellular Component	GO:0005657	replication fork	19	0	0.75	0.01926	--
Biological Process	GO:0022037	metencephalon development	45	2	1.9	0.01934	gene13225：SERPINE2，13225：down|gene373
Molecular Function	GO:0008518	reduced folate carrier activity	4	0	0.16	0.01936	--
Molecular Function	GO:0005088	Ras guanyl-nucleotide exchange factor activity	50	1	2	0.01956	gene13065：ARHGEF4，13065：up
Molecular Function	GO:0070892	lipoteichoic acid receptor activity	2	2	0.08	0.0196	gene186|gene3070：CD36，3070：down
Molecular Function	GO:0005041	low-density lipoprotein receptor activity	2	2	0.08	0.0196	gene186|gene3070：CD36，3070：down
Biological Process	GO:2000249	regulation of actin cytoskeleton reorganization	9	2	0.38	0.01963	gene9599：HRAS，9599：down|gene9602：HRAS，9602：down
Biological Process	GO:0071402	cellular response to lipoprotein particle stimulus	2	2	0.08	0.0197	gene186|gene3070：CD36，3070：down
Biological Process	GO:0071404	cellular response to low-density lipoprotein particle stimulus	2	2	0.08	0.0197	gene186|gene3070：CD36，3070：down
Biological Process	GO:2000332	regulation of blood microparticle formation	2	2	0.08	0.0197	gene186|gene3070：CD36，3070：down
Biological Process	GO:2000334	positive regulation of blood microparticle formation	2	2	0.08	0.0197	gene186|gene3070：CD36，3070：down
Biological Process	GO:0055095	lipoprotein particle mediated signaling	2	2	0.08	0.0197	gene186|gene3070：CD36，3070：down
Biological Process	GO:0055096	low-density lipoprotein particle mediated signaling	2	2	0.08	0.0197	gene186|gene3070：CD36，3070：down
Biological Process	GO:0072564	blood microparticle formation	2	2	0.08	0.0197	gene186|gene3070：CD36，3070：down
Biological Process	GO:0008045	motor neuron axon guidance	13	1	0.55	0.01971	gene10986：CXCL12，10986：down
Molecular Function	GO:0005212	structural constituent of eye lens	19	3	0.76	0.01992	gene1084：LDHB，1084：down|gene3182：LDHB，3182：down|gene5776：BFSP1，5776：up
Biological Process	GO:0071542	dopaminergic neuron differentiation	9	1	0.38	0.01993	gene10929：PITX3，10929：down
Biological Process	GO:0051598	meiotic recombination checkpoint	4	0	0.17	0.02	--
Biological Process	GO:0060629	regulation of homologous chromosome segregation	4	0	0.17	0.02	--
Biological Process	GO:0070193	synaptonemal complex organization	8	0	0.34	0.02009	--
Cellular Component	GO:0031430	M band	6	1	0.24	0.02013	gene1974：SMPX，1974：down
Biological Process	GO:0033539	fatty acid beta-oxidation using acyl-CoA dehydrogenase	5	0	0.21	0.02056	--
Biological Process	GO:0002011	morphogenesis of an epithelial sheet	20	1	0.84	0.02057	gene4085：TBX20，4085：down
Molecular Function	GO:0005245	voltage-gated calcium channel activity	22	0	0.88	0.02062	--
Biological Process	GO:0060577	pulmonary vein morphogenesis	2	2	0.08	0.02082	gene4085：TBX20，4085：down|gene8492：PITX2，8492：down
Biological Process	GO:0033500	carbohydrate homeostasis	58	6	2.45	0.02084	gene13174：ADIPOQ，13174：down|gene15528：ADRA1B，15528：down|gene21200：PDK2，21200：down|gene23869：PFKM，23869：up|gene24885：PDK2，24885：down|gene3742：PDK4，3742：down
Biological Process	GO:0042593	glucose homeostasis	58	6	2.45	0.02084	gene13174：ADIPOQ，13174：down|gene15528：ADRA1B，15528：down|gene21200：PDK2，21200：down|gene23869：PFKM，23869：up|gene24885：PDK2，24885：down|gene3742：PDK4，3742：down
Cellular Component	GO:0016529	sarcoplasmic reticulum	27	0	1.06	0.02102	--
Molecular Function	GO:0030955	potassium ion binding	4	1	0.16	0.02109	gene1374：TBX15，1374：down|gene13746：PKM，13746：up
Biological Process	GO:0044282	small molecule catabolic process	113	9	4.77	0.02117	Gallus_gallus_newGene_20049：TPI1，20049：up|gene1067：BCAT1，1067：up|gene13174：ADIPOQ，13174：down|gene20921：NUDT3，20921：up|gene4634：IMPA2，4634：up|gene4993：DECR1，4993：down|gene6510：PEX7，6510：up|gene6684：DDO，6684：up|gene8588：MTMR7，8588：up
Biological Process	GO:0030277	maintenance of gastrointestinal epithelium	6	0	0.25	0.02121	--
Biological Process	GO:0034612	response to tumor necrosis factor	39	1	1.64	0.02131	gene13174：ADIPOQ，13174：down
Cellular Component	GO:0036477	somatodendritic compartment	124	8	4.86	0.02132	gene1281：KPNA1，1281：up|gene19414：EPHB2，19414：down|gene25858：ENO3，25858：up|gene3890：BTD，3890：down|gene4218：NRSN1，4218：up|gene7634：FRMD7，7634：up|gene8406：EPHA5，8406：down|gene8806：DPYSL2，8806：down
Biological Process	GO:0050764	regulation of phagocytosis	16	4	0.67	0.02133	gene13174：ADIPOQ，13174：down|gene153|gene186|gene3070：CD36，3070：down
Biological Process	GO:0090303	positive regulation of wound healing	7	2	0.3	0.0215	gene9599：HRAS，9599：down|gene9602：HRAS，9602：down
Cellular Component	GO:0016442	RISC complex	8	0	0.31	0.02151	--
Cellular Component	GO:0031332	RNAi effector complex	8	0	0.31	0.02151	--
Molecular Function	GO:0051015	actin filament binding	32	1	1.28	0.02165	gene14852：TNNC1，14852：up
Biological Process	GO:0006090	pyruvate metabolic process	47	17	1.98	0.02168	Gallus_gallus_newGene_20049：TPI1，20049：up|Gallus_gallus_newGene_25321：LOC104917114，25321：up|gene1029：BPGM，1029：up|gene1084：LDHB，1084：down|gene11094：PGAM1，11094：up|gene1312：TPI1，1312：up|gene1374：TBX15，1374：down|gene13746：PKM，13746：up|gene14592：GPI，14592：up|gene21200：PDK2，21200：down|gene23869：PFKM，23869：up|gene24885：PDK2，24885：down|gene25417：ALDOA，25417：up|gene25858：ENO3，25858：up|gene3182：LDHB，3182…
Biological Process	GO:0019682	glyceraldehyde-3-phosphate metabolic process	4	2	0.17	0.02176	Gallus_gallus_newGene_20049：TPI1，20049：up|gene1312：TPI1，1312：up
Biological Process	GO:0007632	visual behavior	21	3	0.89	0.0219	gene15528：ADRA1B，15528：down|gene9599：HRAS，9599：down|gene9602：HRAS，9602：down
Biological Process	GO:0006848	pyruvate transport	4	1	0.17	0.02198	gene6345：-，6345：up
Biological Process	GO:0006850	mitochondrial pyruvate transport	4	1	0.17	0.02198	gene6345：-，6345：up
Molecular Function	GO:0005509	calcium ion binding	456	15	18.25	0.02214	gene10245：DLK1，10245：down|gene14464：NECAB2，14464：down|gene14507：NKD1，14507：down|gene14627：CDH8，14627：up|gene14852：TNNC1，14852：up|gene15491：SLIT3，15491：down|gene18315：PROCA1，18315：up|gene18426：USP32，18426：up|gene23254：VCAN，23254：down|gene4066：EPDR1，4066：up|gene4997：NECAB1，4997：down|gene5631：FBLN7，5631：down|gene7696：PCDH11X，7696：down|gene830：PVALB，830：down|gene9947：RYR3，9947：up
Cellular Component	GO:0031224	intrinsic component of membrane	2196	79	86.14	0.02216	Gallus_gallus_newGene_24651：LOC102114762，24651：up|Gallus_gallus_newGene_24723：LOC106899679，24723：up|Gallus_gallus_newGene_6113：ND5，6113：up|gene1001|gene10059：SYNDIG1L，10059：down|gene10757：SLC16A9，10757：up|gene11095：RRP12，11095：up|gene11167：SORCS3，11167：down|gene11500：ERBB4，11500：up|gene11523：RAMP1，11523：down|gene11768：GPR155，11768：up|gene11853：KCNH7，11853：down|gene12519：TLCD4，12519：up|gene12522：S…
Biological Process	GO:0006531	aspartate metabolic process	4	1	0.17	0.02224	gene6684：DDO，6684：up
Molecular Function	GO:0048551	enzyme inhibitor activity	4	2	0.16	0.02225	gene17961：TIMP2，17961：down|gene855：TIMP3，855：down
Molecular Function	GO:0008191	metalloendopeptidase inhibitor activity	4	2	0.16	0.02225	gene17961：TIMP2，17961：down|gene855：TIMP3，855：down
Biological Process	GO:1900029	positive regulation of ruffle assembly	2	2	0.08	0.02247	gene9599：HRAS，9599：down|gene9602：HRAS，9602：down
Biological Process	GO:0050691	regulation of defense response to virus by host	7	1	0.3	0.02251	gene8061：IL15，8061：down
Biological Process	GO:0021549	cerebellum development	40	2	1.69	0.02258	gene13225：SERPINE2，13225：down|gene373
Biological Process	GO:0007566	embryo implantation	7	1	0.3	0.02267	gene17515：RXRA，17515：up
Biological Process	GO:0031330	negative regulation of cellular catabolic process	29	4	1.22	0.02271	gene1206：TIGAR，1206：up|gene14238：FURIN，14238：up|gene15528：ADRA1B，15528：down|gene855：TIMP3，855：down
Biological Process	GO:0006573	valine metabolic process	3	1	0.13	0.02273	gene3877：HIBADH，3877：up
Biological Process	GO:0071356	cellular response to tumor necrosis factor	31	1	1.31	0.02285	gene13174：ADIPOQ，13174：down
Cellular Component	GO:0031672	A band	12	1	0.47	0.02295	gene1974：SMPX，1974：down
Biological Process	GO:0045715	negative regulation of low-density lipoprotein particle receptor biosynthetic process	3	1	0.13	0.02303	gene13174：ADIPOQ，13174：down
Biological Process	GO:0030032	lamellipodium assembly	22	2	0.93	0.02308	gene13065：ARHGEF4，13065：up|gene13603：CLRN1，13603：up
Biological Process	GO:0031468	nuclear envelope reassembly	5	0	0.21	0.02328	--
Biological Process	GO:0007130	synaptonemal complex assembly	6	0	0.25	0.02336	--
Biological Process	GO:0060631	regulation of meiosis I	7	0	0.3	0.02345	--
Biological Process	GO:0007603	phototransduction, visible light	4	0	0.17	0.02352	--
Biological Process	GO:0051648	vesicle localization	63	2	2.66	0.02357	gene16249：NDE1，16249：up|gene4120：AMPH，4120：up
Biological Process	GO:0018105	peptidyl-serine phosphorylation	95	2	4.01	0.02362	Gallus_gallus_newGene_47：LOC110391435，47：up|gene2823：PAK1，2823：down
Biological Process	GO:0018209	peptidyl-serine modification	105	2	4.43	0.02363	Gallus_gallus_newGene_47：LOC110391435，47：up|gene2823：PAK1，2823：down
Molecular Function	GO:0030506	ankyrin binding	9	0	0.36	0.02366	--
Biological Process	GO:0070170	regulation of tooth mineralization	4	0	0.17	0.02376	--
Molecular Function	GO:0001102	RNA polymerase II activating transcription factor binding	28	2	1.12	0.02381	gene4085：TBX20，4085：down|gene8492：PITX2，8492：down
Biological Process	GO:0060998	regulation of dendritic spine development	9	0	0.38	0.02387	--
Biological Process	GO:0010871	negative regulation of receptor biosynthetic process	4	1	0.17	0.02394	gene13174：ADIPOQ，13174：down
Molecular Function	GO:0001227	transcriptional repressor activity, RNA polymerase II transcription regulatory region sequence-specific binding	27	1	1.08	0.02397	gene8492：PITX2，8492：down
Molecular Function	GO:0043169	cation binding	2118	91	84.76	0.02401	Gallus_gallus_newGene_16404：UBR4，16404：up|Gallus_gallus_newGene_23591：COL3A1，23591：down|Gallus_gallus_newGene_6113：ND5，6113：up|gene10010：EGLN3，10010：up|gene10245：DLK1，10245：down|gene10337：ZBTB25，10337：up|gene10692：MAT1A，10692：up|gene10879 ：ZNF503，10879：down|gene11472：COL3A1，11472：down|gene11645：AOX1，11645：up|gene11724：ZNF385B，11724：down|gene11805：UBR3，11805：up|gene12303：CRIP1，12303：down|gene12425…
Biological Process	GO:0010510	regulation of acetyl-CoA biosynthetic process from pyruvate	5	3	0.21	0.02417	gene21200：PDK2，21200：down|gene24885：PDK2，24885：down|gene3742：PDK4，3742：down
Biological Process	GO:0031935	regulation of chromatin silencing	4	0	0.17	0.02422	--
Biological Process	GO:0090502	RNA phosphodiester bond hydrolysis, endonucleolytic	6	0	0.25	0.02425	--
Molecular Function	GO:0015278	calcium-release channel activity	23	3	0.92	0.02427	gene14698：JPH3，14698：up|gene14699：JPH3，14699：up|gene9947：RYR3，9947：up
Biological Process	GO:0021532	neural tube patterning	21	2	0.89	0.02428	gene13290：ZIC1，13290：down|gene17809：NOTUM，17809：up
Molecular Function	GO:0019899	enzyme binding	528	22	21.13	0.02435	Gallus_gallus_newGene_20049：TPI1，20049：up|Gallus_gallus_newGene_47：LOC110391435，47：up|gene10074：NEK9，10074：up|gene10332：PPP1R36，10332：down|gene11915：PRKAG3，11915：up|gene14238：FURIN，14238：up|gene15800：ACSL6，15800：up|gene16746：MAPKAPK5，16746：up|gene17515：RXRA，17515：up|gene19194：TP73，19194：up|gene19390：MFN2，19390：up|gene19557：ZNF703，19557：down|gene20915：UHRF1BP1，20915：up|gene20962：CCND3，20962：up|gen…
Cellular Component	GO:0045254	pyruvate dehydrogenase complex	4	2	0.16	0.02437	gene21200：PDK2，21200：down|gene24885：PDK2，24885：down
Biological Process	GO:0036010	protein localization to endosome	4	0	0.17	0.02443	--
Molecular Function	GO:0005516	calmodulin binding	39	8	1.56	0.02446	Gallus_gallus_newGene_15489：CIB84_010615，15489：up|Gallus_gallus_newGene_21069：PHKB，21069：up|gene14526：PHKB，14526：up|gene15705：CAMK2A，15705：down|gene17671：MYH1E，17671：up|gene17673：MYH1C，17673：down|gene20048：NRGN，20048：up|gene21920：CNN1，21920：down
Molecular Function	GO:0070915	lysophosphatidic acid receptor activity	3	2	0.12	0.02449	gene23329：LPAR1,23329：down|gene23865：LPAR2，23865：down
Molecular Function	GO:0003727	single-stranded RNA binding	24	4	0.96	0.02453	gene16908：MSI1，16908：up|gene17589：STRBP，17589：up|gene17754：JMJD6，17754：up|gene7037：DDX1，7037：up
Biological Process	GO:0006085	acetyl-CoA biosynthetic process	9	3	0.38	0.02456	gene21200：PDK2，21200：down|gene24885：PDK2，24885：down|gene3742：PDK4，3742：down
Biological Process	GO:1901607	alpha-amino acid biosynthetic process	45	2	1.9	0.02457	gene22325：CARNS1，22325：up|gene22733：BHMT，22733：up
Biological Process	GO:0046132	pyrimidine ribonucleoside biosynthetic process	21	1	0.89	0.0252	gene16416：NME3，16416：up
Biological Process	GO:0046134	pyrimidine nucleoside biosynthetic process	21	1	0.89	0.0252	gene16416：NME3，16416：up
Biological Process	GO:0009220	pyrimidine ribonucleotide biosynthetic process	21	1	0.89	0.0252	gene16416：NME3，16416：up
Biological Process	GO:0007043	cell-cell junction assembly	22	2	0.93	0.02523	gene20872：RHOC，20872：down|gene21407：CNTNAP1，21407：down
Biological Process	GO:0045930	negative regulation of mitotic cell cycle	15	1	0.63	0.02523	gene7663：FHL1，7663：down
Biological Process	GO:0043954	cellular component maintenance	7	0	0.3	0.02527	--
Molecular Function	GO:0090484	drug transporter activity	6	1	0.24	0.02538	gene18377：SLC47A2，18377：down
Molecular Function	GO:0015238	drug transmembrane transporter activity	6	1	0.24	0.02538	gene18377：SLC47A2，18377：down
Biological Process	GO:0015985	energy coupled proton transport, down electrochemical gradient	14	0	0.59	0.02559	--
Biological Process	GO:0015986	ATP synthesis coupled proton transport	14	0	0.59	0.02559	--
Molecular Function	GO:0005501	retinoid binding	8	1	0.32	0.02621	gene14094：NR2F2，14094：down
Molecular Function	GO:0019840	isoprenoid binding	8	1	0.32	0.02621	gene14094：NR2F2，14094：down
Biological Process	GO:0007350	blastoderm segmentation	8	0	0.34	0.02629	--
Biological Process	GO:0050919	negative chemotaxis	11	2	0.46	0.02638	gene14973：SEMA3F，14973：down|gene15491：SLIT3，15491：down
Biological Process	GO:0051156	glucose 6-phosphate metabolic process	8	0	0.34	0.02653	--
Molecular Function	GO:0004800	thyroxine 5'-deiodinase activity	3	0	0.12	0.02658	--
Molecular Function	GO:0004596	peptide alpha-N-acetyltransferase activity	5	0	0.2	0.0266	--
Molecular Function	GO:0034212	peptide N-acetyltransferase activity	5	0	0.2	0.0266	--
Biological Process	GO:0051607	defense response to virus	49	2	2.07	0.02664	gene11190：GPAM，11190：down|gene8061：IL15，8061：down
Biological Process	GO:0070989	oxidative demethylation	5	1	0.21	0.02692	gene16135：ALKBH5，gene16135：up
Biological Process	GO:0018126	protein hydroxylation	7	2	0.3	0.02696	gene10010：EGLN3，10010：up|gene17754：JMJD6，17754：up
Biological Process	GO:0060762	regulation of branching involved in mammary gland duct morphogenesis	4	0	0.17	0.02702	--
Molecular Function	GO:0046872	metal ion binding	2080	91	83.24	0.02704	Gallus_gallus_newGene_16404：UBR4，16404：up|Gallus_gallus_newGene_23591：COL3A1，23591：down|Gallus_gallus_newGene_6113：ND5，6113：up|gene10010：EGLN3，10010：up|gene10245：DLK1，10245：down|gene10337：ZBTB25，10337：up|gene10692：MAT1A，10692：up|gene10879 ：ZNF503，10879：down|gene11472：COL3A1，11472：down|gene11645：AOX1，11645：up|gene11724：ZNF385B，11724：down|gene11805：UBR3，11805：up|gene12303：CRIP1，12303：down|gene12425…
Cellular Component	GO:0071014	post-mRNA release spliceosomal complex	2	0	0.08	0.02739	--
Cellular Component	GO:0071008	U2-type post-mRNA release spliceosomal complex	2	0	0.08	0.02739	--
Biological Process	GO:0002028	regulation of sodium ion transport	26	2	1.1	0.02743	gene13225：SERPINE2，13225：down|gene373
Biological Process	GO:0070918	production of small RNA involved in gene silencing by RNA	11	0	0.46	0.02753	--
Biological Process	GO:0035196	production of miRNAs involved in gene silencing by miRNA	11	0	0.46	0.02753	--
Biological Process	GO:0031050	dsRNA fragmentation	11	0	0.46	0.02753	--
Biological Process	GO:0045717	negative regulation of fatty acid biosynthetic process	5	1	0.21	0.0277	gene3532：INSIG1，3532：up
Cellular Component	GO:0032982	myosin filament	8	4	0.31	0.02772	Gallus_gallus_newGene_15489：CIB84_010615，15489：up|gene17671：MYH1E，17671：up|gene17673：MYH1C，17673：down|gene20708：MYBPH，20708：up
Biological Process	GO:0072676	lymphocyte migration	14	1	0.59	0.02806	gene13305：APOD，13305：up
Biological Process	GO:0060968	regulation of gene silencing	9	0	0.38	0.02813	--
Molecular Function	GO:0004846	urate oxidase activity	3	0	0.12	0.02814	--
Molecular Function	GO:0016661	oxidoreductase activity, acting on other nitrogenous compounds as donors	3	0	0.12	0.02814	--
Molecular Function	GO:0016663	oxidoreductase activity, acting on other nitrogenous compounds as donors, oxygen as acceptor	3	0	0.12	0.02814	--
Biological Process	GO:0032319	regulation of GTPase activity	46	3	1.94	0.02815	gene8406：EPHA5，8406：down|gene9599：HRAS，9599：down|gene9602：HRAS，9602：down
Biological Process	GO:0050885	neuromuscular process controlling balance	28	4	1.18	0.02838	gene13603：CLRN1，13603：up|gene14698：JPH3，14698：up|gene14699：JPH3，14699：up|gene21407：CNTNAP1，21407：down
Biological Process	GO:0050766	positive regulation of phagocytosis	10	3	0.42	0.02855	gene153|gene186|gene3070：CD36，3070：down
Molecular Function	GO:0051213	dioxygenase activity	38	3	1.52	0.02887	gene10010：EGLN3，10010：up|gene16135：ALKBH5，gene16135：up|gene17754：JMJD6，17754：up
Molecular Function	GO:0004478	methionine adenosyltransferase activity	4	1	0.16	0.02889	gene10692：MAT1A，10692：up
Biological Process	GO:0044065	regulation of respiratory system process	4	0	0.17	0.02893	--
Cellular Component	GO:0097539	ciliary transition fiber	2	0	0.08	0.02895	--
Biological Process	GO:0006198	cAMP catabolic process	4	0	0.17	0.02897	--
Biological Process	GO:0097011	cellular response to granulocyte macrophage colony-stimulating factor stimulus	4	0	0.17	0.02897	--
Biological Process	GO:0097012	response to granulocyte macrophage colony-stimulating factor	4	0	0.17	0.02897	--
Biological Process	GO:0010648	negative regulation of cell communication	375	23	15.81	0.02918	gene10245：DLK1，10245：down|gene1084：LDHB，1084：down0|gene11277：HTRA1，11277：down|gene1206：TIGAR，1206：up|gene12279：RGS2，12279：down|gene13174：ADIPOQ，13174：down|gene13225：SERPINE2，13225：down|gene13305：APOD，13305：up|gene15491：SLIT3，15491：down|gene15682：G3BP1，15682：up|gene16746：MAPKAPK5，16746：up|gene17809：NOTUM，17809：up|gene17966：SOCS3，17966：down|gene19194：TP73，19194：up|gene19344：NBL1，19344：down|gene1939…
Biological Process	GO:0034315	regulation of Arp2/3 complex-mediated actin nucleation	5	0	0.21	0.02932	--
Biological Process	GO:0070142	synaptic vesicle budding	2	0	0.08	0.02934	--
Biological Process	GO:1902774	late endosome to lysosome transport	2	0	0.08	0.02934	--
Biological Process	GO:1902822	regulation of late endosome to lysosome transport	2	0	0.08	0.02934	--
Biological Process	GO:1902824	positive regulation of late endosome to lysosome transport	2	0	0.08	0.02934	--
Biological Process	GO:1902953	positive regulation of ER to Golgi vesicle-mediated transport	2	0	0.08	0.02934	--
Biological Process	GO:1903337	positive regulation of vacuolar transport	2	0	0.08	0.02934	--
Biological Process	GO:0055108	Golgi to transport vesicle transport	2	0	0.08	0.02934	--
Biological Process	GO:0050690	regulation of defense response to virus by virus	2	0	0.08	0.02934	--
Biological Process	GO:0071616	acyl-CoA biosynthetic process	13	3	0.55	0.02937	gene21200：PDK2，21200：down|gene24885：PDK2，24885：down|gene3742：PDK4，3742：down
Biological Process	GO:0035384	thioester biosynthetic process	13	3	0.55	0.02937	gene21200：PDK2，21200：down|gene24885：PDK2，24885：down|gene3742：PDK4，3742：down
Cellular Component	GO:0010494	cytoplasmic stress granule	14	3	0.55	0.02939	gene13590：MBNL1，13590：up|gene15682：G3BP1，15682：up|gene7037：DDX1，7037：up
Molecular Function	GO:0004518	nuclease activity	95	1	3.8	0.02967	gene7037：DDX1，7037：up
Biological Process	GO:0050768	negative regulation of neurogenesis	52	3	2.19	0.02987	gene14973：SEMA3F，14973：down|gene16919：CIT，16919：down|gene19414：EPHB2，19414：down
Biological Process	GO:0048749	compound eye development	2	1	0.08	0.02996	gene7827：CHRDL1，7827：down
Biological Process	GO:0008306	associative learning	26	3	1.1	0.03002	gene15528：ADRA1B，15528：down|gene9599：HRAS，9599：down|gene9602：HRAS，9602：down
Molecular Function	GO:0016820	hydrolase activity, acting on acid anhydrides, catalyzing transmembrane movement of substances	84	1	3.36	0.0301	gene5351：ABCB8，5351：down
Biological Process	GO:0019628	urate catabolic process	3	0	0.13	0.03011	--
Biological Process	GO:2001259	positive regulation of cation channel activity	11	0	0.46	0.03012	--
Biological Process	GO:0044320	cellular response to leptin stimulus	6	0	0.25	0.03019	--
Biological Process	GO:0044321	response to leptin	6	0	0.25	0.03019	--
Molecular Function	GO:0030507	spectrin binding	4	1	0.16	0.03063	gene208
Molecular Function	GO:0016301	kinase activity	620	30	24.81	0.03078	Gallus_gallus_newGene_18494：LOC109365375，18494：up|Gallus_gallus_newGene_21022：ALPK3，21022：up|Gallus_gallus_newGene_21069：PHKB，21069：up|Gallus_gallus_newGene_47：LOC110391435，47：up|gene10074：NEK9，10074：up|gene11500：ERBB4，11500：up|gene13715：ALPK3，13715：up|gene1374：TBX15，1374：down|gene13746：PKM，13746：up|gene153|gene15705：CAMK2A，15705：down|gene16416：NME3，16416：up|gene16746：MAPKAPK5，16746：up|gene16919：…
Biological Process	GO:0006556	S-adenosylmethionine biosynthetic process	4	1	0.17	0.03088	gene10692：MAT1A，10692：up
Biological Process	GO:0008542	visual learning	20	3	0.84	0.03117	gene15528：ADRA1B，15528：down|gene9599：HRAS，9599：down|gene9602：HRAS，9602：down
Biological Process	GO:0090503	RNA phosphodiester bond hydrolysis, exonucleolytic	2	0	0.08	0.03129	--
Molecular Function	GO:0001159	core promoter proximal region DNA binding	29	0	1.16	0.03167	--
Biological Process	GO:0097352	autophagosome maturation	2	0	0.08	0.03181	--
Molecular Function	GO:0015288	porin activity	4	0	0.16	0.03183	--
Biological Process	GO:1901021	positive regulation of calcium ion transmembrane transporter activity	10	0	0.42	0.03199	--
Molecular Function	GO:0004623	phospholipase A2 activity	16	1	0.64	0.03223	gene18315：PROCA1，18315：up
Biological Process	GO:0072659	protein localization to plasma membrane	54	1	2.28	0.03241	gene13174：ADIPOQ，13174：down
Molecular Function	GO:0005048	signal sequence binding	11	1	0.44	0.03273	gene6510：PEX7，6510：up
Biological Process	GO:0000083	regulation of transcription involved in G1/S transition of mitotic cell cycle	6	0	0.25	0.0329	--
Biological Process	GO:1990126	retrograde transport, endosome to plasma membrane	2	0	0.08	0.03312	--
Biological Process	GO:0044264	cellular polysaccharide metabolic process	47	9	1.98	0.03313	Gallus_gallus_newGene_21069：PHKB，21069：up|Gallus_gallus_newGene_23546：GYS1，23546：up|Gallus_gallus_newGene_25030：PYGM，25030：up|gene11915：PRKAG3，11915：up|gene14526：PHKB，14526：up|gene15528：ADRA1B，15528：down|gene25911：GYS1，25911：up|gene26487：GYS1，26487：up|gene6074：PLB1，6074：down
Biological Process	GO:0090271	positive regulation of fibroblast growth factor production	2	0	0.08	0.03324	--
Biological Process	GO:0019563	glycerol catabolic process	3	1	0.13	0.03347	Gallus_gallus_newGene_20049：TPI1，20049：up
Molecular Function	GO:0031418	L-ascorbic acid binding	10	1	0.4	0.03351	gene10010：EGLN3，10010：up
Biological Process	GO:0042572	retinol metabolic process	6	1	0.25	0.03377	gene22950：ALDH1A1，22950：up
Biological Process	GO:0035304	regulation of protein dephosphorylation	6	0	0.25	0.03404	--
Biological Process	GO:0006839	mitochondrial transport	47	3	1.98	0.03423	gene19390：MFN2，19390：up|gene2469：SLC25A30，2469：up|gene6345：-，6345：up
Molecular Function	GO:0019205	nucleobase-containing compound kinase activity	31	2	1.24	0.03423	gene16416：NME3，16416：up|gene17386：AK1，17386：up
Biological Process	GO:0032729	positive regulation of interferon-gamma production	15	1	0.63	0.03433	gene20242：IL18，20242：down
Biological Process	GO:0032411	positive regulation of transporter activity	20	0	0.84	0.0346	--
Biological Process	GO:0002228	natural killer cell mediated immunity	11	0	0.46	0.03477	--
Biological Process	GO:0042267	natural killer cell mediated cytotoxicity	11	0	0.46	0.03477	--
Biological Process	GO:0070305	response to cGMP	2	0	0.08	0.03505	--
Biological Process	GO:0071321	cellular response to cGMP	2	0	0.08	0.03505	--
Biological Process	GO:0033159	negative regulation of protein import into nucleus, translocation	2	0	0.08	0.03505	--
Cellular Component	GO:0000307	cyclin-dependent protein kinase holoenzyme complex	8	1	0.31	0.03513	gene20962：CCND3，20962：up
Molecular Function	GO:0005143	interleukin-12 receptor binding	3	0	0.12	0.03525	--
Molecular Function	GO:0005003	ephrin receptor activity	13	2	0.52	0.03527	gene19414：EPHB2，19414：down|gene8406：EPHA5，8406：down
Biological Process	GO:0061082	myeloid leukocyte cytokine production	13	2	0.55	0.03531	gene186|gene3070：CD36，3070：down
Molecular Function	GO:1990190	peptide-glutamate-N-acetyltransferase activity	2	0	0.08	0.0354	--
Molecular Function	GO:1990189	peptide-serine-N-acetyltransferase activity	2	0	0.08	0.0354	--
Molecular Function	GO:0047750	cholestenol delta-isomerase activity	2	0	0.08	0.03551	--
Biological Process	GO:0034330	cell junction organization	70	5	2.95	0.03555	gene13305：APOD，13305：up|gene19557：ZNF703，19557：down|gene20872：RHOC，20872：down|gene21172：ITGB3，21172：down|gene21407：CNTNAP1，21407：down
Biological Process	GO:0090002	protein localization to plasma membrane	36	0	1.52	0.03572	--
Cellular Component	GO:0005927	muscle tendon junction	4	1	0.16	0.03582	gene1974：SMPX，1974：down
Biological Process	GO:0045956	positive regulation of calcium ion-dependent exocytosis	13	0	0.55	0.0359	--
Molecular Function	GO:0001078	transcriptional repressor activity, RNA polymerase II core promoter proximal region sequence-specific binding	26	1	1.04	0.03599	gene8492：PITX2，8492：down
Molecular Function	GO:0016787	hydrolase activity	1602	73	64.11	0.03603	Gallus_gallus_newGene_15489：CIB84_010615，15489：up|gene1037：RERG，1037：down|gene10995：ACTA2，10995：down|gene11074：HPSE2，11074：up|gene11094：PGAM1，11094：up|gene11277：HTRA1，11277：down|ggene11856：FAP，11856：down|gene13478：NCEH1，13478：up|gene1396：POLQ，1396：up|gene14069：AGBL1，14069：down|gene14238：FURIN，14238：up|gene14526：PHKB，14526：up|gene14632：ADAMTS18，14632：down|gene15340：ACY1，15340：up|gene15853：DPYSL3，1…
Biological Process	GO:0009065	glutamine family amino acid catabolic process	9	0	0.38	0.03605	--
Biological Process	GO:2000807	regulation of synaptic vesicle clustering	2	0	0.08	0.03607	--
Biological Process	GO:1901629	regulation of presynaptic membrane organization	2	0	0.08	0.03607	--
Biological Process	GO:0097105	presynaptic membrane assembly	3	0	0.13	0.03608	--
Biological Process	GO:0097090	presynaptic membrane organization	3	0	0.13	0.03608	--
Biological Process	GO:0097091	synaptic vesicle clustering	3	0	0.13	0.03608	--
Molecular Function	GO:0001055	RNA polymerase II activity	2	0	0.08	0.03613	--
Biological Process	GO:0060184	cell cycle switching	2	0	0.08	0.03635	--
Biological Process	GO:0051728	cell cycle switching, mitotic to meiotic cell cycle	2	0	0.08	0.03635	--
Biological Process	GO:0051729	germline cell cycle switching, mitotic to meiotic cell cycle	2	0	0.08	0.03635	--
Molecular Function	GO:0005005	transmembrane-ephrin receptor activity	3	1	0.12	0.03636	gene19414：EPHB2，19414：down
Molecular Function	GO:0019900	kinase binding	179	9	7.16	0.03638	Gallus_gallus_newGene_47：LOC110391435，47：up|gene10074：NEK9，10074：up|gene11915：PRKAG3，11915：up|gene16746：MAPKAPK5，16746：up|gene19194：TP73，19194：up|gene20962：CCND3，20962：up|gene23869：PFKM，23869：up|gene25911：GYS1，25911：up|gene26487：GYS1，26487：up
Cellular Component	GO:0035189	Rb-E2F complex	4	0	0.16	0.03645	--
Molecular Function	GO:0016298	lipase activity	67	1	2.68	0.03646	gene18315：PROCA1，18315：up
Molecular Function	GO:0004709	MAP kinase kinase kinase activity	3	0	0.12	0.03646	--
Biological Process	GO:1902745	positive regulation of lamellipodium organization	7	1	0.3	0.03655	gene13603：CLRN1，13603：up
Biological Process	GO:0021889	olfactory bulb interneuron differentiation	7	2	0.3	0.03655	gene11500：ERBB4，11500：up|gene1950：ARX，1950：down
Biological Process	GO:0010592	positive regulation of lamellipodium assembly	7	1	0.3	0.03655	gene13603：CLRN1，13603：up
Cellular Component	GO:0000118	histone deacetylase complex	29	1	1.14	0.03657	gene19557：ZNF703，19557：down
Biological Process	GO:0006903	vesicle targeting	12	0	0.51	0.03666	--
Cellular Component	GO:0008385	IkappaB kinase complex	3	0	0.12	0.03683	--
Molecular Function	GO:0004416	hydroxyacylglutathione hydrolase activity	4	0	0.16	0.03689	--
Molecular Function	GO:0016822	hydrolase activity, acting on acid carbon-carbon bonds	4	0	0.16	0.03693	--
Molecular Function	GO:0016823	hydrolase activity, acting on acid carbon-carbon bonds, in ketonic substances	4	0	0.16	0.03693	--
Biological Process	GO:0007274	neuromuscular synaptic transmission	15	0	0.63	0.037	--
Biological Process	GO:0006094	gluconeogenesis	39	9	1.64	0.03701	Gallus_gallus_newGene_20049：TPI1，20049：up|gene11094：PGAM1，11094：up|gene1312：TPI1，1312：up|gene13174：ADIPOQ，13174：down|gene14592：GPI，14592：up|gene21200：PDK2，21200：down|gene24885：PDK2，24885：down|gene25858：ENO3，25858：up|gene7816：PGK，7816：up
Molecular Function	GO:0004909	interleukin-1, Type I, activating receptor activity	4	0	0.16	0.03705	--
Biological Process	GO:0070125	mitochondrial translational elongation	3	0	0.13	0.03714	--
Biological Process	GO:0018002	N-terminal peptidyl-glutamic acid acetylation	2	0	0.08	0.03715	--
Biological Process	GO:0030920	peptidyl-serine acetylation	2	0	0.08	0.03715	--
Biological Process	GO:0017198	N-terminal peptidyl-serine acetylation	2	0	0.08	0.03715	--
Cellular Component	GO:0031415	NatA complex	2	0	0.08	0.03717	--
Molecular Function	GO:0004896	cytokine receptor activity	46	1	1.84	0.0375	gene22491：CNTFR，22491：up
Biological Process	GO:0033383	geranyl diphosphate metabolic process	4	0	0.17	0.03765	--
Biological Process	GO:0033384	geranyl diphosphate biosynthetic process	4	0	0.17	0.03765	--
Biological Process	GO:0097284	hepatocyte apoptotic process	4	0	0.17	0.03765	--
Biological Process	GO:0071459	protein localization to chromosome, centromeric region	4	0	0.17	0.03765	--
Biological Process	GO:0071930	negative regulation of transcription involved in G1/S transition of mitotic cell cycle	4	0	0.17	0.03765	--
Cellular Component	GO:0005788	endoplasmic reticulum lumen	30	0	1.18	0.03765	--
Biological Process	GO:0035087	siRNA loading onto RISC involved in RNA interference	4	0	0.17	0.03774	--
Biological Process	GO:0035279	mRNA cleavage involved in gene silencing by miRNA	4	0	0.17	0.03774	--
Molecular Function	GO:0051183	vitamin transporter activity	13	0	0.52	0.03782	--
Biological Process	GO:0023057	negative regulation of signaling	373	22	15.73	0.03786	gene10245：DLK1，10245：down|gene1084：LDHB，1084：down0|gene11277：HTRA1，11277：down|gene12279：RGS2，12279：down|gene13174：ADIPOQ，13174：down|gene13225：SERPINE2，13225：down|gene13305：APOD，13305：up|gene15491：SLIT3，15491：down|gene15682：G3BP1，15682：up|gene16746：MAPKAPK5，16746：up|gene17809：NOTUM，17809：up|gene17966：SOCS3，17966：down|gene19194：TP73，19194：up|gene19344：NBL1，19344：down|gene19390：MFN2，19390：up|gene229…
Biological Process	GO:0006991	response to sterol depletion	3	1	0.13	0.03788	gene3532：INSIG1，3532：up
Biological Process	GO:0071501	cellular response to sterol depletion	3	1	0.13	0.03788	gene3532：INSIG1，3532：up
Biological Process	GO:0032933	SREBP signaling pathway	3	1	0.13	0.03788	gene3532：INSIG1，3532：up
Cellular Component	GO:0000421	autophagosome membrane	9	0	0.35	0.03803	--
Cellular Component	GO:0001527	microfibril	2	1	0.08	0.03803	gene1260：MAGP，1260:down
Molecular Function	GO:0060698	endoribonuclease inhibitor activity	2	0	0.08	0.03807	--
Cellular Component	GO:0098723	skeletal muscle myofibril	2	0	0.08	0.03812	--
Cellular Component	GO:0097433	dense body	2	0	0.08	0.03812	--
Biological Process	GO:0060292	long term synaptic depression	8	0	0.34	0.03831	--
Biological Process	GO:0016048	detection of temperature stimulus	3	0	0.13	0.03831	--
Biological Process	GO:0006525	arginine metabolic process	10	1	0.42	0.03832	gene2537：SLC25A15，2537：down
Biological Process	GO:0021591	ventricular system development	8	1	0.34	0.03869	gene13290：ZIC1，13290：down
Molecular Function	GO:0000994	RNA polymerase III core binding	2	0	0.08	0.03876	--
Molecular Function	GO:0016818	hydrolase activity, acting on acid anhydrides, in phosphorus-containing anhydrides	562	25	22.49	0.03879	Gallus_gallus_newGene_15489：CIB84_010615，15489：up|gene1037：RERG，1037：down|gene10995：ACTA2，10995：down|gene1396：POLQ，1396：up|gene16077：GNA12，16077：up|gene16123：RASD1，16123：down|gene17665：MYH1F，17665：down|gene17669：MYH1B，17669：up|gene17671：MYH1E，17671：up|gene17673：MYH1C，17673：down|gene18226：RAD51D，18226：down|gene19390：MFN2，19390：up|gene20684：TUBA1C，20684：up|gene20921：NUDT3，20921：up|gene2150：EIF5B，21…
Biological Process	GO:0070647	protein modification by small protein conjugation or removal	311	18	13.11	0.0389	Gallus_gallus_newGene_16404：UBR4，16404：up|gene10936：FBXL15，10936：up|gene11538：ASB18，11538：down|gene11805：UBR3，11805：up|gene1282：FBXO40，1282：up|gene13202：SPSB4，13202：down|gene13829：FBXO22，13829：up|gene14452：AMFR，14452：up|gene15184：ARIH2，15184：up|gene16120：COPS3，16120：up|gene16853：KLHL22，16853：up|gene17554：UBAC1，17554：up|gene17966：SOCS3，17966：down|gene3364：ASB10，3364：up|gene3743：ASB4，3743：up|gene39…
Molecular Function	GO:0016462	pyrophosphatase activity	558	25	22.33	0.03901	Gallus_gallus_newGene_15489：CIB84_010615，15489：up|gene1037：RERG，1037：down|gene10995：ACTA2，10995：down|gene1396：POLQ，1396：up|gene16077：GNA12，16077：up|gene16123：RASD1，16123：down|gene17665：MYH1F，17665：down|gene17669：MYH1B，17669：up|gene17671：MYH1E，17671：up|gene17673：MYH1C，17673：down|gene18226：RAD51D，18226：down|gene19390：MFN2，19390：up|gene20684：TUBA1C，20684：up|gene20921：NUDT3，20921：up|gene2150：EIF5B，21…
Biological Process	GO:0033194	response to hydroperoxide	6	2	0.25	0.03928	gene186|gene3070：CD36，3070：down
Biological Process	GO:1902749	regulation of cell cycle G2/M phase transition	9	1	0.38	0.03944	gene7663：FHL1，7663：down
Biological Process	GO:0071436	sodium ion export	2	0	0.08	0.0395	--
Biological Process	GO:0036376	sodium ion export from cell	2	0	0.08	0.0395	--
Biological Process	GO:0010107	potassium ion import	2	0	0.08	0.0395	--
Biological Process	GO:0010248	establishment or maintenance of transmembrane electrochemical gradient	2	0	0.08	0.0395	--
Biological Process	GO:0030007	cellular potassium ion homeostasis	2	0	0.08	0.0395	--
Biological Process	GO:1903286	regulation of potassium ion import	2	0	0.08	0.0395	--
Biological Process	GO:1903288	positive regulation of potassium ion import	2	0	0.08	0.0395	--
Biological Process	GO:1903276	regulation of sodium ion export from cell	2	0	0.08	0.0395	--
Biological Process	GO:1903278	positive regulation of sodium ion export from cell	2	0	0.08	0.0395	--
Biological Process	GO:0046777	protein autophosphorylation	89	5	3.75	0.03954	Gallus_gallus_newGene_47：LOC110391435，47：up|gene11500：ERBB4，11500：up|gene13174：ADIPOQ，13174：down|gene15705：CAMK2A，15705：down|gene16746：MAPKAPK5，16746：up
Biological Process	GO:0009895	negative regulation of catabolic process	44	5	1.86	0.0397	gene1206：TIGAR，1206：up|gene13225：SERPINE2，13225：down|gene14238：FURIN，14238：up|gene15528：ADRA1B，15528：down|gene855：TIMP3，855：down
Molecular Function	GO:0016776	phosphotransferase activity, phosphate group as acceptor	23	2	0.92	0.03976	gene16416：NME3，16416：up|gene17386：AK1，17386：up
Biological Process	GO:0050962	detection of light stimulus involved in sensory perception	6	0	0.25	0.03996	--
Biological Process	GO:0050908	detection of light stimulus involved in visual perception	6	0	0.25	0.03996	--
Biological Process	GO:1901989	positive regulation of cell cycle phase transition	13	0	0.55	0.03996	--
Biological Process	GO:0007266	Rho protein signal transduction	97	8	4.09	0.04001	gene13065：ARHGEF4，13065：up|gene16077：GNA12，16077：up|gene17915：CDC42EP4，17915：down|gene23329：LPAR1,23329：down|gene3736：COL1A2，3736：down|gene8406：EPHA5，8406：down|gene9599：HRAS，9599：down|gene9602：HRAS，9602：down
Cellular Component	GO:0045259	proton-transporting ATP synthase complex	13	0	0.51	0.04011	--
Biological Process	GO:1902065	response to L-glutamate	2	0	0.08	0.04017	--
Biological Process	GO:1990441	negative regulation of transcription from RNA polymerase II promoter in response to endoplasmic reticulum stress	2	0	0.08	0.04017	--
Biological Process	GO:1990144	intrinsic apoptotic signaling pathway in response to hypoxia	2	0	0.08	0.04017	--
Biological Process	GO:1902235	regulation of endoplasmic reticulum stress-induced intrinsic apoptotic signaling pathway	2	0	0.08	0.04017	--
Biological Process	GO:1902236	negative regulation of endoplasmic reticulum stress-induced intrinsic apoptotic signaling pathway	2	0	0.08	0.04017	--
Biological Process	GO:0060701	negative regulation of ribonuclease activity	2	0	0.08	0.04017	--
Biological Process	GO:0060702	negative regulation of endoribonuclease activity	2	0	0.08	0.04017	--
Biological Process	GO:0051025	negative regulation of immunoglobulin secretion	2	0	0.08	0.04017	--
Biological Process	GO:1903297	regulation of hypoxia-induced intrinsic apoptotic signaling pathway	2	0	0.08	0.04017	--
Biological Process	GO:1903298	negative regulation of hypoxia-induced intrinsic apoptotic signaling pathway	2	0	0.08	0.04017	--
Biological Process	GO:0009118	regulation of nucleoside metabolic process	167	7	7.04	0.0402	gene12279：RGS2，12279：down|gene14852：TNNC1，14852：up|gene17721：TBCD，17721：up|gene22541：TPM2，22541：down|gene8406：EPHA5，8406：down|gene9599：HRAS，9599：down|gene9602：HRAS，9602：down
Biological Process	GO:0036211	protein modification process	1409	59	59.42	0.04022	Gallus_gallus_newGene_16404：UBR4，16404：up|Gallus_gallus_newGene_21022：ALPK3，21022：up|Gallus_gallus_newGene_21069：PHKB，21069：up|Gallus_gallus_newGene_47：LOC110391435，47：up|gene10010：EGLN3，10010：up|gene10936：FBXL15，10936：up|gene11500：ERBB4，11500：up|gene11538：ASB18，11538：down|gene11805：UBR3，11805：up|gene12279：RGS2，12279：down|gene1282：FBXO40，1282：up|gene13174：ADIPOQ，13174：down|gene13202：SPSB4，13202：d…
Biological Process	GO:0006464	cellular protein modification process	1409	59	59.42	0.04022	Gallus_gallus_newGene_16404：UBR4，16404：up|Gallus_gallus_newGene_21022：ALPK3，21022：up|Gallus_gallus_newGene_21069：PHKB，21069：up|Gallus_gallus_newGene_47：LOC110391435，47：up|gene10010：EGLN3，10010：up|gene10936：FBXL15，10936：up|gene11500：ERBB4，11500：up|gene11538：ASB18，11538：down|gene11805：UBR3，11805：up|gene12279：RGS2，12279：down|gene1282：FBXO40，1282：up|gene13174：ADIPOQ，13174：down|gene13202：SPSB4，13202：d…
Biological Process	GO:0034308	primary alcohol metabolic process	8	1	0.34	0.04028	gene22950：ALDH1A1，22950：up
Molecular Function	GO:0017111	nucleoside-triphosphatase activity	534	23	21.37	0.0403	Gallus_gallus_newGene_15489：CIB84_010615，15489：up|gene1037：RERG，1037：down|gene10995：ACTA2，10995：down|gene1396：POLQ，1396：up|gene16077：GNA12，16077：up|gene16123：RASD1，16123：down|gene17665：MYH1F，17665：down|gene17669：MYH1B，17669：up|gene17671：MYH1E，17671：up|gene17673：MYH1C，17673：down|gene18226：RAD51D，18226：down|gene19390：MFN2，19390：up|gene20684：TUBA1C，20684：up|gene2150：EIF5B，2150：up|gene3361：ABCF2，3361…
Biological Process	GO:0009435	NAD biosynthetic process	9	1	0.38	0.04032	gene226
Biological Process	GO:0060729	intestinal epithelial structure maintenance	5	0	0.21	0.04034	--
Biological Process	GO:0043412	macromolecule modification	1467	61	61.86	0.04038	Gallus_gallus_newGene_16404：UBR4，16404：up|Gallus_gallus_newGene_21022：ALPK3，21022：up|Gallus_gallus_newGene_21069：PHKB，21069：up|Gallus_gallus_newGene_47：LOC110391435，47：up|gene10010：EGLN3，10010：up|gene10936：FBXL15，10936：up|gene11500：ERBB4，11500：up|gene11538：ASB18，11538：down|gene11805：UBR3，11805：up|gene12279：RGS2，12279：down|gene1282：FBXO40，1282：up|gene13174：ADIPOQ，13174：down|gene13202：SPSB4，13202：d…
Biological Process	GO:0015672	monovalent inorganic cation transport	163	10	6.87	0.04043	Gallus_gallus_newGene_24651：LOC102114762，24651：up|Gallus_gallus_newGene_6113：ND5，6113：up|gene13225：SERPINE2，13225：down|gene17903：KCNJ2，17903：down|gene19185：KCNAB2，19185：down|gene373|gene402：SLC38A2，402：down|gene6269：KCNK1，6269：up|gene6874：KCNQ5，6874：up|gene7663：FHL1，7663：down
Molecular Function	GO:0030911	TPR domain binding	4	0	0.16	0.0405	--
Biological Process	GO:0007062	sister chromatid cohesion	30	0	1.27	0.04053	--
Biological Process	GO:0021587	cerebellum morphogenesis	22	1	0.93	0.04066	gene13225：SERPINE2，13225：down
Biological Process	GO:0016071	mRNA metabolic process	175	6	7.38	0.04072	gene13590：MBNL1，13590：up|gene15468：etf1，15468：up|gene16135：ALKBH5，gene16135：up|gene16328：RBFOX1，16328：down|gene17754：JMJD6，17754：up|gene7037：DDX1，7037：up
Biological Process	GO:0045947	negative regulation of translational initiation	6	0	0.25	0.04076	--
Biological Process	GO:0070217	transcription factor TFIIIB complex assembly	2	0	0.08	0.04094	--
Biological Process	GO:0044804	autophagy of nucleus	2	0	0.08	0.04105	--
Biological Process	GO:0045835	negative regulation of meiotic nuclear division	8	0	0.34	0.0413	--
Biological Process	GO:0043330	response to exogenous dsRNA	7	1	0.3	0.04137	gene7037：DDX1，7037：up
Biological Process	GO:1901605	alpha-amino acid metabolic process	112	6	4.72	0.04153	gene10010：EGLN3，10010：up|gene22325：CARNS1，22325：up|gene22733：BHMT，22733：up|gene2537：SLC25A15，2537：down|gene3877：HIBADH，3877：up|gene6684：DDO，6684：up
Biological Process	GO:0060316	positive regulation of ryanodine-sensitive calcium-release channel activity	6	0	0.25	0.04157	--
Biological Process	GO:0030811	regulation of nucleotide catabolic process	164	7	6.92	0.04164	gene12279：RGS2，12279：down|gene14852：TNNC1，14852：up|gene17721：TBCD，17721：up|gene22541：TPM2，22541：down|gene8406：EPHA5，8406：down|gene9599：HRAS，9599：down|gene9602：HRAS，9602：down
Biological Process	GO:0033121	regulation of purine nucleotide catabolic process	164	7	6.92	0.04164	gene12279：RGS2，12279：down|gene14852：TNNC1，14852：up|gene17721：TBCD，17721：up|gene22541：TPM2，22541：down|gene8406：EPHA5，8406：down|gene9599：HRAS，9599：down|gene9602：HRAS，9602：down
Biological Process	GO:0006984	ER-nucleus signaling pathway	26	2	1.1	0.04171	gene14452：AMFR，14452：up|gene3532：INSIG1，3532：up
Molecular Function	GO:0043492	ATPase activity, coupled to movement of substances	81	1	3.24	0.04187	gene5351：ABCB8，5351：down
Molecular Function	GO:0004866	endopeptidase inhibitor activity	73	5	2.92	0.04194	gene13225：SERPINE2，13225：down|gene14238：FURIN，14238：up|gene17961：TIMP2，17961：down|gene6864：CD109，6864：down|gene855：TIMP3，855：down
Biological Process	GO:0048588	developmental cell growth	40	5	1.69	0.04215	gene12741：FOXD2，12741：down|gene14973：SEMA3F，14973：down|gene15184：ARIH2，15184：up|gene15491：SLIT3，15491：down|gene5849：TTL，gene5849：up
Molecular Function	GO:0004029	aldehyde dehydrogenase (NAD) activity	3	0	0.12	0.04243	--
Molecular Function	GO:0008013	beta-catenin binding	34	1	1.36	0.04296	gene4802：SOX17，4802：down
Molecular Function	GO:0004674	protein serine/threonine kinase activity	310	17	12.41	0.04322	Gallus_gallus_newGene_21022：ALPK3，21022：up|Gallus_gallus_newGene_21069：PHKB，21069：up|Gallus_gallus_newGene_47：LOC110391435，47：up|gene10074：NEK9，10074：up|gene13715：ALPK3，13715：up|gene153|gene15705：CAMK2A，15705：down|gene16746：MAPKAPK5，16746：up|gene16919：CIT，16919：down|gene20822：DYRK3，20822：up|gene20962：CCND3，20962：up|gene22615：NIM1K，22615：up|gene22713：MAST4，22713：up|gene23528：NIM1K，23528：up|gene282…
Biological Process	GO:0006470	protein dephosphorylation	81	3	3.42	0.04331	gene13478：NCEH1，13478：up|gene19548：DUSP26，19548：down|gene6898：PTP4A1，6898：up
Cellular Component	GO:0032838	cell projection cytoplasm	8	1	0.31	0.04332	gene17386：AK1，17386：up
Molecular Function	GO:0061135	endopeptidase regulator activity	77	5	3.08	0.04332	gene13225：SERPINE2，13225：down|gene14238：FURIN，14238：up|gene17961：TIMP2，17961：down|gene6864：CD109，6864：down|gene855：TIMP3，855：down
Cellular Component	GO:0070765	gamma-secretase complex	2	0	0.08	0.04345	--
Biological Process	GO:1902175	regulation of oxidative stress-induced intrinsic apoptotic signaling pathway	2	0	0.08	0.04349	--
Biological Process	GO:1902177	positive regulation of oxidative stress-induced intrinsic apoptotic signaling pathway	2	0	0.08	0.04349	--
Biological Process	GO:1902884	positive regulation of response to oxidative stress	2	0	0.08	0.04349	--
Biological Process	GO:0036480	neuron intrinsic apoptotic signaling pathway in response to oxidative stress	2	0	0.08	0.04349	--
Biological Process	GO:0036475	neuron death in response to oxidative stress	2	0	0.08	0.04349	--
Biological Process	GO:1900409	positive regulation of cellular response to oxidative stress	2	0	0.08	0.04349	--
Biological Process	GO:1903376	regulation of oxidative stress-induced neuron intrinsic apoptotic signaling pathway	2	0	0.08	0.04349	--
Biological Process	GO:1903378	positive regulation of oxidative stress-induced neuron intrinsic apoptotic signaling pathway	2	0	0.08	0.04349	--
Biological Process	GO:1903146	regulation of autophagy of mitochondrion	2	1	0.08	0.04349	gene1206：TIGAR，1206：up
Biological Process	GO:1903203	regulation of oxidative stress-induced neuron death	2	0	0.08	0.04349	--
Biological Process	GO:0022604	regulation of cell morphogenesis	164	10	6.92	0.04359	Gallus_gallus_newGene_47：LOC110391435，47：up|gene14973：SEMA3F，14973：down|gene16077：GNA12，16077：up|gene16919：CIT，16919：down|gene17915：CDC42EP4，17915：down|gene19414：EPHB2，19414：down|gene1985：SH3KBP1，1985：up|gene5849：TTL，gene5849：up|gene6062：RHOQ，6062：up|gene6283：RHOU，6283：up
Molecular Function	GO:0016832	aldehyde-lyase activity	6	2	0.24	0.04376	Gallus_gallus_newGene_25321：LOC104917114，25321：up|gene25417：ALDOA，25417：up
Biological Process	GO:0051983	regulation of chromosome segregation	20	0	0.84	0.04378	--
Biological Process	GO:0010508	positive regulation of autophagy	18	1	0.76	0.04394	gene20951：TFEB，20951：up
Biological Process	GO:0010669	epithelial structure maintenance	8	0	0.34	0.04412	--
Biological Process	GO:2000401	regulation of lymphocyte migration	11	1	0.46	0.04413	gene13305：APOD，13305：up
Cellular Component	GO:0044297	cell body	75	6	2.94	0.04443	gene19414：EPHB2，19414：down|gene25858：ENO3，25858：up|gene3890：BTD，3890：down|gene4218：NRSN1，4218：up|gene7634：FRMD7，7634：up|gene8806：DPYSL2，8806：down
Biological Process	GO:0006086	acetyl-CoA biosynthetic process from pyruvate	6	3	0.25	0.0445	gene21200：PDK2，21200：down|gene24885：PDK2，24885：down|gene3742：PDK4，3742：down
Molecular Function	GO:0004947	bradykinin receptor activity	2	0	0.08	0.0447	--
Biological Process	GO:0016310	phosphorylation	874	36	36.86	0.04471	Gallus_gallus_newGene_18494：LOC109365375，18494：up|Gallus_gallus_newGene_21022：ALPK3，21022：up|Gallus_gallus_newGene_21069：PHKB，21069：up|Gallus_gallus_newGene_47：LOC110391435，47：up|Gallus_gallus_newGene_6113：ND5，6113：up|gene11500：ERBB4，11500：up|gene12279：RGS2，12279：down|gene13174：ADIPOQ，13174：down|gene13715：ALPK3，13715：up|gene14094：NR2F2，14094：down|gene153|gene15528：ADRA1B，15528：down|gene15705：CAMK…
Cellular Component	GO:0071953	elastic fiber	2	0	0.08	0.04478	--
Biological Process	GO:0034097	response to cytokine	168	4	7.08	0.04486	gene10986：CXCL12，10986：down|gene13174：ADIPOQ，13174：down|gene15491：SLIT3，15491：down|gene4734：AQP4，4734：up
Biological Process	GO:1902284	neuron projection extension involved in neuron projection guidance	15	3	0.63	0.04486	gene12741：FOXD2，12741：down|gene14973：SEMA3F，14973：down|gene15491：SLIT3，15491：down
Biological Process	GO:0048846	axon extension involved in axon guidance	15	3	0.63	0.04486	gene12741：FOXD2，12741：down|gene14973：SEMA3F，14973：down|gene15491：SLIT3，15491：down
Biological Process	GO:0046530	photoreceptor cell differentiation	33	0	1.39	0.04493	--
Molecular Function	GO:0008469	histone-arginine N-methyltransferase activity	3	0	0.12	0.04525	--
Biological Process	GO:0010990	regulation of SMAD protein complex assembly	3	1	0.13	0.04538	gene4085：TBX20，4085：down
Biological Process	GO:0010991	negative regulation of SMAD protein complex assembly	3	1	0.13	0.04538	gene4085：TBX20，4085：down
Biological Process	GO:0035721	intraciliary retrograde transport	2	0	0.08	0.04546	--
Biological Process	GO:0031054	pre-miRNA processing	9	0	0.38	0.04562	--
Biological Process	GO:0009129	pyrimidine nucleoside monophosphate metabolic process	9	0	0.38	0.04567	--
Molecular Function	GO:0017022	myosin binding	10	1	0.4	0.04572	gene10995：ACTA2，10995：down
Molecular Function	GO:0030235	nitric-oxide synthase regulator activity	2	0	0.08	0.0459	--
Biological Process	GO:0071313	cellular response to caffeine	3	0	0.13	0.04607	--
Biological Process	GO:0071415	cellular response to purine-containing compound	3	0	0.13	0.04607	--
Biological Process	GO:0097485	neuron projection guidance	83	10	3.5	0.04607	gene10986：CXCL12，10986：down|gene12741：FOXD2，12741：down|gene14973：SEMA3F，14973：down|gene15491：SLIT3，15491：down|gene19414：EPHB2，19414：down|gene1950：ARX，1950：down|gene3533：EN2，3533：down|gene5570：EN2，5570：down|gene8406：EPHA5，8406：down|gene8507：UNC5C，8507：down
Biological Process	GO:0007411	axon guidance	83	10	3.5	0.04607	gene10986：CXCL12，10986：down|gene12741：FOXD2，12741：down|gene14973：SEMA3F，14973：down|gene15491：SLIT3，15491：down|gene19414：EPHB2，19414：down|gene1950：ARX，1950：down|gene3533：EN2，3533：down|gene5570：EN2，5570：down|gene8406：EPHA5，8406：down|gene8507：UNC5C，8507：down
Molecular Function	GO:0004035	alkaline phosphatase activity	5	0	0.2	0.04623	--
Molecular Function	GO:0061134	peptidase regulator activity	91	6	3.64	0.04652	gene13225：SERPINE2，13225：down|gene14238：FURIN，14238：up|gene17961：TIMP2，17961：down|gene4933：PI15，4933：down|gene6864：CD109，6864：down|gene855：TIMP3，855：down
Molecular Function	GO:0042626	ATPase activity, coupled to transmembrane movement of substances	80	1	3.2	0.04667	gene5351：ABCB8，5351：down
Cellular Component	GO:0005876	spindle microtubule	25	1	0.98	0.0468	gene16853：KLHL22，16853：up
Biological Process	GO:0032623	interleukin-2 production	20	1	0.84	0.04692	gene11190：GPAM，11190：down
Biological Process	GO:0006561	proline biosynthetic process	6	0	0.25	0.04697	--
Biological Process	GO:0071804	cellular potassium ion transport	38	3	1.6	0.04707	gene6269：KCNK1，6269：up|gene6874：KCNQ5，6874：up|gene7663：FHL1，7663：down
Biological Process	GO:0071805	potassium ion transmembrane transport	38	3	1.6	0.04707	gene6269：KCNK1，6269：up|gene6874：KCNQ5，6874：up|gene7663：FHL1，7663：down
Biological Process	GO:0034587	piRNA metabolic process	4	0	0.17	0.0474	--
Biological Process	GO:0051291	protein heterooligomerization	15	3	0.63	0.04742	gene11571：COL6A2，11571：down|gene13174：ADIPOQ，13174：down|gene3736：COL1A2，3736：down
Biological Process	GO:0048167	regulation of synaptic plasticity	40	7	1.69	0.04744	gene13225：SERPINE2，13225：down|gene14698：JPH3，14698：up|gene14699：JPH3，14699：up|gene15705：CAMK2A，15705：down|gene19414：EPHB2，19414：down|gene9599：HRAS，9599：down|gene9602：HRAS，9602：down
Biological Process	GO:0007064	mitotic sister chromatid cohesion	10	0	0.42	0.04749	--
Biological Process	GO:0038031	non-canonical Wnt signaling pathway via JNK cascade	4	0	0.17	0.04751	--
Biological Process	GO:0034259	negative regulation of GTPase activity	4	2	0.17	0.04751	gene9599：HRAS，9599：down|gene9602：HRAS，9602：down
Molecular Function	GO:0005261	cation channel activity	176	10	7.04	0.04761	Gallus_gallus_newGene_24651：LOC102114762，24651：up|gene11853：KCNH7，11853：down|gene13219：KCNE4，13219：down|gene14698：JPH3，14698：up|gene14699：JPH3，14699：up|gene17903：KCNJ2，17903：down|gene19185：KCNAB2，19185：down|gene6269：KCNK1，6269：up|gene6874：KCNQ5，6874：up|gene9947：RYR3，9947：up
Biological Process	GO:0034969	histone arginine methylation	3	0	0.13	0.04765	--
Biological Process	GO:0021680	cerebellar Purkinje cell layer development	19	0	0.8	0.04772	--
Molecular Function	GO:0042578	phosphoric ester hydrolase activity	237	15	9.48	0.04779	gene11094：PGAM1，11094：up|gene16202：PGP，16202：up|gene19548：DUSP26，19548：down|gene21821：PDE4C，21821：down|gene22606：PLCXD3，22606：down|gene23004：FBP2，23004：up|gene2920：GDPD5，2920：down|gene4634：IMPA2，4634：up|gene6074：PLB1，6074：down|gene6459：SYNJ2，6459：down|gene6898：PTP4A1，6898：up|gene7147：EPHX2，7147：down|gene7201：MTMR9，7201：up|gene8588：MTMR7，8588：up|gene9557：-，9557：up
Biological Process	GO:0007602	phototransduction	18	1	0.76	0.04781	gene24189：OPN1LW，24189：down
Molecular Function	GO:0016817	hydrolase activity, acting on acid anhydrides	566	25	22.65	0.04794	Gallus_gallus_newGene_15489：CIB84_010615，15489：up|gene1037：RERG，1037：down|gene10995：ACTA2，10995：down|gene1396：POLQ，1396：up|gene16077：GNA12，16077：up|gene16123：RASD1，16123：down|gene17665：MYH1F，17665：down|gene17669：MYH1B，17669：up|gene17671：MYH1E，17671：up|gene17673：MYH1C，17673：down|gene18226：RAD51D，18226：down|gene19390：MFN2，19390：up|gene20684：TUBA1C，20684：up|gene20921：NUDT3，20921：up|gene2150：EIF5B，21…
Biological Process	GO:0002504	antigen processing and presentation of peptide or polysaccharide antigen via MHC class II	17	0	0.72	0.04819	--
Biological Process	GO:0022029	telencephalon cell migration	22	1	0.93	0.0482	gene1950：ARX，1950：down
Biological Process	GO:0031999	negative regulation of fatty acid beta-oxidation	2	0	0.08	0.04855	--
Biological Process	GO:0032060	bleb assembly	4	1	0.17	0.04856	gene23329：LPAR1,23329：down
Biological Process	GO:0001678	cellular glucose homeostasis	22	0	0.93	0.04861	--
Molecular Function	GO:0005544	calcium-dependent phospholipid binding	15	0	0.6	0.04877	--
Cellular Component	GO:0043034	costamere	7	1	0.27	0.04886	gene1974：SMPX，1974：down
Molecular Function	GO:0004652	polynucleotide adenylyltransferase activity	2	0	0.08	0.04886	--
Biological Process	GO:0045650	negative regulation of macrophage differentiation	6	1	0.25	0.04893	gene13174：ADIPOQ，13174：down
Biological Process	GO:0033313	meiotic cell cycle checkpoint	5	0	0.21	0.04895	--
Biological Process	GO:0042138	meiotic DNA double-strand break formation	5	0	0.21	0.04895	--
Biological Process	GO:0021533	cell differentiation in hindbrain	14	0	0.59	0.04904	--
Biological Process	GO:0071545	inositol phosphate catabolic process	8	3	0.34	0.04904	gene20921：NUDT3，20921：up|gene4634：IMPA2，4634：up|gene8588：MTMR7，8588：up
Molecular Function	GO:0004520	endodeoxyribonuclease activity	20	0	0.8	0.04905	--
Biological Process	GO:0039019	pronephric nephron development	6	0	0.25	0.0492	--
Biological Process	GO:0008203	cholesterol metabolic process	49	2	2.07	0.04924	gene3532：INSIG1，3532：up|gene7147：EPHX2，7147：down
Molecular Function	GO:0005024	transforming growth factor beta-activated receptor activity	10	0	0.4	0.04927	--
Molecular Function	GO:0004675	transmembrane receptor protein serine/threonine kinase activity	10	0	0.4	0.04927	--
Molecular Function	GO:0000993	RNA polymerase II core binding	10	0	0.4	0.04969	--
Molecular Function	GO:0017112	Rab guanyl-nucleotide exchange factor activity	10	0	0.4	0.04972	--
Biological Process	GO:0032649	regulation of interferon-gamma production	23	1	0.97	0.04984	gene20242：IL18，20242：down
Biological Process	GO:0008063	Toll signaling pathway	2	0	0.08	0.0499	--
Biological Process	GO:0097212	lysosomal membrane organization	3	0	0.13	0.04992	--
Biological Process	GO:0010940	positive regulation of necrotic cell death	3	0	0.13	0.04992	--
Cellular Component	GO:0031970	organelle envelope lumen	24	0	0.94	0.04997	--
Molecular Function	GO:0004550	nucleoside diphosphate kinase activity	13	2	0.52	0.05014	gene16416：NME3，16416：up|gene17386：AK1，17386：up
Cellular Component	GO:1902554	serine/threonine protein kinase complex	20	1	0.78	0.05023	Gallus_gallus_newGene_21069：PHKB，21069：up
Biological Process	GO:0045066	regulatory T cell differentiation	5	0	0.21	0.05045	--
Molecular Function	GO:0022832	voltage-gated channel activity	103	6	4.12	0.05066	Gallus_gallus_newGene_24651：LOC102114762，24651：up|gene11853：KCNH7，11853：down|gene13219：KCNE4，13219：down|gene17903：KCNJ2，17903：down|gene19185：KCNAB2，19185：down|gene6874：KCNQ5，6874：up
Molecular Function	GO:0005244	voltage-gated ion channel activity	103	6	4.12	0.05066	Gallus_gallus_newGene_24651：LOC102114762，24651：up|gene11853：KCNH7，11853：down|gene13219：KCNE4，13219：down|gene17903：KCNJ2，17903：down|gene19185：KCNAB2，19185：down|gene6874：KCNQ5，6874：up
Cellular Component	GO:0005641	nuclear envelope lumen	7	0	0.27	0.05112	--
Molecular Function	GO:0034416	bisphosphoglycerate phosphatase activity	2	1	0.08	0.05147	gene11094：PGAM1，11094：up
Biological Process	GO:0010721	negative regulation of cell development	62	3	2.61	0.05153	gene14973：SEMA3F，14973：down|gene16919：CIT，16919：down|gene19414：EPHB2，19414：down
Cellular Component	GO:0005581	collagen trimer	49	9	1.92	0.05154	Gallus_gallus_newGene_23591：COL3A1，23591：down|gene11472：COL3A1，11472：down|gene11571：COL6A2，11571：down|gene13174：ADIPOQ，13174：down|gene16157：C1QTNF1，16157：down|gene20146：C1QTNF5，20146：down|gene24026：COL1A1，24026：down|gene3736：COL1A2，3736：down|gene5132：COL14A1，5132：down
Cellular Component	GO:0005829	cytosol	501	25	19.65	0.05165	Gallus_gallus_newGene_20049：TPI1，20049：up|gene1067：BCAT1，1067：up|gene1084：LDHB，1084：down|gene11094：PGAM1，11094：up|gene12279：RGS2，12279：down|gene1312：TPI1，1312：up|gene13225：SERPINE2，13225：down|gene1374：TBX15，1374：down|gene13746：PKM，13746：up|gene14696：MAP1LC3B，14696：up|gene14852：TNNC1，14852：up|gene16182：RPL3L，16182：up|gene1749：GART，1749：up|gene17820：TOM1，17820：down|gene21795：HOMER3，21795：up|gene238…
Molecular Function	GO:0008281	sulfonylurea receptor activity	2	0	0.08	0.05185	--
Biological Process	GO:1901616	organic hydroxy compound catabolic process	28	4	1.18	0.05192	Gallus_gallus_newGene_20049：TPI1，20049：up|gene20921：NUDT3，20921：up|gene4634：IMPA2，4634：up|gene8588：MTMR7，8588：up
Biological Process	GO:0072527	pyrimidine-containing compound metabolic process	42	3	1.77	0.05208	gene15853：DPYSL3，15853：down|gene16416：NME3，16416：up|gene8806：DPYSL2，8806：down
Biological Process	GO:0008595	anterior/posterior axis specification, embryo	7	0	0.3	0.05238	--
Biological Process	GO:0007351	tripartite regional subdivision	7	0	0.3	0.05238	--
Biological Process	GO:0070173	regulation of enamel mineralization	2	0	0.08	0.05244	--
Biological Process	GO:0010070	zygote asymmetric cell division	2	0	0.08	0.05244	--
Biological Process	GO:0030422	production of siRNA involved in RNA interference	2	0	0.08	0.05244	--
Molecular Function	GO:0015399	primary active transmembrane transporter activity	84	1	3.36	0.05249	gene5351：ABCB8，5351：down
Molecular Function	GO:0015405	P-P-bond-hydrolysis-driven transmembrane transporter activity	84	1	3.36	0.05249	gene5351：ABCB8，5351：down
Biological Process	GO:0007517	muscle organ development	160	14	6.75	0.05256	gene10995：ACTA2，10995：down|gene11500：ERBB4，11500：up|gene13590：MBNL1，13590：up|gene14094：NR2F2，14094：down|gene14852：TNNC1，14852：up|gene15774：PITX1，15774：down|gene17515：RXRA，17515：up|gene20192：TAGLN，20192：down|gene21609|gene22491：CNTFR，22491：up|gene24320：NR4A1，24320：up|gene4085：TBX20，4085：down|gene8492：PITX2，8492：down|gene8898：ATOH8，8898：down
Biological Process	GO:0034111	negative regulation of homotypic cell-cell adhesion	5	2	0.21	0.05262	gene13225：SERPINE2，13225：down|gene19557：ZNF703，19557：down
Biological Process	GO:0015893	drug transport	4	1	0.17	0.05269	gene18377：SLC47A2，18377：down
Molecular Function	GO:0015459	potassium channel regulator activity	5	0	0.2	0.05269	--
Biological Process	GO:0043113	receptor clustering	7	1	0.3	0.05275	gene2823：PAK1，2823：down
Biological Process	GO:0080111	DNA demethylation	7	0	0.3	0.05277	--
Biological Process	GO:0060024	rhythmic synaptic transmission	2	0	0.08	0.05312	--
Biological Process	GO:0061077	chaperone-mediated protein folding	18	0	0.76	0.05335	--
Cellular Component	GO:0045095	keratin filament	10	0	0.39	0.05339	--
Biological Process	GO:2000481	positive regulation of cAMP-dependent protein kinase activity	2	1	0.08	0.05363	gene13174：ADIPOQ，13174：down
Biological Process	GO:0034205	amyloid-beta formation	2	0	0.08	0.05371	--
Biological Process	GO:0046889	positive regulation of lipid biosynthetic process	20	0	0.84	0.05389	--
Biological Process	GO:0009063	cellular amino acid catabolic process	40	2	1.69	0.05404	gene1067：BCAT1，1067：up|gene6684：DDO，6684：up
Molecular Function	GO:0001517	N-acetylglucosamine 6-O-sulfotransferase activity	3	0	0.12	0.05413	--
Molecular Function	GO:0070546	L-phenylalanine aminotransferase activity	3	0	0.12	0.05437	--
Molecular Function	GO:0004069	L-aspartate:2-oxoglutarate aminotransferase activity	3	0	0.12	0.05437	--
Molecular Function	GO:0080130	L-phenylalanine:2-oxoglutarate aminotransferase activity	3	0	0.12	0.05437	--
Cellular Component	GO:1902911	protein kinase complex	32	2	1.26	0.05467	Gallus_gallus_newGene_21069：PHKB，21069：up|gene20962：CCND3，20962：up
Biological Process	GO:0033003	regulation of mast cell activation	11	0	0.46	0.05485	--
Cellular Component	GO:0044429	mitochondrial part	302	11	11.85	0.05491	Gallus_gallus_newGene_6113：ND5，6113：up|gene11190：GPAM，11190：down|gene19390：MFN2，19390：up|gene21200：PDK2，21200：down|gene23265：CKMT2，23265：up|gene2469：SLC25A30，2469：up|gene24885：PDK2，24885：down|gene3742：PDK4，3742：down|gene5351：ABCB8，5351：down|gene6345：-，6345：up|gene8905：MIC60，8905：up
Biological Process	GO:0050770	regulation of axonogenesis	45	3	1.9	0.05509	gene14973：SEMA3F，14973：down|gene19414：EPHB2，19414：down|gene5849：TTL，gene5849：up
Biological Process	GO:0044848	biological phase	15	1	0.63	0.05523	gene20078：BARX2，20078：down
Molecular Function	GO:0043167	ion binding	3600	158	144.06	0.05537	Gallus_gallus_newGene_15489：CIB84_010615，15489：up|Gallus_gallus_newGene_16404：UBR4，16404：up|Gallus_gallus_newGene_21022：ALPK3，21022：up|Gallus_gallus_newGene_23591：COL3A1，23591：down|Gallus_gallus_newGene_25030：PYGM，25030：up|Gallus_gallus_newGene_47：LOC110391435，47：up|Gallus_gallus_newGene_6113：ND5，6113：up|gene10010：EGLN3，10010：up|gene10074：NEK9，10074：up|gene10245：DLK1，10245：down|gene10337：ZBTB25，1…
Molecular Function	GO:0004114	3',5'-cyclic-nucleotide phosphodiesterase activity	20	1	0.8	0.05548	gene21821：PDE4C，21821：down
Biological Process	GO:0060219	camera-type eye photoreceptor cell differentiation	10	0	0.42	0.0555	--
Biological Process	GO:0048199	vesicle targeting, to, from or within Golgi	7	0	0.3	0.05553	--
Biological Process	GO:1902591	single-organism membrane budding	7	1	0.3	0.05553	gene3532：INSIG1，3532：up
Biological Process	GO:0070206	protein trimerization	15	3	0.63	0.05557	gene11571：COL6A2，11571：down|gene13174：ADIPOQ，13174：down|gene3736：COL1A2，3736：down
Molecular Function	GO:0001085	RNA polymerase II transcription factor binding	49	2	1.96	0.05566	gene4085：TBX20，4085：down|gene8492：PITX2，8492：down
Biological Process	GO:0051560	mitochondrial calcium ion homeostasis	4	1	0.17	0.05586	gene8905：MIC60，8905：up
Biological Process	GO:1901099	negative regulation of signal transduction in absence of ligand	2	0	0.08	0.05588	--
Biological Process	GO:2001240	negative regulation of extrinsic apoptotic signaling pathway in absence of ligand	2	0	0.08	0.05588	--
Molecular Function	GO:0019901	protein kinase binding	156	8	6.24	0.05598	Gallus_gallus_newGene_47：LOC110391435，47：up|gene10074：NEK9，10074：up|gene11915：PRKAG3，11915：up|gene16746：MAPKAPK5，16746：up|gene19194：TP73，19194：up|gene20962：CCND3，20962：up|gene25911：GYS1，25911：up|gene26487：GYS1，26487：up
Molecular Function	GO:0016681	oxidoreductase activity, acting on diphenols and related substances as donors, cytochrome as acceptor	6	1	0.24	0.05599	Gallus_gallus_newGene_6113：ND5，6113：up
Molecular Function	GO:0016679	oxidoreductase activity, acting on diphenols and related substances as donors	6	1	0.24	0.05599	Gallus_gallus_newGene_6113：ND5，6113：up
Molecular Function	GO:0008121	ubiquinol-cytochrome-c reductase activity	6	1	0.24	0.05599	Gallus_gallus_newGene_6113：ND5，6113：up
Biological Process	GO:0034260	negative regulation of GTPase activity	10	2	0.42	0.05606	gene9599：HRAS，9599：down|gene9602：HRAS，9602：down
Biological Process	GO:0061061	muscle structure development	269	20	11.34	0.05608	gene10995：ACTA2，10995：down|gene11500：ERBB4，11500：up|gene1282：FBXO40，1282：up|gene13590：MBNL1，13590：up|gene13829：FBXO22，13829：up|gene14094：NR2F2，14094：down|gene14852：TNNC1，14852：up|gene15774：PITX1，15774：down|gene17515：RXRA，17515：up|gene20078：BARX2，20078：down|gene20192：TAGLN，20192：down|gene21609|gene22491：CNTFR，22491：up|gene23405：TMOD1，23405：down|gene24320：NR4A1，24320：up|gene4085：TBX20，4085：down|gen…
Molecular Function	GO:0004683	calmodulin-dependent protein kinase activity	7	2	0.28	0.05619	Gallus_gallus_newGene_21069：PHKB，21069：up|gene15705：CAMK2A，15705：down
Biological Process	GO:0009251	glucan catabolic process	6	2	0.25	0.0562	Gallus_gallus_newGene_25030：PYGM，25030：up|gene15528：ADRA1B，15528：down
Biological Process	GO:0000272	polysaccharide catabolic process	6	2	0.25	0.0562	Gallus_gallus_newGene_25030：PYGM，25030：up|gene15528：ADRA1B，15528：down
Biological Process	GO:0044247	cellular polysaccharide catabolic process	6	2	0.25	0.0562	Gallus_gallus_newGene_25030：PYGM，25030：up|gene15528：ADRA1B，15528：down
Biological Process	GO:0005980	glycogen catabolic process	6	2	0.25	0.0562	Gallus_gallus_newGene_25030：PYGM，25030：up|gene15528：ADRA1B，15528：down
Biological Process	GO:0010738	regulation of protein kinase A signaling	4	1	0.17	0.05624	gene13174：ADIPOQ，13174：down
Biological Process	GO:0010739	positive regulation of protein kinase A signaling	4	1	0.17	0.05624	gene13174：ADIPOQ，13174：down
Biological Process	GO:0006006	glucose metabolic process	85	14	3.58	0.05626	Gallus_gallus_newGene_20049：TPI1，20049：up|gene11094：PGAM1，11094：up|gene1312：TPI1，1312：up|gene13174：ADIPOQ，13174：down|gene13305：APOD，13305：up|gene14592：GPI，14592：up|gene15528：ADRA1B，15528：down|gene17803：DCXR，17803：down|gene21200：PDK2，21200：down|gene24885：PDK2，24885：down|gene25858：ENO3，25858：up|gene3742：PDK4，3742：down|gene3877：HIBADH，3877：up|gene7816：PGK，7816：up
Biological Process	GO:0019319	hexose biosynthetic process	42	9	1.77	0.05643	Gallus_gallus_newGene_20049：TPI1，20049：up|gene11094：PGAM1，11094：up|gene1312：TPI1，1312：up|gene13174：ADIPOQ，13174：down|gene14592：GPI，14592：up|gene21200：PDK2，21200：down|gene24885：PDK2，24885：down|gene25858：ENO3，25858：up|gene7816：PGK，7816：up
Biological Process	GO:2000097	regulation of smooth muscle cell-matrix adhesion	2	1	0.08	0.05668	gene13305：APOD，13305：up
Biological Process	GO:0061302	smooth muscle cell-matrix adhesion	2	1	0.08	0.05668	gene13305：APOD，13305：up
Biological Process	GO:0070207	protein homotrimerization	9	0	0.38	0.05678	--
Molecular Function	GO:0030414	peptidase inhibitor activity	76	6	3.04	0.05702	gene13225：SERPINE2，13225：down|gene14238：FURIN，14238：up|gene17961：TIMP2，17961：down|gene4933：PI15，4933：down|gene6864：CD109，6864：down|gene855：TIMP3，855：down
Biological Process	GO:0070585	protein localization to mitochondrion	24	1	1.01	0.05705	gene19390：MFN2，19390：up
Molecular Function	GO:0016627	oxidoreductase activity, acting on the CH-CH group of donors	47	5	1.88	0.05714	Gallus_gallus_newGene_24723：LOC106899679，24723：up|gene11287：ACADSB，11287：up|gene16979：LOC417013，16979：down|gene24910：TECR，24910：up|gene4993：DECR1，4993：down
Biological Process	GO:0044802	single-organism membrane organization	186	4	7.84	0.05715	gene13174：ADIPOQ，13174：down|gene19390：MFN2，19390：up|gene2823：PAK1，2823：down|gene3532：INSIG1，3532：up
Biological Process	GO:0002483	antigen processing and presentation of endogenous peptide antigen	4	0	0.17	0.05718	--
Biological Process	GO:0019883	antigen processing and presentation of endogenous antigen	4	0	0.17	0.05718	--
Biological Process	GO:0019885	antigen processing and presentation of endogenous peptide antigen via MHC class I	4	0	0.17	0.05718	--
Biological Process	GO:0021692	cerebellar Purkinje cell layer morphogenesis	11	0	0.46	0.05724	--
Biological Process	GO:0060997	dendritic spine morphogenesis	7	1	0.3	0.05748	gene19414：EPHB2，19414：down
Biological Process	GO:0006533	aspartate catabolic process	3	1	0.13	0.0576	gene6684：DDO，6684：up
Biological Process	GO:0006221	pyrimidine nucleotide biosynthetic process	25	1	1.05	0.05764	gene16416：NME3，16416：up
Biological Process	GO:1903392	negative regulation of adherens junction organization	5	1	0.21	0.05772	gene13305：APOD，13305：up
Biological Process	GO:0009896	positive regulation of catabolic process	90	3	3.8	0.05775	gene13829：FBXO22，13829：up|gene15528：ADRA1B，15528：down|gene20951：TFEB，20951：up
Molecular Function	GO:0008395	steroid hydroxylase activity	2	0	0.08	0.05792	--
Biological Process	GO:2000304	positive regulation of ceramide biosynthetic process	3	0	0.13	0.05805	--
Biological Process	GO:0090154	positive regulation of sphingolipid biosynthetic process	3	0	0.13	0.05805	--
Biological Process	GO:0061024	membrane organization	205	8	8.64	0.05857	gene11474：GULP1，11474：down|gene13174：ADIPOQ，13174：down|gene186|gene19390：MFN2，19390：up|gene2823：PAK1，2823：down|gene3070：CD36，3070：down|gene3532：INSIG1，3532：up|gene9515：TSG101，9515：up：TSG101，9515：up
Biological Process	GO:0097201	negative regulation of transcription from RNA polymerase II promoter in response to stress	4	0	0.17	0.05879	--
Biological Process	GO:0001558	regulation of cell growth	120	11	5.06	0.05882	gene11277：HTRA1，11277：down|gene11985：EAF2，1985：up|gene13225：SERPINE2，13225：down|gene14973：SEMA3F，14973：down|gene15491：SLIT3，15491：down|gene4171：IGFBP3，4171：up|gene5849：TTL，gene5849：up|gene7663：FHL1，7663：down|gene8826：HTRA3，8826：down|gene9515：TSG101，9515：up：TSG101，9515：up|gene954：MTPN，954：down
Biological Process	GO:0043029	T cell homeostasis	12	1	0.51	0.05899	gene11190：GPAM，11190：down
Molecular Function	GO:0020037	heme binding	94	2	3.76	0.05922	gene2885：HBBA，2885：down|gene679：HEBP1，679：down
Molecular Function	GO:0051380	norepinephrine binding	2	0	0.08	0.05924	--
Cellular Component	GO:0043601	nuclear replisome	4	0	0.16	0.0593	--
Cellular Component	GO:0030894	replisome	4	0	0.16	0.0593	--
Cellular Component	GO:0000164	protein phosphatase type 1 complex	2	0	0.08	0.05936	--
Cellular Component	GO:0001917	photoreceptor inner segment	7	1	0.27	0.05946	gene25858：ENO3，25858：up
Biological Process	GO:0043631	RNA polyadenylation	15	0	0.63	0.05949	--
Biological Process	GO:0006378	mRNA polyadenylation	15	0	0.63	0.05949	--
Biological Process	GO:0021892	cerebral cortex GABAergic interneuron differentiation	7	1	0.3	0.0595	gene1950：ARX，1950：down
Biological Process	GO:0009135	purine nucleoside diphosphate metabolic process	2	1	0.08	0.0595	gene25346：NUDT18，25346：up
Biological Process	GO:0009137	purine nucleoside diphosphate catabolic process	2	1	0.08	0.0595	gene25346：NUDT18，25346：up
Cellular Component	GO:0044432	endoplasmic reticulum part	248	6	9.73	0.05953	Gallus_gallus_newGene_24723：LOC106899679，24723：up|gene14452：AMFR，14452：up|gene14698：JPH3，14698：up|gene14699：JPH3，14699：up|gene3532：INSIG1，3532：up|gene6063：PIGF，6063：up
Molecular Function	GO:0008499	UDP-galactose:beta-N-acetylglucosamine beta-1,3-galactosyltransferase activity	6	0	0.24	0.05953	--
Molecular Function	GO:0003688	DNA replication origin binding	3	0	0.12	0.05955	--
Molecular Function	GO:0004252	serine-type endopeptidase activity	85	4	3.4	0.05965	gene11277：HTRA1，11277：down|ggene11856：FAP，11856：down|gene14238：FURIN，14238：up|gene8826：HTRA3，8826：down
Molecular Function	GO:0051117	ATPase binding	12	0	0.48	0.05972	--
Biological Process	GO:0043162	ubiquitin-dependent protein catabolic process via the multivesicular body sorting pathway	5	2	0.21	0.05998	gene8590：VPS37A，8590：up|gene9515：TSG101，9515：up：TSG101，9515：up
Cellular Component	GO:0031966	mitochondrial membrane	230	9	9.02	0.06009	Gallus_gallus_newGene_6113：ND5，6113：up|gene11190：GPAM，11190：down|gene19390：MFN2，19390：up|gene23265：CKMT2，23265：up|gene2469：SLC25A30，2469：up|gene3742：PDK4，3742：down|gene5351：ABCB8，5351：down|gene6345：-，6345：up|gene8905：MIC60，8905：up
Molecular Function	GO:0017171	serine hydrolase activity	104	5	4.16	0.06039	gene11277：HTRA1，11277：down|ggene11856：FAP，11856：down|gene13478：NCEH1，13478：up|gene14238：FURIN，14238：up|gene8826：HTRA3，8826：down
Biological Process	GO:0045651	positive regulation of macrophage differentiation	8	0	0.34	0.06056	--
Biological Process	GO:0055085	transmembrane transport	387	22	16.32	0.06058	Gallus_gallus_newGene_24651：LOC102114762，24651：up|Gallus_gallus_newGene_6113：ND5，6113：up|gene10757：SLC16A9，10757：up|gene11768：GPR155，11768：up|gene14073：SV2B，14073：up|gene14698：JPH3，14698：up|gene14699：JPH3，14699：up|gene14701：SLC7A5，14701：up|gene17903：KCNJ2，17903：down|gene18377：SLC47A2，18377：down|gene186|gene19185：KCNAB2，19185：down|gene20230：SLC37A4，20230：up|gene208|gene3070：CD36，3070：down|gene5351…
Molecular Function	GO:0016882	cyclo-ligase activity	4	1	0.16	0.06059	gene1749：GART，1749：up
Molecular Function	GO:0008194	UDP-glycosyltransferase activity	57	3	2.28	0.06067	Gallus_gallus_newGene_23546：GYS1，23546：up|gene25911：GYS1，25911：up|gene26487：GYS1，26487：up
Cellular Component	GO:0031301	integral component of organelle membrane	111	4	4.35	0.06082	Gallus_gallus_newGene_24723：LOC106899679，24723：up|gene14077：SIAT8B，14077：down|gene14452：AMFR，14452：up|gene3532：INSIG1，3532：up
Biological Process	GO:0051336	regulation of hydrolase activity	347	15	14.63	0.06085	gene10010：EGLN3，10010：up|gene10332：PPP1R36，10332：down|gene12279：RGS2，12279：down|gene13225：SERPINE2，13225：down|gene13306：PPP1R2，13306：up|gene14852：TNNC1，14852：up|gene17721：TBCD，17721：up|gene22541：TPM2，22541：down|gene24320：NR4A1，24320：up|gene25762：PPP1R37，25762：up|gene6500：ARFGEF3，6500：down|gene8406：EPHA5，8406：down|gene9599：HRAS，9599：down|gene9602：HRAS，9602：down |gene9871：ZFYVE1，9871：up
Cellular Component	GO:0030056	hemidesmosome	4	0	0.16	0.06085	--
Biological Process	GO:0032609	interferon-gamma production	27	1	1.14	0.06086	gene20242：IL18，20242：down
Biological Process	GO:0055098	response to low-density lipoprotein particle stimulus	3	2	0.13	0.06089	gene186|gene3070：CD36，3070：down
Biological Process	GO:0006814	sodium ion transport	54	4	2.28	0.06089	Gallus_gallus_newGene_24651：LOC102114762，24651：up|gene13225：SERPINE2，13225：down|gene373|gene402：SLC38A2，402：down
Biological Process	GO:0042048	olfactory behavior	4	1	0.17	0.0609	gene11805：UBR3，11805：up
Biological Process	GO:0007635	chemosensory behavior	4	1	0.17	0.0609	gene11805：UBR3，11805：up
Biological Process	GO:0006390	transcription from mitochondrial promoter	2	0	0.08	0.0611	--
Biological Process	GO:1901620	regulation of smoothened signaling pathway involved in dorsal/ventral neural tube patterning	2	0	0.08	0.06115	--
Biological Process	GO:1901621	negative regulation of smoothened signaling pathway involved in dorsal/ventral neural tube patterning	2	0	0.08	0.06115	--
Molecular Function	GO:0003995	acyl-CoA dehydrogenase activity	19	2	0.76	0.06135	gene11287：ACADSB，11287：up|gene16979：LOC417013，16979：down
Biological Process	GO:0060907	positive regulation of macrophage cytokine production	7	2	0.3	0.06141	gene186|gene3070：CD36，3070：down
Molecular Function	GO:0070566	adenylyltransferase activity	8	0	0.32	0.06161	--
Biological Process	GO:0046166	glyceraldehyde-3-phosphate biosynthetic process	3	1	0.13	0.06171	Gallus_gallus_newGene_20049：TPI1，20049：up
Molecular Function	GO:0034458	3'-5' RNA helicase activity	2	0	0.08	0.06186	--
Molecular Function	GO:0019202	amino acid kinase activity	2	0	0.08	0.06195	--
Molecular Function	GO:0004350	glutamate-5-semialdehyde dehydrogenase activity	2	0	0.08	0.06195	--
Molecular Function	GO:0004349	glutamate 5-kinase activity	2	0	0.08	0.06195	--
Molecular Function	GO:0016165	linoleate 13S-lipoxygenase activity	2	0	0.08	0.06212	--
Molecular Function	GO:0004051	arachidonate 5-lipoxygenase activity	2	0	0.08	0.06212	--
Biological Process	GO:0050000	chromosome localization	17	1	0.72	0.06221	gene16249：NDE1，16249：up
Cellular Component	GO:0045025	mitochondrial degradosome	2	0	0.08	0.06225	--
Biological Process	GO:0071526	semaphorin-plexin signaling pathway	7	0	0.3	0.06235	--
Cellular Component	GO:0044279	other organism membrane	2	0	0.08	0.06276	--
Cellular Component	GO:0044221	host cell synapse	2	0	0.08	0.06276	--
Cellular Component	GO:0044218	other organism cell membrane	2	0	0.08	0.06276	--
Cellular Component	GO:0044231	host cell presynaptic membrane	2	0	0.08	0.06276	--
Cellular Component	GO:0033644	host cell membrane	2	0	0.08	0.06276	--
Cellular Component	GO:0072556	other organism presynaptic membrane	2	0	0.08	0.06276	--
Biological Process	GO:0070228	regulation of lymphocyte apoptotic process	16	1	0.67	0.06297	gene11190：GPAM，11190：down
Cellular Component	GO:0030425	dendrite	82	4	3.22	0.06331	gene1281：KPNA1，1281：up|gene19414：EPHB2，19414：down|gene8406：EPHA5，8406：down|gene8806：DPYSL2，8806：down
Biological Process	GO:0035306	positive regulation of dephosphorylation	4	0	0.17	0.06363	--
Biological Process	GO:0035307	positive regulation of protein dephosphorylation	4	0	0.17	0.06363	--
Biological Process	GO:0048536	spleen development	25	1	1.05	0.06363	gene8492：PITX2，8492：down
Biological Process	GO:0000070	mitotic sister chromatid segregation	38	2	1.6	0.06386	gene16853：KLHL22，16853：up|gene16919：CIT，16919：down
Molecular Function	GO:0016758	transferase activity, transferring hexosyl groups	109	6	4.36	0.06387	Gallus_gallus_newGene_23546：GYS1，23546：up|Gallus_gallus_newGene_25030：PYGM，25030：up|gene25608：PYGM，25608：up|gene25871：PYGM，25871：up|gene25911：GYS1，25911：up|gene26487：GYS1，26487：up
Biological Process	GO:0032321	positive regulation of GTPase activity	28	2	1.18	0.06401	gene9599：HRAS，9599：down|gene9602：HRAS，9602：down
Biological Process	GO:0048255	mRNA stabilization	12	0	0.51	0.06443	--
Biological Process	GO:0043489	RNA stabilization	12	0	0.51	0.06443	--
Biological Process	GO:0033014	tetrapyrrole biosynthetic process	14	0	0.59	0.06444	--
Molecular Function	GO:0030412	formimidoyltetrahydrofolate cyclodeaminase activity	2	0	0.08	0.06457	--
Molecular Function	GO:0030407	formimidoyltransferase activity	2	0	0.08	0.06457	--
Molecular Function	GO:0030409	glutamate formimidoyltransferase activity	2	0	0.08	0.06457	--
Biological Process	GO:0090305	nucleic acid phosphodiester bond hydrolysis	56	1	2.36	0.06478	gene7037：DDX1，7037：up
Cellular Component	GO:0030904	retromer complex	6	0	0.24	0.06482	--
Biological Process	GO:0071026	cytoplasmic RNA surveillance	2	0	0.08	0.0649	--
Biological Process	GO:0070827	chromatin maintenance	2	0	0.08	0.0649	--
Biological Process	GO:0035945	mitochondrial ncRNA surveillance	2	0	0.08	0.0649	--
Biological Process	GO:0035946	mitochondrial mRNA surveillance	2	0	0.08	0.0649	--
Biological Process	GO:2000827	mitochondrial RNA surveillance	2	0	0.08	0.0649	--
Biological Process	GO:0000962	positive regulation of mitochondrial RNA catabolic process	2	0	0.08	0.0649	--
Biological Process	GO:0000965	mitochondrial RNA 3'-end processing	2	0	0.08	0.0649	--
Biological Process	GO:0000958	mitochondrial mRNA catabolic process	2	0	0.08	0.0649	--
Biological Process	GO:0032816	positive regulation of natural killer cell activation	8	2	0.34	0.06492	gene20242：IL18，20242：down|gene8061：IL15，8061：down
Biological Process	GO:0046364	monosaccharide biosynthetic process	48	9	2.02	0.06503	Gallus_gallus_newGene_20049：TPI1，20049：up|gene11094：PGAM1，11094：up|gene1312：TPI1，1312：up|gene13174：ADIPOQ，13174：down|gene14592：GPI，14592：up|gene21200：PDK2，21200：down|gene24885：PDK2，24885：down|gene25858：ENO3，25858：up|gene7816：PGK，7816：up
Biological Process	GO:0034220	ion transmembrane transport	214	12	9.02	0.06503	Gallus_gallus_newGene_24651：LOC102114762，24651：up|Gallus_gallus_newGene_6113：ND5，6113：up|gene14698：JPH3，14698：up|gene14699：JPH3，14699：up|gene14701：SLC7A5，14701：up|gene17903：KCNJ2，17903：down|gene186|gene19185：KCNAB2，19185：down|gene3070：CD36，3070：down|gene6269：KCNK1，6269：up|gene6874：KCNQ5，6874：up|gene7663：FHL1，7663：down
Molecular Function	GO:0046906	tetrapyrrole binding	100	2	4	0.06508	gene2885：HBBA，2885：down|gene679：HEBP1，679：down
Biological Process	GO:0042326	negative regulation of phosphorylation	131	4	5.52	0.06529	gene12279：RGS2，12279：down|gene13174：ADIPOQ，13174：down|gene14094：NR2F2，14094：down|gene19194：TP73，19194：up
Biological Process	GO:0006910	phagocytosis, recognition	6	3	0.25	0.06533	gene17754：JMJD6，17754：up|gene186|gene3070：CD36，3070：down
Biological Process	GO:0050812	regulation of acyl-CoA biosynthetic process	6	3	0.25	0.06536	gene21200：PDK2，21200：down|gene24885：PDK2，24885：down|gene3742：PDK4，3742：down
Biological Process	GO:0051193	regulation of cofactor metabolic process	6	3	0.25	0.06536	gene21200：PDK2，21200：down|gene24885：PDK2，24885：down|gene3742：PDK4，3742：down
Biological Process	GO:0051196	regulation of coenzyme metabolic process	6	3	0.25	0.06536	gene21200：PDK2，21200：down|gene24885：PDK2，24885：down|gene3742：PDK4，3742：down
Molecular Function	GO:0016791	phosphatase activity	165	11	6.6	0.06538	gene11094：PGAM1，11094：up|gene16202：PGP，16202：up|gene19548：DUSP26，19548：down|gene23004：FBP2，23004：up|gene4634：IMPA2，4634：up|gene6074：PLB1，6074：down|gene6898：PTP4A1，6898：up|gene7147：EPHX2，7147：down|gene7201：MTMR9，7201：up|gene8588：MTMR7，8588：up|gene9557：-，9557：up
Biological Process	GO:0034329	cell junction assembly	47	5	1.98	0.0654	gene13305：APOD，13305：up|gene19557：ZNF703，19557：down|gene20872：RHOC，20872：down|gene21172：ITGB3，21172：down|gene21407：CNTNAP1，21407：down
Biological Process	GO:0048706	embryonic skeletal system development	85	7	3.58	0.0655	gene10245：DLK1，10245：down|gene12338：PMX1，12338：down|gene1374：TBX15，1374：down|gene22090：HOXC6，22090：up：HOXC6，22090：up|gene3864：，HOXA73864：up|gene3865：HOXA5，3865：up|gene3866：HOXA6，3866：up
Biological Process	GO:0051650	establishment of vesicle localization	58	2	2.45	0.06573	gene16249：NDE1，16249：up|gene4120：AMPH，4120：up
Biological Process	GO:0070525	tRNA threonylcarbamoyladenosine metabolic process	2	1	0.08	0.0658	gene6871：MTO1，6871：up
Biological Process	GO:0010959	regulation of metal ion transport	79	5	3.33	0.06605	gene13225：SERPINE2，13225：down|gene14698：JPH3，14698：up|gene14699：JPH3，14699：up|gene373|gene7663：FHL1，7663：down
Biological Process	GO:0019254	carnitine metabolic process, CoA-linked	2	0	0.08	0.06651	--
Molecular Function	GO:0008236	serine-type peptidase activity	103	4	4.12	0.06665	gene11277：HTRA1，11277：down|ggene11856：FAP，11856：down|gene14238：FURIN，14238：up|gene8826：HTRA3，8826：down
Biological Process	GO:0090505	epiboly involved in wound healing	7	0	0.3	0.06725	--
Biological Process	GO:0044319	wound healing, spreading of cells	7	0	0.3	0.06725	--
Cellular Component	GO:1903293	phosphatase complex	23	1	0.9	0.0673	gene6074：PLB1，6074：down
Cellular Component	GO:0008287	protein serine/threonine phosphatase complex	23	1	0.9	0.0673	gene6074：PLB1，6074：down
Biological Process	GO:2000251	positive regulation of actin cytoskeleton reorganization	6	2	0.25	0.06733	gene9599：HRAS，9599：down|gene9602：HRAS，9602：down
Molecular Function	GO:0004060	arylamine N-acetyltransferase activity	4	0	0.16	0.06763	--
Molecular Function	GO:0031420	alkali metal ion binding	7	1	0.28	0.06782	gene1374：TBX15，1374：down|gene13746：PKM，13746：up
Biological Process	GO:0009416	response to light stimulus	105	5	4.43	0.06783	gene12303：CRIP1，12303：down|gene15528：ADRA1B，15528：down|gene24189：OPN1LW，24189：down|gene9599：HRAS，9599：down|gene9602：HRAS，9602：down
Molecular Function	GO:0071949	FAD binding	4	0	0.16	0.06824	--
Molecular Function	GO:0004867	serine-type endopeptidase inhibitor activity	40	2	1.6	0.0683	gene13225：SERPINE2，13225：down|gene14238：FURIN，14238：up
Biological Process	GO:0042255	ribosome assembly	8	0	0.34	0.0687	--
Molecular Function	GO:0042379	chemokine receptor binding	23	1	0.92	0.06877	gene10986：CXCL12，10986：down
Biological Process	GO:0060482	lobar bronchus development	2	1	0.08	0.06878	gene3865：HOXA5，3865：up
Biological Process	GO:0060534	trachea cartilage development	2	1	0.08	0.06878	gene3865：HOXA5，3865：up
Biological Process	GO:0060535	trachea cartilage morphogenesis	2	1	0.08	0.06878	gene3865：HOXA5，3865：up
Biological Process	GO:0071219	cellular response to molecule of bacterial origin	43	3	1.81	0.06881	gene186|gene20242：IL18，20242：down|gene3070：CD36，3070：down
Biological Process	GO:0060969	negative regulation of gene silencing	3	0	0.13	0.06901	--
Biological Process	GO:0021885	forebrain cell migration	24	2	1.01	0.06901	gene11236：EMX2，11236：down|gene1950：ARX，1950：down
Biological Process	GO:0009250	glucan biosynthetic process	23	4	0.97	0.06903	Gallus_gallus_newGene_23546：GYS1，23546：up|gene11915：PRKAG3，11915：up|gene25911：GYS1，25911：up|gene26487：GYS1，26487：up
Biological Process	GO:0005978	glycogen biosynthetic process	23	4	0.97	0.06903	Gallus_gallus_newGene_23546：GYS1，23546：up|gene11915：PRKAG3，11915：up|gene25911：GYS1，25911：up|gene26487：GYS1，26487：up
Biological Process	GO:0007528	neuromuscular junction development	20	1	0.84	0.06915	gene2823：PAK1，2823：down
Cellular Component	GO:0032432	actin filament bundle	16	2	0.63	0.06917	gene19848：FHL3，19848：down|gene22541：TPM2，22541：down
Biological Process	GO:0033013	tetrapyrrole metabolic process	21	0	0.89	0.06937	--
Biological Process	GO:0046036	CTP metabolic process	18	1	0.76	0.06949	gene16416：NME3，16416：up
Biological Process	GO:0009208	pyrimidine ribonucleoside triphosphate metabolic process	18	1	0.76	0.06949	gene16416：NME3，16416：up
Biological Process	GO:0009209	pyrimidine ribonucleoside triphosphate biosynthetic process	18	1	0.76	0.06949	gene16416：NME3，16416：up
Biological Process	GO:0006241	CTP biosynthetic process	18	1	0.76	0.06949	gene16416：NME3，16416：up
Molecular Function	GO:0008235	metalloexopeptidase activity	22	4	0.88	0.06953	gene14069：AGBL1，14069：down|gene18972：NPEPL1，18972：up|gene26239：AEBP1，26239：down|gene453：CPM，453：down
Biological Process	GO:0071359	cellular response to dsRNA	13	0	0.55	0.06959	--
Molecular Function	GO:0016706	oxidoreductase activity, acting on paired donors, with incorporation or reduction of molecular oxygen, 2-oxoglutarate as one donor, and incorporation of one atom each of oxygen into both donors	24	3	0.96	0.0697	gene10010：EGLN3，10010：up|gene16135：ALKBH5，gene16135：up|gene17754：JMJD6，17754：up
Molecular Function	GO:0005536	glucose binding	5	0	0.2	0.06983	--
Molecular Function	GO:0044548	S100 protein binding	6	0	0.24	0.07006	--
Biological Process	GO:0060700	regulation of ribonuclease activity	3	0	0.13	0.07011	--
Biological Process	GO:0060699	regulation of endoribonuclease activity	3	0	0.13	0.07011	--
Molecular Function	GO:0004908	interleukin-1 receptor activity	8	0	0.32	0.07012	--
Biological Process	GO:0002087	regulation of respiratory gaseous exchange by neurological system process	3	0	0.13	0.07018	--
Biological Process	GO:0036005	response to macrophage colony-stimulating factor	5	0	0.21	0.07024	--
Biological Process	GO:0036006	cellular response to macrophage colony-stimulating factor stimulus	5	0	0.21	0.07024	--
Molecular Function	GO:0008139	nuclear localization sequence binding	4	0	0.16	0.07038	--
Molecular Function	GO:0016779	nucleotidyltransferase activity	145	6	5.8	0.07046	Gallus_gallus_newGene_18494：LOC109365375，18494：up|Gallus_gallus_newGene_2075：AS27_14818，2075：up|Gallus_gallus_newGene_21552：N339_04974，21552：up|Gallus_gallus_newGene_47：LOC110391435，47：up|gene1396：POLQ，1396：up|gene5739：UGP2，5739：up
Cellular Component	GO:0008541	proteasome regulatory particle, lid subcomplex	2	0	0.08	0.07057	--
Biological Process	GO:0043691	reverse cholesterol transport	6	0	0.25	0.07063	--
Biological Process	GO:0055091	phospholipid homeostasis	6	1	0.25	0.07063	gene11190：GPAM，11190：down
Biological Process	GO:0090161	Golgi ribbon formation	3	0	0.13	0.0707	--
Biological Process	GO:0007612	learning	49	7	2.07	0.07071	gene14698：JPH3，14698：up|gene14699：JPH3，14699：up|gene15528：ADRA1B，15528：down|gene19414：EPHB2，19414：down|gene4120：AMPH，4120：up|gene9599：HRAS，9599：down|gene9602：HRAS，9602：down
Biological Process	GO:1902807	negative regulation of cell cycle G1/S phase transition	17	2	0.72	0.07086	gene14694：FBXO31，14694：up|gene7663：FHL1，7663：down
Biological Process	GO:2000134	negative regulation of G1/S transition of mitotic cell cycle	17	2	0.72	0.07086	gene14694：FBXO31，14694：up|gene7663：FHL1，7663：down
Cellular Component	GO:0043204	perikaryon	8	2	0.31	0.07107	gene25858：ENO3，25858：up|gene3890：BTD，3890：down
Cellular Component	GO:0031012	extracellular matrix	195	16	7.65	0.07114	Gallus_gallus_newGene_23591：COL3A1，23591：down|gene11074：HPSE2，11074：up|gene11277：HTRA1，11277：down|gene1260：MAGP，1260:down|gene13225：SERPINE2，13225：down|gene14627：CDH8，14627：up|gene14632：ADAMTS18，14632：down|gene14675：CRISPLD2，14675：down|gene14993：OGN，14993：down|gene17961：TIMP2，17961：down|gene20089：ADAMTS15，20089：down|gene23254：VCAN，23254：down|gene26239：AEBP1，26239：down|gene3736：COL1A2，3736：down|ge…
Cellular Component	GO:0019028	viral capsid	2	0	0.08	0.07114	--
Cellular Component	GO:0044423	virion part	2	0	0.08	0.07114	--
Biological Process	GO:0006695	cholesterol biosynthetic process	16	1	0.67	0.07123	gene3532：INSIG1，3532：up
Biological Process	GO:0044275	cellular carbohydrate catabolic process	14	3	0.59	0.07124	Gallus_gallus_newGene_20049：TPI1，20049：up|Gallus_gallus_newGene_25030：PYGM，25030：up|gene15528：ADRA1B，15528：down
Cellular Component	GO:0030123	AP-3 adaptor complex	7	0	0.27	0.07126	--
Biological Process	GO:0002827	positive regulation of T-helper 1 type immune response	3	0	0.13	0.07136	--
Biological Process	GO:0032693	negative regulation of interleukin-10 production	3	0	0.13	0.07136	--
Biological Process	GO:0032612	interleukin-1 production	16	0	0.67	0.07139	--
Biological Process	GO:1901016	regulation of potassium ion transmembrane transporter activity	9	1	0.38	0.07139	gene7663：FHL1，7663：down
Molecular Function	GO:0008375	acetylglucosaminyltransferase activity	24	0	0.96	0.07187	--
Molecular Function	GO:0050997	quaternary ammonium group binding	13	0	0.52	0.07203	--
Biological Process	GO:0003278	apoptotic process involved in heart morphogenesis	3	0	0.13	0.07222	--
Biological Process	GO:0021893	cerebral cortex GABAergic interneuron fate commitment	2	0	0.08	0.07263	--
Biological Process	GO:0021882	regulation of transcription from RNA polymerase II promoter involved in forebrain neuron fate commitment	2	0	0.08	0.07263	--
Biological Process	GO:0008286	insulin receptor signaling pathway	39	5	1.64	0.07272	gene17966：SOCS3，17966：down|gene21200：PDK2，21200：down|gene24885：PDK2，24885：down|gene3742：PDK4，3742：down|gene6062：RHOQ，6062：up
Biological Process	GO:0071222	cellular response to lipopolysaccharide	39	3	1.64	0.07272	gene186|gene20242：IL18，20242：down|gene3070：CD36，3070：down
Molecular Function	GO:0031543	peptidyl-proline dioxygenase activity	5	1	0.2	0.07272	gene10010：EGLN3，10010：up
Biological Process	GO:0032024	positive regulation of insulin secretion	12	1	0.51	0.07278	gene23869：PFKM，23869：up
Biological Process	GO:0048667	cell morphogenesis involved in neuron differentiation	184	14	7.76	0.07282	gene10986：CXCL12，10986：down|gene12741：FOXD2，12741：down|gene13603：CLRN1，13603：up|gene14973：SEMA3F，14973：down|gene15491：SLIT3，15491：down|gene16919：CIT，16919：down|gene19414：EPHB2，19414：down|gene1950：ARX，1950：down|gene25417：ALDOA，25417：up|gene3533：EN2，3533：down|gene5570：EN2，5570：down|gene5849：TTL，gene5849：up|gene8406：EPHA5，8406：down|gene8507：UNC5C，8507：down
Cellular Component	GO:0031264	death-inducing signaling complex	6	0	0.24	0.07294	--
Biological Process	GO:0001754	eye photoreceptor cell differentiation	27	0	1.14	0.07308	--
Cellular Component	GO:0043025	neuronal cell body	69	6	2.71	0.07312	gene19414：EPHB2，19414：down|gene25858：ENO3，25858：up|gene3890：BTD，3890：down|gene4218：NRSN1，4218：up|gene7634：FRMD7，7634：up|gene8806：DPYSL2，8806：down
Molecular Function	GO:0030676	Rac guanyl-nucleotide exchange factor activity	6	1	0.24	0.07341	gene13065：ARHGEF4，13065：up
Biological Process	GO:0021895	cerebral cortex neuron differentiation	10	2	0.42	0.07344	gene1950：ARX，1950：down|gene2920：GDPD5，2920：down
Biological Process	GO:0009968	negative regulation of signal transduction	361	22	15.22	0.0742	gene10245：DLK1，10245：down|gene1084：LDHB，1084：down0|gene11277：HTRA1，11277：down|gene12279：RGS2，12279：down|gene13174：ADIPOQ，13174：down|gene13225：SERPINE2，13225：down|gene13305：APOD，13305：up|gene15491：SLIT3，15491：down|gene15682：G3BP1，15682：up|gene16746：MAPKAPK5，16746：up|gene17809：NOTUM，17809：up|gene17966：SOCS3，17966：down|gene19194：TP73，19194：up|gene19344：NBL1，19344：down|gene19390：MFN2，19390：up|gene229…
Biological Process	GO:0060491	regulation of cell projection assembly	37	5	1.56	0.07441	gene13603：CLRN1，13603：up|gene17915：CDC42EP4，17915：down|gene6062：RHOQ，6062：up|gene9599：HRAS，9599：down|gene9602：HRAS，9602：down
Molecular Function	GO:0031545	peptidyl-proline 4-dioxygenase activity	3	1	0.12	0.07442	gene10010：EGLN3，10010：up
Cellular Component	GO:0032937	SREBP-SCAP-Insig complex	2	1	0.08	0.07449	gene3532：INSIG1，3532：up
Biological Process	GO:0090083	regulation of inclusion body assembly	2	0	0.08	0.07451	--
Biological Process	GO:0090084	negative regulation of inclusion body assembly	2	0	0.08	0.07451	--
Molecular Function	GO:0005105	type 1 fibroblast growth factor receptor binding	2	0	0.08	0.07458	--
Biological Process	GO:0060099	regulation of phagocytosis, engulfment	3	2	0.13	0.07474	gene186|gene3070：CD36，3070：down
Biological Process	GO:0060100	positive regulation of phagocytosis, engulfment	3	2	0.13	0.07474	gene186|gene3070：CD36，3070：down
Biological Process	GO:0009312	oligosaccharide biosynthetic process	7	0	0.3	0.07477	--
Biological Process	GO:0048073	regulation of eye pigmentation	2	0	0.08	0.0749	--
Biological Process	GO:0005976	polysaccharide metabolic process	52	9	2.19	0.07551	Gallus_gallus_newGene_21069：PHKB，21069：up|Gallus_gallus_newGene_23546：GYS1，23546：up|Gallus_gallus_newGene_25030：PYGM，25030：up|gene11915：PRKAG3，11915：up|gene14526：PHKB，14526：up|gene15528：ADRA1B，15528：down|gene25911：GYS1，25911：up|gene26487：GYS1，26487：up|gene6074：PLB1，6074：down
Biological Process	GO:0014912	negative regulation of smooth muscle cell migration	2	1	0.08	0.07591	gene13174：ADIPOQ，13174：down
Molecular Function	GO:0004740	pyruvate dehydrogenase (acetyl-transferring) kinase activity	4	2	0.16	0.07599	gene21200：PDK2，21200：down|gene24885：PDK2，24885：down
Biological Process	GO:0045217	cell-cell junction maintenance	3	0	0.13	0.07603	--
Biological Process	GO:0034331	cell junction maintenance	3	0	0.13	0.07603	--
Biological Process	GO:0051047	positive regulation of secretion	85	1	3.58	0.07607	gene23869：PFKM，23869：up
Biological Process	GO:0071168	protein localization to chromatin	7	0	0.3	0.07608	--
Biological Process	GO:0046835	carbohydrate phosphorylation	9	0	0.38	0.07622	--
Biological Process	GO:0006801	superoxide metabolic process	23	2	0.97	0.07632	gene186|gene3070：CD36，3070：down
Biological Process	GO:0007618	mating	14	2	0.59	0.07633	gene13225：SERPINE2，13225：down|gene6684：DDO，6684：up
Molecular Function	GO:0003860	3-hydroxyisobutyryl-CoA hydrolase activity	2	0	0.08	0.07656	--
Molecular Function	GO:0030429	kynureninase activity	2	0	0.08	0.07662	--
Cellular Component	GO:0031225	anchored component of membrane	39	4	1.53	0.07669	gene19539：GFRA2，19539：down|gene22491：CNTFR，22491：up|gene373|gene4324：NRN1，4324：down
Molecular Function	GO:0019855	calcium channel inhibitor activity	6	0	0.24	0.07702	--
Cellular Component	GO:0030690	Noc1p-Noc2p complex	2	0	0.08	0.07713	--
Cellular Component	GO:0030689	Noc complex	2	0	0.08	0.07713	--
Biological Process	GO:0046049	UMP metabolic process	8	0	0.34	0.07714	--
Biological Process	GO:0009173	pyrimidine ribonucleoside monophosphate metabolic process	8	0	0.34	0.07714	--
Biological Process	GO:0009174	pyrimidine ribonucleoside monophosphate biosynthetic process	8	0	0.34	0.07714	--
Biological Process	GO:0009130	pyrimidine nucleoside monophosphate biosynthetic process	8	0	0.34	0.07714	--
Biological Process	GO:0006222	UMP biosynthetic process	8	0	0.34	0.07714	--
Molecular Function	GO:0008762	UDP-N-acetylmuramate dehydrogenase activity	7	1	0.28	0.07737	gene11645：AOX1，11645：up
Biological Process	GO:0033363	secretory granule organization	7	1	0.3	0.0774	gene13225：SERPINE2，13225：down
Biological Process	GO:0090559	regulation of membrane permeability	11	0	0.46	0.07752	--
Biological Process	GO:0051346	negative regulation of hydrolase activity	112	9	4.72	0.07759	gene10332：PPP1R36，10332：down|gene12279：RGS2，12279：down|gene13225：SERPINE2，13225：down|gene24320：NR4A1，24320：up|gene25762：PPP1R37，25762：up|gene6500：ARFGEF3，6500：down|gene9599：HRAS，9599：down|gene9602：HRAS，9602：down |gene9871：ZFYVE1，9871：up
Cellular Component	GO:0035867	alphav-beta3 integrin-IGF-1-IGF1R complex	2	0	0.08	0.07763	--
Biological Process	GO:0050805	negative regulation of synaptic transmission	13	1	0.55	0.07765	gene13174：ADIPOQ，13174：down
Biological Process	GO:0051875	pigment granule localization	12	0	0.51	0.07783	--
Biological Process	GO:0032400	melanosome localization	12	0	0.51	0.07783	--
Biological Process	GO:0016601	Rac protein signal transduction	25	4	1.05	0.07794	gene6283：RHOU，6283：up|gene8406：EPHA5，8406：down|gene9599：HRAS，9599：down|gene9602：HRAS，9602：down
Molecular Function	GO:0034061	DNA polymerase activity	85	5	3.4	0.078	Gallus_gallus_newGene_18494：LOC109365375，18494：up|Gallus_gallus_newGene_2075：AS27_14818，2075：up|Gallus_gallus_newGene_21552：N339_04974，21552：up|Gallus_gallus_newGene_47：LOC110391435，47：up|gene1396：POLQ，1396：up
Biological Process	GO:0010875	positive regulation of cholesterol efflux	7	1	0.3	0.07812	gene13174：ADIPOQ，13174：down
Biological Process	GO:0043547	positive regulation of GTPase activity	99	4	4.17	0.07819	gene12279：RGS2，12279：down|gene17721：TBCD，17721：up|gene9599：HRAS，9599：down|gene9602：HRAS，9602：down
Biological Process	GO:0009111	vitamin catabolic process	2	0	0.08	0.07821	--
Biological Process	GO:0042363	fat-soluble vitamin catabolic process	2	0	0.08	0.07821	--
Molecular Function	GO:0044212	transcription regulatory region DNA binding	211	10	8.44	0.07825	gene11236：EMX2，11236：down|gene11500：ERBB4，11500：up|gene1374：TBX15，1374：down|gene17515：RXRA，17515：up|gene19194：TP73，19194：up|gene20078：BARX2，20078：down|gene3533：EN2，3533：down|gene4085：TBX20，4085：down|gene5570：EN2，5570：down|gene8492：PITX2，8492：down
Biological Process	GO:0007288	sperm axoneme assembly	3	0	0.13	0.07828	--
Biological Process	GO:0035082	axoneme assembly	3	0	0.13	0.07828	--
Molecular Function	GO:0051019	mitogen-activated protein kinase binding	4	1	0.16	0.07832	gene16746：MAPKAPK5，16746：up
Biological Process	GO:0045721	negative regulation of gluconeogenesis	6	1	0.25	0.07845	gene13174：ADIPOQ，13174：down
Biological Process	GO:0070646	protein modification by small protein removal	47	1	1.98	0.0785	gene16120：COPS3，16120：up
Biological Process	GO:0031345	negative regulation of cell projection organization	34	3	1.43	0.07854	gene14973：SEMA3F，14973：down|gene16919：CIT，16919：down|gene19414：EPHB2，19414：down
Biological Process	GO:0018401	peptidyl-proline hydroxylation to 4-hydroxy-L-proline	3	1	0.13	0.07878	gene10010：EGLN3，10010：up
Molecular Function	GO:0048495	Roundabout binding	3	1	0.12	0.07883	gene15491：SLIT3，15491：down
Molecular Function	GO:0070063	RNA polymerase binding	15	0	0.6	0.07884	--
Biological Process	GO:0060730	regulation of intestinal epithelial structure maintenance	3	0	0.13	0.07892	--
Biological Process	GO:0035456	response to interferon-beta	3	0	0.13	0.07899	--
Biological Process	GO:0035458	cellular response to interferon-beta	3	0	0.13	0.07899	--
Cellular Component	GO:0031588	nucleotide-activated protein kinase complex	2	0	0.08	0.07938	--
Cellular Component	GO:0030176	integral component of endoplasmic reticulum membrane	52	3	2.04	0.0796	Gallus_gallus_newGene_24723：LOC106899679，24723：up|gene14452：AMFR，14452：up|gene3532：INSIG1，3532：up
Molecular Function	GO:0004886	9-cis retinoic acid receptor activity	2	1	0.08	0.07962	gene17515：RXRA，17515：up
Biological Process	GO:0019359	nicotinamide nucleotide biosynthetic process	10	1	0.42	0.07966	gene226
Biological Process	GO:0016049	cell growth	153	15	6.45	0.07969	gene11277：HTRA1，11277：down|gene11985：EAF2，1985：up|gene12741：FOXD2，12741：down|gene13225：SERPINE2，13225：down|gene14973：SEMA3F，14973：down|gene15184：ARIH2，15184：up|gene15491：SLIT3，15491：down|gene15528：ADRA1B，15528：down|gene4171：IGFBP3，4171：up|gene5849：TTL，gene5849：up|gene683：EMP1，683：down|gene7663：FHL1，7663：down|gene8826：HTRA3，8826：down|gene9515：TSG101，9515：up：TSG101，9515：up|gene954：MTPN，954：down
Molecular Function	GO:0051920	peroxiredoxin activity	5	0	0.2	0.07997	--
Biological Process	GO:0006672	ceramide metabolic process	36	1	1.52	0.0802	gene14077：SIAT8B，14077：down
Biological Process	GO:0006574	valine catabolic process	2	0	0.08	0.08026	--
Biological Process	GO:0042182	ketone catabolic process	2	0	0.08	0.08032	--
Biological Process	GO:0034516	response to vitamin B6	2	0	0.08	0.08032	--
Biological Process	GO:0097052	L-kynurenine metabolic process	2	0	0.08	0.08032	--
Biological Process	GO:0097053	L-kynurenine catabolic process	2	0	0.08	0.08032	--
Biological Process	GO:1900077	negative regulation of cellular response to insulin stimulus	12	1	0.51	0.08032	gene17966：SOCS3，17966：down
Biological Process	GO:0046627	negative regulation of insulin receptor signaling pathway	12	1	0.51	0.08032	gene17966：SOCS3，17966：down
Biological Process	GO:2001233	regulation of apoptotic signaling pathway	42	0	1.77	0.08033	--
Biological Process	GO:0018193	peptidyl-amino acid modification	358	9	15.1	0.08054	Gallus_gallus_newGene_47：LOC110391435，47：up|gene10010：EGLN3，10010：up|gene11500：ERBB4，11500：up|gene17754：JMJD6，17754：up|gene186|gene19414：EPHB2，19414：down|gene2299：METTL21C，2299：down|gene2823：PAK1，2823：down|gene3070：CD36，3070：down
Biological Process	GO:0009235	cobalamin metabolic process	2	0	0.08	0.08079	--
Biological Process	GO:0044712	single-organism catabolic process	594	48	25.05	0.08083	Gallus_gallus_newGene_20049：TPI1，20049：up|Gallus_gallus_newGene_25030：PYGM，25030：up|Gallus_gallus_newGene_25321：LOC104917114，25321：up|gene1029：BPGM，1029：up|gene1037：RERG，1037：down|gene1067：BCAT1，1067：up|gene1084：LDHB，1084：down|gene10995：ACTA2，10995：down|gene11094：PGAM1，11094：up|gene1206：TIGAR，1206：up|gene12279：RGS2，12279：down|gene1312：TPI1，1312：up|gene13174：ADIPOQ，13174：down|gene1374：TBX15，1374：d…
Biological Process	GO:0035635	entry of bacterium into host cell	2	0	0.08	0.08097	--
Biological Process	GO:2000535	regulation of entry of bacterium into host cell	2	0	0.08	0.08097	--
Biological Process	GO:2000536	negative regulation of entry of bacterium into host cell	2	0	0.08	0.08097	--
Biological Process	GO:0045773	positive regulation of axon extension	9	0	0.38	0.08098	--
Biological Process	GO:0038030	non-canonical Wnt signaling pathway via MAPK cascade	5	0	0.21	0.0813	--
Biological Process	GO:0039020	pronephric nephron tubule development	5	0	0.21	0.0813	--
Biological Process	GO:0032869	cellular response to insulin stimulus	54	6	2.28	0.08142	gene13174：ADIPOQ，13174：down|gene17966：SOCS3，17966：down|gene21200：PDK2，21200：down|gene24885：PDK2，24885：down|gene3742：PDK4，3742：down|gene6062：RHOQ，6062：up
Biological Process	GO:0032373	positive regulation of sterol transport	8	1	0.34	0.08173	gene13174：ADIPOQ，13174：down
Biological Process	GO:0032376	positive regulation of cholesterol transport	8	1	0.34	0.08173	gene13174：ADIPOQ，13174：down
Molecular Function	GO:0016423	tRNA (guanine) methyltransferase activity	2	0	0.08	0.08177	--
Biological Process	GO:0050873	brown fat cell differentiation	17	2	0.72	0.08179	gene12279：RGS2，12279：down|gene13174：ADIPOQ，13174：down
Biological Process	GO:0010822	positive regulation of mitochondrion organization	8	0	0.34	0.08221	--
Molecular Function	GO:0003963	RNA-3'-phosphate cyclase activity	2	0	0.08	0.08227	--
Biological Process	GO:1903055	positive regulation of extracellular matrix organization	2	0	0.08	0.08235	--
Biological Process	GO:0010715	regulation of extracellular matrix disassembly	2	0	0.08	0.08235	--
Biological Process	GO:0090091	positive regulation of extracellular matrix disassembly	2	0	0.08	0.08235	--
Biological Process	GO:0032496	response to lipopolysaccharide	76	3	3.2	0.08241	gene186|gene20242：IL18，20242：down|gene3070：CD36，3070：down
Molecular Function	GO:0000293	ferric-chelate reductase activity	2	1	0.08	0.0825	gene12027：STEAP3，12027：up
Biological Process	GO:0009311	oligosaccharide metabolic process	15	1	0.63	0.08252	gene14077：SIAT8B，14077：down
Biological Process	GO:0009880	embryonic pattern specification	38	2	1.6	0.08255	gene11500：ERBB4，11500：up|gene1780
Molecular Function	GO:0005272	sodium channel activity	20	1	0.8	0.0826	Gallus_gallus_newGene_24651：LOC102114762，24651：up
Molecular Function	GO:0052745	inositol phosphate phosphatase activity	4	1	0.16	0.0826	gene4634：IMPA2，4634：up
Biological Process	GO:0030150	protein import into mitochondrial matrix	5	0	0.21	0.08265	--
Biological Process	GO:0006264	mitochondrial DNA replication	5	0	0.21	0.08269	--
Cellular Component	GO:0005905	clathrin-coated pit	19	0	0.75	0.08283	--
Biological Process	GO:0000920	cell separation after cytokinesis	5	0	0.21	0.08294	--
Molecular Function	GO:0042800	histone methyltransferase activity (H3-K4 specific)	6	0	0.24	0.08302	--
Biological Process	GO:0001816	cytokine production	179	9	7.55	0.08313	gene11190：GPAM，11190：down|gene13174：ADIPOQ，13174：down|gene13305：APOD，13305：up|gene14238：FURIN，14238：up|gene17531：AGPAT2，17531：down|gene186|gene20242：IL18，20242：down|gene3070：CD36，3070：down|gene8061：IL15，8061：down
Biological Process	GO:0051353	positive regulation of oxidoreductase activity	15	0	0.63	0.08347	--
Biological Process	GO:0007067	mitotic cell cycle	181	4	7.63	0.08358	gene16249：NDE1，16249：up|gene16853：KLHL22，16853：up|gene16919：CIT，16919：down|gene8686：PDS5A，8686：up
Biological Process	GO:0051050	positive regulation of transport	225	12	9.49	0.08367	gene11500：ERBB4，11500：up|gene1281：KPNA1，1281：up|gene13174：ADIPOQ，13174：down|gene13290：ZIC1，13290：down|gene153|gene186|gene20242：IL18，20242：down|gene23869：PFKM，23869：up|gene3070：CD36，3070：down|gene373|gene6062：RHOQ，6062：up|gene7663：FHL1，7663：down
Cellular Component	GO:0005740	mitochondrial envelope	242	9	9.49	0.08377	Gallus_gallus_newGene_6113：ND5，6113：up|gene11190：GPAM，11190：down|gene19390：MFN2，19390：up|gene23265：CKMT2，23265：up|gene2469：SLC25A30，2469：up|gene3742：PDK4，3742：down|gene5351：ABCB8，5351：down|gene6345：-，6345：up|gene8905：MIC60，8905：up
Biological Process	GO:0090114	COPII-coated vesicle budding	6	1	0.25	0.08394	gene3532：INSIG1，3532：up
Biological Process	GO:0008652	cellular amino acid biosynthetic process	65	4	2.74	0.08421	gene1067：BCAT1，1067：up|gene10692：MAT1A，10692：up|gene22325：CARNS1，22325：up|gene22733：BHMT，22733：up
Biological Process	GO:0007320	insemination	4	2	0.17	0.08423	gene13225：SERPINE2，13225：down|gene6684：DDO，6684：up
Biological Process	GO:0007620	copulation	4	2	0.17	0.08423	gene13225：SERPINE2，13225：down|gene6684：DDO，6684：up
Biological Process	GO:0015711	organic anion transport	105	5	4.43	0.08428	gene14701：SLC7A5，14701：up|gene186|gene3070：CD36，3070：down|gene402：SLC38A2，402：down|gene6345：-，6345：up
Molecular Function	GO:0004112	cyclic-nucleotide phosphodiesterase activity	21	1	0.84	0.0843	gene21821：PDE4C，21821：down
Cellular Component	GO:0005753	mitochondrial proton-transporting ATP synthase complex	10	0	0.39	0.08433	--
Biological Process	GO:0045444	fat cell differentiation	76	3	3.2	0.08438	gene12279：RGS2，12279：down|gene13174：ADIPOQ，13174：down|gene3532：INSIG1，3532：up
Cellular Component	GO:0030119	AP-type membrane coat adaptor complex	27	0	1.06	0.08453	--
Biological Process	GO:0002686	negative regulation of leukocyte migration	10	3	0.42	0.0846	gene13305：APOD，13305：up|gene19344：NBL1，19344：down|gene3864：，HOXA73864：up
Biological Process	GO:0046395	carboxylic acid catabolic process	83	5	3.5	0.08484	gene1067：BCAT1，1067：up|gene13174：ADIPOQ，13174：down|gene4993：DECR1，4993：down|gene6510：PEX7，6510：up|gene6684：DDO，6684：up
Biological Process	GO:0016054	organic acid catabolic process	83	5	3.5	0.08484	gene1067：BCAT1，1067：up|gene13174：ADIPOQ，13174：down|gene4993：DECR1，4993：down|gene6510：PEX7，6510：up|gene6684：DDO，6684：up
Biological Process	GO:0003016	respiratory system process	9	1	0.38	0.08485	gene3865：HOXA5，3865：up
Biological Process	GO:0016311	dephosphorylation	165	13	6.96	0.08491	gene10332：PPP1R36，10332：down|gene13306：PPP1R2，13306：up|gene13478：NCEH1，13478：up|gene19548：DUSP26，19548：down|gene25762：PPP1R37，25762：up|gene4634：IMPA2，4634：up|gene6459：SYNJ2，6459：down|gene6500：ARFGEF3，6500：down|gene6898：PTP4A1，6898：up|gene7147：EPHX2，7147：down|gene7201：MTMR9，7201：up|gene8588：MTMR7，8588：up|gene9871：ZFYVE1，9871：up
Molecular Function	GO:0004672	protein kinase activity	469	23	18.77	0.08495	Gallus_gallus_newGene_21022：ALPK3，21022：up|Gallus_gallus_newGene_21069：PHKB，21069：up|Gallus_gallus_newGene_47：LOC110391435，47：up|gene10074：NEK9，10074：up|gene11500：ERBB4，11500：up|gene13715：ALPK3，13715：up|gene153|gene15705：CAMK2A，15705：down|gene16746：MAPKAPK5，16746：up|gene16919：CIT，16919：down|gene19414：EPHB2，19414：down|gene20822：DYRK3，20822：up|gene20962：CCND3，20962：up|gene21200：PDK2，21200：down|gene…
Cellular Component	GO:0005849	mRNA cleavage factor complex	8	0	0.31	0.0851	--
Biological Process	GO:0048069	eye pigmentation	4	0	0.17	0.08511	--
Biological Process	GO:0035022	positive regulation of Rac protein signal transduction	3	2	0.13	0.08514	gene9599：HRAS，9599：down|gene9602：HRAS，9602：down
Biological Process	GO:0008090	retrograde axonal transport	5	0	0.21	0.08526	--
Molecular Function	GO:0016742	hydroxymethyl-, formyl- and related transferase activity	9	1	0.36	0.08528	gene1749：GART，1749：up
Biological Process	GO:0006577	amino-acid betaine metabolic process	10	0	0.42	0.08552	--
Molecular Function	GO:0009055	electron carrier activity	92	3	3.68	0.08559	Gallus_gallus_newGene_6113：ND5，6113：up|gene11645：AOX1，11645：up|gene23192：GLRX，23192：up
Biological Process	GO:0046135	pyrimidine nucleoside catabolic process	5	0	0.21	0.08565	--
Biological Process	GO:0019932	second-messenger-mediated signaling	55	3	2.32	0.0858	gene186|gene3070：CD36，3070：down|gene3483：CRHR2，3483：up
Biological Process	GO:0051125	regulation of actin nucleation	7	0	0.3	0.08595	--
Biological Process	GO:0009199	ribonucleoside triphosphate metabolic process	368	20	15.52	0.08595	Gallus_gallus_newGene_6113：ND5，6113：up|gene1037：RERG，1037：down|gene10995：ACTA2，10995：down|gene12279：RGS2，12279：down|gene14852：TNNC1，14852：up|gene16077：GNA12，16077：up|gene16416：NME3，16416：up|gene17386：AK1，17386：up|gene17721：TBCD，17721：up|gene19390：MFN2，19390：up|gene20684：TUBA1C，20684：up|gene22541：TPM2，22541：down|gene3361：ABCF2，3361：up|gene5351：ABCB8，5351：down|gene6062：RHOQ，6062：up|gene6283：RHOU，62…
Molecular Function	GO:0043560	insulin receptor substrate binding	5	0	0.2	0.08604	--
Molecular Function	GO:0003887	DNA-directed DNA polymerase activity	13	1	0.52	0.08617	gene1396：POLQ，1396：up
Biological Process	GO:0046677	response to antibiotic	16	1	0.67	0.0864	gene12303：CRIP1，12303：down
Molecular Function	GO:0004853	uroporphyrinogen decarboxylase activity	2	0	0.08	0.08667	--
Molecular Function	GO:0033613	activating transcription factor binding	34	2	1.36	0.08673	gene4085：TBX20，4085：down|gene8492：PITX2，8492：down
Biological Process	GO:0060538	skeletal muscle organ development	85	8	3.58	0.08733	gene13590：MBNL1，13590：up|gene14094：NR2F2，14094：down|gene15774：PITX1，15774：down|gene21609|gene22491：CNTFR，22491：up|gene24320：NR4A1，24320：up|gene8492：PITX2，8492：down|gene8898：ATOH8，8898：down
Molecular Function	GO:0001098	basal transcription machinery binding	11	0	0.44	0.08736	--
Molecular Function	GO:0001099	basal RNA polymerase II transcription machinery binding	11	0	0.44	0.08736	--
Biological Process	GO:0006779	porphyrin-containing compound biosynthetic process	13	0	0.55	0.08742	--
Cellular Component	GO:0097458	neuron part	233	19	9.14	0.08762	gene1281：KPNA1，1281：up|gene1284：VAMP1，1284：up|gene14627：CDH8，14627：up|gene19414：EPHB2，19414：down|gene21407：CNTNAP1，21407：down|gene24189：OPN1LW，24189：down|gene25858：ENO3，25858：up|gene2823：PAK1，2823：down|gene2920：GDPD5，2920：down|gene3533：EN2，3533：down|gene3890：BTD，3890：down|gene4218：NRSN1，4218：up|gene5570：EN2，5570：down|gene7634：FRMD7，7634：up|gene830：PVALB，830：down|gene8406：EPHA5，8406：down|gene8806：…
Biological Process	GO:0061013	regulation of mRNA catabolic process	8	0	0.34	0.08766	--
Biological Process	GO:0032446	protein modification by small protein conjugation	269	17	11.34	0.08771	Gallus_gallus_newGene_16404：UBR4，16404：up|gene10936：FBXL15，10936：up|gene11538：ASB18，11538：down|gene11805：UBR3，11805：up|gene1282：FBXO40，1282：up|gene13202：SPSB4，13202：down|gene13829：FBXO22，13829：up|gene14452：AMFR，14452：up|gene15184：ARIH2，15184：up|gene16853：KLHL22，16853：up|gene17554：UBAC1，17554：up|gene17966：SOCS3，17966：down|gene3364：ASB10，3364：up|gene3743：ASB4，3743：up|gene3916：UBE2E2，3916：down|gene4…
Biological Process	GO:2000973	regulation of pro-B cell differentiation	3	0	0.13	0.08781	--
Biological Process	GO:0045978	negative regulation of nucleoside metabolic process	3	0	0.13	0.08781	--
Cellular Component	GO:0035068	micro-ribonucleoprotein complex	5	0	0.2	0.08784	--
Biological Process	GO:0097009	energy homeostasis	6	0	0.25	0.08792	--
Biological Process	GO:0046467	membrane lipid biosynthetic process	43	2	1.81	0.08795	gene14077：SIAT8B，14077：down|gene6063：PIGF，6063：up
Biological Process	GO:2001243	negative regulation of intrinsic apoptotic signaling pathway	11	0	0.46	0.0881	--
Biological Process	GO:0009201	ribonucleoside triphosphate biosynthetic process	47	1	1.98	0.08839	gene16416：NME3，16416：up
Biological Process	GO:0071216	cellular response to biotic stimulus	47	3	1.98	0.0884	gene186|gene20242：IL18，20242：down|gene3070：CD36，3070：down
Biological Process	GO:0010934	macrophage cytokine production	9	2	0.38	0.08845	gene186|gene3070：CD36，3070：down
Biological Process	GO:0010935	regulation of macrophage cytokine production	9	2	0.38	0.08845	gene186|gene3070：CD36，3070：down
Biological Process	GO:0002041	intussusceptive angiogenesis	2	0	0.08	0.08845	--
Biological Process	GO:0035967	cellular response to topologically incorrect protein	24	1	1.01	0.08865	gene14452：AMFR，14452：up
Biological Process	GO:0018202	peptidyl-histidine modification	4	0	0.17	0.08868	--
Biological Process	GO:0046415	urate metabolic process	8	0	0.34	0.08869	--
Biological Process	GO:0007135	meiosis II	6	0	0.25	0.08873	--
Biological Process	GO:0045143	homologous chromosome segregation	6	0	0.25	0.08873	--
Biological Process	GO:0045144	meiotic sister chromatid segregation	6	0	0.25	0.08873	--
Biological Process	GO:0051177	meiotic sister chromatid cohesion	6	0	0.25	0.08873	--
Biological Process	GO:0033275	actin-myosin filament sliding	9	2	0.38	0.08876	gene10995：ACTA2，10995：down|gene14852：TNNC1，14852：up
Biological Process	GO:0021826	substrate-independent telencephalic tangential migration	6	1	0.25	0.08906	gene1950：ARX，1950：down
Biological Process	GO:0021843	substrate-independent telencephalic tangential interneuron migration	6	1	0.25	0.08906	gene1950：ARX，1950：down
Cellular Component	GO:0005664	nuclear origin of replication recognition complex	7	0	0.27	0.08911	--
Biological Process	GO:0033333	fin development	9	0	0.38	0.08939	--
Molecular Function	GO:0042577	lipid phosphatase activity	2	1	0.08	0.08951	gene7147：EPHX2，7147：down
Biological Process	GO:0007585	respiratory gaseous exchange	19	1	0.8	0.08955	gene3865：HOXA5，3865：up
Molecular Function	GO:0031683	G-protein beta/gamma-subunit complex binding	14	1	0.56	0.08969	gene16077：GNA12，16077：up
Biological Process	GO:2000193	positive regulation of fatty acid transport	5	0	0.21	0.08998	--
Biological Process	GO:0032305	positive regulation of icosanoid secretion	5	0	0.21	0.08998	--
Biological Process	GO:0032892	positive regulation of organic acid transport	5	0	0.21	0.08998	--
Biological Process	GO:0007519	skeletal muscle tissue development	81	7	3.42	0.09	gene13590：MBNL1，13590：up|gene14094：NR2F2，14094：down|gene15774：PITX1，15774：down|gene21609|gene24320：NR4A1，24320：up|gene8492：PITX2，8492：down|gene8898：ATOH8，8898：down
Biological Process	GO:0022617	extracellular matrix disassembly	3	0	0.13	0.09026	--
Biological Process	GO:1902101	positive regulation of metaphase/anaphase transition of cell cycle	5	0	0.21	0.09041	--
Biological Process	GO:0045842	positive regulation of mitotic metaphase/anaphase transition	5	0	0.21	0.09041	--
Biological Process	GO:0032611	interleukin-1 beta production	15	0	0.63	0.09044	--
Cellular Component	GO:0005892	acetylcholine-gated channel complex	12	0	0.47	0.09062	--
Biological Process	GO:0002886	regulation of myeloid leukocyte mediated immunity	9	0	0.38	0.09066	--
Biological Process	GO:1903305	regulation of regulated secretory pathway	9	0	0.38	0.09066	--
Biological Process	GO:0043300	regulation of leukocyte degranulation	9	0	0.38	0.09066	--
Biological Process	GO:0031848	protection from non-homologous end joining at telomere	5	0	0.21	0.09066	--
Biological Process	GO:0043247	telomere maintenance in response to DNA damage	5	0	0.21	0.09066	--
Biological Process	GO:0016567	protein ubiquitination	253	17	10.67	0.09072	Gallus_gallus_newGene_16404：UBR4，16404：up|gene10936：FBXL15，10936：up|gene11538：ASB18，11538：down|gene11805：UBR3，11805：up|gene1282：FBXO40，1282：up|gene13202：SPSB4，13202：down|gene13829：FBXO22，13829：up|gene14452：AMFR，14452：up|gene15184：ARIH2，15184：up|gene16853：KLHL22，16853：up|gene17554：UBAC1，17554：up|gene17966：SOCS3，17966：down|gene3364：ASB10，3364：up|gene3743：ASB4，3743：up|gene3916：UBE2E2，3916：down|gene4…
Biological Process	GO:0070230	positive regulation of lymphocyte apoptotic process	6	0	0.25	0.09075	--
Biological Process	GO:0006486	protein glycosylation	119	3	5.02	0.09078	gene14077：SIAT8B，14077：down|gene18145：WBSCR17，18145：down|gene5696：GALNT14，5696：down
Biological Process	GO:0043413	macromolecule glycosylation	119	3	5.02	0.09078	gene14077：SIAT8B，14077：down|gene18145：WBSCR17，18145：down|gene5696：GALNT14，5696：down
Biological Process	GO:0048814	regulation of dendrite morphogenesis	15	1	0.63	0.09091	gene16919：CIT，16919：down
Molecular Function	GO:0010576	enzyme regulator activity	5	2	0.2	0.09092	gene17961：TIMP2，17961：down|gene855：TIMP3，855：down
Molecular Function	GO:0008373	sialyltransferase activity	23	1	0.92	0.09097	gene14077：SIAT8B，14077：down
Molecular Function	GO:0042020	interleukin-23 receptor activity	2	0	0.08	0.09113	--
Molecular Function	GO:0042019	interleukin-23 binding	2	0	0.08	0.09113	--
Biological Process	GO:0051235	maintenance of location	115	3	4.85	0.09114	gene186|gene19344：NBL1，19344：down|gene3070：CD36，3070：down
Biological Process	GO:0000733	DNA strand renaturation	2	0	0.08	0.09144	--
Molecular Function	GO:0003840	obsolete gamma-glutamyltransferase activity	4	0	0.16	0.09145	--
Biological Process	GO:0006081	cellular aldehyde metabolic process	24	2	1.01	0.0915	Gallus_gallus_newGene_20049：TPI1，20049：up|gene1312：TPI1，1312：up
Biological Process	GO:0033124	obsolete regulation of GTP catabolic process	147	5	6.2	0.09159	gene12279：RGS2，12279：down|gene17721：TBCD，17721：up|gene8406：EPHA5，8406：down|gene9599：HRAS，9599：down|gene9602：HRAS，9602：down
Biological Process	GO:0044419	interspecies interaction between organisms	81	4	3.42	0.09174	gene17515：RXRA，17515：up|gene186|gene3070：CD36，3070：down|gene9515：TSG101，9515：up：TSG101，9515：up
Biological Process	GO:0044403	symbiosis, encompassing mutualism through parasitism	81	4	3.42	0.09174	gene17515：RXRA，17515：up|gene186|gene3070：CD36，3070：down|gene9515：TSG101，9515：up：TSG101，9515：up
Biological Process	GO:0001973	adenosine receptor signaling pathway	6	0	0.25	0.09189	--
Cellular Component	GO:0072536	interleukin-23 receptor complex	2	0	0.08	0.09209	--
Biological Process	GO:0006520	cellular amino acid metabolic process	206	10	8.69	0.09226	gene10010：EGLN3，10010：up|gene1067：BCAT1，1067：up|gene10692：MAT1A，10692：up|gene15340：ACY1，15340：up|gene16320：ABAT，16320：up|gene22325：CARNS1，22325：up|gene22733：BHMT，22733：up|gene2537：SLC25A15，2537：down|gene3877：HIBADH，3877：up|gene6684：DDO，6684：up
Biological Process	GO:0048251	elastic fiber assembly	3	0	0.13	0.09227	--
Molecular Function	GO:0043023	ribosomal large subunit binding	4	0	0.16	0.0924	--
Biological Process	GO:0003283	atrial septum development	11	1	0.46	0.09241	gene4085：TBX20，4085：down
Molecular Function	GO:0016889	endodeoxyribonuclease activity, producing 3'-phosphomonoesters	2	0	0.08	0.09242	--
Molecular Function	GO:0004531	deoxyribonuclease II activity	2	0	0.08	0.09242	--
Biological Process	GO:0048747	muscle fiber development	39	2	1.64	0.09265	gene21609|gene8492：PITX2，8492：down
Biological Process	GO:0046513	ceramide biosynthetic process	19	1	0.8	0.09266	gene14077：SIAT8B，14077：down
Biological Process	GO:0002252	immune effector process	194	4	8.18	0.09284	gene11190：GPAM，11190：down|gene186|gene3070：CD36，3070：down|gene8061：IL15，8061：down
Biological Process	GO:0031146	SCF-dependent proteasomal ubiquitin-dependent protein catabolic process	8	2	0.34	0.09287	gene10936：FBXL15，10936：up|gene14694：FBXO31，14694：up
Biological Process	GO:0000422	autophagy of mitochondrion	8	1	0.34	0.09287	gene1206：TIGAR，1206：up
Molecular Function	GO:0019145	aminobutyraldehyde dehydrogenase activity	2	0	0.08	0.09303	--
Biological Process	GO:0033006	regulation of mast cell activation involved in immune response	9	0	0.38	0.09304	--
Cellular Component	GO:0034704	calcium channel complex	19	0	0.75	0.09308	--
Biological Process	GO:0032855	positive regulation of GTPase activity	14	2	0.59	0.09311	gene9599：HRAS，9599：down|gene9602：HRAS，9602：down
Biological Process	GO:0016051	carbohydrate biosynthetic process	104	14	4.39	0.09313	Gallus_gallus_newGene_20049：TPI1，20049：up|Gallus_gallus_newGene_23546：GYS1，23546：up|gene11094：PGAM1，11094：up|gene11915：PRKAG3，11915：up|gene1312：TPI1，1312：up|gene13174：ADIPOQ，13174：down|gene14592：GPI，14592：up|gene21200：PDK2，21200：down|gene24885：PDK2，24885：down|gene25858：ENO3，25858：up|gene25911：GYS1，25911：up|gene26487：GYS1，26487：up|gene4735：CHST9，4735：down|gene7816：PGK，7816：up
Biological Process	GO:0022028	tangential migration from the subventricular zone to the olfactory bulb	3	1	0.13	0.09316	gene1950：ARX，1950：down
Biological Process	GO:0007016	cytoskeletal anchoring at plasma membrane	5	0	0.21	0.09316	--
Molecular Function	GO:0004175	endopeptidase activity	223	6	8.92	0.09325	gene11277：HTRA1，11277：down|ggene11856：FAP，11856：down|gene14238：FURIN，14238：up|gene14632：ADAMTS18，14632：down|gene20089：ADAMTS15，20089：down|gene8826：HTRA3，8826：down
Biological Process	GO:0071345	cellular response to cytokine stimulus	143	4	6.03	0.09331	gene10986：CXCL12，10986：down|gene13174：ADIPOQ，13174：down|gene15491：SLIT3，15491：down|gene4734：AQP4，4734：up
Biological Process	GO:0042176	regulation of protein catabolic process	98	5	4.13	0.09349	gene13225：SERPINE2，13225：down|gene13829：FBXO22，13829：up|gene14238：FURIN，14238：up|gene7086：UBXN2A，7086：up|gene855：TIMP3，855：down
Biological Process	GO:0009583	detection of light stimulus	24	1	1.01	0.09355	gene24189：OPN1LW，24189：down
Biological Process	GO:0009083	branched-chain amino acid catabolic process	4	1	0.17	0.09359	gene1067：BCAT1，1067：up
Biological Process	GO:0000280	nuclear division	237	4	9.99	0.09363	gene16249：NDE1，16249：up|gene16853：KLHL22，16853：up|gene16919：CIT，16919：down|gene8686：PDS5A，8686：up
Biological Process	GO:0046874	quinolinate metabolic process	4	0	0.17	0.09368	--
Biological Process	GO:0019805	quinolinate biosynthetic process	4	0	0.17	0.09368	--
Biological Process	GO:0043420	anthranilate metabolic process	4	0	0.17	0.09368	--
Biological Process	GO:0010216	maintenance of DNA methylation	3	0	0.13	0.09374	--
Biological Process	GO:0021575	hindbrain morphogenesis	27	1	1.14	0.09418	gene13225：SERPINE2，13225：down
Biological Process	GO:0016032	viral process	57	2	2.4	0.0943	gene17515：RXRA，17515：up|gene9515：TSG101，9515：up：TSG101，9515：up
Biological Process	GO:0045786	negative regulation of cell cycle	115	10	4.85	0.09432	gene14094：NR2F2，14094：down|gene16853：KLHL22，16853：up|gene17386：AK1，17386：up|gene19194：TP73，19194：up|gene20767：CDKN1A，20767：up|gene6697：SESN1，6697：up|gene7663：FHL1，7663：down|gene9515：TSG101，9515：up：TSG101，9515：up|gene9599：HRAS，9599：down|gene9602：HRAS，9602：down
Molecular Function	GO:0051020	GTPase binding	65	1	2.6	0.09433	gene4246：RANBP9，4246：up
Biological Process	GO:0030910	olfactory placode formation	3	0	0.13	0.09448	--
Biological Process	GO:0071698	olfactory placode development	3	0	0.13	0.09448	--
Biological Process	GO:0071699	olfactory placode morphogenesis	3	0	0.13	0.09448	--
Biological Process	GO:0021898	commitment of multipotent stem cells to neuronal lineage in forebrain	3	0	0.13	0.09448	--
Biological Process	GO:0032781	positive regulation of ATPase activity	12	0	0.51	0.09449	--
Cellular Component	GO:0015629	actin cytoskeleton	190	16	7.45	0.09461	Gallus_gallus_newGene_15489：CIB84_010615，15489：up|gene10995：ACTA2，10995：down|gene14852：TNNC1，14852：up|gene16919：CIT，16919：down|gene17665：MYH1F，17665：down|gene17669：MYH1B，17669：up|gene17671：MYH1E，17671：up|gene17673：MYH1C，17673：down|gene17915：CDC42EP4，17915：down|gene19848：FHL3，19848：down|gene20708：MYBPH，20708：up|gene22541：TPM2，22541：down|gene5776：BFSP1，5776：up|gene6062：RHOQ，6062：up|gene8461：MYOZ2，8…
Molecular Function	GO:0017137	Rab GTPase binding	20	0	0.8	0.09469	--
Biological Process	GO:0045714	regulation of low-density lipoprotein particle receptor biosynthetic process	4	1	0.17	0.09473	gene13174：ADIPOQ，13174：down
Biological Process	GO:1901992	positive regulation of mitotic cell cycle phase transition	12	0	0.51	0.09482	--
Cellular Component	GO:0043005	neuron projection	184	15	7.22	0.09488	gene1281：KPNA1，1281：up|gene1284：VAMP1，1284：up|gene14627：CDH8，14627：up|gene19414：EPHB2，19414：down|gene21407：CNTNAP1，21407：down|gene2823：PAK1，2823：down|gene2920：GDPD5，2920：down|gene3533：EN2，3533：down|gene4218：NRSN1，4218：up|gene5570：EN2，5570：down|gene7634：FRMD7，7634：up|gene830：PVALB，830：down|gene8406：EPHA5，8406：down|gene8806：DPYSL2，8806：down|gene954：MTPN，954：down
Biological Process	GO:2000378	negative regulation of reactive oxygen species metabolic process	4	1	0.17	0.09521	gene1206：TIGAR，1206：up
Molecular Function	GO:0050815	phosphoserine residue binding	4	0	0.16	0.09521	--
Biological Process	GO:0032868	response to insulin	63	6	2.66	0.09546	gene13174：ADIPOQ，13174：down|gene17966：SOCS3，17966：down|gene21200：PDK2，21200：down|gene24885：PDK2，24885：down|gene3742：PDK4，3742：down|gene6062：RHOQ，6062：up
Cellular Component	GO:0031252	cell leading edge	119	5	4.67	0.0955	gene13603：CLRN1，13603：up|gene16919：CIT，16919：down|gene2823：PAK1，2823：down|gene3533：EN2，3533：down|gene5570：EN2，5570：down
Biological Process	GO:0031937	positive regulation of chromatin silencing	2	0	0.08	0.09551	--
Cellular Component	GO:0072686	mitotic spindle	14	1	0.55	0.09561	gene16853：KLHL22，16853：up
Molecular Function	GO:0070061	fructose binding	2	1	0.08	0.09565	gene23869：PFKM，23869：up
Biological Process	GO:0060261	positive regulation of transcription initiation from RNA polymerase II promoter	4	0	0.17	0.09569	--
Biological Process	GO:0072114	pronephros morphogenesis	4	0	0.17	0.09569	--
Molecular Function	GO:0050431	transforming growth factor beta binding	7	0	0.28	0.09586	--
Biological Process	GO:0009069	serine family amino acid metabolic process	19	0	0.8	0.09587	--
Biological Process	GO:0021702	cerebellar Purkinje cell differentiation	10	0	0.42	0.09591	--
Biological Process	GO:0021694	cerebellar Purkinje cell layer formation	10	0	0.42	0.09591	--
Biological Process	GO:0015748	organophosphate ester transport	22	0	0.93	0.09602	--
Biological Process	GO:0086010	membrane depolarization during action potential	3	0	0.13	0.09614	--
Biological Process	GO:0086012	membrane depolarization during cardiac muscle cell action potential	3	0	0.13	0.09614	--
Biological Process	GO:0035922	foramen ovale closure	3	1	0.13	0.09614	gene4085：TBX20，4085：down
Biological Process	GO:0003193	pulmonary valve formation	3	1	0.13	0.09614	gene4085：TBX20，4085：down
Biological Process	GO:1900825	regulation of membrane depolarization during cardiac muscle cell action potential	3	0	0.13	0.09614	--
Biological Process	GO:0003284	septum primum development	3	0	0.13	0.09614	--
Biological Process	GO:0098901	regulation of cardiac muscle cell action potential	3	0	0.13	0.09614	--
Biological Process	GO:0098902	regulation of membrane depolarization during action potential	3	0	0.13	0.09614	--
Biological Process	GO:0035024	negative regulation of Rho protein signal transduction	4	0	0.17	0.09685	--
Biological Process	GO:0045713	low-density lipoprotein particle receptor biosynthetic process	5	1	0.21	0.09702	gene13174：ADIPOQ，13174：down
Molecular Function	GO:0003868	4-hydroxyphenylpyruvate dioxygenase activity	3	0	0.12	0.09722	--
Biological Process	GO:0016579	protein deubiquitination	38	0	1.6	0.09726	--
Biological Process	GO:0032462	regulation of protein homooligomerization	8	0	0.34	0.09735	--
Molecular Function	GO:0008009	chemokine activity	22	1	0.88	0.09803	gene10986：CXCL12，10986：down
Cellular Component	GO:0019867	outer membrane	46	1	1.8	0.09805	gene19390：MFN2，19390：up
Biological Process	GO:0002449	lymphocyte mediated immunity	83	0	3.5	0.09822	--
Biological Process	GO:0042743	hydrogen peroxide metabolic process	9	0	0.38	0.0983	--
Molecular Function	GO:0005057	signal transducer activity, downstream of receptor	43	1	1.72	0.09863	gene11500：ERBB4，11500：up
Cellular Component	GO:0030118	clathrin coat	26	0	1.02	0.09869	--
Biological Process	GO:0060628	regulation of ER to Golgi vesicle-mediated transport	6	1	0.25	0.09871	gene3532：INSIG1，3532：up
Biological Process	GO:0017158	regulation of calcium ion-dependent exocytosis	14	0	0.59	0.09877	--
Molecular Function	GO:0051059	NF-kappaB binding	15	0	0.6	0.09879	--
Biological Process	GO:1903362	regulation of cellular protein catabolic process	57	2	2.4	0.09882	gene13829：FBXO22，13829：up|gene14238：FURIN，14238：up
Molecular Function	GO:0015026	coreceptor activity	4	0	0.16	0.09882	--
Biological Process	GO:0046034	ATP metabolic process	103	7	4.34	0.09895	Gallus_gallus_newGene_6113：ND5，6113：up|gene10995：ACTA2，10995：down|gene14852：TNNC1，14852：up|gene17386：AK1，17386：up|gene22541：TPM2，22541：down|gene3361：ABCF2，3361：up|gene5351：ABCB8，5351：down
Biological Process	GO:0045216	cell-cell junction organization	65	4	2.74	0.09898	gene13305：APOD，13305：up|gene19557：ZNF703，19557：down|gene20872：RHOC，20872：down|gene21407：CNTNAP1，21407：down
Biological Process	GO:0045649	regulation of macrophage differentiation	14	1	0.59	0.09926	gene13174：ADIPOQ，13174：down
Biological Process	GO:0006165	nucleoside diphosphate phosphorylation	6	1	0.25	0.09931	gene17386：AK1，17386：up
Biological Process	GO:0007389	pattern specification process	266	19	11.22	0.09959	gene10986：CXCL12，10986：down|gene11236：EMX2，11236：down|gene11500：ERBB4，11500：up|gene12741：FOXD2，12741：down|gene13290：ZIC1，13290：down|gene14094：NR2F2，14094：down|gene16851：CRKL，16851：up|gene1780|gene17809：NOTUM，17809：up|gene19344：NBL1，19344：down|gene22090：HOXC6，22090：up：HOXC6，22090：up|gene22906|gene25417：ALDOA，25417：up|gene3864：，HOXA73864：up|gene3865：HOXA5，3865：up|gene3866：HOXA6，3866：up|gene4085：TBX…
Cellular Component	GO:0045495	pole plasm	10	0	0.39	0.09964	--
Cellular Component	GO:0043186	P granule	10	0	0.39	0.09964	--
Cellular Component	GO:0060293	germ plasm	10	0	0.39	0.09964	--
Molecular Function	GO:0004176	ATP-dependent peptidase activity	5	0	0.2	0.09966	--
Molecular Function	GO:0000268	peroxisome targeting sequence binding	2	1	0.08	0.09982	gene6510：PEX7，6510：up
Biological Process	GO:1902743	regulation of lamellipodium organization	10	1	0.42	0.09985	gene13603：CLRN1，13603：up
Biological Process	GO:1901990	regulation of mitotic cell cycle phase transition	79	5	3.33	0.10006	gene14694：FBXO31，14694：up|gene16853：KLHL22，16853：up|gene7663：FHL1，7663：down|gene9599：HRAS，9599：down|gene9602：HRAS，9602：down
Biological Process	GO:0019722	calcium-mediated signaling	29	0	1.22	0.10055	--
Biological Process	GO:0043508	negative regulation of JUN kinase activity	7	1	0.3	0.10062	gene19194：TP73，19194：up
Cellular Component	GO:0031300	intrinsic component of organelle membrane	115	4	4.51	0.1012	Gallus_gallus_newGene_24723：LOC106899679，24723：up|gene14077：SIAT8B，14077：down|gene14452：AMFR，14452：up|gene3532：INSIG1，3532：up
Biological Process	GO:0010948	negative regulation of cell cycle process	89	5	3.75	0.10163	gene14694：FBXO31，14694：up|gene16853：KLHL22，16853：up|gene7663：FHL1，7663：down|gene9599：HRAS，9599：down|gene9602：HRAS，9602：down
Biological Process	GO:0072348	sulfur compound transport	15	1	0.63	0.10167	gene208
Biological Process	GO:0032106	positive regulation of response to extracellular stimulus	11	0	0.46	0.10167	--
Biological Process	GO:0032109	positive regulation of response to nutrient levels	11	0	0.46	0.10167	--
Molecular Function	GO:0035259	glucocorticoid receptor binding	3	0	0.12	0.10176	--
Biological Process	GO:0030516	regulation of axon extension	21	2	0.89	0.10177	gene14973：SEMA3F，14973：down|gene5849：TTL，gene5849：up
Biological Process	GO:0006122	mitochondrial electron transport, ubiquinol to cytochrome c	6	1	0.25	0.10185	Gallus_gallus_newGene_6113：ND5，6113：up
Biological Process	GO:0046426	negative regulation of JAK-STAT cascade	6	0	0.25	0.10197	--
Molecular Function	GO:0016894	endonuclease activity, active with either ribo- or deoxyribonucleic acids and producing 3'-phosphomonoesters	7	0	0.28	0.10204	--
Molecular Function	GO:0005219	ryanodine-sensitive calcium-release channel activity	11	1	0.44	0.10219	gene9947：RYR3，9947：up
Biological Process	GO:0009144	purine nucleoside triphosphate metabolic process	361	20	15.22	0.10235	Gallus_gallus_newGene_6113：ND5，6113：up|gene1037：RERG，1037：down|gene10995：ACTA2，10995：down|gene12279：RGS2，12279：down|gene14852：TNNC1，14852：up|gene16077：GNA12，16077：up|gene16416：NME3，16416：up|gene17386：AK1，17386：up|gene17721：TBCD，17721：up|gene19390：MFN2，19390：up|gene20684：TUBA1C，20684：up|gene22541：TPM2，22541：down|gene3361：ABCF2，3361：up|gene5351：ABCB8，5351：down|gene6062：RHOQ，6062：up|gene6283：RHOU，62…
Biological Process	GO:0009205	purine ribonucleoside triphosphate metabolic process	361	20	15.22	0.10235	Gallus_gallus_newGene_6113：ND5，6113：up|gene1037：RERG，1037：down|gene10995：ACTA2，10995：down|gene12279：RGS2，12279：down|gene14852：TNNC1，14852：up|gene16077：GNA12，16077：up|gene16416：NME3，16416：up|gene17386：AK1，17386：up|gene17721：TBCD，17721：up|gene19390：MFN2，19390：up|gene20684：TUBA1C，20684：up|gene22541：TPM2，22541：down|gene3361：ABCF2，3361：up|gene5351：ABCB8，5351：down|gene6062：RHOQ，6062：up|gene6283：RHOU，62…
Biological Process	GO:0097237	cellular response to toxic substance	4	1	0.17	0.10252	gene12303：CRIP1，12303：down
Biological Process	GO:0071236	cellular response to antibiotic	4	1	0.17	0.10252	gene12303：CRIP1，12303：down
Biological Process	GO:0006487	protein N-linked glycosylation	21	1	0.89	0.10253	gene14077：SIAT8B，14077：down
Biological Process	GO:0045879	negative regulation of smoothened signaling pathway	16	1	0.67	0.10281	gene13225：SERPINE2，13225：down
Biological Process	GO:0006493	protein O-linked glycosylation	16	0	0.67	0.10281	--
Biological Process	GO:0070085	glycosylation	123	3	5.19	0.10315	gene14077：SIAT8B，14077：down|gene18145：WBSCR17，18145：down|gene5696：GALNT14，5696：down
Biological Process	GO:0050808	synapse organization	63	2	2.66	0.10329	gene19414：EPHB2，19414：down|gene2823：PAK1，2823：down
Cellular Component	GO:0005684	U2-type spliceosomal complex	3	0	0.12	0.10335	--
Molecular Function	GO:0002162	dystroglycan binding	7	0	0.28	0.10354	--
Molecular Function	GO:0016775	phosphotransferase activity, nitrogenous group as acceptor	8	1	0.32	0.10384	gene23265：CKMT2，23265：up
Biological Process	GO:0061564	axon development	165	12	6.96	0.10413	gene10986：CXCL12，10986：down|gene12741：FOXD2，12741：down|gene14973：SEMA3F，14973：down|gene15491：SLIT3，15491：down|gene19414：EPHB2，19414：down|gene1950：ARX，1950：down|gene25417：ALDOA，25417：up|gene3533：EN2，3533：down|gene5570：EN2，5570：down|gene5849：TTL，gene5849：up|gene8406：EPHA5，8406：down|gene8507：UNC5C，8507：down
Biological Process	GO:0071466	cellular response to xenobiotic stimulus	12	1	0.51	0.10417	gene13478：NCEH1，13478：up
Biological Process	GO:0034505	tooth mineralization	9	0	0.38	0.10419	--
Cellular Component	GO:0043596	nuclear replication fork	8	0	0.31	0.10419	--
Biological Process	GO:0050732	negative regulation of peptidyl-tyrosine phosphorylation	17	0	0.72	0.10446	--
Biological Process	GO:0070498	interleukin-1-mediated signaling pathway	8	0	0.34	0.10474	--
Biological Process	GO:0007100	mitotic centrosome separation	5	0	0.21	0.10481	--
Biological Process	GO:0048532	anatomical structure arrangement	6	0	0.25	0.1049	--
Cellular Component	GO:0005743	mitochondrial inner membrane	183	7	7.18	0.10497	Gallus_gallus_newGene_6113：ND5，6113：up|gene11190：GPAM，11190：down|gene23265：CKMT2，23265：up|gene3742：PDK4，3742：down|gene5351：ABCB8，5351：down|gene6345：-，6345：up|gene8905：MIC60，8905：up
Biological Process	GO:0035640	exploration behavior	8	2	0.34	0.10503	gene14698：JPH3，14698：up|gene14699：JPH3，14699：up
Biological Process	GO:0035305	negative regulation of dephosphorylation	4	0	0.17	0.10509	--
Biological Process	GO:0002478	antigen processing and presentation of exogenous peptide antigen	11	0	0.46	0.10518	--
Biological Process	GO:0072528	pyrimidine-containing compound biosynthetic process	26	1	1.1	0.10522	gene16416：NME3，16416：up
Biological Process	GO:0060119	inner ear receptor cell development	14	1	0.59	0.10596	gene13603：CLRN1，13603：up
Molecular Function	GO:0008138	protein tyrosine/serine/threonine phosphatase activity	40	2	1.6	0.10596	gene19548：DUSP26，19548：down|gene6898：PTP4A1，6898：up
Molecular Function	GO:0016620	oxidoreductase activity, acting on the aldehyde or oxo group of donors, NAD or NADP as acceptor	22	2	0.88	0.106	gene16745：ALDH2，16745：up|gene22950：ALDH1A1，22950：up
Molecular Function	GO:0000976	transcription regulatory region sequence-specific DNA binding	104	7	4.16	0.10606	gene11236：EMX2，11236：down|gene1374：TBX15，1374：down|gene20078：BARX2，20078：down|gene3533：EN2，3533：down|gene4085：TBX20，4085：down|gene5570：EN2，5570：down|gene8492：PITX2，8492：down
Biological Process	GO:0048285	organelle fission	250	4	10.54	0.10634	gene16249：NDE1，16249：up|gene16853：KLHL22，16853：up|gene16919：CIT，16919：down|gene8686：PDS5A，8686：up
Cellular Component	GO:0005930	axoneme	6	1	0.24	0.10644	gene17386：AK1，17386：up
Cellular Component	GO:0097014	ciliary plasm	6	1	0.24	0.10644	gene17386：AK1，17386：up
Cellular Component	GO:0036064	ciliary basal body	6	0	0.24	0.10644	--
Molecular Function	GO:0042169	SH2 domain binding	17	0	0.68	0.10649	--
Biological Process	GO:0006972	hyperosmotic response	3	0	0.13	0.1067	--
Biological Process	GO:0048630	skeletal muscle tissue growth	2	0	0.08	0.10697	--
Molecular Function	GO:0043734	DNA-N1-methyladenine dioxygenase activity	3	0	0.12	0.10697	--
Molecular Function	GO:0035514	DNA demethylase activity	3	0	0.12	0.10697	--
Biological Process	GO:0034620	cellular response to unfolded protein	21	1	0.89	0.10717	gene14452：AMFR，14452：up
Molecular Function	GO:0015248	sterol transporter activity	6	0	0.24	0.10742	--
Biological Process	GO:0097006	regulation of plasma lipoprotein particle levels	23	3	0.97	0.10753	gene13174：ADIPOQ，13174：down|gene186|gene3070：CD36，3070：down
Biological Process	GO:0006044	N-acetylglucosamine metabolic process	8	0	0.34	0.10755	--
Biological Process	GO:0034383	low-density lipoprotein particle clearance	7	3	0.3	0.10766	gene13174：ADIPOQ，13174：down|gene186|gene3070：CD36，3070：down
Biological Process	GO:0043087	regulation of GTPase activity	146	5	6.16	0.10777	gene12279：RGS2，12279：down|gene17721：TBCD，17721：up|gene8406：EPHA5，8406：down|gene9599：HRAS，9599：down|gene9602：HRAS，9602：down
Biological Process	GO:0018095	protein polyglutamylation	4	0	0.17	0.10802	--
Molecular Function	GO:0015440	peptide-transporting ATPase activity	3	0	0.12	0.10824	--
Cellular Component	GO:0001725	stress fiber	15	2	0.59	0.10826	gene19848：FHL3，19848：down|gene22541：TPM2，22541：down
Biological Process	GO:0055119	relaxation of cardiac muscle	3	1	0.13	0.10838	gene12279：RGS2，12279：down
Biological Process	GO:0046939	nucleotide phosphorylation	8	1	0.34	0.10845	gene17386：AK1，17386：up
Biological Process	GO:0046626	regulation of insulin receptor signaling pathway	17	1	0.72	0.10857	gene17966：SOCS3，17966：down
Biological Process	GO:0031124	mRNA 3'-end processing	26	0	1.1	0.10894	--
Biological Process	GO:2000653	regulation of genetic imprinting	2	0	0.08	0.10899	--
Biological Process	GO:0070232	regulation of T cell apoptotic process	5	1	0.21	0.10904	gene11190：GPAM，11190：down
Biological Process	GO:0009071	serine family amino acid catabolic process	8	0	0.34	0.10905	--
Biological Process	GO:0048853	forebrain morphogenesis	11	1	0.46	0.10912	gene13290：ZIC1，13290：down
Biological Process	GO:2001234	negative regulation of apoptotic signaling pathway	19	0	0.8	0.10938	--
Biological Process	GO:0034976	response to endoplasmic reticulum stress	40	1	1.69	0.10943	gene14452：AMFR，14452：up
Biological Process	GO:0070208	protein heterotrimerization	7	3	0.3	0.10949	gene11571：COL6A2，11571：down|gene13174：ADIPOQ，13174：down|gene3736：COL1A2，3736：down
Molecular Function	GO:0016997	alpha-sialidase activity	2	0	0.08	0.10949	--
Molecular Function	GO:0004308	exo-alpha-sialidase activity	2	0	0.08	0.10949	--
Biological Process	GO:0033344	cholesterol efflux	18	1	0.76	0.10957	gene13174：ADIPOQ，13174：down
Biological Process	GO:0032799	low-density lipoprotein receptor particle metabolic process	7	2	0.3	0.10972	gene13174：ADIPOQ，13174：down|gene14238：FURIN，14238：up
Biological Process	GO:0034370	triglyceride-rich lipoprotein particle remodeling	5	0	0.21	0.10988	--
Biological Process	GO:0034372	very-low-density lipoprotein particle remodeling	5	0	0.21	0.10988	--
Molecular Function	GO:0008187	poly-pyrimidine tract binding	5	1	0.2	0.10996	gene16908：MSI1，16908：up
Molecular Function	GO:0008266	poly(U) RNA binding	5	1	0.2	0.10996	gene16908：MSI1，16908：up
Molecular Function	GO:0016773	phosphotransferase activity, alcohol group as acceptor	557	25	22.29	0.11007	Gallus_gallus_newGene_21022：ALPK3，21022：up|Gallus_gallus_newGene_21069：PHKB，21069：up|Gallus_gallus_newGene_47：LOC110391435，47：up|gene10074：NEK9，10074：up|gene11500：ERBB4，11500：up|gene13715：ALPK3，13715：up|gene1374：TBX15，1374：down|gene13746：PKM，13746：up|gene153|gene15705：CAMK2A，15705：down|gene16746：MAPKAPK5，16746：up|gene16919：CIT，16919：down|gene19414：EPHB2，19414：down|gene20822：DYRK3，20822：up|gene209…
Molecular Function	GO:0015379	potassium:chloride symporter activity	4	0	0.16	0.11009	--
Biological Process	GO:0032414	positive regulation of ion transmembrane transporter activity	17	0	0.72	0.11033	--
Biological Process	GO:0072655	establishment of protein localization to mitochondrion	23	1	0.97	0.11045	gene19390：MFN2，19390：up
Biological Process	GO:0045324	late endosome to vacuole transport	3	0	0.13	0.11051	--
Biological Process	GO:0034379	very-low-density lipoprotein particle assembly	3	0	0.13	0.11051	--
Biological Process	GO:1903335	regulation of vacuolar transport	3	0	0.13	0.11051	--
Biological Process	GO:0086091	regulation of heart rate by cardiac conduction	6	0	0.25	0.11113	--
Biological Process	GO:0046185	aldehyde catabolic process	4	0	0.17	0.11135	--
Molecular Function	GO:0016903	oxidoreductase activity, acting on the aldehyde or oxo group of donors	27	2	1.08	0.11144	gene16745：ALDH2，16745：up|gene22950：ALDH1A1，22950：up
Cellular Component	GO:0000109	nucleotide-excision repair complex	6	0	0.24	0.11147	--
Molecular Function	GO:0032296	double-stranded RNA-specific ribonuclease activity	6	0	0.24	0.11175	--
Molecular Function	GO:0004525	ribonuclease III activity	6	0	0.24	0.11175	--
Biological Process	GO:0070536	protein K63-linked deubiquitination	8	0	0.34	0.11195	--
Biological Process	GO:0008078	mesodermal cell migration	3	0	0.13	0.11198	--
Molecular Function	GO:0031013	troponin I binding	6	1	0.24	0.11216	gene14852：TNNC1，14852：up
Cellular Component	GO:0044441	ciliary part	35	1	1.37	0.11237	gene17386：AK1，17386：up
Biological Process	GO:0071312	cellular response to alkaloid	4	0	0.17	0.11244	--
Biological Process	GO:0021761	limbic system development	40	4	1.69	0.11258	gene11236：EMX2，11236：down|gene19194：TP73，19194：up|gene8406：EPHA5，8406：down|gene8492：PITX2，8492：down
Biological Process	GO:0015889	cobalamin transport	3	0	0.13	0.11264	--
Biological Process	GO:0000060	protein import into nucleus, translocation	21	0	0.89	0.11276	--
Biological Process	GO:0045806	negative regulation of endocytosis	12	1	0.51	0.11276	gene13174：ADIPOQ，13174：down
Biological Process	GO:0042762	regulation of sulfur metabolic process	7	3	0.3	0.11293	gene21200：PDK2，21200：down|gene24885：PDK2，24885：down|gene3742：PDK4，3742：down
Molecular Function	GO:0031402	sodium ion binding	5	0	0.2	0.11299	--
Molecular Function	GO:0070412	R-SMAD binding	14	0	0.56	0.11321	--
Molecular Function	GO:0048365	Rac GTPase binding	9	0	0.36	0.11336	--
Biological Process	GO:0002260	lymphocyte homeostasis	22	1	0.93	0.1134	gene11190：GPAM，11190：down
Biological Process	GO:0050961	detection of temperature stimulus involved in sensory perception	2	0	0.08	0.11367	--
Biological Process	GO:0050965	detection of temperature stimulus involved in sensory perception of pain	2	0	0.08	0.11367	--
Biological Process	GO:0046449	creatinine metabolic process	2	0	0.08	0.11374	--
Biological Process	GO:0071492	cellular response to UV-A	2	0	0.08	0.11374	--
Biological Process	GO:0072338	cellular lactam metabolic process	2	0	0.08	0.11374	--
Biological Process	GO:0017157	regulation of exocytosis	42	0	1.77	0.11382	--
Cellular Component	GO:0031616	spindle pole centrosome	4	1	0.16	0.11393	gene16249：NDE1，16249：up
Molecular Function	GO:0000340	RNA 7-methylguanosine cap binding	6	0	0.24	0.11411	--
Biological Process	GO:0010389	regulation of G2/M transition of mitotic cell cycle	8	1	0.34	0.11427	gene7663：FHL1，7663：down
Biological Process	GO:0035511	oxidative DNA demethylation	3	0	0.13	0.11435	--
Biological Process	GO:0032652	regulation of interleukin-1 production	14	0	0.59	0.11444	--
Molecular Function	GO:0005089	Rho guanyl-nucleotide exchange factor activity	37	1	1.48	0.11445	gene13065：ARHGEF4，13065：up
Molecular Function	GO:0005198	structural molecule activity	478	10	19.13	0.11467	Gallus_gallus_newGene_23591：COL3A1，23591：down|gene1084：LDHB，1084：down|gene11472：COL3A1，11472：down|gene13852：RPS27L，13852：up|gene16182：RPL3L，16182：up|gene20684：TUBA1C，20684：up|gene24026：COL1A1，24026：down|gene3182：LDHB，3182：down|gene3736：COL1A2，3736：down|gene5776：BFSP1，5776：up
Biological Process	GO:0050774	negative regulation of dendrite morphogenesis	3	1	0.13	0.11474	gene16919：CIT，16919：down
Biological Process	GO:0090200	positive regulation of release of cytochrome c from mitochondria	4	0	0.17	0.11486	--
Cellular Component	GO:0005741	mitochondrial outer membrane	38	1	1.49	0.11517	gene19390：MFN2，19390：up
Molecular Function	GO:0001671	ATPase activator activity	7	0	0.28	0.11533	--
Biological Process	GO:0090238	positive regulation of arachidonic acid secretion	3	0	0.13	0.11551	--
Biological Process	GO:0002901	mature B cell apoptotic process	3	0	0.13	0.11551	--
Biological Process	GO:0002905	regulation of mature B cell apoptotic process	3	0	0.13	0.11551	--
Biological Process	GO:0002906	negative regulation of mature B cell apoptotic process	3	0	0.13	0.11551	--
Biological Process	GO:2000341	regulation of chemokine (C-X-C motif) ligand 2 production	3	0	0.13	0.11551	--
Biological Process	GO:2000343	positive regulation of chemokine (C-X-C motif) ligand 2 production	3	0	0.13	0.11551	--
Biological Process	GO:0010769	regulation of cell morphogenesis involved in differentiation	88	4	3.71	0.11556	gene14973：SEMA3F，14973：down|gene16919：CIT，16919：down|gene19414：EPHB2，19414：down|gene5849：TTL，gene5849：up
Biological Process	GO:0030917	midbrain-hindbrain boundary development	7	0	0.3	0.11561	--
Cellular Component	GO:0005845	mRNA cap binding complex	10	0	0.39	0.11598	--
Molecular Function	GO:0016705	oxidoreductase activity, acting on paired donors, with incorporation or reduction of molecular oxygen	102	4	4.08	0.11607	gene10010：EGLN3，10010：up|gene16135：ALKBH5，gene16135：up|gene17754：JMJD6，17754：up|gene9508：TPH1，9508：up
Biological Process	GO:0046323	glucose import	29	2	1.22	0.11632	gene13174：ADIPOQ，13174：down|gene6062：RHOQ，6062：up
Biological Process	GO:0045085	negative regulation of interleukin-2 biosynthetic process	2	0	0.08	0.11634	--
Biological Process	GO:0043550	regulation of lipid kinase activity	19	1	0.8	0.11661	gene11500：ERBB4，11500：up
Biological Process	GO:1901070	guanosine-containing compound biosynthetic process	14	1	0.59	0.11665	gene16416：NME3，16416：up
Biological Process	GO:0001501	skeletal system development	233	17	9.83	0.11669	gene10245：DLK1，10245：down|gene1197：PTHLH，1197：down|gene12338：PMX1，12338：down|gene12741：FOXD2，12741：down|gene1374：TBX15，1374：down|gene15774：PITX1，15774：down|gene20078：BARX2，20078：down|gene202|gene22090：HOXC6，22090：up：HOXC6，22090：up|gene3532：INSIG1，3532：up|gene3736：COL1A2，3736：down|gene3776：SCIN，3776：down|gene3864：，HOXA73864：up|gene3865：HOXA5，3865：up|gene3866：HOXA6，3866：up|gene6510：PEX7，6510：up|gen…
Biological Process	GO:0010661	positive regulation of muscle cell apoptotic process	5	1	0.21	0.11684	gene1206：TIGAR，1206：up
Molecular Function	GO:0019871	sodium channel inhibitor activity	2	0	0.08	0.11712	--
Molecular Function	GO:0050816	phosphothreonine residue binding	2	0	0.08	0.11712	--
Biological Process	GO:1990090	cellular response to nerve growth factor stimulus	3	0	0.13	0.11719	--
Biological Process	GO:1990089	response to nerve growth factor	3	0	0.13	0.11719	--
Biological Process	GO:0048895	lateral line nerve glial cell differentiation	4	1	0.17	0.11732	gene12741：FOXD2，12741：down
Biological Process	GO:0048937	lateral line nerve glial cell development	4	1	0.17	0.11732	gene12741：FOXD2，12741：down
Molecular Function	GO:0031489	myosin V binding	2	0	0.08	0.11741	--
Biological Process	GO:0048813	dendrite morphogenesis	28	2	1.18	0.11757	gene16919：CIT，16919：down|gene19414：EPHB2，19414：down
Biological Process	GO:0030049	muscle filament sliding	6	1	0.25	0.11763	gene14852：TNNC1，14852：up
Biological Process	GO:0086001	cardiac muscle cell action potential	12	2	0.51	0.11765	Gallus_gallus_newGene_24651：LOC102114762，24651：up|gene17903：KCNJ2，17903：down
Biological Process	GO:0021954	central nervous system neuron development	41	2	1.73	0.11782	gene19414：EPHB2，19414：down|gene1950：ARX，1950：down
Biological Process	GO:0070588	calcium ion transmembrane transport	49	2	2.07	0.11786	gene14698：JPH3，14698：up|gene14699：JPH3，14699：up
Biological Process	GO:0006526	arginine biosynthetic process	4	0	0.17	0.11789	--
Biological Process	GO:0002443	leukocyte mediated immunity	99	0	4.17	0.11793	--
Molecular Function	GO:0016638	oxidoreductase activity, acting on the CH-NH2 group of donors	9	1	0.36	0.11793	gene6684：DDO，6684：up
Biological Process	GO:0050772	positive regulation of axonogenesis	17	0	0.72	0.11816	--
Biological Process	GO:0043304	regulation of mast cell degranulation	8	0	0.34	0.1184	--
Biological Process	GO:0071827	plasma lipoprotein particle organization	15	0	0.63	0.1184	--
Biological Process	GO:0009651	response to salt stress	7	0	0.3	0.11844	--
Biological Process	GO:1902532	negative regulation of intracellular signal transduction	137	7	5.78	0.1185	gene12279：RGS2，12279：down|gene13174：ADIPOQ，13174：down|gene13225：SERPINE2，13225：down|gene16746：MAPKAPK5，16746：up|gene19194：TP73，19194：up|gene19390：MFN2，19390：up|gene3483：CRHR2，3483：up
Biological Process	GO:0009145	purine nucleoside triphosphate biosynthetic process	40	1	1.69	0.11859	gene16416：NME3，16416：up
Biological Process	GO:0009206	purine ribonucleoside triphosphate biosynthetic process	40	1	1.69	0.11859	gene16416：NME3，16416：up
Biological Process	GO:0021766	hippocampus development	31	3	1.31	0.11886	gene11236：EMX2，11236：down|gene19194：TP73，19194：up|gene8406：EPHA5，8406：down
Biological Process	GO:0070935	3'-UTR-mediated mRNA stabilization	6	0	0.25	0.11889	--
Biological Process	GO:0030837	negative regulation of actin filament polymerization	16	2	0.67	0.11901	gene3776：SCIN，3776：down|gene954：MTPN，954：down
Molecular Function	GO:0016289	CoA hydrolase activity	8	0	0.32	0.11903	--
Cellular Component	GO:0005844	polysome	17	1	0.67	0.11907	gene16908：MSI1，16908：up
Molecular Function	GO:0043024	ribosomal small subunit binding	5	0	0.2	0.11909	--
Molecular Function	GO:0016769	transferase activity, transferring nitrogenous groups	18	2	0.72	0.11922	gene1067：BCAT1，1067：up|gene16320：ABAT，16320：up
Biological Process	GO:0032663	regulation of interleukin-2 production	17	0	0.72	0.11942	--
Molecular Function	GO:0004540	ribonuclease activity	38	0	1.52	0.11952	--
Biological Process	GO:0021855	hypothalamus cell migration	2	1	0.08	0.11954	gene8492：PITX2，8492：down
Cellular Component	GO:0031514	motile cilium	12	1	0.47	0.11991	gene17386：AK1，17386：up
Biological Process	GO:0001982	baroreceptor response to decreased systemic arterial blood pressure	2	1	0.08	0.11995	gene15528：ADRA1B，15528：down
Biological Process	GO:0031331	positive regulation of cellular catabolic process	68	3	2.87	0.11995	gene13829：FBXO22，13829：up|gene15528：ADRA1B，15528：down|gene20951：TFEB，20951：up
Biological Process	GO:0006812	cation transport	349	15	14.72	0.12012	Gallus_gallus_newGene_24651：LOC102114762，24651：up|Gallus_gallus_newGene_6113：ND5，6113：up|gene12027：STEAP3，12027：up|gene13225：SERPINE2，13225：down|gene14698：JPH3，14698：up|gene14699：JPH3，14699：up|gene15705：CAMK2A，15705：down|gene17903：KCNJ2，17903：down|gene19185：KCNAB2，19185：down|gene373|gene402：SLC38A2，402：down|gene6269：KCNK1，6269：up|gene6874：KCNQ5，6874：up|gene7663：FHL1，7663：down|gene9888：SLC8A3，9888…
Cellular Component	GO:0008622	epsilon DNA polymerase complex	3	0	0.12	0.1202	--
Biological Process	GO:0051821	dissemination or transmission of organism from other organism involved in symbiotic interaction	2	0	0.08	0.12044	--
Biological Process	GO:0019089	transmission of virus	2	0	0.08	0.12044	--
Biological Process	GO:0044007	dissemination or transmission of symbiont from host	2	0	0.08	0.12044	--
Biological Process	GO:0044111	development involved in symbiotic interaction	2	0	0.08	0.12044	--
Biological Process	GO:0010768	negative regulation of transcription from RNA polymerase II promoter in response to UV-induced DNA damage	2	0	0.08	0.12044	--
Biological Process	GO:2001106	regulation of Rho guanyl-nucleotide exchange factor activity	2	0	0.08	0.12076	--
Molecular Function	GO:0005502	11-cis retinal binding	2	0	0.08	0.12078	--
Biological Process	GO:0019884	antigen processing and presentation of exogenous antigen	13	0	0.55	0.12102	--
Biological Process	GO:0009132	nucleoside diphosphate metabolic process	13	2	0.55	0.12117	gene17386：AK1，17386：up|gene25346：NUDT18，25346：up
Biological Process	GO:0060413	atrial septum morphogenesis	10	1	0.42	0.12119	gene4085：TBX20，4085：down
Cellular Component	GO:0044306	neuron projection terminus	14	1	0.55	0.12138	gene14627：CDH8，14627：up
Biological Process	GO:0000052	citrulline metabolic process	4	0	0.17	0.12156	--
Biological Process	GO:0071025	RNA surveillance	6	0	0.25	0.12161	--
Biological Process	GO:0090504	epiboly	11	0	0.46	0.12196	--
Molecular Function	GO:0004127	cytidylate kinase activity	3	0	0.12	0.12205	--
Biological Process	GO:0007346	regulation of mitotic cell cycle	141	5	5.95	0.12259	gene14694：FBXO31，14694：up|gene16853：KLHL22，16853：up|gene7663：FHL1，7663：down|gene9599：HRAS，9599：down|gene9602：HRAS，9602：down
Biological Process	GO:1902600	hydrogen ion transmembrane transport	40	1	1.69	0.12283	Gallus_gallus_newGene_6113：ND5，6113：up
Molecular Function	GO:0019798	procollagen-proline dioxygenase activity	4	0	0.16	0.12286	--
Biological Process	GO:0006911	phagocytosis, engulfment	10	3	0.42	0.12292	gene11474：GULP1，11474：down|gene186|gene3070：CD36，3070：down
Biological Process	GO:1903076	regulation of protein localization to plasma membrane	16	0	0.67	0.12295	--
Biological Process	GO:0090003	regulation of protein localization to plasma membrane	16	0	0.67	0.12295	--
Biological Process	GO:0051303	establishment of chromosome localization	16	1	0.67	0.1231	gene16249：NDE1，16249：up
Biological Process	GO:0032272	negative regulation of protein polymerization	22	3	0.93	0.12315	gene17721：TBCD，17721：up|gene3776：SCIN，3776：down|gene954：MTPN，954：down
Biological Process	GO:0070192	chromosome organization involved in meiotic cell cycle	19	0	0.8	0.12315	--
Biological Process	GO:0035561	regulation of chromatin binding	5	0	0.21	0.12334	--
Biological Process	GO:0051701	interaction with host	18	1	0.76	0.12369	gene17515：RXRA，17515：up
Biological Process	GO:0048562	embryonic organ morphogenesis	174	13	7.34	0.12386	gene10879 ：ZNF503，10879：down|gene12338：PMX1，12338：down|gene13290：ZIC1，13290：down|gene13603：CLRN1，13603：up|gene1374：TBX15，1374：down|gene19557：ZNF703，19557：down|gene3532：INSIG1，3532：up|gene3864：，HOXA73864：up|gene3865：HOXA5，3865：up|gene3866：HOXA6，3866：up|gene4085：TBX20，4085：down|gene4802：SOX17，4802：down|gene8492：PITX2，8492：down
Biological Process	GO:0006706	steroid catabolic process	6	0	0.25	0.12409	--
Molecular Function	GO:0004721	phosphoprotein phosphatase activity	109	4	4.36	0.12431	gene19548：DUSP26，19548：down|gene6074：PLB1，6074：down|gene6898：PTP4A1，6898：up|gene8588：MTMR7，8588：up
Biological Process	GO:0006816	calcium ion transport	125	4	5.27	0.12442	gene14698：JPH3，14698：up|gene14699：JPH3，14699：up|gene15705：CAMK2A，15705：down|gene9888：SLC8A3，9888：down
Molecular Function	GO:0004968	gonadotropin-releasing hormone receptor activity	2	0	0.08	0.12452	--
Biological Process	GO:0046902	regulation of mitochondrial membrane permeability	10	0	0.42	0.12455	--
Biological Process	GO:0090269	fibroblast growth factor production	3	0	0.13	0.12459	--
Biological Process	GO:0090270	regulation of fibroblast growth factor production	3	0	0.13	0.12459	--
Biological Process	GO:0002697	regulation of immune effector process	102	3	4.3	0.12483	gene186|gene3070：CD36，3070：down|gene8061：IL15，8061：down
Cellular Component	GO:0097149	centralspindlin complex	2	0	0.08	0.12485	--
Molecular Function	GO:0016972	thiol oxidase activity	3	0	0.12	0.12488	--
Biological Process	GO:0045070	positive regulation of viral genome replication	5	0	0.21	0.12489	--
Molecular Function	GO:0004450	isocitrate dehydrogenase (NADP+) activity	2	0	0.08	0.12499	--
Molecular Function	GO:0046624	sphingolipid transporter activity	3	0	0.12	0.12513	--
Cellular Component	GO:0031968	organelle outer membrane	44	1	1.73	0.12534	gene19390：MFN2，19390：up
Biological Process	GO:0032535	regulation of cellular component size	108	5	4.55	0.12549	gene14973：SEMA3F，14973：down|gene19194：TP73，19194：up|gene3776：SCIN，3776：down|gene5849：TTL，gene5849：up|gene954：MTPN，954：down
Molecular Function	GO:0008430	selenium binding	10	0	0.4	0.1255	--
Cellular Component	GO:0033391	chromatoid body	9	0	0.35	0.12551	--
Molecular Function	GO:0034987	immunoglobulin receptor binding	2	0	0.08	0.12569	--
Molecular Function	GO:0004536	deoxyribonuclease activity	24	0	0.96	0.12573	--
Biological Process	GO:0010591	regulation of lamellipodium assembly	9	1	0.38	0.12575	gene13603：CLRN1，13603：up
Biological Process	GO:0007354	zygotic determination of anterior/posterior axis, embryo	2	0	0.08	0.12582	--
Biological Process	GO:0032898	neurotrophin production	2	1	0.08	0.12582	gene14238：FURIN，14238：up
Biological Process	GO:0032902	nerve growth factor production	2	1	0.08	0.12582	gene14238：FURIN，14238：up
Biological Process	GO:0006220	pyrimidine nucleotide metabolic process	31	1	1.31	0.1259	gene16416：NME3，16416：up
Biological Process	GO:1902808	positive regulation of cell cycle G1/S phase transition	7	0	0.3	0.12599	--
Biological Process	GO:0006626	protein targeting to mitochondrion	20	1	0.84	0.12611	gene19390：MFN2，19390：up
Molecular Function	GO:0090482	vitamin transmembrane transporter activity	4	0	0.16	0.12625	--
Biological Process	GO:0031163	metallo-sulfur cluster assembly	9	0	0.38	0.12629	--
Biological Process	GO:0016226	iron-sulfur cluster assembly	9	0	0.38	0.12629	--
Cellular Component	GO:0031090	organelle membrane	855	26	33.54	0.12629	Gallus_gallus_newGene_24723：LOC106899679，24723：up|Gallus_gallus_newGene_6113：ND5，6113：up|gene11095：RRP12，11095：up|gene11190：GPAM，11190：down|gene1284：VAMP1，1284：up|gene14077：SIAT8B，14077：down|gene14452：AMFR，14452：up|gene14698：JPH3，14698：up|gene14699：JPH3，14699：up|gene15528：ADRA1B，15528：down|gene16628：NOC4L，16628：down|gene19390：MFN2，19390：up|gene22036：LOC104915967，22036：down|gene23265：CKMT2，23265：u…
Molecular Function	GO:0016794	diphosphoric monoester hydrolase activity	2	0	0.08	0.12654	--
Molecular Function	GO:0008893	guanosine-3',5'-bis(diphosphate) 3'-diphosphatase activity	2	0	0.08	0.12654	--
Molecular Function	GO:0017016	Ras GTPase binding	57	1	2.28	0.12662	gene4246：RANBP9，4246：up
Molecular Function	GO:0000156	phosphorelay response regulator activity	2	0	0.08	0.1267	--
Biological Process	GO:0070988	demethylation	19	2	0.8	0.12671	gene16135：ALKBH5，gene16135：up|gene17754：JMJD6，17754：up
Biological Process	GO:0048207	vesicle targeting, rough ER to cis-Golgi	5	0	0.21	0.12689	--
Biological Process	GO:0048208	COPII vesicle coating	5	0	0.21	0.12689	--
Molecular Function	GO:0035241	protein-arginine omega-N monomethyltransferase activity	2	0	0.08	0.12702	--
Biological Process	GO:0051180	vitamin transport	15	0	0.63	0.12712	--
Biological Process	GO:0016125	sterol metabolic process	55	2	2.32	0.12738	gene3532：INSIG1，3532：up|gene7147：EPHX2，7147：down
Cellular Component	GO:0031974	membrane-enclosed lumen	935	21	36.67	0.1274	Gallus_gallus_newGene_16404：UBR4，16404：up|Gallus_gallus_newGene_47：LOC110391435，47：up|gene11095：RRP12，11095：up|gene11985：EAF2，1985：up|gene12338：PMX1，12338：down|gene1374：TBX15，1374：down|gene15774：PITX1，15774：down|gene16135：ALKBH5，gene16135：up|gene16628：NOC4L，16628：down|gene17515：RXRA，17515：up|gene17735：NARF，17735：up|gene17754：JMJD6，17754：up|gene19557：ZNF703，19557：down|gene21157：RDM1，21157：down|gen…
Molecular Function	GO:0019829	cation-transporting ATPase activity	54	0	2.16	0.12752	--
Molecular Function	GO:0042625	ATPase coupled ion transmembrane transporter activity	54	0	2.16	0.12752	--
Biological Process	GO:0060575	intestinal epithelial cell differentiation	8	1	0.34	0.12784	gene3865：HOXA5，3865：up
Biological Process	GO:0042311	vasodilation	29	1	1.22	0.12842	gene12279：RGS2，12279：down
Biological Process	GO:0032460	negative regulation of protein oligomerization	4	0	0.17	0.12843	--
Biological Process	GO:0032463	negative regulation of protein homooligomerization	4	0	0.17	0.12843	--
Cellular Component	GO:0005891	voltage-gated calcium channel complex	16	0	0.63	0.12851	--
Biological Process	GO:0021697	cerebellar cortex formation	12	0	0.51	0.12853	--
Biological Process	GO:0010832	negative regulation of myotube differentiation	3	0	0.13	0.1286	--
Cellular Component	GO:0000346	transcription export complex	8	0	0.31	0.12861	--
Molecular Function	GO:0008378	galactosyltransferase activity	14	0	0.56	0.12862	--
Biological Process	GO:0008152	metabolic process	5587	253	235.6	0.12884	Gallus_gallus_newGene_16404：UBR4，16404：up|Gallus_gallus_newGene_18494：LOC109365375，18494：up|Gallus_gallus_newGene_20049：TPI1，20049：up|Gallus_gallus_newGene_2075：AS27_14818，2075：up|Gallus_gallus_newGene_21022：ALPK3，21022：up|Gallus_gallus_newGene_21069：PHKB，21069：up|Gallus_gallus_newGene_21552：N339_04974，21552：up|Gallus_gallus_newGene_23546：GYS1，23546：up|Gallus_gallus_newGene_24723：LOC106899679，247…
Biological Process	GO:0050715	positive regulation of cytokine secretion	24	0	1.01	0.12887	--
Biological Process	GO:0002074	extraocular skeletal muscle development	4	1	0.17	0.12891	gene8492：PITX2，8492：down
Cellular Component	GO:0005816	spindle pole body	2	0	0.08	0.12904	--
Biological Process	GO:0006102	isocitrate metabolic process	2	0	0.08	0.12905	--
Molecular Function	GO:0015377	cation:chloride symporter activity	7	0	0.28	0.12916	--
Biological Process	GO:0007063	regulation of sister chromatid cohesion	8	0	0.34	0.12938	--
Biological Process	GO:0048892	lateral line nerve development	5	1	0.21	0.1294	gene12741：FOXD2，12741：down
Molecular Function	GO:0008553	hydrogen-exporting ATPase activity, phosphorylative mechanism	2	0	0.08	0.12955	--
Molecular Function	GO:0004497	monooxygenase activity	73	1	2.92	0.12973	gene9508：TPH1，9508：up
Biological Process	GO:0015936	coenzyme A metabolic process	12	0	0.51	0.13008	--
Molecular Function	GO:0004857	enzyme inhibitor activity	133	9	5.32	0.13012	gene13225：SERPINE2，13225：down|gene13306：PPP1R2，13306：up|gene14238：FURIN，14238：up|gene17961：TIMP2，17961：down|gene20767：CDKN1A，20767：up|gene25762：PPP1R37，25762：up|gene4933：PI15，4933：down|gene6864：CD109，6864：down|gene855：TIMP3，855：down
Molecular Function	GO:0031210	phosphatidylcholine binding	8	0	0.32	0.13065	--
Biological Process	GO:0019098	reproductive behavior	12	1	0.51	0.13071	gene13225：SERPINE2，13225：down
Molecular Function	GO:0052689	carboxylic ester hydrolase activity	58	1	2.32	0.13074	gene18315：PROCA1，18315：up
Biological Process	GO:0070889	platelet alpha granule organization	2	0	0.08	0.13077	--
Biological Process	GO:0032418	lysosome localization	2	0	0.08	0.13077	--
Biological Process	GO:0030148	sphingolipid biosynthetic process	26	1	1.1	0.13078	gene14077：SIAT8B，14077：down
Biological Process	GO:0019511	peptidyl-proline hydroxylation	5	1	0.21	0.13104	gene10010：EGLN3，10010：up
Biological Process	GO:0043117	positive regulation of vascular permeability	3	0	0.13	0.13106	--
Biological Process	GO:0043985	histone H4-R3 methylation	2	0	0.08	0.13147	--
Molecular Function	GO:0035925	mRNA 3'-UTR AU-rich region binding	3	0	0.12	0.13173	--
Molecular Function	GO:0030144	alpha-1,6-mannosylglycoprotein 6-beta-N-acetylglucosaminyltransferase activity	3	0	0.12	0.13205	--
Molecular Function	GO:0001665	alpha-N-acetylgalactosaminide alpha-2,6-sialyltransferase activity	3	0	0.12	0.13225	--
Biological Process	GO:0071763	nuclear membrane organization	6	0	0.25	0.13268	--
Molecular Function	GO:0000975	regulatory region DNA binding	221	10	8.84	0.13279	gene11236：EMX2，11236：down|gene11500：ERBB4，11500：up|gene1374：TBX15，1374：down|gene17515：RXRA，17515：up|gene19194：TP73，19194：up|gene20078：BARX2，20078：down|gene3533：EN2，3533：down|gene4085：TBX20，4085：down|gene5570：EN2，5570：down|gene8492：PITX2，8492：down
Molecular Function	GO:0001067	regulatory region nucleic acid binding	221	10	8.84	0.13279	gene11236：EMX2，11236：down|gene11500：ERBB4，11500：up|gene1374：TBX15，1374：down|gene17515：RXRA，17515：up|gene19194：TP73，19194：up|gene20078：BARX2，20078：down|gene3533：EN2，3533：down|gene4085：TBX20，4085：down|gene5570：EN2，5570：down|gene8492：PITX2，8492：down
Biological Process	GO:1901988	negative regulation of cell cycle phase transition	58	5	2.45	0.1328	gene14694：FBXO31，14694：up|gene16853：KLHL22，16853：up|gene7663：FHL1，7663：down|gene9599：HRAS，9599：down|gene9602：HRAS，9602：down
Biological Process	GO:1903313	positive regulation of mRNA metabolic process	15	0	0.63	0.13284	--
Biological Process	GO:0050685	positive regulation of mRNA processing	15	0	0.63	0.13284	--
Molecular Function	GO:0035515	oxidative RNA demethylase activity	2	1	0.08	0.13285	gene16135：ALKBH5，gene16135：up
Biological Process	GO:0090197	positive regulation of chemokine secretion	3	0	0.13	0.13295	--
Biological Process	GO:0097193	intrinsic apoptotic signaling pathway	67	6	2.83	0.13306	gene11724：ZNF385B，11724：down|gene12303：CRIP1，12303：down|gene21200：PDK2，21200：down|gene24885：PDK2，24885：down|gene9599：HRAS，9599：down|gene9602：HRAS，9602：down
Biological Process	GO:0010586	miRNA metabolic process	13	2	0.55	0.13318	gene9599：HRAS，9599：down|gene9602：HRAS，9602：down
Biological Process	GO:0021894	cerebral cortex GABAergic interneuron development	5	1	0.21	0.13331	gene1950：ARX，1950：down
Biological Process	GO:0021853	cerebral cortex GABAergic interneuron migration	5	1	0.21	0.13331	gene1950：ARX，1950：down
Biological Process	GO:0021830	interneuron migration from the subpallium to the cortex	5	1	0.21	0.13331	gene1950：ARX，1950：down
Molecular Function	GO:0051018	protein kinase A binding	5	0	0.2	0.13342	--
Biological Process	GO:0002831	regulation of response to biotic stimulus	21	1	0.89	0.13343	gene8061：IL15，8061：down
Molecular Function	GO:0004519	endonuclease activity	48	0	1.92	0.13366	--
Biological Process	GO:0032780	negative regulation of ATPase activity	5	0	0.21	0.13375	--
Biological Process	GO:0030853	negative regulation of granulocyte differentiation	4	1	0.17	0.13383	gene13174：ADIPOQ，13174：down
Biological Process	GO:0046500	S-adenosylmethionine metabolic process	6	1	0.25	0.13395	gene10692：MAT1A，10692：up
Molecular Function	GO:0004314	[acyl-carrier-protein] S-malonyltransferase activity	3	0	0.12	0.13425	--
Molecular Function	GO:0016420	malonyltransferase activity	3	0	0.12	0.13425	--
Molecular Function	GO:0016419	S-malonyltransferase activity	3	0	0.12	0.13425	--
Molecular Function	GO:0033829	O-fucosylpeptide 3-beta-N-acetylglucosaminyltransferase activity	3	0	0.12	0.13445	--
Molecular Function	GO:0008061	chitin binding	5	0	0.2	0.13445	--
Molecular Function	GO:0044323	retinoic acid-responsive element binding	2	1	0.08	0.13448	gene17515：RXRA，17515：up
Biological Process	GO:0035914	skeletal muscle cell differentiation	28	2	1.18	0.13461	gene24320：NR4A1，24320：up|gene8898：ATOH8，8898：down
Cellular Component	GO:0034706	sodium channel complex	11	1	0.43	0.13471	Gallus_gallus_newGene_24651：LOC102114762，24651：up
Biological Process	GO:0090150	establishment of protein localization to membrane	72	0	3.04	0.13491	--
Biological Process	GO:0032412	regulation of ion transmembrane transporter activity	44	3	1.86	0.13504	gene14698：JPH3，14698：up|gene14699：JPH3，14699：up|gene7663：FHL1，7663：down
Biological Process	GO:0070059	intrinsic apoptotic signaling pathway in response to endoplasmic reticulum stress	13	0	0.55	0.13508	--
Biological Process	GO:0043650	dicarboxylic acid biosynthetic process	8	0	0.34	0.13515	--
Biological Process	GO:0032286	central nervous system myelin maintenance	2	0	0.08	0.13516	--
Biological Process	GO:0032972	regulation of muscle filament sliding speed	1	1	0.04	0.13556	gene14852：TNNC1，14852：up
Biological Process	GO:0055073	cadmium ion homeostasis	2	0	0.08	0.13561	--
Biological Process	GO:0032392	DNA geometric change	19	1	0.8	0.13562	gene7037：DDX1，7037：up
Biological Process	GO:0032508	DNA duplex unwinding	19	1	0.8	0.13562	gene7037：DDX1，7037：up
Biological Process	GO:0051446	positive regulation of meiotic cell cycle	3	0	0.13	0.13569	--
Biological Process	GO:1901993	regulation of meiotic cell cycle phase transition	3	0	0.13	0.13569	--
Biological Process	GO:1901994	negative regulation of meiotic cell cycle phase transition	3	0	0.13	0.13569	--
Molecular Function	GO:0008173	RNA methyltransferase activity	15	0	0.6	0.13582	--
Cellular Component	GO:0044449	contractile fiber part	88	6	3.45	0.13589	gene10995：ACTA2，10995：down|gene14852：TNNC1，14852：up|gene1974：SMPX，1974：down|gene19848：FHL3，19848：down|gene453：CPM，453：down1|gene8461：MYOZ2，8461：down
Molecular Function	GO:0008353	RNA polymerase II carboxy-terminal domain kinase activity	8	0	0.32	0.13603	--
Biological Process	GO:0031175	neuron projection development	267	21	11.26	0.13605	Gallus_gallus_newGene_24651：LOC102114762，24651：up|gene10986：CXCL12，10986：down|gene12741：FOXD2，12741：down|gene14973：SEMA3F，14973：down|gene153|gene15491：SLIT3，15491：down|gene16919：CIT，16919：down|gene19344：NBL1，19344：down|gene19414：EPHB2，19414：down|gene1950：ARX，1950：down|gene21407：CNTNAP1，21407：down|gene25417：ALDOA，25417：up|gene2823：PAK1，2823：down|gene2920：GDPD5，2920：down|gene3533：EN2，3533：down|gene…
Biological Process	GO:0019363	pyridine nucleotide biosynthetic process	11	1	0.46	0.13606	gene226
Molecular Function	GO:0015662	ATPase activity, coupled to transmembrane movement of ions, phosphorylative mechanism	18	0	0.72	0.13632	--
Molecular Function	GO:0004579	dolichyl-diphosphooligosaccharide-protein glycotransferase activity	5	0	0.2	0.1364	--
Biological Process	GO:0001966	thigmotaxis	1	1	0.04	0.13657	gene25417：ALDOA，25417：up
Biological Process	GO:0031282	regulation of guanylate cyclase activity	5	0	0.21	0.13668	--
Biological Process	GO:0051205	protein insertion into membrane	6	0	0.25	0.13672	--
Molecular Function	GO:0043426	MRF binding	4	0	0.16	0.13674	--
Molecular Function	GO:0005042	netrin receptor activity	1	1	0.04	0.13689	gene8507：UNC5C，8507：down
Molecular Function	GO:0004743	pyruvate kinase activity	1	1	0.04	0.137	gene1374：TBX15，1374：down|gene13746：PKM，13746：up
Biological Process	GO:0090110	cargo loading into COPII-coated vesicle	1	1	0.04	0.13707	gene3532：INSIG1，3532：up
Biological Process	GO:1901301	regulation of cargo loading into COPII-coated vesicle	1	1	0.04	0.13707	gene3532：INSIG1，3532：up
Biological Process	GO:1901303	negative regulation of cargo loading into COPII-coated vesicle	1	1	0.04	0.13707	gene3532：INSIG1，3532：up
Biological Process	GO:0035459	cargo loading into vesicle	1	1	0.04	0.13707	gene3532：INSIG1，3532：up
Biological Process	GO:0033564	anterior/posterior axon guidance	3	1	0.13	0.13708	gene8507：UNC5C，8507：down
Biological Process	GO:0007409	axonogenesis	160	12	6.75	0.13741	gene10986：CXCL12，10986：down|gene12741：FOXD2，12741：down|gene14973：SEMA3F，14973：down|gene15491：SLIT3，15491：down|gene19414：EPHB2，19414：down|gene1950：ARX，1950：down|gene25417：ALDOA，25417：up|gene3533：EN2，3533：down|gene5570：EN2，5570：down|gene5849：TTL，gene5849：up|gene8406：EPHA5，8406：down|gene8507：UNC5C，8507：down
Biological Process	GO:0045598	regulation of fat cell differentiation	38	2	1.6	0.13741	gene13174：ADIPOQ，13174：down|gene3532：INSIG1，3532：up
Molecular Function	GO:0004835	tubulin-tyrosine ligase activity	1	1	0.04	0.13741	gene5849：TTL，gene5849：up
Biological Process	GO:0035553	oxidative single-stranded RNA demethylation	2	1	0.08	0.13749	gene16135：ALKBH5，gene16135：up
Biological Process	GO:0035513	oxidative RNA demethylation	2	1	0.08	0.13749	gene16135：ALKBH5，gene16135：up
Biological Process	GO:0042245	RNA repair	2	0	0.08	0.13749	--
Biological Process	GO:0072595	maintenance of protein localization in organelle	11	0	0.46	0.13752	--
Molecular Function	GO:0047280	nicotinamide phosphoribosyltransferase activity	1	1	0.04	0.13753	gene226
Molecular Function	GO:0004514	nicotinate-nucleotide diphosphorylase (carboxylating) activity	1	1	0.04	0.13753	gene226
Molecular Function	GO:0004082	bisphosphoglycerate mutase activity	1	1	0.04	0.13771	gene11094：PGAM1，11094：up
Molecular Function	GO:0004083	bisphosphoglycerate 2-phosphatase activity	1	1	0.04	0.13771	gene11094：PGAM1，11094：up
Biological Process	GO:0014741	negative regulation of muscle hypertrophy	4	1	0.17	0.13774	gene12279：RGS2，12279：down
Biological Process	GO:0010614	negative regulation of cardiac muscle hypertrophy	4	1	0.17	0.13774	gene12279：RGS2，12279：down
Molecular Function	GO:0004347	glucose-6-phosphate isomerase activity	1	1	0.04	0.13777	gene14592：GPI，14592：up
Molecular Function	GO:0008022	protein C-terminus binding	65	4	2.6	0.13791	gene21795：HOMER3，21795：up|gene23869：PFKM，23869：up|gene9599：HRAS，9599：down|gene9602：HRAS，9602：down
Molecular Function	GO:0004618	phosphoglycerate kinase activity	1	1	0.04	0.13795	gene7816：PGK，7816：up
Biological Process	GO:0006754	ATP biosynthetic process	29	0	1.22	0.13816	--
Biological Process	GO:0002703	regulation of leukocyte mediated immunity	60	0	2.53	0.1382	--
Molecular Function	GO:0008967	phosphoglycolate phosphatase activity	1	1	0.04	0.13824	gene16202：PGP，16202：up
Biological Process	GO:0043149	stress fiber assembly	20	1	0.84	0.13845	gene2823：PAK1，2823：down
Biological Process	GO:0019048	modulation by virus of host morphology or physiology	7	1	0.3	0.13851	gene17515：RXRA，17515：up
Molecular Function	GO:0019776	Atg8 ligase activity	2	0	0.08	0.13854	--
Molecular Function	GO:0019777	Atg12 transferase activity	2	0	0.08	0.13854	--
Molecular Function	GO:0030272	5-formyltetrahydrofolate cyclo-ligase activity	2	0	0.08	0.13879	--
Biological Process	GO:0035510	DNA dealkylation	8	0	0.34	0.13892	--
Molecular Function	GO:0004332	fructose-bisphosphate aldolase activity	4	2	0.16	0.13898	Gallus_gallus_newGene_25321：LOC104917114，25321：up|gene25417：ALDOA，25417：up
Biological Process	GO:0031076	embryonic camera-type eye development	29	3	1.22	0.13899	gene10879 ：ZNF503，10879：down|gene19557：ZNF703，19557：down|gene8492：PITX2，8492：down
Molecular Function	GO:0015922	aspartate oxidase activity	1	1	0.04	0.13907	gene6684：DDO，6684：up
Molecular Function	GO:0008445	D-aspartate oxidase activity	1	1	0.04	0.13907	gene6684：DDO，6684：up
Molecular Function	GO:0045118	azole transporter activity	2	0	0.08	0.13921	--
Molecular Function	GO:0015403	thiamine uptake transmembrane transporter activity	2	0	0.08	0.13921	--
Molecular Function	GO:1901474	azole transmembrane transporter activity	2	0	0.08	0.13921	--
Molecular Function	GO:0015234	thiamine transmembrane transporter activity	2	0	0.08	0.13921	--
Molecular Function	GO:0015563	uptake transmembrane transporter activity	2	0	0.08	0.13921	--
Biological Process	GO:0010800	positive regulation of peptidyl-threonine phosphorylation	7	0	0.3	0.13936	--
Biological Process	GO:0000423	mitophagy	1	1	0.04	0.1395	gene1206：TIGAR，1206：up
Biological Process	GO:0010663	positive regulation of striated muscle cell apoptotic process	1	1	0.04	0.1395	gene1206：TIGAR，1206：up
Biological Process	GO:0010666	positive regulation of cardiac muscle cell apoptotic process	1	1	0.04	0.1395	gene1206：TIGAR，1206：up
Biological Process	GO:1903147	negative regulation of autophagy of mitochondrion	1	1	0.04	0.1395	gene1206：TIGAR，1206：up
Biological Process	GO:1901524	regulation of mitophagy	1	1	0.04	0.1395	gene1206：TIGAR，1206：up
Biological Process	GO:1901525	negative regulation of mitophagy	1	1	0.04	0.1395	gene1206：TIGAR，1206：up
Biological Process	GO:0031344	regulation of cell projection organization	132	12	5.57	0.13955	gene13603：CLRN1，13603：up|gene14973：SEMA3F，14973：down|gene153|gene16919：CIT，16919：down|gene17915：CDC42EP4，17915：down|gene19414：EPHB2，19414：down|gene373|gene5849：TTL，gene5849：up|gene6062：RHOQ，6062：up|gene7634：FRMD7，7634：up|gene9599：HRAS，9599：down|gene9602：HRAS，9602：down
Biological Process	GO:0036293	response to decreased oxygen levels	70	2	2.95	0.13961	gene10010：EGLN3，10010：up|gene16135：ALKBH5，gene16135：up
Biological Process	GO:0001666	response to hypoxia	70	2	2.95	0.13961	gene10010：EGLN3，10010：up|gene16135：ALKBH5，gene16135：up
Cellular Component	GO:0032144	4-aminobutyrate transaminase complex	1	1	0.04	0.13994	gene16320：ABAT，16320：up
Molecular Function	GO:0008486	diphosphoinositol-polyphosphate diphosphatase activity	1	1	0.04	0.13997	gene20921：NUDT3，20921：up
Biological Process	GO:0046133	pyrimidine ribonucleoside catabolic process	4	0	0.17	0.14005	--
Molecular Function	GO:0047730	carnosine synthase activity	1	1	0.04	0.14014	gene22325：CARNS1，22325：up
Biological Process	GO:0071543	diphosphoinositol polyphosphate metabolic process	1	1	0.04	0.14028	gene20921：NUDT3，20921：up
Biological Process	GO:0071544	diphosphoinositol polyphosphate catabolic process	1	1	0.04	0.14028	gene20921：NUDT3，20921：up
Molecular Function	GO:0008239	dipeptidyl-peptidase activity	2	0	0.08	0.14048	--
Molecular Function	GO:0003867	4-aminobutyrate transaminase activity	1	1	0.04	0.1405	gene16320：ABAT，16320：up
Biological Process	GO:0034341	response to interferon-gamma	21	1	0.89	0.14053	gene4734：AQP4，4734：up
Biological Process	GO:0035498	carnosine metabolic process	1	1	0.04	0.14053	gene22325：CARNS1，22325：up
Biological Process	GO:0035499	carnosine biosynthetic process	1	1	0.04	0.14053	gene22325：CARNS1，22325：up
Molecular Function	GO:0004348	glucosylceramidase activity	3	0	0.12	0.14054	--
Biological Process	GO:0002237	response to molecule of bacterial origin	84	3	3.54	0.14062	gene186|gene20242：IL18，20242：down|gene3070：CD36，3070：down
Biological Process	GO:0032814	regulation of natural killer cell activation	9	2	0.38	0.14073	gene20242：IL18，20242：down|gene8061：IL15，8061：down
Molecular Function	GO:0047150	betaine-homocysteine S-methyltransferase activity	1	1	0.04	0.14086	gene22733：BHMT，22733：up
Molecular Function	GO:0030553	cGMP binding	8	0	0.32	0.14089	--
Biological Process	GO:2000812	regulation of barbed-end actin filament capping	1	1	0.04	0.14099	gene954：MTPN，954：down
Biological Process	GO:0019318	hexose metabolic process	106	14	4.47	0.1413	Gallus_gallus_newGene_20049：TPI1，20049：up|gene11094：PGAM1，11094：up|gene1312：TPI1，1312：up|gene13174：ADIPOQ，13174：down|gene13305：APOD，13305：up|gene14592：GPI，14592：up|gene15528：ADRA1B，15528：down|gene17803：DCXR，17803：down|gene21200：PDK2，21200：down|gene24885：PDK2，24885：down|gene25858：ENO3，25858：up|gene3742：PDK4，3742：down|gene3877：HIBADH，3877：up|gene7816：PGK，7816：up
Biological Process	GO:0009956	radial pattern formation	1	1	0.04	0.14131	gene14094：NR2F2，14094：down
Biological Process	GO:0008343	adult feeding behavior	8	0	0.34	0.14148	--
Molecular Function	GO:0008428	ribonuclease inhibitor activity	3	0	0.12	0.14179	--
Biological Process	GO:0071709	membrane assembly	4	0	0.17	0.14187	--
Biological Process	GO:2000463	positive regulation of excitatory postsynaptic potential	4	0	0.17	0.14187	--
Biological Process	GO:0045838	positive regulation of membrane potential	4	0	0.17	0.14187	--
Biological Process	GO:0001941	postsynaptic membrane organization	4	0	0.17	0.14187	--
Molecular Function	GO:0004152	dihydroorotate dehydrogenase activity	2	0	0.08	0.14192	--
Molecular Function	GO:0004158	dihydroorotate oxidase activity	2	0	0.08	0.14192	--
Biological Process	GO:0097178	ruffle assembly	8	2	0.34	0.14226	gene9599：HRAS，9599：down|gene9602：HRAS，9602：down
Biological Process	GO:0021772	olfactory bulb development	15	2	0.63	0.14228	gene11500：ERBB4，11500：up|gene1950：ARX，1950：down
Biological Process	GO:0021988	olfactory lobe development	15	2	0.63	0.14228	gene11500：ERBB4，11500：up|gene1950：ARX，1950：down
Molecular Function	GO:0004735	pyrroline-5-carboxylate reductase activity	3	0	0.12	0.14235	--
Biological Process	GO:0071044	histone mRNA catabolic process	4	0	0.17	0.14239	--
Biological Process	GO:0075733	intracellular transport of virus	8	0	0.34	0.14259	--
Biological Process	GO:0046794	transport of virus	8	0	0.34	0.14259	--
Biological Process	GO:1902583	multi-organism intracellular transport	8	0	0.34	0.14259	--
Biological Process	GO:0044766	multi-organism transport	8	0	0.34	0.14259	--
Molecular Function	GO:0008119	thiopurine S-methyltransferase activity	1	1	0.04	0.14279	gene4241：TPMT，4241：up
Biological Process	GO:0060528	secretory columnal luminar epithelial cell differentiation involved in prostate glandular acinus development	1	1	0.04	0.14294	gene17515：RXRA，17515：up
Biological Process	GO:0036306	embryonic heart tube elongation	1	1	0.04	0.14301	gene4085：TBX20，4085：down
Biological Process	GO:0070899	mitochondrial tRNA wobble uridine modification	1	1	0.04	0.14314	gene6871：MTO1，6871：up
Biological Process	GO:0070900	mitochondrial tRNA modification	1	1	0.04	0.14314	gene6871：MTO1，6871：up
Biological Process	GO:1900864	mitochondrial RNA modification	1	1	0.04	0.14314	gene6871：MTO1，6871：up
Molecular Function	GO:0032427	GBD domain binding	1	1	0.04	0.14316	gene6062：RHOQ，6062：up
Biological Process	GO:2001235	positive regulation of apoptotic signaling pathway	17	0	0.72	0.14324	--
Molecular Function	GO:0019209	kinase activator activity	24	1	0.96	0.14324	gene17820：TOM1，17820：down
Biological Process	GO:0033869	nucleoside bisphosphate catabolic process	2	0	0.08	0.14334	--
Biological Process	GO:0034031	ribonucleoside bisphosphate catabolic process	2	0	0.08	0.14334	--
Biological Process	GO:0034034	purine nucleoside bisphosphate catabolic process	2	0	0.08	0.14334	--
Biological Process	GO:0015938	coenzyme A catabolic process	2	0	0.08	0.14334	--
Biological Process	GO:0034502	protein localization to chromosome	20	0	0.84	0.14335	--
Biological Process	GO:0045926	negative regulation of growth	93	7	3.92	0.14351	gene11985：EAF2，1985：up|gene13225：SERPINE2，13225：down|gene14973：SEMA3F，14973：down|gene15491：SLIT3，15491：down|gene186|gene3070：CD36，3070：down|gene7663：FHL1，7663：down
Biological Process	GO:0060390	regulation of SMAD protein import into nucleus	6	0	0.25	0.14358	--
Molecular Function	GO:0004842	ubiquitin-protein transferase activity	171	9	6.84	0.14365	Gallus_gallus_newGene_16404：UBR4，16404：up|gene10936：FBXL15，10936：up|gene11805：UBR3，11805：up|gene1282：FBXO40，1282：up|gene14452：AMFR，14452：up|gene15184：ARIH2，15184：up|gene3743：ASB4，3743：up|gene3916：UBE2E2，3916：down|gene4981：WWP1，4981：up
Biological Process	GO:0002250	adaptive immune response	99	1	4.17	0.14382	gene20242：IL18，20242：down
Molecular Function	GO:0031698	beta-2 adrenergic receptor binding	3	0	0.12	0.14382	--
Molecular Function	GO:0004462	lactoylglutathione lyase activity	1	1	0.04	0.14389	gene6106：GLO1，6106：up
Biological Process	GO:0043653	mitochondrial fragmentation involved in apoptotic process	2	0	0.08	0.1439	--
Molecular Function	GO:0008670	2,4-dienoyl-CoA reductase (NADPH) activity	1	1	0.04	0.14407	gene4993：DECR1，4993：down
Molecular Function	GO:0003950	NAD+ ADP-ribosyltransferase activity	14	0	0.56	0.14418	--
Cellular Component	GO:0042645	mitochondrial nucleoid	18	0	0.71	0.14419	--
Molecular Function	GO:0080084	5S rDNA binding	3	0	0.12	0.1442	--
Molecular Function	GO:0001016	RNA polymerase III regulatory region DNA binding	3	0	0.12	0.1442	--
Molecular Function	GO:0001030	RNA polymerase III type 1 promoter DNA binding	3	0	0.12	0.1442	--
Molecular Function	GO:0001031	RNA polymerase III type 2 promoter DNA binding	3	0	0.12	0.1442	--
Molecular Function	GO:0001032	RNA polymerase III type 3 promoter DNA binding	3	0	0.12	0.1442	--
Biological Process	GO:0090131	mesenchyme migration	2	0	0.08	0.14427	--
Biological Process	GO:0048369	lateral mesoderm morphogenesis	2	0	0.08	0.14427	--
Biological Process	GO:0048370	lateral mesoderm formation	2	0	0.08	0.14427	--
Biological Process	GO:0048371	lateral mesodermal cell differentiation	2	0	0.08	0.14427	--
Biological Process	GO:0035993	deltoid tuberosity development	1	1	0.04	0.14432	gene8492：PITX2，8492：down
Biological Process	GO:0060460	left lung morphogenesis	1	1	0.04	0.14432	gene8492：PITX2，8492：down
Biological Process	GO:0061055	myotome development	1	1	0.04	0.14432	gene8492：PITX2，8492：down
Biological Process	GO:2000290	regulation of myotome development	1	1	0.04	0.14432	gene8492：PITX2，8492：down
Biological Process	GO:2000287	positive regulation of myotome development	1	1	0.04	0.14432	gene8492：PITX2，8492：down
Biological Process	GO:0021763	subthalamic nucleus development	1	1	0.04	0.14432	gene8492：PITX2，8492：down
Biological Process	GO:0060578	superior vena cava morphogenesis	1	1	0.04	0.14432	gene8492：PITX2，8492：down
Biological Process	GO:0018198	peptidyl-cysteine modification	7	0	0.3	0.14441	--
Molecular Function	GO:0016813	hydrolase activity, acting on carbon-nitrogen (but not peptide) bonds, in linear amidines	7	0	0.28	0.14454	--
Biological Process	GO:0032094	response to food	13	0	0.55	0.14459	--
Biological Process	GO:0032651	regulation of interleukin-1 beta production	13	0	0.55	0.14459	--
Molecular Function	GO:0061630	ubiquitin protein ligase activity	11	0	0.44	0.14472	--
Molecular Function	GO:0008035	high-density lipoprotein particle binding	4	2	0.16	0.14477	gene186|gene3070：CD36，3070：down
Biological Process	GO:0042094	interleukin-2 biosynthetic process	13	0	0.55	0.14486	--
Molecular Function	GO:0030158	protein xylosyltransferase activity	3	0	0.12	0.14498	--
Biological Process	GO:0010883	regulation of lipid storage	16	2	0.67	0.14516	gene186|gene3070：CD36，3070：down
Molecular Function	GO:0004591	oxoglutarate dehydrogenase (succinyl-transferring) activity	2	0	0.08	0.14519	--
Molecular Function	GO:0004470	malic enzyme activity	1	1	0.04	0.14529	gene6823：ME1，6823：up
Molecular Function	GO:0004473	malate dehydrogenase (decarboxylating) (NADP+) activity	1	1	0.04	0.14529	gene6823：ME1，6823：up
Biological Process	GO:0009991	response to extracellular stimulus	88	5	3.71	0.1453	gene1206：TIGAR，1206：up|gene13829：FBXO22，13829：up|gene21200：PDK2，21200：down|gene24885：PDK2，24885：down|gene3742：PDK4，3742：down
Molecular Function	GO:0016831	carboxy-lyase activity	24	1	0.96	0.14544	gene3942：GADL1，3942：up
Biological Process	GO:0010884	positive regulation of lipid storage	7	2	0.3	0.14548	gene186|gene3070：CD36，3070：down
Biological Process	GO:0070339	response to bacterial lipopeptide	4	2	0.17	0.14555	gene186|gene3070：CD36，3070：down
Biological Process	GO:0071220	cellular response to bacterial lipoprotein	4	2	0.17	0.14555	gene186|gene3070：CD36，3070：down
Biological Process	GO:0071221	cellular response to bacterial lipopeptide	4	2	0.17	0.14555	gene186|gene3070：CD36，3070：down
Biological Process	GO:0044539	long-chain fatty acid import	4	2	0.17	0.14555	gene186|gene3070：CD36，3070：down
Biological Process	GO:0010744	positive regulation of macrophage derived foam cell differentiation	4	2	0.17	0.14555	gene186|gene3070：CD36，3070：down
Biological Process	GO:0010886	positive regulation of cholesterol storage	4	2	0.17	0.14555	gene186|gene3070：CD36，3070：down
Biological Process	GO:0010742	macrophage derived foam cell differentiation	12	3	0.51	0.14556	gene13174：ADIPOQ，13174：down|gene186|gene3070：CD36，3070：down
Biological Process	GO:0010743	regulation of macrophage derived foam cell differentiation	12	3	0.51	0.14556	gene13174：ADIPOQ，13174：down|gene186|gene3070：CD36，3070：down
Biological Process	GO:0090077	foam cell differentiation	12	3	0.51	0.14556	gene13174：ADIPOQ，13174：down|gene186|gene3070：CD36，3070：down
Biological Process	GO:0032308	positive regulation of prostaglandin secretion	4	0	0.17	0.14568	--
Biological Process	GO:0035622	intrahepatic bile duct development	3	0	0.13	0.14575	--
Biological Process	GO:0061009	common bile duct development	3	0	0.13	0.14575	--
Biological Process	GO:2000098	negative regulation of smooth muscle cell-matrix adhesion	1	1	0.04	0.14598	gene13305：APOD，13305：up
Biological Process	GO:1900016	negative regulation of cytokine production involved in inflammatory response	1	1	0.04	0.14598	gene13305：APOD，13305：up
Biological Process	GO:2000402	negative regulation of lymphocyte migration	1	1	0.04	0.14598	gene13305：APOD，13305：up
Biological Process	GO:2000405	negative regulation of T cell migration	1	1	0.04	0.14598	gene13305：APOD，13305：up
Biological Process	GO:0071638	negative regulation of monocyte chemotactic protein-1 production	1	1	0.04	0.14598	gene13305：APOD，13305：up
Biological Process	GO:0060587	regulation of lipoprotein lipid oxidation	1	1	0.04	0.14598	gene13305：APOD，13305：up
Biological Process	GO:0060588	negative regulation of lipoprotein lipid oxidation	1	1	0.04	0.14598	gene13305：APOD，13305：up
Biological Process	GO:0034439	lipoprotein lipid oxidation	1	1	0.04	0.14598	gene13305：APOD，13305：up
Molecular Function	GO:0047453	ATP-dependent NAD(P)H-hydrate dehydratase activity	1	1	0.04	0.14609	gene2259：NAXD，2259：up
Cellular Component	GO:0001750	photoreceptor outer segment	15	1	0.59	0.1461	gene24189：OPN1LW，24189：down
Biological Process	GO:0060452	positive regulation of cardiac muscle contraction	1	1	0.04	0.14618	gene12279：RGS2，12279：down
Cellular Component	GO:0071920	cleavage body	1	1	0.04	0.1463	gene7037：DDX1，7037：up
Biological Process	GO:0048812	neuron projection morphogenesis	186	15	7.84	0.14634	gene10986：CXCL12，10986：down|gene12741：FOXD2，12741：down|gene14973：SEMA3F，14973：down|gene15491：SLIT3，15491：down|gene16919：CIT，16919：down|gene19344：NBL1，19344：down|gene19414：EPHB2，19414：down|gene1950：ARX，1950：down|gene21407：CNTNAP1，21407：down|gene25417：ALDOA，25417：up|gene3533：EN2，3533：down|gene5570：EN2，5570：down|gene5849：TTL，gene5849：up|gene8406：EPHA5，8406：down|gene8507：UNC5C，8507：down
Biological Process	GO:0018195	peptidyl-arginine modification	7	0	0.3	0.14647	--
Cellular Component	GO:0019008	molybdopterin synthase complex	1	1	0.04	0.14649	gene6090：MOCS1，6090：up
Molecular Function	GO:0031685	adenosine receptor binding	2	0	0.08	0.14659	--
Cellular Component	GO:0005771	multivesicular body	8	1	0.31	0.1466	gene12027：STEAP3，12027：up
Biological Process	GO:0046184	aldehyde biosynthetic process	7	1	0.3	0.14667	Gallus_gallus_newGene_20049：TPI1，20049：up
Biological Process	GO:2000645	negative regulation of receptor catabolic process	1	1	0.04	0.14671	gene14238：FURIN，14238：up
Biological Process	GO:1903363	negative regulation of cellular protein catabolic process	1	1	0.04	0.14671	gene14238：FURIN，14238：up
Biological Process	GO:0032804	negative regulation of low-density lipoprotein particle receptor catabolic process	1	1	0.04	0.14671	gene14238：FURIN，14238：up
Biological Process	GO:1901018	positive regulation of potassium ion transmembrane transporter activity	3	0	0.13	0.14683	--
Biological Process	GO:1901381	positive regulation of potassium ion transmembrane transport	3	0	0.13	0.14683	--
Biological Process	GO:0006883	cellular sodium ion homeostasis	3	0	0.13	0.14683	--
Molecular Function	GO:0033677	DNA/RNA helicase activity	1	1	0.04	0.14684	gene7037：DDX1，7037：up
Molecular Function	GO:0008442	3-hydroxyisobutyrate dehydrogenase activity	1	1	0.04	0.14696	gene3877：HIBADH，3877：up
Molecular Function	GO:0016748	succinyltransferase activity	2	0	0.08	0.14702	--
Molecular Function	GO:0016749	N-succinyltransferase activity	2	0	0.08	0.14702	--
Molecular Function	GO:0003870	5-aminolevulinate synthase activity	2	0	0.08	0.14702	--
Cellular Component	GO:0014069	postsynaptic density of dendrite	21	1	0.82	0.14705	gene21795：HOMER3，21795：up
Molecular Function	GO:0005053	peroxisome matrix targeting signal-2 binding	1	1	0.04	0.14721	gene6510：PEX7，6510：up
Molecular Function	GO:0015280	ligand-gated sodium channel activity	6	0	0.24	0.14724	--
Molecular Function	GO:0033746	histone demethylase activity (H3-R2 specific)	1	1	0.04	0.14727	gene17754：JMJD6，17754：up
Molecular Function	GO:0033749	histone demethylase activity (H4-R3 specific)	1	1	0.04	0.14727	gene17754：JMJD6，17754：up
Biological Process	GO:0016101	diterpenoid metabolic process	19	1	0.8	0.14756	gene22950：ALDH1A1，22950：up
Cellular Component	GO:0031227	intrinsic component of endoplasmic reticulum membrane	56	3	2.2	0.14783	Gallus_gallus_newGene_24723：LOC106899679，24723：up|gene14452：AMFR，14452：up|gene3532：INSIG1，3532：up
Cellular Component	GO:0034703	cation channel complex	65	3	2.55	0.14797	Gallus_gallus_newGene_24651：LOC102114762，24651：up|gene21407：CNTNAP1，21407：down|gene6874：KCNQ5，6874：up
Biological Process	GO:2000364	regulation of STAT protein import into nucleus	1	1	0.04	0.14805	gene11500：ERBB4，11500：up
Biological Process	GO:2000366	positive regulation of STAT protein import into nucleus	1	1	0.04	0.14805	gene11500：ERBB4，11500：up
Biological Process	GO:0061026	cardiac muscle tissue regeneration	1	1	0.04	0.14805	gene11500：ERBB4，11500：up
Biological Process	GO:0034381	plasma lipoprotein particle clearance	8	3	0.34	0.14822	gene13174：ADIPOQ，13174：down|gene186|gene3070：CD36，3070：down
Biological Process	GO:0043268	positive regulation of potassium ion transport	6	1	0.25	0.14825	gene7663：FHL1，7663：down
Cellular Component	GO:0043083	synaptic cleft	1	1	0.04	0.14831	gene14627：CDH8，14627：up
Biological Process	GO:0018395	peptidyl-lysine hydroxylation to 5-hydroxy-L-lysine	1	1	0.04	0.14839	gene17754：JMJD6，17754：up
Biological Process	GO:0017185	peptidyl-lysine hydroxylation	1	1	0.04	0.14839	gene17754：JMJD6，17754：up
Biological Process	GO:0070077	histone arginine demethylation	1	1	0.04	0.14839	gene17754：JMJD6，17754：up
Biological Process	GO:0070078	histone H3-R2 demethylation	1	1	0.04	0.14839	gene17754：JMJD6，17754：up
Biological Process	GO:0070079	histone H4-R3 demethylation	1	1	0.04	0.14839	gene17754：JMJD6，17754：up
Biological Process	GO:0071375	cellular response to peptide hormone stimulus	61	7	2.57	0.14848	gene13174：ADIPOQ，13174：down|gene17966：SOCS3，17966：down|gene21200：PDK2，21200：down|gene24885：PDK2，24885：down|gene3483：CRHR2，3483：up|gene3742：PDK4，3742：down|gene6062：RHOQ，6062：up
Biological Process	GO:1901653	cellular response to peptide	61	7	2.57	0.14848	gene13174：ADIPOQ，13174：down|gene17966：SOCS3，17966：down|gene21200：PDK2，21200：down|gene24885：PDK2，24885：down|gene3483：CRHR2，3483：up|gene3742：PDK4，3742：down|gene6062：RHOQ，6062：up
Biological Process	GO:0018146	keratan sulfate biosynthetic process	2	0	0.08	0.14861	--
Biological Process	GO:0048213	Golgi vesicle prefusion complex stabilization	2	0	0.08	0.1488	--
Molecular Function	GO:0016864	intramolecular oxidoreductase activity, transposing S-S bonds	8	0	0.32	0.14904	--
Molecular Function	GO:0003756	protein disulfide isomerase activity	8	0	0.32	0.14904	--
Molecular Function	GO:0016653	oxidoreductase activity, acting on NAD(P)H, heme protein as acceptor	9	0	0.36	0.1491	--
Biological Process	GO:0006507	GPI anchor release	1	1	0.04	0.14913	gene17809：NOTUM，17809：up
Biological Process	GO:1900037	regulation of cellular response to hypoxia	3	0	0.13	0.14916	--
Biological Process	GO:1900038	negative regulation of cellular response to hypoxia	3	0	0.13	0.14916	--
Biological Process	GO:0032074	negative regulation of nuclease activity	3	0	0.13	0.14916	--
Biological Process	GO:0006532	aspartate biosynthetic process	2	0	0.08	0.14918	--
Biological Process	GO:0006538	glutamate catabolic process	2	0	0.08	0.14918	--
Biological Process	GO:0019550	glutamate catabolic process to aspartate	2	0	0.08	0.14918	--
Biological Process	GO:0019551	glutamate catabolic process to 2-oxoglutarate	2	0	0.08	0.14918	--
Biological Process	GO:0006107	oxaloacetate metabolic process	2	0	0.08	0.14918	--
Cellular Component	GO:0031673	H zone	3	0	0.12	0.14923	--
Molecular Function	GO:0050115	myosin-light-chain-phosphatase activity	1	1	0.04	0.14933	gene6074：PLB1，6074：down
Biological Process	GO:0002702	positive regulation of production of molecular mediator of immune response	17	2	0.72	0.14957	gene186|gene3070：CD36，3070：down
Biological Process	GO:0002902	regulation of B cell apoptotic process	11	0	0.46	0.14959	--
Biological Process	GO:1901575	organic substance catabolic process	932	63	39.3	0.14969	Gallus_gallus_newGene_16404：UBR4，16404：up|Gallus_gallus_newGene_20049：TPI1，20049：up|Gallus_gallus_newGene_25030：PYGM，25030：up|Gallus_gallus_newGene_25321：LOC104917114，25321：up|gene1029：BPGM，1029：up|gene1037：RERG，1037：down|gene1067：BCAT1，1067：up|gene1084：LDHB，1084：down|gene10936：FBXL15，10936：up|gene10995：ACTA2，10995：down|gene11094：PGAM1，11094：up|gene11805：UBR3，11805：up|gene12279：RGS2，12279：down|ge…
Biological Process	GO:0060042	retina morphogenesis in camera-type eye	33	1	1.39	0.1499	gene13290：ZIC1，13290：down
Molecular Function	GO:0050664	oxidoreductase activity, acting on NAD(P)H, oxygen as acceptor	6	0	0.24	0.1499	--
Biological Process	GO:0042073	intraciliary transport	5	0	0.21	0.14991	--
Cellular Component	GO:0005768	endosome	227	5	8.9	0.14993	gene12027：STEAP3，12027：up|gene17820：TOM1，17820：down|gene6269：KCNK1，6269：up|gene8590：VPS37A，8590：up|gene9515：TSG101，9515：up：TSG101，9515：up
Biological Process	GO:0034350	regulation of glial cell apoptotic process	2	0	0.08	0.14995	--
Biological Process	GO:0034351	negative regulation of glial cell apoptotic process	2	0	0.08	0.14995	--
Biological Process	GO:0034250	positive regulation of cellular amide metabolic process	2	0	0.08	0.14995	--
Cellular Component	GO:0001520	outer dense fiber	1	1	0.04	0.15022	gene17386：AK1，17386：up
Biological Process	GO:0042117	monocyte activation	2	0	0.08	0.15024	--
Molecular Function	GO:0008172	S-methyltransferase activity	4	2	0.16	0.15049	gene22733：BHMT，22733：up|gene4241：TPMT，4241：up
Biological Process	GO:0032970	regulation of actin filament-based process	116	7	4.89	0.15069	gene14852：TNNC1，14852：up|gene2823：PAK1，2823：down|gene3776：SCIN，3776：down|gene8406：EPHA5，8406：down|gene954：MTPN，954：down|gene9599：HRAS，9599：down|gene9602：HRAS，9602：down
Cellular Component	GO:0070775	H3 histone acetyltransferase complex	4	0	0.16	0.15072	--
Cellular Component	GO:0070776	MOZ/MORF histone acetyltransferase complex	4	0	0.16	0.15072	--
Biological Process	GO:0009298	GDP-mannose biosynthetic process	2	0	0.08	0.15081	--
Biological Process	GO:0014036	neural crest cell fate specification	1	1	0.04	0.1509	gene12356：PBX1，12356：up
Biological Process	GO:0048794	swim bladder development	1	1	0.04	0.1509	gene12356：PBX1，12356：up
Biological Process	GO:0048795	swim bladder morphogenesis	1	1	0.04	0.1509	gene12356：PBX1，12356：up
Biological Process	GO:0010766	negative regulation of sodium ion transport	3	1	0.13	0.151	gene13225：SERPINE2，13225：down
Cellular Component	GO:0000922	spindle pole	45	2	1.77	0.15107	gene16249：NDE1，16249：up|gene16853：KLHL22，16853：up
Biological Process	GO:0090027	negative regulation of monocyte chemotaxis	1	1	0.04	0.15117	gene19344：NBL1，19344：down
Molecular Function	GO:0001158	enhancer sequence-specific DNA binding	19	0	0.76	0.15117	--
Biological Process	GO:0031446	regulation of fast-twitch skeletal muscle fiber contraction	3	0	0.13	0.15151	--
Biological Process	GO:0031448	positive regulation of fast-twitch skeletal muscle fiber contraction	3	0	0.13	0.15151	--
Biological Process	GO:0014724	regulation of twitch skeletal muscle contraction	3	0	0.13	0.15151	--
Biological Process	GO:0043277	apoptotic cell clearance	14	3	0.59	0.15156	gene17754：JMJD6，17754：up|gene186|gene3070：CD36，3070：down
Biological Process	GO:0016480	negative regulation of transcription from RNA polymerase III promoter	3	0	0.13	0.15187	--
Biological Process	GO:0051294	establishment of spindle orientation	8	1	0.34	0.15187	gene16249：NDE1，16249：up
Biological Process	GO:0046394	carboxylic acid biosynthetic process	153	8	6.45	0.15206	Gallus_gallus_newGene_24723：LOC106899679，24723：up|gene1067：BCAT1，1067：up|gene10692：MAT1A，10692：up|gene15663：FAXDC2，15663：down|gene22325：CARNS1，22325：up|gene22733：BHMT，22733：up|gene3532：INSIG1，3532：up|gene3742：PDK4，3742：down
Biological Process	GO:0016053	organic acid biosynthetic process	153	8	6.45	0.15206	Gallus_gallus_newGene_24723：LOC106899679，24723：up|gene1067：BCAT1，1067：up|gene10692：MAT1A，10692：up|gene15663：FAXDC2，15663：down|gene22325：CARNS1，22325：up|gene22733：BHMT，22733：up|gene3532：INSIG1，3532：up|gene3742：PDK4，3742：down
Biological Process	GO:0035790	platelet-derived growth factor receptor-alpha signaling pathway	1	1	0.04	0.15213	gene13174：ADIPOQ，13174：down
Biological Process	GO:0070994	detection of oxidative stress	1	1	0.04	0.15213	gene13174：ADIPOQ，13174：down
Biological Process	GO:2000477	regulation of metanephric glomerular visceral epithelial cell development	1	1	0.04	0.15213	gene13174：ADIPOQ，13174：down
Biological Process	GO:2000478	positive regulation of metanephric glomerular visceral epithelial cell development	1	1	0.04	0.15213	gene13174：ADIPOQ，13174：down
Biological Process	GO:2000590	negative regulation of metanephric mesenchymal cell migration	1	1	0.04	0.15213	gene13174：ADIPOQ，13174：down
Biological Process	GO:2000583	regulation of platelet-derived growth factor receptor-alpha signaling pathway	1	1	0.04	0.15213	gene13174：ADIPOQ，13174：down
Biological Process	GO:2000584	negative regulation of platelet-derived growth factor receptor-alpha signaling pathway	1	1	0.04	0.15213	gene13174：ADIPOQ，13174：down
Biological Process	GO:2000532	regulation of renal albumin absorption	1	1	0.04	0.15213	gene13174：ADIPOQ，13174：down
Biological Process	GO:2000534	positive regulation of renal albumin absorption	1	1	0.04	0.15213	gene13174：ADIPOQ，13174：down
Biological Process	GO:0072015	glomerular visceral epithelial cell development	1	1	0.04	0.15213	gene13174：ADIPOQ，13174：down
Biological Process	GO:0072310	glomerular epithelial cell development	1	1	0.04	0.15213	gene13174：ADIPOQ，13174：down
Biological Process	GO:0072312	metanephric glomerular epithelial cell differentiation	1	1	0.04	0.15213	gene13174：ADIPOQ，13174：down
Biological Process	GO:0072313	metanephric glomerular epithelial cell development	1	1	0.04	0.15213	gene13174：ADIPOQ，13174：down
Biological Process	GO:0072244	metanephric glomerular epithelium development	1	1	0.04	0.15213	gene13174：ADIPOQ，13174：down
Biological Process	GO:0072248	metanephric glomerular visceral epithelial cell differentiation	1	1	0.04	0.15213	gene13174：ADIPOQ，13174：down
Biological Process	GO:0072249	metanephric glomerular visceral epithelial cell development	1	1	0.04	0.15213	gene13174：ADIPOQ，13174：down
Biological Process	GO:0097017	renal protein absorption	1	1	0.04	0.15213	gene13174：ADIPOQ，13174：down
Biological Process	GO:0097018	renal albumin absorption	1	1	0.04	0.15213	gene13174：ADIPOQ，13174：down
Cellular Component	GO:0030877	beta-catenin destruction complex	7	0	0.27	0.15247	--
Molecular Function	GO:0019955	cytokine binding	29	2	1.16	0.1525	gene19344：NBL1，19344：down|gene22491：CNTFR，22491：up
Biological Process	GO:0009314	response to radiation	158	5	6.66	0.15256	gene12303：CRIP1，12303：down|gene15528：ADRA1B，15528：down|gene24189：OPN1LW，24189：down|gene9599：HRAS，9599：down|gene9602：HRAS，9602：down
Biological Process	GO:0032459	regulation of protein oligomerization	10	0	0.42	0.15264	--
Biological Process	GO:1902866	regulation of retina development in camera-type eye	1	1	0.04	0.15282	gene8898：ATOH8，8898：down
Biological Process	GO:0061074	regulation of neural retina development	1	1	0.04	0.15282	gene8898：ATOH8，8898：down
Cellular Component	GO:0000932	P-body	30	0	1.18	0.15283	--
Biological Process	GO:0048286	lung alveolus development	19	2	0.8	0.15319	gene1197：PTHLH，1197：down|gene3865：HOXA5，3865：up
Biological Process	GO:0006400	tRNA modification	15	1	0.63	0.15325	gene6871：MTO1，6871：up
Molecular Function	GO:0097642	calcitonin family receptor activity	3	0	0.12	0.15333	--
Molecular Function	GO:0001635	calcitonin gene-related peptide receptor activity	3	0	0.12	0.15333	--
Biological Process	GO:1902750	negative regulation of cell cycle G2/M phase transition	3	1	0.13	0.15342	gene7663：FHL1，7663：down
Biological Process	GO:0010972	negative regulation of G2/M transition of mitotic cell cycle	3	1	0.13	0.15342	gene7663：FHL1，7663：down
Biological Process	GO:0050912	detection of chemical stimulus involved in sensory perception of taste	2	0	0.08	0.15343	--
Biological Process	GO:0001569	branching involved in blood vessel morphogenesis	24	3	1.01	0.15344	gene10986：CXCL12，10986：down|gene4085：TBX20，4085：down|gene8492：PITX2，8492：down
Biological Process	GO:0060560	developmental growth involved in morphogenesis	67	5	2.83	0.15358	gene1197：PTHLH，1197：down|gene12741：FOXD2，12741：down|gene14973：SEMA3F，14973：down|gene15491：SLIT3，15491：down|gene5849：TTL，gene5849：up
Cellular Component	GO:0031232	extrinsic component of external side of plasma membrane	1	1	0.04	0.15368	gene13225：SERPINE2，13225：down
Molecular Function	GO:0008934	inositol monophosphate 1-phosphatase activity	1	1	0.04	0.1537	gene4634：IMPA2，4634：up
Molecular Function	GO:0052834	inositol monophosphate phosphatase activity	1	1	0.04	0.1537	gene4634：IMPA2，4634：up
Molecular Function	GO:0004181	metallocarboxypeptidase activity	14	3	0.56	0.15378	gene14069：AGBL1，14069：down|gene26239：AEBP1，26239：down|gene453：CPM，453：down
Cellular Component	GO:0043220	Schmidt-Lanterman incisure	4	0	0.16	0.15391	--
Cellular Component	GO:0043218	compact myelin	4	0	0.16	0.15391	--
Biological Process	GO:0009081	branched-chain amino acid metabolic process	7	2	0.3	0.15392	gene1067：BCAT1，1067：up|gene3877：HIBADH，3877：up
Biological Process	GO:0030968	endoplasmic reticulum unfolded protein response	20	1	0.84	0.15395	gene14452：AMFR，14452：up
Biological Process	GO:0070100	negative regulation of chemokine-mediated signaling pathway	3	1	0.13	0.15409	gene15491：SLIT3，15491：down
Biological Process	GO:0070233	negative regulation of T cell apoptotic process	3	1	0.13	0.15409	gene11190：GPAM，11190：down
Biological Process	GO:0070099	regulation of chemokine-mediated signaling pathway	3	1	0.13	0.15409	gene15491：SLIT3，15491：down
Molecular Function	GO:0034594	phosphatidylinositol trisphosphate phosphatase activity	3	0	0.12	0.15411	--
Cellular Component	GO:0044425	membrane part	2678	94	105.04	0.15415	Gallus_gallus_newGene_24651：LOC102114762，24651：up|Gallus_gallus_newGene_24723：LOC106899679，24723：up|Gallus_gallus_newGene_6113：ND5，6113：up|gene1001|gene10059：SYNDIG1L，10059：down|gene10245：DLK1，10245：down|gene10757：SLC16A9，10757：up|gene10986：CXCL12，10986：down|gene11095：RRP12，11095：up|gene11167：SORCS3，11167：down|gene11500：ERBB4，11500：up|gene11523：RAMP1，11523：down|gene11768：GPR155，11768：up|gene11853…
Molecular Function	GO:0004819	glutamine-tRNA ligase activity	2	0	0.08	0.15425	--
Cellular Component	GO:0097059	CNTFR-CLCF1 complex	1	1	0.04	0.15428	gene22491：CNTFR，22491：up
Molecular Function	GO:0042165	neurotransmitter binding	4	0	0.16	0.15431	--
Molecular Function	GO:0042166	acetylcholine binding	4	0	0.16	0.15431	--
Molecular Function	GO:0047708	biotinidase activity	1	1	0.04	0.1544	gene3890：BTD，3890：down
Molecular Function	GO:0001047	core promoter binding	39	0	1.56	0.15442	--
Molecular Function	GO:0005217	intracellular ligand-gated ion channel activity	15	1	0.6	0.15478	gene9947：RYR3，9947：up
Biological Process	GO:0070482	response to oxygen levels	72	2	3.04	0.15481	gene10010：EGLN3，10010：up|gene16135：ALKBH5，gene16135：up
Molecular Function	GO:0050038	L-xylulose reductase (NADP+) activity	1	1	0.04	0.15492	gene17803：DCXR，17803：down
Molecular Function	GO:0047880	erythrulose reductase activity	1	1	0.04	0.15492	gene17803：DCXR，17803：down
Biological Process	GO:0045989	positive regulation of striated muscle contraction	6	1	0.25	0.15495	gene12279：RGS2，12279：down
Biological Process	GO:0006778	porphyrin-containing compound metabolic process	18	0	0.76	0.15501	--
Biological Process	GO:0044704	single-organism reproductive behavior	1	1	0.04	0.1551	gene13225：SERPINE2，13225：down
Biological Process	GO:0042628	mating plug formation	1	1	0.04	0.1551	gene13225：SERPINE2，13225：down
Biological Process	GO:0061107	seminal vesicle development	1	1	0.04	0.1551	gene13225：SERPINE2，13225：down
Biological Process	GO:0061108	seminal vesicle epithelium development	1	1	0.04	0.1551	gene13225：SERPINE2，13225：down
Biological Process	GO:0045297	post-mating behavior	1	1	0.04	0.1551	gene13225：SERPINE2，13225：down
Biological Process	GO:0042448	progesterone metabolic process	6	0	0.25	0.15512	--
Molecular Function	GO:0016814	hydrolase activity, acting on carbon-nitrogen (but not peptide) bonds, in cyclic amidines	23	2	0.92	0.15526	gene20891：AMPD1，gene20891：up|gene20997：AMPD1，20997：up
Biological Process	GO:0006768	biotin metabolic process	1	1	0.04	0.15531	gene3890：BTD，3890：down
Biological Process	GO:0001878	response to yeast	3	0	0.13	0.15542	--
Biological Process	GO:0031936	negative regulation of chromatin silencing	2	0	0.08	0.15569	--
Molecular Function	GO:0016918	retinal binding	6	0	0.24	0.15572	--
Biological Process	GO:0003360	brainstem development	1	1	0.04	0.15573	gene22491：CNTFR，22491：up
Molecular Function	GO:0017127	cholesterol transporter activity	5	0	0.2	0.15583	--
Biological Process	GO:0042732	D-xylose metabolic process	1	1	0.04	0.15587	gene17803：DCXR，17803：down
Molecular Function	GO:0043130	ubiquitin binding	27	0	1.08	0.15588	--
Molecular Function	GO:0005523	tropomyosin binding	11	2	0.44	0.15589	gene23405：TMOD1，23405：down|gene312：LMOD2，312：down
Molecular Function	GO:0004301	epoxide hydrolase activity	1	1	0.04	0.15601	gene7147：EPHX2，7147：down
Biological Process	GO:0003099	positive regulation of the force of heart contraction by chemical signal	1	1	0.04	0.15622	gene15528：ADRA1B，15528：down
Biological Process	GO:0005981	regulation of glycogen catabolic process	1	1	0.04	0.15622	gene15528：ADRA1B，15528：down
Biological Process	GO:0045818	negative regulation of glycogen catabolic process	1	1	0.04	0.15622	gene15528：ADRA1B，15528：down
Biological Process	GO:0045819	positive regulation of glycogen catabolic process	1	1	0.04	0.15622	gene15528：ADRA1B，15528：down
Biological Process	GO:0001996	positive regulation of heart rate by epinephrine-norepinephrine	1	1	0.04	0.15622	gene15528：ADRA1B，15528：down
Biological Process	GO:0001997	positive regulation of the force of heart contraction by epinephrine-norepinephrine	1	1	0.04	0.15622	gene15528：ADRA1B，15528：down
Biological Process	GO:0001987	vasoconstriction of artery involved in baroreceptor response to lowering of systemic arterial blood pressure	1	1	0.04	0.15622	gene15528：ADRA1B，15528：down
Biological Process	GO:0044089	positive regulation of cellular component biogenesis	18	1	0.76	0.15637	gene19414：EPHB2，19414：down
Biological Process	GO:0060157	urinary bladder development	2	0	0.08	0.15658	--
Biological Process	GO:0003344	pericardium morphogenesis	2	1	0.08	0.15658	gene4085：TBX20，4085：down
Molecular Function	GO:0005488	binding	6498	273	260.03	0.15658	Gallus_gallus_newGene_15489：CIB84_010615，15489：up|Gallus_gallus_newGene_16404：UBR4，16404：up|Gallus_gallus_newGene_18494：LOC109365375，18494：up|Gallus_gallus_newGene_20049：TPI1，20049：up|Gallus_gallus_newGene_2075：AS27_14818，2075：up|Gallus_gallus_newGene_21022：ALPK3，21022：up|Gallus_gallus_newGene_21069：PHKB，21069：up|Gallus_gallus_newGene_21552：N339_04974，21552：up|Gallus_gallus_newGene_23591：COL3A1，2…
Molecular Function	GO:0051087	chaperone binding	24	2	0.96	0.1568	gene6908：BAG2，6908：up|gene7308：BAG2，7308：up
Biological Process	GO:0060480	lung goblet cell differentiation	1	1	0.04	0.15685	gene3865：HOXA5，3865：up
Biological Process	GO:0060481	lobar bronchus epithelium development	1	1	0.04	0.15685	gene3865：HOXA5，3865：up
Biological Process	GO:0060574	intestinal epithelial cell maturation	1	1	0.04	0.15685	gene3865：HOXA5，3865：up
Biological Process	GO:0046271	phenylpropanoid catabolic process	1	1	0.04	0.15706	gene7147：EPHX2，7147：down
Biological Process	GO:0046272	stilbene catabolic process	1	1	0.04	0.15706	gene7147：EPHX2，7147：down
Biological Process	GO:0009810	stilbene metabolic process	1	1	0.04	0.15706	gene7147：EPHX2，7147：down
Biological Process	GO:0009698	phenylpropanoid metabolic process	1	1	0.04	0.15706	gene7147：EPHX2，7147：down
Biological Process	GO:0051932	synaptic transmission, GABAergic	12	2	0.51	0.15722	gene9599：HRAS，9599：down|gene9602：HRAS，9602：down
Biological Process	GO:0032228	regulation of synaptic transmission, GABAergic	12	2	0.51	0.15722	gene9599：HRAS，9599：down|gene9602：HRAS，9602：down
Molecular Function	GO:0005220	inositol 1,4,5-trisphosphate-sensitive calcium-release channel activity	2	0	0.08	0.15726	--
Biological Process	GO:0021759	globus pallidus development	1	1	0.04	0.15727	gene1950：ARX，1950：down
Biological Process	GO:0046051	UTP metabolic process	11	1	0.46	0.15729	gene16416：NME3，16416：up
Biological Process	GO:0006183	GTP biosynthetic process	11	1	0.46	0.15729	gene16416：NME3，16416：up
Biological Process	GO:0006228	UTP biosynthetic process	11	1	0.46	0.15729	gene16416：NME3，16416：up
Biological Process	GO:0034374	low-density lipoprotein particle remodeling	3	0	0.13	0.15736	--
Molecular Function	GO:0019201	nucleotide kinase activity	9	1	0.36	0.15749	gene17386：AK1，17386：up
Cellular Component	GO:0071133	alpha9-beta1 integrin-ADAM8 complex	1	1	0.04	0.15774	gene21172：ITGB3，21172：down
Biological Process	GO:0070235	regulation of activation-induced cell death of T cells	1	1	0.04	0.15776	gene11190：GPAM，11190：down
Biological Process	GO:0070236	negative regulation of activation-induced cell death of T cells	1	1	0.04	0.15776	gene11190：GPAM，11190：down
Biological Process	GO:1903050	regulation of proteolysis involved in cellular protein catabolic process	54	1	2.28	0.15791	gene13829：FBXO22，13829：up
Biological Process	GO:2000124	regulation of endocannabinoid signaling pathway	2	0	0.08	0.15837	--
Biological Process	GO:0071926	endocannabinoid signaling pathway	2	0	0.08	0.15837	--
Biological Process	GO:0038171	cannabinoid signaling pathway	2	0	0.08	0.15837	--
Molecular Function	GO:0022836	gated channel activity	201	9	8.04	0.15837	Gallus_gallus_newGene_24651：LOC102114762，24651：up|gene11853：KCNH7，11853：down|gene13219：KCNE4，13219：down|gene14698：JPH3，14698：up|gene14699：JPH3，14699：up|gene17903：KCNJ2，17903：down|gene19185：KCNAB2，19185：down|gene6874：KCNQ5，6874：up|gene9947：RYR3，9947：up
Biological Process	GO:1901566	organonitrogen compound biosynthetic process	332	14	14	0.15858	gene1067：BCAT1，1067：up|gene10692：MAT1A，10692：up|gene1197：PTHLH，1197：down|gene14077：SIAT8B，14077：down|gene14238：FURIN，14238：up|gene16416：NME3，16416：up|gene1749：GART，1749：up|gene20891：AMPD1，gene20891：up|gene20997：AMPD1，20997：up|gene22325：CARNS1，22325：up|gene226|gene22733：BHMT，22733：up|gene6090：MOCS1，6090：up|gene9508：TPH1，9508：up
Biological Process	GO:0031346	positive regulation of cell projection organization	60	7	2.53	0.15859	gene13603：CLRN1，13603：up|gene153|gene17915：CDC42EP4，17915：down|gene373|gene6062：RHOQ，6062：up|gene9599：HRAS，9599：down|gene9602：HRAS，9602：down
Biological Process	GO:0033692	cellular polysaccharide biosynthetic process	31	4	1.31	0.15861	Gallus_gallus_newGene_23546：GYS1，23546：up|gene11915：PRKAG3，11915：up|gene25911：GYS1，25911：up|gene26487：GYS1，26487：up
Biological Process	GO:0033326	cerebrospinal fluid secretion	1	1	0.04	0.15861	gene19194：TP73，19194：up
Biological Process	GO:0046855	inositol phosphate dephosphorylation	7	2	0.3	0.15868	gene4634：IMPA2，4634：up|gene8588：MTMR7，8588：up
Biological Process	GO:0046838	phosphorylated carbohydrate dephosphorylation	7	2	0.3	0.15868	gene4634：IMPA2，4634：up|gene8588：MTMR7，8588：up
Biological Process	GO:0060708	spongiotrophoblast differentiation	1	1	0.04	0.15868	gene17966：SOCS3，17966：down
Biological Process	GO:0001573	ganglioside metabolic process	7	1	0.3	0.1587	gene14077：SIAT8B，14077：down
Biological Process	GO:0048170	positive regulation of long-term neuronal synaptic plasticity	1	1	0.04	0.15882	gene19414：EPHB2，19414：down
Biological Process	GO:0060658	nipple morphogenesis	1	1	0.04	0.15896	gene1197：PTHLH，1197：down
Biological Process	GO:0060659	nipple sheath formation	1	1	0.04	0.15896	gene1197：PTHLH，1197：down
Biological Process	GO:0060618	nipple development	1	1	0.04	0.15896	gene1197：PTHLH，1197：down
Biological Process	GO:0060649	mammary gland bud elongation	1	1	0.04	0.15896	gene1197：PTHLH，1197：down
Molecular Function	GO:0035299	inositol pentakisphosphate 2-kinase activity	2	0	0.08	0.15902	--
Biological Process	GO:0015718	monocarboxylic acid transport	51	3	2.15	0.15903	gene186|gene3070：CD36，3070：down|gene6345：-，6345：up
Biological Process	GO:0000715	nucleotide-excision repair, DNA damage recognition	2	0	0.08	0.15917	--
Molecular Function	GO:0016801	hydrolase activity, acting on ether bonds	8	3	0.32	0.1592	gene35|gene6141：EPHX1L，6141：up|gene7147：EPHX2，7147：down
Biological Process	GO:0006915	apoptotic process	610	25	25.72	0.15947	gene10010：EGLN3，10010：up|gene10986：CXCL12，10986：down|gene10995：ACTA2，10995：down|gene11190：GPAM，11190：down|gene11500：ERBB4，11500：up|gene11724：ZNF385B，11724：down|gene1206：TIGAR，1206：up|gene12287：HTATIP2，12287：up|gene12303：CRIP1，12303：down|gene13174：ADIPOQ，13174：down|gene153|gene15491：SLIT3，15491：down|gene17754：JMJD6，17754：up|gene19194：TP73，19194：up|gene20846：-，20846：down|gene21200：PDK2，21200：down|g…
Biological Process	GO:0045110	intermediate filament bundle assembly	5	1	0.21	0.15967	gene20700：PKP1，20700：up
Biological Process	GO:0006425	glutaminyl-tRNA aminoacylation	2	0	0.08	0.15998	--
Cellular Component	GO:0070877	microprocessor complex	1	0	0.04	0.16007	--
Cellular Component	GO:1903095	ribonuclease III complex	1	0	0.04	0.16007	--
Biological Process	GO:0032370	positive regulation of lipid transport	17	1	0.72	0.16035	gene13174：ADIPOQ，13174：down
Biological Process	GO:0072525	pyridine-containing compound biosynthetic process	14	1	0.59	0.16037	gene226
Biological Process	GO:0000018	regulation of DNA recombination	23	0	0.97	0.16039	--
Biological Process	GO:1902882	regulation of response to oxidative stress	7	2	0.3	0.16052	gene186|gene3070：CD36，3070：down
Biological Process	GO:1900407	regulation of cellular response to oxidative stress	7	2	0.3	0.16052	gene186|gene3070：CD36，3070：down
Biological Process	GO:0043434	response to peptide hormone	70	7	2.95	0.16066	gene13174：ADIPOQ，13174：down|gene17966：SOCS3，17966：down|gene21200：PDK2，21200：down|gene24885：PDK2，24885：down|gene3483：CRHR2，3483：up|gene3742：PDK4，3742：down|gene6062：RHOQ，6062：up
Biological Process	GO:1903201	regulation of oxidative stress-induced cell death	3	0	0.13	0.16071	--
Molecular Function	GO:0036442	hydrogen-exporting ATPase activity	16	0	0.64	0.16071	--
Biological Process	GO:0046164	alcohol catabolic process	25	4	1.05	0.16088	Gallus_gallus_newGene_20049：TPI1，20049：up|gene20921：NUDT3，20921：up|gene4634：IMPA2，4634：up|gene8588：MTMR7，8588：up
Biological Process	GO:0072529	pyrimidine-containing compound catabolic process	13	2	0.55	0.16104	gene15853：DPYSL3，15853：down|gene8806：DPYSL2，8806：down
Biological Process	GO:0032429	regulation of phospholipase A2 activity	4	0	0.17	0.16114	--
Biological Process	GO:0060213	positive regulation of nuclear-transcribed mRNA poly(A) tail shortening	6	0	0.25	0.16118	--
Biological Process	GO:0061014	positive regulation of mRNA catabolic process	6	0	0.25	0.16118	--
Molecular Function	GO:0070878	primary miRNA binding	1	0	0.04	0.16119	--
Biological Process	GO:0048261	negative regulation of receptor-mediated endocytosis	3	0	0.13	0.16129	--
Biological Process	GO:1903306	negative regulation of regulated secretory pathway	3	0	0.13	0.16129	--
Biological Process	GO:0043301	negative regulation of leukocyte degranulation	3	0	0.13	0.16129	--
Biological Process	GO:0043305	negative regulation of mast cell degranulation	3	0	0.13	0.16129	--
Biological Process	GO:0001819	positive regulation of cytokine production	87	6	3.67	0.16148	gene13174：ADIPOQ，13174：down|gene17531：AGPAT2，17531：down|gene186|gene20242：IL18，20242：down|gene3070：CD36，3070：down|gene8061：IL15，8061：down
Biological Process	GO:0051924	regulation of calcium ion transport	50	2	2.11	0.16149	gene14698：JPH3，14698：up|gene14699：JPH3，14699：up
Molecular Function	GO:0004821	histidine-tRNA ligase activity	2	0	0.08	0.16154	--
Biological Process	GO:0009119	ribonucleoside metabolic process	419	22	17.67	0.16156	Gallus_gallus_newGene_6113：ND5，6113：up|gene1037：RERG，1037：down|gene10692：MAT1A，10692：up|gene10995：ACTA2，10995：down|gene12279：RGS2，12279：down|gene14852：TNNC1，14852：up|gene16077：GNA12，16077：up|gene16416：NME3，16416：up|gene17386：AK1，17386：up|gene17721：TBCD，17721：up|gene19390：MFN2，19390：up|gene20684：TUBA1C，20684：up|gene22541：TPM2，22541：down|gene3361：ABCF2，3361：up|gene5351：ABCB8，5351：down|gene6062：RHOQ…
Cellular Component	GO:0012505	endomembrane system	1237	40	48.52	0.16161	Gallus_gallus_newGene_24723：LOC106899679，24723：up|Gallus_gallus_newGene_47：LOC110391435，47：up|gene10059：SYNDIG1L，10059：down|gene11095：RRP12，11095：up|gene1197：PTHLH，1197：down|gene12027：STEAP3，12027：up|gene12287：HTATIP2，12287：up|gene13025：SLC35G2，13025：up|gene13174：ADIPOQ，13174：down|gene13225：SERPINE2，13225：down|gene14077：SIAT8B，14077：down|gene14238：FURIN，14238：up|gene14452：AMFR，14452：up|gene14675：…
Biological Process	GO:0051591	response to cAMP	3	0	0.13	0.16179	--
Biological Process	GO:0071320	cellular response to cAMP	3	0	0.13	0.16179	--
Biological Process	GO:0098655	cation transmembrane transport	149	6	6.28	0.162	Gallus_gallus_newGene_6113：ND5，6113：up|gene14698：JPH3，14698：up|gene14699：JPH3，14699：up|gene6269：KCNK1，6269：up|gene6874：KCNQ5，6874：up|gene7663：FHL1，7663：down
Biological Process	GO:0060770	negative regulation of epithelial cell proliferation involved in prostate gland development	3	1	0.13	0.16229	gene11985：EAF2，1985：up
Biological Process	GO:0007113	endomitotic cell cycle	2	0	0.08	0.16251	--
Biological Process	GO:0017182	peptidyl-diphthamide metabolic process	3	0	0.13	0.16254	--
Biological Process	GO:0017183	peptidyl-diphthamide biosynthetic process from peptidyl-histidine	3	0	0.13	0.16254	--
Biological Process	GO:0035518	histone H2A monoubiquitination	5	0	0.21	0.16302	--
Molecular Function	GO:0030371	translation repressor activity	2	0	0.08	0.16305	--
Biological Process	GO:0072593	reactive oxygen species metabolic process	59	4	2.49	0.16312	gene1206：TIGAR，1206：up|gene186|gene3070：CD36，3070：down|gene3742：PDK4，3742：down
Molecular Function	GO:0030228	lipoprotein particle receptor activity	5	2	0.2	0.16321	gene186|gene3070：CD36，3070：down
Molecular Function	GO:0002094	polyprenyltransferase activity	1	0	0.04	0.16325	--
Biological Process	GO:0086009	membrane repolarization	11	0	0.46	0.16331	--
Biological Process	GO:0009437	carnitine metabolic process	9	0	0.38	0.16334	--
Biological Process	GO:0009064	glutamine family amino acid metabolic process	42	1	1.77	0.16355	gene2537：SLC25A15，2537：down
Molecular Function	GO:0031267	small GTPase binding	59	1	2.36	0.16377	gene4246：RANBP9，4246：up
Biological Process	GO:0048704	embryonic skeletal system morphogenesis	65	5	2.74	0.16439	gene12338：PMX1，12338：down|gene1374：TBX15，1374：down|gene3864：，HOXA73864：up|gene3865：HOXA5，3865：up|gene3866：HOXA6，3866：up
Molecular Function	GO:0004595	pantetheine-phosphate adenylyltransferase activity	1	0	0.04	0.16452	--
Biological Process	GO:0019344	cysteine biosynthetic process	3	0	0.13	0.16454	--
Biological Process	GO:0046602	regulation of mitotic centrosome separation	4	0	0.17	0.1646	--
Biological Process	GO:0010767	regulation of transcription from RNA polymerase II promoter in response to UV-induced DNA damage	4	0	0.17	0.1646	--
Biological Process	GO:0032119	sequestering of zinc ion	4	0	0.17	0.16474	--
Cellular Component	GO:0005795	Golgi stack	44	2	1.73	0.16512	Gallus_gallus_newGene_47：LOC110391435，47：up|gene9871：ZFYVE1，9871：up
Molecular Function	GO:0016417	S-acyltransferase activity	7	0	0.28	0.16512	--
Molecular Function	GO:0051377	mannose-ethanolamine phosphotransferase activity	1	0	0.04	0.16513	--
Biological Process	GO:0090066	regulation of anatomical structure size	175	8	7.38	0.16525	gene12279：RGS2，12279：down|gene1289：CNP1，1289：up|gene14973：SEMA3F，14973：down|gene15528：ADRA1B，15528：down|gene19194：TP73，19194：up|gene3776：SCIN，3776：down|gene5849：TTL，gene5849：up|gene954：MTPN，954：down
Molecular Function	GO:0016668	oxidoreductase activity, acting on a sulfur group of donors, NAD(P) as acceptor	7	0	0.28	0.1653	--
Biological Process	GO:0052746	inositol phosphorylation	2	0	0.08	0.16548	--
Cellular Component	GO:0005915	zonula adherens	2	0	0.08	0.16548	--
Cellular Component	GO:0030018	Z disc	46	3	1.8	0.16558	gene19848：FHL3，19848：down|gene453：CPM，453：down1|gene8461：MYOZ2，8461：down
Biological Process	GO:0032956	regulation of actin cytoskeleton organization	102	6	4.3	0.16559	gene2823：PAK1，2823：down|gene3776：SCIN，3776：down|gene8406：EPHA5，8406：down|gene954：MTPN，954：down|gene9599：HRAS，9599：down|gene9602：HRAS，9602：down
Molecular Function	GO:0019972	interleukin-12 binding	2	0	0.08	0.16561	--
Biological Process	GO:0045834	positive regulation of lipid metabolic process	48	2	2.02	0.16567	gene11500：ERBB4，11500：up|gene13174：ADIPOQ，13174：down
Biological Process	GO:0009142	nucleoside triphosphate biosynthetic process	51	2	2.15	0.16598	gene16416：NME3，16416：up|gene17386：AK1，17386：up
Cellular Component	GO:0005790	smooth endoplasmic reticulum	6	0	0.24	0.16598	--
Molecular Function	GO:0019203	carbohydrate phosphatase activity	8	1	0.32	0.16599	gene23004：FBP2，23004：up
Molecular Function	GO:0050308	sugar-phosphatase activity	8	1	0.32	0.16599	gene23004：FBP2，23004：up
Cellular Component	GO:0044611	nuclear pore inner ring	1	0	0.04	0.16659	--
Molecular Function	GO:0004111	creatine kinase activity	6	1	0.24	0.1666	gene23265：CKMT2，23265：up
Molecular Function	GO:0042809	vitamin D receptor binding	6	1	0.24	0.16665	gene17515：RXRA，17515：up
Molecular Function	GO:0045125	bioactive lipid receptor activity	7	2	0.28	0.16673	gene23329：LPAR1,23329：down|gene23865：LPAR2，23865：down
Biological Process	GO:0060903	positive regulation of meiosis I	1	0	0.04	0.16689	--
Cellular Component	GO:0030897	HOPS complex	8	0	0.31	0.16699	--
Biological Process	GO:0050852	T cell receptor signaling pathway	25	0	1.05	0.16706	--
Biological Process	GO:0032864	activation of GTPase activity	3	0	0.13	0.1672	--
Biological Process	GO:0032506	cytokinetic process	10	0	0.42	0.16731	--
Molecular Function	GO:0019206	nucleoside kinase activity	9	0	0.36	0.16733	--
Biological Process	GO:0002021	response to dietary excess	3	0	0.13	0.16745	--
Biological Process	GO:0000380	alternative mRNA splicing, via spliceosome	7	1	0.3	0.16749	gene13590：MBNL1，13590：up
Biological Process	GO:0006998	nuclear envelope organization	16	0	0.67	0.16755	--
Biological Process	GO:0042304	regulation of fatty acid biosynthetic process	10	2	0.42	0.16759	gene3532：INSIG1，3532：up|gene3742：PDK4，3742：down
Molecular Function	GO:0055100	adiponectin binding	1	0	0.04	0.16771	--
Molecular Function	GO:0097003	adipokinetic hormone receptor activity	1	0	0.04	0.16771	--
Cellular Component	GO:0043514	interleukin-12 complex	2	0	0.08	0.1679	--
Molecular Function	GO:0023023	MHC protein complex binding	1	0	0.04	0.16791	--
Molecular Function	GO:0023026	MHC class II protein complex binding	1	0	0.04	0.16791	--
Molecular Function	GO:0031403	lithium ion binding	1	0	0.04	0.16798	--
Biological Process	GO:0002347	response to tumor cell	4	0	0.17	0.16811	--
Biological Process	GO:0002418	immune response to tumor cell	4	0	0.17	0.16811	--
Biological Process	GO:0002834	regulation of response to tumor cell	4	0	0.17	0.16811	--
Biological Process	GO:0002836	positive regulation of response to tumor cell	4	0	0.17	0.16811	--
Biological Process	GO:0002837	regulation of immune response to tumor cell	4	0	0.17	0.16811	--
Biological Process	GO:0002839	positive regulation of immune response to tumor cell	4	0	0.17	0.16811	--
Biological Process	GO:0006427	histidyl-tRNA aminoacylation	2	0	0.08	0.16818	--
Molecular Function	GO:0043021	ribonucleoprotein complex binding	37	0	1.48	0.16825	--
Molecular Function	GO:0003844	1,4-alpha-glucan branching enzyme activity	1	0	0.04	0.16859	--
Molecular Function	GO:0008466	glycogenin glucosyltransferase activity	1	0	0.04	0.16866	--
Biological Process	GO:0006970	response to osmotic stress	16	0	0.67	0.16873	--
Biological Process	GO:2000425	regulation of apoptotic cell clearance	4	0	0.17	0.16885	--
Cellular Component	GO:0097427	microtubule bundle	1	0	0.04	0.16909	--
Biological Process	GO:0000059	obsolete protein import into nucleus, docking	1	0	0.04	0.1691	--
Biological Process	GO:0051292	nuclear pore complex assembly	1	0	0.04	0.1691	--
Biological Process	GO:1902965	regulation of protein localization to early endosome	1	0	0.04	0.16918	--
Biological Process	GO:1902966	positive regulation of protein localization to early endosome	1	0	0.04	0.16918	--
Biological Process	GO:1902946	protein localization to early endosome	1	0	0.04	0.16918	--
Biological Process	GO:2000641	regulation of early endosome to late endosome transport	1	0	0.04	0.16918	--
Biological Process	GO:2000643	positive regulation of early endosome to late endosome transport	1	0	0.04	0.16918	--
Biological Process	GO:1903364	positive regulation of cellular protein catabolic process	1	0	0.04	0.16918	--
Cellular Component	GO:0070939	Dsl1/NZR complex	1	0	0.04	0.16938	--
Molecular Function	GO:0004448	isocitrate dehydrogenase activity	4	0	0.16	0.16946	--
Biological Process	GO:1903281	positive regulation of calcium:sodium antiporter activity	1	0	0.04	0.16962	--
Biological Process	GO:1903279	regulation of calcium:sodium antiporter activity	1	0	0.04	0.16962	--
Biological Process	GO:0007586	digestion	47	0	1.98	0.16975	--
Biological Process	GO:0001933	negative regulation of protein phosphorylation	101	4	4.26	0.16975	gene12279：RGS2，12279：down|gene13174：ADIPOQ，13174：down|gene14094：NR2F2，14094：down|gene19194：TP73，19194：up
Cellular Component	GO:0031074	nucleocytoplasmic transport complex	1	0	0.04	0.16989	--
Cellular Component	GO:0042565	RNA nuclear export complex	1	0	0.04	0.16989	--
Biological Process	GO:0006397	mRNA processing	142	5	5.99	0.17004	gene13590：MBNL1，13590：up|gene16135：ALKBH5，gene16135：up|gene16328：RBFOX1，16328：down|gene17754：JMJD6，17754：up|gene7037：DDX1，7037：up
Molecular Function	GO:0035254	glutamate receptor binding	3	1	0.12	0.17024	gene15705：CAMK2A，15705：down
Molecular Function	GO:0004843	thiol-dependent ubiquitin-specific protease activity	24	0	0.96	0.17026	--
[truncated: 12,132 more rows]
