# Supplementary material for: Identification of Differentially Expressed Genes in Different Types of Broiler Skeletal Muscle Fibers Using the RNA-seq Technique
Source: Biomed Res Int. 2020 Jul 4;2020:9478949. doi: 10.1155/2020/9478949 (PMC7362283; doi:10.1155/2020/9478949)
Supplement: Supplementary Materials — Table S1: primer sequences for the genes selected for qRT-PCR. Table S2: DEGs identified under certain filter criteria. Table S3: GO enrichment analysis of DEGs. Table S4: KEGG pathway analysis of DEGs. [file 9478949.f1.zip › 9478949.f1/Table S4.xlsx]

## Sheet: Sheet1
#Kegg_pathway	ko_id	Cluter_frequency	Genome_frequency	P-value	Corrected_P-value	ge
Glycolysis / Gluconeogenesis	ko00010	17 out of 230 7.39130434782609%	66 out of 5319 1.24083474337281%	1.36414e-09	1.71882e-07	Gallus_gallus_newGene_20049：TPI1，20049：up|Gallus_gallus_newGene_25321：LOC104917114，25321：up|gene1029：BPGM，1029：up|gene1084：LDHB，1084：down|gene11094：PGAM1，11094：up|gene12869：PGM1，12869：up|gene1312：TPI1，1312：up|gene13746：PKM，13746：up|gene14592：GPI，14592：up|gene16745：ALDH2，16745：up|gene23004：FBP2，23004：up|gene23869：PFKM，23869：up|gene25417：ALDOA，25417：up|gene25858：ENO3，25858：up|gene3182：LDHB，3182：dow…
Starch and sucrose metabolism	ko00500	14 out of 230 6.08695652173913%	50 out of 5319 0.940026320736981%	1.26251e-08	1.59076e-06	Gallus_gallus_newGene_23546：GYS1，23546：up|Gallus_gallus_newGene_25030：PYGM，25030：up|gene12502：AGL，12502：up|gene12869：PGM1，12869：up|gene14592：GPI，14592：up|gene1660：GBE1，1660：down|gene24244：PYGM，24244：up|gene25608：PYGM，25608：up|gene25871：PYGM，25871：up|gene25922：PYGM，25922：up|gene26487：GYS1，26487：up|gene2954：PGM2L1，2954：up|gene5739：UGP2，5739：up|gene9845：GANC，9845：up
Insulin signaling pathway	ko04910	22 out of 230 9.56521739130435%	160 out of 5319 3.00808422635834%	1.07514e-06	0.000135468	Gallus_gallus_newGene_21069：PHKB，21069：up|Gallus_gallus_newGene_23546：GYS1，23546：up|Gallus_gallus_newGene_25030：PYGM，25030：up|gene11915：PRKAG3，11915：up|gene14526：PHKB，14526：up|gene16774：ACACB，16774：down|gene16851：CRKL，16851：up|gene17966：SOCS3，17966：down|gene18765：PPP1R3D，18765：up|gene23004：FBP2，23004：up|gene24244：PYGM，24244：up|gene25608：PYGM，25608：up|gene25871：PYGM，25871：up|gene25922：PYGM，25922：u…
Biosynthesis of amino acids	ko01230	13 out of 230 5.65217391304348%	77 out of 5319 1.44764053393495%	2.05551e-05	0.00258994	Gallus_gallus_newGene_20049：TPI1，20049：up|Gallus_gallus_newGene_25321：LOC104917114，25321：up|gene1067：BCAT1，1067：up|gene10692：MAT1A，10692：up|gene11094：PGAM1，11094：up|gene12312：PHGDH，12312：down|gene1312：TPI1，1312：up|gene13746：PKM，13746：up|gene15340：ACY1，15340：up|gene23869：PFKM，23869：up|gene25417：ALDOA，25417：up|gene25858：ENO3，25858：up|gene7816：PGK，7816：up
Pyruvate metabolism	ko00620	8 out of 230 3.47826086956522%	43 out of 5319 0.808422635833803%	0.000422075	0.0531815	gene1084：LDHB，1084：down|gene13746：PKM，13746：up|gene16745：ALDH2，16745：up|gene16774：ACACB，16774：down|gene3182：LDHB，3182：down|gene6106：GLO1，6106：up|gene6823：ME1，6823：up|gene9514：LDHA，9514:up
Carbon metabolism	ko01200	14 out of 230 6.08695652173913%	117 out of 5319 2.19966159052453%	0.000464994	0.0585892	Gallus_gallus_newGene_20049：TPI1，20049：up|Gallus_gallus_newGene_25321：LOC104917114，25321：up|gene11094：PGAM1，11094：up|gene12312：PHGDH，12312：down|gene1312：TPI1，1312：up|gene13746：PKM，13746：up|gene14592：GPI，14592：up|gene16202：PGP，16202：up|gene23004：FBP2，23004：up|gene23869：PFKM，23869：up|gene25417：ALDOA，25417：up|gene25858：ENO3，25858：up|gene6823：ME1，6823：up|gene7816：PGK，7816：up
Pentose phosphate pathway	ko00030	6 out of 230 2.60869565217391%	26 out of 5319 0.48881368678323%	0.000680059	0.0856874	Gallus_gallus_newGene_25321：LOC104917114，25321：up|gene12869：PGM1，12869：up|gene14592：GPI，14592：up|gene23004：FBP2，23004：up|gene23869：PFKM，23869：up|gene25417：ALDOA，25417：up
Cysteine and methionine metabolism	ko00270	8 out of 230 3.47826086956522%	50 out of 5319 0.940026320736981%	0.00120356	0.151648	gene1067：BCAT1，1067：up|gene10692：MAT1A，10692：up|gene1084：LDHB，1084：down|gene22571：AGXT2，22571：up|gene22733：BHMT，22733：up|gene3182：LDHB，3182：down|gene35|gene9514：LDHA，9514:up
Glucagon signaling pathway	ko04922	3 out of 230 1.30434782608696%	6 out of 5319 0.112803158488438%	0.00144865	0.18253	Gallus_gallus_newGene_23546：GYS1，23546：up|Gallus_gallus_newGene_25030：PYGM，25030：up|gene25608：PYGM，25608：up
Fructose and mannose metabolism	ko00051	7 out of 230 3.04347826086957%	43 out of 5319 0.808422635833803%	0.00219365	0.2764	Gallus_gallus_newGene_20049：TPI1，20049：up|Gallus_gallus_newGene_25321：LOC104917114，25321：up|gene1206：TIGAR，1206：up|gene1312：TPI1，1312：up|gene23004：FBP2，23004：up|gene23869：PFKM，23869：up|gene25417：ALDOA，25417：up
Insulin resistance	ko04931	3 out of 230 1.30434782608696%	7 out of 5319 0.131603684903177%	0.00245445	0.309261	Gallus_gallus_newGene_23546：GYS1，23546：up|Gallus_gallus_newGene_25030：PYGM，25030：up|gene25608：PYGM，25608：up
Adipocytokine signaling pathway	ko04920	9 out of 230 3.91304347826087%	78 out of 5319 1.46644106034969%	0.00610256	0.768922	gene1001：ADIPOR2，1001：up|gene11915：PRKAG3，11915：up|gene13174：ADIPOQ，13174：down|gene15800：ACSL6，15800：up|gene16774：ACACB，16774：down|gene17515：RXRA，17515：up|gene17966：SOCS3，17966：down|gene186|gene3070：CD36，3070：down
Pentose and glucuronate interconversions	ko00040	4 out of 230 1.73913043478261%	21 out of 5319 0.394811054709532%	0.011405	1	gene16745：ALDH2，16745：up|gene17803：DCXR，17803：down|gene2651：CRYL1，2651：up|gene5739：UGP2，5739：up
Galactose metabolism	ko00052	4 out of 230 1.73913043478261%	38 out of 5319 0.714420003760105%	0.0798354	1	gene12869：PGM1，12869：up|gene23869：PFKM，23869：up|gene5739：UGP2，5739：up|gene9845：GANC，9845：up
Ascorbate and aldarate metabolism	ko00053	1 out of 230 0.434782608695652%	11 out of 5319 0.206805790562136%	0.385356	1	gene16745：ALDH2，16745：up
Fatty acid biosynthesis	ko00061	2 out of 230 0.869565217391304%	15 out of 5319 0.282007896221094%	0.135217	1	gene15800：ACSL6，15800：up|gene16774：ACACB，16774：down
Fatty acid elongation	ko00062	2 out of 230 0.869565217391304%	24 out of 5319 0.451212633953751%	0.278387	1	Gallus_gallus_newGene_24723：LOC106899679，24723：up|gene24910：TECR，24910：up
Fatty acid degradation	ko00071	3 out of 230 1.30434782608696%	43 out of 5319 0.808422635833803%	0.284224	1	gene11287：ACADSB，11287：up|gene15800：ACSL6，15800：up|gene16745：ALDH2，16745：up
Steroid biosynthesis	ko00100	1 out of 230 0.434782608695652%	20 out of 5319 0.376010528294792%	0.587574	1	gene15663：FAXDC2，15663：down
Ubiquinone and other terpenoid-quinone biosynthesis	ko00130	1 out of 230 0.434782608695652%	11 out of 5319 0.206805790562136%	0.385356	1	gene18251：VKORC1L1，18251：up
Steroid hormone biosynthesis	ko00140	1 out of 230 0.434782608695652%	34 out of 5319 0.639217898101147%	0.778586	1	gene2078：STS，2078：down
Oxidative phosphorylation	ko00190	1 out of 230 0.434782608695652%	117 out of 5319 2.19966159052453%	0.994649	1	Gallus_gallus_newGene_6113：CYTB，6113：up
Arginine biosynthesis	ko00220	2 out of 230 0.869565217391304%	21 out of 5319 0.394811054709532%	0.229551	1	gene11607：GLS，11607：up|gene15340：ACY1，15340：up
Purine metabolism	ko00230	11 out of 230 4.78260869565217%	194 out of 5319 3.64730212445948%	0.217185	1	gene12869：PGM1，12869：up|gene13746：PKM，13746：up|gene16416：NME3，16416：up|gene17265：ENTPD2，17265：down|gene17386：AK1，17386：up|gene1749：GART，1749：up|gene20891：AMPD1，20891：up|gene20997：AMPD1，20997：up|gene21821：PDE4C，21821：down|gene5857：ENTPD6，5857：up|gene6519：PDE7B，6519：up
Pyrimidine metabolism	ko00240	2 out of 230 0.869565217391304%	116 out of 5319 2.18086106410979%	0.964369	1	gene16416：NME3，16416：up|gene5857：ENTPD6，5857：up
Alanine, aspartate and glutamate metabolism	ko00250	5 out of 230 2.17391304347826%	36 out of 5319 0.676818950930626%	0.0182463	1	gene11607：GLS，11607：up|gene16320：ABAT，16320：up|gene18368：ASPA，18368：up|gene22571：AGXT2，22571：up|gene6684：DDO，6684：up
Glycine, serine and threonine metabolism	ko00260	5 out of 230 2.17391304347826%	41 out of 5319 0.770821583004324%	0.0304963	1	gene1029：BPGM，1029：up|gene11094：PGAM1，11094：up|gene12312：PHGDH，12312：down|gene22571：AGXT2，22571：up|gene22733：BHMT，22733：up
Valine, leucine and isoleucine degradation	ko00280	7 out of 230 3.04347826086957%	59 out of 5319 1.10923105846964%	0.0129466	1	gene1067：BCAT1，1067：up|gene11287：ACADSB，11287：up|gene11645：AOX1，11645：up|gene16320：ABAT，16320：up|gene16745：ALDH2，16745：up|gene22571：AGXT2，22571：up|gene3877：HIBADH，3877：up
Valine, leucine and isoleucine biosynthesis	ko00290	1 out of 230 0.434782608695652%	4 out of 5319 0.0752021056589584%	0.162109	1	gene1067：BCAT1，1067：up
Lysine degradation	ko00310	1 out of 230 0.434782608695652%	64 out of 5319 1.20323369054334%	0.941943	1	gene16745：ALDH2，16745：up
Arginine and proline metabolism	ko00330	3 out of 230 1.30434782608696%	55 out of 5319 1.03402895281068%	0.427248	1	gene16745：ALDH2，16745：up|gene22325：CARNS1，22325：up|gene23265：CKMT2，23265：up
Histidine metabolism	ko00340	3 out of 230 1.30434782608696%	26 out of 5319 0.48881368678323%	0.100003	1	gene16745：ALDH2，16745：up|gene18368：ASPA，18368：up|gene22325：CARNS1，22325：up
Tyrosine metabolism	ko00350	1 out of 230 0.434782608695652%	39 out of 5319 0.733220530174845%	0.822766	1	gene11645：AOX1，11645：up
Tryptophan metabolism	ko00380	3 out of 230 1.30434782608696%	46 out of 5319 0.864824215078022%	0.320195	1	gene11645：AOX1，11645：up|gene16745：ALDH2，16745：up|gene9508：TPH1，9508：up
beta-Alanine metabolism	ko00410	4 out of 230 1.73913043478261%	33 out of 5319 0.620417371686407%	0.0521894	1	gene16320：ABAT，16320：up|gene16745：ALDH2，16745：up|gene22325：CARNS1，22325：up|gene3942：GADL1，3942：up
Taurine and hypotaurine metabolism	ko00430	1 out of 230 0.434782608695652%	11 out of 5319 0.206805790562136%	0.385356	1	gene3942：GADL1，3942：up
D-Glutamine and D-glutamate metabolism	ko00471	1 out of 230 0.434782608695652%	2 out of 5319 0.0376010528294792%	0.0846204	1	gene11607：GLS，11607：up
Glutathione metabolism	ko00480	1 out of 230 0.434782608695652%	51 out of 5319 0.95882684715172%	0.896202	1	gene6936：GSTA3，6936：up
Mucin type O-Glycan biosynthesis	ko00512	2 out of 230 0.869565217391304%	27 out of 5319 0.50761421319797%	0.327026	1	gene18145：WBSCR17，18145：down|gene5696：GALNT14，5696：down
Amino sugar and nucleotide sugar metabolism	ko00520	3 out of 230 1.30434782608696%	53 out of 5319 0.9964278999812%	0.403811	1	gene12869：PGM1，12869：up|gene14592：GPI，14592：up|gene5739：UGP2，5739：up
Glycosaminoglycan degradation	ko00531	1 out of 230 0.434782608695652%	19 out of 5319 0.357210001880053%	0.568864	1	gene11074：HPSE2，11074：up
Glycerolipid metabolism	ko00561	3 out of 230 1.30434782608696%	62 out of 5319 1.16563263771386%	0.506347	1	gene11190：GPAM，11190：down|gene16745：ALDH2，16745：up|gene17531：AGPAT2，17531：down
Inositol phosphate metabolism	ko00562	5 out of 230 2.17391304347826%	84 out of 5319 1.57924421883813%	0.297484	1	Gallus_gallus_newGene_20049：TPI1，20049：up|gene1312：TPI1，1312：up|gene4634：IMPA2，4634：up|gene6459：SYNJ2，6459：down|gene8588：MTMR7，8588：up
Glycosylphosphatidylinositol(GPI)-anchor biosynthesis	ko00563	2 out of 230 0.869565217391304%	29 out of 5319 0.545215266027449%	0.358988	1	gene13300：PIGZ，13300：down|gene6063：PIGF，6063：up
Glycerophospholipid metabolism	ko00564	6 out of 230 2.60869565217391%	111 out of 5319 2.0868584320361%	0.347676	1	gene11190：GPAM，11190：down|gene12129：GPD2，12129：up|gene17531：AGPAT2，17531：down|gene18315：PROCA1，18315：up|gene6074：PLB1，6074：down|gene8174：ETNPPL，8174：up
Ether lipid metabolism	ko00565	3 out of 230 1.30434782608696%	56 out of 5319 1.05282947922542%	0.438847	1	gene18315：PROCA1，18315：up|gene5127：ENPP2，5127：down|gene6074：PLB1，6074：down
Arachidonic acid metabolism	ko00590	5 out of 230 2.17391304347826%	63 out of 5319 1.1844331641286%	0.135223	1	gene17276：PTGDS，17276：down|gene18315：PROCA1，18315：up|gene6074：PLB1，6074：down|gene7147：EPHX2，7147：down|gene8182：CYP2U1，8182：up
Linoleic acid metabolism	ko00591	2 out of 230 0.869565217391304%	38 out of 5319 0.714420003760105%	0.494116	1	gene18315：PROCA1，18315：up|gene6074：PLB1，6074：down
alpha-Linolenic acid metabolism	ko00592	2 out of 230 0.869565217391304%	32 out of 5319 0.601616845271668%	0.405826	1	gene18315：PROCA1，18315：up|gene6074：PLB1，6074：down
Glyoxylate and dicarboxylate metabolism	ko00630	1 out of 230 0.434782608695652%	30 out of 5319 0.564015792442188%	0.735478	1	gene16202：PGP，16202：up
Propanoate metabolism	ko00640	5 out of 230 2.17391304347826%	36 out of 5319 0.676818950930626%	0.0182463	1	gene1084：LDHB，1084：down|gene16320：ABAT，16320：up|gene16774：ACACB，16774：down|gene3182：LDHB，3182：down|gene9514：LDHA，9514:up
Butanoate metabolism	ko00650	1 out of 230 0.434782608695652%	27 out of 5319 0.50761421319797%	0.69775	1	gene16320：ABAT，16320：up
One carbon pool by folate	ko00670	1 out of 230 0.434782608695652%	19 out of 5319 0.357210001880053%	0.568864	1	gene1749：GART，1749：up
Vitamin B6 metabolism	ko00750	1 out of 230 0.434782608695652%	8 out of 5319 0.150404211317917%	0.298034	1	gene11645：AOX1，11645：up
Nicotinate and nicotinamide metabolism	ko00760	4 out of 230 1.73913043478261%	31 out of 5319 0.582816318856928%	0.0428838	1	gene11645：AOX1，11645：up|gene19297：NMNAT1，19297：up|gene21609：NMRK2，21609：up|gene226：NAMPT，226：up
Pantothenate and CoA biosynthesis	ko00770	2 out of 230 0.869565217391304%	19 out of 5319 0.357210001880053%	0.197327	1	gene1067：BCAT1，1067：up|gene3942：GADL1，3942：up
Biotin metabolism	ko00780	1 out of 230 0.434782608695652%	3 out of 5319 0.0564015792442188%	0.124217	1	gene3890：BTD，3890：down
Folate biosynthesis	ko00790	1 out of 230 0.434782608695652%	15 out of 5319 0.282007896221094%	0.485188	1	gene6090：MOCS1，6090：up
Retinol metabolism	ko00830	2 out of 230 0.869565217391304%	41 out of 5319 0.770821583004324%	0.535065	1	gene11645：AOX1，11645：up|gene22950：ALDH1A1，22950：up
Nitrogen metabolism	ko00910	1 out of 230 0.434782608695652%	18 out of 5319 0.338409475465313%	0.549309	1	gene22543：CA9，22543：up
Metabolism of xenobiotics by cytochrome P450	ko00980	2 out of 230 0.869565217391304%	39 out of 5319 0.733220530174845%	0.508018	1	gene6141：EPHX1L，6141：up|gene6936：GSTA3，6936：up
Drug metabolism - cytochrome P450	ko00982	2 out of 230 0.869565217391304%	37 out of 5319 0.695619477345366%	0.47997	1	gene11645：AOX1，11645：up|gene6936：GSTA3，6936：up
Drug metabolism - other enzymes	ko00983	1 out of 230 0.434782608695652%	29 out of 5319 0.545215266027449%	0.723454	1	gene4241：TPMT，4241：up
Biosynthesis of unsaturated fatty acids	ko01040	2 out of 230 0.869565217391304%	23 out of 5319 0.432412107539011%	0.26209	1	Gallus_gallus_newGene_24723：LOC106899679，24723：up|gene24910：TECR，24910：up
2-Oxocarboxylic acid metabolism	ko01210	2 out of 230 0.869565217391304%	17 out of 5319 0.319608949050573%	0.165751	1	gene1067：BCAT1，1067：up|gene15340：ACY1，15340：up
Fatty acid metabolism	ko01212	4 out of 230 1.73913043478261%	49 out of 5319 0.921225794322241%	0.160321	1	Gallus_gallus_newGene_24723：LOC106899679，24723：up|gene11287：ACADSB，11287：up|gene15800：ACSL6，15800：up|gene24910：TECR，24910：up
ABC transporters	ko02010	1 out of 230 0.434782608695652%	47 out of 5319 0.883624741492762%	0.87592	1	gene5351：ABCB8，5351：down
Ribosome	ko03010	2 out of 230 0.869565217391304%	130 out of 5319 2.44406843391615%	0.979121	1	gene13852：RPS27L，13852：up|gene16182：RPL3L，16182：up
RNA transport	ko03013	2 out of 230 0.869565217391304%	159 out of 5319 2.9892836999436%	0.99331	1	gene18633：EIF2S2，18633：up|gene2150：EIF5B，2150：up
mRNA surveillance pathway	ko03015	5 out of 230 2.17391304347826%	79 out of 5319 1.48524158676443%	0.255445	1	gene15468：etf1，15468：up|gene16265：SMG1，16265：up|gene16908：MSI1，16908：up|gene18454：MIS2，18454：up|gene6523：HBS1L，6523：up
RNA degradation	ko03018	2 out of 230 0.869565217391304%	72 out of 5319 1.35363790186125%	0.825523	1	gene23869：PFKM，23869：up|gene25858：ENO3，25858：up
Basal transcription factors	ko03022	1 out of 230 0.434782608695652%	43 out of 5319 0.808422635833803%	0.851695	1	gene7595：TAF1，7595：up
Proteasome	ko03050	1 out of 230 0.434782608695652%	41 out of 5319 0.770821583004324%	0.837872	1	gene5618：PSME4，5618：up
PPAR signaling pathway	ko03320	6 out of 230 2.60869565217391%	69 out of 5319 1.29723632261703%	0.0765058	1	gene13174：ADIPOQ，13174：down|gene15800：ACSL6，15800：up|gene17515：RXRA，17515：up|gene186|gene19728：FABP3，19728：down|gene3070：CD36，3070：down
Base excision repair	ko03410	1 out of 230 0.434782608695652%	36 out of 5319 0.676818950930626%	0.79744	1	gene24642：XRCC1，24642：down
Mismatch repair	ko03430	1 out of 230 0.434782608695652%	22 out of 5319 0.413611581124271%	0.622602	1	gene5721：MSH6，5721：up
Homologous recombination	ko03440	1 out of 230 0.434782608695652%	31 out of 5319 0.582816318856928%	0.746981	1	gene18226：RAD51D，18226：down
Fanconi anemia pathway	ko03460	1 out of 230 0.434782608695652%	58 out of 5319 1.0904305320549%	0.924073	1	gene17928：FAAP100，17928：down
MAPK signaling pathway	ko04010	11 out of 230 4.78260869565217%	281 out of 5319 5.28294792254183%	0.679221	1	gene13978：FGF7，13978：down|gene14901：MAPKAPK3，14901：down|gene16077：GNA12，16077：up|gene16746：MAPKAPK5，16746：up|gene16851：CRKL，16851：up|gene24320：NR4A1，24320：up|gene2823：PAK1，2823：down|gene5876：SOS1，5876：up|gene7312：SOS1，7312：up|gene9599：HRAS，9599：down|gene9602：HRAS，9602：down
ErbB signaling pathway	ko04012	10 out of 230 4.34782608695652%	101 out of 5319 1.8988531678887%	0.0114326	1	gene10683：NRG3，10683：down|gene11500：ERBB4，11500：up|gene15705：CAMK2A，15705：down|gene16851：CRKL，16851：up|gene20767：CDKN1A，20767：up|gene2823：PAK1，2823：down|gene5876：SOS1，5876：up|gene7312：SOS1，7312：up|gene9599：HRAS，9599：down|gene9602：HRAS，9602：down
Calcium signaling pathway	ko04020	9 out of 230 3.91304347826087%	220 out of 5319 4.13611581124271%	0.617818	1	Gallus_gallus_newGene_21069：PHKB，21069：up|gene11500：ERBB4，11500：up|gene14526：PHKB，14526：up|gene14852：TNNC1，14852：up|gene15528：ADRA1B，15528：down|gene15705：CAMK2A，15705：down|gene7557：PHKA1，7557：up|gene9888：SLC8A3，9888：down|gene9947：RYR3，9947：up
Cytokine-cytokine receptor interaction	ko04060	7 out of 230 3.04347826086957%	178 out of 5319 3.34649370182365%	0.656931	1	gene10986：CXCL12，10986：down|gene16239：IL9，16239：up|gene16977：LIF，16977：down|gene20242：IL18，20242：down|gene22328：CLCF1，22328：down|gene22491：CNTFR，22491：up|gene8061：IL15，8061：down
FoxO signaling pathway	ko04068	8 out of 230 3.47826086956522%	147 out of 5319 2.76367738296672%	0.302843	1	gene11915：PRKAG3，11915：up|gene14000：HOMER2，14000：down|gene20767：CDKN1A，20767：up|gene21795：HOMER3，21795：up|gene5876：SOS1，5876：up|gene7312：SOS1，7312：up|gene9599：HRAS，9599：down|gene9602：HRAS，9602：down
Phosphatidylinositol signaling system	ko04070	3 out of 230 1.30434782608696%	105 out of 5319 1.97405527354766%	0.839767	1	gene4634：IMPA2，4634：up|gene6459：SYNJ2，6459：down|gene8588：MTMR7，8588：up
Neuroactive ligand-receptor interaction	ko04080	6 out of 230 2.60869565217391%	297 out of 5319 5.58375634517767%	0.9909	1	gene13601：P2RY14，13601：up|gene15528：ADRA1B，15528：down|gene21839：F2RL3，21839：down|gene23329：LPAR1,23329：down|gene23865：LPAR2，23865：down|gene3483：CRHR2，3483：up
Cell cycle	ko04110	2 out of 230 0.869565217391304%	129 out of 5319 2.42526790750141%	0.978301	1	gene20767：CDKN1A，20767：up|gene20962：CCND3，20962：up
Oocyte meiosis	ko04114	1 out of 230 0.434782608695652%	109 out of 5319 2.04925737920662%	0.992319	1	gene15705：CAMK2A，15705：down
p53 signaling pathway	ko04115	6 out of 230 2.60869565217391%	70 out of 5319 1.31603684903177%	0.0808129	1	gene12027：STEAP3，12027：up|gene19194：TP73，19194：up|gene20767：CDKN1A，20767：up|gene20962：CCND3，20962：up|gene4171：IGFBP3，4171：up|gene6697：SESN1，6697：up
Ubiquitin mediated proteolysis	ko04120	4 out of 230 1.73913043478261%	162 out of 5319 3.04568527918782%	0.926115	1	gene16778：UBE3B，16778：up|gene17966：SOCS3，17966：down|gene3916：UBE2E2，3916：down|gene4981：WWP1，4981：up
Sulfur relay system	ko04122	1 out of 230 0.434782608695652%	8 out of 5319 0.150404211317917%	0.298034	1	gene6090：MOCS1，6090：up
SNARE interactions in vesicular transport	ko04130	2 out of 230 0.869565217391304%	36 out of 5319 0.676818950930626%	0.465585	1	gene1284：VAMP1，1284：up|gene16635：STX2，16635：up
Protein processing in endoplasmic reticulum	ko04141	4 out of 230 1.73913043478261%	174 out of 5319 3.27129159616469%	0.948267	1	gene14452：AMFR，14452：up|gene25692：DNAJB1，25692：up|gene6908：BAG2，6908：up|gene7308：BAG2，7308：up
Lysosome	ko04142	1 out of 230 0.434782608695652%	137 out of 5319 2.57567211881933%	0.997838	1	gene20545：CTSK，20545：down
Endocytosis	ko04144	11 out of 230 4.78260869565217%	283 out of 5319 5.32054897537131%	0.688293	1	gene10703：RET，10703：down|gene11500：ERBB4，11500：up|gene19792：ASAP3，19792：down|gene1985：SH3KBP1，1985：up|gene4120：AMPH，4120：up|gene4981：WWP1，4981：up|gene8590：VPS37A，8590：up|gene9233：VPS37C，9233：up|gene9515：TSG101，9515：up|gene9599：HRAS，9599：down|gene9602：HRAS，9602：down
Phagosome	ko04145	4 out of 230 1.73913043478261%	153 out of 5319 2.87648054145516%	0.904279	1	gene186|gene20684：TUBA1C，20684：up|gene21172：ITGB3，21172：down|gene3070：CD36，3070：down
Peroxisome	ko04146	5 out of 230 2.17391304347826%	82 out of 5319 1.54164316600865%	0.280509	1	gene15800：ACSL6，15800：up|gene21995：ECH1，21995：down|gene6510：PEX7，6510：up|gene6684：DDO，6684：up|gene7147：EPHX2，7147：down
mTOR signaling pathway	ko04150	8 out of 230 3.47826086956522%	162 out of 5319 3.04568527918782%	0.401933	1	gene1084：LDHB，1084：down0|gene1141：PRR5，1141：up|gene14701：SLC7A5，14701：up|gene16407：WDR24，16407：up|gene5876：SOS1，5876：up|gene7312：SOS1，7312：up|gene9599：HRAS，9599：down|gene9602：HRAS，9602：down
PI3K-Akt signaling pathway	ko04151	1 out of 230 0.434782608695652%	8 out of 5319 0.150404211317917%	0.298034	1	Gallus_gallus_newGene_23546：GYS1，23546：up
AMPK signaling pathway	ko04152	1 out of 230 0.434782608695652%	5 out of 5319 0.0940026320736981%	0.198367	1	Gallus_gallus_newGene_23546：GYS1，23546：up
Apoptosis	ko04210	4 out of 230 1.73913043478261%	142 out of 5319 2.66967475089303%	0.870045	1	gene20545：CTSK，20545：down|gene20684：TUBA1C，20684：up|gene9599：HRAS，9599：down|gene9602：HRAS，9602：down
Cardiac muscle contraction	ko04260	2 out of 230 0.869565217391304%	72 out of 5319 1.35363790186125%	0.825523	1	gene14852：TNNC1，14852：up|gene22541：TPM2，22541：down
Adrenergic signaling in cardiomyocytes	ko04261	6 out of 230 2.60869565217391%	147 out of 5319 2.76367738296672%	0.617088	1	gene11781：RAPGEF4，11781：up|gene14852：TNNC1，14852：up|gene15528：ADRA1B，15528：down|gene15705：CAMK2A，15705：down|gene22541：TPM2，22541：down|gene26307：SCN1B，26307：up
Vascular smooth muscle contraction	ko04270	6 out of 230 2.60869565217391%	116 out of 5319 2.18086106410979%	0.386817	1	gene10369：PRKCH，10369：up|gene10995：ACTA2，10995：down|gene11523：RAMP1，11523：down|gene15528：ADRA1B，15528：down|gene16077：GNA12，16077：up|gene18315：PROCA1，18315：up
Wnt signaling pathway	ko04310	6 out of 230 2.60869565217391%	145 out of 5319 2.72607633013724%	0.603606	1	gene14507：NKD1，14507：down|gene15705：CAMK2A，15705：down|gene17809：NOTUM，17809：up|gene20962：CCND3，20962：up|gene4802：SOX17，4802：down|gene8185：DKK2，8185：down
Dorso-ventral axis formation	ko04320	2 out of 230 0.869565217391304%	31 out of 5319 0.582816318856928%	0.390383	1	gene5876：SOS1，5876：up|gene7312：SOS1，7312：up
TGF-beta signaling pathway	ko04350	2 out of 230 0.869565217391304%	88 out of 5319 1.65444632449709%	0.900159	1	gene19344：NBL1，19344：down|gene8492：PITX2，8492：down
VEGF signaling pathway	ko04370	3 out of 230 1.30434782608696%	71 out of 5319 1.33483737544651%	0.599059	1	gene14901：MAPKAPK3，14901：down|gene9599：HRAS，9599：down|gene9602：HRAS，9602：down
Focal adhesion	ko04510	14 out of 230 6.08695652173913%	240 out of 5319 4.51212633953751%	0.154868	1	gene11571：COL6A2，11571：down|gene14180：ITGA11，14180：down|gene16851：CRKL，16851：up|gene17068：TNXB，17068：down|gene18008：CHAD，18008：down|gene20962：CCND3，20962：up|gene21172：ITGB3，21172：down|gene24026：COL1A1，24026：down|gene2823：PAK1，2823：down|gene3736：COL1A2，3736：down|gene5876：SOS1，5876：up|gene7312：SOS1，7312：up|gene9599：HRAS，9599：down|gene9602：HRAS，9602：down
ECM-receptor interaction	ko04512	10 out of 230 4.34782608695652%	103 out of 5319 1.93645422071818%	0.0130255	1	gene11571：COL6A2，11571：down|gene14073：SV2B，14073：up|gene14180：ITGA11，14180：down|gene17068：TNXB，17068：down|gene18008：CHAD，18008：down|gene186|gene21172：ITGB3，21172：down|gene24026：COL1A1，24026：down|gene3070：CD36，3070：down|gene3736：COL1A2，3736：down
Cell adhesion molecules (CAMs)	ko04514	5 out of 230 2.17391304347826%	136 out of 5319 2.55687159240459%	0.707826	1	gene12289：SELP，12289：up|gene20177：CADM1，20177：down|gene21407：CNTNAP1，21407：down|gene23254：VCAN，23254：down|gene373
Tight junction	ko04530	10 out of 230 4.34782608695652%	148 out of 5319 2.78247790938146%	0.106366	1	Gallus_gallus_newGene_15489|gene10369：PRKCH，10369：up|gene17665：MYH1F，17665：down|gene17669：MYH1B，17669：up|gene17671：MYH1E，17671：up|gene17673：MYH1C，17673：down|gene17674：MYH1G，17674：up|gene18074：MYH8，18074：up|gene9599：HRAS，9599：down|gene9602：HRAS，9602：down
Gap junction	ko04540	6 out of 230 2.60869565217391%	102 out of 5319 1.91765369430344%	0.27856	1	gene20684：TUBA1C，20684：up|gene23329：LPAR1,23329：down|gene5876：SOS1，5876：up|gene7312：SOS1，7312：up|gene9599：HRAS，9599：down|gene9602：HRAS，9602：down
Toll-like receptor signaling pathway	ko04620	1 out of 230 0.434782608695652%	100 out of 5319 1.88005264147396%	0.988472	1	gene20545：CTSK，20545：down
NOD-like receptor signaling pathway	ko04621	1 out of 230 0.434782608695652%	50 out of 5319 0.940026320736981%	0.891464	1	gene20242：IL18，20242：down
RIG-I-like receptor signaling pathway	ko04622	1 out of 230 0.434782608695652%	64 out of 5319 1.20323369054334%	0.941943	1	gene20894：SIKE1，20894：up
Cytosolic DNA-sensing pathway	ko04623	1 out of 230 0.434782608695652%	51 out of 5319 0.95882684715172%	0.896202	1	gene20242：IL18，20242：down
Intestinal immune network for IgA production	ko04672	2 out of 230 0.869565217391304%	42 out of 5319 0.789622109419064%	0.548203	1	gene10986：CXCL12，10986：down|gene8061：IL15，8061：down
GABAergic synapse	ko04727	1 out of 230 0.434782608695652%	8 out of 5319 0.150404211317917%	0.298034	1	gene9929：GPHN，9929：up
Regulation of actin cytoskeleton	ko04810	12 out of 230 5.21739130434783%	219 out of 5319 4.11731528482798%	0.237556	1	gene13065：ARHGEF4，13065：up|gene13978：FGF7，13978：down|gene14180：ITGA11，14180：down|gene16077：GNA12，16077：up|gene16851：CRKL，16851：up|gene21172：ITGB3，21172：down|gene2823：PAK1，2823：down|gene3776：SCIN，3776：down|gene5876：SOS1，5876：up|gene7312：SOS1，7312：up|gene9599：HRAS，9599：down|gene9602：HRAS，9602：down
GnRH signaling pathway	ko04912	5 out of 230 2.17391304347826%	102 out of 5319 1.91765369430344%	0.453272	1	gene15705：CAMK2A，15705：down|gene5876：SOS1，5876：up|gene7312：SOS1，7312：up|gene9599：HRAS，9599：down|gene9602：HRAS，9602：down
Melanogenesis	ko04916	3 out of 230 1.30434782608696%	104 out of 5319 1.95525474713292%	0.834993	1	gene15705：CAMK2A，15705：down|gene9599：HRAS，9599：down|gene9602：HRAS，9602：down
AGE-RAGE signaling pathway in diabetic complications	ko04933	5 out of 230 2.17391304347826%	108 out of 5319 2.03045685279188%	0.503814	1	gene11472：COL3A1，11472：down|gene24026：COL1A1，24026：down|gene3736：COL1A2，3736：down|gene9599：HRAS，9599：down|gene9602：HRAS，9602：down
Salmonella infection	ko05132	1 out of 230 0.434782608695652%	84 out of 5319 1.57924421883813%	0.976319	1	gene20242：IL18，20242：down
Influenza A	ko05164	5 out of 230 2.17391304347826%	155 out of 5319 2.91408159428464%	0.808304	1	gene1281：KPNA1，1281：up|gene14238：FURIN，14238：up|gene17966：SOCS3，17966：down|gene20242：IL18，20242：down|gene25692：DNAJB1，25692：up
Herpes simplex infection	ko05168	2 out of 230 0.869565217391304%	181 out of 5319 3.40289528106787%	0.997242	1	gene17966：SOCS3，17966：down|gene8061：IL15，8061：down
Transcriptional misregulation in cancer	ko05202	1 out of 230 0.434782608695652%	7 out of 5319 0.131603684903177%	0.266264	1	gene12356：PBX1，12356：up
